# Supplementary material for: Origin and Isoform Specific Functions of Exchange Proteins Directly Activated by cAMP: A Phylogenetic Analysis
Source: MDPI journal article supplement (doi:10.3390/cells10102750), 2021-10-14
Supplement: s1 [file s1]

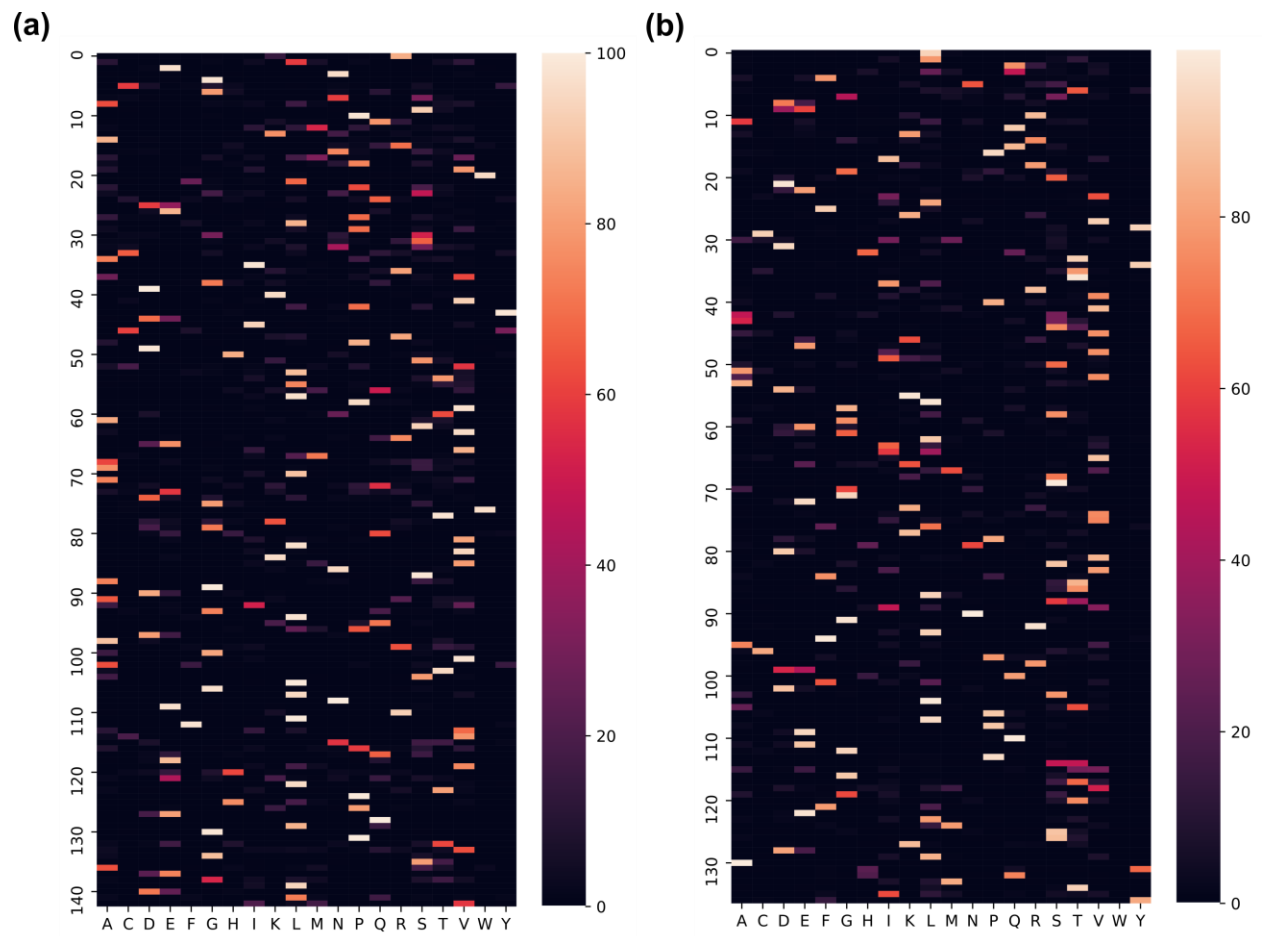

**Supplemental Figure S1. Sequence alignment of EPAC1 and EPAC2 RA domain.** Distribution of amino acid residues of aligned RA domain of EPAC1 (a) and EPAC2 (b) across species.

```
>Rapgef0_[Acanthamoeba_castellanii_str._Neff]_470530403
```

-----MEEGLSPRLGSAHS-AAVGSPRSHGAKDYREEIRNKRQLTUIPE-----  
LHAQESLDALPIRMSEACTLRTRPNSSNNPAPYTTITIVGP-----NDGSEAELVSAFVNS  
DGAPQLDASPRSHR--GAKESGGDGASQEAMDLYLSSWKKKFNFAGKEYLLELHAGLHTQ  
AETALDKGANVHIHDQFESSSGFMFLYDVTSRETFAEVMRVHSLIVRSKN---VEKGKA  
KGLIPMIV-LANTRNSFQHQQRQPAQPPPGGDS PSSSHPMVSVT-APDGSDAIASMSGVS  
GVAVSASGDSATATTTQSPEREVTTEEGLFAYACNCPFYEISSTTNYADVLNAFQQLLG  
EIIKGQRTRKAAADPASKLTQLGVKGNWRRSQLASLVSSASSPSSYGVSPPLSPPLSPLS  
SPPQPRIEPVLPGSARGVDDDSAAARALAAKAQGGGGLLAPTTT--TSS----SSEA  
KE-ELHESLKDQRQKAFRYTRVDAADIKYLPPLDAEPNS-----KPR---IRAATLPKL  
IEKLTYPKY-----PDT--DLV-----A--T-  
FLLTYRS--FT-----TPEELLHFVM-----RRY-----  
-----ETTA-----P--ADLDKE--GLRLWEASEMLPIRLRVINVLKS  
WISDHFYDFYDS-KTLLDTLK---DFVDK-QLSVPTN-----LKGPLQQ-----  
--L-----KKSIE-----  
-----TNE-----MER-----  
  
-----RARKE--YM-----FS-----  
-----SKPPKSVISK-----  
-KVAKA-----  
-----K--PQEI-----  
---DLRDIDPIEMARQLTLIDYDLLSRITAKEWLAHNEWATNKAKKRDE-SKPAAPNLV  
AMINH-----FNCVSKWV-----ATEIVKCAKIKHR-----VLLTKKFIEVAQHC  
-----LKLNNFNMLMAIVTGGLGNVSVYRLKYSWK-----  
-----SLPKKTLIAYEE-LSRIL-----CDSL SNF--  
-NSLRT---AIRT-----SVPPTI-PYL G-----  
LYLSDLMYIEDGNAD---EVE-----GGLINFE-KR  
-----RL---KAETIKDLQHFQT--SP-----YCL-----  
-----TEIP--V-----LQY-----YF  
RSLDHL-SEAEL-----YRMSCLL-----  
-----EPHSRORGASIVNAPSRGMADOL--SASGALDLES SDGEIOGVSSDEI

LLGRDGGAHAL----SSSPPPSSPFAQMTRAGGFTPSGLMLSHFEVPLRAKAATGERDTE  
RTPRVGAVLRAQAKLLEAVAATFS-----FADVARATAAVDVLR----QWE  
AQVASRKLFIKDHSD-----FAGLDGDDDSGGGGAELKGD--NYSVDGQ  
QRKQNGSKRKERARGEKGEKGEKGEKPPSSSKLGQHQTGEEAQQHHRTFGFEEVLMESRAV  
ELAVERFLQTATVEGILEATRADPIGGGWLAFAEAFHLKRLGGQRPFAVTELLFALVKL  
LDKGTACFDAAAVAGMVGLYKKQPVRLAAHFVTDEAEAEELADRHDLVELEDREGVRTIQ  
SYTKEVRLAFQILNLEKRILQAVKTSRPDGSMLYEALCVDREVWHRTQEVLLHHTSPKSP  
TAPNPSEPSGGRTSETTHKIIGELIQLVDKQLCEVSREDMQRFNESFEDALEEYFGWMGV  
YLRKLWDKLVLIHKRTEKIVQMMKESSGNSHSAKDSNAISKAANAWREKDLVHLHALIAA  
VDQAETTVNKFLESCPASSADGFDVTEDELKELLSQNNVFEQIIKMRRLOKTLEEQHARI  
ADV

>Rapgef0\_[Ancylostoma\_ceylanicum]\_510856406

-----MLTVSNEAI-----  
-----AAYFQ-----SFEARILEV-----GSHLK-HAMYTQA  
PH-L-----IRERIIH-----KV-----PYA-----DC-MI  
GS-----EMVDWLLDLS-----  
---VST---GAHSPALSRFQISGMW---QTLLEHNVIC---  
-----HGMAY-----SFAVGVARITITG-ELQFVDKL-VCYRWVDG  
--GRTDRRMAN---GV-P-----  
-----GRFPLGD  
PRLKEEVPSREDI-----ASAVFFLSTVGPDAL-----FRMILKKLPQDRT  
PEELE-----LVYEELLHVKALSHLS-TMVKRELA-TVIGYEHHTHAGTVL-----  
-----FHQGDGP--KNWYIIL  
RGSVDVSIHGK-----GV-----VCTLQEG-DDF  
GKLAL-----VNDSRA---ATITLREDHAQFLTVDKHDENR-----ILRD--  
-----V-----

-----EANTVRLKEHGQDVLVLEK-----INL-----  
-----P-----RGAAIEG---GLTNTGKGHC---YSVMAGLAEKM  
LEYVLET-----RVDA-----QEDG---AELDVFL---D-  
LVLTHII--YL-----PTNTLCNYLK---H-----  
-----YYSR-A-----AEPHS---DP---LVVLDLLEHRLSARRRVVTFWL  
WVNALGIHYFLD-PAANAFVE---ELYCH--VLEDH-----RTL-----PGMGPI-  
-----LARISALRD-LREEARRTL-----  
---AR-----HPAV-----VLECGVLSTM  
A--PSPNP-----

-----VLPSDI--CN-----QI  
IHLSDTTSFALPIRMDKTATEICE-----LVRSR-----LR-SSHGEELAL  
VEVKSS-----GEKVV-----FYDGDVSIATMLSLNSKLYVV  
SKDE---I-DSL-VQLDQ-----NGP-----VESVH  
AS-VMEYVGSHELAAQQLVLHTQLFEATDEIELVT-----QVIGRDQF-PGRVPSNLD

```

LLMR-----S-
-----AKENRDLMTLFAITL-GLSNIAVSRLTHLWE-----
-----RLPAKLRRQFAE-FESLL-----DPSRNH-----
-RPYRA---LVAK-----MSPPLI-PFVP-----
LLLKDLTFIHEGNK--TY-YN-----G-LVNFE-KM
-----HM--IANILRSFRQCKSRYS-----VTQM-----E--
-----QKKI-----F-----ETQN-----FI
RNFRVVDNQRRLE-----MELSYQI
-----EPRR-----RRN-----

```

```
>Rapgef0_[Ancylostoma_duodenale]_748380306
```

-----MWIKDYGK-KKLIFHC-----  
-----SRSVIV  
NGLVEVVKPNGER-----V-----EYKLG-DSF  
GAEPN-----PAVQYHV--GEMRTMVDDCEFVLVEHKDFCS-----IMST--  
-----I-----

-----RDKIARIVLL  
WVNNHYNDFETN-DEMTKLE---RFEGA--LERDGMHSQQSLLNIACSV-KARSRTVV  
YAR-----ANKDDALHFTVQGGKECGCGIFISEVQVDSPAELCGMK  
RGDEVLDVNGQPMKYLTAKAQEIMKGSISLTITLKS NVLGFKELLGKTERDGSKVSSKN  
RALAGVLAQARGSM PNVIPVKS AVKIGGKTSMMDKLMTILKSSKEGEDVPDEARTTTN  
PLRPSRSNPDITSISQYYGPVKSECPEHVLKIYRSDQTFKYLA VYKETTAQNVVQLALQD

[illegible]

[illegible]

```
>Rapgef0 [Calliphora vicina] 158935664
```

-----T-----VATLKSG-DDF  
GKLAL-----INDAPRA--ATIVLKENNCHLLRVDKEHFNR-----ILRD--  
-----V-----  
-----  
-----EANTLRLQEHGKDVLVLER-----VAK-----  
-----QRGQ--HS-----AFK-----YTVMSGTPSKM  
LEHLLLET-----RL--G--T-----QVSG-----VDPFLD--D-  
FLLTHIV--FM-----PVVQLVDELA-----N-----  
-----YF--HCDT-----N--DG--AQTPDDRGYIVNFKKRVIQFMQK  
WVMAVRHAAAFDE-PSVCFDIE---ELAAE--VEAD-----PELQEET  
SII-----  
---HNI-----LTQMARYQD-DRNQNAGQK-----  
---WKLPP--NGQPIC-----LFSGNLT--  
---PSKT--V-----  
-----  
-----  
-----IRPDD--II-----FR-----  
VYCADHTYCTLRFLHTTAEIIKA-----CAADK-----LQLNRGPEDLCL  
VEVESN-----GERSV-----FKDNDVSIPTGLSLNGRLFVS  
VKDH--L-DALT-PLQE-Q-----EGP-----TEAIE  
I--DLELLSTKELAYYITTFDWDLFWAVHEYELLY-----HTFGRHHF--GKITANLD  
VFLRR-----FNELQYWI----VTEIVSAASMSKR-----VGLLRKFIKLAAY-  
-----CKEYQNLNFAFFAIVM-GLSNMAVSRLQQTWE-----  
-----KIPSKFRKLYQE-FEALI-----DPSRNH--  
-RAYRV---FVGK-----LQPPLI-PFMP-----  
LLLKDMTFAHEGNK--TS-LD-----G-LVNFE-KM  
-----HM--MAQTMRTLRFCRS--R-----SLGL-----EPP--  
-----SPKSE-----G-----EVR-----FI  
SCLRVI-----







VFQRR-----FNEVQFWV----VTEMCLATSLSRR-----VQLLRKFIKIAAH-  
-----CREYQNLNAFFAIVM-GLSNVAVSRLSQTWE-----  
-----RLPGKLRRTFAE-FETLI-----DPSRHH-----  
-RRYRV---AVSK-----ISPPLV-PFMP-----  
LLLKDMTFCHEGNK--TY-ID-----G-LVNFE-KM  
-----HM--IGQTLRSLRHSRS-Q-----RINLEP-  
-P-----PQ-GKVQ---Q-----DVRE----YI  
RTLKVIDNQRL-----TQLSHAL  
-----EPRR-----P-----



-----MIARIVLL  
WVNNHYNDFETN-DEMTKLE----RFEGA--LERDGMHSQQSLLNIACSV-KARARTVI  
YTR-----A-----

-----NKDDPLHFIAIQGGKESGCGIFVNEVQ-----  
---V-----DSPAERCGIKRGDEVLDVNGQPMKYMALAKAQEMLKGSISLTLTKSNVLG  
FKELLGRSERDGSKVAAKNRALAGALCQSRGSI PNVIPVKTA-----KAVKIGG--KQSL  
AFMAIGYITNSFFIAFVEIVKVGKTSMMDKLMTILKASK-DGEDLPD----EART----T  
MSPLRPSRSNPD--IT-----SISQYYGPVKSECPEHVLK-----  
IYRSDQTFKYLA VYKETTAQNVVQ-----LALQ-----EFNMTAE-GSLEWSL  
CECTVT-----EDGVIKQR--RLPPQMENLAERIALNSRYYLK  
NNNR-----SEP-LVPDDL-----AP-----EIMRE  
AQAQLLT LNAQVVAAQLTLQDFAVFASIEPTEYI-----DNLFQLESR-YGS--PRLE  
EFERI-----FNREMWWV-----ATEVCSERNVQKR-----AKLIKKFIKIARH-  
-----CRELRNFNSMFAIMS-GLDKPAVRRLHSTWE-----  
-----RISGKYIRMLED-VQQLV-----DPSRNM---  
-SKYRQH LAE-VSQ-----E-PPVV-PIYP-----  
VIKDLTFSHEGNP--TY-CE-----K-LVNFE-KL  
-----RL---IAKSVRAVSKLSSAPYEISSMAERSGGT-ISDALLHMN---TFEGG--  
NV-----ATMRK---G--GRVIQPRKKVYEQALMVRKVKS-----YL  
DGLKVVDTESEL-----DRLSYDI  
-----EPQ-----QSGPRV-----RRAPSPSPSSVSSQSAESN  
S-----TDQRR-----FRGGGMFGVDSPQAVQKMLGLVQTSKSKGV  
PSPSQSPAFSSASRPLQRNVPRVSSRQQSVPTLQLQRTPSFKQE-----PVDLN  
KESSSVTTTFYGADVLI-----

---  
>Rapgef0\_[Pediculus\_humanus\_corporis]\_242021899

-----M-STSNLSV-FNKENFFFDFFSFFIFFLFFQ-----  
KNKD--SMSEFI-----G-NSKHKNYGGKP-GAMTY-----TMTSTG---  
-NKPQ-----PSSPDIPDSVS-----  
-----PILE-----  
-----SPSAPVSHI-----GWVLR-SVLLCKT  
IL-----LKDRKIK-----N-K-I-----LWKC-GS  
GI-----ELVDWLCD-----  
---QMDT-----SRQQATIMW---QVLIIEGVLI-----  
-----H-----VNR-EHIFKDKN-LLYQFWED  
E-----D---GG-----  
-----GKLPN

```
>Rapgef0 [Wuchereria bancrofti] 402590062
```

```
-----MRTLVD DCE FVLVEHRDYCN-----IMST--
-----I-----
-----SEHIEQHSDGITGEIVSEIE-----R--RS-----
-----VGNQ-----M-----GQ-----VLIKANRDKL
IEHLVEERD-----TA-----VDA-----H-----YIE-----D-
FLLMYRV--FI-----NDPTMIFEKLM-----HWF-----AESNL-----
-----RDKIARIVLL
WVNNHFND FECN-GEMMQLLD-----RFEQA--LERDQMHSQQSLLNIACSV-KSRTRNIV
YSR-----
-----SSRD-----QPLSL SILGGKENGSS
GIFVSDVQRGSRAEKIGLKRGDQIIIEVNGQSFKKISLIRALEVLRNTHLSITVKSNNLLG
FKEMIARSERAVDVEDQC NAYRKGA--EIRYTKHRAVSKQSESVQRGSVSCMIG-MNPRT
GASSFSYLPPSGMISSVG----NKTSMMDKLLTMLKGLP---STLPDGPIAESKTLNPTR
SNSLRASRSNPD--IAGH SVGTSRISTMNIAQYYQPASSPCPEHVLK-----
VYRADQSF KYLTIYKETTAQNVVQ-----LALQ-----EFGMSSDSGSLEWAL
CETTVT-----LDGVIKQK--RLPDQMNNLAERIQLNSRYYLK
NNSR-----SEP-MVPDEL-----AP-----EVLKE
AETHLLQLNAQILAAQLTLQDFDVFS SIEPTEYV-----DNLFNLESK-YGW--PKLA
DFESL-----FNKEMWWV-----ATEICREKGLQKR-----MKLIKKFIKVARY
-----CRDFRNFN SMFAIMS-GLEKPAVRRLHHTWE-----
-----RVPSKYTKMFED-VQH LV-----DPSRNM---
-SKYRQHLAI-VSQ-----E-PPVV-PIYP-----
ILKKDLTFSHEGNP--TY-CE-----K-LINFE-KL
-----RM---IAKTIRSVTKLCSSPYEIGVMAQQSGGNDVSDALVNMN---SFDGGAG
TV-----STMRKVGP NAMKTATQPRRKLYEQALMVRKVKS-----YL
SNLNVVECETDL-----DQLSYEC
-----EPSY-----GSTNVTR-----RRAPSPSPSSLSQS-----
S-----TSDQHRI-----SAPKFGVESPHAVQKMLS LAQNSRLKQG
---CSGNLILVS--PLQSPLLPSKGVRLRNTPLPVR RVPSTSQHHSTVTTTTSDVQPVDLN
AESSSVTRGL-----
```

-----  
---  
>Rapgef3\_[Acinonyx\_jubatus]\_961722103  
-----

-----M-----  
-----K-----VGWPGES-----  
-----RWQVGLAVED-SPALGASQVRG-----LPDVVPEGTLNLMVLKRMHRPRSCSYQ-L  
LLE-----HQRP-S-----CIQ-----  
-----GLR-----WT-----  
-----PLTDSEESLDFSV-SLEQA-----S-----T-----  
-----ERVL-----RA-----GKQLH-RHLLATC  
PT-L-----IRDRKYH-----L-RLY-----RQC-CS  
GR-----ELVDGILALS-----L  
-----GVH-----SRNQAVGIC---QVLLDEGALC-----  
-----H-----VKH-DWTFQDRDTQFYRFPGP  
-----EPEP--VGVHEL-----  
-----EEEL-----VEAMALLSQRGPDAL-----LTVALRKPPGQRT  
DEELD-----LIFEELLHIKAVAHLS-NSVKRELA-AVLLFEPHSRAGTVL-----  
-----FSQGDKG--TSWYIIW  
KGSVNVVTHGK-----GL-----VTTLHEG-DDF  
GQLAL-----VNDAPRA---ATIILREDNCHFLRVDKQDFNR-----IIKD--  
-----V-----  
-----EAKTMRLEEHGKVVLVLER-----A-----SQG  
AG-----PSRP-----PTPGRN-----R-YTVMSGTPEKI  
LELLLEA-----MRPDSSAHDPT-ETF-----LS---D-  
FLLTHSV--FM-----PSAQLCAALL---HHF-----H-----  
-----AEPS---GGSEQEHSTYVCNKRQQVLRRLVSQ  
WVALYGPMLYAD-PVATSFLQ---KLSDL--VSRDA--RLCILLR---EQ-WPERRK-H  
HRM---ENGCGNA--SP---QMKAR-----NMP-----  
-----VW-----LPGQD-----QP-----  
-----L-----  
---PSSN-----  
-----CAIRVGDK--VP-----YD-----  
IYRPDHSVLTLLRLPVTASVREVMA-----ALAQEDG-----WT-----KGQ--EL  
VKVNSA-----G-----DAIGLPPDARGVATSLGLNERLFFV  
NPQE---V-RELT-PLPEQL-----GP-----SVGSA  
EG--LDLVSAKDLAQQLTDHDWNLFNSIHQVELIH-----YVLGPQHL-RDVTTANLE  
RFMR-----FNELQYWV-----ATELCLCPVPGLR-----AQLLRKFIKLAAHL  
-----KEQKNLNSFFAVMF-GLSNSAISRLAHTWE-----  
-----RLPHKVRKLYSA-LERLL-----DPSWNH---  
-RVYRL---ALTK-----LSPPII-PFMP-----  
LLLKDMTFIHEGNH--TL-VE-----N-LINFE-KM  
-----RM---MARAVRMLHHC-----



```
-----  
-----  
-----  
-----  
-----  
-----  
  
---  
>Rapgef3_[Ailuropoda_melanoleuca]_752406281  
-----  
-----M-----  
-----  
-----K-----VGWPGES-----  
----RWQVGLAVED-SPALGVSQVGG---LPAVVPEGTLLNMVLKRMHRPRSCSYQ-L  
LLE-----HQRPS-----RIQ-----  
-----GLR-----WT-----  
----PLTDSEESLDTSFV-SLEQA-----S-----A-----  
----ERVL-----RA-----GKQLH-RHLLATC  
PT-L-----IRDRKYH-----L-RLY-----RQC-CS  
GR-----ELVDGILALG-----L  
----GVH-----SRSAVGIC--QVLLDEGALC-----  
-----H-----VKH-DWTFQDRDTQFYRFPGS  
-----EPEP-VGIHEL-----  
-----  
-----EDEL-----VEAVALLSQRGPDAL-----LTVALRKPPGQRT  
DEELD----LIFEELLHIKAHAHLNSSVKRELA-AVLLFEPHSKAGTVL-----FSQGDKG--TSWYIIW  
KGSVNVTTHGK----GL-----VTTLHEG-DDF  
GQLAL-----VNDAPRA--ATIILREDNCHFLRVCKQDFNR-----I IKD--  
-----V-----  
-----  
-----  
-----EAKTMRLTEEHGKVVLVLER-----A-----SQG  
AG----PSRP-----PTPGRN-----R-YTVMMSGTPSKI  
LELLLEA-----MRPDSSAHDPETEF-----LS--D-  
FLTYSV-FM-----PSAQLCAALL-HHF-----H-----  
-----AEPS---GGSEQEQSTYICNRRQQILRLVGQ  
WVALYGPMHTD-PVATSFLQ---KLSDL--VNRDA--RLCILLR--EQ-WPERRR-H  
HRL---ENGCGNA--SP---QMKA--NMA-----  
-----VW-----LPGQD-----QP-----  
-----L-----  
---PSSN-----  
-----  
-----  
-----CAIRVGDK--VS-----YD-----  
ICRPDHSLVTLTKLPVTASREVMA-----ALA QEDG-----WT-----KGQ--VL  
VKVNSA-----G-----DAIGLQPEAROVATSLGLNERLFVV  
NPQE--V-HELT-PHQEL-----GP-----TVGSA  
EG--LDLVSAKDLAGQLTDHDWNLFNSIHQVELIH-----YVLGPQHL-RDVTTANLE
```







[illegible]

-----T-----  
-----PLLD-----TESSLEYGH-----SLTQAS--P-----  
-----EKIW-----RAGKLLF-----T--H--LTSTC  
PG-L-----IRDHKHH-----L-RHH-----RQC-CS  
GK-----ELVDWLLNAG-----L  
----GVQ-----MRSQAVGVG--QVLVDGGVLT-----  
-----H-----VKQ-EWHFQDKDTQFYRFAEL  
E----LSPEP-GAGLRDA-----  
-----  
-----EEL-----LEAVAFLAQLGPDAL-----LTMALRKPPAQRT  
EDELE----LIFEELLHIKAVAHLS-NSVKRELA-AVLMFESHQRAGTV-----  
-----LFSQGDKG--TSWYIVW  
KGSVNVVTHGK----GL-----VATLHEG-DDF  
GQLAL-----VNDAPRA--ASIIILREDNCHFRLVDKQDFNH-----ILKD--  
-----V-----  
-----  
-----EANTMRLKEHGKVVLVLQKNL-----QG  
G-----SSQP-----AAARSS-R-----YLV MAGTPEKI  
LEHLLLEF-----MRLDATLYDPV-D-----TLLG--D-  
FL-----LCHPILVPLTGPSF-----R-----  
-----AEPL E--GSEQEKATYSLHKRRKILRLVSQ  
WVLLYGRL LQGD-RSPTALLQ---NLAD--LASRDP--RLGGMVQ--EQ--ERRR-  
PRA--LENGD GSA--SP-----QPKARS-----SVS-----  
-----W-----LA-----EA-----  
-----LT-----  
-----PA-----  
-----  
-----  
-----  
-----  
-----VP-----YE-----  
IYRPDHSCLVTVPINASVRDVL R-----SLAPRLG-----RDRE-HLL  
VKVNSA-----GDKVG-----LQLDAVG VFTSLGLNERLFAV  
SVEE--L-GGLT-PHPEQL-----GP-----HVGSS  
ET--LDLISSKDLASHLTDYDWNLFKSIHQVEMIH-----YIVGPQKF-HEVT TANLE  
RVMRR-----FNELQYWV-----ATELCLCPEVGRR-----AQLLRKFIKLA AHL  
-----KEQKNLNSFFAVMF-GVSNTAVSRLAKTWE-----  
-----RLPHKIRKLHAA-LERML-----DPSWNH--  
-RVYRL---AVAK-----LSPPII-PFVPL-LLKGGCRRFG-----GAGSPLHA-  
----SSLSQRPGNQ--AQGSLWTPLLL GWGVTGQPLLKPQGACVF PAGEQN-GVGWQ-QV  
TFVHCPQHM--MAKTVRVLQRCRG--QA-----HAPLSPLRS  
RSPHRPEDPKAVRMST-----  
-----C-----SEQSLSV  
RSPVSTWAY-LQHLKAIDSQKELLRLSRDLES-----

-----  
---  
>Rapgef3\_[Aotus\_nancymaae]\_817288343  
-----

-----M-----  
-----K-----VGWPGES-----  
-----CWQVGLAVED-SSALGAPQVGA---LPDVVPEGTLNLMVLRRMHRPRSCSYQ-L  
LLE-----HRRP-S-----RIQ-----  
-----GLR-----WT-----  
-----PLTNSEESLDFSE-SLEQA-----S-----T-----  
-----ERVL-----RA-----GKQLH-RHLLATC  
PN-L-----IRDRKYH-----L-RLY-----RQC-CS  
GR-----ELVDGILALG-----L  
-----GVH-----SRSQAVGIC---QVLLDEGALC-----  
-----H-----VKH-DWAFQDRDAQFYRFPGP  
-----EPEA--VGAHEM-----  
-----EEEL-----AEAVALLSQRGPDAL-----LTVALRKPPGQRT  
DEELD-----LIFEELLHIKAVAHLS-NSVKRELA-AVLLFEPHSGAGTVL-----  
-----FSQGDKG--TSWYIIW  
KGSVNVVTHGK-----GL-----VTTLHEG-DDF  
GQLAL-----VNDAPRA---ATIILREDNCHFLRVDKQDFNR-----IIKD--  
-----V-----  
-----EAKTMRLEEHGKVVLVLER-----A-----SQG  
AG-----SSRP-----PTPGRN-----R-YTVMSGTPEKI  
LELLLEA-----MGPDSTAHDP-ETF-----LS---D-  
FLLTHRV--FM-----PSAQLCAALL---HHF-----H-----  
-----VEPA---GGSEQERSTYVCNKRQQILRLVSQ  
WVALYGSMLHTD-LVATSFLQ---KLSDL--VSRDA--RLSNLLR---EQ-WPERRR-H  
YRL---ENGCGNA--SP---QMKAR-----NLS-----  
-----IW-----LPNQD-----EP-----  
-----L-----  
---PGSS-----  
-----CAIRVGDK--VP-----YD-----  
ICRPDHSVLTQLPVTASVREVMALRGHMHPCILSTHPGLRPRCWE-----KQP--PS  
LPNSTSTLVSSWSLASLPSPTQATSAVFA-----DAIGLQPDARGVATSLGLNERLFVV  
NPQE---V-HELT-PHPEQL-----GP-----TVGSA  
EG--LDLVSAKDLAQQLTDHDWSLFNSIHQVELIH-----YVLGPQHL-RDITTANLE  
RFMR-----FNELQYWV-----ATELCLCAVPGPR-----AQLLRKFIKLAHL  
-----KEQKNLNSFFAIMF-GLSNSAISRLAHTWE-----  
-----RLPHKVRKLYSA-LERLLVSLSPAGPGSA-----GISWAQPCL  
PDTLIL---GFPE-----APLPVLWPVCPSPGAPRGLWKRRGKSWGQRAGVWGMNET  
RLFADMTFIHEGNH--TL-VE-----N-LINFE-KM  
-----RM--MARAARMLHHCRRSHNP-----VPLSPLRS  
RVSHLHEDSQVSRISTCSEQSL-TR-----S-----PASTWA-----YV  
QQLKVIDNQREL-----SRLSREL  
-----EP-----





RVMRR-----FNELQYWV----ATELCLCPEVGRR-----AQLLRKFIKLA AHL  
-----KEQKNLNSFFAVMF-GVSNTAVSRLAKTWE-----  
-----RLPHKIRKLHSA-LERML-----DPSWNH-----  
-RVYRL---AVAK-----LSPPII-PFVPL-LLK-----  
---DMTFIHEG NR--TLA-----EN-LINFE-KM  
-----HM--MAKTVRVLQRCRG--DA-----HAPLSPLRN  
RSPHRPEDPKAVRIST-----  
-----C-----SEQSLSV  
RSPVSTWAY-LQHLKAIDSQKELLRLSHDLES-----

```
>Rapgef3 [Apteryx australis mantelli] 926500193
```

-----EEL-----LEALAFLAQLGPDAL-----LTMALRKPPPTQRT  
EDELE-----LIFEELLHIKAVAHLS-NSVKRELA-SVLMFESHQRAGTV-----  
-----LFSQGDKG--TSWYIIW  
KGSVNVVTHGK-----GL-----VATLHEG-DDF  
GQLAL-----VNDAPRA--ATIILREDNCHFLRVDKQDFNR-----ILKD--  
-----V-----



[illegible]

--EDEL-----QEALSLLCQLGPDAL-----LTMILRKSPSQRS  
AEDTE----VIYEELLHVKAAAHLS-ASVRKELA-AVLVFESHAKAGTVL-----  
-----FSQGDKG--TSWYIIW  
KGSVNVITHGK----GL-----VTTLHEG-EDF  
GQLAL-----LNDAPRA---ATIILREDNCHFLRVDKQDFIR-----ILKD--  
-----V-----  
  
-----EANTVRLEEHGKTVLVLEK-----S-----  
EN---SSEQG-----GAGANS-----K-YTVMSTPEK  
LEHLET-----MKLDLNGNDPI-DP-----CIS---D-  
FLLTYKV--FM-----SSSQLCAALQ----NQY----Q-----  
-----AEELSE---GSEQEKDAYVLNTKQKVVKLIGQ  
WVALYSFLLKED-PVTLDLFLE---RMKKE--VAADC--RLSNILK---EQ-FKERRR--  
TKM--LENGYQSL--S-----R-N-QQFD-----  
-----W-----FSHCE-----EP-----  
  
---SGRV-----  
  
-----LPIRSQDK--VL-----YE-----  
IYKSDYKALSMLPVDSSVQEVMS-----AIVQPG-----GDH--VL  
VKMNSS-----G-----ERAQLKLDASSVYTALGLNERLFIC  
TSSE--V-EQLR-PLKEQQ-----GP-----EQGTA  
DL--IEQMSSKDIGIELTNYDWELFTAMHEVELVY-----YIFGRHKF-PGAITANLE  
RFVRH-----FNEVQYWV----VTELCLCEDLVKR-----AVLLKKFIKIASVL  
-----KDQKNLNLFFAVMF-GLGNSAVQRLYKTWE-----  
-----RIPSKTKRIYCT-YERLM-----DPSRNH---  
-RAYRL---AVTK-----LSPPYI-PFMP-----  
LLLKDMTFIHEGNP--NC-LD-----K-LVNFE-KM  
-----RM---LAKTVKIVRGCRSQPY-----VPSSPQRG  
LADRIFLEG-TRLSTSSEHAFLR-----T-----PSNIRH-----YI  
QNLKVIDNQKL-----TQLSRSM  
-----EC-----  
  
---  
>Rapgef3\_[Balaenoptera\_acutorostrata\_scammoni]\_594662221  
-----M-----  
  
-----K-----VGWPGES-----  
-----RWQVGLAVED-SSVLGAPPVGG---LPDVVPEGTLLSMVLRRMHRSRSCSYQ-L  
LLE-----HORP-S-----CIO-----

```

-----GLR-----WT-----
-----PLTNSEESLDFSV-SLEQA-----S-----T-----
-----ERVL-----RA-----GKQLH-RHLLATC
PN-L-----IRDRKYH-----L-RLH-----RQC-CS
GR-----ELVDGILALG-----L
----GVH-----SRSQAVGIC---QVLLDEGALC-----
-----H-----VKH-DWAFQDRDQTQFYRFPGS
-----EPEP--AGIHEL-----
-----
-----EEEL-----AEALALLSQRGPDAL-----LTVALRKPPGQRT
DEELD----LIFEELLHIKAVAHLS-NSVKRELA-AVLLFEPHSKAGTVL-----
-----FSQGDKG--TSWYIIW
KGSVNVVTHGK----GL-----VTTLHEG-DDF
GQLAL-----VNDAPRA--ATIILREDNCHFRLVDKQDFNR-----IIKD--
-----V-----
-----
-----EAKTMRLEEHGKVVLVLER-----T-----SQG
TG----PSRP-----PTPGRN-----R-YIVMSGTPEKI
LELLLEA-----MRPDSSAHDPT-ETF-----LS---D-
FLLTHSV--FM-----PTAQLCAALL----HHF-----H-
-----AEPA--GGSEQECSTYICNRRQQILRLVSQ
WVALYGPMLHTD-TVATSFLQ---KLSDL--VSRDA--RLSNLLR--EQ-WPERRR-H
HRL---ENGCGNA--SP---QMKAR-----NMP-----
----VW-----LPSQD-----EP-----
-----L-----
---PSSN-----
-----
-----
-----
-----CAIRVGDK--VP-----YD-----
ICRPDHSVLTQLPVTASVREVM-----ALAQEDG-----WT-----KGQ--VL
VKVNSA-----G-----DAVGLQPDARGVAASLGLNERLFVV
SPQE---V-HKLT-PHPEQL-----GP-----AVGSA
EG--LDLVSTKDLAQQLTDHDSLFNSIHQVELIH-----YVLGPQPL-RDVTTANLE
RFMR-----FNELQYWV-----ATELCLCPVPGLR-----AQLLRKFIKLAHL
-----KEQKNLNSFFAIMF-GLSNSAISRLAQTWE-----
-----RLPHKVRKLYSA-LERLL-----DPSWNH---
-RVYRL---ALTK-----LSPPLI-PFMP-----
LLLKDMTFIHEGNH--TL-VE-----N-LINFE-KM
-----RM--MARAAARMLHHCRRSHSS-----VPLSPLRS
RVSHLHEDSQATRISMCSQSLSTR-----S-----PASTWA-----YV
QQLKVIDNQREL-----SRLSREL
-----EP-----

```

-----  
---  
>Rapgef3\_[Bison\_bison\_bison]\_742108280  
-----  
-----MVGGVGQNSKE-----GPDWYAAAAA-GWRPLSAPDRQ  
APVKVFLS--LPRLIA--GAQHLRLTSPEDSKEVLLLGAAPCFGP-----AAPDPA  
SWL-----SAVLFPSQ-----VGWPGEG-----  
-----RWQVGLAVEG-DSILGAPPLGG---LPDVVPEGTLNLMVLRRMYRSRSCSYQ-L  
LLE-----HQRP-S-----CIQ-----  
-----GLR-----WT-----  
-----PLTSSEESLDFSV-SLEQA-----S-----V-----  
-----ERVL-----RA-----GKQLH-RHLLANC  
PN-L-----IRDRKYH-----L-RLH-----RQC-CS  
GR-----ELVDGILALG-----L  
----GVH-----SRSQAVGIC---QVLLDEGALC-----  
-----H-----VKH-DWAFQDRDTQFYRFPGP  
-----EPEP--VGVHEL-----  
-----  
-----EEEL-----VEALALLSQRGPDAL-----LTVALRKPPGQRT  
DEELD-----LIFEELLHIKAVAHLS-NSVKRELA-AVLLFEPHSGAGTVL-----  
-----FSQGDKG--TSWYIIW  
KGSVNVVTHGK----GL-----VTTLHEG-DDF  
GQLAL-----VNDAPRA---ATIILGEDNCHFLRVDKQDFNR-----IIKD--  
-----V-----  
-----  
-----EAKTMRLEEHGKVVLVLER-----T-----SQG  
TG-----PSRP-----PTPGRN-----R-YTVMSGTPEKI  
LELLLEA-----MRPDSSAHDPT-ETF-----LS---D-  
FLLTHSV--FM-----PTAQLCAALL---HHF-----H-----  
-----AEPA---GGSEQERSYICNKRQQILRLVSQ  
WVTLYGPTLRTD-PVATSFLK---KLSDL--VSRDT--RLSNLLR---EQ-WPERRR-H  
HRL---ENGCGNA--SP-----QMKVS-----DLP-----  
----FG-----PPARG-----EP-----  
-----L-----  
---PSSN-----  
-----  
-----  
-----CAIRVGDK--VP-----YD-----  
ICRPDHSMLETLQLPVTASVREVMA-----ALAQEDG-----WT-----KGQ--VL  
VKVNSA-----G-----DAIGLQPDARGVATSLGLNERLFVV  
NPQE---V-HELT-PHPDQL-----GP-----TVGSA  
EG--LDLVSTKDLAQQLTDHDWSLFNSIHQVELIH-----YVLGPQHL-RDVTANLE  
RFMR-----FNELQYWV-----ATELCLCSVPGLR-----AQLLRKFILKAAHL  
-----KEQKNLNSFFAIMF-GLSNSAISRLAHTWE-----  
-----RLPHKVRKLYSA-LERLL-----DPSWNH---  
-RVYRL---ALTK-----LSPPLI-PFMP-----  
LLLKDMTFIHEGNH--TL-VE-----N-LINFE-KM  
-----RM--MARAAARMHHCRRSHN-----VPLSPLRS  
RVSHLHEDSQAVRVSTCSEQSLSTR-----S-----PASTWA-----YV  
QQLKVIDNQREL-----SRLSREL  
-----EP-----



RFMR-----FNELQYVW----ATELCLCSVPGLR-----AQLLRKFIKLA AHL  
-----KEQKNLNSFFAIMF-GLSNSAISRLAHTWE-----  
-----RLPHKVRKLYSA-LERLL-----DPSWNH---  
-RVYRL---ALTK-----LSPPLI-PFMP-----  
LLLKDMTFIHEGNH--TL-VE-----N-LINFE-KM  
-----RM--MARAAARMLHHCRRSHN-----VPLSPLRS  
RVSHLHEDSQAVRVSTCSEQSLSTR-----S-----PASTWA-----YV  
QQLKVIDNQREL-----SRLSREL  
-----EP-----







```

-----EEEL-----VEALALLSQRGPDAL-----LTVALRKPPGQRT
DEELD-----LIFEELLHIKAVAHLS-NSVKRELA-AVLLFEPHSGAGTVL-----
-----FSQGDKG--TSWYIIW
KGSVNVVTHGK----GL-----VTTLHEG-DDF
GQLAL-----VNDAPRA---ATIILGEDNCHFLRVDKQDFNR-----I IKD--
-----V-----
-----EAKTMRLEEHGKVVLVLER-----T-----SQQ
TG----PSRP-----PTPGRN-----R-YTVMMSGTPBK
LELLLEA-----MRPDSSAHDPT-ETF-----LS---D-
FLLTHSV--FM-----PTAQLCAALL----HHF-----H-
-----AEPA--GGSEQERSSYVCNKRQQILRLVSQ
WVTLYGPTLR TD-PVATSFLK---KLSDL--VSRDA--RLSNLLR--EQ-WPERRR-H
HRL---ENGCGNA--SP-----QM KAR-----NVP-----
-----VW-----LPSQD-----EP-----
-----L-----
---PSSN-----
-----
-----CAIRVGDK--VP-----YD-----
ICRPDH SVLTLQLPV TASVREVMA-----ALA QEDG----WT-----KGQ--VL
VKVNSA-----G-----DAIGLPDARGVATSLGLNERLFVV
NPQE--V-QELT-PHPDQL-----GP-----TVGSA
EG--LDLVSTKDLAGQLTDHDWSLFNSIHQVELIH-----YVLGPQHL-RDVT TANLE
RFMRR-----FNELQYWV-----ATELC LCSVPLR-----AQ LLRKFIK LA AHL
-----KEQKNLNSFFAVMF-GLSNSAISRLAHTWE-----
-----RLPHKVRKLYSA-LERLL-----DPSWNH---
-RVYRL---ALTK-----LSPPLI-PFMP-----
LLLKDVT FIEGHNH--TL-VE-----N-LINFE-KM
-----RM--MARAA RMLHCHRSHSN-----VPL SPLRS
RVSH LHEDSQAVRVSTCSEQSLSTR-----S-----PASTWA-----YV
QQLKVIDNQREL-----SRLSREL
-----EP-----
-----
>Rapgef3_[Caenorhabditis_briggsae]_309361531
-----MERMSVRVRRLSPLHTFSDALL
ISLFS ESDFQPDNIQ--QGVVLF EKDEPTEYWYLLLSGEVQLYSKYTVSPSNFYLESSIF
VQVGDFKHLKTLRCGSLFGD--LSTL-THSCSCL-VSRPAQLIKIAQNHF LSVYN-----
KHGD--HLQPFIIMHDILT-----
-----DE--TPMDPO--LPM-----HSSGLFNGORS-----

```

NDLM-----SSEINPN-----EIVSVSTEGIPTKMILPSLPHRRN-RSH-----  
 ---RPNQLNHNQNRTE-----  
 --DRN---FIEFHNPTGIEKQVLES-----GEVLH-RKMLTDN  
 HQ-V-----IRDITTQ-----HTVIFFRSSQSEYLNQFQVQNC-MI  
 GA-----EMIDWLLTLF-----  
 ---VST--STTSSSLSRIQMSAIW--QVLLNNGMIA-----  
 -----H-----IDG-EHEFMDKTNSEYRQVQ  
 Y-----RNRN---KV-----  
 -----  
 -----APTIEEV-----SKSTALLSSIAPETL-----FLMIVSKPGFERS  
 PEELE----VVEEELTFIKALSHLS-TMVKRQLA-NFVKVEQYIHAGSVV-----  
 -----FRQREIG--VYWYIVL  
 KGAVEVNVNGK-----V-----VCILREG-DDF  
 GKLAL-----VNDLPRA--ATIVTYEDDSIFLVVDKHHFNQ-----ILHQ--  
 -----V-----  
 -----  
 -----EANTVRLKDYGEDVLVLEK----VDI-----  
 -----P-----RGAALN-----SNSCNFNCG--YSVMAGKAEKI  
 LEYVLET-----RIDA-----LSDDI--SEIDLFE---D-  
 FILTHDA--FM-----PANTVCNFKL-----S-----  
 -----YYFR-T-----PYRAT-----RD--SIT-DSCTEEVRCKKRQVQFVYI  
 WCSMLKINFFLN-PVTNSFVE---ELFCH--VIDDR-----KRL-----GGMEEI-  
 -----  
 -----MTRIGAIRT-SRENMQLVL-----  
 ---AR-----HPAI-----VLDCGVLSAR  
 T--PCP-----  
 -----  
 -----  
 -----ILPSDV--CN-----QI  
 IYLADTTCTFVLPPIRVDKTAEIICE-----LSRRR-----MSFSA--EPLKL  
 VEVKSN-----GEKLI-----FSPTDRAIPTVLSLNSKLYVV  
 NREE--I-PMLV-PMEDQ-----NGP-----TPTH  
 SS-ILHLIDSQELAHQLFLFHLQLLRATDSNELLY-----QVIGRESF-PQSMFNLNLD  
 LLVRR-----FNEVQHWS-----TTEILLA-TEDNR-----VEILKKFIHIATML  
 VKNETEWFEFENIFYRAREYRDLLTVFAITL-GLSHTSVSRLTLTN-----  
 -----KLPPATFKTFSE-LENLL-----DPTRNH--  
 -RMYRL---LVSK-----IATPYI-PFVP-----  
 LILKDLMFHQQGNK--SF-YN-----G-LVNFE-KM  
 -----HM--FAKIFRNFRQCKS--H-----MNDT-----T--  
 -----DHQY-----V-----EPQS-----LI  
 RNLRLVIDNQKIL-----IQLSYGI  
 -----EPKT-----AKRTVTKEIENNGKRAIDSICC-----

-----  
---  
>Rapgef3\_[Caenorhabditis\_remanei]\_308501823  
-----  
-----MCHIQMERMVSRVRRLSPLHTFSDALL  
ISLLSESDFQPDNIQ--QGVVLFKDEPTEYWYLLLSGEVQLYSKNYV-----  
---GDFKHLKTLRCGSLFGD--LSTT-THSCSCL-VSRPAQLIRISQNHFLSVYNFLEFQ  
KHGD--HLQQFIIIMHDILT-----  
-----DE--TPMDP---IPT-----YSSGLFNGQRS-----  
NDLM-----TSEINPN-----EIVSVSTEGIPTKMILPSIPYRRDKVKNN-----  
---RPVT---QKTVE-----  
--ERN---FIEFHNPTRIEKEIIES-----GGTLH-RKMLTDN  
HQ-V-----IRDITTQ-----HT-----RVQNC-MI  
GA-----EMIDWLLTLF-----  
---VST--STTSSSLSRIQMSAIW---QVLLNYGIIA-----  
-----H-----IDG-EHQFMDKTNSYYRWVQP  
Y-----RNRN---KV-----  
-----  
-----APTMEEV-----LKSISLLSSVAPETL-----FLMIVSKPGFERS  
PEELE-----VVYEELTFIKALSHLS-TMVKRQLA-NFVKVEQFVHAGSVV-----  
-----FRQGEIG--VYWYIVL  
KGAVEVNVNGK-----V-----VCVLREG-DDF  
GKLAL-----VNDLPRA---ATIVTYEDDSIFLVVDKHNFNQ-----ILHQ--  
-----V-----  
-----  
-----EANTVRLKDYGEDVLVLEK-----VDI-----  
-----P-----RGAALN---SSFSSLNCG---YSVMAGKAEKI  
LEYVLET-----RIDA-----LSDDI---SELDLFVE---D-  
FILTHDA--FM-----PDNTVCNFLK---T-----  
-----YYFR-T-----PYRAT-----RD---SIS-DSCTEEVRCKRRVVQFVYI  
WCRMLKINFFLN-PVTNSFVE---ELFCH--VIDDR-----KRL-----GGMEEI-  
-----  
-----MTRIGAIRT-SRENMQLVL-----  
---AR-----HPAI-----VLDCGVLSAH  
T--PCP-----  
-----  
-----  
-----  
-----ILPSDV--CN-----QI  
IYLADTTCTFVLPIRVDKTAE EICE-----LSRRR-----MSFSA--EPLNL  
VEVKSN-----GEKLI-----FSPNDRAIPTVLSLNSKLYVV  
NREE---I-PLLV-PMEDQ-----NGP-----TPSSH  
SS-ILHLIDSQELAHQLFLFHLQLLRATDSNELLY-----QVIGRESF-PLSMPFNLD  
LLVRR-----FNEVQHWS-----TTEILLA-SEENR-----VEILKKFIAIATI-  
-----AREYRDLLTVFAITL-GLSHTSVSRLTLTWS-----  
-----KLPPITLKTSE-LEHLL-----DPTRNH---  
-RMYRL---MVSF---MASPYI-PFVP-----  
LILKDLMFHIGQNK--SF-YN-----G-LVNFE-KM  
-----HM--FAKIFRNFQCKS--Q-----MNDS-----S--  
-----DHEY-----V-----EPQS-----LI  
RNLRVIDNQKKL-----MQISYEI  
-----EPKT-----TRRNI-----GFH-----



RFMRR-----FNQLQYWV-----ATELCCLCVAPGPR-----AQLLRKFIKLA AHL  
-----KEQKNLNSFFAVMF-GLSNSAISRLAHTWE-----  
-----RLPHKVRKLYSA-LERLL-----DPSWNH---  
-RVYRL---ALAK-----LSPPVI-PFMP-----  
LLLKDMTFIHEGNH--TL-VE-----N-LINFE-KM  
-----RM--MARASRMLHHCRSHNP-----VPLSPLRS  
RVSHLHEDSQVARISTCSEQSLSTR-----S-----PASTWA-----YV  
QQLKVIDNQREL-----SRLSREL  
-----EP-----

---  
>Rapgef3\_[Callorhinchus\_milii]\_632985555





G-----QA-----GTGRGTGAL-----A-TR-YFVVAGTPEKI  
LEHLLLEF-----MRLDATLYDPV-D-----TLLG---D-  
FLLTYTL--FM-----TTSQLCRALL----HHF-----R-----  
-----AEPL--GSQQEKVTFSLKRRKILRLVSQ  
WVLLYGRVLQGD-LSTSLQ-----

-----PRT-----

SGSWLGVQDE-TLPSS-----  
-----C-----ILRAQDR  
---VPYEIY-RPDHSLVTPLPINASVRDILGSLAPQLPPGREHLLVKDPSWNHRVYRLA  
VAKLSPPPLIPFVPLLLKGSELSSLSLRSSLSWDFPPLGAIDRQQELLRLSRELEP----

```
>Rapgef3_[Camelus_bactrianus]_743736343
```

```

-----K-----VGWPGES-----
----RWQVGLAVED-GSALGAPPVGG----LPDVVPEGTLLNMVLRMHLPSCSYQ-L
LLE-----HQRP-S-----RIQ-----
-----GLR-----WT-----
----PLTSSEESLDFSV-SLEQA-----S-----T-----
----ERVL-----RA-----GKQLH-RHLLANC
PN-L-----IRDRKYH-----L-RLH-----RQC-CS
GR-----ELVDGILALG-----L-----
----GVH-----SRSQAVGIC--QVLLDEGALC-----
-----H-----VKH-DWAFQDRDTQFYRFPGP
----EPEP--AGTHEL-----

```

```

-----EEEL-----VEALALLSQRGPDAL-----LTVALRKPPGQRT
DEELD-----LIFEELLHIKAVAHLS-NSVKRELA-AVLLFEPHNKAGTVL-----
-----FSQGDKG--TSWYIIW
KGSVNVVTHGK-----GL-----VTTLHEG-DDF
GQLAL-----VNDAPRA---ATIIILREDNCHFRLVDKQDFNR-----I IKD--
-----V-----
-----EAKTMRLEEHGKVVLVLER-----N-----SQQ
AG----PSRP-----PTPGRN-----R-YTVMMSGTPBK
LELLLEA-----MRPDSSAHDPT-ETF-----LS---D-
FLLTHTV--FM-----PSTQLCAALL-----HHF-----H-
-----AEPA--GGNEQECSTYVCNKRQQILRLVSQ
WVALYGPM LHTD-PVATSFLQ---KLSEL--VSRDA--RLSNLLR--EQ-WPERRR-H
HRL---ENGCGNA--SP-----QM KAR-----NMP-----
-----VW-----LPSQD-----EP-----
-----L-----
---PSSN-----
-----
-----CAIRVGDK--VS-----YD-----
ICRPDH SVLTLQLPV TASVREVMA-----ALA QEDG----WT-----KGQ--VL
VKVNSA-----G-----DAIGLPDARGVATSLGLNERLFVV
NPQE--V-HKLT-PHPEQL-----GP-----TVGSA
EG--LDLVSTKDLAQ L TDHDWNLFNSIHQVELIH-----YVLGPQHL-RDVT TANLE
RFMRR-----FNELQYWV-----ATELC LCPVP GLR-----AQLLRKF I KLA AHL
-----KEQKNLNSFFAIMF-GLSNSAISRLAHTWE-----
-----RLPHKVRKLYSA-LERLL-----DPSWNH--
-RVYRL---ALTK-----LSPPVI-PFMP-----
LLLKDMTFIHEGNH--TL-VE-----N-LINFE-KM
-----RM--MARAA RMLHHC RS HSN-----VPLSPLRS
RVSH LHEDSQA TRISTCSEQSLITR-----S-----PGSTWA-----SI
QQLKVIDNQREL-----SRLSREL
-----EP-----
-----
>Rapgef3_[Camelus_dromedarius]_744616231
-----M-----
-----K-----VGWPGES
-----RWQVGLAVED-GSALGAPPVGG---LPDVVPEG TLLNMVLR RMHLPRSCSYQ-L
LLE-----HORP-S-----RIO-----

```

```

-----GLR-----WT-----
-----PLTSSEESLDFSV-SLEQA-----S-----T-----
-----ERVL-----RA-----GKQLH-RHLLANC
PN-L-----IRDRKYH-----L-RLH-----RQC-CS
GR-----ELVDGILALG-----L
----GVH-----SRSQAVGIC---QVLLDEGALC-----
-----H-----VKH-DWAFQDRDTQFYRFPGP
-----EPEP--AGTHEL-----
-----
-----EEEL-----VEALALLSQRGPDAL-----LTVALRKPPGQRT
DEELD----LIFEELLHIKAVAHLS-NSVKRELA-AVLLFEPHSKAGTVL-----
-----FSQGDKG--TSWYIIW
KGSVNVVTHGK----GL-----VTTLHEG-DDF
GQLAL-----VNDAPRA--ATIILREDNCHFRLVDKQDFNR-----IIKD--
-----V-----
-----
-----EAKTMRLEEHGKVVLVLER-----N-----SQG
AG----PSRP-----PTPGRN-----R-YTVMSTGTPPEKI
LELLLEA-----MRPDSSAHDPT-ETF-----LS---D-
FLLTHTV--FM-----PSTQLCAALL----HHF-----H-
-----AEPA--GGNEQECSTYVCNKRQQILRLVSQ
WVALYGPMLHTD-PVATSFLQ---KLSEL--VSRDA--RLSNLLR--EQ-WPERRR-H
HRL---ENGCGNA--SP---QMKAR-----NMP-----
----VW-----LPSQD-----EP-----
-----L-----
---PSSN-----
-----
-----
-----
-----CAIRVGDK--VP-----YD-----
ICRPDHSVLTQLPVTASVREVM-----ALAQEDG-----WT-----KGQ--VL
VKVNSA-----G-----DAIGLQPDARGVATSLGLNERLFVV
NPQE---V-HKLT-PHPEQL-----GP-----TVGSA
EG--LDLVSTKDLAQQLTDHDWNLFNSIHQVELIH-----YVLGPQHL-RDVTTANLE
RFMR-----FNELQYWV-----ATELCLCPVPGLR-----AQLLRKFIKLAHL
-----KEQKNLNSFFAIMF-GLSNSAISRLAHTWE-----
-----RLPHKVRKLYSA-LERLL-----DPSWNH---
-RVYRL---ALTK-----LSPPVI-PFMP-----
LLLKDMTFIHEGNH--TL-VE-----N-LINFE-KM
-----RM--MARAAARMLHHCRRSHN-----VPLSPLRS
RVSHLHEDSQATRISTCSEQSLITR-----S-----PGSTWA-----SI
QQLKVIDNQREL-----SRLSREL
-----EP-----

```

-----  
---  
>Rapgef3\_[Camelus\_ferus]\_946669812  
-----  
-----M-----  
-----  
-----K-----VGWPGES-----  
-----RWQVGLAVED-GSALGAPPVGG-----LPDVVPEGTLLNMVLRMHLPRSCSYQ-L  
LLE-----HQRPSXXLEHQPSRIQ-----  
-----GLR-----WT-----  
-----PLTSSEESLDFSV-SLEQA-----S-----T-----  
-----ERVL-----RA-----GKQLH-RHLLANC  
PN-L-----IRDRKYH-----L-RLH-----RQC-CS  
GR-----ELVDGILALG-----L  
-----GVH-----SRSQAVGIC---QVLLDEGALC-----  
-----H-----VKH-DWAFQDRDTQFYRFPGP  
-----EPEP--AGTHEL-----  
-----  
-----EEEL-----VEALALLSQRGPDAL-----LTVALRKPPGQRT  
DEELD-----LIFEELLHIKAVAHLS-NSVKRELA-AVLLFEPHNKAGTVL-----  
-----FSQGDKG--TSWYIIW  
KGSVNVVTHGK-----GL-----VTTLHEG-DDF  
GQLAL-----VNDAPRA---ATIILREDNCHFLRVDKQDFNR-----I IKD--  
-----V-----  
-----  
-----EAKTMRLEEHGKVVLVLER-----N-----SQG  
AG-----PSRP-----PTPGRN-----R-YTVMSGTPEKI  
LELLLEA-----MRPDSSAHDPT-ETF-----LS---D-  
FLLTHTV--FM-----PSTQLCAALL---HHF-----H-----  
-----AEPA---GGNEQECSTYVCNKRQQIILRLVSQ  
WVALYGPM LHTD-PVATSFLQ---KLSEL--VSRDA--RLSNLLR---EQ-WPERRR-H  
HRL---ENGCGNA--SP-----QMKAR-----NMP-----  
-----VW-----LPSQD-----EP-----  
-----L-----  
---PSSN-----  
-----  
-----  
-----CAIRVGDK--VS-----YD-----  
ICRPDHSVLTQLPVTASVREVMA-----ALAQEDG-----WT-----KGQ--VL  
VKVNSA-----G-----DAIGLQPDARGVATSLGLNERLFVV  
NPQE---V-HKLT-PHPEQL-----GP-----TVGSA  
EG--LDLVSTKDLAQQLTDHDWNLFNSIHQVELIH-----YVLGPQHL-RDVTTANLE  
RFMR-----FNELQYWV-----ATELCLCPVPGLR-----AQLLRKFIKLAAHL  
-----KEQKNLNSFFAIMF-GLSNSAISRLAHTWE-----  
-----RLPHKVRKLYSA-LERLL-----DPSWNH---  
-RVYRL---ALTK-----LSPPI-PFMP-----  
LLKDMTFIHEGNH--TL-VE-----N-LINFE-KM  
-----RM--MARAARMLHHCRRSHN-----VPLSPLRS  
RVSHLHEDSQATRISTCSEQSLITR-----S-----PGSTWA-----SI  
QQLKVIDNQREL-----SRLSREL-----  
-----EP-----

```

-----
-----
-----
-----
-----
-----
-----
-----
-----
-----
----
>Rapgef3_[Canis_lupus_familiaris]_153791885
-----
-----
-----
-----
-----
-----MVLKRMHRPRSCSYQ-L
LLE-----HQRP-S-----RIQ-----
-----GLR-----WT-----
-----PLTDSEESLDFSE-SLEQA-----S-----T-----
-----ERVL-----RA-----GKQLH-RHLLATS
PT-L-----IRDRKYH-----L-RLY-----RQC-CS
GR-----ELVDGILALG-----L
---GVH-----SRSQAVGIC--QVLLDEGALC-----
-----H-----VKH-DWTFQDRDTQFYRFPGP
-----EPEP--AGVHEL-----
-----EEEL-----VEAVALLSQRGPDAL-----LTVALRKPPGQRT
DEELD----LIFEELLHIKAHAHLNSSVKRELA-AVLLFEPHSKAGTVL-----FSQGDKG--TSWYIIW
KGSVNVTTHGK----GL-----VTTLHEG-DDF
GQLAL-----VNDAPRA--ATIILREDNCHFLRVDKQDFNR-----I IKD--
-----V-----
-----
-----
-----EAKTMRL EEHGKVVLVLER-----A-----SQG
AG-----PSRP-----PTPGRN-----R-YTVMMSGTPEKI
LELLLEA-----MRPDSSAHDP TETF-----LS--D-
FLITYSV--FM-----PSAQLCAALL-----HHF-----H-----
-----AEPS---GGSEQEHSTYICNK RQQILRLVSQ
WVALYGPMLYTD-PVATGFLQ---KLSDL--VSRDT--RLCILLR---EQ-WPERRR-H
HRL---ENGCGNA--SP---QM KAR-----NMP-----
---VW-----LPGQD-----QP-----
-----L-----
---LCSN-----
-----
-----
-----RAIRVGDK--VP-----YD-----
ICRPDH SVLTLKLPVTASVREVMA-----ALA QEDG-----WT-----KGQ--VL
VKVNSA-----G-----DAIGLQPDARGVATSLGLNERLFVV
NPQE--V-HELT-PHQEQL-----GP-----TVGSA
EG--LDLVSAKDLAGQLTDHDWNLFNSIHQVELIH-----YVLGPQHL-RDVT TANLE

```





```
AG-----PSRP-----PTPGRN-----R-YTVMMSGTPEKI  
LELLLLLEA-----MRPDSSAHDP-ETF-----LS---D-  
FLLTHSV--FM-----PSAQLCTALL----HHF-----H-----  
-----AEPA---GSCEQERSTYICNKRQQILRLVSO  
WVALYGSM LHTD-PVATTFLQ---KLSDL-VSRDT--RLSNLLR---EQ-WPEKRR-H  
HRL---ENG YGNA--SP---QM KAR-----NMP-----  
----IW-----LPGQD-----EP-----  
-----L-----  
---PSGN-----  
  
-----SAIRVGDK--VP-----YD-----  
ICRPDH SVLT LQLPV TASVRE VMA-----ALAQENG---WT-----KGQ--VL  
VKVNSA-----G-----DAIGLPDARG VATSLGLNERLFVV  
SPQE--V-HELT-PHP EQL-----GP-----TVGSA  
EG--LDLVSAKDLAGQLTDHDWSLFNSIHQVELIH-----YVLGPQHL-RDVT TANLE  
RFMRR-----FNELQYWV-----ATELCCLCPVPGPR-----VQLLRKF I KLA A HL  
-----KEQKNLNLSFFAIMF-GLSNSAISRLAHTWE-----  
-----RLPHKVRKL YSA-LERLL-----DPSWNH---  
-RVYRL---ALAK-----LSPPVI-PFMP-----  
LLLKDMTFIHEGNH--TL-VE-----N-LINFE-KM  
-----RM--MARAVRMLHHC RGHST-----VPLSPLRS  
RVSH LHEDSQAARISTCSE QSLSTR-----S-----PASTWA---HV  
QQLKV IDNQREL-----SRLSREL-----  
-----EP-----
```



[illegible]

```

-----GLR-----WT-----
-----PLTDSEESLDFSV-SLEQA-----S-----T-----
-----ERVL-----RA-----GKQLH-RHLLATC
PN-L-----IRDRKYH-----L-RLH-----RQC-CS
GR-----ELVDGILALG-----L
----GFH-----SRSQAVGIC---QVLLDEGALC-----
-----H-----VKH-DWTFQDRDQTQFYRFPGP
-----EPEP--AGLHEL-----
-----
-----EEEL-----VEAMALLSQRGPDAL-----LTVALRKPPGQRT
DEELD----LIFEELLHIKAVAHLS-NSVKRELA-AVLLFEPHSKAGTVL-----
-----FSQGDKG--TSWYIIW
KGSVNVVTHGK----GL-----VTTLHEG-DDF
GQLAL-----VNDAPRA--ATIILREDNCHFRLRVDKQDFNR-----IIKD--
-----V-----
-----
-----EAKTMRLEEHGKVVLVLER-----T-----SQG
AG----PSRP-----PTPGRN-----R-YTVMSTGTPPEKI
LELLLEA-----MRPDSSAHDPT-ETF-----LS---D-
FLLTHSV--FM-----PSTQLCAALL----HHF-----H-
-----AEPA--GGSEQECSTYICNKRQQILRLVSQ
WVALYGPMLHND-PVATSFLQ---KLSDL--VSRDA--RLSNLLR--EQ-WPERRR-H
HRL---ENGCGNA--SP---QMKAR-----NIP-----
----VW-----LPSQD-----EP-----
-----L-----
---PSSN-----
-----
-----
-----
-----CAIRVGDK--VP-----YD-----
ICRPDHSVLTLLRLPVTASVREVM-----ALAQEDS-----WT-----KGQ--VL
VKVNSA-----G-----DAVGLQPDARGVATSLGLNERLFVV
NPQE---V-HELT-PHPEQL-----GP-----TMGSA
EG--LDLVSAKDLAQQLTDHDSWLFNSIHQVELIH-----YVLGPQHL-RDVTTANLE
RFMR-----FNELQYWV-----ATELCLCPVPGPR-----AQLLRKFIKLAHL
-----KEQKNLNSFFAVMF-GLSNSAISRLAHTWE-----
-----RLPHKVRKLHSA-LERLL-----DPSWNH---
-RVYRL---ALTK-----LSPPII-PFMP-----
LLLKDMTFIHEGNH--TL-VE-----N-LINFE-KM
-----RM--MARAVRMLHHCRRSHSS-----VPLSPLRS
RVSHLHEDGQAARISTCSEQSLSTR-----S-----PASTWA-----YV
QQLKVIDNQREL-----SRLSREL
-----EP-----

```

-----  
---  
>Rapgef3\_[Cercocebus\_atys]\_795538398  
-----

-----M-----  
-----K-----VGWPGES-----  
-----CWQVGLAVED-SPALGAPRVGP-----LPDVVPEGTLTLDMLRKMHRPRSCSYQ-L  
LLE-----HQRPS-----CIQ-----  
-----GLR-----WT-----  
-----PLTNSEESLDFSE-SLEQA-----S-----T-----  
-----ERVL-----RA-----GRQLH-RQLLATC  
PN-L-----IRDRKYH-----L-RLY-----RQC-CS  
GR-----ELVDGILALG-----L  
-----GVH-----SRSQVVGIC---QVLLDEGALC-----  
-----H-----VKH-DWAFQDRDAQFYRFPGP  
-----EPEPEPVGAHEM-----  
-----EEEL-----AEAVALLSQRGPDAL-----LTVALRKPPGQRT  
DEELD-----LIFEELLHIKAVAHLS-NSVKRELA-AVLLFEPHSGAGTVL-----  
-----FSQGDKG--TSWYIIW  
KGSVNVVTHGK-----GL-----VTTLHEG-DDF  
GQLAL-----VNDAPRA---ATIILREDNCHFLRVDKQDFNR-----IIKD--  
-----V-----  
-----EAKTMRLEEHGKVVLVLER-----A-----SQG  
AS-----PSRP-----PTPGRN-----R-YTVMSGTPEKI  
LELLLEA-----MGPDSSAHDPT-ETF-----LS---D-  
FLLTHRV--FM-----PSAQLCAALL---HHF-----H-----  
-----AEPA---GGSEQERSTYICNKRQQILRLVSQ  
WVALYGSMLHTD-PVATSFLQ---KLSDL--VGRDA--RLSNLLR---EQ-WPERRR-H  
HRL---ENGCGNA--SP---QMKAR-----NLP-----  
-----VW-----LPNQD-----EP-----  
-----L-----  
---PGSS-----  
-----CAIRVGDK--VP-----YD-----  
ICLPDHSVLTQLPVTASVREVMA-----ALAQEDG-----WT-----KGQ--VL  
VKVNSA-----G-----DAIGLQPDARGVATSLGLNERLFVV  
NPQE---V-HELT-PHPDQL-----GP-----TVGSA  
EG--LDLVSAKDLAQQLTDHDWSLFNSIHQVELIY-----YALGPQHL-RDVTTANLE  
RFMR-----FNELQYWV-----ATELCLCPVPGPR-----AQLLRKFIKLAAHL  
-----KEQKNLNSFFAVMF-GLSNSAISRLAHTWE-----  
-----RLPHKVRKLYSA-LERLL-----DPSWNH---  
-RVYRL---ALAK-----LSPPVI-PFMP-----  
LLLKDMTFIHEGNH--TL-VE-----N-LINFE-KM  
-----RM--MARAARMLHHCRRSHNP-----VPLSPLRS  
RVSHLHEDSQVARISTCSEQSLSTR-----S-----PASTWA-----YV  
QQLKVIDNQREL-----SRLSREL  
-----EP-----

```
>Rapgef3_[Charadrius_vociferus]_699656507
```



-----VP-----YD-----  
VYRADHSCLTVVLPVNASVRDVLQ-----SLAHREG-----GHGE-RML  
VKVNSA-----GDKAG-----LQMDTISVYTSLGLNERLFVV  
NVQE---L-HTLT-PHPEQL-----GP-----TVGSS  
ET--LDLISSKDLASQLTDYDWNLFSSVHQVELIY-----YTFGQQTF-PSATTANLE  
RVMRR-----FNELQYWI-----ATELCLCAEPGKR-----AQLLRKFIKLA AHL  
-----KEQKNLNSFFAVMF-GLSNTSVSRLSKTWE-----  
-----RLPHKTRKLHSA-LERML-----DPSWNH---  
-RVYRL---AIAK-----LTPPII-PFMPL-LLK-----  
----DMTFIHEG NR--TLA-----EN-LINFE-KM  
-----RM--MAKAVRIIHHSQS--HT-----YGPISPLRS  
RPPQLLEDPQALRIST-----  
-----C-----SEQSLSG  
RSPAPTQAY-LQHLKVIDNQKELSRLSRDLES-----

---  
>Rapgef3\_[Chinchilla\_lanigera]\_533187398

-----M-----  
-----K-----VGWPGES---  
----RWQLGPAVEE-SLVLGVPVAVGG---LPDVLPEGTLLDMVLRRVHRPRSCSYQ-L  
LLQ-----HPRP-S-----RIQ-----  
-----GLR-----WT-----  
----PLTNGEESLDFSE-SLEQA-----S-----A-----  
----ERVL-----RA-----GRHLH-RHLLAAC  
PT-L-----IRDRKHH-----L-RLH-----RQC-CS  
GR-----ELVDGILALG-----L  
----GVH-----SRSQAVGIC---QVLLDEGALC-----  
-----H-----VRH-DWTFQDRDAQFYRFLGP  
-----EPEP--AGTHEL-----  
-----EEEL-----VEAMALLSQRGPDAL-----LTVALRKPPGQRL  
DEELD----LIFEELLHIKAVAHLS-NSVKRELA-AVLLFESHKAGTVL-----  
-----FSQGDKG--TSWYIIW  
KGSVNVVTHGK----GL-----VTTLHEG-DDF  
GQLAL-----VNDAPRA--ATIILREDNCHFLRVDKQDFNR-----IIKD--  
-----V-----  
-----EAKTMRLEEKGKVVVLVLER-----T-----SQG

```

AG-----PSRP-----PTPGRN-----R-YTVMMSGTPEKI
LELLLLLEA-----MRPDSSAHDPT-ETF-----LS---D-
FLLTHSV--FM-----PTAQLCAALL----HHF-----H-----
-----AEPAEAAGGGELEHSSYICNRRQQILRLVGR
WVALYSPMLHKD-PVATSFLQ---KLSDL--VSRDA--RLSHLLR---EQ-WPERRR-H
HRL---ENGCGSA--SP---QLKAR-----NVP-----
----VW-----LPSQD-----EP-----
-----L-----
---PSSS-----
-----
-----
-----
-----
-----CAIRVGDK--VP-----YD-----
ICRPDHSVLTQLQLPVTASVREUMA-----ALAQEDG---WT-----KGQ--VL
VKVNST-----G-----DAVGLQPDARGVATSLGLNERLFFV
TPQE--V-HKLT-PHPEQL-----GP-----AVGSA
EG--LDAVSARDLAGQLTDLDWSLFNSIHQVELIH-----YVLGPQRL-RDGTANLE
RFMR-----FNELQFWV-----ATELCLCPAPGLR-----AQLLRKFIKLAHL
-----KEQKNLNSFFAIMF-GLSNSAISRLAHTWE-----
-----RLPHKVRKLYSA-LERLL-----DPSWNH---
-RVYRL---ALSK-----LSPPLI-PFMP-----
LLLKDMTFIHEGNR--TL-VE-----N-LINFE-KM
-----RM---MARAAALLHRCRSHGA-----VPLSPLRS
RVSHLHEDSQASRVSTCSEQSLSTR-----S-----SASTWA-----YV
QQLKVIDNQREL-----SRLSREL-----
-----EP-----

```

```
>Rapgef3 [Chlorocebus sabaeus] 635064864
```





PRIQG-----IRW-----T-----  
 -----PLPD-----SESAPDCGQ-----SLTQAH--A-----  
 -----EKVW-----RAGRLLY-----S--H--LVSSC  
 PG-L-----IRDHKYH-----L-RHH-----RHC-CS  
 GK-----ELVDWLLSAG-----L  
 ----SIQ-----MRGQAIGVC--QVLVDGGVLT-----  
 -----H-----VKQ-EWHFQDKDAQFYRFAEG  
 E-----LTLEP--GTWDT-----  
 -----  
 -----EEL-----LEALVFLAQLGPDAL-----LTMALRKP-----  
 -----AKGCLS-LQVKRELA-SVLLFESHPKAGTV-----  
 -----LFSQGDKG--TSWYIIW  
 KGSVNVVTHGK----GL-----VTTLHEG-DDF  
 GQLAL-----VNDAPRA--ATIILREDNCHFLRVDKRDFNR-----ILKD--  
 -----V-----  
 -----  
 -----EANTMRLKEHGKVVVLVEKNL-----QG  
 SG---SSNQS-----PSAGSS-R-----YSVMAGTPDKI  
 LEHLLEA-----MRLDATFSDPL-D-----TLVG---D-  
 FLLTYNV--FM-----PTTQFCRALL-----HHF-----H-----  
 -----AEPSE--GSEQEKAVYSLSKRQKIVRLVSQ  
 WVLLYGSLQAE-HCAITLLQ---NLSD--FVSRDP--RLCNLLR--DQ-TQDRRR-  
 NRT--LENGGSA--SP-----QSKVRS-----TVN-  
 ----W-----IASLE-----DA-----  
 -----TL-----  
 ----NNSC-AI-----GAQDK-----  
 -----  
 -----  
 -----VP-----YD-----  
 VYRADHSCLTVVLPVNASVRDLQ-----SLTRQEG-----GHGE-RML  
 VKVNSA-----GDKAG-----LQMDTIGVFTSLGLNERLFFV  
 NVQE---L-HTLT-PHPEQL-----GP-----TVGSS  
 ET--LDLISSKDLASQLTDYDWNLFSSVHQVELIY-----YIFGQQT-PSATTANLE  
 RVMRR-----FNELQYWI-----ATELCLCAEPGR-----AQLLRKFIKLAHL  
 -----KEQKNLNSFFAVMF-GLSNTAVSRLAKTWE-----  
 -----RLPHKTRKLHSA-LERML-----DPSWNH--  
 -RVYRL---AIAK-----LTPPII-PFVPL-LLK-----  
 ----DMTFIHEGNR--TLA-----EN-LINFE-KM  
 -----RM--MAKAVRIIHHCQS--HT-----YAPMSPLRS  
 RAPQLLEDPPQALRIST-----  
 -----C-----SEQSLCG  
 RSPASTRAY-LQHLKVIDNQKELSRLSRDLES-----

-----  
---  
>Rapgef3\_[Chrysochloris\_asiatica]\_586469584  
-----  
-----  
-----  
-----  
-----MVLRRMHRPRSCSYQ-L  
LLE-----HQRP-S-----RIQ-----  
-----GLR-----WT-----  
-----PLTDSEESLDFSM-SLEQA-----S-----T-----  
-----ERVL-----RA-----GKQLH-RHLLATC  
PN-L-----IRDRKYH-----L-RLY-----RQC-CS  
GR-----ELVDGIFALG-----L  
-----GVH-----SRSQAVGIY---QVLLDEGALC-----  
-----H-----VKH-DWTFQDRDAQFYRFPGP  
-----EPEP--VKAHEM-----  
-----  
-----GEEL-----VEAMALLSQRGPDAL-----LTVALRKPPGQRT  
DEELD-----LIFEELLHIKAVAHLS-NSVKRELA-AVLLFEPHSGAGTVL-----  
-----FSQGDKG--TSWYIIW  
KGSVNVVTHGK-----GL-----VTTLHEG-DDF  
GQLAL-----VNDAPRA---ATIILREDNCHFLRVDKQDFNR-----IIKD--  
-----V-----  
-----  
-----EAKTMRLEEHGKVVLVLER-----A-----SQG  
TG-----PSHL-----PTPGRN-----R-YTVMSGTPEKI  
LELLLEA-----MQPDSSAHDPT-ETF-----LS---D-  
FLLTHSV--FM-----PSTQLCASLL---HHF-----H-----  
-----AVPA---GGNEQERSTYVCNKRQQIILRLVSQ  
WVALYGPMLRTD-PVATSFFQ---KLSDL--VSRDA--RLSNLLK---EQ-WPERRR-H  
HRL---ENGCGNA--SP-----QMKAR-----NVP-----  
-----AW-----LPTQD-----EP-----  
-----L-----  
-----SNN-----  
-----  
-----  
-----  
-----CSIRVGDK--VP-----YD-----  
ICRPDHSVLSLQLPVTASVREVMA-----ALAQEDG-----WT-----KGQ--VL  
VKVNSA-----G-----KAIGLQPEARGVATSLGLNERLFVV  
NPQE---V-HELT-PHPEQL-----GP-----TMGSA  
EG--LDVVSADLAGQLTDHDWNLFHSIHQVELIH-----YVLGPQHL-RTVTTANLE  
RFLRR-----FNELQYWV-----ATELCLCPVPSLR-----AQLLRKFIKLAAHL  
-----KEQKNLNSFFAIMF-GLSNSAISRLAHTWE-----  
-----RLPHKVRKLYSA-LERLL-----DPSWNH---  
-RVYRL---ALTK-----LSPPII-PFMP-----  
LLLKDMTFIHEGNH--TL-VE-----N-LINFE-KM  
-----RM--MARAVRMLHQCRSHSN-----VPLSPLRS  
RVSHLHEDSQAVRISTCSEQSLSTR-----S-----PASTWA-----YV  
QQLKVIDNQREL-----SRLSREL  
-----EP-----



RFMR-----FNEVQYVW----VTELCCLVDLAKR-----AALLKKFIKMAIVL  
-----KEQKNLNSFYAVMF-GLTNSAVTRLYKTWE-----  
-----RVPNKTRIFTT-YERIL-----DPARNH---  
-RAYRL---AVVK-----LSPPYI-PFMP-----  
LILKDMTFIHEGNK--NY-TN-----T-LVNFE-KM  
-----RM--IARTLKIVTGCNRQSYS-----VPSSPQKG  
MTERMFLTPAIRLSTYSEQSLTLR-----S-----TSNIRH----YV  
QNLKVIDNQRL-----TQMSRDI  
-----ER-----

```

-----M-----
-----K-----VGWPGES-----
-----CWQVGLAVED-SPALGAPRVGA----LPDVVPEGTLLNMVLRKMHPRSCSYQ-L
LLE-----HQRP-S-----CIQ-----
-----GLR-----WT-----
-----PLTNSEESLDFSE-SLEQA-----S-----T-----
-----ERVL-----RA-----GRQLH-RQLLATC
PN-L-----IRDRKYH-----L-RLY-----RQC-CS
GR-----ELVDGILALG-----L
---GVH---SRSQVVGIC---QVLLDEGALC-----
-----H-----VKH-DWAFQDRDAQFYRFPGP
-----EPEP-VGAHEM-----
-----EEEL-----AEAVALLSQRGPDAL-----LTVALRKPPGQRT
DEELD----LIFEELLHIKAVAHLS-NSVKRELA-AVLLFEPHSKAGTVL-----
-----FSQGDKG---TSWYIIW
KGSVNVVTHGK---GL-----VTTLHEG-DDF
GQLAL-----VNDAPRA---ATIILREDNCHFLRVDKQDFNR-----IIKD---
-----V-----

```



```
>Rapgef3_[Condylura_cristata]_830194828
```

```

-----EEL-----VEAVALLSQRGPDAL-----LTVALRKLPQRT
DEELD----LIFEELLHIKAVAHLS-NSVKRELA-AVLLFEPHSGAGTVL-----
-----FSQGDKG--TSWYIIW
KGSVNVVTHGK----GL-----VTTLHEG-DDF
GQLAL-----VNDAPRA--ATIILREDNCHFLRVDKQDFNR-----IIKD--
-----V-----

```

```

-----EAKTMRLEEHGKVVLMER-----T-----SQS
AG-----PSRP-----SPPGRN-----R-YTVMMSGTPEKI
LELLLEA-----MRPDSSAHDPT-ETF-----LS---D-
FLLTYSV--FM-----SSTQLCTALL--HHF-----H-
-----AEPT--GSSEQERNTYICNKRQQILRLVSQ
WVALYGPTLHTD-PVATSFLQ---KLSDL--VSRDG--RLSHLLR--EQ-WPERRR-H
HRL---ENGCGNA--SP---QMKAR-----NVP-
---SW---LPSQD---EP-
-----L
---PSSA-

```

```

-----CAIRVGDK--VP-----YN-----
ICRSDHSVLTLQLPVTATVREVMA-----ALAQEDG----WT-----KGQ--VL
VKVNSA-----G-----DAVGLQPEARGVATSLGLNERLFVV
NAQE---V-QELT-PHPEQL-----GP-----TVGSA
EG--LDLVSAKDLAVQLTEHDWSLFNSIHQVELIH-----YVLGPQHL-RDVTTANLE
RFLRR-----FNELQYWV-----ATELCLCPEPGPR-----AQLLRKFIKLA AHL
-----KEQRNLNSFFAIMF-GLSNSAISRLGHTWE-----
-----RLPHKVRKLYSV-LERLL-----DPSWNH---
-RVYRM---ALTK-----LSPPII-PFMP-----
LLLKDMTFIHEGNH--TL-VE-----N-LINFE-KM
-----RM--MARAAARTLHHCRRSHA-----VPLSPLRS
RVSHLHEDSQAARTSTCEWGGVARPPC-CQLFT-----PRGRWS-----VI
RGSAGADRPKGL-----S--EGHM
FSD-----

```

```
>Rapgef3 [Coturnix japonica] 1003995665
```

-----MKVVRGAGTATATG  
TGTG-IGSGGETERRGAAPVGT-----HCQRTGLERCTGAVAPSTP---PL--S---P  
GGSGGDGKKLSV--LLKKM-----HLFRSSSYEI-----RLEGE-GGSL

PRIQG-----IRW-----T-----  
 -----PRLD-----AESSLDYGH-----SLTQAS-----S-----  
 -----DKIR-----RAGKLLF-----T-----Y-----LTNTS  
 PS-L-----IRDHKHH-----L-RHH-----RRC-CS  
 GK-----ELVDWMLNAE-----L-----  
 ----GIQ-----TRSQAIGVG--QVLVDGGVLT-----  
 -----H-----VKQ-EWHFQDKDTQFYRFAEL  
 E-----LSPEP-RMGLRDA-----  
 -----  
 -----EEL-----LEAVTFLVQLGPDAL-----LTMALRKAPAQRT  
 EDELE----LIFEELLHIKAVAHLS-NSVKRELA-SVLMFESHQRAGTV-----  
 -----LFSQGDKG--TSWYIVW  
 KGSVNVVTHGK----GL-----VATLHEG-DDF  
 GXLAL-----VNDAPRA--ASIIILREDNCHFLRVDKQDFNR-----ILKD-  
 -----V-----  
 -----  
 -----EANTMRLKEHGKVVVLVLQKNL-----QG  
 G-----SSQP-----ASMRSS-R-----YLVMAGTPEKI  
 LEHLLF-----MRLDATLYDPV-D-----TLLG---D-  
 FLLTYTV--FM-----PTSQLCRALL----HHF-----R-----  
 -----AEPLD--GSEQEKASYCLHKRRKILRLVSQ  
 WVLLYGRLLQGD-RSTTALLQ---NLAD--LVSQDP--RLGAMVQ--E--QERRR-  
 PRA--MENGSSSI--SP-----QPKSRS-----SMS-  
 ----W-----LSSQD-----EA-----  
 -----AL-----  
 ----NSSC-AL-----RAQDK-----  
 -----  
 -----  
 -----VP-----YE-----  
 IYRADHSCLVTVPVNASVRDVLQ-----SLTPQLG-----WDGE-HLL  
 VKVNSS-----GDKVG-----LQLDAVGVFVFTSLGLNERLFAV  
 SMEE---L-GGLT-PHPEQL-----GP-----HIGSS  
 DT--LDLISSKDLASHLTDYDWNLFKSIHQVEMIH-----YIVGPQKF-HEVTANLE  
 RMMRR-----FNELQYWV-----ATELCLCNELGRR-----AQLLRKFIKLAHL  
 -----KEQKNLSFFAVMF-GVSNTAVSRLAKTWE-----  
 -----RLPHKIRKLHSA-LERML-----DPSWNH--  
 -RVYRL---AVAK-----LSPPII-PFIPL-LLK-----  
 ----DMTFIHEGNR--TLA-----EN-LINFE-KM  
 ----HM--MAKTVRILQRCRG--QA-----HAPLSPLRT  
 RSPHRPEDARAVRIST-----  
 -----C-----SEQSLSV  
 RSPVSTWAY-LQHLKAIDSQKELLRLSRDLES-----



-----  
---  
>Rapgef3\_[Cricetulus\_griseus]\_625224026  
-----  
-----M-----  
-----  
-----K-----VGWPGDN-----  
-----HWQVGPAVVE-SPAVGAPQVES-----LPDVVPEGTLNLMVLKRMHRPRCCSYQ-L  
VFE-----HRRP-S-----CIQ-----  
-----GLR-----WT-----  
-----PLTNSEESLDFTV-SLEQA-----T-----T-----  
-----ERVL-----KA-----GKLLH-RHLLATY  
PT-L-----IRDRKYH-----L-RLY-----RQC-CS  
GR-----ELVDGILALG-----L  
-----GVH-----SRSQAVGIC---QVLLDEGALC-----  
-----H-----VKH-DWTFQDRDAQFYRFPGP  
-----EPEP--AGTHDV-----  
-----  
-----EEEL-----VEAMALLSQRGPDAL-----LTVALRKPPGQRT  
DEELD-----LIFEELLHIKAVAHLS-NSVKRELA-AVLLFEPHSGAGTVL-----  
-----FSQGDKG--TSWYIIW  
KGSVNVVTHGK-----GL-----VTTLHEG-DDF  
GQLAL-----VNDAPRA---ATIILRENNCHFLRVDKQDFNR-----I IKD--  
-----V-----  
-----  
-----EAKTMRLEEHGKVVLVLER-----S-----SQG  
TG-----PSRP-----PTPGRN-----R-YTVMSGTPEKI  
LELLLEA-----MRPDSSAHDPT-ETF-----LS---D-  
FLLTHSV--FM-----PSTQLFTALL---HHF-----H-----  
-----VEPAEPAGGSEQERSTYICNKRQQILRLVSR  
WVALYGPM LHS D-PVATSFLQ---KLSDL--VSRDA--RLSNLLK---EQ-WPERRR-H  
HRL---ENGCGNA--SP---QTKAR-----NAP-----  
-----VW-----LPSQE-----ES-----  
-----L-----  
---PSST-----  
-----  
-----  
-----  
-----GAIRVGDK--VP-----YD-----  
ICRPDHSVVT LQLPVTASVREVMA-----ALAHEDH-----WT-----KGQ--VL  
VKVNSA-----G-----DVVGLQPDARGVATSLGLNERL FVV  
DPQE---V-HELT-PHPEQL-----GP-----TLGSS  
DM--LELVSAKDLAQLTDHDWNLFNRIHQVELIH-----YVLGPQHL-RDVT TANLE  
RFMR-----FNELQYWV-----ATELCLCSVPGPR-----AQLLRKF IKLAAHL  
-----KEQKNLNSFFAVMF-GLSNSAISRLAHTWE-----  
-----RLPHKVRKLYSA-LERLL-----DPSWNH---  
-RVYRL---ALTK-----LSPPI- PFMP-----  
LLLKDMTFIHEGNH--TL-VE-----N-LINFE-KM  
-----RM--MARAVRMLHHC RSHT-----VPLSPLRS  
RVSHIHEDSQASRISTCSEQSLSTR-----S-----PASTWA-----YV  
QQLKVIDNQREL-----SRLSREL  
-----EP-----









-----EEL-----AEAVALLSQRPDAL-----LAVALRKPPGQRT  
DEELD----LIFEELLHIKAVAHLS-NSVKRELA-AVLLFEPHSGAGTVL-----  
-----FSQGDKG--TSWYIIW  
KGSVNVVTHGK----GL-----VTTLHEG-DDF  
GQLAL-----VNDAPRA--ATIVLREDNCHFLRGDV-----

-----P-----PAVVRP-----G-YTVMMSGTPEKI  
LELLLEA-----MRPDSSAHDPT-ETF-----LS---D-  
FLLTHSV--FM-----PSAQLCAALL--HHF-----H-----  
-----AEPA--GGSEQERSSYICNKRQLQILRLVQG  
WVALSGPLLHAD-PVAAGFLQ---KLSDL--VSRDA--RLSHLLR--EQ-GPERRR-L  
PRL---ENGCGNA--SP-----QMKAR-----NMP-----  
-----TW-----LPSQD-----EP-----  
-----L-----  
---PSS-----

-----CAIRVGDK--VP-----YD-----  
ICRPDHSVLTLQLPVTASVREVM-----ALAQQDG-----WT-----KGQ--VL  
VKVNSA-----G-----DAIRLQPDARGVATSLGLNERLFVV  
SPQA--V-HELT-PHPEQL-----GP-----TVGSA  
EG--LDLVSAKDLAQLTEHDWTLFNSIQQVELIH-----FVLGPQHL-RDVTANLE  
RFMRR-----FNELQYWV-----ATELCLCPVPGPR-----AQLLRKFIKLAHL  
-----KEQKNLNSFFAVMF-GLSNSAISRLAHTWE-----  
-----RLPHKVRKLYSA-LERLL-----DPSWNH--  
-RVYRL---ALAK-----LSPPVI-PFMP-----  
LLLKDMTFIHEGNH--TL-VE-----N-LINFE-KM  
-----RM--MARAMRMLHHCNRHSN-----  
-----GSEQSLSTR-----S-----PASTWA-----YV  
QQLKVIDNQREL-----SRLSREL-----  
-----EP-----

```
>Rapgef3 [Dipodomys ordii] 852756250
```

-----K-----VGWPGES-----  
 ---RWQVGLAVED-SPALGALQVGN---LPDVVPEGSLLLEMLKRMHRPRSCSYQ-L  
 LLQ-----HRRP-S-----RIQ-----

```

-----GLR-----WT-----
-----PLTSSEESLDFSV-SLEQA-----S-----T-----
-----ERVL-----RA-----GKHLV-RHLLVTF
PS-L-----IRDRKYH-----L-RLY-----RQC-CS
GR-----ELVDGILALG-----L
----GVH-----SRSQAVGIC---QVLLDEGALC-----
-----H-----VKH-DWTFQDREAQFYRFPGP
-----EPEP--AGAHEL-----
-----
-----EEEL-----VEAMALLSQRGPDAL-----LTVALRKPPGQRT
DEELD----LIFEELLHIKAVAHLS-NSVKRELA-AVLLFEPHISKAGTVL-----
-----FSQGDKG--TSWYIIW
KGSVNVVTHGK----GL-----VTTLHEG-DDF
GQLAL-----VNDAPRA--ATIILREDNCHFRLVDKQDFNR-----IIKD--
-----V-----
-----
-----EAKTMRLEEHGKVVLVLER-----A-----SQG
TG----SSRP-----PTPGKN-----R-YTVMSTGTPPEKI
LELLLEA-----MRADSNADPT-ETF-----LS--D-
FLLTHSV--FM-----PSAQLCAALL----HHF-----H-
-----AEPAPGAGGSEQERSTYICNKRQQILRLVSQ
WVALYSPMLHKD-PVVASFLQ---KLSDL--VKMDP--RLSNLLK--EQ-WPERRR-H
HRL---ENGCGNA--SP---QIKAR-----SPS-----
----AW-----LPSQD-----DS-----
-----L-----
---PSNH-----
-----
-----
-----
-----GAIRAGDK--VP-----YE-----
ICRPDHSVLTQLPVTASVREVM-----ALAREDG-----WT-----KGQ--VL
VKVNSA-----G-----DAIGLKPEARGVATSLGLNERLFVV
NPQD---I-HELT-PHPEQL-----GP-----TVGSA
EV--LEVMSAKDLAQQLTDHDWNLFNSIHQVELIH-----YVLGPQHL-RDVTTANLE
RFMR-----FNELQYWV-----ATELCLCPVPGPR-----AQLLRKFIKLAHL
-----KEQKNLNSFFAVMF-GLSNSAISRLAHTWE-----
-----RLPHKVRKLYSA-LERLL-----DPSWNH--
-RVYRL---ALTK-----LSPPVI-PFMP-----
LLLKDMTFIHEGNH--TL-VE-----N-LINFE-KM
-----RM--MARAVRMLHHCSSHNT-----VPLSPLRS
RVSHLHEDSQASRISTCSEQSL SIR-----S-----PASTWA-----YV
QQLKVIDNQREL-----SRLSREL
-----EP-----

```

-----  
---  
>Rapgef3\_[Echinops\_telfairi]\_850308220  
-----  
-----  
-----  
-----  
-----MVLRRMYRPRSCSYQ-L  
LLK-----HQRP-S-----CIQ-----  
-----GLR-----WT-----  
-----PLADSEESLDFSV-SLEQA-----P-----R-----  
-----ERVL-----RA-----GKQLH-RHLLATC  
PN-L-----IRDRKYH-----L-RLY-----RQC-CS  
GR-----ELVDGILALR-----L  
-----GVH-----SRSQAVGIC---QVLLDEGGLC-----  
-----H-----VKH-DWAFQDRDAQFYRFPGP  
-----EPQP--VGAQEV-----  
-----  
-----ED-L-----LEAVALLAQRGPDAL-----LTMALRKPPPGQRT  
DEELE-----LIFEELLHIKAVAHLS-NSVKRELA-AVLLFEPHSGAGTVL-----  
-----FSQGDKG--TSWYIIW  
KGSVNVVTHGK-----GL-----VTTLHEG-DDF  
GQLAL-----VNDAPRA---ATIILGEDNCHFLRVDKHDFNR-----IIKD--  
-----V-----  
-----  
-----EAKTMRLEEHGRVVLVLER-----A-----SQG  
TG-----PDPP-----AASGRN-----R-YTVMSGTPEKI  
LELLLEA-----MRPDSGAHDPT-ETF-----LS---D-  
FLLTHSV--FM-----PSAQLCAALL---HHF-----H-----  
-----AEPA---GGSEQERSYVCNKRQQIILRLVSQ  
WVALDGPMLHSD-PVVTSTFLQ---KLSEL--VSRDA--RLSTQLK---EQ-WPERRR-H  
HRL---ENGCGNM--SP---LIKAR-----NVP-----  
-----VW-----LPIQD-----EP-----  
-----L-----  
---SSSN-----  
-----  
-----  
-----  
-----CAIRAGDK--VP-----YD-----  
ICRPDHSVLTTLHLPVTSSVREVMA-----ALAQEDG-----WT-----KGQ--VL  
VKVNSA-----G-----DATGLQPEARGVATSLGLNERLFVV  
NPQE---V-HKLD-P-----  
-----  
-----  
-----SWNH---  
-RVYRL---ALTK-----LSPPII-PFMP-----  
LLLKDMTFIHEGNH--TL-VE-----N-LVNFE-KM  
-----RM--MARAVRLLHHCRSHGN-----VPLSPLRS  
RASQLHEDSQAMRVSTCSEQSVNSR-----S-----PASALA-----YV  
QQLKVIDNQREL-----SRLSREL  
-----EP-----



```
-----  
-----  
-----  
-----  
-----  
-----  
-----  
  
---  
>Rapgef3_[Elephantulus_edwardii]_585667532  
-----  
-----  
-----  
-----  
-----MVLRRMYRPRSCSYQ-L  
LLE-----HQRP-S-----RIQ-----  
-----GLR-----WT-----  
----PLTDSEESLD FSM-SLEQA-----S-----A-----  
--ERVL-----RA-----GKQLH-RHLLATC  
PN-L-----IRDRKYH-----L-RLY-----RQC-CS  
GR-----ELVDGILALG-----L  
---GVH-----SRSAVGIC--QVLLDEGALC-----  
-----H-----VKH-DWTFQDRDAQFYRFPGP  
-----VPEP--AGPHEM-----  
-----  
-----EDEL-----VEAVALLSQRGPDAL-----LTVALRKSPGQRT  
DEELD----LIFEELLHIKAHAHLNSSVKRELA-AVLLFEPHSKAGTVL-----FSQGDKG--TSWYIIW  
KGSVNVTTHGK----GL-----VTTLHEG-DDF  
GQLAL-----VNDAPRA--ATIILREDNCHFLRV DKQDFNR-----I IKD--  
-----V-----  
-----  
-----EAKTMRLEE HGKVVL VLER-----A-----SQG  
AA----ASHP-----ATPGRN-----R-YTVMSGTPEKI  
LELLLEA-----MRPD SG AHDPT-EMF-----LS--D-  
FL L TH SV--FM-----PSTQLCAALL--HHF-----H-----  
-----AEPA--GGSEQ ER ST Y ICNK RQQ IL RLVS Q  
WVALYG PML RTD-PVATS FLQ---KLSDL--VSRDA--RLSNLLR---EQ-WPERRR-H  
HRL---ENGCGNA--SP---QM KAR-----NVP-----  
---AW-----LPSQD-----EL-----  
-----L-----  
---PSSN-----  
-----  
-----  
-----CAIRVGDK--VP-----YD-----  
ICRPDH SVLTL HLP VTASVREVMA-----ALA QED S-----WT-----KGQ--VL  
VKVNSA-----G-----DAIGLQP DARG VATSL GLNERLFVV  
NPQE--M-HKLT-PHQEQL-----GP-----TVGSA  
EG--LDLVSVK ELAQ LT DH DW SL F NSIHQVEL IH-----YVL GPQH L-RTV T TAN LE
```

```
RFMR-----FNELQYVW----ATELCLCPVPGLR-----AQLLRKFIKLA AHL
-----KEQKNLNSFFAIMF-GLSNSAISRLAHTWE-----
-----RLPHKVRKLYSA-LERLL-----DPSWNH---
-RVYRL---ALTK-----LSPPVI-PFMP-----
LLLKDMTFIHEGNH--TL-VE-----N-LINFE-KM
-----RM--MARAVRMLHRCRSHSN-----VPLSPLRS
RVSHLHDDGQAARISTCSEQSLSTR-----S-----PASTWA-----YV
QQLKVIDNQREL-----SRLSREL
-----EP-----
```



```

AG-----PSRP-----PTPGRN-----R-YTVMMSGTPEKI
LELLLEA-----MRPDSSAHDPT-ETF-----LS---D-
FLLTHSV--FM-----PSAQLCAALL--HHF-----H-----
-----AEPA---GGSEQESSSYICNKRQQILRLVSO
WVALYGPMLHND-PVATSFLQ---KLSDL--VSRDA--RLSNLLR---EQ-WPERRR-H
HRL---ENGCGNA--SP-----QMKAR-----NMP-----
-----VW-----LPSQD-----EP-----
-----L-----
---PSSN-----
-----
-----
-----
-----
-----CAIQVGDK--VP-----YD-----
ICRPDHSVLTQLQLPVTASVREVM-----ALAQEDS---WT-----KGQ--VL
VKVNSA-----G-----DAVGLQPDARGVATSLGLNERLFVV
NPQE--V-HELT-PHPEQL-----GP-----TVGSA
EG--LDLVSAKDLAQQLTDHDWNLFNSIHQVELIH-----YVLGPQHL-RDVTTANLE
RFMR-----FNELQYWV-----ATELCLCPVPGPR-----AQLLRKFIKLAHL
-----KEQKNLNSFFAVMF-GLSNSAISRLAHTWE-----
-----RLPHKVRKLYSA-LERLL-----DPSWNH---
-RVYRL---ALTK-----LSPPVI-PFMP-----
LLLKDMTFIHEGNH--TL-VE-----N-LINFE-KM
-----RM---MARAVRMLHHCRRSHSS-----VPLSPLRS
RVSHFHEDGQAARISTCSEQSLSTR-----S-----PASSWA---YV
QQLKVIDNQREL-----SRLSREL
-----EP-----

```

-----MVLRRMHRPRSCSYQ-L  
LLE-----HQRP-S-----RIQ-----  
-----GLR-----WT-----  
-----PLTNSEESLDFSV-SLEQA-----S-----T-----  
-----ERVL-----RA-----GKQLH-RHLLANC  
PN-L-----IRDRKYH-----L-RLH-----RQC-CS  
GR-----ELVDGILALG-----L  
----GVH-----SRSQAVGIC--QVLLDEGALC-----  
-----H-----VKH-DWTFQDRDTQFYRFPGP  
-----EPEP--AGVHEL-----

```
--EEEL-----VEAMALLSQRGPDAV-----LTVALRKPPGQRT  
DEELD-----LIFEELLHIKAVAHLS-NSVKRELA-AVLLEPHSKAGTVL-----  
-----FSQGDKG--TSWYIIW  
KGSVNVTTHGK----GL-----VTTLHEG-DDF  
GQLAL-----VNDAPRA---ATIILREDNCHFLRVDKQDFNR-----I IKD--  
-----V-----  
  
-----EAKTMRLEEKGKVVLVLER-----T-----SQG  
AG----PSRP-----PTPGRN-----R-YTVMSTPEK  
LELLLEA-----MRPDSSAHDPT-ETF-----LS---D-  
FLLTHSV--FM-----SSAQLCAALL---HHF-----H-  
-----AEPA---GGSEQESSSYICNKRQQILRLVSQ  
WVALYGPM LHND-PVATSFLQ---KLSDL-VSRDA--RLSNLLR---EQ-WPERRR-H  
HRL---ENGCGNA--SP-----QM KAR-----NMP-----  
-----VW-----LPSQD-----EP-----  
-----L-----  
---PSSN-----  
  
  
-----CAIQVGDK--VP-----YD-----  
ICRPDH SVLTLQLPV TAS VREVMA-----ALA QEDS-----WT-----KGQ--VL  
VKVNSA-----G-----DAV GLQP DARG VATSLGLNERLFVV  
NPQE--V-HELT-PHP EQL-----GP-----TVGSA  
EG--LDLVSAKDLAGQLTD HDWN LF NSIHQVEL IH-----YVL GPQH L-RDV TTAN LE  
RFM RR-----FN ELQYWV-----ATELC LCP VP GPR-----AQ LL RKFI K LA AHL  
-----KEQKNL NSFF AV MF-GLSNSAIS RL AHTWE-----  
-----RL PHKVR KL YSA-LERLL-----DP SWNH---  
-RVYRL---ALT K-----LS PPVI -PF MP-----  
LLL KDM TFI HEG NH---TL-VE-----N-LINFE-KM  
-----RM---MAR AVR ML HH CR SH SS-----VPL SPLRS  
RVSHFH EDGQAARISTCSEQ SLSTR-----S-----PASSWA-----YV  
QQLKV IDNQREL-----SR LS REL  
-----EP-----  
  
  
  
  
--->Rapgef3_[Equus_przewalskii]_664709775
```

```

-----GLR-----WT-----
-----PLTNSEESLDFSV-SLEQA-----S-----T-----
-----ERVL-----RA-----GKQLH-RHLLANC
PN-L-----IRDRKYH-----L-RLH-----RQC-CS
GR-----ELVDGILALG-----L
----GVH-----SRSQAVGIC---QVLLDEGALC-----
-----H-----VKH-DWTFQDRDQTQFYRFPGP
-----EPEP--AGVHEL-----
-----
-----EEEL-----VEAMALLSQRGPDAV-----LTVALRKPPGQRT
DEELD----LIFEELLHIKAVAHLS-NSVKRELA-AVLLFEPHSKAGTVL-----
-----FSQGDKG--TSWYIIW
KGSVNVVTHGK----GL-----VTTLHEG-DDF
GQLAL-----VNDAPRA--ATIILREDNCHFRLVDKQDFNR-----IIKD--
-----V-----
-----
-----EAKTMRLEEHGKVVLVLER-----T-----SQG
AG----PSRP-----PTPGRN-----R-YTVMSTGTPPEKI
LELLLEA-----MRPDSSAHDPT-ETF-----LS---D-
FLLTHSV--FM-----SSAQLCAALL----HHF-----H-
-----AEPA--GGSEQESSYICNKRQQILRLVSQ
WVALYGPMLHND-PVATSFLQ---KLSDL--VSRDA--RLSNLLR--EQ-WPERRR-H
HRL---ENGCGNA--SP---QMKAR-----NMP-----
----VW-----LPSQD-----EP-----
-----L-----
---PSRN-----
-----
-----
-----
-----CAIQVGDK--VP-----YD-----
ICRPDHSVLTQLPVTASVREVM-----ALAQEDS-----WT-----KGQ--VL
VKVNSA-----G-----DAVGLQPDARGVATSLGLNERLFVV
NPQE---V-HELT-PHPEQL-----GP-----TVGSA
EG--LDLVSAKDLAQQLTDHDWNLFNSIHQVELIH-----YVLGPQHL-RDVTTANLE
RFMR-----FNELQYWV---ATELCLCPVPGPR-----AQLLRKFIKLAHL
-----KEQKNLNSFFAVMF-GLSNSAISRLAHTWE-----
-----RLPHKVRKLYSA-LERLL-----DPSWNH---
-RVYRL---ALTK-----LSPPVI-PFMP-----
LLLKDMTFIHEGNH--TL-VE-----N-LINFE-KM
-----RM--MARAVRMLHHCRRSHSS-----VPLSPLRS
RVSHFHEDGQAARISTCSEQSLSTR-----S-----PASSWA-----YV
QQLKVIDNQREL-----SRLSREL
-----EP-----

```

-----  
---  
>Rapgef3\_[Erinaceus\_europaeus]\_1016600502  
-----  
-----M-----  
-----  
-----K-----VGWPGEG-----  
-----SWQVGLAVEDVGLALGAPPVGG-----LPDALPEGTLTLLSMVLRRMHRPRSCSYQ-L  
LLE-----PQRP-S-----RIQ-----  
-----GLR-----WT-----  
-----PLTDSVESLDFSG-SLEQA-----S-----T-----  
-----ERVL-----RA-----GKQLH-RHLLATC  
PN-L-----IRDRKHH-----L-RPY-----RQC-CS  
GR-----ELVDAVLALG-----L  
-----GVH-----SRSQAVGIC---QVLLDDGALC-----  
-----H-----VKH-DWTFQDRETQFYRFPGP  
-----EPEP--VGIHEL-----  
-----  
-----EEEL-----VEALALLSQRGPDAL-----LTVALRKPPGQRT  
DEELD-----LIFEELLHIKAVAHLS-NSVKRELA-AVLLFEPHSGAGTVL-----  
-----FSQGDKG--TSWYIIW  
KGSVNVVTHGK-----GL-----VTTLHEG-DDF  
GQLAL-----VNDAPRA---ATIILREDNCHFLRVDKQDFNR-----IIKD--  
-----V-----  
-----  
-----EAKTMRLEEHGKVVLVLER-----T-----CQG  
SS-----TSQP-----PAPGRN-----R-YTVMSGTPEKI  
LELLLEA-----MRPDSSAHDPT-ETF-----LS---D-  
FLLTHSV--FM-----PSTQLCTALL---HHF-----H-----  
-----AEPA---GGSEQERSTYICNKRQQIILRLVSQ  
WVALYGPMLRTD-TVATSFLQ---KLSDL--VSRDA--RLSNLLR---EQ-WPERRR-H  
HRL---ENGCGNA--SP-----QMKAR-----NLP-----  
-----VW-----LPSQD-----EP-----  
-----S-----  
---PSSN-----  
-----  
-----  
-----  
-----CVIQVGDK--VP-----YD-----  
ICRPDHTVLTQLPVTASVREVL-----ALAQEDG-----WT-----KGQ--VL  
VKVNSA-----G-----DAVGLQPDARGVATSLGLNERLFVV  
NPQE---M-NELT-PHPEQL-----GP-----TVGAA  
EG--LDLVSAKDLAQQLTDHDWGLFNSIHQVELIH-----YVLGPQHL-RDVTTANLE  
RFMR-----FNELQYWV-----ATELCLCPLPGSR-----AQLLRKFIKLAHL  
-----KEQKNLNSFFAIMF-GLSNSAISRLAHTWE-----  
-----RLPHKVRKLYSA-LERLL-----DPSWNH---  
-RVYRL---ALSK-----LSPPII-PFMP-----  
LLLKDMTFIHEGNH--TL-VE-----N-LINFE-KM  
-----RM--MARAVRMLHHCRRSHS-----VPLSPLRS  
RVSHLHEDSQAARISTCSEQSLGTR-----S-----PASTWA-----YV  
QQLKVIDNQREL-----SRLSREL-----  
-----EP-----











```

-----EEL-----LEALGFLGQLGPDAL-----LSMALRKPPAQR
QDELE----LIFEELLHIKAVAHLS-NSVKRELA-AVLMFEGHQ RAGTV-----
-----LFSQGDKG--TSWYIIW
KGSVN VVTHGK----GL-----VATLHEG-DDF
GQLAL-----VNDAPRA--ATILLREDNCHFLRVDKHDFNR-----ILKD--
-----V-----
-----EANTVRLKEHGKVVLVLQKDL-----QG
G-----GGQA-----ASAR-SSR-----YLVMAGTPEK
LEHLLLF-----MRLDATVYDPV-D-----TLLG---D-
FLTTYTV--FM-----PTSQLCRALL---HHF---R-
-----AEPL E---GSEQDKAAAYSLRKRRKILRLVSQ
WVLLYGRL LQGD-RSTALLQ---NLAD--LASRAP--Q-----G-
PPT--GWAGPGAG--PG-----AAATPS-----CPP-----
-----S-----VLQGP-----PV-----
-----FP-----
---DATA-GV-----RGRPE-----
-----C-----
--RGWRVPGVT RIPGMTQT PGVTG-----G-DPNSG-----GDPR-IPG
MTRTPG-----GS-----GVFSR-----
-----AQ T-PHP EQL-----GP-----HAGSS
DT--LDLISSKELASHLT DYDSL FKS IHQVEMIH-----YIVGPQKF-HEVATANLA
RVMRR-----FN ELQFWV-----ATELC LCPELG RR-----AQLLRKF IKLAAHL
-----KEQKNL NSFFAVMF-GVSNTAVTRLAKTWE-----
-----RLPHKIRKLHSA-LERML-----DPSWNH---
-RVYRL---AVAK-----LSPPII -PFVPL-LLKGLCP-----
-----ALGT-----L
W-----VCPTLS
GGPSDPRE--AVRIST-----
-----C-----SEQSLSM
RSPVCTWAY-LQHLRAIDSQKELLRLSRNLEP-----
-----
>Rapgef3_[Fukomys_damarensis]_731247212
-----
-----MVLRRMHLP RSCSYQ-L
LLE-----HRRP-A-----HIO-----

```

```

-----GLR-----WT-----
-----PLTNSEESLDFSD-SLEQV-----S-----T-----
-----ERVL-----RA-----GRYLH-RHLLAAC
PT-L-----IRDRKYH-----L-RLY-----RQC-CS
GR-----ELVDGILALG-----V
----GVH-----SRSQAVGIC---QVLLDEGALC-----
-----H-----VKH-DWTFQDRDAQFYRFLGL
-----EPQP--AGPHEL-----
-----
-----EEEL-----VEAMALLSQRGPDAL-----LTVALRKPPGQRM
DEELD----LIFEELLHIKAVAHLS-NSVKRELA-AVLVFEPHISKAGTVL-----
-----FSQGDKG--TSWYIIW
KGSVNVVTHGK----GL-----VTTLHEG-DDF
GQLAL-----VNDAPRA--ATIILREDNCHFRLVDKQDFNR-----IIKD--
-----V-----
-----
-----EAKTMRLEEHGKVVLVLEK-----T-----SQG
AG----PSRP-----QTPGQN-----R-YKVMSTPEKI
LELLLEA-----MRPDSSAHDPT-EMF-----LS---D-
FLLTHSV--FM-----PTAQLCTALL----HHF-----H-
-----AGPAESAGGSEQECSTYICNRRQQILRLVSH
WVALYGPMLHKD-PVATSFLQ---KLSDL--VSKDS--RLSNLLR--EQ-GSERRR-H
HRL---ENGYGSA--SP---QLKVR-----NIP-----
----VW-----LPSQD-----EP-----
-----L-----
---PSSN-----
-----
-----
-----
-----CAIRVGDK--VP-----YD-----
ICRPDHSVLTQLPVTASVREVMV-----ALAQEDG-----WT-----KGQ--VL
VKVNSA-----G-----DAIGLQPDARGVATSLGLNERLFVV
NQQE---V-HKLT-PHPEQL-----GP-----TVGSA
EG--LDMVSAKDLAQQLTDHDWNLFNSIHQVELIH-----YVLGPQHL-RDVTTANLE
RLMRR-----FNELQYWV-----ATELCLCSVPGLR-----AQLLRKFIKLAHL
-----KEQKNLNSFFAIMF-GLSNSAISRLAHTWE-----
-----RLPHKVRKLYSA-LERLL-----DPSWNH---
-RVYRL---ALTK-----LSPPII-PFMP-----
LLLKDMTFIHEGNH--TL-VE-----N-LINFE-KM
-----RM--MARAVRLLHHCRSHST-----VPLSPLRS
RVSHLHEDSQASRISTCSEQSLSTR-----S-----PASTWA-----YV
QQLKVIDNQREL-----SRLSREL
-----EP-----

```

-----  
---  
>Rapgef3\_[Fundulus\_heteroclitus]\_831559262  
-----  
-----  
-----  
-----  
-----MHLFRTHNYQ-V

F----PH-----RYSVE-K--PTIR-----  
-----GIS-----WT-----  
-----PLPEALDP---KD-TMKQ-----FLS-----  
-----DRVV-----KA-----ARSVY-SVMIEKN  
PG-L-----IRDRKHH-----L-KTH-----RQC-CS  
GK-----ELVDWLMKQS-----E  
----FLQ-----SRSQAVGMW---QVLVDERIIV-----  
-----H-----VKQ-DLNFLDKDTQFYRFQDA  
-----ELGLSHVSNEK-----  
DL-----  
-----EEEL-----HEALSLLSQLGPDAL-----LSMILRKCPTQRS  
AEDIE-----VIYEELLHVKAAAHLS-SSVRKELA-AVLVFESHVKSGTVL-----  
-----FSQGDKG--TSWYIIW  
KGSVNVITHGK----GI-----VTTLHEG-EDF  
GQLAL-----LNDAPRA---ATIILREDNCHFLRVDKQDFIR-----ILKD--  
-----V-----  
-----  
-----  
-----EANTVRLEEHRGRTVVVLEK-----S-----  
AD----CNGQG-----GAAANS-----K-YTVMSGTPEKI  
LEHLLDT-----LKLDSENGNDPI-DP-----CVS---D-  
FLLTHKV--FM-----PSSQLCSALQ----HHY-----Q-----  
-----AELSE---GSEQEKTAYVFNTKQRVVKLIAQ  
WVALYGLLLKED-PDVWDFLE----RLKKE--VGADN--RLSSILK---EQ-FRERRR--  
TKV---LENGYQSL--S-----R-N-QQFD-----  
-----W-----FSSCE-----EP-----  
-----  
---AGRL-----  
-----  
-----  
-----  
-----

----QPIKSQDK--VL-----YE-----  
VYTPDSKPLSLMLPVNTSVQEVMS-----AIVKAE-----GDH--VL  
VKMNST-----G-----ERAQLKLDATAVYTALGVNERLFIC  
TSSE---V-EQLR-PLKEQQ-----GP-----EQGTT  
DL--MEQMSSKDVAIELTNYDWELFTAMHEVELVY-----YIFGRHKF-PGATTANLE  
RFVRH-----FNVVQYWV-----VTELCLCEDLVKR-----AILLKKFIKIASVL  
-----KEQRNLNSFFAVMF-GLGNSAVQRLYKTWD-----  
-----RIPSKTKRIYCA-YERLM-----DPTRNH---  
-RAYRL---AVAK-----LSPPYI-PFMP-----  
LLLKDMTFIHEGNP--NY-VD-----K-LVNFE-KM  
-----RM---LAKTVKIVRECRSQPY-----VPSSPQRG  
LADRMFLDGPATRLSTYSDBALPLR-----S-----PSNIRH-----YI  
QNLKVIDNQRL-----TQLSRTI  
-----EC-----

```
>Rapgef3_[Galeopterus_variegatus]_667328784
```

```
-----MLHTD-PVATSFLLQ---KLSDL--VSRDS--RLSNLLR---EQ-WPERRR-H
HRL---ENGCGNA--SP---QMKAW---NVP-----
-----VW-----LPGQD-----EL-----
-----L-----
-----HSSN-----
```

-----CAIRAGDK--VP-----YD-----  
ICRPDHSVLTQLPVTASVREVMV-----ALAQEDG-----WT-----KGQ--VL  
VKVNSA-----G-----DAIGLQPDARGVATSLGLNERLFVV  
NPQE--V-HEL-----  
-----VELIH-----YVLGPQHL-RDVTTANLE







G-----SGQA-----ASGR-----S-SR-YLVMAGTPEKI  
LEHLLLEF-----MRLDATLYDPV-D-----TLIG---D-  
FLLTYTV--FM-----PTSQLCRALL---HHF-----R-----  
-----AEPLE---GSEQDKASYSLRKRKILRLVSQ  
WVLLYGRLL-GE-RGS---LE---G-SGVLSRAQTP--HPEQLGP--HA-GSSDTL--  
D-----

-----LISSKDLASHLTDYDWNLFKSIHQVEMIH-----YIVGPHKF-HEVATANLA  
RVLRRGCQPRDPIPAQRLPHKIRKLHSALERMLDPSWNHRVYRLAVAKLSPPIIPFVPLL  
-----LKDMTFIHE-GNRTLAENLINFEKM-----  
-----HMMAKTVRV-LQ-----

-----RCRG--HA-----HAPLSPLRS  
RSPHRPEDTKAVRIST-----  
-----C-----SEQSLSV  
RNPVSTWAY-LQHLRAIDSQKELLRLSRELEP-----

```
>Rapgef3_[Gorilla_gorilla_gorilla]_426372289
```

-----K-----VGWPGEN-----  
 -----CWQVGLAVED-SPALGAPRVGA----LPDVVPEGTLLNMVLRMRHPRSCSYQ-L  
 LLE-----HQRP-S-----CIQ-----  
 -----GLR-----WT-----  
 -----PLTNSEESLDFSE-SLEQA-----S-----T-----  
 -----ERVL-----RA-----GRQLH-RHLLATC  
 PN-L-----IRDRKYH-----L-RLY-----RQC-CS  
 GR-----ELVDGILALG-----L-----  
 -----GVH-----SRSQVVGIC--QVLLDEGALC-----  
 -----H-----VKH-DWAFQDRDAQFYRFPGP  
 -----EPEP-VGTHEM-----



```

PRIQG-----IRW-----T-----
-----PLLD-----TESTLDYGH-----SLTQAS--S-----
-----EKIW-----RAGKLLF-----I---H---LTSTR
PG-L-----IRDHKHH-----L-RHH-----RQC-CS
GK-----ELVDWLLSAG-----L
---AVQ-----TRSQAIGIC---QVLVDGGVLT-----
-----H-----VKQ-EWHFQDKDTQFYRFAEL
E----LSPEP-SAGLRDA-----
-----
-----EEL-----LEALAFLAQLGPDAL-----LTMALRKPPAQRT
EDELE----LIFEELLHIKAVAHLS-NSVKRELA-SVLMFESHQRAGTV-----
-----LFSQGDKG--TSWYIIW
KGSVNVVTHGK----GL-----VATLHEG-DDF
GQLAL-----VNDAPRA--ATIILREDNCHFRLRVDKQDFNH-----ILKD--
-----V-----
-----
-----EANTMRLEKHGKVVLVLQKNL-----QG
G-----SSQS-----ATARSS-R-----YFVMAGTPEKI
LEHLLLEF-----MRLDATLYDPM-D-----TLLG---D-
FLLTYTV--FM-----PTSQLCRALL-----HHF-----R-
-----AEPL--GSEQEKATYSLHKRRKILRLVSQ
WVLLYGRLQLGD-RSTALLQ---NLAD--LASQDP--RLGGLVQ--EQ-AQDRRR-
PRA--LENGDGSV--SP-----QPKARS-----SGN-----
---W-----LTSQE-----EA-----
-----IL-----
---NSSC-AL-----RAQDK-----
-----
-----
-----
-----VP-----YE-----
IYRPDHSCLITVLPVNASVRDVL-----SLAPRLG-----RDGE-HIL
VKVNSA-----GDKVG-----LQLDAVGVTALGLNERLFAV
SVEE---L-GSLT-PHPEQL-----GP-----HVGSS
ET--LDLISSKDLASHLTDYDWNLFKSIHQVEMIH-----YIVGPQKF-HDVTANLE
RVMRR-----FNELQYWV-----ATELCLCPEVGR-----AQLLRKFIKLAHL
-----KEQKNLNSFFAVMF-GVSNTAVSRLAKTWE-----
-----RLPHKIRKLHSA-LERML-----DPSWNH--
-RVYRL---AVAK-----LSPPII-PFVPL-LLK-----
---DMTFIHEGNR--TLA-----EN-LINFE-KM
---HM--MAKTVRVLQRCRG--HA-----HAPLSPLRN
RSPHRPEDPKAIRIST-----
---C-----SEQSLSV
RSPVSTWAY-LQHLKAIDSQKELLRLSHDLES-----

```

-----  
---  
>Rapgef3\_[Heterocephalus\_glaber]\_513003374  
-----  
-----  
-----  
-----MKVGWPGES-----  
-----HWQLDPAVED-SPVLGVPQIGG----LPHVVPEGTLLNMVLRRMHLPRSCSYQ-L  
LLE-----HRRP-N-----HIQ-----  
-----GLR-----WT-----  
-----PLANSEESLDFSE-SLEQV-----S-----T-----  
-----ERVL-----RA-----GRDLH-RHLLATC  
PT-L-----IRDRKYH-----L-RLY-----RQC-CS  
GR-----ELVDGILALG-----L  
-----GVH-----SRSQAVGIC---QVLLDEGALC-----  
-----H-----VKH-DWTFQDRDAQFYRFLGP  
-----EPQP--VGPHEL-----  
-----  
-----EEEL-----VEAMALLSQRGPDAL-----LTVALRKLPQGRT  
DEELD-----LVFEELLHIKAVAHLS-NSVKRELA-AVLVFEPHSGAGTVL-----  
-----FSQGDKG--TSWYIIW  
KGSVNVVTHGK-----GL-----VTTLHEG-DDF  
GQLAL-----VNDAPRA---ATIIILREDNCHFLRVDKQDFNR-----IIKD--  
-----V-----  
-----  
-----EAKTMRLEEHGKVVLVLER-----T-----SQG  
AG-----PSRL-----PSPGRN-----R-YKVMSTPEKI  
LELLLEA-----MRPDSTAHDP-ETF-----LS---D-  
FLLTHSV--FM-----PTAQLCTALL----HHF-----H-----  
-----AGPADSAGGSELERSTYICNRRQQILRLVSQ  
WMALYGPM LHKD-PVATSFLQ----KLSDL--VNKDA--RLSNLLR---EQ-WPERRR-H  
HKL---ENGCGST--SP-----QLKAR-----DTP-----  
-----VW-----LPCQD-----EP-----  
-----L-----  
---PSSN-----  
-----  
-----  
-----CAIRVGDK--VP-----YD-----  
ICRPDHSVLTLYLPVTASVREVMA-----ALAQEDG-----WT-----KGQ--VL  
VKVNSA-----G-----DATGLQPDARGVATSLGLNERLFVV  
NQQE---V-HKLT-PHPEQL-----GP-----TVGSA  
EG--LDMISAKDLAQLTDQDWSLFNSIHQVELIH-----YVLGPQHL-RDVTTANLE  
RFMR-----FNQLQYWV-----ATELCLCSVAGLR-----AQLLRKFIKLAAHL  
-----KEQKNLNSFFAVMF-GLSNSAISRLAHTWE-----  
-----RLPHKVRKLYSA-LERLL-----DPSWNH---  
-RVYRL---ALAK-----LSPPII-PFMP-----  
LLLKDMTFIHEGNH--TL-VE-----N-LINFE-KM  
-----RM--MARTARLLHHCRRSHST-----VPLSPLRS  
RVSHLHEDGQASRIST-----  
-----

[illegible]

```
RFMR-----FNELQYVW----ATELCLCPVPGPR-----AQLLRKFIKLA AHL
-----KEQKNLNSFFAVMF-GLSNSAISRLAHTWE-----
-----RLPHKVRKLYSA-LERLL-----DPSWNH---
-RVYRL---ALAK-----LSPPVI-PFMP-----
LLLKDMTFIHEGNH--TL-VE-----N-LINFE-KM
-----RM--MARAAARMLHHC RSHNP-----VPLSPLRS
RVSHLHEDSQVARISTCSEQSLSTR-----S-----PASTWA-----YV
QQLKVIDNQREL-----SRLSREL
-----EP-----
```







[illegible]

```

-----MG-----ET-----
-----PLPEALNS---KD-TMKQ-----FLS-----
-----DRVV-----KA-----ARSVY-SVMIERN
PG-M-----IRDRKHH-----L-KTY-----RQC-CS
GK-----ELVDWLMKQN-----E
----CLQ-----SRSQAVGMW--QVLVDEGILV-----
-----H-----VKH-ELNFQDKDTQFYRFQDS
-----ECGPNHTTNEK-----
DS-----
-----EDEL-----QEGLSLLSQLGPDAL-----LTMILRKCPQRS
AEDLE----VIYEELLHVKAAAHLS-TSVRKELA-AVLVFESHAKAGTVL-----
-----FSQGDKG--TSWYIIW
KGSVNVITHGK----GL-----VTTLHEG-EDF
GQLAL-----LNDAPRA--ATIILREDNCHFRLVDKQDFIR-----ILKD--
-----V-----
-----
-----EANTVRLQEHGKTVLVLEK-----S-----
SD---WAEQG-----GAGCNS-----K-YTVMSTGTPKEI
LEHLLT-----IKLDSNGNDAL-DP-----CVS---D-
FLLTHKV--FM-----PSSQLCEALQ---HQYPAMCTYQ-----
-----AELSE--GSDQEKASYILTTKQKVVLVGQ
WVLYGLLLKED-PIALNFLE---RLKKE--VAGDF--RLSSVLK--E--FRERRR--
TRV---SENGYQSL--S-----R-N-QQFD-----
-----W-----FSNCE-----EP-----
-----
---VGRI-----
-----
-----
-----
-----QPIRAQDK--ML-----YE-----
IYRPDNKPLTLMLPVNTSVQDVMS-----AIVKPG-----GDH--IL
VKMNSA-----G-----ERAQLKLDAVYTALGLNEKLFIC
TSSQ---V-EQLM-PLKEQQ-----GP-----ERATT
DI--LEQMSSKDIANELTNYDWELFTAMHEVELVY-----YVFG RHKF-SGVITANLE
RFVRR-----FNEVQHWV-----VTELCLCEDLVKR-----AILLKKFIKIAAVL
-----KEQKNLNSFFAVMF-GLSNSAVHRLYKTWE-----
-----RIPSKTKRIYCA-YERLM-----DPSRNH---
-RAYRL---AVAK-----LSPPYI-PFMP-----
LLLKDMTFINEGNP--NY-VE-----K-LVNFE-KL
-----RM---IAKTVKIVRGCRSQPY-----VPSSPQRG
LADRMFLEGPTNRISTYSNGLPLR-----N-----PSNIRH----YI
QNLKVIDNQRL-----TQLSRTT
-----EC-----

```



-----MEDSEHHANP-T  
PTPG-----TSADQ--ELPEKPD--CAS-----T-----  
-----PLPEELDA---QD-TMRQ-----FLF-----  
-----QRVL-----KA-----GRALY-AALIERS  
PG-L-----IRDRKYH-----L-KTY-----RRC-CT  
GK-----ELVDWLMKVN-----G-----  
----SIQ-----SRSQAVGMW---QVLVDEGILV-----  
-----H-----AKQ-ELNFQDKDAQFYHFLEA  
-----EFGADHTATEK-----  
DS-----  
-----EDEL-----QEAMALLAQMGPDAL-----LTMILRKPPSQRG  
PEDLE----VIFEELLHIKAVAHLS-SSVRRELA-AVLVFESHAKAGTLL-----  
-----FSQGDKG--TSWYIIW  
KGSVNVITHGK---GL-----VTTLHEG-DDF  
GQLAL-----LNDAPRA--ATIILREDNCHFLRVDKQDFIH-----ILKD-  
-----V-----  
-----  
-----EANTVRLEEKGKVVLVLEK-----S-----SQS  
EQ----SSQG-----GSANSN-----K-YTVMSGTPEKI  
LEHLLET-----VRLDSNPSELP-DS-----CVT---D-  
FLLTHCV--FM-----PSSQLCPVLL---HYY-----H-----  
-----TEPSE---GSELEKAAYSINKKQKIIRLLYQ  
WVGLYGKLLKED-PTAVEFLE---SLKGA--VVRDS--RLTVMLK---EQQLPDRRK-  
TRA---LENGYSAA--S---QSKANEFD-----  
---W-----FSGQE-----EC-----  
-----  
---VRKC-----  
-----  
-----  
-----  
----RPIRSQDK--VL-----YE-----  
IFRPDRTPVSLMLPVDTSVQDVIS-----ALVNPG-----GNH--VL  
VKINSS-----G-----ERAQLKLDTTAVFTSLGVNERLFLC  
TANQ--V-DQLI-PLKEQQ-----GP-----DQGT  
DS--LEQMSSKDIACQLSDYDWELFGAMHEVELVY-----YIFGRHKF-RGATTANLE





TG-----PSRP-----PTPGRN-----R-YIVMSGTPEKI  
 LELLLEA-----MRPDSSAHDPT-ETF-----LS---D-  
 FLLTHSV--FM-----PTAQLCAALL----HHF-----H-----  
 -----AEPV---GGSEQECSTYICNKRQQILRLVSQ  
 WVALYGPMLHTD-PVATSFLQ---KLSDL--VSRDA--RLSNLLR---EQ-WPERRR-H  
 HRL---ENGCGNA--SP---QMKAW-----NVP-----  
 ----VW-----LPSQD-----EP-----  
 -----L-----  
 ---PSSN-----  
 -----  
 -----  
 -----  
 -----  
 -----CAIRVGDK--VP-----YD-----  
 ICRPDHSVLTLQLPVTASVREVM-----ALAQEDG---WT-----KGQ--VL  
 VKVNSA-----G-----DTVGLQPDAGVATSLGLNERLFVV  
 NPQE--V-HKLT-PHPEQL-----GP-----TVGSA  
 EG--LDLVSTKDLAQLTDHDWGLFNSIHQVELIH-----YVLGPQPL-RDVTTANLE  
 RFMRR-----FNELQYWV-----ATELCLCPVPGLR-----AQLLRKFIKLAHL  
 -----KEQKNLNSFFAIMF-GLSNSAISRLAQTWE-----  
 -----RLPHKVRKLYSA-LERLL-----DPSWNH---  
 -RVYRL---ALTK-----LSPPLI-PFMP-----  
 LLLKDMTFIHEGNH--TL-VE-----N-LINFE-KM  
 -----RM---MARAARMLHHCRRSHN-----VPLSPLRS  
 RVSHLHEDSQAARISTCSEQSLSTR-----S-----PASTWA-----YV  
 QQLKVIDNQREL-----SRLSREL-----  
 -----EP-----

-----MVLRRMHRPRSCSYQ-L  
LLE-----HRSP-S-----CIQ-----  
-----GLR-----WT-----  
-----PLTDSEESLDFSV-SLEQA-----S-----T-----  
-----ERVL-----RA-----GKQLH-RHLLATC  
PN-L-----IRDRKYH-----L-RLY-----RQC-CS  
GR-----ELVDGILALG-----L  
----GVH-----SRSQAVGVC--QVLLDEGALS-----  
-----H-----VKH-DWTFQDRDAQFYRFPGL  
-----EPEP--VGAHEM-----



```

-----EEEL-----VEAVSLLSQRGPDAL-----LTVALRKPPGQRT
DEELD-----LVIEEVLNIEARGHLF-NSVKRELA-AVLLFEPHCKAGTVL-----
-----FSQGDKG--TSWYIIW
KGSVNVTTHGK----CV-----DHWVWL-----VLQD--
-----V-
-----EAKTMRLEEHGKVVLVLER-----T-----SQG
AG----PSCP-----PTPGRN-----R-YTVMSTGTPKEK
LELLLEA-----MRPDSSAHDPT-ETF-----LS---D-
FLLTHSV--FM-----PSTQLCAALL----HHF----H-
-----AEPA--GGSEQRSTYVCNKRQQILRLVSQ
WVALYGPVLR TD-PVATSFLQ---KLSDL--VSQDA--RLSNLLK--EQ-WPERRR-H
HRL---ENGYGNA--SP-----QM KAR-----NMA-----
-----VW-----LAGQD-----EP-----
-----L-----
---PNSN-----
-----CAIRAGDK--VP-----YD-----
ICRPDH SVLTLQLPV TASVREVMA-----ALA QEDS-----WT-----KEQ--VL
VKVNSA-----G-----DAIGLPDARGVATSLGLNERLFVV
NPQE--V-HKLT-PHPEQL-----GP-----TVGSA
EG--LDLVSAKDLAGQLTDHDWSLFNSIHQVELIH-----YVLGPQHL-RTVTTANLE
RFMRR-----FNELQYWV-----ATELC LCPVP GLR-----AQ LLRKFIK LA AHL
-----KEQKNLNSFFAVMF-GLSNSAVSRLAHTWE-----
-----RLPHKVRKLYSA-LERLL-----DPSWNH---
-RVYRL---ALT K-----LSPPVI-PFMP-----
LLLKDMTFIHEGNH--TL-VE-----N-LINFE-KM
-----RM--MARAVRMLHHC RGHSN-----VPLSPLRS
RVSH LHEDSQASRISTCSEQSLSTR-----S-----PASTWA-----YV
QQLKVIDNQREL-----SR LSREM
-----EP-----
-----
>Rapgef3_[Macaca_fascicularis]_544469453
-----M-----
-----K-----VGWPGES-----
-----CWQVGLAVED-SPALGAPRVGP---LPDVVPEG TLLNMVLRKMHRPRSCSYQ-L
LLE-----HOPP-S-----CIO-----

```

```

-----GLR-----WT-----
-----PLTNSEESLDFSE-SLEQA-----S-----T-----
-----ERVF-----RA-----GRQLH-RQLLATC
PN-L-----IRDRKYH-----L-RLY-----RQC-CS
GR-----ELVDGILALG-----L
----GVH-----SRSQVVGIC---QVLLDEGALC-----
-----H-----VKH-DWAFQDRDAQFYRFPGP
-----EPEP--VGAHEM-----
-----
-----EEEL-----AEAVALLSQRGPDAL-----LTVALRKPPGQRT
DEELD----LIFEELLHIKAVAHLS-NSVKRELA-AVLLFEPHSKAGTVL-----
-----FSQGDKG--TSWYIIW
KGSVNVVTHGK----GL-----VTTLHEG-DDF
GQLAL-----VNDAPRA--ATIILREDNCHFRLVDKQDFNR-----IIKD--
-----V-----
-----
-----EAKTMRLEEHGKVVLVLER-----A-----SQG
AG----PSRP-----PTPGRN-----R-YTVMSTGTPPEKI
LELLLEA-----MGPDSSAHDPT-ETF-----LS---D-
FLLTHRV--FM-----PSAQLCAALL----HHF-----H-
-----AEPA--GGSEQERSTYICNKRQQILRLVSQ
WVALYGSMLHTD-PVATSFLQ---KLSDL--VGRDA--RLSNLLR--EQ-WPERRR-H
HRL---ENGCGNA--SP---QMKA-----NLP-----
----VW-----LPNQD-----EP-----
-----L-----
---PGSS-----
-----
-----
-----
-----CAIRVGDK--VP-----YD-----
ICLPDHSVLTQLPVTASVREVM-----ALAQEDG-----WT-----KEQ--VL
VKVNSA-----G-----DAIGLQPDARGVATSLGLNERLFFV
NPQE---V-HELT-PHPDQL-----GP-----TVGSA
EG--LDLVSAKDLAQQLTDHDSWLFNSIHQVELIY-----YVLGPQHL-RDVTTANLE
RFMR-----FNELQYWV-----ATELCLCPVPGPR-----AQLLRKFIKLAHL
-----KEQKNLNSFFAVMF-GLSNSAISRLAHTWE-----
-----RLPHKVRKLYSA-LERLL-----DPSWNH---
-RVYRL---ALAK-----LSPPVI-PFMP-----
LLLKDMTFIHEGNH--TL-VE-----N-LINFE-KM
-----RM--MARAAARMLHHCRRSHNP-----VPLSPLRS
RVSHLHEDSQVARISTCSEQSLSTR-----S-----PASTWA-----YA
QQLKVIDNQREL-----SRLSREL
-----EP-----

```

-----  
---  
>Rapgef3\_[Macaca\_mulatta]\_966971988  
-----  
-----M-----  
-----  
-----K-----VGWPGES-----  
-----CWQVGLAVED-SPALGAPRVGP---LPDVVPEGTLNLMVLRKMHRRPRSCSYQ-L  
LLE-----HQPP-S-----CIQ-----  
-----GLR-----WT-----  
-----PLTNSEESLDFSE-SLEQA-----S-----T-----  
-----ERVF-----RA-----GRQLH-RQLLATC  
PN-L-----IRDRKYH-----L-RLY-----RQC-CS  
GR-----ELVDGILALG-----L  
-----GVH-----SRSQVVGIC---QVLLDEGALC-----  
-----H-----VKH-DWAFQDRDAQFYRFPGP  
-----EPEP--VGAHEM-----  
-----  
-----EEEL-----AEAVALLSQRGPDAL-----LTVALRKPPGQRT  
DEELD-----LIFEELLHIKAVAHLS-NSVKRELA-AVLLFEPHSGAGTVL-----  
-----FSQGDKG--TSWYIIW  
KGSVNVVTHGK-----GL-----VTTLHEG-DDF  
GQLAL-----VNDAPRA---ATIILREDNCHFLRVDKQDFNR-----IIKD--  
-----V-----  
-----  
-----EAKTMRLEEHGKVVLVLER-----A-----SQG  
AG-----PSRP-----PTPGRN-----R-YTVMSGTPEKI  
LELLLEA-----MGPDSSAHDPT-ETF-----LS---D-  
FLLTHRV--FM-----PSAQLCAALL---HHF-----H-----  
-----AEPA---GGSEQERSTYICNKRQQILRLVSQ  
WVALYGSMLHTD-PVATSFLQ---KLSDL--VGRDA--RLSNLLR---EQ-WPERRR-H  
HRL---ENGCGNA--SP---QMKAR-----NLP-----  
-----VW-----LPNQD-----EP-----  
-----L-----  
---PGSS-----  
-----  
-----  
-----CAIRVGDK--VP-----YD-----  
ICLPDHSVLTQLPVTASVREVMA-----ALAQEDG-----WT-----KEQ--VL  
VKVNSA-----G-----DAIGLQPDARGVATSLGLNERLFVV  
NPQE---V-HELT-PHPDQL-----GP-----TVGSA  
EG--LDLVSADLAGQLTDHDWSLFNSIHQVELIY-----YVLGPQHL-RDVTANLE  
RFMR-----FNELQYWV-----ATELCLCPVPGPR-----AQLLRKFIKLAAHL  
-----KEQKNLNSFFAVMF-GLSNSAISRLAHTWE-----  
-----RLPHKVRKLYSA-LERLL-----DPSWNH---  
-RVYRL---ALAK-----LSPPI-PFMP-----  
LLLKDMTFIHEGNH--TL-VE-----N-LINFE-KM  
-----RM--MARAAARMHHCRRSHNP-----VPLSPLRS  
RVSHLHEDSQVARISTCSEQSLSTR-----S-----PASTWA-----YV  
QQLKVIDNQREL-----SRLSREL  
-----EP-----

-----M-----  
-----K-----VGWPGES-----  
----CWQVGLAVED-SPALGAPRVGP---LPDVVPEGTLLNMVLRKMHRRPRSCSYQ-L  
LLE-----HQRP-S-----CIQ-----  
-----GLR-----WT-----  
----PLTNSEESLDFSE-SLEQA-----S-----T-----  
--ERVL-----RA-----GRQLH-RQLLATC  
PN-L-----IRDRKYH-----L-RLY-----RQC-CS  
GR-----ELVDGILALG-----L-----  
---GVH-----SRSQVVGIC---QVLLDEGALC-----  
-----H-----VKH-DWAFQDRDAQFYRFPGP  
---EPEP--VGAHEM-----  
-----  
-----EEEL-----AEAVALLSQRGPDAL-----LTVALRKPPGQRT  
DEELD-----LIFEELLHIKAVAHLS-NSVKRELA-AVLLFEPHISKAGTVL-----  
-----FSQGDKG--TSWYIIW  
KGSVNVVTHGK---GL-----VTTLHEG-DDF  
GQLAL-----VNDAPRA--ATIILREDNCHFLRVDKQDFNR-----I IKD--  
-----V-----  
-----  
-----EAKTMRLEEHGKVVLVLER-----A-----SQG  
AG----PSRP-----PTPGRN-----R-YTVMMSGTPEKI  
LELLLEA-----MGPDSSAHDPT-ETF-----LS---D-  
FLLTHRV--FM-----PSAQLCAALL----HHF-----H-----  
-----AEPA--GGSEQERSTYICNKRQQILRLVSQ  
WVALYGSMLHTD-PVATSFLQ---KLSDL--VGRDA--RLSNLLR---EQ-WPERRR-H  
HRL---ENGCGNA--SP---QMKAR-----NLP-----  
---VW-----LPNQD-----EP-----  
-----L-----  
---PGSS-----  
-----  
-----  
-----  
-----CAIRVGDK--VP-----YD-----  
ICLPDHSVLTLQLPVTASVREVMA-----ALAQEDG---WT-----KEQ--VL  
VKVNSA-----G-----DAIGLQPDARGVATSLGLNERLFVV  
NPQE--V-HELT-PHPDQL-----GP-----TVGSA  
EG--LDLVSAKDLAQQLTDHDSWLFNGIHQVELIY-----YVLGPQHL-RDVTTANLE

RFMRR-----FNELQYWV-----ATELCLCPVPGPR-----AQLLRKFIKLA AHL  
-----KEQKNLNSFFAVMF-GLSNSAISRLAHTWE-----  
-----RLPHKVRKLYSA-LERLL-----DPSWNH---  
-RVYRL---ALAK-----LSPPVI-PFMP-----  
LLLKDMTFIHEGNH--TL-VE-----N-LINFE-KM  
-----RM--MARAARMLHHCRRSHNP-----VPLSPLRS  
RVSHLHEDSQVARISTCSEQSLESRG-----S-----PAAPGP-----YV  
RQLKVIDNQ RDS-----PGLSREL  
-----EPWEEGAGTKAGGRALVGLETRACGPKYPQACATAGA QASVGV DVESLE  
QAAVGGSVPCVTGG-----

>Rapgef3\_[Mandrillus\_leucophaeus]\_795173402

-----MVL RKMHRPRSCSYQ-L  
LLE-----HQR P-S-----CIQ-----  
-----GLR-----WT-----  
-----PLTNSEESLDFSE-SLEQA-----S-----T-----  
-----ERVL-----RA-----GRQLH-RQLLATC  
PN-L-----IRDRKYH-----L-RLY-----RQC-CS  
GR-----ELVDGILALG-----L  
-----GVH-----SRSQVVGIC---QVLLDEGALC-----  
-----H-----VKH-DWAFQDRDAQFYRFPGP  
-----EPEPEPVGAHEM-----  
-----EEEL-----AEAVALLSQRGPDAL-----LTVALRKPPGQRT  
DEELD-----LIFEELLHIKAVAHLS-NSVKRELA-AVLLFEPH SKAGTVL-----  
-----FSQGDKG--TSWYIIW  
KGSVNVVTHGK-----GL-----VTTLHEG-DDF  
GQLAL-----VNDAPRA--ATIILREDNCHFLRV DKQDFNR-----IIKD--  
-----V-----

-----EAKTMRLEE HGKVVLVLER-----A-----SQG  
AG-----PSRP-----PTPGRN-----R-YTVMSGTPEKI  
LELLLEA-----MGPDSSAHDPT-ETF-----LS---D-  
FLLTHRV--FM-----PSAQLCAALL-----HHF-----H-----  
-----AEPA--GGSEQERSTYICNKRQ QILRLVSQ  
WVALYGSM LHTD-PVATSFLQ---KLSDL--VGRDA--RLSNLLR--EQ-WPERRR-H  
HRL---ENGCGNA--SP-----QMKAR-----NLP-----  
-----VW-----LPNQD-----EP-----  
-----L-----  
---PGSS-----



TG-----PSRP-----PTPGRN-----R-YTVMMSGTPEKI  
 LELLLEA-----MRPDSSAHDPT-ETF-----LS---D-  
 FLLTHSV--FM-----PSAQLCAALL---HHF-----H-----  
 -----VEPAEPAGGSEQERSTYICNKRQQILRLVSQ  
 WVALYGPMLHTD-PVATNFLQ---KLSDL--VSRDA--RLSNLLR--EQ-WPERRR-H  
 HRL---ENGCGNA--SP---MMKAR-----NMP-----  
 ---AW-----LPSQE---EP-----  
 -----L-----  
 ---PSSN-----

```
>Rapgef3 [Maylandia zebra] 499019352
```

```
>Rapgef3 [Mesitornis unicolor] 704529374
```



-----T---PLLDTESTLDYGHSLTQASPERIWRAGKLLFS---H---LSTTR  
PG-L-----IRDHKHHLR-----HH-----RQC-CS  
GK-----ELVDWVLGAG-----L  
----AVQ-----TRSQA VGVC--QVLVDGGVLT-  
-----H-----VKQ-EWHFQDKDSQFYRFAEL  
E----LSPEA-GAGPRDA-----  
  
-----EEL-----LEALAFLAQLGPDAL-----LTMALRKPPAQRT  
EDELE----LIFEELLHIKA VAHLS-NSVKRELA-SVLMFEPHQRVGT V-----  
-----LFSQGDKG--TSWYIIW  
KGSVNVVTHGK--GL-----VATLHEG-DDF  
GQLAL-----VNDAPRA--ATIILREDNCHF LRV DK QDFNR-----ILKD--  
-----V-----  
  
-----EANTMRLKEHGKVVLVLQKNL-----QG  
G-----SSQA-----ATAR-----S-SR-YSVVAGTP EKI  
LEHLL EF-----MR LDATLYD PL-D-----TL LK---RC  
FLLSYT V--FM-----PTSQLCRALL--HHF--R-----  
-----AEPLE--GSEQEKATY TLHKRR K I LR LV SQ  
WVLLYG R LL QGD-RST T ALL Q-----  
  
-----NL A  
DL ASQ-----DP RL GALV-----  
-----QE Q  
-----GOERRRP RT-V E-----  
  
-----NGDG--SV-----SPQP KAQS  
SATWLPSHEEATVTSS-C-----AL RA QDK

-----  
---  
>Rapgef3\_[Mesocricetus\_auratus]\_524925946  
-----  
-----M-----  
-----  
-----K-----VSWPGDN-----  
-----HWQVGPAVVE-SPAVEAPQVES-----LPDVVPEDTLLNMVLKRMHRPRCCSYQ-L  
VFE-----HRRP-S-----CIQ-----  
-----GLR-----WT-----  
-----PLTNSEESLDFSV-SLEQA-----T-----T-----  
-----ERVL-----KA-----GRLLH-RHLLATY  
PT-L-----IRDRKYH-----L-RLY-----RQC-CS  
GR-----ELVDGILALG-----L  
-----GVH-----SRSQAVGIC---QVLLDEGALC-----  
-----H-----VKH-DWTFQDRDAQFYRFPGP  
-----EPEP--VGTHDV-----  
-----  
-----EEEL-----VEAMALLSQRGPDAL-----LTVALRKPPGQRT  
DEELD-----LIFEELLHIKAVAHLS-NSVKRELA-AVLLFEPHSGAGTVL-----  
-----FSQGDKG--TSWYIIW  
KGSVNVVTHGK-----GL-----VTTLHEG-DDF  
GQLAL-----VNDAPRA---ATIILRENNCHFLRVDKQDFNR-----IIKD--  
-----V-----  
-----  
-----EAKTMRLEEHGKVVLVLER-----S-----SQG  
TG-----PSRP-----PTPGRN-----R-YTVMSGTPEKI  
LELLLEA-----MRPDSSAHDPT-ETF-----LS---D-  
FLLTHSV--FM-----PSAQLFTALL---HHF-----H-----  
-----VEPAEPAGGSEQERNTYVCNKRQQIILRLVSR  
WVALYGPM LHS D-PVATSFLQ---KLSDL--VSRDA--RLSNLLK---EQ-CPERRR-H  
HRL---ENGCGNA--SP---QTKAR-----NAP-----  
-----VW-----LPNQE-----EP-----  
-----L-----  
---PSST-----  
-----  
-----  
-----GAIRVGDK--VP-----YD-----  
ICRPDHSVLTQLPVTASVREVMA-----ALAHEDH-----WT-----KGQ--VL  
VKVNSA-----G-----DVVGLQPDARGVATSLGLNERLFFV  
DPQE---V-HELT-PHPEQL-----GP-----TLGSS  
DM--LELVSAKDLAQQLTDHDWNLFNRIHQVELIH-----YVLGPQHL-RDVT TANLE  
RFMR-----FNELQYWV-----ATELCLCSVPGPR-----AQLLRKFIKLAAHL  
-----KEQKNLNSFFAVMF-GLSNSAISRLAHTWE-----  
-----RLPHKVRKLYSA-LERLL-----DPSWNH---  
-RVYRL---ALTK-----LSPPVI-PFMP-----  
LLLKDMTFIHEGNH--TL-VE-----N-LINFE-KM  
-----RM--MARAVRMLHHC RSHST-----VPLSPLRS  
RVSHIHEDSQASRISTCSEQSLSTR-----S-----PANTWA-----YV  
QQLKVIDNQREL-----SRLSREL  
-----EP-----







AG-----SSCP-----PTPGRN-----R-YTVMMSGTPEKI  
LELLLLLEA-----MRPDSSAHDPT-ETF-----LS---D-  
FLLTHRV--FM-----PSTQLCAALL----HHF-----H-----  
-----AEPT---GGSEQERNTYICNKRQQILRLVLSQ  
WVALYGPMLHTD-PVASSFLQ---KLSDL--VSRDA--RLSNLLR---EQ-WPERRR-H  
HRL---ENGCGNT--SP---QIKAR-----NMP-----  
----VW-----LPGQD-----EP-----  
-----L-----  
---PSSN-----  
-----  
-----  
-----  
-----CAIRVGDK--VP-----YD-----  
ICRPDHSVLTLQLPVTASVREUMA-----ALAQEDG---WT-----KGQ--VL  
VKVNSA-----G-----DAIGLQPDARGVATSLGLNERLFFV  
NPQE--V-HELT-PHPEQL-----GP-----TVGSA  
EG--LDLVSAKDLAQQLTDHDWNLFNSIHQVELIH-----YVLGPQHL-RDVTTANLE  
RFMR-----FNELQYWV-----ATELCLCPVPGPR-----AQLLRKFIKLAHL  
-----KEQKNLNSFFAVMF-GLSNSAISRLAHTWE-----  
-----RLPHKVRKLYSA-LERLL-----DPSWNH---  
-RVYRL---ALTK-----LSPPVI-PFMP-----  
LLLKDMTFIHEGNH--TL-VE-----N-LINFE-KM  
-----RM---MARAVRMLHHCRRSHN-----VPLSPLRS  
RVSHLHEDGQAARISTCSEQSLSTR-----S-----PASTWA-----YV  
QQLKVINNQREL-----SRLSREL-----  
-----EP-----

```

-----M-----
-----TSPSPEDAKPGVVVG-----RSSSSG
RWL----SSFLPTSQ-----VSWPGEN----
----HWQVGPAVVE-SPAVGAPQVGG----LPDVVPEGTLLNMVLKRMHRPRCCSYQ-L
VFE-----HRRP-S-----CIQ-----
-----GLR-----WT-----
-----PLTNSEDSLDFRV-SLEQA-----T-----T-----
-----EHVH-----KA-----GKLLH-RHLLATY
PT-L-----IRDRKYH-----L-RLY-----RHC-CS
GR-----ELVDGILALG-----L
----GVH-----SRSQAVGIC--QVLLDEGALC-----
-----H-----VKH-DWTFQDRDAQFYRFPGP
-----EPEP--TGTODV-----

```

```

-----EEEL-----VEAMALLSQRGPDAL-----LTVALRKPPGQRT
DEELD-----LIFEELLHIKAVAHLS-NSVKRELA-AVLLFEPHSGAGTVL-----
-----FSQGDKG--TSWYIIW
KGSVNVVTHGK----GL-----VTTLHEG-DDF
GQLAL-----VNDAPRA---ATIIILRENNCHFLRVDKQDFNR-----I IKD--
-----V-----
-----EAKTMRLEEHGKVVLVLER-----T-----SQQ
AG----PSRP-----PTPGRN-----R-YTVMMSGTPBK
LELLLEA-----MRPDSSAHDPT-ETF-----LS---D-
FLLTHSV--FM-----PSTQLFTALL---HHF-----H-
-----VEPADPAGGSEQEHSTYICNKRQQILRLVGR
WVALYSPMLHSD-PVATSFLQ---KLSDL--VSRDA--RLSNLLR--EQ-YPERRR-H
HRL---ENGCGNV--SP-----QTKAR-----NAP-----
-----VW-----LPNQE-----EP-----
-----L-----
---PSSA-----
-----GAIRVGDK--VP-----YD-----
ICRPDHSLVTLHLPTASVREVMA-----ALAHEDH----WT-----KGQ--VL
VKVNSA-----G-----DVVGLQPDARGVATSLGLNERLFVV
DPQE--V-HELT-PHPEQL-----GP-----TLGSS
EM--LDLVSAKDLAGQLTDHDWNLFNRIHQVELIH-----YVLGPQHL-RDVTANLE
RFMRR-----FNELQYWV----ATELCCLCPVPGSR-----AQLLRKFIKLA AHL
-----KEQKNLNSFFAVMF-GLSNSAISRLAHTWE-----
-----RLPHKVRKLYSA-LERLL-----DPSWNH---
-RVYRL---ALTK-----LSPPVI-PFMP-----
LLLKDVTFIHEGNH--TL-VE-----N-LINFE-KM
-----RM--MARAVRMLHHCSSHST-----APLSPLRS
RVSHIHEDSQGSRICTSEQSLSTR-----S-----PASTWA-----YV
QQLKVIDNQREL-----SRLSREL
-----EP-----
-----
>Rapgef3_[Mustela_putorius_furo]_511891954
-----M-----
-----K-----VGWPGES
-----RWQVGLAVDD-TPSLGAAQVGG---LPDVVPEGTLFNMVLKRVRPRSCSYQ-L
LLE-----HORP-S-----RIO-----

```

```

-----GLR-----WT-----
-----PLTDSEESLDFSV-SLEQA-----S-----A-----
-----ERVL-----RA-----GKQLH-RHLLATC
PT-L-----IRDRKYH-----L-RLY-----RQC-CS
GR-----ELVDGILALG-----L
----GVQ-----SRSQAVGIC---QVLLDEGALY-----
-----H-----VKH-DWTFQDRDTQFYRFPGP
-----EPET--AGVREL-----
-----
-----EEEL-----VEAVALLSQRGPDAL-----LTVALRKPPGQRT
DEELD----LIFEELLHIKAVAHLS-NSVKRELA-AVLLFEPHSKAGTVL-----
-----FSQGDKG--TSWYIIW
KGSVNVVTHGK----GL-----VTTLHEG-DDF
GQLAL-----VNDAPRA--ATIILREDNCHFRLVDKQDFNR-----IIKD--
-----V-----
-----
-----EAKTMRLEEHGKVVLVLER-----A-----SQG
AG----PSRP-----PTPGRN-----R-YTVMSGTPEKI
LELLLEA-----MRPDSSTHDPT-ETF-----LS---D-
FLLTYSV--FM-----PSAQLCAALL----HHF-----H-
-----AEPS--GGSEQENSTYICNKRQQILRLVSQ
WMALYGPM LHAD-PVATSFLQ---KLSDL--VSRDT--RLCLLL--EQ-WPERRR-H
HRL---ENGCGNA--SP---QMKTR-----NMP-----
----VW-----LPGQD-----QP-----
-----L-----
---PSRN-----
-----
-----
-----
-----CAIRAGDK--VP-----YD-----
ICRPDHSVLT LKLPVTASVREVM-----ALAQEDG-----WT-----KGQ--VL
VKVNSA-----G-----DAIGLQPEARGVATSLGLNERLFVV
NPQE---V-HELT-PHPEQL-----GP-----TMGSA
EG--LDLVSAKDLAQ L TDH DWSLFNSIHQVELIH-----YVLGPQHL-RDVT TANLE
RFMR-----FNELQYWV-----ATELCLCPVPGLR-----AQLLRKFIKLAHL
-----KEQKNLNSFFAVMF-GLSNSAISRLAHTWE-----
-----RLPHKVRKLYSA-LERLL-----DPSWNH---
-RVYRL---ALTK-----LSPPII-PFMP-----
LLLKDMTFIHEGNH--TL-VE-----N-LINFE-KM
-----RM--MARAVRMLQHCRSHSN-----VPLSPLRS
RVSHLHEDSQVARMSTCSEQSLSTR-----S-----PASPWA-----YV
QQLKVIDNQREL-----SRLSREL
-----EP-----

```



-----  
---  
>Rapgef3\_[Myotis\_brandtii]\_554566307  
-----  
-----M-----  
-----  
-----K-----VGWPGES-----  
-----RWQVGLFVED-SPALGAPQVGS-----LPDVVPEGTLNLMVLRRMHLPRSCSYR-L  
LLE-----HQRP-S-----RIQ-----  
-----GLR-----WT-----  
-----PLTNSEESLDFSV-SLEQA-----S-----T-----  
-----ERVL-----RA-----GKQLH-RHLLATC  
QN-L-----IRDRKYH-----L-RLY-----RQC-CS  
GR-----ELVDGILALG-----L  
-----GVH-----SRSQAVGIC---QVLLDEGALC-----  
-----H-----VKH-DWTFQDRDTQFYRFPGP  
-----EPEP--SGVHEL-----  
-----  
-----EEEL-----VEAMALLSQRGPDAL-----LTVALRKPPGQRT  
DEELE-----LIFEELLHIKAVAHLS-NSVKRELA-AVLLFEPHSGAGTVL-----  
-----FSQGDKG--TSWYIIW  
KGSVNVVTHGK-----GL-----VTTLHEG-DDF  
GQLAL-----VNDAPRA---ATIILREDNCHFLRVDKQDFNR-----IIKD--  
-----V-----  
-----  
-----EAKTMRLEEHGKVVLVLER-----T-----SQG  
AA-----SSCP-----PTPGRN-----R-YTVMSGTPEKI  
LELLLEA-----MRPDSSAHDPT-ETF-----LS---D-  
FLLTHRV--FM-----PSTQLCTALL---HHF-----H-----  
-----AEPA---GGSEQERNIYICNKRQQIILRLVSQ  
WVALYGPM LHTD-PVASSFLQ---KLSDL--VSKDA--RLSNLLR---EH-WPERRR-H  
HRM---ENGGGSA--SP---QIKAR-----NMS-----  
-----VW-----LPGPD-----ES-----  
-----L-----  
---PSSN-----  
-----  
-----  
-----CAIRVGDK--VP-----YD-----  
ICRPDHSVLTQLPVTASVREVMA-----ALAQEDG-----WT-----KGQ--VL  
VKVNSA-----G-----DAIGLQPDARGVATSLGLNERLFVV  
NPEE---V-HELT-PHPEQL-----GP-----TVGSA  
EG--LDLVSAKDLAVQLTDHDWNLFNSIHQVELIH-----YVLGPQHL-RDVTTANLE  
RFMR-----FNELQYWV-----ATELCLCPVPGPR-----AQLLRKFIKLAAHL  
-----KEQKNLNSFFAVMF-GLSNSAISRLAHTWE-----  
-----RLPHKVRKLYSA-LERLL-----DPSWNH---  
-RVYRL---ALTK-----LSPPI-PFMP-----  
LLLKDMTFIHEGNH--TL-VE-----N-LINFE-KM  
-----RM--MARAVRMLHHCRRSHN-----VPLSPLRS  
RVSHLHEDIQAARVSTCSEQSLSTR-----S-----PASTWA-----YV  
QQLKVIDNQREL-----SRLSREL-----  
-----EP-----







[illegible]



-----MFMKF-----L-----S-----  
-----DRVV-----KA-----ARSVY-SVLMERD  
SN-L-----IRDRKHH-----L-KTY-----RQC-CS  
GK-----ELVDWLMKQN-----E  
----CLA-----SRSQAVGMW--QVLLDEGILV-----  
-----H-----VKH-ELNFLDKDTQFYRFQEC  
-----EFGLHHVSDERE-----  
-----E-----  
-----EEL-----QEAVSLLAQLGPDAL-----LTMILRKGPSQNS  
GLGLLNWPLFCVYTDDAGIFALALIG-----

-----  
---  
>Rapgef3\_[Ochotona\_princeps]\_504177543  
-----  
-----  
-----  
-----MVRVRVGFQQLLSKQGSCGPS-----  
-----SFRDGPAAKVG---LADLPPEAQLLVAV-RRMRRPRSCSYQ-L  
LLPP-----HGRP-G-----RVQ-----  
-----GLR-----WT-----  
-----PLTASEESLDFSG-SLEQA-----S-----T-----  
-----ERVL-----RA-----GKQLY-RHLLAAC  
PG-L-----IRDRKHH-----L-RLY-----RQC-CS  
GQ-----ELVDGILTGL-----L  
-----AVH-----SRSQAVGIC---QVLLDEGALY-----  
-----H-----VKH-DWAFQDRDAQFYRFPWL  
-----ELEP--TGSPGA-----  
-----  
-----EEEL-----VEAMALLAQRGPDAL-----LTMALRKPPNQRT  
HEELE-----LIFEELLHIKAVAHLS-NSVKRELA-AVLLFEPHSGAGTVL-----  
-----FSQGDKG--TSWYIIW  
KGSVNVVTHGK-----GL-----VTTLHEG-DDF  
GQLAL-----VNDAPRA---ATIILREDSCHFLRVDKQDFNR-----IIKD--  
-----V-----  
-----  
-----EAKTMRLEEHGKVVLVLER-----A-----SQG  
AS-----PACP-----PTPGRT-----R-YTVMSGTPEKI  
LELLLEA-----MRPDSSSHDPT-ETF-----LS---D-  
FLLTHSV--FM-----PSAQLCPALL---HHF-----H-----  
-----AQPA---GGSEQERSYVCNKRQQIVRLVNQ  
WVALYGPMLHVD-PAASNFLQ---GFSEL--VSGDV--QLSGLLK---GQ-WPERRR-L  
HRL---ENGCGNA--SP---QLKAW-----NAP-----  
-----VW-----LPSHE-----EP-----  
-----L-----  
---PSSN-----  
-----  
-----  
-----  
-----CAIRAGDK-VS-----YN-----  
IYRPDHSGLTLQLPVTASVREVL-----ALAQADG-----RT-----SGQ--VL  
VKVNSA-----G-----DAVGLQPEARGVATSLGLNERLFVA  
NPQQ---V-HELT-PHPEQL-----GP-----TVGSA  
EA--LELVSAKDLAQQLTEQDRDLFHSIHQVELIH-----YVLGPQHL-RNVTANLE  
RFMR-----FNQLQYWV-----ATELCLCPLPGPR-----AQLLRKFILKAAHL  
-----KEQKNLSFFAIMF-GLSNSAITRLARTWE-----  
-----RLPQKVRKLHSA-LERLL-----DPSWNH---  
-RAYRV---ALAK-----LSPPI-PFMP-----  
LLKDMTFIHEGSR--TL-VE-----N-LINFE-KM  
-----RM---LARAVRVLHHCQGHG-----APLSPLRT  
RAAHIHEDSQASRISTCSEQSLSTR-----N-----PASAWA-----DI  
QQLKVIDNQREL-----SRLSREL  
-----EP-----





RVLR-----FNELQYVW----ATELCLCSAPGLR-----AQLLRKFIKLA AHL  
-----KEQKNLNSFFAVMF-GLSNSAISRLARTWE-----  
-----RLPQKVRKLYSA-LERLL-----DPSWNH---  
-RVYRL---ALRK-----LSPPLI-PFMP-----  
LLLKDMTFIHEGNR--TL-VD-----S-LINFE-KM  
-----RM--MARAA RLLHYCRSHST-----APLSPLRS  
RVSHLHEDSQALRMSTCSEQSLSTR-----S-----PASTWA-----YI  
QQPKVIDNQREL-----SRLSREL  
-----EP-----

```
>Rapgef3 [Odobenus rosmarus divergens] 823398553
```

```

-----EDEL-----VEAVALLSQRGPDAL-----LTVALRKPPGQRT
DEELD-----LIFEELLHIKAVAHLS-NSVKRELA-AVLLFEPHSHKAGTVL-----
-----FSQGDKG--TSWYIIW
KGSVNVVTHGK-----GL-----VTTLHEG-DDF
GQLAL-----VNDAPRA--ATIILREDNCHFLRVDKQDFNR-----IIKD--
-----V-----

```



G-----SNQP-----ATAR-----S-SR-YLVMAGTPEKI  
LEHLLLEF-----MRLDAT-HVPT-D-----TLLG---D-  
FLLTYTV--FM-----PTSQLCRALL-----HHF-----R-----  
-----AEPLE---GSEQEKATYSLHKRRKILRLVSQ  
WVLLYGRLLQGD-RSTTALLQ---G-PG--AGRGTP--HPEQLGP--HV-SSSETL--  
D-----

-----LISSKDLASHLTDYDWNLFKRIHQVEMIH-----YIVGPQKF-HDVT TANLE  
RVMRR-----FNELQYWV-----ATELCLCPEVGR-----AQLLRKFIKLA AHL  
-----KEQKNLNSFFAVMF-GVSNTAVSRLAKTWE-----  
-----HMAKTVRV-LQ-----

-----RCRG--QA-----HAPLSPLRN  
RSPHRPEDPKAVRIST-----  
-----Y-----CLQS  
----PGWL----AKSVDVSRGFPPGGRL-----

```
>Rapgef3 [Orcinus orca] 466031722
```

-----K-----VSWPGES-----  
 -----RWQVGLAVED-SSVLGAPPVGG-----LPDVVPEGTLFNMVLRRMHRSRSCSYQ-L  
 LLE-----HQRP-S-----CIQ-----  
 -----GLR-----WT-----  
 -----PLANSEESLDFSV-SLEQA-----S-----T-----  
 -----ERVL-----RA-----GRQLH-RHLLATC  
 PN-L-----IRDRKYH-----L-RLH-----RQC-CS  
 GR-----ELVDGILALG-----L-----  
 -----GVH-----SRSQAVGIC---QVLLDEGALC-----  
 -----H-----VKH-DWAFQDRDTQFYRFPGP  
 -----EPEP--AGLHEL-----

[illegible]

```

-----GIS-----WT-----
-----PLPEALNS---KD-TMKQ-----FLS-----
-----DRVV-----KA-----ARSVY-SVMIEKN
PG-L-----IRDRKHH-----L-KTY-----RQC-CS
GK-----DLVDWLMTQN-----E
---GLQ---SRSQAVGIW---QVLVDEGILL-----
-----H-----VKH-ELNFLDKDQTQFYRFQDS
-----QFGLNHISNEK-----
DS-----
-----EDEL-----QEALSLLSQLGPDAL-----LTMILRKCPQRS
PEDLE----VIYEELLHVKAAAHLS-SSVRKELA-AVLVFESHAKAGTVL-----
-----FSQGDKG--TSWYIIW
KGSVNVITHGK----GL-----VTTLHEG-EDF
GQLAL-----LNEQPRA--ATIILREDNCHFRLVDKQDFIR-----ILKD--
-----V-----
-----
-----EANTVRLEEKGKTVLVLEK-----S-----
AD---STEQG-----GAGNSS-----K-YTVMSTGTPKEI
LEHLLT-----IKLESNGNDAL-DC-----CVS---D-
FLLTHKV--FM-----PSSQLCHALQ---HHY---Q-
-----AQLAE--GSEQEKTAYVLNIKQKVVLVGQ
WVALFGLHLKED-PIALDFLE---RLKKD--MAANS--QLFNVLK--D--FRERRR--
TKV---SENGYQSL--S-----R-N-HQFD-----
-----W-----FSNFE-----ES-----
-----
---VGRV-----
-----
-----
-----
-----QPIRAHDK--VL-----YE-----
IYRPDNKPLTLMLPVNTSVQEIMS-----ALGKTG-----EDH--VL
IKMNST-----G-----ERAQLKLDATAVYTALGLNERLFIC
TISE---M-EQLT-PLKEQQ-----GP-----EQGTT
DV--LEQMSSKDIASELTNYDWELFTAMHEVELVY-----YIFGRHKF-PGAI TANLE
RFVRR-----FNEVQHWV-----LTELCLEDLVR-----AMLLKKFIKIASVL
-----KEQKNLNSFFAVMF-GLSNSAIQRLYKTWE-----
-----RIPSKTKRIYCS-LERLM-----DPSRNH-
-RAYRL---AIAK-----LSPPYI-PFMP-----
LLLKDMTFIHEGNA--NY-VD-----K-LVNFE-KM
---RM---LAKTVKIVRGCRSQPY-----VASSPQRG
LADRMFLEGAATRLSTYSDHALPLR-----T-----STNIRH----YI
QNLKVIDNQRL-----TQLSRTI
-----DC-----

```

```
>Rapgef3_[Ornithorhynchus_anatinus]_620972164
```





RFMRR-----FNELQYVW----ATELCLCPVPSLR-----AQLLRKFIKLA AHL  
-----KEQKNLNSFFAVMF-GLSNSAISRLAHTWE-----  
-----RLPHKVRKLYSA-LERLL-----DPSWNH---  
-RVYRL---ALTK-----LSPPVI-PFMP-----  
LLLKDMTFIHEGNH--TL-VE-----N-LINFE-KM  
-----RM--MARAVRMLHQCRSHSN-----VPLSPLRS  
RVSHLHEDSQAARISTCSEQSLSTR-----S-----PANTWA-----YV  
QQLKVIDNQREL-----SRLSREL  
-----EP-----



TQ-----SARQG-----SAGTNS-----K-YTVMMSGTPEKI  
LEHLLLET-----IKLDSNGYDPI-DP-----CVI---D-  
FLLTHKV--FM-----PTSQLCPALQ-----HHY-----Q-----  
-----AELSE--GSEQEKDAYIIDTKQKVVVKLISH  
WVAVYGFLLED-PVAMDFLEA---MKKE--VAADS--RLSGMLK--EQ-YRERRR-  
TKV---LENGHHSL--S-----R-N-QHFD-----  
-----W-----FSNCD-----EA-----  
-----  
---LGRI-----  
-----  
-----  
-----  
-----  
-----QPIKAKDK--IL-----YE-----  
IYRPDHKALTLMLPVDSPVQDVLS-----GVVEPG-----GGH--VL  
VKMNST-----G-----DRAELKLEASAVYTALGLNERLFIC  
TSSE--V-EHLR-PLKEQQ-----GP-----EQGTT  
DI--LEQIGSKDMAAELTNFDWELFTAVHEVELVY-----YIFGRNKF-PGAI TANLE  
RFVRH-----FNKLQYWV-----VTELCLCEDLMKR-----ALLLKKFIKIASVL  
-----KEQKNLNSFFAVMF-GLSNSAVQRLYKTWE-----  
-----RIPSKI KRIYCT-YERLM-----DPSRNH---  
-RAYRL-----AVAK-----LNPPYI-PFMP-----  
LLLKDMTFIHEGNP--SY-VD-----K-LVNFE-KM  
-----RM--LAKTVNIVRGCRSQPY-----VPSSPQRG  
LADRMFLEGPATRLSTYSDSL PQR-----S-----PTNIRL-----YI  
QNLKVIDNQRL-----TQRSRAL  
-----EC-----

-----MVLRRMHRPRSCSYQ-L  
LLE-----HRRP-S-----RIQ-----  
-----GLR-----WT-----  
-----PLTNSEESLDFSV-SLEQA-----S-----T-----  
-----ERVL-----RA-----GKQLQ-RHLLATC  
PN-L-----IRDRKYH-----L-RLY-----RQC-CS  
GR-----ELVDGILSLG-----L-----  
----GVH-----SRSQAVGIC--QVLLDEGALC-----  
-----H-----VKH-DWTFQDRDAQFYRFPGP  
-----EPEP--TGAHEM-----

```

-----EEL-----VEAMALLSQRGPDAL-----LTVALRKPPGQRT
DEELD-----LIFEELLHIKAVAHLS-NSVKRELA-AVLLFEPHISKAGTVL-----
-----FSQGDKG--TSWYIIW
KGSVNVVTHGK----GL-----VTTLHEG-DDF
GQLAL-----VNDAPRA--ATIILREDNCHFLRVDKQDFNR-----IIKD-----
-----V-----

```

```

-----EAKTIRLEEKGKVVVLVLER-----A-----SQG
AG-----SSRP-----PTPGRN-----R-YTVMMSGTPEKI
LELLLEA-----MRPDSSAHDPT-ETF-----LS---D-
FLLTHSV--FM-----PSAQLCAALL----HHF-----H-----
-----AEPT--GGSEQERSTYICNKRQQILQLVLSQ
WVALYGSMLHAD-PVATSFLQ---KLSDL--VSRDV--RLSNLLR--EQ-WPERRR-H
HRL---ENGYGNA--SP-----QMKAP-----NVP-----
-----IW-----LPSQD-----EP-----
-----L-----
---PSSN-----

```

```

-----CAIRAGDK--VS-----YD-----
ICRPDHSVLTQLPVTASVREVMV-----ALAQEDS-----WT-----KGQ--VL
VKINSA-----G-----HVTGLQPDARGVATSLGLNERLFVV
NPQE--V-HVLT-PHPEQL-----GP-----SVGSA
EG--LDLVSAKDLAQQLTDHDWNLFNSIHQVELIH-----YALGPQHL-RDVT TANLE
RFMRR-----FNELQYWV-----ATELCLCPVPGPR-----AQLLRKFIKLA AHL
-----KEQKNLNSFFAVMF-GLSNSAISRLAHTWE-----
-----RLPHKVRKLYSA-LERLL-----DPSWNH--
-RVYRL---ALAK-----LSPPAI-PFMP-----
LLLKDMTFIHEGNH--TI-VE-----N-LINFE-KM
-----RM--MARAVRMLHHCGRHSS-----VPLSPLRT
RVSHFHEDNQVARISTCSEQSLSTR-----S-----PASTWA-----YV
QQLKVINNQREL-----SRLSREL
-----EP-----

```

[illegible]

```
>Rapgef3 [Ovis aries musimon] 803304007
```

-----MVLRRMYRSRSCSYQ-L  
LLE-----HORP-S-----CIO-----

```

-----GLR-----WT-----
-----PLTSSEESLDFSV-SLEQA-----S-----T-----
-----ERVL-----RA-----GKQLH-RHLLANC
PN-L-----IRDRKYH-----L-RLH-----RQC-CS
GR-----ELVDGILALG-----L
----GVH-----SRSQAVGIC---QVLLDEGALC-----
-----H-----VKH-DWAFQDRDTQFYRFPGP
-----EPEP--VGAHEL-----
-----
-----EEEL-----VEALALLSQRGPDAL-----LTVALRKPPGQRT
DEELD----LIFEELLHIKAVAHLS-NSVKRELA-AVLLFEPHSKAGTVL-----
-----FSQGDKG--TSWYIIW
KGSVNVVTHGK----GL-----VTTLHEG-DDF
GQLAL-----VNDAPRA--ATIILGEDNCHFRLRVDKQDFNR-----IIKD--
-----V-----
-----
-----EAKTMRLEEHGKVVLVLER-----T-----SQG
TG----PSRP-----PTPGGN-----R-YTVMSTGTPPEKI
LELLLEA-----MRPDSSAHDPT-ETF-----LS---D-
FLLTHSV--FM-----PTAQLCAALL----HHF-----H-
-----AEPA--GGSEQERSSYVCNKRQQILRLVSQ
WVTLYGPTLRD-PVATSFLK---KLSDL--VSRDA--RLSNLLR--EQ-WPERRR-H
HRL---ENGCGNA--SP---QMKAR-----NVP-----
----VW-----LPSQD-----EP-----
-----L-----
---PSNS-----
-----
-----
-----
-----CAIRVGDK--VP-----YD-----
ICRPDHSVLTQLPVTASVREVM-----ALAQEDG-----WT-----KGQ--VL
VKVNSA-----G-----DAIGLQPDARGVATSLGLNERLFVV
NPQE--V-HKLT-PHPEQL-----GP-----TVGSA
EG--LDLVSTKDLAQQLTDHDSWLSFNISIQVELIH-----YVLGPQHL-RDVTTANLE
RFMR-----FNELQYWV-----ATELCLCSVPGLR-----AQLLRKFIKLAHL
-----KEQKNLNSFFAVMF-GLSNSAISRLAHTWE-----
-----RLPHKVRKLYSA-LERLL-----DPSWNH--
-RVYRL---ALTK-----LSPPLI-PFMP-----
LLLKDMTFIHEGNH--TL-VE-----N-LINFE-KM
-----RM--MARAAARMLHHCRRSHN-----VPLSPLRS
RVSHLHEDSQAVRVSTCSEQSLSTR-----S-----PASTWA-----YV
QQLKVIDNQREL-----SRLSREL
-----EP-----

```

-----  
---  
>Rapgef3\_[Ovis\_aries]\_803044449  
-----  
-----M-----  
-----  
-----K-----VGWPGES-----  
-----RWQVGLAVEG-DSILGAPPLGG-----LPDVVPEGTLLNMVLRRMYRSRSCSYQ-L  
LLE-----HQRP-S-----CIQ-----  
-----GLR-----WT-----  
-----PLTSSEESLDFSV-SLEQA-----S-----T-----  
-----ERVL-----RA-----GKQLH-RHLLANC  
PN-L-----IRDRKYH-----L-RLH-----RQC-CS  
GR-----ELVDGILALG-----L  
-----GVH-----SRSQAVGIC---QVLLDEGALC-----  
-----H-----VKH-DWACQDRDTQFYRFPGP  
-----EPEP--VGAHEL-----  
-----  
-----EEEL-----VEALALLSQRGPDAL-----LTVALRKPPGQRT  
DEELD-----LIFEELLHIKAVAHLS-NSVKRELA-AVLLFEPHSGAGTVL-----  
-----FSQGDKG--TSWYIIW  
KGSVNVVTHGK-----GL-----VTTLHEG-DDF  
GQLAL-----VNDAPRA---ATIILGEDNCHFLRVDKQDFNR-----IIKD--  
-----V-----  
-----  
-----EAKTMRLEEHGKVVLVLER-----T-----SQG  
TG-----PSRP-----PTPGGN-----R-YTVMSGTPEKI  
LELLLEA-----MRPDSSAHDPT-ETF-----LS---D-  
FLLTHSV--FM-----PTAQLCAALL---HHF-----H-----  
-----AEPA---GGSEQERSYVCNKRQQIILRLVSQ  
WVTLYGPTLRTD-PVATSFLK---KLSDL--VSRDA--RLSNLLR---EQ-WPERRR-H  
HRL---ENGCGNA--SP-----QMKAR-----NVP-----  
-----VW-----LPSQD-----EP-----  
-----L-----  
---PSNS-----  
-----  
-----  
-----CAIRVGDK--VP-----YD-----  
ICRPDHSVLTQLPVTASVREVMA-----ALAQEDG-----WT-----KGQ--VL  
VKVNSA-----G-----DAIGLQPDARGVATSLGLNERLFVV  
NPQE---V-HKLT-PHPEQL-----GP-----TVGSA  
EG--LDLVSTKDLAQQLTDHDWSLFNSIHQVELIH-----YVLGPQHL-RDVTTANLE  
RFMR-----FNELQYWV-----ATELCLCSVPGLR-----AQLLRKFIKLAHL  
-----KEQKNLNSFFAVMF-GLSNSAISRLAHTWE-----  
-----RLPHKVRKLYSA-LERLL-----DPSWNH---  
-RVYRL---ALTK-----LSPPLI-PFMP-----  
LLLKDMTFIHEGNH--TL-VE-----N-LINFE-KM  
-----RM--MARAAARMHLHCRSHSN-----VPLSPLRS  
RVSHLHEDSQAVRVSTCSEQSLSTR-----S-----PASTWA-----YV  
QQLKVIDNQREL-----SRLSREL  
-----EP-----











```

-----EEEL-----VEALALLSQRGPDAL-----LTVALRKPPGQRT
DEELD-----LIFEELLHIKAVAHLS-NSVKRELA-AVLLFEPHSGAGTVL-----
-----FSQGDKG--TSWYIIW
KGSVNVVTHGK-----GL-----VTTLHEG-DDF
GQLAL-----VNDAPRA---ATIILGEDNCHFRLRVDKQDFNR-----I IKD--
-----V-----
-----EAKTMRLEEHGKVVLVLER-----T-----SQQ
TG----PSRP-----PTPGGN-----R-YTVMMSGTPEK
LELLLEA-----MRPDSSAHDPT-ETF-----LS---D-
FLLTHSV--FM-----PTAQLCAALL-----HHF-----H-
-----AEPA--RGSEQERSSYVCNKRQQILRLVSQ
WVTLYGPTLR TD-PVATSFLK---KLSDL--VSRDA--RLSNLLR--EQ-WPERRR-H
HRL---ENGCGNA--SP-----QM KAR-----NVP-----
-----VW-----LPSQD-----EP-----
-----L-----
---PSSN-----
-----
-----CAIRVGDK--VP-----YD-----
ICRPDH SVLTLQLPV TASVREVMA-----ALA QEDG----WT-----KGQ--VL
VKVNSA-----G-----DAIGLPDARGVATSLGLNERLFVV
NPQE--V-HKLT-PHPEQL-----GP-----TVGSA
EG--LDLVSTKDLAQ L TDHDWSLFNSIHQVELIH-----YVLGPQHL-RDVTAA NLE
RFMRR-----FNELQYWV-----ATELC LCSVPGLR-----AQLLRKF I KLA A HL
-----KEQKNLNSFFAVMF-GLSNSAISRLAHTWE-----
-----RLPHKVRKLYSA-LERLL-----DPSWNH---
-RVYRL---ALTK-----LSPPLI-PFMP-----
LLLKDMTFIHEGNH--TL-VE-----N-LINFE-KM
-----RM--MARAA RMLHHC RS HS N-----VPLSPLRS
RVSH LHEDSQAVRVSTCSEQSLSTR-----S-----PASTWA-----YV
QQLKVIDNQREL-----SRLSREL
-----EP-----
-----
>Rapgef3_[Papio_anubis]_402885758
-----M-----
-----K-----VGWPGES-----
-----CWQVGLAVED-SPALGAPRVGP---LPDVVPEG TLLNMVLRKMHRPRSCSYQ-L
LLE-----HORP-S-----CIO-----

```

```

-----GLR-----WT-----
-----PLTNSEESLDFSE-SLEQA-----S-----T-----
-----ERVL-----RA-----GRQLH-RQLLATC
PN-L-----IRDRKYH-----L-RLY-----RQC-CS
GR-----ELVDGILALG-----L
----GVH-----SRSQVVGIC---QVLLDEGALC-----
-----H-----VKH-DWAFQDRDAQFYRFPGP
-----EPEPEPVGAHEM-----
-----
-----EEEL-----AEAVALLSQRGPDAL-----LTVALRKPPGQRT
DEELD----LIFEELLHIKAVAHLS-NSVKRELA-AVLLFEPHISKAGTVL-----
-----FSQGDKG--TSWYIIW
KGSVNVVTHGK----GL-----VTTLHEG-DDF
GQLAL-----VNDAPRA--ATIILREDNCHFRLVDKQDFNR-----IIKD--
-----V-----
-----
-----EAKTMRLEEHGKVVLVLER-----A-----SQG
AG----PSRP-----PTPGRN-----R-YTVMSTGTPPEKI
LELLLEA-----MGPDSSAHDPT-ETF-----LS---D-
FLLTHRV--FM-----PSAQLCAALL----HHF-----H-
-----AEPA--GGSEQERSTYICNKRQQILRLVSQ
WVALYGSMLHTD-PVATSFLQ---KLSDL--VGRDA--RLSNLLR--EQ-WPERRR-H
HRL---ENGCGNA--SP---QMKAR-----NLP-----
----VW-----LPNQD-----EP-----
-----L-----
---PGSS-----
-----
-----
-----
-----CAIRVGDK--VP-----YD-----
ICLPDHSVLTQLPVTASVREVM-----ALAQEDG-----WT-----KGQ--VL
VKVNSS-----G-----DAIGLQPDARGVATSLGLNERLFVV
NPQE--V-HELT-PHPDQL-----GP-----TVGSA
EG--LDLVSAKDLAQQLTDHDSWLSFNISIQVELIY-----YALGPQHL-RDVTTANLE
RFMR-----FNELQYWV-----ATELCLCPVPGPR-----AQLLRKFIKLAHL
-----KEQKNLNSFFAVMF-GLSNSAISRLAHTWE-----
-----RLPHKVRKLYSA-LERLL-----DPSWNH--
-RVYRL---ALAK-----LSPPVI-PFMP-----
LLLKDMTFIHEGNH--TL-VE-----N-LINFE-KM
-----RM--MARAAARMLHHCRRSHNP-----VPLSPLRS
RVSHLHEDSQVARISTCSEQSLSTR-----S-----PASTWA-----YV
QQLKVIDNQREL-----SRLSREL
-----EP-----

```

-----  
---  
>Rapgef3\_[Parus\_major]\_998744296  
-----  
-----  
-----MGACSEGTS-----  
GWDG-NEDGERRRRSHDAPVPPLSF--HLLR--VFHLLTQNLPSGPSAL-PSPGSSC---  
GVWVLDSGSAEF--PPPRV-----KSWGCG-----PPTPE-GGTA  
EPPQP-PTPSPLVFQ-----T-----  
-----PLLD-----SESSLDCGH-----SITQAS---P-----  
-----EKIW-----RAGKLLF-----A---H---LSTSR  
PG-L-----IRDHKHH-----L-RHH-----RQC-CS  
GK-----ELVDWLLSSG-----A  
----AVQ-----TRQAVGIG---QVLLXVS-----  
-----  
-----  
-----RIQGI-----  
-----LWGSCECG--E-----  
----RVPDPGN----PL-----GEWGHEG-DDF  
GQLAL-----VNDAPRA---ATILLREDNCHFLRVDKQDFNR-----ILKD--  
-----V-----  
-----  
-----EANTVRLKEHGKVVLVLQKDL-----QG  
G-----GGQA-----ASARSS-----  
-----  
-----R-----VKRELAAVLMFEG---HQ-----R-----  
-----AGTVL---FSQGDKGT-----S  
WYIIW-----K---GSVN--VVTHG---KLGGLGQ---EQ-GQERRR--  
PRA---MENGDGSV--SP-----QPKPRS-----SGM-----  
-----W-----LGTPE-----EA-----  
-----IL-----  
----DSTS-AL-----RAQDK-----  
-----  
-----  
-----VP-----YE-----  
IFRADHSCLVSVLPVNASVRDVLR-----ALAPRLG-----RDRE-HVL  
VKVNSA-----GERAV-----LPQDAVGVF TALGLNERLFVV  
TADE---L-GNLT-PHPEQL-----GP-----HAGSS  
DS--LDLISSKDLASHLTDYDWNLFKSIHQVEMIH-----YIVGPQKF-HEVT TANLA  
RVMRR-----FNELQFWV-----ATELCLCPELGRR-----AQLLRKF IKLAAQC  
-----P-----  
-----PH-----AQ-----DPSWNH---  
-RVYRL---AVAK-----MSPPII-PFMPL-LLK-----  
----DMTFIHEG NR--TLA-----EN-LINFE-KM  
-----HM--MAKTVRVLQRCRG--HA-----HAPLSPLRN  
RSPHRPEDPKAVRIST-----  
-----C-----SEQSLSV  
RNPVSTWAY-LQHLRAIDSQRELLRLSRDLEP-----

-----MQVAWGAQGRW-----  
-HVG-LGPQD-----SPAQLHRL-----  
GDPTAEGHRLYL--LVKKM-----HLFRSYSYQI-----RLEGE-AGSL  
PSIQG-----IRW-----K-----  
-----PLPD-----SESAPDFGQ-----SLTQAP--A-----  
-----EKIW-----RAGKLLY-----S--H--LMSTR  
PG-L-----IRDHKHH-----L-RHH-----RQC-LS  
GK-----ELVDWLLSAG-----L-----  
----SAQ-----TRGQAIGVC--QVLVDGGV-----  
-----KDKDAQFYRFAEG  
E-----LSPEP--GTWGT-----  
-----EEL-----LEALAFLAQLGPDAL-----LTMALRKP-----  
ED-----AEGG-E-LPRQAGLA-SLLLFESHPKAGTV-----  
-----LFSQGDKG--TSWYIIW  
KGSVNVVTHGK----GL-----VTTLHEG-DDF  
GQL-----DAPRA--ATIILREDNCHFLRVDPQHXXH-----VLXD--  
-----V-----  
-----EANTMRLKEHGKVVVLVLEKNL-----QG  
WG----SGSPA-----PSAGGR-KP-----GRAG-YSVMAGTPDKI  
LEYLLEA-----MRLDATFSDDL-D-----TLIG--D-  
FLITYKV--FM-----PTAQLCRALL-----HHF-----H-----  
-----AEPSE--GSAQEKAVYSLSKRQKIL-AXSQ  
WVLLYGHLLQAE-PSAMTLLQ---NLSD--FASRDP--GLCSSLQ---DQ-TQDRRR-  
HRA--LENGGSA--SP---QPKVRS-----TVN-----  
----W-----FSTLE-----DA-----  
-----AL-----  
----SNSY-TI-----GAQDKGSSSAS--VCHRKPAAAAGA  
-----QTDRHLLPPHH--RDSFHCLPAHTTDSL--LRQPEVQ-----  
-----TDRHL-----LPP-----  
-----PQVP-----YE-----  
VHRADPPCLTVVLPVNASVRDVLQ-----ALACQEG-----EHGE-RVL  
VKVNSA-----GDWPG-----LPMDTVGVYTSGLNLERLFVV  
DVQE--L-PTLT-PHHEQL-----GP-----TAGSS  
EV--LDLISSKDLASQLTDYDWNLFISVHQVELIY-----YIFGQQT-PSVTTANLE

RLMRR-----FNELQYWI-----ATELCLCAEPARR-----TQLLRKFIKLA AHL  
-----KEQKNLNSFFAVMF-GLSNTAVSRLAKTWE-----  
-----RLPHKTRKLHSA-LERML-----DPSWNH-----  
-RVYRL---AVAK-----LSPPII-PFIPL-LLK-----  
---DLTFIHEG NR---TLT-----EN-LINFE-KM  
-----RM---MAKAVRIIHH CQS---HT-----HAPISPLRS  
RAPHVLEDPQALRIST-----  
-----C-----SELSLSG  
RSPVSTWAY-LQHLKVIDNQKELSRLSRDLES-----





TG-----PSRP-----PTPGRN-----R-YIVMSGTPEKI  
LELLLLLEA-----MRPDSSAHDPTETF-----LS---D-  
FLLTHSV--FM-----PTAQLCAALL----HHF-----H-----  
-----AEPA---GGSEQECSTYICNKROQILRLVSQ  
WVALYGPM LHTD-PVATSFLQ---KLSDL-VSRDA-RLSNLLR--EQ-WPERRR-H  
HRL---ENGCGNA--SP-----QMKA W-----NMP-----  
-----VW-----LPSQD-----EP-----  
-----L-----  
---PSSN-----  
  
-----  
  
-----CAIRVGDK--VP-----YD-----  
ICRPDH SVLT LQLPVTASVRE VMA-----ALAQEDG----WT-----KGQ--VL  
VKVNSA-----G-----DTVGLQP DARG VATS LG LN ER LFVV  
NPQE--V-HELT-PHP EQL-----GP-----TVGSA  
EG--LDLVSTKDLAGQLTDHDWSLF NSIH QVELI H-----YVLGPQPL-RDVTTANLE  
RFMRR-----FNELQYWV-----ATELC LCP VP GL R-----AQLLRKF I KLA AHL  
-----KEQKNLNSFFAIM F-GLSNSAISRLAQTWE-----  
-----RLPHKV RKLY SA-LER QL-----DPSWNH---  
-RVYRL---ALT K-----LSP PLI -PF MP-----  
LLLKDM TFI HE GNH--TL-VE-----N-LINFE-KM  
-----RM---MARAA RI LHHC RS HS N-----VPL SPLRS  
RVSHLHEDSQVARISTCSEQSLSTR-----S-----PASTWA-----YV  
QQLKVID SQREL-----SRL SREL  
-----EP-----  
  
-----  
  
---

>Rapgef3\_[Poecilia\_formosa]\_617405394

-----  
  
-----MHLFRTHNYQ-V  
F---PH-----RYSVE-K--PTIR-----  
-----GIS-----WT-----  
-----PLPEALDS---KD-SMKQ-----FLS-----  
-----DRVV-----KA-----ARSVY-SVMVEKN  
PG-L-----IRDRKHH-----L-KTH-----RQC-CS  
GK-----ELVDWL MKQS-----E  
-----CLQ-----SRSQAAGMW--QVLVDEGI LV-----  
-----H-----VKQ-DLNFLDKDTQFY RFQ DS  
-----EFGLNH VSNEK-----  
EL-----

[illegible]

-----GIS-----WT-----  
-----PLPEALDP--KD-TMKQ-----FLS-----  
-----DRVV-----KA-----ARSVY-SVMVEKN  
PG-L-----IRDRKHH-----L-KTH-----RQC-CS  
GK-----ELVDWLMKQS-----E  
----CLQ-----SRSQAAGMW---QVLVDEGILV-----  
-----H-----VKQ-DLNFLDKDTQFYRFQDS  
-----EFGLNHVSNEK-----  
EL-----  
-----EDEL-----HEALSLLSQLGPDAL-----LTMILRKCPQSORS  
AEDIE-----VIYEELLHVKAAAHLS-SSVRKELA-AVLVFESHVKSGTVL-----  
-----FSQGDKG--TSWYIIW  
KGSVNVITHGK----GI-----VTTLHEG-EDF  
GQLAL-----LNDAPRA---ATIILREDNCHFLRVDKHDFIR-----ILKD--  
-----V-----  
-----  
-----EANTVRLEEKGKTVLVLEK-----S-----  
AD---CNGQG-----GAAANS-----K-YTVMSGTPEKI  
LEHLLDT-----LKLDSENGNDPI-DP-----CVS---D-  
FLLTHKV--FM-----PSSQLCSALQ----HHY-----Q-----  
-----AELSK---GSDQEKTAIYFNTKQKVVKLIAQ  
WVALYGLLLKED-PEVGDFLE---RLKKE--VAADY--RLSSILK---EQ-FRERRR--  
TKV---MENGYQSL--S-----R-N-QQFD-----  
-----W-----FSSCE-----EP-----  
-----  
--VGRL-----  
-----  
-----  
-----  
----QPIKAQDK--VL-----YE-----  
IYKADSKPLSLMLPVSSSVQEVMS-----AIVKAD-----GDH--VL  
VKMNSS-----G-----ERAQLKLDATAVYTALGLNERLFIC  
TSSE---V-EQLR-PLKDQQ-----GP-----EQATT  
DL--IEQMSSKDIATELTNYDWELFTAMHEVELIY-----YIFGRHKF-PGATTANLE  
RFVRH-----FNVVQHWV-----VTELCLCEDLVKR-----AILLKKFIKIASVL  
-----KEQRNLNSFFAVMF-GLSNSAVQRLYKTWE-----  
-----RIPSKTKRIYCA-YERLM-----DPSRNH--  
-RAYRL---AVAK-----LSPPYI-PFMP-----  
LLLKDMTFIHEGNP--NY-VD-----K-LVNFE-KM  
-----RM---LAKTVKIVRGCRSQPY-----VPSSPQRG  
LADRMFLDGPATRLSTYSDHAFPLR-----S-----PSNIRQ-----YI  
QNLKVIDNQRL-----TQLSRTI  
-----EC-----  
-----  
-----  
-----  
-----  
-----  
-----  
-----  
-----

-----  
---  
>Rapgef3\_[Poecilia\_reticulata]\_658859927  
-----  
-----  
-----  
-----  
-----MHLFRTHNYQ-V  
F----PH-----RYSVE-K--PTIR-----  
-----GIS-----WT-----  
-----PLPEALDP---KD-TMKQ-----FLS-----  
-----DRVV-----KA-----ARSVY-SVMVEKN  
PG-L-----IRDRKHH-----L-KTH-----RQC-CS  
GK-----ELVDWLMKQS-----E  
-----CLQ-----SRSQAAGMW---QVLVDEGILV-----  
-----H-----VKQ-DLNFLDKDTQFYRFQDS  
-----EFGLSHXSNEK-----  
DL-----  
-----EDEL-----HEALSLLSQLGPDAL-----LTMILRKCPQSRS  
AEDIE-----VIYEELLHVKAAAHLS-SSVRKELA-AVLVFESHVKSGTVL-----FSQGDKG--TSWYIIW  
KGSVNVITHGK-----GI-----VTTLHEG-EDF  
GQLAL-----LNDAPRA---ATIILREDNCHFLRVDKQDFIR-----ILKD--  
-----V-----  
-----  
-----EANTVRLEEKGKTVLVLEK-----S-----  
AD----CNGQG-----GAAANS-----K-YTVMSGTPEKI  
LEHLLDT-----LKLDSENGNDPI-DP-----CVS---D-  
FLLTHKV--FM-----PSSQLCSALQ----HHY-----Q-----  
-----AELSK---GSDQEKTAIFYNTKQKVVKLIAQ  
WVALYGLLLKED-PEVGDFLEQ---RLKKE--VAADY--RLSSILK---EQ-FRERRR--  
TKV---MENGYQSL--S-----R-N-QQFD-----  
-----W-----FPSCE-----EP-----  
-----  
---VGRL-----  
-----  
-----  
-----  
-----QPIKAQDK--VL-----YE-----  
IYKADSKPLSLMLPVSSSVQEVMS-----AIVKAD-----GDH--VL  
VKMNSS-----G-----DRAQLKLDATAVYTALGLNERLFIC  
TSSD---V-EQLR-PLKDQQ-----GP-----EQATT  
DL--IEQMSSKDIATELTNYDWELFTAMHEVELVY-----YIFGRHKF-PGATTANLE  
RFVRH-----FNVVQYWV-----VTELCLCEDLVKR-----AILLKKFIKIASVL  
-----KEQRNLNSFFAVMF-GLSNSAVQRLYKTWE-----  
-----RIPSKTKRIYCA-YERLM-----DPSRNH---  
-RAYRL---AVAK-----LSPPYI-PFMP-----  
LLLKDMTFIHEGNP--NY-VD-----K-LVNFE-KM  
-----RM---LAKTVKIVRGCRSQPY-----VPSSPQRG  
LADRMFLDGPATRLSTYS DHAFPLR-----S-----PSNIRH-----YI  
QTLKVIDNQRL-----TQLSRTI  
-----EC-----

-----MAQKEEITQPLWETVGWPGE-----  
---CWQVGLAVED-SPALGAPRVGA---LPDVVPEGTLLNMVLRRMHRPRSCSYQ-L  
LLE-----HQRPS-----CIQ-----  
-----GLR-----WT-----  
---PLTNSEESLDFSE-SLEQA-----S-----T-----  
---ERVL-----RA-----GRQLH-RHLLATC  
PN-L-----IRDRKYH-----L-RLY-----RQC-CS  
GR-----ELVDGILALG-----L-----  
---GVH-----SRSQVVGIC--QVLLDEGALC-----  
-----H-----VKH-DWAFQDRDAQFYRFPGP  
---EPEP--VGAHEM-----  
-----EEEL-----AEAVALLSQRGPDAL-----LTVALRKPPGQRT  
DEELD----LIFEELLHIKAVAHLNSVKRELA-AVLLFEPHSKAGTV-----

[illegible]







DEELA-----LIFEELLHVKAHAHLS-SSVRRELA-AVLLFESHAKAGTVL-----PNQRT  
-----FSQGDKG--TSWYIIW  
KGSINVVTHDK----GL-----VCTLHEG-DDF  
GQLAL-----VNDAPRA--ATIILREDSCHFRLVDKRDFNR-----ILKD--  
-----V-  
  
-----EANTLRLKEHGKVVLVLEK-----N--  
SQ-GTNSSH LA-----GTPGSS-----R-Y SVMAGTPEK  
LDYLLET-----MRSDSTLSDPV-DTF-----LG---D-  
FLLTYSV--FM-----PTPQLCRTLL-----QHF-----H-  
-----SEPSE--GSEQDKAAYILGKRQKILWLNVNQ  
WVS LYGRLLQAE-ACAVAF LQ---TMSEY--ATQDA--RLGPLVR--EQ-IQDRRR--  
NRV---IENG SNCA--SPK---LQVR-NVVN-----  
-----R-----FVIQE-----ET-----  
-----F-----  
---LNNS-----  
  
-----YTMRIKDK--VS-----YD-----  
IYRPNY SCLTRLLQVNASVQEVLA-----SLVDCQDWN-----KDW--IL  
VKVNSA-----G-----DKVVLPMEAFGVFTSLGLNERLFAV  
SVQE--L-HNLA-PHQEQL-----GP-----RIGSW  
ES--LDFISSKDLANQITEHDWNLFKSLHQVELIY-----YVVG SQKF-PSATT VNVE  
RFLRR-----FNELQFWI-----TTTELCLCPDV IKR-----AQ LLRKFIKLA AHL  
-----KDQRNLNSFFAVMF-GLSHSAISRLSRTWE-----  
-----KL PYKTRKLYGT-MERML-----DPSWNH--  
-RVYRL---AVAK-----LSPPMI-PFMP-----  
LLLKDMTFIHEGNR--TL-VE-----N-LVNFE-KL  
-----RM--MAKAVHLVHHCR SHPN-----LPLSPLRS  
RPQHLL EEARAMRTSTCSVQSLSTR-----S-----PAATWA-----HI  
QPLRVIDRQKEL-----LR LS RDL  
-----ES-----  
  
\_\_\_\_\_  
>Rapgef3\_[Pseudopodoces\_humilis]\_929508805  
  
-----M-----HLFRSSSYEV-----RIEGA-GGS

PRIQG-----IRW-----T-----  
 -----PLLD-----SESSLDYGH-----SITQAS--P-----  
 -----EKIW-----RAGKLLF-----A--H--LSTSR  
 PG-L-----IRDHKHH-----L-RHH-----RQC-CS  
 GK-----ELVDWLLSSG-----A-----  
 ---AVQ-----TRGQAVGIG--QVLLDGGVLT-----  
 -----H-----VRQ-EWHFQDKETQFYRFAEL  
 E-----LSPEP-GAGPRDP-----  
 -----  
 -----EEL-----LEALGFLAQLGPDAL-----LSMALRKPPAQRT  
 QDELE----LIFEELLHIKAVAHLS-NSVKRELA-AVLMFEGHQAGTV-----  
 -----LFSQDGKG--TSWYIIW  
 KGSVNVVTHGK----GL-----VATLHEG-DDF  
 GQLAL-----VNDAPRA--ATILLREDNCHFLRVDKQDFNR-----ILKD-  
 -----V-----  
 -----  
 -----EANTVRLKEHGKVVVLVLQKDL-----QG  
 G-----GGQA-----ASARSSSR-----YLVMMAGTPEKI  
 LEHLLEF-----MRLDATLYDPV-D-----TLLG---D-  
 FLLTYTV--FM-----PTSQLCRALL----HHF-----R-----  
 -----AEPL--GSEQDKATYSLRKRRIKILRLVSQ  
 WVLLYGRLLQGD-RSTTALLQ---NLAD--LASRDP--QLGGLGQ--EQ-GQERRR-  
 PRA--MENGDGSV--SP-----QPKPRS-----SGM-----  
 ---W-----LGTPE-----EA-----  
 -----IL-----  
 ---DSTS-AL-----RAQDK-----  
 -----  
 -----  
 -----VP-----YE-----  
 IFRADHSCLVSVLPVNASVRDVLR-----ALAPRLG-----RDRE-HVL  
 VKVNSA-----GERAV-----LPQDAVGVTALGLNERLFFV  
 TADE---L-GNLT-PHPEQL-----GP-----HAGSS  
 DS--LDLISSKDLASHLTDYDWNLFKSIHQVEMIH-----YIVGPQKF-HEVTANLA  
 RVMRR-----FNELQFVW-----ATELCLCPELGR-----AQLLRKFIKLAHL  
 -----KEQKNLNSFFAVMF-GVSNTAVTRLAKTWE-----  
 -----RLPHKIRKLHSA-LERML-----DPSWNH---  
 -RVYRL---AVAK-----MSPPII-PFMPL-LLK-----  
 ---DMTFIHEGNR--TLA-----EN-LINFE-KM  
 ---HM--MAKTVRVLQRCRG--HA-----HAPLSPLRN  
 RSPHRPEDAKAVRIST-----  
 ---C-----SEQSLSV  
 RNPISTWAY-LQHLRAIDSQRELLRLSRDLEP-----

-----  
---  
>Rapgef3\_[Pteropus\_alecto]\_989976416  
-----  
-----  
-----  
-----  
-----MVLRRMHRPRSCSYQ-L  
LLE-----HQRP-S-----RIQ-----  
-----GLR-----WT-----  
-----PLTNSEESLDFSV-SLEQA-----S-----T-----  
-----ERVL-----RA-----GKQLH-RHLLATC  
PN-L-----IRDRKYH-----L-RLY-----RQC-CS  
GR-----ELVDGILALG-----L  
-----GVH-----SRSQAVGIC---QVLLDESALC-----  
-----H-----VKH-DWTFQDRDTQFYRFPGP  
-----EPEP--VGVHEL-----  
-----  
-----EEEL-----VEAMALLSQRGPDAL-----LTVALRKSPGQRT  
DEELD-----LIFEELLHIKAVAHLS-NSVKRELA-AVLLFEPHSGAGTVL-----  
-----FSQGDKG--TSWYIVW  
KGSVNVVTHGK-----GL-----VTTLHEG-DDF  
GQLAL-----VNDAPRA---ATIVLREDNCHFLRVDKQDFNR-----I IKD--  
-----V-----  
-----  
-----EAKTMRLEEHGKVVLVLER-----T-----SQG  
AG-----SSCP-----PTPGRN-----R-YTVMSGTPEKI  
LELLLEA-----MRPDSSAHDPT-ETF-----LS---D-  
FLLTHSV--FM-----PSTQLCAALL---HHF-----H-----  
-----VEPA---GGSEQERSTYICNKRQQIILRLVSQ  
WVALYGPM LHTD-PVASSFLQ---KLSDL--VSRDA--RLSNLLR---EQ-WPERRR-H  
HRL---ENGCGNT--SP-----QMKAR-----NMP-----  
-----AW-----LPSQD-----EP-----  
-----L-----  
---PSSN-----  
-----  
-----  
-----  
-----CAIRVGDK--VS-----YD-----  
ICRPDHSVLTQLPVMASVREVMA-----ALAKEDS-----WT-----KGQ--VL  
VKVNSA-----G-----DAIGLQPDARGVATSLGLNERLFVV  
NPQE---V-HELT-PHPEQL-----GP-----TVGSA  
EG--LDLVSAKDLAQLTDHDWNLFNSIHQVELIH-----YVLGPQHL-RDVTTANLE  
RFMR-----FNELQYWV-----ATELCLCAVPGPR-----AQLLRKFIKLAAHL  
-----KEQKNLNSFFAVMF-GLSNSAISRLARTWE-----  
-----RLPHKVRKLYSA-LERLL-----DPSWNH---  
-RVYRL---ALTK-----LSPPI-PFMP-----  
LLLKDMTFIHEGNH--TL-VE-----N-LINFE-KM  
-----RM--MARAVRMLHHCRRSHN-----VPLSPLRS  
RVSHLHEDSQAVRISTCSEQSLSTR-----S-----PASTWA-----YV  
QQLKVIDNQREL-----SRLSREL  
-----EP-----

```
-----  
-----  
-----  
-----  
-----  
-----  
-----  
-----  
  
---  
>Rapgef3_[Pteropus_vampyrus]_759143390  
-----  
-----M-----  
-----  
-----K-----VGWPGES-----  
----RWQVGLTVED-SPALGAPQVGG----LPDVVPEGTLLNMVLRRMHRPRSCSYQ-L  
LLE-----HQRPS-----RIQ-----  
-----GLR-----WT-----  
----PLTNSEESLDFFSV-SLEQA-----S-----T-----  
----ERVL-----RA-----GKQLH-RHLLATC  
PN-L-----IRDRKYH-----L-RLY-----RQC-CS  
GR-----ELVDGILALG-----L  
----GVH-----SRSAVGIC--QVLLDESALC-----  
-----H-----VKH-DWTFQDRDTQFYRFPGP  
-----EPEP-VGVHEL-----  
-----  
-----EEEL-----VEAMALLSQRGPDAL-----LTVALRKSPGQRT  
DEELD----LIFEELLHIKAHAHLNSVKRELA-AVLLFEPHSKAGTVL-----  
-----FSQGDKG--TSWIIVW  
KGSVNVTTHGK----GL-----VTTLHEG-DDF  
GQLAL-----VNDAPRA--ATIVLREDNCHFLRVDPDFNR-----IIKD--  
-----V-----  
-----  
-----EAKTMREEHGKVVLVLER-----T-----SQG  
AG----PSCP-----PTPGRN-----RYTVMSGTPSKI  
LELLLLA-----MRPDSSAHDPTEFT-----LS--D-  
FLTHSV-FM-----PSTQLCAALL-----HHF-----H-----  
-----VEPA--GGSEQERSTYICNKRRQQILRLVSQ  
WVALYGPMHTD-PVASSFLQ--KLSDL--VSRDA--RLSNLLR--EQ-WPERRR-H  
HRL--ENGCGNT--SP--QMKA--NMP-----  
----AW-----LPSQD-----EP-----  
-----L-----  
----PSSN-----  
-----  
-----CAIRVGDK--VS-----YD-----  
ICRPDHSLTLTLQLPVTAASREVMA-----ALAKEDS-----WGQ--VL  
VKVNSA-----G-----DAIGLPDARGVATSLGLNERLFVV  
NPQE--V-HELT-PHQEL-----GP-----TVGSA  
EG--LDLVSAKDLAQGLTDHDWNLFNSIHQVELIH-----YVLGPQHL-RDVTANLE
```

RFMR-----FNELQYVW----ATELCLCAVPGPR-----AQLLRKFIKLAHL  
-----KEQKNLNSFFAVMF-GLSNSAISRLARTWE-----  
-----RLPHKVRKLYSA-LERLL-----DPSWNH---  
-RVYRL---ALTK-----LSPPVI-PFMP-----  
LLLKDMTFIHEGNH--TL-VE-----N-LINFE-KM  
-----RM--MARAVRMLHHCRRSHN-----VPLSPLRS  
RVSHLHEDSQAVRISTCSEQSLSTR-----S-----PASTWA-----YV  
QQLKVIDNQREL-----SRLSREL  
-----EP-----



```

-----SAG-----TTVSPE-----G-YLVMAGTPEKI
LEHLLLEF-----MRLDATLYDPV-GCN-----L-----
-----ASPFR-----GVQEQKVARN-----
-----EHGHRGG-----RP-----Q-----
-----AS-----ATQGT-----
-----
-----VP-----YE-----
IYRPDHSCLIAVLPVNASVRDILR-----SLAPRLG-----RDGE-HVL
VKVNSA-----GDKVG-----LQLDAVGVTALGLNERLFAV
SVEE---L-GSL-----HIGSS
ET--LDLISSKDLASHLTDYDWNLFKSIHQVEMIH-----YIVGPQKF-HDVTANLE
RVMRR-----FNELQYWV-----ATELCCLCPEVGRR-----AQLLRKFIKLA AHL
-----KEQKNLNSFFAVMF-GVSNTAVSRLAKTWE-----
-----RLPHKIRKLHSA-LER-----
-----
-----HM--MAKTVRVLQRCRG--DA-----HAPLSPLRN
RSPHRPEDPKGVRIST-----C-----SEQSLSV
RSPVSTWAY-LQHLKAIDSQKELLRLSHDLES-----
-----
---
>Rapgef3_[Python_bivittatus]_602664072
-----
-----MFSE-----
-----T-----
-----PLPESESALVPGH-NLKQA-----S--S-----
-----NKIR-----RA-----GRLLC-THLVVMY
PD-L-----IRDHKHH-----L-RLH-----RQC-CS
GK-----ELVDALLSAG-----L
---SVQ-----TRSQALGLC---QVLMDEGVLS-----
-----H-----VRQ-ESYFQDRDAQFFRFVAL
-----EP-----SAE-----
-----DKDG-----

```

```

-----EEL-----LEALALLTQLGPTAL-----LTTILRKPPNQRT
DEELA-----LIFEELLHVKAHAHLS-SSVKRELA-AVLLFESHAKAGTVL-----
-----FSQGDKG--TSWYIIW
KGSVNVVTHDK-----GL-----VSTLHEG-DDF
GQLAL-----VNDAPRA---ATIILREDSCHFRLVRDKRDFNR-----ILKD--
-----V-----
-----
-----EANTLRLKEHGKVVLVLEK-----N--
SQ-GSNSGHLP-----GTPGSS-----R-YSVMAGTPEK
LDYLLET-----MRSDSTLSDPV-DTF-----LG---D-
FLITYSV--FM-----PTPQLCTTLL----QHF-----H-
-----SESSK--GSEQDKAAYILGKRQKILWLWNQ
WVSlyGRLLQAE-ACAVAFLO---TLSEC--TTQDA--RLGPLLR--EQ-IQDRRR--
NRV---IENGSNCA--SPK---LQAR-NVVN-----
-----W-----FASQE-----EP-----
-----F-----
---LNSS-----
-----
-----
-----YTIRIKDK--VS-----YD-----
IYRPDYSLCTTLLQVNASVQEVLA-----SLVDCQDWN-----KDW--IL
VKVNSA-----G-----DKVVLPMEAFGVFTSLGLNERLFSA
SVQE--L-HNVA-PHPEQL-----GP-----SMGSW
ES--LDFMSSKDLANQFTEHDWNLFKSIHQVELIY-----YVVGPKKF-PSATTANVE
RFLRR-----FNELQFWV----TTELCLCPDVlKR-----AQLLRKFIKLAHL
-----KDQKNLNSFFFAVMF-GLSHSAISRLSRTWE-----
-----KLPHKTRKLYGT-MERML-----DPSWNH--
-RVYRL---AVVK-----LSPPMI-PFMP-----
LLLKDMTFIHENR--TL-VE-----N-LVNFE-KL
-----RM--MAKAVRLVHHCRSHPN-----LPLSPLRS
RPQHLMEEARAMRTSTCSEQSLSTR-----S-----PAATWA-----YI
QHLRVIDRQKEL-----LRLSRDL
-----ES-----
-----
-----
>Rapgef3_[Rhinopithecus_roxellana]_724952750
-----M-----
-----K-----VGWPGEs-----
-----CWQVGLAVED-SPALGAPQVGA---LPDVVPEGTLNMLVRKMHRPRSCSYQ-L
LLE-----HORP-S-----CIO-----

```



```

-----GLR-----WT-----
-----PLTNSEESLDFSE-TLEQA-----S-----T-----
-----ERVL-----RA-----GRQLH-RQLLATC
PN-L-----IRDRKYH-----L-RLY-----RQC-CS
GR-----ELVDGILALG-----L
----GVH-----SRSQVVGIC---QVLLDEGALC-----
-----H-----VKH-DWAFQDRDAQFYRFPGP
-----EPEP--VGAHEM-----
-----
-----EEEL-----AEAVALLSQRGPDAL-----LTVALRKPPGQRT
DEELD----LIFEELLHIKAVAHLS-NSVKRELA-AVLLFEPHSKAGTVL-----
-----FSQGDKG--TSWYIIW
KGSVNVVTHGK----GL-----VTTLHEG-DDF
GQLAL-----VNDAPRA--ATIILREDNCHFRLVDKQDFNR-----IIKD--
-----V-----
-----
-----EAKTMRLEEHGKVVLVLER-----A-----SQG
AG----PSRP-----PTPGRN-----R-YTVMSTGTPPEKI
LELLLEA-----MGPDSSAHDPT-ETF-----LS---D-
FLLTHRV--FM-----PSAQLCAALL----HHF-----H-
-----AEPA--GGSEQERSTYICNKRQQILRLVSQ
WVALYGSMLHTD-PVATSFLQ---KLSDL--VGRDA--RLSNLLR--EQ-WPERRR-H
HRL---ENGCGNA--SP---QMKAR-----NLP-----
----VW-----LPNQD-----EP-----
-----L-----
---PGSS-----
-----
-----
-----
-----CAIRVGDK--VS-----YD-----
ICLPDHSVLTQLPVTASVREVM-----ALAQEDG-----WT-----KGQ--VL
VKVNSA-----G-----DAIGLQPDARGVATSLGLNERLFVV
NPQE--V-HELT-PHPDQL-----GP-----TVGSA
EG--LDLVSAKDLAQQLTDHDSWLFNSIHQVELIY-----YVLGPQHL-RDVTTANLE
RFMR-----FNELQYWV-----ATELCLCPVPGPR-----AQLLRKFIKLAHL
-----KEQKNLNSFFAVMF-GLSNSAISRLAHTWE-----
-----RLPHKVRKLYSA-LERLL-----DPSWNH--
-RVYRL---ALAK-----LSPPVI-PFMP-----
LLLKDMTFIHEGNH--TL-VE-----N-LINFE-KM
-----RM--MARAAARMLHHCRRSHNP-----VPLSPLRS
RVSHLHEDSQVARISTCSEQSLSTR-----T-----PASTWA-----YV
QQLKVIDNQREL-----SRLSREL
-----EP-----

```

-----  
---  
>Rapgef3\_[Rousettus\_aegyptiacus]\_1012262851  
-----

-----M-----  
-----K-----VGWPGES-----  
-----RWQVGLTVED-SPALGAPLVGS-----LTDVVAEGTLLNMVLRMRHRPRSCSYQ-L  
LLE-----HQRP-S-----RIQ-----  
-----GLR-----WT-----  
-----PLTNSEESLDFSV-SLEQA-----S-----T-----  
-----ERVL-----RA-----GKQLH-RHLLATC  
PN-L-----IRDRKYH-----L-RLY-----RQC-CS  
GR-----ELVDGILALG-----L  
-----GVH-----SRSQAVGIC---QVLLDEGALC-----  
-----H-----VKH-DWTFQDRDTQFYRFPGP  
-----EPEP--AGVHEL-----  
-----EEEL-----VEAMALLSQRGPDAL-----LTVALRKSPGQRT  
DEELD-----LIFEELLHIKAVAHLS-NSVKRELA-AVLLFEPHSGAGTVL-----  
-----FSQGDKG--TSWYIIW  
KGSVNVVTHGK-----GL-----VTTLHEG-DDF  
GQLAL-----VNDAPRA---ATIVLREDNCHFLRVDKQDFNR-----IIKD--  
-----V-----  
-----EAKTMRLEEHGKVVLVLER-----T-----SQG  
AG-----PSHP-----PTPGRN-----R-YTVMSGTPEKI  
LELLLEA-----MRPDSSAHDPT-ETF-----LS---D-  
FLLTHSV--FM-----PSTQLCAALL---HHF-----H-----  
-----VEPA---GGSEQERSTYICNKRQQILRLVSQ  
WVALYGPM LHTD-PVASSFLQ---KLSEL--VSRDA--RLSNLLR---EQ-WPERRR-H  
HRL---ENGCGNA--SP---QIKAR-----NMT-----  
-----AW-----LPSQD-----EP-----  
-----L-----  
---PSSN-----  
-----CAIRVGDK--VS-----YD-----  
ICRPDHSVLTQLPVTASVREVMA-----ALAKEDS-----WT-----KGQ--VL  
VKVNSA-----G-----DAIGLQPEARGVATSLGLNERLFVV  
NPQE---V-HELT-PHPEQL-----GP-----TVGSA  
EG--LDLVSAKDLAQQLTDHDWNLFNSIHQVELIH-----YVLGPQHL-RDVT TANLE  
RFMR-----FNELQYWV-----ATELCLCAVPGPR-----AQLLRKFIKLAAHL  
-----KEQKNLNSFFAVMF-GLSNSAISRLARTWE-----  
-----RLPHKVRKLYSA-LERLL-----DPSWNH---  
-RVYRL---ALTK-----LSPPII-PFMP-----  
LLLKDMTFIHEGNH--TL-VE-----N-LINFE-KM  
-----RM--MARAVRMLHHCRRSHN-----VPLSPLRS  
RVSHLHEDSQAVRISTCSEQSLSTR-----S-----PASTWA-----YV  
QQLKVIDNQREL-----SRLSREL  
-----EP-----



```
RFMR-----FNELQYVW----ATELCLCAVPGPR-----AQLLRKFIKLA AHL
-----KEQKNLNSFFAVMF-GLSNSAISRLAHTWE-----
-----RLPHKVRKLYSA-LERLL-----DPSWNH---
-RVYRL---ALAK-----LSPPVI-PFMP-----
LLLKDMTFIHEGNH--TL-VE-----N-LINFE-KM
-----RM--MARAARMLHHC RSHNP-----VPLSPLRS
RVSHLHEDSQVARISTCSEQSLSTR-----S-----PASTWA----YV
QQLKVIDNQREL-----SRLSREL
-----EP-----
```

F-----PD-----HYSVE-T--STIR-----MHLFRSYNYR-I  
 -----GIS-----WT-----  
 -----PLPEALDT--QD-TMKQ-----FLS-----  
 -----DRIL-----KA-----ARVVH-SALIVRS  
 PG-L-----IRDRKHH-----L-KTY-----RQC-CS  
 GK-----ELVDWLMKLN-----E  
 ----CFQ-----SRSQAVGMW--QVLVDEGIIV-----  
 -----H-----VKQ-ELNFHDKDTQFYRFLDL  
 -----EFGLNHMTNEK-----  
 IS-----LNHTTNEKDQL-----  
 -----DDEL-----QEGLSLLLQIGPDAL-----LTMI LRKCPSQRS  
 AEDLE----VIYEELLHVKAAAHLS-TSVRKELA-AVLMFESHAKAGTVL-----  
 -----FSQGDKG--TSWYIIW  
 KGSVNVITHGK----GL-----VTTLHEG-EDF  
 GQLAL-----VNDAPRA--ATIILREDNCHFLRVDKQDFIR-----ILKD--  
 -----V-----

```

-----EANTMRLEEKGKAVLVLEK-----A-----
ES-----TNPG-----GAGNSS-----K-YTVMAGTPEKI
LEHLLET-----VKLDTNGSDAI-DP-----CVS---D-
FLLTHRV--FM-----PSSQLCPALQ-----HHY-----H-----
-----AEPSE---GSDLEKAAYALNTKQKIVKLICQ
WVAVFGQLLKDD-PIAVDFLE---RLGEE--VAGDS--RLSSMLR--EQ-LRDRRR--
TRA--LENELGSL--T-----RLN-HQFD-----
-----W-----FSSCE-----EP-----
-----
---VGKC-----

```



```

NG-----PDCS-----LNPGRN-----R-YTVMMSGTPEKI
LELLLEA-----VRPDSSAHDPT-ETF-----LG---D-
FLLTHSV--FM-----PSAHLCAALL---HHF-----H-----
-----AEPA--GGTEQEHGIYICNKRQKILRLVSQ
WVTLYGPLLHID-PVAPSFLQ---KLSEL--VNRDT--QLISLLR--EQ-GPERRR-H
CGL---ENGCGNM--SP-----QLKDR-----TIP-----
-----IW-----FPSYD-----DH-----
-----F-----
---LSNR-----

```

```
>Rapgef3 [Scleropages formosus] 938064599
```

[illegible]

-----SSLE-----KT-----  
-----PLPEAEDT---QD-TIKQ-----FLS-----  
-----DRIL-----KA-----ARVVY-STLMERN  
PG-L-----IRDRKHH-----L-KTY-----RQC-CS  
GK-----ELVDWLMKLN-----D  
----CFQ-----SRSQAVGMW---QVLVDEGILS-----  
-----H-----VKQ-ELNFHDKDTQFHRFMEA  
-----EF-----  
-D-----LNHTTNEKDSK-----  
-----DDEL-----QESLSLLVQMGPDAL-----LTMILRKCP SQRT  
PEDLE-----VIYEELLHVKA VAHLS-TSVRKELA-AVLVFESHAKAGTVL-----  
-----FSQGDKG--TSWYIIW  
RGSINVITHGK-----GL-----VTTLHEG-DDF  
GQLAL-----VNDAPRS---ATIILREDNCHFLRV DKQDFIR-----ILKD--  
-----V-----  
-----  
-----EANTVRLEE HGQVVLVHLS-----T-----  
YQ-----GG-----SSSS-----K-YTVMSGTPEKI  
LEHMLEM-----IKLETNGTDFI-DP-----SVT---D-  
FLLTHPV--FM-----PCSQLCAALQ-----HHY-----Q-----  
-----VEPSE---GTDLEKAAYALNTKQKVVKLV AH  
WVALYGPLL RDN-PVASEFLE---KFREA--VMADS--RLSSMLR---EQ-LRDRRK--  
TKI---TENGCHTL--T---KLN-QKFD-----  
-----W-----FSAYE-----EP-----  
-----  
--VGKL-----  
-----  
-----  
-----  
-----RSIKAQDK--VL-----YE-----  
IFKPDHKAVTVILPVDASVKDILT-----TLVDPE-----RDY--VL  
VKMNSS-----G-----DRVQLKLETTAVSASLG VNEKLF LC  
SASQ---V-NQLT-PVKEQL-----GP-----EKT TM  
DT--LEQMCSKDMASQHTSYDWELFMAMHEVELVY-----YVLGREKF-LGATTANLE  
RFVRR-----FNEIQYWV-----VTELCLCEDLVKR-----AILLK KFIKMAVVF  
-----KEQKNLNSFFAVMF-GLSNSAVQRLNKTWE-----  
-----RLPNKTKRIYCA-YERLM-----DPSRNH--  
-RAYRL---AVAK-----LSPPYI-PFMP-----  
LLLKDMTFIHEGNK--NY-TD-----K-LVNFE-KM  
-----RM---IARTVKTVRQCRSQPY-----VPSSPQKG  
LTERMFLDAQAIRLSTYSDQSLTLR-----S-----PANIRQ-----YI  
QNLKVIDNQKKL-----TQLSRAI  
-----ER-----  
-----  
-----  
-----  
-----  
-----  
-----  
-----  
-----



-----  
---  
>Rapgef3\_[Sinocyclocheilus\_grahami]\_1020398505  
-----  
-----  
-----  
-----  
-----  
-----MCSEDTFLLMSLR-----  
-----SSLE-----KT-----  
-----PLPEAEDT---QD-TIKQ-----FLS-----  
-----DRIL-----KA-----ARVVY-STLMERN  
PG-L-----IRDRKHH-----L-KTY-----RQC-CS  
GK-----ELVDWLMKLN-----D  
-----CFQ-----SRSQAVGMW---QVLVDEGILS-----  
-----H-----VKQ-ELNFHDKDTQFYRFMEA  
-----EF-----  
-D-----LNHTTNEKDSK-----  
-----DDEL-----QESLSLLVQMGSDAL-----LTMILRKCP SQRT  
PEDLE-----VIYEELLHV KAVAHLS-TSVRKELA-AVLVFESHAKAGTVL-----  
-----FSQGDKG--TSWYIIW  
RGSINVITHGK-----GL-----VTTLHEG-DDF  
GQLAL-----VNDAPRS---ATIILREDNCHFLRV DKQDFIR-----ILKD--  
-----V-----  
-----  
-----  
-----EANTVRLEE H GQVVLVHLS-----T-----  
YQ-----GG-----SASSS-----K-YTVMSGTPEKI  
LEHMLET-----IKLETNGTDFI-DP-----SVT---D-  
FLLTHPV--FM-----PCSQLCAALQ-----HHY-----Q-----  
-----VEPSE---GTDLEKAAYALNTKQKVVKLV AH  
WVALYGPLL RDN-PVASEFLE---KFREA--VMADS--RLSSMLR---EQ-LRDRRK--  
TKI---TENGCHTL--T-----KLN-QKFD-----  
-----W-----FSAYK-----EP-----  
-----  
---VGKL-----  
-----  
-----  
-----  
-----RSIKAQDK--VL-----YE-----  
IFKPDHKAVTVMLPVDASVKDILT-----TLVDPE-----SDY--VL  
VKMNSS-----G-----DRVQLKLETTAVSASLG VNEKLFLC  
SASQ---V-KQLT-PVKEQL-----GP-----EKSTM  
DS--LEQMCSKDMASQHTSYDWELFMAMHEVELVY-----YVLGREKF-LGATTANLE  
RFVRR-----FNEIQYWV-----VTELCLCEDLVKR-----AILLKKFIKMAVVF  
-----KEQKNLNSFFAVMF-GLSNSAVQRLNKTWE-----  
-----RLPNKTKRIYCA-YERLM-----DPSRNH---  
-RAYRL---AVAK-----LSPPII-PFMP-----  
LLLKDMTFIHEGNK--NY-TD-----K-LVNFE-KM  
-----RM---IARTVKT VRQCRSQPY-----VPSSPQKG  
LTERMFLDAQAIRLSTYS DQSLTLR-----S-----AANIRQ-----YI  
QNLKVIDNQKKL-----TQLSRAI  
-----ER-----







[illegible]

[illegible]

```

-----GLR-----WT-----
-----PLTNSEESLDFSV-SLEQA-----S-----T-----
-----ERVL-----RA-----GKQLH-RHLLPS-
PG-W-----DRDTQF-----Y-----R-----
-----FPGLEPEP-----A-----
---GVH-----ELEEEELVEA---LTLLSQ-----
-----RGP
-----D-----
-----ALL-----TVALRKPPGQRT
DEELD---L-----VLLFEPHSKAGTVL-----
-----FSQGDKG---TSWYIIW
KGSVNVVTHGK---GL-----VTTLHEG-DDF
GQLXX-----XXXXXXX---XXXXXXEDNCHFLRVDKQDFNR-----I IKD---
-----V-----
-----
-----EAKTMRLEEHGKVVLVLER-----S-----SQG
SG---PSRP-----PTPGRN-----R-YTVMSGTPEKI
LELLLEA-----MRPDSSAHDPT-ETF-----LS---D-
FLLTHSV--FM-----PNAQLCAALL---HHF---H-
-----AEPA---GGSEQECSTYVCNRRQQILRLVSQ
WVALYGPM LHTD-PVATSFLQ---KLSDL--VSKDA--RLSNLLR---EQ-WPERRR-H
HRG---SEGCGDALLSPLGLPFSPLQAR-----HMP-----
----VW-----LPSQD-----EP-----
-----L-----
---PSSN-----
-----
-----
-----
----CAIRAGDK--VP-----YD-----
ICRPDHSVGTLQLPVTASVREVM-----ALAQEDG----WT-----KGQ--VL
VKVNSA-----G-----DAVGLQPDARGVATSLGLNERLRFV
NPQE--V-HELT-PHPEQL-----GP-----TVSSA
EG--LDLVSTKD-----
---RR-----FNELQYWV-----ATELCLCSVPSLR-----AQLLRKFIKLA AHL
-----KEQKNLNSFFAVMF-GLSNSAISRLAHTWE-----
-----RLPHKVRKLYSA-LERLL-----DPSWNH---
-RVYRV---ALTK-----LSPPVI-PFMP-----
LLLK-----GKR-----TSA
---RVP--ASTPSILVSVCLSDPP-----
-----SDSNVLTP-----WS-----TS
SNGESIGWKRS-----

```

-----  
---  
>Rapgef3\_[Takifugu\_rubripes]\_768914878  
-----  
-----  
-----  
-----  
-----MENIV-K  
SICYPPR-----RYTPV-----  
-----MR-----ET-----  
-----PLPESLGS---KD-TMKQ-----FLS-----  
-----DRVV-----KA-----ARSVY-SVMIEKN  
PG-L-----IRDRKYH-----L-KTY-----RQC-CS  
GK-----ELVDWLMKQS-----D  
-----CLQ-----SRSQVGMW---QVLVDEGILV-----  
-----H-----VKQ-ELNFHDKDTQFFRFRDS  
-----ECGLNHVTNER-----  
DA-----  
-----EDEL-----QEGLSLLSQLGPDAL-----LTMILRKCPQSRS  
AEDLE-----VIYEELLHVKAAAHLS-TSVRKELA-AVLVFESHAKAGTVL-----  
-----FSQGDKG--TSWYIIW  
KGSVNVITHGK-----GL-----VTTLHEG-EDF  
GQLAL-----LNDAPRA---ATIILREDNCHFLRVDKQDFIR-----ILKD--  
-----V-----  
-----  
-----EANTVRLEEHGKTVLVLEK-----S-----  
SD----RAEQT-----GAGSNS-----K-YTVMSGTPEKI  
LEHLLLET-----IKLDSNGNDGI-DP-----CVS---D-  
FLLTHKV--FM-----SSSQLCSALL----HQY-----Q-----  
-----AELSK---GSDQEKASYILTAKRKVVKLVC  
WVALYDLLLKED-PVALDFLE----RLKKE--VAADY--RLSGILK---EQ-FRERRR--  
TRI---LDNGYQSL--C-----R-N-QKFD-----  
-----W-----FLHCE-----EP-----  
-----  
---VGRL-----  
-----  
-----  
-----QPIRAHDK--VL-----YE-----  
ICRADSKALTVMLPVNTTVQDVIS-----AVVKPG-----GDH--VL  
VKMNSA-----G-----ERAQLKLDAAVYTALGVNERLFIC  
TSSQ---V-EKLF-PLKEQQ-----GP-----ERGTA  
DI--LGQMGSKDIATELTNYDWELFAAMHEAELIY-----YVFGRHKF-PGATTANLE  
RFVRR-----FNEVQHWV-----VTELCLCEDLVKR-----AVLLKKFIKIASVL  
-----KEQKNLNSFFAVMF-GLSNSAVRRLYKTWE-----  
-----RIPSKTKRIYCS-YERLM-----DPSRNH---  
-RAYRL---TVAK-----LGPPYI-PFMP-----  
LLLKDMTFINEGNP--NY-LE-----K-LVNFE-KM  
-----RM---IAKTVKVVRGCRSHPY-----TPSSPQRS  
LADRMFLDGPTTRMSTCSEHGLLLR-----S-----PSNIRH-----YV  
QNLKVIDNQKRL-----TQLSRTL  
-----EC-----





```
-----  
-----  
-----  
-----  
-----  
-----  
-----  
-----  
-----  
-----  
-----  
-----  
-----  
-----  
-----  
-----  
-----  
  
---  
>Rapgef3_[Tinamus_guttatus]_719772822  
-----  
-----  
-----  
-----MSER-  
--R----GDLSRM-----SAETQG-----P  
VKVAADGNRLSV--LLKKM-----HLFRSSSYEI-----RLEGE-GGSL  
PRIQG-----IRW-----T-  
----PLLD-----SESALDYGH-----SLTQAS--S-----  
-----EKIW-----RAGKLLF-----S--H--LVITC  
PG-L-----IRDHKHH-----L-RHH-----RQC-CS  
GK-----ELVDWLLGAG-----L  
----GVQ-----TRSQAVGVC--QVLVDGGVLT-  
-----H-----VKQ-EWHFQDKDTQFYRFAEL  
E----LSPEP-GHGLRDA-----  
-----  
-----EEL-----LEALGYLAQLGPDAL-----LTMALRKPTQT  
EDELE-----LIFEELLHIKAHAHS-NSVKRELA-AVLMFESHPRAGTV-----  
-----LFSQGDKG--TSWYIIW  
KGSVNVTTHGK----GL-----VATLHEG-DDF  
GQLAL-----VNDAPRA--ATIILREDNCHFRLVDKQDFNR-----ILKD--  
-----V-----  
-----  
-----EANTVRLKEHGKVVLILHKNL-----QG  
G-----SSQS-----VTARSS-R-----YSVMAGTPKI  
LEHLLLF-----MRDATLYDPA-G-----E-G--D-  
SIHLPLP--FS-----EENRLCRALL-----HHF-----R-----  
-----AEPLE---GSEQEKATYSLHKRRKILRLVSQ  
WVLLYGRLAQD-RSTALLQ---NLAD--LASQDP--RLGGMVQ---EQ-AQDQRR--  
PRP---LENGGGSV--SP---QPKARS-----SVN-  
-----W-----FSGQE-----EA-----  
-----IL-----  
-----NSSC-AL-----RAODK-----
```





```

-----EEL-----VEALALLSQRPDAL-----LTVALRKPPGQRT
DEELE----LIFEELLHVKAVALHS-NSVKRELA-AVLLFEPHISKAGTVL-----
-----FSQGDKG--TSWYIIW
KGSVNVVTHGK----GL-----VTTLHEG-DDF
GQLAL-----VNDAPRA--ATIILREDNCHFLRVDKQDFNR-----IIKD--
-----V-----

```

```

-----EAKTMRLEEHGKVVLVLER-----T-----SQG
AG-----LSRP-----PTPGRN-----R-YTVMMSGTPEKI
LELLLEA-----MRPDSSAHDPT-ETF-----LS---D-
FLLTHSV--FM-----PNAQLCAALL--HHF-----H-
-----AEPA---GGSEQERSTYICNKRQQILRLVSQ
WVALYGPMLHTD-PVATSFLQ---KLSDL--VSRDT--RLSNLLR--EQ-WPERRR-H
HRL---ENGCGNA--SP---QMKAR-----NVP-
---AW---LPSQD---EP-----
-----F-----
---SSSA-----

```

```

-----CAIRVGDK--VP-----YD-----
ICRPDHSVLTQLPVTASVREVMV-----ALSQEDI-----CT-----KGQ--VL
VKVNSA-----G-----DAIGLQPDARGVATSLGLNERLFVV
NPQE---V-HELT-PHPEQL-----GP-----TVGSA
EG--LDLVSAKDLAQLTDHWNLFNSIHQVELIH-----YVLGPQHL-RDVTANLE
RFMRR-----FNELQYWV-----ATELCLCPVGPGR-----AQLLRKFIKLAHL
-----KEQKNLNSFFAVMF-GLSNSAISRLAHTWQ-----
-----RLPHKVRKLYSA-LERLL-----DPSWNH---
-RVYRL---ALTK-----LSPPII-PFMP-----
LLLKDMTFIHEGNH--TL-VE-----N-LINFE-KM
-----RM--MARAVRMLHHCRRSHSV-----VPLSPLRS
RVSHLHEDSQVARISTCSEPSLSTR-----S-----PASTWA-----FV
QQLKVIDNQREL-----SRLSREL
-----EP-----

```

```
>Rapgef3 [Tursiops truncatus] 470596594
```

-----MVLRRMHRSRSCSYQ-L  
LLE-----HQRP-S-----CIQ-----

```

-----GLR-----WT-----
-----PLANSEESLDFSV-SLEQA-----S-----T-----
-----ERVL-----RA-----GRQLH-RHLLATC
PN-L-----IRDRKYH-----L-RLH-----RQC-CS
GR-----ELVDGILALG-----L
----GVH-----SRSQAVGIC---QVLLDEGALC-----
-----H-----VKH-DWAFQDRDQTQFYRFPGP
-----EPEP--AGLHEL-----
-----
-----EEEL-----LEALALLSQRGPDAL-----LTVALRKPPGQRT
DEELD----LIFEELLHIKAVAHLS-NSVKRELA-AVLLFEPHSKAGTVL-----
-----FSQGDKG--TSWYIIW
KGSVNVVTHGK----GL-----VTTVHEG-DDF
GQLAL-----VNDAPRA--ATIILREDNCHFRLVDKQDFNR-----IIKD--
-----V-----
-----
-----EAKTMRLEEHGKVVLVLER-----T-----SQG
TG----PSRP-----PTPGRN-----R-YIVMSGTPEKI
LELLLEA-----MRPDSSAHDPT-ETF-----LS---D-
FLLTHSV--FM-----PTAQLCAALL----HHF-----H-
-----AEPM--GGSEQECSTYICNKRQQILRLVSQ
WVALYGPMLHTD-PVATSFLQ---KLSDL--VSRDA--RLCNLLR--EQ-WPERRR-H
HRL---ENGCGNA--SP---QMKA-----NMP-----
----VW-----LPSQD-----EP-----
-----L-----
---PSSN-----
-----
-----
-----
-----CAIRVGDK--VP-----YD-----
ICRLDHSVLTQLPVTASVREVM-----ALAQEDG-----WT-----KGQ--VL
VKVNSA-----G-----DTVGLQPDAGVATSLGLNERLFVV
NPQE---V-HKLT-PHPEQL-----GP-----TVGSA
EG--LDLVSTKDLAQQLTDHDSWLSFNLSIHQVELIH-----YVLGPQPL-RDVTTANLE
RFMR-----FNELQYWV-----ATELCLCPVPGLR-----AQLLRKFIKLAHL
-----KEQKNLNSFFAIMF-GLSNSAISRLAQTWE-----
-----RLPHKVRKLYSA-LERLL-----DPSWNH---
-RVYRL---ALTK-----LSPPLI-PFMP-----
LLLKDMTFIHEGNH--TL-VE-----N-LINFE-KM
-----RM--MARAAARMLHHCRRSHN-----VPLSPLRS
RVSHLHEDSQAARISTCSEQSLSTR-----S-----PASTWA-----YV
QQLKVIDNQREL-----SRLSREL
-----EP-----

```

-----  
---  
>Rapgef3\_[Ursus\_maritimus]\_671024230  
-----  
-----M-----  
-----  
-----K-----VGWPGES-----  
-----RWQVGLAVED-SPALGASQVGG---LPVVPEGTLLNMVLKRVHRPRSCSYQ-L  
LLE-----HQRPS-----RIQ-----  
-----GLR-----WV-----  
-----TWEDSEESLDFSV-SLEQA-----S-----A-----  
-----ERVL-----RA-----GKQLH-RHLLATC  
PT-L-----IRDRKYH-----L-RLY-----RQC-CS  
GR-----ELVDGILALG-----L  
-----GVH-----SRSQAVGIC---QVLLDEGALC-----  
-----H-----VKH-DWTFQDRDTQFYRFPGS  
-----EPEP--VGIHEL-----  
-----  
-----EDEL-----VEAVALLSQRGPDAL-----LTVALRKPPGQRT  
DEELD-----LIFEELLHIKAVAHLS-NSVKRELA-AVLLFEPHSGAGTVL-----  
-----FSQGDKG--TSWYIIW  
KGSVNVVTHGK-----GL-----VTTLHEG-DDF  
GQLAL-----VNDAPRA---ATIIILREDNCHFLRVDKQDFNR-----IIKD--  
-----V-----  
-----  
-----EAKTMRLEEHGKVVLVLER-----A-----SQG  
AG-----PSRP-----PTPGRN-----R-YTVMSGTPEKI  
LELLLEA-----MRPDSSAHDPT-ETF-----LS---D-  
FLLTYSV--FM-----PSAQLCAALL---HHF-----H-----  
-----AEPS---GGSEQEHSTYICNRRQQIILRLVGG  
WVALYGPM LHTD-PVATSFLQ---KLSDL--VSRDT--RLCILLR---EQ-WPERRR-H  
HRL---ENGCGNA--SP---QMKAR-----NMA-----  
-----VW-----LPGQD-----QP-----  
-----L-----  
---PSSN-----  
-----  
-----  
-----CAIRVGDK--VS-----YD-----  
ICRPDHSVLTCLKLPVTASVREVMA-----ALAQEDG-----WT-----KGQ--VL  
VKVNSA-----G-----DAIGLQPEARGVATSLGLNKALF--  
-----HLQT-PHPEQL-----GP-----TVGSA  
EG--LDLVSADLAGQLTDHDWNLFNSIHQVELIH-----YVLGPQHL-RG-----  
-----RPAVVWV---GALGVWLFP-----LRSSGSSAHS  
-----KEQKNLNSFFAVMF-GLSNSAISRLAHTWE-----  
-----RPPHKVRKLYSA-LERLL-----DPSWNH--  
-RVYRL---ALTK-----LSPPII-PFMP-----  
LLLKDMTFIHEGNH--TL-VE-----N-LINFE-KM  
-----RM-----MARVRS  
RVSHLHEDSQAARTSTCSEQSLSTR-----S-----PASTWA-----YV  
QQLKVIDNQREL-----SRLSREL-----  
-----EP-----





```
RFMR-----FNEQYVW----ATELCPCVPGLR-----AQLLRKFIKLAHL
-----KEQKNLSFFAIMF-GLSNSAISRLAHTWE-----
-----RLPHKVRKLYSA-LERLL-----DPSWNH---
-RVYRL---ALTK-----LSPPVI-PFMP-----
LLLKDMTFIHEGNH--TL-VE-----N-LINFE-KM
-----RM--MARAAARMLHHCRRSHN-----VPLSPLRS
RVSHLHEDSQAMRISTCSEPSLITR-----S-----PGSTWA-----SI
QQLKVIDNQREL-----SRLSREL
-----EP-----
```



PQISAGNNHQP-----AGASNQ-----K-YTVMSGTADKI  
 LEHLLET-----IKLDSCTED---SF-----AG---D-  
 FLLTHSI--FM-----PTTQLCQALL---HQF-----N-----  
 -----VEPSE---VNEPEKATYSLHKRQNILHLVSL  
 WVALYGKLLAE-PSAKSFLE---KLSEH--VSRDP--RLLAFWR--EN-LQDRRK--  
 TRT---LEVSSGNH--SPQ---IKIN-SFGN-----  
 -----L-----FSSLE-----ED-----  
 -----A-----  
 ---SSNT-----

```
>Rapgef4 [Acanthisitta chloris] 677973646
```

-----DEEL-----QDTMLLSQIGPDAH-----MRMILRKPPGQRT  
VDDLE----FIYEELLHIKALSHLS-TTVKRELA-GVLIFESHPKAGTVL-----  
-----FNQGEEG--TSWYIIL  
KGSVNVVIYGK----GV-----VCTLHEG-DDF  
GKLAL-----VNDAPRA--ASIVLREDNCHFLRVDKEDFNR-----ILRD--  
-----V-----

-----EANTVRLKEHDQDVLVLEK-----I-----PAG  
NR---VSNQG-----NSQPQH-----K-YIVMSGTPEKI  
LEHFLET-----MRLEATLNEATDSVLNDFIMMHCVFMPNSQLCPALMAQYP-  
F-----

```
>Rapgef4 [Acinonyx jubatus] 961712463
```

-----MAG-L  
LAPPYG--VMETGS--N-N-----DRIPDKE-----

```

-----N-----
-----TPLIEPHVPLRP-----
---ANTITKVMG---C-----RA-----GKILR-NAILSRA
PH-M-----IRDRKYH-----L-KTY-----RQC-CV
GT-----ELVDWMLQQT-----
---PCVH-----SRTQAVGMW---QVLVEDGVLN-----
-----H-----VDQ-EHHFQDKY-LFYRFLDD
-----EHED---AP-L-----
-----PT
EEEE--KECDEEL-----QDTMLLLSQMGPDH-----MRMTLRKPPGQRT
VDDLE-----IIYEELIHIKALSHLS-TTVKRELA-GVLIFESHAKGGTVL-----
-----FNQGEEG--TSWYIIL
KGSVNVVIYKG-----GV-----VCTLHEG-DDF
GKLAL-----VNDAPRA--ASIVLREDNCHFRLVDKEDFNR-----ILRD--
-----V-----
-----
-----
-----EANTVRLKEHDQDVLVLEK-----VPA-GNRASNQG
NS---QP-QQ-----K-YTVMSTGTPPEKI
LEHFLET-----IRLEP-ALN-----EA-----TDSILN---D-
FVMMHCV--FM-----PNTQLCPALV-----A-----
-----H-----Y-----HAQPSQ--GTEQEKTDYTLNNKRRVIRLVLQ
WAAVHGDVLQED-DVAMAFLE---EFYVS--VSDDA--RMIAALK--EQ-LPELEKIV
KQI--SED--AK-----APQKK-----
---HKV-----LLQQFNTGD-ERAQ-KRQ-----
-----
-----
-----
-----
-----PVRGSDE--VL-----FK-----
VYCMDHTYTTIRVPVAASVKEVIS-----AVADK-----LGSG-EG--LII
VKMSSG-----GEKV-----LKPNDVSVFTTLTINGRLFAC
PREQ---F-DSLT-PLPEQ-----EGP-----TVGTM
GT--FELMSSKDLAYQMTIYDWELFNCVHELELIY-----HTFGRHNF-KK-TTANLD
LFLRR-----FNEIQFWV-----VTEICLCSQPSKR-----VQLLKKFIKIAAH-
-----CKEYKNLNSFFAIVM-GLSNVAVSRLALTWE-----
-----KLPSKFKKFYAE-FESLM-----DPSRNH--
-RAYRL---TVAK-----LEPPLI-PFMP-----
LLIKDMFTTHEGNK--TF-ID-----N-LVNFE-KM
---RM---IANTARTVRYCRS--Q-----PFNPD--
-A-----AQANKNH--Q-----DVR-----YV
RQLNVIDNQRTL-----SQMSHRL
-----EPRR-----P-----

```



```
>Rapgef4_[Acyrtosiphon_pisum] 641671152
-----M-----LYRQGEI-----GSSWYAVL-----
-----GGSLEARL-----T-----HTTQ-----
-----TSSTNTDK-----
-----AVVSLDVGATFGESIVHDL-PRDMTVC-TKTTCELLRIHQNDFKKIWD-----
KHSN--LMKDLI-----A-SNKLRLNGMASGN-L-----SKCQSP--P
VMTQA-----R--RTITPDNPDPAE-----
-----
-----VITE-----
-----NPSMPMARA-----GWVLR-TLLLSDDQ
NT-V-----LRDRKTGG-----G-RSV-----VRRC-AS
GS-----ELIDWLMNLV-----
---STDH---DSFSRHDVIGMW---QALLEEGVIS-----
---H-----ATG-EHPFKDKC-LFYNFWQD
R-----E---G-----
-----ALNTPT
IQDV--AEAEHL-----DEALQELVHRGPDH-----LRLILRSPSSERT
PEDLE----LIFEELSEQKALAHLP-NSVKRELA-SVVVFEAHPKAGHTL-----
-----FRQGDDG--KAWYVIM
QGAVSVETYSK----GI-----VESLYEG-EDF
GGLAL-----IHNVPRS--ATITVKEDNTHLLRVDKDSYNK-----IVRD--
-----I-----
-----
-----EANTVRLKELGSDVLVLE-----K-----
-----SPRLH-----K-----YMI IAGTPQKI
LEHLLH-----RLST-----T-----NVAGSRN-----DPCLD---D-
FLLTHIV--FM-----PTRTLVSELN-----K-----
-----YYHM-----ENPAQDREY TINCKRKVVQFVYR
WVTIRHPVFDD-VVSMSELE---ELASD--VEADC-----QLLGK-SQALQEEA
SLM-----
---HHI-----MSRLRRYQD-ERLETSGLK-----
---WKLPP--GGQPIC-----LFSAIN--
---PSKNNRPI-----
-----
-----
-----IRPNDD--II-----FR-----
VYCADHTFCTLRLAVNATAETIKV-----GAYEK-----CSLRHPVQDLRI
VEVKS-----GERVP-----FRDSEHSIPTTVALNSCIFLT
PKDH--M-DALT-CVPEQ-----E-K-----SEGAE
ISGDFDSLSTKELAYHMTLFDWELFWNVHEYELIY-----LTFGRHRF--OOITANL
```





[illegible]

```
NS---QP-QH-----K-YIVMSGTPEKI  
LEHFLET-----MRLES-TVN-----EA----TDSVLN---D-  
FVLMHCV--FM-----PNSQLCPALM----A-----  
-----H-----Y-----HAQPSQ--GSEQEKLDYAINNKRVIRLVLO  
WAALYGDLLQED-EAAVAFL-----EFYVS--VSDDT--RMIAALK--EQ-LPELEKV  
KQI--SEE--GK-----TPQKK-----  
---HKV-----LLQLFNTTD-DRAQ-KRQ-----  
  
-----PIRGSD--IL-----FK-----  
VICIDHTYTTRVPVLSSVKEVVS-----AVTDK-----LGSG-EG--LII  
VKMSSG-----GEKV-----LKPNVSVFTTLTVNGRLFAC  
PRDQ--F-DSL-TPLPEQ-----EGP-----STGTV  
GT--FELMSSKDLAYQMTIIDWELFNCVHELELIY-----HTFGRHHF-KK-TTANLD  
LFLRR-----FNEIQFWV-----VTEISLCSQLSKR-----VQLLKYYIKIAAH-  
-----CKEYKNLSFFAIIM-GLSNVAVSRLTLTWE-----  
-----KLPSKFKKIYAE-FESLM-----DPSRNH--  
-RAYRL--TVAK-----LDPPII-PFMP-----  
LLIKDMFTTHEGNK--TF-ID-----S-LVNFE-KM  
-----RM--IANTIRT VKFCRS--Q-----SFNPD--  
-A-----ALTNNKH--Q-----DVRS-----YV  
RQLNVIDNQRTL-----SQMSHRL  
-----EPRR-----A-----  
  
---  
>Rapgef4_[Amazona_aestiva]_944296700  
-----MVAA-----HT-----SH-----SSS  
SGEWIA--CLDK-----RPLE----RSSDVDIIIFTRLKEVKAFEFHPNL  
QQICLCGY--YENLE--KGITLFRQG DIGMNWYAVLTGS LDVKVSD-TSNHQDA-----  
-----VTICTLGIGTAFGESILDNT-PRHATIV-TREYSELL-----  
-----RIEQKD-----FKALW--EKYRQYMSG-L  
LTPPYG--VMETGS--N-N-----DRMPDKD-----  
-----SMS-----SGALCQVSKNCSKT-----  
-----PLIEPHIPHRSTK-TITQ-----VPS-----  
-----EKIL-----RA-----GKILR-NTILSRA  
PH-M-----IRDRKYH-----L-KTY-----RQC-CV  
GT-----ELVDWMMQQS-----  
---PCVH-----LRTQAVGMW--QVLLEEGLN-----  
-----H-----VDQ-EHHFQDKY-LFYRFLDD  
-----EHED--AP-L-----
```

```

EEEE--KECDEEL-----QDTMLLLSQIGPDAH-----MRMILRKPPGQRT
VDDLE----FIYEELLHIKALSHLS-TTVKRELA-GVLIFESHPKAGTVL-----
-----FNQGEEG--TSWYIIL
KGSVNVIYGK----GV-----VCTLHEG-DDF
GKLAL-----VNDAPRA--ASIVLREDNCHFRLRVDKEDFNR-----ILRD--
-----V-
-----
-----EANTVRLKEHDQDVLVLEK-----IPA-GNRVSNOG
NS---QP-QH-----K-YIVMSGTPEK
LEHFLET-----MRLEA-TLN-----EA---TE-----
-----QLKEHLK-----G-
-----M-----T-----DFAPSQ--GTEQEKMDYALNNKRRVIRLVLO
WAALYGDLLQED-EAAMAFLE-----
-----HKV-----LLQLFNTSD-DRAQ-KRQ-----
-----
-----PIRGSD--VL-----FK-----
VYCIDQTYTTIRVPVSSSVKEVIS-----AVADK-----LGSG-EG--LII
VKMSSG-----GEKV-----LKPHDVSVFTTLNVNGRLFAC
PRDQ--F-DSLA-PLPEQ-----EGP-----SAGTV
GT--FELMSSKDLAHQMTIYWELFNCVHEDPSRN-----H---RAY-RL-TVAKLD
-----PPI-----IPFMPLLIKVK-----
-----EDFGDLIAFML-GCSDRTVVSAAMGDI-----
-----TL---KSIVE-LYLLLPL-----
-----
-----
>Rapgef4_[Amphimedon_queenslandica]_761901406

```

-----  
-----  
-----  
-----MYTYKRC-CS  
GQ-----SLVNWVIKQS-----  
----AVN-----RSRQQVIAMW---QALLCDGIIE-----  
-----H-----TLNE-HNQFLDDD-KIYYRFVD  
RPI-----PES-----AKLANSPGASGRFEY-----RRTQSC  
DSSI-----LESPIMSRSTH-----NSISSGVEGGGGGGGGSPT  
SSPR-----SSLSS--LLEDCELFIAQLGPEAL-----IYATLIKSPDNRS  
DDDIQ-----LIYEELLHVKAFGHLS-NAIKEELA-SVVQLENHPVAGKYL-----  
-----FKEGDAG--TSWYIIL  
KGSVNVLV-GKD----V-----MCTLHEG-DEF  
GKLAL-----LNNAPRT---TSVQLREPNCVFLRVDRDDFTR-----ILLS--  
-----V-----  
-----  
-----EKNTVKIKEHGKEVLLLEKS-----T-----  
GG-----K-YLVVKGTPQKM  
LEYLLTLDISPGG-----RDAAIDESFA-----C---D-  
FFLTYPA--FI-----SVSELCDGLI----KCYDS---QAPPTPSPL-  
-----ERPR---SM-----STE--SLPAE-----ATEEQLLTRRKRVVWAVSI  
WVSMKAIEVVKD-PTFQKLLQYLQKSLAKD-GLEEDQR-NLNMCLM---DT----IKRSS  
YHE--GTKGGGSSGLSIPF---PMKK-----P-----  
-----SVSE-----IKIELG-----  
-----I-----  
-----C-AV-----  
-----  
-----  
-----P-----  
-----PCQPNDT--VN-----LR-----  
IHTIDKKCCRLHVKLSSTSRDILTE-----ACSKLGLD-----LSSH--E---L  
CEIKST-----GEKII-----FKETDLSIATEMTVNGRLYAL  
PKDS---E-AAIS-PLPDQNQKPI-----APFP-----  
-----ESEGSREIAAHLTSYDWNLFQNIQOMELIY-----QVFGRHRF--SRITSNLD  
VMIRR-----FNEVQYWT-----VTEICKESNLQKR-----VKIIQKFIKIASHC  
-----KSFNNLNCFFAIVV-GLMNGAITRLKQTWE-----  
-----KVSVKLRRRYEQ-FEALM-----DPSRNH-----  
-RVLRA---YQOK-----LQPPII-PFMP-----  
LIVKDAFFLQEGNE--TF-VD-----G-LVNFE-KM  
-----RM---VASKVNDFSYYRKGSLANEI-----  
-----KMLSNKNS-----ELQR---YI  
RDFKVIDSQQVL-----MQMSHAI  
ESSKRTQAT---PTS-----  
-----  
-----  
-----  
-----  
-----  
-----  
-----  
-----

-----  
---  
>Rapgef4\_[Anas\_platyrhynchos]\_874471711  
-----  
-----MRRE-----  
-----  
-----RIV-----  
-----SSILQW-----GDTSV---QKYRQYISG-L  
LTPPYG--VMETGS--N-N-----DRMPDKD-----  
-----SMS-----GSSLCQVSKNCNKT-----  
-----PLIEPHIPHRPTK-TITQ-----VPS-----  
-----EKIL-----RA-----GKILR-NAILSRA  
PH-M-----IRDRKYH-----L-KTY-----RQC-CV  
GT-----ELVDWMMQQS-----  
---PCVH-----SRSQAVGMW---QVLLEEGVLN-----  
-----H-----VDQ-EHYFQDKY-LFYRFLDD  
-----ERED---AP-L-----  
-----PT  
EEEE--KECDEEL-----QDTMLFLSQIGPDAH-----MRMILRKPPGQRT  
IDDL-----IIYEELLHIKALSHLS-TTVKRELA-GVLIFESHKAGTVL-----  
-----FNQGEEG--TSWYIIL  
KGSVNVVIYK-----GV-----VCTLHEG-DDF  
GKLAL-----VNDAPRA---ASIVLREDNCHFLRVDKEDFNR-----ILRD--  
-----V-----  
-----  
-----EANTVRLKEHDQDVLVLEK-----IPA-GNRVSNQG  
NS---QP-QH-----K-YIVMSGTPEKI  
LEHFLET-----MRLEV-TLN-----EA-----TDSALN---D-  
FIMMHCV--FM-----PNSQLCPALM---A-----  
-----H-----Y-----HAQPSQ---GTEQEKMDYALNNKRRVIRLVLQ  
WAALYGDLLQED-EAAMAFLE---EFYVS--VSDDT--RMIAALK---EQ-LPELEKIV  
KQV---SEE--PK-----APQKK-----  
---HKV-----LLQLFNTSD-DRAQ-KRQ-----  
-----  
-----  
-----  
-----PIRGSDE--VL-----FK-----  
VYCIDQTYTTIRVPVSSSVKEVIS-----AVADK-----LGSG-EG--LII  
VKMSSG-----GEKV-----LKPHDVSFVTTLSVNGRLFAC  
PRDQ---F-DSLA-PLPEQ-----EGP-----STGTV  
GT--FELMSSKDLAQMTIYDWELFNCVHELELIY-----HTFGRHNF-KK-TTANLD  
LFLRR-----FNEIQFWV-----VTEICLCSQLSKR-----VQLLKYYIKIAAH-  
-----CKEYKNLNSFFAIIM-GLSNVAVSRLSLTWE-----  
-----KLPSKFKKIYAE-FESLM-----DPSRNH---  
-RAYRL---TVAK-----LDPPII-PFMP-----  
LLIKDMFTTHEGNK--TL-TD-----N-LVNFE-KM  
-----RM---IANTVRTVKFCRS--Q-----SFNPD--  
-A-----ALTNKNH---Q-----DVR-----YV  
RQLNVIDNQRTL-----SQMSHRL  
-----EPRR-----A-----



[illegible]





[illegible]

[illegible]

```
-----N-----T-----  
-----PLIEPHIPHRPTK-TITQ-----VPS-----  
-----EKIL-----RA-----GKILR-NTILSRA  
PH-M-----IRDRKYH-----L-KTY-----RQC-CV  
GT-----ELVDWMMQQS-----  
---TCVH-----SRTQAVGMW---QVLLEEGVLN-----  
-----H-----VDQ-EHHFQDKY-LFYRFLDD  
-----ERED---AP-L-----  
-----PT  
EEEE--KECDEEL----QDTMLLLSQIGPDAH-----MRMILRKPPPGQRT  
VDDLE----IIYEELLHIKALSHLS-TTVKRELA-GVLIFESHPKAGTVL-----  
-----FNQGEEG--TSWYIIL  
KGSVNVIYGK---GV-----VCTLHEG-DDF  
GKLAL-----VNDAPRA--ASIVLREDNCHFRLRVKD EDFNR-----ILRD--  
-----V-----  
  
-----EANTVRLKEHDQDVLVLEK----VPA-GNRVSNQG  
NS---QP-QH-----K-YIVMSGTPEKI  
LEHFLET-----MRPEA-TLN-----EA---TDSVLN---D-  
FIMMHCV--FM-----PNSQLCPALM-----A-----  
-----H-----Y-----HAQPSQ---GTEQEKM DYALNNKRRVIRLV LQ  
WAALYGDLLQED-EAAMAFLE---EFYVS--VSDDT--RMIAALK---EQ-LPELEKIV  
KQV---SEE--SK---APQKK-----  
---HKV-----LLQLFNTSD-DRAQ-KRQ-----  
  
-----PIRGSD--VL-----FK-----  
VYCIDQTYTTIRVPVSSSVKEVIS-----AVADK-----LGSG-EG--LI I  
VKMSSG-----GEKV V-----LKPHDVSVFTTLSVNGRLFAC  
PRDQ--F-DSL A-PLPEQ-----EGP-----STGTV  
GT--FELMCSKDLAHQM TIYDWELFN CVHELELIY-----HTFGRHNF-KK-TTANLD  
LFLRR-----FNEIQFWV----VTEIC LCSQLSKR-----VQLLK KYIKIAAH  
-----CKEYKNLNSFFAI IM-GLSNVA VSRLSLTWE-----  
-----KLPSKF KKIYAE-FESLM-----DPSRNH--  
-RAYRL---TVAK---LDPPII-PFMP-----  
LLIKDMTF THEGNK--TF-TD-----N-LVNFE-KM  
-----RM--IANTVRTVKFCRS--Q-----SFNP D--  
-A-----ALT NKNH---Q-----DVR S-----YV  
RQLNV IDNQRTL-----SHMSHRL  
-----ELRR-----A-----
```





LFLRR-----FNEIQFVW----VTEICLCSQLSKR-----VQLLKYYIKIAAH-  
 -----CKEYKNLNSFFAIIM-GLSNVAVSRLSLTWE-----  
 -----KLPSKFKKIYAE-FESLM-----DPSRNH-----  
 -RAYRL---TVAK-----LDPPII-PFMP-----  
 LLIKDMFTTHEGNK--TF-TD-----N-LVNFE-KM  
 -----RM--IANTVRTVKFCRS--Q-----SFNPD--  
 -A-----ALTNKNH---Q-----DVRS----YV  
 RQLNVIDNQRTL-----SQMSHRL  
 -----EPRR-----A-----

```
>Rapgef4 [Astyanax mexicanus]_992223431
```

```

-----MEDEESCLIAWSKKRTEQRRSAE-A
ATRD-----SITTMASAGICSPDPLVSS--LLAPGR-----
-----TASD-----QT-----
-----PLPEALDT--QD-TMKQF-----L-----S-----
-----DRIL-----KA-----ARVVF-SALMERN
PG-L-----IRDRKHH-----L-KTY-----RQC-CS
GK-----ELVDWLIKLN-----D
---CFQ-----SRSQAAGMW--QVLVDEGILV-----
-----H-----MKQ-ELNFHDKDTQFYRFMET
-----EFDLNPSTNEKD-----
-----SKE-----
-----DEL-----QEG LALLVQMGPDAL-----LNMILRK-----
-----CVRR-----

```

[illegible]





[illegible]

```
-----N-----T-----  
-----PLIEPHVPLRPAN-TITK-----VPS-----  
-----EKIL-----RA-----GKILR-NAILSRA  
PH-M-----IRDRKYH-----L-KTY-----RQC-CV  
GT-----ELVDWMLQQT-----  
---PCVH---SRVQAVGMW---QVLVEDGVLN-  
-----H-----VDQ-EHHFQDKY-LFYRFLDD  
-----EHED---AP-L-----  
-----PT  
EEEE--KECDEEL----QDTMLLLSQMGPDAH-----MRMILRKPPGQRT  
VDDLE-----IIYEELLHIKALSHLS-TTVKRELA-GVLIFESHAKGGTVL-----  
-----FNQGEEG--TSWYIIL  
KGSVNVIYGK---GV---VCTLHEG-DDF  
GKLAL-----VNDAPRA--ASIVLREDNCHFRLRVKD EDFNR-----ILRD--  
-----V-----  
  
-----EANTVRLKEHDQDVLVLEK----VPA-GNRASNQG  
NS---QP-QQ-----K-YTVMMSGTPEKI  
LEHFLET-----IRLEP-ALN-----EA---TDSVLN---D-  
FVMMHCV--FM-----PNTQLCPALV---A---  
-----H-----Y-----HAQPSQ---GTEQEKM DYALNNKRRVIRLVLO  
WAAYVGDLQED-DVAFAFLE---EFYVS--VSDDA--RMIAALK---EQ-LPELEKIV  
KQI---SED--AK---APQKK-----  
---HKV-----LLQQFNTGD-ERAQ-KRQ-----  
  
-----PIRGSD--VL-----FK-----  
VYCMDHTYT TIRVPVAASVKEVLS-----AVADK-----LGSG-EG--LI I  
IKMSSG-----GEKV V-----LKPNDVSVFTTLTINGRLFAC  
PREK---F-DSL T-PLPEQ-----EGP-----TVGTM  
GT--FEL MSSKDLAYQMTVYDWDLFSCVHELELIY-----HTFGRHHF-KK-TTANLD  
LFLRR-----FNEIQFWV-----VTEIC LCSQPSKR-----VQL LKKFIKIAAH  
-----CKEYKNLNSFFAIVM-GLSNVAVSRLALTWE-----  
-----KLPSKF KFYAE-FESLM-----DPSRNH---  
-RAYRL---TVAK---LDPPLI-PFMP-----  
LLIKDMTF THEGNK--TF-ID-----N-LVNFE-KM  
-----RM---IANTARTVRYCRS--Q-----PFNPD--  
-A-----AQANKNH---Q-----DVRS---YV  
RQLNVIDNQRTL-----SQMSHRL  
-----EPRR-----P-----
```

-----  
---  
>Rapgef4\_[Balearica\_regulorum\_gibbericeps]\_723568217  
-----MGAR-----PV-----SEVWLLQQLLKLFLGLYPA---DVMEIQQLPHKDPERPLE----RSEDVDIIFTRLKEVKAFEKFHPNLLQQICLCGY--YENLE--KGITLFRQGDIGTNWYAVLTGSLDVKVSD-TSNHQDA-----  
-----VTICTLGIGTAFGESILDNT-PRHATIV-TREYSELL-----  
-----RIEQKD-----FKALW---EKYRQYMSG-L  
LTPPYG--VMETGS--N-N-----DRMPDKD-----  
-----N-----T-----  
-----PLIEPHIPHRPTK-TITQ-----VPS-----  
-----EKIL-----RA-----GKILR-NTILSRA  
PH-M-----IRDRKYH-----L-KTY-----RQC-CV  
GT-----ELVDWMMQQS-----  
---PCVH-----SRTQAVGMW---QVLLEEGVLN-----  
-----H-----VDQ-EHHFQDKY-LFYRFLDD  
-----ERED---AP-L-----  
-----PT  
EEEE--KECDEEL-----QDTVLLLSQIGPDAH-----MRMILRKPPGQRT  
VDDLE-----IIYEELLHIKALSHLS-TTVKRELA-GVLIFESHKAGTVL-----  
-----FNQGEEG--TSWYIIL  
KGSVNVVIYGK----GV-----VCTLHEG-DDF  
GKLAL-----VNDAPRA---ASIVLREDNCHFLRVDKEDFNR-----ILRD--  
-----V-----  
-----  
-----EANTVRLKEHDQDVLVLEK-----IPA-GNRVSNQG  
NS----QP-QH-----K-YIVMSGTPEKI  
LEHFLET-----MRLEA-TLN-----EA-----TDSVLN---D-  
FIMMHCV--FM-----PNSQLCPALM---A-----  
-----HY-----HAQPSQ---GTEQEKMDYALNNKRRVIRLVLQ  
WAALYGDLLQED-EAAMAFLE---EFYVS--VSDDT--RMIAALK---EQ-LPELEKIV  
KQV---SEE--PK-----APQKK-----  
---HKV-----LLQLFNASD-DRAQ-KRQ-----  
-----  
-----  
-----PIRGTDE--IL-----FK-----  
VYCIDQTYTTIRVPVSSSVKEVIS-----AVADK-----LGSG-EG--LII  
VKMSSG-----GEKVV-----LKPHDVSFVTTLSVNGRLFAC  
PRDQ---F-DSLA-PLPEQ-----EGP-----STGTV  
GT--FELMSSKDLAQMTIYDWELFNCVHELELIY-----HIFGRHNF-KK-TTANLD  
LFLRR-----FNEIQFWV-----VTEICLCSQLSKR-----VQLLKKYIKIAAH-  
-----CKEYKNLNSFFAIIM-GLSNVAVSRLSLTWE-----  
-----KLPSKFKKIYAE-FESLM-----DPSRNH---  
-RAYRL---TVAK-----LDPPII-PFMP-----  
LLIKDMFTTHEGNK--TF-TD-----N-LVNFE-KM  
-----  
-----







[illegible]

```
>Rapgef4 [Buceros rhinoceros silvestris] 676701775
```



-----F-----H-----  
-----AQPSQ---GTEQEKMDYALNNKRRVIRLVLQ  
WAALYGDLLQED-EAAMAFLE---EFYVS--VSDDT--RMIAALK---EQ-LPE-----  
-----LEKIVKQV--SE-----EPKASQ-----KKH-----  
-----K-----VLLQ-----  
-----L-----  
-----FNTS-DD-----RAQKR-----  
-----QPIRG-----  
-----SD-----  
-----EVL-----FK-----  
VYCVDQTYTTTIRVPVSSSVKEVIS-----AVADKLG-----SGEG-LII  
VKMSSG-----G-----

---  
>Rapgef4\_[Callorhinchus\_milii]\_632945696  
-----

-----M-NKYRQYMAG-L  
LAPPYG--VMETGS--S-N-----NRISDKE-----  
-----NMN-----TNVLCPVSKNTNKT-----  
-----SIIETRLALQPAK-SITQ-----VPS-----  
-----EKIL-----RA-----GKILR-NAIVTQA  
PH-M-----IRDRKYH-----L-KTY-----KQC-CV  
GT-----ELVDWMMQQS-----  
---TCVH-----SRSQAVGMW---QALLEEGVVN-----  
-----H-----VDQ-EYNFQDKY-LFYRFLDD  
-----EQED---AL-V-----  
-----PT  
DGEM--KECEEEEL-----QETMLLLSQIGPDAH-----MRMILRKLPQGORT  
VDDLE-----FIYEELLHIKALSHLS-TTVKRELA-GVLIFESHAKAGTVL-----  
-----FNQGEEG--TSWYIIL  
KGSVNVVIYKG-----GV-----VCTLHEG-DDF  
GKLAL-----VNDAPRA---ASIVLHEDNCHFLRVDKEDFNR-----ILRD--  
-----V-----

-----EANTVRLKEHEQDVLVLEK-----IPT-CSRASVQG  
ST---QT-QY-----K-YTVMSGTPEKI  
LEHFLET-----LRLEL-PSN-----ET-IVSQTDKFLD---D-  
FVLMHCV--FM-----PNSQLCPALM---A-----  
-----H-----Y-----HSEAFQ---GSEQEKTDYALNNKRRVIRLILK  
WTNVYLDLLQED-EIAMAFLE---EFYVS--VSDDS--RMIPALK---EQ-LPELEKLV  
KPN---LEEASSK-----TSQKK-----  
---HKI-----ILRQFSIGE-ERLQ-KRQ-----

-----PIRSIDE--IL-----FK-----  
VYCADHTYITIRVPVAASVKEVIS-----AVADK-----LGSG-ED--LIL  
VKISSA-----GERVV-----LKPNDVSVFTSLNVNGRLFVC  
PREH---F-DSLT-PLPEQ-----EGL-----STGTM  
TI--FELMSSKDLAQITIYDWELFNCVHELELVY-----HTFGRQNF-KK-TTANLD  
LFLRR-----FNEIQFWV-----VTETCLCPQLSKR-----VQLLKKFIKVAAH-  
-----CKEYRNLNSFFAIVM-GLSNVAVSRLSQTWE-----  
-----KLPSKFKKIYSE-FESLM-----DPSRNH---  
-RAYRL---TVAK-----LESPII-PFMP-----  
LLIKDMFTTHEGNK--TF-ID-----N-LVNFE-KM  
-----HM---IGNTIRTVRYCRS--Q-----SFNTD--  
-----SIANKNH---Q-----DVRV-----YV  
RQLNVIDNQRTL-----SQLSHRL  
-----EPRR-----S-----



[illegible]



NS---QP-QH-----K-YTVMSGTPEKI  
LEHFLET-----IRLEP-ALN-----EA-----TDSVLN---D-  
FVMMHCV--FM-----PNTQLCPALV-----A-----  
-----H-----Y-----HAQPSQ--GTEQEKMDYALNNKRRVIRLVLQ  
WAAMYGDVLQED-DVAMAFLE---EFYVS--VSDDA--RMIATLK---EQ-LPELEKIV  
KQI---SED--AK-----TPQKK-----  
---HKV-----LLQQFNTGD-ERAQ-KRQ-----  
-----  
-----  
-----  
-----  
-----  
-----  
-----PIRGSDV--VL-----FK-----  
VYCMDHTYTTIRVPVAASVKEVLS-----AVADK-----LGSG-DG--LII  
VKMSSG-----GEKVV-----LKPNDVSVFTTLTINGRLFAC  
PREQ--F-DSLTL-PLPEQ-----EGP-----TVGTV  
GT--FELMSSKDLAYQMTIYDWELFNCVHELELIY-----HTFGRHHF-KK-TTANLD  
LFLRR-----FNEIQFWV-----VTEICLCSQPSKR-----VQLLKKFIKIAAH-  
-----CKEYKNLNSFFAIVM-GLSNVAVSRLALTWE-----  
-----KLPSKFKKFYAE-FESLM-----DPSRNH---  
-RAYRL---TVAK-----LEPPLI-PFMP-----  
LLIKDMFTFHEGNK--TF-ID-----N-LVNFE-KM  
-----RM---IANTARMVRYCRS--Q-----PFNPD--  
-A-----AQANKNH-----Q-----DVRN---YV  
RQLNVIDNQRTL-----SQMSHRL-----  
-----EPRR-----P-----

[illegible]

```
-----GVS-----SSALCQV-----VPS-----  
-----SK-NCNK-----RA-----GKILR-NTILSRA  
PH-M-----IRDRKYH-----L-KTY-----RQC-CV  
GT-----ELVDWMMQQS-----  
---PCVH-----SRTQAIGMW---QVLLEEGVLN-----  
-----H-----VDQ-EHHFQDKY-LFYRFLDD  
-----EHED---AP-L-----  
-----PT  
EEEE--KECDEEL----QDTMLLLSQIGPDAH-----MRMILRKPPGQRT  
IDDL-----IIYEELLHIKALSHLS-TTVKRELA-GVLIFESHPKAGTVL-----  
-----FNQGEEG--TSWYIIL  
KGSVNVIYGK---GV-----VCTLHEG-DDF  
GKLAL-----VNDAPRA--ASIVLREDNCHFRLRVKDKNR-----ILRD-----  
-----V-----  
  
-----EANTVRLKEHDQDVLVLEK-----IPA-GNRVSNQG  
NP---QP-QH-----K-YIVMSGTPEKI  
LEHFLET-----MRPEA-TLN-----EA---TDSVLN---D-  
FIMMHCV---FM-----PNSQLCPALM-----A-----  
-----H-----Y-----HAQPSQ---GTEQEKMMDYALNNKRRVIRLVLO  
WAALYGDLLQED-EAAMAFLE---EFYVS--VSDDT--RMIAALK---EQ-LPELEKVV  
KQV---SEE--PK---APQKK-----  
---HKV-----LLQLFNTSD-DRAQ-KRQ-----  
  
-----PIRGSDV-VL-----FK-----  
VYCIDIQTYYTTRVPVSSSVKEVIS-----AVADK-----LGSG-EG--LI I  
VKMSSG-----GEKV-----LKPHDVSVFTTLNVNGRLFAC  
PRDQ---F-DSL A-PLPEQ-----EGP-----STGTI  
GT--FELMSSKDLAHQMTVYDWELFNCVHELELIY-----HTFGRHNF-KK-TTANLD  
LFLRR-----FNEIQFWV-----VTEICLCSQLSKR-----VQLLK KYIKIAAH  
-----CKEYKNLNSFFAIIM-GLSNVAVSRLSLTWE-----  
-----KLPSKFKKIYAE-FESLM-----DPSRNH---  
-RAYRL---TVAK-----LDPPII-PFMP-----  
LLIKDMTFTHEGNK--TF-TD-----N-LVNFE-KM  
-----RM---IANTVRTVKFCRS--Q-----SFNPD---  
-A-----ALTNKNH---Q-----DVR S-----YV  
RQLNVIDNQRTL-----SQMSHRL  
-----EPRR-----A-----
```



-----  
---  
>Rapgef4\_[Capsaspora\_owczarzaki\_ATCC\_30864]\_470326013  
-----  
-----  
-----

-----MSANDEESSPLTRRHGGRHHHKP  
TKPATNTTPATGAASAAASNGNGEMSNHSDTTSGGFATTPATATVTTAAATTTTAAAAAA  
ATAGGGAATSGSSTSLTNTVLTAPSSADLAAMSPATRRR-MLNINPSGRPSGKQAIVLLL  
DDAEDEHDNDDDDDDNDGSS--GGEFVA AVLATPTAAPAPAPAPAPAPAPVVAASN  
SY-RDSFDEDEMTNRRASQPRTAAQQHPPPPAGTVPF TLTPKVQTPTLIVELEASPAQ  
--RRRDARKLSAPIEVAPEVLT PGDASSLRYSYASASPAHSP-LGSSERIQSHNSDTNI  
PA---RQPIRRSASQGME---EDNRHSTLFGVEA-KALGHHPSVSATVSPLGSTEL-LE  
GKPPKTTAAAF AARFSGTASPDSPIRHNELLALAASMG CNPPKSPAPLSPVNIQFGDNL  
LV-PEVHTRVPRVDAARRKQLGRSVSNPDAIAEAIANAALAAQLADNGRAAGDAPQAQA  
SSSSSSSSSDAAQQHKIVP--SKTKMQAVAAAKMQRRRTNR--SLTNDKRGGLMALLRD  
E-----TSRKQGGISSNGFLTVPGEDGISQASSVSSLSDEEEEEEEFHL SFGGIPEDSQT  
SNSSNDLVGG--NAGVDDDDDDL-IAPSRLGNLGLGGMGLDFSSGMDFAVRS SMDFDT  
TMEF-TSSAGADFA--STSVEDLLATSEEVVESEDLSPLEARERRL---ALLDIPPASRT  
PEQVTE-----LCRLQLQDFPAFAELNGDTPRREL C--AIAKFVRFEESDSI-----  
-----VDVMDEL CETQWYFVH  
QGALDVIIDGE-----I-----VVTTLLEG-EGF  
GQKPL-----VVDGRVRLD--AIVLTRGPDVELLNVP LQHYER-----ISRL--  
-----VE-----  
-----

-----STTEKIVDDAGEVVMILDKRTRT-APL-----QF  
GL-----PSQR-----N-----VS-VLVTQATLEKL  
IERLYLAD-----LQALDEFYH-----Q---D-  
FLLSHRT--FT-----SSENLLGAMI-----DRL-----RLPGA-----  
-----AFVPKAPKGAAAPIT-----SPEQLRSPAHVIGDILL  
WMADYPKDFCRP-----SMWD-----LLAQ-----AQ-KLLTALEPKLAE-VRELATAV  
LAL-RPAESGAPPT--SGT--APLTREPSLGL-----  
---HAVHANLAPL---GFALGP---DPRRRASSAASSIIVPKSANAQP-----  
----HTPPSG-----L--QSARFKRFFGRGNSSEER-----AGSAAASP  
A-APSTAT-AS-----PAGAAKET-----  
-----

-----NG-----  
-----VPAAK-----  
-----TVRTQRH-RLL-----DEDSDFEVIR-----  
VYRGDQTFRYVAVYPHTTAAEVVS-----ELLESFSI-----Q--LKSASDRTEYVL  
VMAVAA-----LGSAPG--RVSRLSPAADHLAQTL SIHSRYYL  
NNAN---LAERLLP--PEPIAVEG-----  
ES-LILAMDPIELARQITLEDSE LFRSISPSEYVD-----YLFKLDNNK---CENLH  
KFIER-----FNLINFWV----VTQIVSTRDLRKR-----AMVIRFLV LMAKCF  
-----KEWNNFNLSLFALVS-GFANS AVTRLHNTHS-----  
-----KLSKRTVAAMQG-FEALM-----NPTRNM---  
-GAYRSMLLQ-VPE-----G-TPLV-PFFP-----  
LLMKDLVFIHEGNP--SK-----F-----NGLINFD-KR  
-----RL--IGRTL RNVKRMAEVGYL-DANFKFELDE-AKELDAFGSEQDDAKILRD  
TVKRSLVASKTANVNTLSIGSAGAAMR----QLFEKTRTKFF-----VQEYLGE-LV  
KHVDL--DQNRL-----SVRSAEL  
EHRP-----







[illegible]

[illegible]

```
-----PISE-----  
-----SPSPAMNRM-----GRALR-TLLLADS  
SS-C-----LKDRKVA-----G-K-L-----IRKC-AP  
GT-----ELVDWLLNLS-----  
---PIVH-----TRAQAAGMW---QALLEEGVLS-----  
-----H-----VNK-EQPFKDKC-FLYRFRVD  
E-----D---S-----  
-----ATSSYST  
SEDI--NTANEHI-----RESISALLQRGPDAT-----LRMILRKPSHER  
PEELE----LIFEELLHITALSHLS-TSIKRELS-SIIVFESHAQAGTIL-----  
-----FNQGDEG--RSWYILL  
KGSVDVVIHGK---GT-----VATLKNG-DDF  
GKLAL-----INDAPRA--ATIVLKENNCHLLRVDKEHFNR-----ILRD--  
-----V-----  
  
-----EANTLRLQEHGKDVLVLER----VAK-----  
-----QRGQ---HS-----AFK-----YTVMMSGTPSKI  
LEHLLLET-----RL---G---N-----QVSS-----LDPFLD---D-  
FLLTNMV--FM-----PVIQLVDELA-----N-----  
-----YF---HCDV-----N---DA---AQTPEDREYIIINFKKRVIQFMHK  
WVLVARHTALDE-PCVCDFIE---EMALE--VEAN-----PELSEET  
SNI-----  
-----HNL-----LTQKARYQE-DRKQNSAQK-----  
---WKLP--NGQPVC-----LFSGNTT---  
---SSRN---T-----  
  
-----MHPDDD--II-----FR-----  
VYCADHTYCTLRFPPLHTTAEIKA-----CAA EK-----LQLNRGAEDLV  
VEVKS-----GERAV-----FKDNDVSIPTGLSLNGRLFVT  
VKDH--V-DAVT-PLPEQ-----EGP-----TEGID  
I--DLEILSTKDLAFYITIYWDLFWVVHEYELLY-----RTFGRHHF--GKITANLD  
VFLRR-----FNELQYWI----VTDIVSASSMSKR-----VGLLRKFIKLAAY  
-----CKEYNLNNAFFAIVM-GLSNMAVSRLTQTWD-----  
-----KIPSKFRKLFQE-FEALI-----DPSR NH-----  
-RAYRV---YVGK-----LQPPLI-PFMP-----  
LLLKDMTF AHEGNK--TS-LD-----G-LVNFE-KM  
-----HM--MAQTMRTMYCRS--R-----TISL-----DPP--  
-----SPKSE-----G-----DARS-----YI  
CCLRAIDNQ RVL-----TAMSQKL  
-----EPTR-----KV-----
```





```
>Rapgef4_[Chaetura_pelagica]_701389426
-----MGTA-----FG-----ESILDNTPR-----
-----HATIVTREYS-----
-----ELL-----
-----RIEQKD-----FKALW--EKYRQYMSG-L
LTPPYG--VMETGS--N-N-----DRMPDKD-----
-----SMS-----SSALCQV-----
-----SK-NCNK-----VPS-----
-----EKIL-----RA-----GKILR-NTILSRA
PH-M-----IRDRKYH-----L-KTY-----RQC-CV
GT-----ELVDWMMQQS-----
---PCVH-----SRTQAVGMW--QVLLEEGVLN-----
-----H-----VDQ-EHHFQDKY-LFYRFLDD
-----ERED---AP-L-----
-----PT
EEEE--KECDEEL-----QDTMLLLSQIGPDAH-----MRMLLRKLPQGRT
VDDLE-----IIYEELLHIKALSHLS-TTVKRELA-GVLIFESHPKAGTVL-----
-----FNQGEEG--TSWYIIL
KGSVNVVIYGK----GV-----VCTLHEG-DDF
GKLAL-----VNDAPRA--ASIVLREDNCHFRLVDKEDFNR-----ILRD--
-----V-----
-----EANTVRLKEHDQDVLVLEK----IPA-GSRVSNQG
NS---QP-QH-----K-YTVMMSGTPEKI
LEHFLET-----MRPET-TLN-----EA-----TDSVLN---D-
FIMMHCV--FM-----PNSQLCPALM-----A-----
-----H-----Y-----HAQPSQ--GTEQEKMDYALNNKRRVIRLVLQ
WAALYGDLLQED-EAAMAFLE---EFYVS--VSDDT--RMIAALK--EQ-LPELEKIV
KQV--SEE--PK-----APQKK-----
---HKV-----LLQLFNTSD-DRTQ-KRQ-----
-----
-----
-----
-----
-----PIRGSDE--VL-----FK-----
VYCIDQTYTTIRVPVASSVKEVIS-----AVADK-----LSSG-EG--LII
VKMSSG-----GEKVV-----LKPHDVSVFTTLSVNGRLFAC
PRDQ--F-DSLA-PLPEQ-----EGP-----STGTV
GT--FELMSSKDLAHOMTIYDWELFNCVHELELIY-----HTFGRHNF-KK-TTANLD
```





[illegible]

```

EEEE--KECDEEL-----QDTMLLLSQMGPDAA-----MRMILRKPPGQRT
VDDLE-----IIYEELLHIKALSHLS-TTVKRELA-GVLIFESHAKGGTVL-----
-----FNQGEEG--TSWYIIL
KGSVNVVIYGK-----GV-----VCTLHEG-DDF
GKLAL-----VNDAPRA--ASIVLREDNCHFRLRVDKEDFNR-----ILRD--
-----V-----
-----
-----EANTVRLKEHDQDVLVLEK-----VPA-GNRASNQG
NS---QP-QQ-----K-YTVMSTGTPKEI
LEHFLET-----IRLEP-ALN-----EA-----TDSVLN---D-
FIMMHCV--FM-----PNTQLCPALV-----A-----
-----H-----Y-----HAQPSQ--GTEQEKL DYALNNKRRVIRLVLQ
WASTYGDLLQED-DVAMAFLE---EFYVS--VSDDA--RMIAALK---EQ-LPELEKIV
KQI---SED--AK-----APQKK-----
---HKV-----LLQQFNTSD-ERAQ-KRQ-----
-----
-----
-----PIRGSDE--VL-----FK-----
VYCMDHTYTTIRVPVAASVKEVIS-----AVADK-----LGSG-EG--LII
VKMSSG-----GEKVV-----LKPNDVSVFTTLTINGRLFAC
PREQ---F-DSLT-PLPEQ-----EGP-----TVGTV
GT--FELMSSKDLAYQMTLYDWELFNCVHELELIY-----HTFGRHNF-KK-TTANLD
LFLRR-----FNEIQFWV-----VTEICLCSQLSKR-----VQLLKKFIKIAAH-
-----CKEYKNLNSFFAIVM-GLSNVAVSRLALTWE-----
-----KLPSKFKKFYAE-FESLM-----DPSRNH--
-RAYRL---TAAK---LEPPLI-PFMP-----
LLIKDMFTTHEGNK--TF-ID-----N-LVNFE-KM
-----RM---IANTARTVRYRS--Q-----PFSPD--
-A-----AQANKNH--Q-----DVRs-----YV
RQLNVIDNQRTL-----SQMSHRL
-----EPRR-----P-----

```

-----VKRELA-GVLIFESHPKAGTVL-----  
-----FNQGEEG--TSWYIIL  
KGSVNVVIYGK----GV-----VCTLHEG-DDF  
GKLAL-----VNDAPRA--ASIVLREDNCHFRLRVDKEDFNR-----ILRD--  
-----V-----  
-----EANTVRLKEHDQDVLVLEK-----IPA-GNRISNQG  
NS----QP-QH-----K-YIVMSGTPEKI  
LEHFLET-----MRLEA-TLN-----EA-----TDSVLN---D-  
FIMMHCV--FM-----PNSQLCPALM-----A-----  
-----H-----Y-----HAQPSQ---GTEQEKMDYALNNKRRVIRLVLQ  
WAALYGDLLQED-EAAMAFLE---EFYVS--VSDDT--RMIAALK---EQ-LPELEKIV  
KQV---SEE--PK-----APQKK-----  
---HKV-----LLQLFNTSD-DRAQ-KRQ-----  
-----PIRGSDE--VL-----FK-----  
VYCIDQTYTTIRVPVSSSVKEVIS-----AVADK-----LGSG-EG--LII  
VKMSSG-----GEKVV-----LKPHDVSFVFTTSLSVNGRLFAC  
PRDQ--F-DSLA-PLPEQ-----EGP-----STGTV  
GT--FELMSSKDLAQMTIYDWELFNCVHELELIY-----HTFGRHNF-KK-TTANLD  
LFLRR-----FNEIQFWV-----VTEICLCSQLSKR-----VQLLKKYIKIAAH  
-----CKEYKNLNSFFAIIM-GLSNVAVSRLSLTWE-----  
-----KLPSKFKKIYAE-FESLM-----DPSRNLH---  
-RAYRL---TVAK-----LEPPII-PFMP-----  
LLIKDMFTFTHEGNK--TF-AD-----N-LVNFE-KM  
-----RM---IANTVRTVKFCRS--Q-----SFNPD--  
-A-----ALTNKNH---Q-----DVRN---YV  
RQLNVIDNQRTL-----SQMSHRL  
-----EPRR-----A-----

-----  
---  
>Rapgef4\_[Chrysochloris\_asiatica]\_586472254  
-----  
-----  
-----  
-----  
-----MAG-L  
LAPPYG--VMETGS--N-N-----DRIPDKE-----  
-----N-----  
-----VPS-----  
-----EKIL-----RA-----GKILR-NAILSRA  
PH-M-----IRDRKYH-----L-KTY-----RQC-CV  
GT-----ELVDWMTQQT-----  
---QCVH-----SRTQAVGMW---QVLLEDGVLN-----  
-----H-----VDQ-EHHFQDKY-LFYRFLDD  
-----EQED---AP-L-----  
-----PS  
EEEE--KECDEEL-----QDTMLLSQMGPDH-----MRMILRKPPGQRT  
ADELE-----IIYEELLHIKALSHLS-TTVKRELA-GVLIFESHAKGGTVL-----  
-----FNQGEEG--TSWYIIL  
KGSVNVVIYK-----GV-----VCTLHEG-DDF  
GKLAL-----VNDAPRA---ASIVLREDNCHFLRVDKEDFNR-----ILRD--  
-----V-----  
-----  
-----  
-----EANTVRLKEHDQDVLVLEK-----VPA-GNRTSNQG  
NS----QP-QQ-----K-YTVMSGTPEKI  
LEHFLET-----IRLEP-ALN-----EA-----TDSVLN---D-  
FVMMHCV--FM-----PNTQLCPGLV---A-----  
-----H-----Y-----HAQPSQ---GSEQEKMDYAVNNKRRVIRLVLQ  
WAAMYGDLLQDD-GVAMAFLE---EFYVS--VSDDA--RMIASLK---EQ-LPDLEKIV  
KEI---LED--AK-----APQKK-----  
---HKV-----LLQQFNTGD-ERAQ-KRL-----  
-----  
-----  
-----  
-----  
-----PIRGSDE--VL-----FK-----  
VYCV DHTYTTIRVPVAASVKEVVS-----AVADK-----LGSG-EG--LTL  
VKMSSG-----GEKV-----LKPNDVSVFTTLTINGRLFAC  
PREQ---F-DSLT-PLPEQ-----EGP-----TVGTV  
GT--FELMSSKDLAYQMTIYDWELFNCVHELELIY-----HTFGRHHF-KK-TTANLD  
LFLRR-----FNEIQFWV-----VTEICLCSQLSKR-----VQLLKKFIKIAAH-  
-----CKEYKNLNSFFAIVM-GLSNVAVSRLALTWE-----  
-----KLPSKFKKFYAE-FESSM-----DPSRNH---  
-RAYRL---TVAK-----LEPPLI-PFMP-----  
LLIKDMFTTHEGNK--TF-ID-----N-LVNFE-KM  
-----RM---IANTARTVRYCRS--Q-----PFNPD--  
-A-----AQANKNH---Q-----DVR-----YV  
RQLNVIDNQRTL-----SQMSHRV  
-----EPRR-----P-----

```
>Rapgef4_[Cimex_lectularius]_939265221
-----MA-----ATEWITAF-----
-----DKRPSE-----RTCRDVDLICGRLLRRIDSLARIPQSL
NNLAHLAF--YEDLE--KGVTLFRQGEIGTSWYVILTGSVEVKVNQ---E
K-----VSLCTLSVGSSFGESVLQDS-PRETTVV-TKTSCCELLRLSQ
HDLKALAE-----KNKD--VMTELI-----S-NCKMKNGLG
GVG-K-TPQ-----SP-----PPVVQQG-----K-RTLSPDQ
TNPAE-----
-----PITE-----
-----VPSVVMTRA-----AWVLR-TLLLNEA
ES-I-----LRERKTAG-----G-R-L-----VVPCCAS
GS-----ELVTWLVSLA-----
---PDI-----DRHQGTTMW--QALLEEGLIY-----
H-----VTG-EHPFKDKC-VLYQFRQD
R-----D---IT-----
-----CIPRPP
PQDI--AEAEHL-----HEAIADLSDRGPD
AW-----LRMILRKPSNDRTPEDLE-----IIYEELLHMKPLSHLS-NSMKRELA-SVIMFEAHPRSGSIV-----
FEQGEEG--RSWYLV
LNGSVDVVIHGK-----GV-----VATLHQG-EDF
GKLAL-----INDVPRA--ASIIVREDGTHLLRVDKEDFNR-----ILRD-----V-----
-----
-----EANTVRLKEHGKDV
LVLE-----K-----SSSP--NS-----QYK-----YVVMACTAMRM
VEHLLDS-----RLDT-N-----TAAH-----DPALD---D-
FLLTHVL--FI-----STRHLVQELR-----K-----
HY-----TM---DTPLHDKEQSDGHKRVILFVYR
WVTTIRHPVLAD-SNAVAFIE---ELASD--CEHEG-----W-----EES
GLM-----
---HRV-----TAQITRHRE--SSTVVNR-----
---WKLPP--SGQPIC-----LFSPSET---
---GG-T--L-----
-----
-----
-----
-----
-----IKSHDD--II-----FR-----
VYCADHTYCTLRMQVSATAEQIKV-----AAADK-----LGIRHRPEDLLL
AEVKS-----GERIT-----FRDSEVSIPTALTNGKIFVA
PKEH--L-DALT-IIPEQ-----EIP-----TEGLE
L--DLEDVSAKEMAYH
LTMFDWELFWNIHEYELLY-----HTFGRHRF--GONTANL
```







```

FE--QTATTEPE--NKRL-----TRANN-----Q--LIAGTIDKI
LRHILDARL--SIYDDQL-----PNLVSRLKLYRLCPFPQVEI-----DIVVE---E-
FILTLTM--FT-----TNSDVFNLLF-----AYLS-----QD-----
-----RSNGA-----GKADQLTSTQNNENPEVYQDCFSRRVLILLYL
WCMCIGLLAFASLDGLRKFLSDIK-QLISC-RTNCDLEKKAVEVLLKECDQIWNPTHHDA
RST---TEHDSLKKNNRSRK---KPSQKCGVLSGTRAL-----FTRGKQIVKSLP--C---
-----ALQQLSHYT-HHVQ--RSMYYT-----
-----PYH-----L-----
-----NR-----

```

```
>Rapgef4 [Clupea harengus] 831318321
```

[illegible]

```

-----SMS-----SNALCQV-----VPS-----
-----SK-NCNK-----
-----EKIL-----RA-----GKILR-NTILSRA
PH-M-----IRDRKYH-----L-KTY-----RQC-CV
GT-----ELVDWMTQQS-----
---PCVH-----SRTQAVGMW---QVLLEEGVLN-----
-----H-----VDQ-EHHFQDKY-LFYRFLDD
-----ERED---AP-L-----
-----PT
EEEEK--KECDEEL-----QDTMILLSQIGPDAH-----MRMILRKPPGQRT
VDDLE----FIYEELLHIKALSHLS-TTVKRELA-GVLIFESHKAGTVL-----
-----FNQGEEG--TSWYIIL
KGSVNVVIYGK----GV-----VCTLHEG-DDF
GKLAL-----VNDAPRA--ASIVLREDNCHFRLVDKEDFNR-----ILRD--
-----V-----
-----
-----
-----EANTVRLKEHDQDVLVLEK-----IPA-GNRVSNQG
NS---QP-QH-----K-YIVMSGTPEKI
LEHFLET-----MRLEA-TLN-----EA-----TDSILN---D-
FIMMHCV--FM-----PNSQLCPALM-----A-----
-----H-----Y-----HAQPSQ--GTEQEKMDYALNNKRRVIWLVLQ
WAALYGDLLQED-EAAMAFLE---EFYVS--VSDDT--RMITALK--EQ-LPELEKIV
KQV--SEE--AK-----GPQKK-----
---HKV-----LLQLFNTSD-DRAQ-KRQ-----
-----
-----
-----
-----
-----PIRGSDE--VL-----FK-----
VYCIDQTYTTIRVPVSSSVKEVIS-----AVADK-----LGSG-ES--LII
VKMSSG-----GEKVV-----LKPHDVSVFTTLSVNGRLFAC
PRDQ---F-DSLA-PLPEQ-----EGP-----SAGTV
GT--FELMSSKDLAQMTIYDWELFNCVHELELIY-----HTFGRHNF-KK-TTANLD
LFLRR-----FNEIQFWV-----VTEICLCSQLSKR-----VQLLKKYIKIAAH-
-----CKEYKNLNSFFAIIM-GLSNVAVSRLSLTWE-----
-----KLPSKFKKIYAE-FESLM-----DPSRNH--
-RAYRL---TVAK-----LDPPII-PFMP-----
LLIKDMFTTHEGNK--TF-TD-----N-LVNFE-KM
---RM---IANTVRTVKFCRS--Q-----SFNPD--
-A-----ALTNKNH--Q-----DVRs-----YV
RQLNVIDNQRTL-----SQMSHRL
-----EPRR-----A-----

```

-----  
---  
>Rapgef4\_[Colobus\_angolensis\_palliatus]\_795183836  
-----M-----  
-----  
-----  
-----LY---KKYRQYMAG-L  
LAPPYG--VMETGS--N-N-----DRIPDKE-----  
-----N-----T-----  
-----PLIEPHVPLRPAN-TITK-----VPS-----  
-----EKIL-----RA-----GKILR-NAILSRA  
PH-M-----IRDRKYH-----L-KTY-----RQC-CV  
GT-----ELVDWMMQQT-----  
---PCVH-----SRTQAVGMW---QVLLEDGVLN-----  
-----H-----VDQ-EHHFQDKY-LFYRFLDD  
-----EHED---AP-L-----  
-----PT  
EEEE--KECDEEL-----QDTMLLLSQMGPDH-----MRMILRKPPGQRT  
VDDLE-----IIYEELLHIKALSHLS-TTVKRELA-GVLIFESHAKGGTVL-----  
-----FNQGEEG--TSWYIIL  
KGSVNVVIYGK-----GV-----VCTLHEG-DDF  
GKLAL-----VNDAPRA---ASIVLREDNCHFLRVDKEDFNR-----ILRD--  
-----V-----  
-----  
-----EANTVRLKEHDQDVLVLEK-----VPA-GNRASNQG  
NS----QP-QQ-----K-YTVMSGTPEKI  
LEHFLET-----IRLEA-TLN-----EA-----TDSVLN---D-  
FIMMHCV--FM-----PNTQLCPALV---A-----  
-----H-----Y-----HAQPSQ---GTEQEKMDYALNNKRRVIRLVLQ  
WAAMYGDLLQED-DVSMFLE---EFYVS--VSDDA--RMIAALK---EQ-LPELEKIV  
KQI---SED--AK-----APQKK-----  
---HKV-----LLQQFNTGD-ERAQ-KRQ-----  
-----  
-----  
-----  
-----  
-----PIRGSDE--VL-----FK-----  
VYCMDHTYTTIRVPVAASVKEVIS-----AVADK-----LGSG-EG--LII  
VKMSSG-----GEKV-----LKPNDVSVFTTLTINGRLFAC  
PREQ---F-DSLT-PLPEQ-----EGP-----TIGTV  
GT--FELMSSKDLAYQMTIYDWELFNCMHELELIY-----HTFGRHNF-KK-TTANLD  
LFLRR-----FNEIQFWV-----VTEICLCSQLSKR-----VQLLKKFIKIAAH-  
-----CKEYKNLNSFFAIVM-GLSNVAVSRLALTWE-----  
-----KLPSKFKKFYAE-FESLM-----DPSRNH---  
-RAYRL---TVAK-----LEPPLI-PFMP-----  
LLIKDMFTTHEGNK--TF-ID-----N-LVNFE-KM  
-----RM---IANTARTVRYRS--Q-----PFNPD--  
-A-----AQANKNH---Q-----DVR-----YV  
RQLNVIDNQRTL-----SQMSHRL  
-----EPRR-----P-----









[illegible]

[illegible]

```
-----SMS-----SGALCQVSKNCNKT-----  
-----PLIDSHIPHRPSK-TITQ-----VPS-----  
-----EKIL-----RA-----GKILR-NTILSRA  
PH-M-----IRDRKYH-----L-KTY-----RQC-CV  
GT-----ELVDWMMQQS-----  
---TCVH-----SRSQAVGMW---QVLLEEGVLN-----  
-----H-----VDQ-EHHFQDKY-LFYRFLDD  
-----ERED---AP-L-----  
-----PT  
EEEE--KECDEEL----QDTMLLLSQIGPDAH-----MRMILRKPPPGQRS  
MIDDLE----IIYEELLHIKALSHLS-TTVKRELA-GVLIFESHPKAGTVL-----  
-----FNQGEEG--TSWYIIL  
KGSVNVIYGK---GV-----VCTLHEG-DDF  
GKLAL-----VNDAPRA--ASIVLREDNCHFRLRVKDKNR-----ILRD--  
-----V-----  
  
-----EANTVRLKEHDQDVLVLEK----IPA-GNRVSNQG  
SS---QP-QH-----K-YIVMSGTPEKI  
LEHFLET-----MRLEA-TLN-----EA---TDSALN---D-  
FIMMHCV--FM-----PNSQLCPALM-----A-----  
-----H-----Y-----HAQPSQ---GTEQEKM DYALNNKRRVIRLVLO  
WAALYGDLLQED-EAAMAFLE---EFYVS--VSDDT--RMIAALK---EQ-LPELEKIV  
KQV---AE--PK-----GPQKK-----  
---HKV-----LLQLFNTSD-DRAQ-KRQ-----  
  
  
-----PIRGSD--VL-----FK-----  
VYCIDQTYTTIRVPVSSSVKEVIS-----AVADK-----LGSG-EG--LI I  
VKMSSG-----GEKV-----LKPHDVSVFTTL SVNGRLFAC  
PRDQ--F-DSL A-PLPEQ-----EGP-----SAGTV  
GT--FEL MSSKD LAHQMTI YDWEL FNCVHELELIY-----HTFGRHNF-KK-TTANLD  
LFLRR-----FNEIQFWV----VTEIC LCSQLSKR-----VQILKKYIKIAAH  
-----CKEYKNLNSFFAIIM-GLSNVA VSRLSLTWE-----  
-----KLPSKFKKIYAE-FESLM-----DPSRNH---  
-RAYRL---TVAK-----LDPPII-PFMP-----  
LLIKDMTF THEGNK--TL-TD-----N-LVNFE-KM  
-----RM---IANTVRTVKFCRS--Q-----SFNP D--  
-A-----ALANKNH---Q-----DVR S---YV  
RQLNV IDNQRTL-----SQMSHRL  
-----EPRR-----A-----
```

-----  
---  
>Rapgef4\_[Crassostrea\_gigas]\_762156185  
-----MMVSE-----  
---WIAS---LDK-----RPCD----RTGEELDLIYSHLKNLKAFEKFHPSLL  
QQICVYGY--YEDLD--KGVTLFRQGDIGTNWYIVLTGSLEVLVSE-TGDHKDA-----  
-----IIVSTLAPGTCFGESILTNNK-PRYGTVT-TREFTTELIRVEQKDFKILWEGS---  
--KK--LLEGVIT---PLERLST-TA-----  
-----  
-----NQLQY-----  
-----SPAISRQ-GQGRRKSSA---VARLNGQSNPAAP-----IT-----  
---SIPSEKLLK-----RA-----GRVLR-TVLLTRA  
PH-M-----VRDRKYH-----L-RTY-----RKC-MV  
GT-----EMVEWLLQQS-----  
---PIVH-----SRNQAVGIW---QALCEEGIIV-----  
-----H-----VCR-EHQFKDKY-LFYRFCED  
-----DQGV---GT-V-----  
-----PN  
HAQK--KECEEEL-----QDTLITLAQIGPDAM-----MRMILRKLPDRT  
LDDLE-----IIYEELLHIKALSHLS-TSVKRELA-SVLVFESHAKAGTVL-----  
-----FNQGDEG--KSWYIIL  
KGSVNVVIYK---GA-----VCTLHEG-DDF  
GKLAL-----LNDAPRA---ATIVLREDNCHFLRVDKEDFNR-----ILRD--  
-----V-----  
-----  
-----EANTVRLKEHGQDVLVLEK-----IPT-KSQA-ADG  
TM---QS-HY-----K-YSV MAGTPEKM  
LEHLLLETRLNDNTKSEETT-----DSFLE---D-  
FLLTHVI--FM-----PTEKLC PALL---S-----  
-----YYDAKSLKTDEQDAG--DY-----G-----LTQKKSVVQFVQE  
WHNLAEDIFNED-EQVQVFLQ---ELHSY--VDEDC--ASFPCA---SE-LTVLEGMM  
SCE-KGFQFINTP-----EV-----  
---GKRRISPSVMLTKKMANELYLDSIN-KKQPIKANDENIV-----  
-----  
-----  
-----  
-----  
-----K-----  
IYCADHTYSTLR LPMSSSVHSLIE-----HAREK-----LGLGSEE--LVL  
CEIKSS-----GDRVL-----YKEDDL CVTTGLSLNGLLFIS  
PRKH---L-DALV-SESTQ-----NQC-----LPASL  
SH--LIAVQNSDCKLPREI---DLFYDSCQYELIY-----QVLGRSNF-NK-ITANLD  
LFLRR-----FNEVQYWV-----VTE MVLAQN VGKR-----VQLLRKF I KVA AH-  
-----CKEFQNLHSFFAIVM-GLSNI AVSRLSQTWE-----  
-----KLPGKFKKMFAD-FETLM-----DPSRNH---  
-RVYRL---SVSK-----LTPPII-PFMP-----  
LLMKDLTFTHDGNK--TY-FD-----G-LVNFE-KM  
-----HM---IAQTIRNVRICRS--R-----RLDLEP-  
-P-----NT-AKSS---T-----EVQD-----YI  
RNLQVIDNQ RVL-----TQLSYKL  
-----EPRR-----T-----



[illegible]





S-----I-----K-YTVISGTPEKI  
LDHFLET-----MRVDI-HHS-----EP-----DPAVD---D-  
FVLMHCV--FM-----ANSQFCPLLM-----A-----  
-----H-----Y-----HAVSPP--GSEQERLEYALNNKRRALILALR  
WANTHSYLLQEE-PAALSFLE---ELYGS--LSNDS--RVLRLAK---DF-VPDLEKIV  
QLH---SEE--AK-----ATKKK-----  
-----T-----LIRQFSNGE-ERLQ-KKQ-----  
-----  
-----  
-----  
-----  
-----  
-----PIRNQDD--IL-----LK-----  
VYCSDHITYTTIRIABAATGREVIN-----SVADK-----LGTS-DE--LML  
IHLSSA-----GEKQM-----LKPNDVSVFSSLNINGRFLFAC  
SRDQ--L-NSLS-PLPDQ-----EGP-----SAGSM  
ST--FELMSSKDLAYQMTMFDWELFSCVHEHELLY-----HTFGRQSF-RR-TTANLD  
LFLRR-----FNQVQLWV-----VTEVCLCGQLSKR-----VQLLKKFIKIAAH  
-----CREFKNLNSFFAIIM-GMSNPAVSRLSQTWE-----  
-----KLPTKFKKFYAE-FESMM-----DPSRNH--  
-RSYRL---TVTK---LEPPII-PFTP-----  
LLLKDMFTTHEGNK--TF-ID-----N-MVNFE-KM  
---RM---IANTIRQVRHCRG--Q-----PFNPD--  
-I-----CQPNKNQ--A-----EVRG-----YV  
RKLCVIDNQRAL-----TQLSYRL  
-----EPRR-----T-----

-----MAG-L  
LVPPYG--VME--S--S-GS-----DRMPEKE-----  
-----NIS-----NSSFVSMSSHPNKK-----  
-----SFHESP--AKLQ-NKSPS-----QVPS-----  
-----EKIL-----RA-----GKVLIR-NAILSRA  
PH-M-----IRDRKYH-----L-KTY-----RQC-CV  
GT-----ELVDWQMLQS-----  
---SCVH-----SRLQAVGMW--QVLLEEGVLN-----  
-----H-----VDG-ETSFQDKY-LFYRFLDD  
-----EQED--AL-I-----  
-----PS

[illegible]

```

-----NLS-----NSSPGLSPKHLNKK-----
-----SFIENTPIKVHP-K-PINQ-----VPS-----
-----EKIL-----RA-----GKVLRL-NIILSRA
PH-M-----IRDRKYH-----L-KTY-----RRS-CI
GT-----ELVDWLLQHT-----
---SCVH-----SRVQAVGMW---QVLLEEGVLN-----
-----H-----VDQ-EPTFQDKY-LFYRFLDD
-----ESED---SG-M-----
-----PS
EEDK--KESDEEL----QDTLLLLLSQIGPDAH-----LRMILRKQPGQRT
VDDLE----IIYEELLHIKALSHLS-TTVKRELA-GVLIFESHAKAGTVL-----
-----FNQGEEG--TSWYIIL
KGSVNVVIYGK----GV-----VCTLHEG-DDF
GKLAL-----VNDAPRA--ASIVLREDFCHFRLVDKEDFNR-----ILRD--
-----V-----
-----
-----EANTVRLKEHEEDVLVLEK-----A--N---NRS
SS---SS-PL-----K-YTVMSTGTPPEKI
LEHLLLET-----MKLDC-QFS-----ES-----DPALD---D-
FLLMHCV--FV-----PNSQLCPLLM-----T-----
-----H-----Y-----HAQASQ--GSEQERMDYTLNNKRRVVRVLVQ
WASINTDHLQEE-DSSFSFIQ---EFYEM--VCEDS--RLTPALK--DH-LPELEKII
KQN---SDD--GR-----PSQKK-----
---HKV-----LLRQFSTGN-DRLQ-KRQ-----
-----
-----
-----
-----
-----PIKSTDE--IL-----FK-----
VYCSDHITYSTIRVPSASVREVIA-----AVSDK-----LSSG-DD--LLL
IHLNSA-----GDKEL-----LKPSDVSIFSSLSINGRLFVC
PRDQ---I-DSLT-PLPEQ-----EGP-----SAGSM
ST--FELMSSKDLAQMTLYDWELFHCVHEHELIY-----HTFGRHHF-KK-TTANLD
LFLRR-----FNEVQLWV-----VTEVCLCPALSKR-----VQLLKKFIKIAAH-
-----CKEFKNLNSFFAIIM-GLGNPAVCRLSQTWE-----
-----KLPSKFKKFYGE-FENLM-----DPSRNH-
-RAYRL---TMAK-----LEPPII-PFMP-----
LLIKDMFTTHEGNK--TF-TD-----R-LVNFE-KM
---RM---IANTVRIIRYCRS--Q-----PFDQEA-
-P-----QATGKSH--Q-----DVRT---YV
RHISVIDNQRLS-----SQLSHRL
-----EPRR-----T-----

```





```
VFLRR-----FNEIQYWV----ITEILLVTSLNKR-----VQILRKMIKLAAY-  
-----CKEYRNINALFAVLN-GLSNVAVSRLSLTWD-----DPSKNH---  
-----KLPSKSKKTYTE-LEALI-----G-LVNFE-KM  
-RAYRQ---AVSK-----LQSPVI-PFMP-----DPP--  
LLLKDIAFTHDGNK--TV-VD-----HM--FAQTLRTLYCRT--R-----HLVL-----TPKCE---S-----EVKS---YV  
SCLRAMDNQRIL-----TSMSQKL  
-----EPRR-----S-----  
  
-----  
  
>Rapgef4_[Dipodomys_ordii]_852730826  
-----M-----  
  
-----FV-----  
-----FVL-TPL--I-E-----PHVPLRP-----A-----  
-----N-TITK-----VPS-----  
-----EKIL-----RA-----GKILR-NAILSRA  
PH-M-----IRDRKYH-----L-KTY-----RQC-CV  
GT-----ELVDWIMQQT-----SCVH-----SRTQAVGMW--QVLLEDGVLN-----H-----VDQ-EHHFQDKY-LFYRFLDD  
-----EHED--AP-L-----PT  
EEEE--KECEEEL-----QDTMLLLSQMGPDHAH-----MRMILRKPPGQRT  
VDDLE----IIYEELLHIKALSHLS-TTVKRELA-GVLIFESHAKGGTVL-----FNQGEEG--TSWYIIL  
KGSVNVVIYGK-----GV-----VCTLHEG-DDF  
GKLAL-----VNDAPRA--ASIVLREDNCHFLRVDKEDFNR-----ILRD--  
-----V-----  
  
-----EANTVRLKEHDQDVLVLEK-----VPA-GNRASNQG  
NS----QP-QQ-----K-YTVMSTPEKI  
LEHFLET-----IRLEP-ALN-----EA-----TDAILN---D-  
FVMMHCV--FM-----PNTQLCPALV-----A-----H-----Y-----HAQPSQ--GTEQEKM DYALNNKRRVIRLV LQ  
WAATYGDLLQED-DVAMAFLE---EFYVS--VSDDA--RMIAVLK---EQ-LPELEKIV  
KQI---SED-AK-----APQKK---HRV-----LLQQFNTGD-ERSQ-KRQ-----
```



[illegible]



```
TEDI--GAANEHI-----REALSALFQRGPDAT-----LRMILRKPSHERT
SEELE-----LVFEELVHIAALSHLS-TSIKRELS-SIFVFEAHAQAGTIL-----
-----FNQGDEG--RSWYILL
KGSVDVVIHGK----GT-----VATLKTG-DDF
GKLAL-----INDAPRA--ATIVLKENNCHLLRVDKEHFNR-----ILRD--
-----V-
-----
-----EANTLRLQEHEGKDVLVLER-----VAK--
-----QRGQ---HS-----AFK-----YTVMMSGTPAKM
LEHLLET-----RL--G--Q-----SVGG-----MDPFLD---D-
FLLTHIV--FM-----PVVQLVDELA-----N-----
-----YF--HCDA-----H-----EE--AQTPEDREYIINFKKRVILFMQK
WMAVRHAFAFEE-PSVCDFIE---DLAAE--VEAD-----PDLNEET
SIV
---HNV-----LTQMARYQE-DRNQNAGQK-----
---WKLP--NGQPIC-----LFSGNAA---
---PSKT--V-----
-----
-----IRPDD--II-----FR-
VYCADHTYCTLRFPMTTAELIKA-----CAADK-----LQLNRGPEDLVL
VEVKSN-----GERSV-----FKDNDVSIPTGLTLNGRLFVS
VKDH--L-DALT-PLQEQ-----EGP-----TEGVD
I--DLEILSTKELAYHITLFEWDLFWAVHEYELLY-----HTFGRHHF--GKITANLD
VFLRR-----FNEVQYWI----VTCLVSTPSLSKR-----VGLVRKFIKLAAY-
-----CKEYQNNAFFAVVM-GLSNMAVSRLQQTWE-
-----KIPSKFRKIFQE-FEALI-----DPSRNH--
-RAYRV---FVGK-----LQPPLI-PFMP-----
LLLKDMTFAGEGNK--TS-LD-----G-LVNFE-KM
-----HM--MAQTMRITRFCS--R-----SLGL-----EPP-
-----SPKSE---G-----EVRS-----YI
SSFRVIDNQRTL-----TAMSQKV
-----EPTR-----KL-
-----
-----
>Rapgef4_[Drosophila_ficusphila]_1036935367
-----ML-----
-----FRRSCT-----YNV-----
-----EQSTRHYA-----K-----S
A-----VTLCNLGVGATFGESVLHDL-PRDSTVV-TKTTCELLRVEQQDFRLIWE-----
KNKE--LMNDIF-----T-NCKLKNFGGPSV-Q-TA-----AA-TS-----
---PT-----K--RPLSPDHPNPAL
```

```
-----PITE-----  
-----TPSPAMNRM-----GWALR-TLLVADN  
SS-C-----LKDRKVS-----G-K-L-----IRKC-AP  
GT-----ELVDWLVNLS-----  
---PIVH---TRAQAAGMW---QALLEEGVLA-----  
-----H-----VNK-EQPFKDKC-FLYRFRLD  
E-----E---GG-T-----  
-----AAAGVPQ  
AEDL--GAANEHI-----RETLSELFQRGPDAT-----LRMILRKPSHERI  
SEELE----LVFEELVHIAALSHLS-TSIKRELS-AIFVFEAHAQAGTIL-----  
-----FNQGDEG--RSWYILL  
KGSVDVVIHGK---GT-----VATLKTG-DDF  
GKLAL-----INDAPRA--ATIVLKENNCHLLRVDKEHFNR-----ILRD--  
-----V-----  
  
-----EANTLRLQEHEGKDVLVLER----VAK-----  
-----QRGQ---HS-----AFK-----YTVMMSGTPAKM  
LEHLLET-----RL---G---Q---SVGG-----MDPFLLD---D-  
FLLTHIV--FM-----PVVQLVDELA-----N-----  
-----YF---HCDA-----H---ED---AQTPEDREYIIINFKKRVIQFMQK  
WMAVRHAAFEE-PSVCDFIE---DLAAE--VEAD-----PDLNEET  
SIV-----  
---HNV-----LTQMARYQE-DRNQNAGQK-----  
---WKLP--NGQPIC-----LFSGNAT-----  
---PSKT---V-----  
  
-----IRPDDD--II-----FR-----  
VYCADHTYCTLRFPMTTAELIKA-----CAADK-----LQLNRGPEDLVL  
VEVKS-----GERSV-----FKDNDVSIPTGLSLNGRLFVS  
VKDH--L-DALT-QLQE-----ECP-----TEGVD  
I--DLEILSTKELAYHITLFEWDLFWAVHEYELLY-----HTFGRHHF--GKITANLD  
VFLRR-----FNEVQYWI----VTCLVSTPSLSKR-----VGLVRKFILKLAAY  
-----CKEYQNLNAFFAVVM-GLSNMAVSRLQQTWE-----  
-----KIPSKFRKIFQE-FEALI-----DPSRNH-----  
-RAYRV---FVGK---LQPPLI-PFMP-----  
LLLKDMTFAGEGNK--TS-LD-----G-LVNFE-KM  
-----HM--MAQTMRITIRFCRS--R-----SLGL-----EPP--  
-----SPKSE-----G-----EVRS-----YI  
SSFRVIDNQRVL-----TAMSQKV  
-----EPTR-----KL-----
```

-----  
---  
>Rapgef4\_[Drosophila\_kikkawai]\_1036730951  
-----ML-----  
-----FRRSCT-----YNV-----  
-----EQSTRHYA-----K-----S  
A-----VTLCNLGVGATFGESVLHDL-PRDSTVV-TKTTCELLRVEQQDFRLIWE-----  
KNKE--LMNDIF-----T-NCKFKNGFGPGV-Q-TA-----AAATS-----  
---PT-----K--RPLSPDHPNPAL-----  
-----  
-----PITE-----  
-----TPSPAMSRM-----GWALR-TLLVADN  
SS-C-----LKDRKVS-----G-K-L-----IRKC-AP  
GT-----ELVDWLVNLS-----  
---PIVH-----TRAQAAGMW---QALVEEGVLA-----  
-----H-----VNK-EQPFDKDC-FLYRFRLD  
E-----E---GG-A-----  
-----AAAGVPQ  
SDDL--GAANEHI-----REALSALFQRGPDAT-----LRMILRKPSHERT  
SEELE-----LVFEELVHIAALSHLS-TSIKRELS-SIFVFEAHAQAGTIL-----  
-----FNQGDEG--RSWYILL  
KGSVDVVIHGK-----GT-----VATLKTG-DDF  
GKLAL-----INDAPRA---ATIVLKENNCHLLRVDKEHFNR-----ILRD--  
-----V-----  
-----  
-----EANTLRLQEHGKDVLVLER-----VAK-----  
-----QRGQ---HS-----AFK-----YTVMSGTPAKM  
LEHLLLET-----RL---G---Q-----SVGG-----MDPFLLD---D-  
FLLTHIV--FM-----PVVQLVDELA-----N-----  
-----YF---HCDA-----H-----EE---AQTPEDREYIINFKKRVIQFMQK  
WMAVRHAAAFEE-PSVCDFIE---DLAAE--VEAD-----PDLNEET  
SIV-----  
---HNV-----LTQMARYQE-DRNQNAGQK-----  
---WKLPP---NGQPIC-----LFSGNAT---  
---PSKT---V-----  
-----  
-----  
-----IRPDDD--II-----FR-----  
VYCADHTYCTLRFPMTTAEILKA-----CAADK-----LQLNRGPEDLVL  
VEVKS-----GERSV-----FKDNDVSIPTGLSLNGLFVS  
VKDH---L-DALT-QLQEQ-----ECP-----TEGVD  
I--DLEILSTKELAYHITLFEWDLFWAVHEYELLY-----HTFGRHHF--GKITANLD  
VFLRR-----FNEVQYWI-----VTELVSTPSLSKR-----VGLVRKFIKLAAY-  
-----CKEYQNLNAFFAVVM-GLSNMAVTRLQQTWE-----  
-----KIPSKFKKIFQE-FEALI-----DPSRNH---  
-RAYRV---FVGK-----LQPPLI-PFMP-----  
LLLKDMTFAHEGNK--TS-LD-----G-LVNFE-KM  
-----HM--MAQTMRTIRFCRS--R-----SLGL-----EPP--  
-----SPKSE---G-----EVRS-----YI  
SSFRVIDNQRVL-----TAMSQKV  
-----EPTR-----KL-----

```
-----  
-----  
-----  
-----  
-----  
-----  
-----  
-----  
-----  
  
----  
>Rapgef4_[Drosophila_miranda]_1037006446  
-----MSAAQQQRQGRWSAQIVASDEAAWCVLLAYRRHSDSHEHEVLESERTAGA  
PTAGATSAVIKRLRLERGPAPRQSTA----FEM-----  
-----SN-----  
  
KNKE--LMNDIF-----T-NCKLKNGFGPSV-Q-QT-----AAAPS-----  
---PT-----K-RPLSPDHNPAL-----  
  
-----PITE-----  
-----TPSPAMSRM-----GWALR-TLLVADN  
SS-C-----LKD RKVS-----G-K-L-----IRKC-AP  
GT-----ELVDWLVLNLA-----  
---PIVH-----TRAQAAGMW---QALVEEGVLT-----  
-----H-----VNK-EQPFKDKC-FLYRFRLD  
E-----E---GG-A-----  
  
-----PAVGIPQ  
AEDQ--HAANEHI-----REALSALFQRGPDAT-----LRMILRKPSHERT  
SEELE----LVFEELVHIAALSHLS-TSIKRELS-SIFVF EAHAKAGTIL-----  
-----FNQG DEG--RSWIILL  
KGSVDVVIHGK----GT-----VATLKTG-DDF  
GKLAL-----INDAPRA--ATIVLKENNCHLLRV DKEHFNR-----ILRD--  
-----V-----  
  
-----EANTLRLQE H GKDV LVLER-----VAK-----  
-----QRGQ---HS-----AFK-----YTVMMSGTPAKM  
LEHLLET-----RL---G---Q-----SVGG-----MDPF LD---D-  
FLLTHIV--FM-----PVVQLVDELA-----N-----  
-----YF---HCDT-----H---ED---AQ TP EDREYI VNFKKRVI Q FMQK  
WMAVRHAAFEE-PSVCDFIE---DLAAE--VEAD-----PDLNEET  
SIV-----  
---HNV-----LTQMARYQE-DRNQ N AGQK-----  
---WKLP P--NGQPIC-----LFSG NAT---  
---PSKT--V-----  
  
-----  
-----  
-----  
-----  
-----IRPDDD--II-----FR-----  
VYCADHTYCTLRFP M HTTA ELIKA-----CAADK-----LQLNRGPED LCL  
VEVRSN-----GERSV-----FKDN DV SI PTGLSLNGRLFVS  
VKDH---L-DALT-QLQE Q-----ECP-----TEGV D  
I--DLEILSTKELAY HIT LF EW DL FYAVHEYELL Y-----HTFGRHHF--GKITANL
```

[illegible]



-----Q R G Q-----H S-----A F K-----Y T V M S G T P A K M  
LEH L L E T-----R L---G---Q-----S V G G-----M D P F L D---D-  
F L L T H I V---F M-----P V V Q L V D E L A-----N-----  
-----Y F---H C D A-----H-----E D---A Q T P E D R E Y I I N F K K R V I Q F M Q K  
W V M A V R H A A F E E-P S V C D F I E---D L A A E---V E A D-----P D L N E E T  
S I V-----  
---H N V-----L T Q M A R Y Q E-D R N Q N A G Q K-----  
---W K L P P---N G Q P I C-----L F S G N A T---  
---P S K T---V-----

```
>Rapgef4 [Drosophila takahashii] 1036922041
```

[illegible]



```

-----N-----T-----
-----PLIEPHVPLHPAN-SITK-----VPS-----
-----EKIL-----RA-----GKILR-NAILSRA
PH-M-----IRDRKYH-----L-ETY-----RQC-CV
GT-----ELVDWMVQQT-----
---QCVH-----SRTQAVGMW---QVLLEDGVLN-----
-----H-----VDQ-EHHFQDKY-LFYRFLDD
-----ERED---AP-L-----
-----PT
EEEE--TQGDEEL-----QDTVLLLSQLGPDAA-----MRMILRKPPGQRT
MDDLE-----IIYEELLHIKALSHLS-TTVKRELA-GVLIFESHAKGGTVL-----
-----FNQGEEG--TSWYIIL
KGSVNVVIYGK-----GV-----VCTLHEG-DDF
GKLAL-----VNDAPRA--ASIVLREDNCHFLRVDKEDFNR-----ILRD--
-----V-----
-----
-----EANTVRLKEHDQDVLVLEK-----VPA-GNRASNQG
NS---QP-QQ-----K-YTVMSTGTPPEKI
LEHFLET-----IRLEP-ALN-----EA-----TESVLN---D-
FVMMHCV--FM-----PNTQLCPGLV-----A-----
-----H-----Y-----HAQPSQ--GTQQEKMDYALNNKRRVIRLVLO
WAAVHGDLLQED-DVAVAFLE---EFYVS--VSDDA--RMIAALK--EQ-LPELEKIV
KQI--LEE--AK-----APQKK-----
---HKV-----LLQQFNTGD-ERAQ-KRQ-----
-----
-----
-----
-----PIRGSDE--VL-----FK-----
VYCMDHTYTTIRVPVGASVKEVIS-----AVADK-----LGSG-EG--LII
VKMSSG-----GEKV-----LKPNDVSVFTTLTINGRLFAC
PREQ---F-DSLT-PLPEQ-----EGP-----TVGTM
GT--FELMSSKDLAYQMTIYDWELFHCVHELELIY-----HTFGRHNF-KK-TTANLD
LFLRR-----FNEIQFWV-----VTEVCLCSQLSKR-----VQLLKKFIKIAAH-
-----CKEYKNLNAFFAIVM-GLSNVAVSRLALTWE-----
-----KLPSKFKKFYAE-FESLM-----DPSRNH--
-RAYRL---TVAK-----LEAPLI-PFMP-----
LLIKDMTFIHEGNK--TF-ID-----N-LVNFE-KM
---RM---IANTARTVRYCRS--Q-----PFNPD--
-A-----AQANKNH--Q-----DVR-----YV
RQLNVIDNQRTL-----SQMSHRL
-----EPRR-----P-----

```

-----  
---  
>Rapgef4\_[Egretta\_garzetta]\_697837442  
-----MVAA-----HT-----SH-----SSS  
SGEWIA---CLDK-----RPLE-----RSSEVDIIFTRLKEVKAFEKFHPNLL  
QQICLCGY--YENLE--KGITLFRQGDIGTNWYAVLTGSLDVKVSD-TSNHQDA-----  
-----VTICTLGIGTAFGESILDNT-PRHATIV-TREYSELL-----  
-----RIEQKD-----FKALW---EKYRQYMSG-L  
LTPPYG--VMETGS--N-N-----DRIPTKQ-----  
-----N-----T-----  
-----PLIEPHIPHRATK-TITQ-----VPS-----  
-----EKIL-----RA-----GKILR-NTILSRA  
PH-M-----IRDRKYH-----L-KTY-----RQC-CV  
GT-----ELVDWMMQQS-----  
---PCVH-----SRTQAVGMW---QVLLEEGVLN-----  
-----H-----VDQ-EHHFQDKY-LFYRFLDD  
-----ERED---AP-L-----  
-----PT  
EEEE--KECDEEL-----QDTMLLSQIGPDAH-----MRMILRKPPGQRT  
VDDLE-----IIYEELLHIKALSHLS-TTVKRELA-GVLIFESHKAGTVL-----  
-----FNQGEEG--TSWYIIL  
KGSVNVVIYGK----GV-----VCTLHEG-DDF  
GKLAL-----VNDAPRA---ASIVLREDNCHFLRVDKEDFNR-----ILRD--  
-----V-----  
-----  
-----EANTVRLKEHDQDVLVLEK-----IPA-GNRVSNQG  
NS----QP-QH-----K-YIVMSGTPEKI  
LEHFLET-----MRPEA-TLN-----EA-----TDSVLN---D-  
FIMMHCV--FM-----PNSQLCPALM---A-----  
-----H-----Y-----HAQPSQ---GTEQEKM DYALNNKRRVIRLVLQ  
WAALYGDLLQED-EAAMAFLE---EFYVS--VSDDT--RMIAALK---EQ-LPELEKIV  
KQV---SEE--PK-----APQKK-----  
---HKV-----LLQLFNTSD-DRAQ-KRQ-----  
-----  
-----  
-----  
-----  
-----PIRGSDE--VL-----FK-----  
VYCIDQTYTTIRVPVSSSVKEVIS-----AVADK-----LGSG-EG--LII  
VKMSSG-----GEKVV-----LKPHDVSFVTTLSVNGRLFAC  
PRDQ---F-DSLA-PLPEQ-----EGP-----STGTV  
GT--FELMSSKDLAQMTIYDWELFNCVHELELIY-----HTFGRHNF-KK-TTANLD  
LFLRR-----FNEIQFWV-----VTEICLCSQLSKR-----VQLLKYYIKIAAH-  
-----CKEYKNLNSFFAIIM-GLSNVAVSRLSLTWE-----  
-----KLPSKFKKIYAE-FESLM-----DPSRNH---  
-RAYRL---TVAK-----LDPPII-PFMP-----  
LLIKDMFTTHEGNK--TF-TD-----N-LVNFE-KM  
-----RM---IANTVRTVKFCRS--Q-----SFNPD--  
-A-----ALTNKNH---Q-----DVRs-----YV  
RQLNVIDNQRTL-----SHMSHRL  
-----EPRR-----A-----



LFLRR-----FNEIQFVW----VTEICLCSQLSKR-----VQLLKKFIKIAAH-  
 -----CKEYKNLNSFFAIVM-GLSNVAVSRLALTWE-----  
 -----KLPSKFKKFYAE-FESLM-----DPSRHH-----  
 -RAYRL---TVAK-----LEPPLI-PFMP-----  
 LLIKDMFTFHEGKN--TF-ID-----N-LVNFE-KM  
 -----RM--IANTARTVRYCRS--Q-----PFNPD--  
 -A-----AQANKNH---Q-----DVRS----YV  
 RQLNVIDNQRTL-----SQMSHRL  
 -----EPRR-----P-----



[illegible]

[illegible]

[illegible]











SS---QP-QH-----K-YIVMSGTPEKI  
LEHFLET-----MRLEA-TLN-----EA----TDSVLN---D-  
FIMMHCV--FM-----PNSQLCPALM----A-----  
-----H-----Y-----HAQPSQ--GTEQEKM DYALNNKRRVIRLVLQ  
WAALYGDLLQED-EAAMAFLE---EFYVS--VSDDT--RMIAALK--EQ-LPELEKIV  
KQI---SEE-PK-----APQKK-----  
---HKV-----LLQLFN TSD-DRAQ-KRQ-----  
  
-----  
  
-----PIRG SDE--VL-----FK-----  
VYCIDQTYTTIRVPVSSSVKEVIS-----AVADK-----LGSG-EG--LII  
VKMSSG-----GEKV V-----LKPHDVSVFTT LSVNGRLFAC  
PRDQ--F-DSL A-PLPEQ-----EGP-----SAGTV  
GT--FEL MSSKD LAHQMTI YDWEL FNCVHELELIY-----HTFGRHNF-KK-TTANLD  
LFLRR-----FNEIQFWV-----VTEICLCTQLSKR-----VQLLK KYIKIAAH-  
-----CKEYKNL NSFFAI IM-GLSNVA VSRLSLTWE-----  
-----KLPSKF KKIYAE-FESLM-----DPSRNH--  
-RAYRL---TVAK-----LDPPII -PFMP-----  
LLIKDMTF THEGNK--TF-TD-----N-LVNFE-KM  
-----RM---IANTVRT VKFCRS--Q-----SFNP D--  
-A-----ALT NKNH---Q-----DVR S-----YV  
RQLNV IDNQRTL-----SQMSH RL  
-----EPRR-----A-----  
  
-----  
  
---

>Rapgef4\_[Fukomys\_damarensis]\_731272285

-----  
  
-----MAG-L  
LAPPYG--AMETGS--N-N-----DRIPDKE-----  
-----N-----  
-----VPS-----  
-----EKIL-----RA-----GKILR-NAILSRA  
PH-M-----IRDRKYH-----L-KTY-----RQC-CV  
GT-----ELVDWMLQQT-----  
---PCVH-----SRTQAVGMW--QVLLEDGV LN-----  
-----H-----VDQ-EHHFQDKY-LFYRFLDD  
-----EHED---AP-L-----P

```

EEEE--KECDEEL-----QDTMLLSQMGPDAH-----MRMILRKPPGQRT
VDDLE-----IIYEELLHIKALSHLS-TTVKRELA-GVLIFESHAKGGTVL-----
-----FNQGEEG--TSWYIIL
KGSVNVIYGK----GV-----VCTLHEG-DDF
GKLAL-----VNDAPRA---ASIVLREDNCHFRLVDKEDFNR-----ILRD--
-----V-----
-----EANTVRLKEHDQDVLVLEK-----VPA-GNRASNQG
NS---QP-QQ-----K-YTVMMSGTPEK
LEHFLET-----IRLEP-ALN-----EA-----ADSVLN---D-
FVMMHCV--FM-----PNTQLCPALV-----A-----
-----H-----Y-----HAQPSQ--GTEQERLDYALNNKRRVIRLVLO
WAATYGDLLQED-DVSMAFLE---EFYVS--VSDDA--RMIAAFK--EQ-LPELEKIV
KQT---SED-AK-----GPQKK-----
---HKV-----LLQQFNTSD-ERAQ-KRQ-----
-----PIRGSD--VL-----FK-----
VYCMDHTYTTRVPVAASVKEVIS-----AVADK-----LGSG-EG--LII
VKMSSG-----GEKV-----LKPNDVSVFTTLTINGRLFAC
PREQ---F-DSLT-PLPEQ-----DGP-----TVGTV
GT--FELMSSKDLAYQMTIIDWELFNCVHELELIY-----HTFGRHNF-KK-TTANLD
LFLRR-----FNEIQFWV-----VTEICLCSQLSKR-----VQLLKFIKIAAH
-----CKEYKNLNSFFAIVM-GLSNVAVSRLALTWE-----
-----KLPSKFKKFYAE-FESLM-----DPSRNH---
-RAYRL---TAAK-----LEPPLI-PFMP-----
LLIKDMTFTHEGNK--TF-ID-----N-LVNFE-KM
-----RM---IANTARTVRYRS--Q-----PFNPD--
-A-----AQANKNH---Q-----DVR-----YV
RQLNVIDNQRTL-----SQMSHRL
-----EPRR-----P-----
-----
>Rapgef4_[Fundulus_heteroclitus]_831555062
-----MESGS---NN-----DRLTDKD-----

```

-----NMN-----S-----  
-----DSG-----NKAH-----S-----KVPS-----  
-----EKLQ-----RA-----GKVLRL-NAILSRA  
PH-M-----IRDRKYH-----L-KTY-----RQC-CV  
GT-----ELVDWLVMQS-----  
---ACVL-----TRSHAVGMW---QALLEEGVLN-----  
-----H-----VDQ-DLGFHDKY-LFYRFLDD  
-----EEED---TP-L-----  
-----PS  
EEEE--RESEEEEL-----PETILFLAQIGPDAL-----LRMILRKPPGQRT  
ADDLE-----IIYDELLHIKALSHLS-NTVKRELA-SVVIFESHAKAGTVL-----  
-----FNQGEEG--TSWYIIQ  
KGSVNVVIYGK---GV-----VCTLHEG-DDF  
GKLAL-----VTDSPRA--ASIVLREDNCHFLRVDKEDFNR-----ILRD--  
-----V-----  
-----  
-----EANTVRLKEHEQAVLVLEK----S----PRSSTLG  
S-----I-----K-YTVISGTPEKI  
LEHFLET-----MRLDI-HHN-----EP-----DPAVD---D-  
FVLMHCV--FL-----PNSQLCPLLM-----A-----  
-----H-----Y-----HVVSP--GSEQRLEYTLNSKRRALILT  
WANSHTYLLQEE-PAAISFLE---ELYGS--VSNDS--RTLRLGLK---DL-VLDLEKVV  
KLH---SEE--VK-----STKKR-----  
-----T-----LIRQFSNGE-ERLQ-KKQ-----  
-----  
-----PIRNQDD--IL-----LK-----  
VYCSDHYYTTIRITVAATGREVIS-----AVSEK-----LGTT-QE--LVL  
VHLSSA-----GEKQL-----LKPNDVSVFSTLSINGRLFAC  
PREQ--L-SSLA-PLPDQ-----EGP-----SAGSM  
ST--FELMSSKDLAYQMTMFDWELFSCVHEHELLY-----HTFGRHSF-RR-TTANMD  
LFLRR-----FNQVQLWV----VTEVCLCTQLSKR-----VQLLKKFIKIAAH  
-----CREFKNLNSFFAIIM-GMSNPAVSRLSQTWE-----  
-----KLPTKFKKFYAE-FESMM-----DPSRNH---  
-RSYRL---TVTK-----LEPPII-PFMP-----  
LLKDMFTFTHEGNK--TF-ID-----N-MVNFE-KM  
-----RI---IANTIRQVRHCRS--Q-----PFNPD--  
-I-----CQPNKNQ---A-----DVRG-----YV  
RKLCVIDNQRAL-----TQLSYRL  
-----EPRR-----T-----  
-----  
-----  
-----  
-----  
-----  
-----  
-----









```

-----
>Rapgef4_[Gorilla_gorilla_gorilla]_426337729
-----
-----
-----MAG-L
LAPPYG--VMETGS--N-N-----DRIPDKE-----
-----N-----T-----
-----PLIEPHVPLRPAN-TITK-----VPS-----
-----EKIL-----RA-----GKILR-NAILSRA
PH-M-----IRDRKYH-----L-KTY-----RQC-CV
GT-----ELVDWMMQQT-----
---PCVH-----SRTQAVGMW---QVLLEDGVLN-----
-----H-----VDQ-EHHFQDKY-LFYRFLDD
-----EHED---AP-L-----
-----PT
EEEE--KECDEEL-----QDTMLLLSQMGPDAA-----MRMILRKPPGQRT
VDDLE-----IIYEELLHIKALSHLS-TTVKRELA-GVLIFESHAKGGTVL-----
-----FNQGEEG--TSWYIIL
KGSVNVVIYGK-----GV-----VCTLHEG-DDF
GKLAL-----VNDAPRA--ASIVLREDNCHFLRVDKEDFNR-----ILRD--
-----V-----
-----
-----EANTVRLKEHDQDVLVLEK-----VPA-GNRASNQC

```

[illegible]

[illegible]

[illegible]

-----  
---  
>Rapgef4\_[Halyomorpha\_halys]\_939661167  
-----MA-----TTQWILAF-----  
-----DRRPGD-----RSVRDVELICGRLRRLEALSRLPQQVI  
AHLAHHAF--YEDVE--RGVTLFRQGDIGTSWYMILAGKVEVRAIQ-----DK-----S  
M-----VTLCTLGVGGSFGEGVLHDL-PRDSTVI-TRTSCELLRLTHQDLKALAE-----  
KNKE--IMCDLI-----S-NCKMKNGLGGVV-K-S-Q-----SP-----  
-SPPLPQA-----K--RGLSPDESDPAR-----  
-----  
-----PITE-----  
-----MPSMEMARA-----GWVLR-TLLLNEQ  
DN-V-----LRERKTAG-----G-R-L-----SVPMAAS  
GS-----ELVTWLISLE-----  
---AGL-----DRHRATTMW---QALLEEGIIY-----  
-----H-----VTG-EHEFKDKC-VLYQFRSD  
R-----D---SG-----  
-----GGGCPT  
PQDI--AEAEHL-----QECLADLADRGPDW-----LRMVLRKPSNDRT  
ADDLE-----IIYEELLHMKPLSHLS-NSMKRELA-SVILFEAHPRPGTVV-----  
-----FEQGEEG--RSWYLV  
CGSVDVVIHGK-----GV-----VATLHSG-EDF  
GKLAL-----INEAPRA--ASIIVREENTHLLRVDKDDFNR-----ILRD--  
-----V-----  
-----  
-----EANTVRLKEHGKDVILE-----K-----  
-----SQGP---HS-----SVK-----YVVMACTPARM  
VEHLLDS-----RLDS-G-----SI-----DPALD---D-  
FLLTHVI--FI-----TTRHLVQELK-----K-----  
-----HY-----NM---ESP HHDKEHTDNYKRRVLLFVYR  
WVTIRYPALSD-PIIISFIE---ELSND--ASSEGE-----W-----EEA  
ALM-----  
---HRL-----SAQVARQQE---INSNLNK-----  
---WKLPP---TGQPIC-----LFSPSET---  
---GS-T---L-----  
-----  
-----  
-----IKPKDD--II-----FR-----  
VYCADHTYCTLRLPVSATAEQIKV-----CAADK-----LGLRVRPEDLIL  
AELKSN-----GERVN-----FRDVEVSVPTSLSLNGRIFVA  
PKDH---L-DALT-VIAEQ-----EAP-----TEGVE  
L--DLEDVSAKEMAYHMTMFDWELFWNIHEYELLY-----HTFGRHRF--GQSTANLD  
AFLRR-----FNELQYWV-----VTEICLTQSLSKR-----VQVLRKIIKLAAY-  
-----CKQYHNINGMFALVL-GLSNMAVSRLSLTWD-----  
-----KLPSKSRKLYMQ-LEATI-----DPSKNH---  
-RAYRG---VVSS-----MDSPLI-PFMP-----  
LLLKDMTFIHEGNK--TM-VD-----G-LVNFE-KM  
-----HM---LAQTLRTLRYCRS--R-----QLIIE-----DPP--  
-----TPKNE---S-----EVRA-----YV  
RCLRTIDNQRTL-----TSLSQKL  
-----EPRR-----S-----





LFLRR-----FNEIQFVW----ITEMCLCPQLSKR-----VQLLKKFIKIAAH-  
-----CKEYRNLNFAFIIIM-GLSNPAVCRLSQTWE-----  
-----KLPSKFKKFYVE-FENLM-----DPSRNH-----  
-RAYRL---TVAK-----LEPPII-PFMP-----  
LLIKDMTFTHEGKN--TF-ID-----S-LVNFE-KM  
-----RM--IANTVKIVRYCRS--Q-----RFSPE--  
-S-----PLPSKNH---P-----DAWT----YI  
RQLNVIDNQRL-----TQLSHGL  
-----EPRR-----S-----

```
>Rapgef4 [Heterocephalus glaber] 512992186
```

-----EANTVRLKEHDQDVLVLEK-----VPA-GNRASNQG  
NS---QP-QQ-----K-YTVMMSGTPEKI  
LEHFLET-----IRLEP-ALN-----EA-----TDSVLN---D-  
FVMMHCV--FM-----PNTQLCPALV-----A-----  
-----H-----Y-----HAQPSQ--GTEQEKLDYGLNNKRRVIRLVLQ  
WAATYGDLLQED-DVAMAFLE---EFYVS--VSDDA--RMIAAFK--EQ-LPELEKIV  
KQI---SED-AK-----APQKK-----  
---HKV-----LLQQFNTSD-ERAQ-KRQ-----



[illegible]

[illegible]

-----NIT-----NNVFVSVSKHPNKK-----  
-----SFLESP---AKVL-PKCTA-----QVLS-----  
-----EKIL-----RA-----GKTLR-YAILSSA  
PH-M-----IRDRKYH-----L-KTY-----RQC-CV  
GT-----ELVDWQMQQS-----  
---SCVH-----SRIQAVGMW---QVLLEEGVLN-----  
-----H-----VDG-ETSFQDKY-LFYRFLDD  
-----ERED---AC-V-----  
-----PD  
EER-RESQEEL-----QDTLLFLSQIGPDAL-----MRMILRKPPSERT  
ADELE-----IIYEELLHIKALSHLS-TTVKRELA-GVLIFESHEKAGTVL-----  
-----FNQGEEG--TSWYIIL  
KGSVNVIYGK----GV-----VCTLHEG-DDF  
GKLAL-----VNDAPRA--ASIVLREDNCHFRLVDKEDFNR-----ILRD--  
-----V-----  
-----  
-----EANTVRLKEHGQDVLVLEK----S----RNSVHG  
SS---TS-HY-----K-YNIMSGTPEKI  
LEHLLEM-----MRLDS-QFT-----KS-----DSALD---D-  
FVLMHCV--FM-----PNSQLCPVLT-----A-----  
-----H-----Y-----HAEALQ--GSEQEQLDYTLNNKRRVIRLVVK  
WAAVNGDHLQQE-DRA--FLE---EFLVM--VSNDV--KVLPALR--DQ-LSELERIL  
KSN--AED--AR-----SSQKK-----  
---HKV-----LLRQFSMGD-EKHQ-KCQ-----  
-----  
-----PIKGDE--IL-----FK-----  
VHCCDHTYTTRVPVAASVREVID-----AVADK-----LGSA-EG--LIL  
VGLSSA-----GEKSI-----FKPNDSVSFSTLSTNGRLFVC  
QRDQ---L-DLLT-PLPEQ-----EGP-----SSGSL  
AS--FELMSSKD VAYHITSYDWELFHCVHELELIY-----HTFGRQYV-KK-TTVNL D  
LFLRR-----FNEIQFWV-----ITEMCLCPQLNKR-----VQLLKKF I K I A A H -  
-----CKEYKNLNAFFAVIM-GLSNPAVSRLSQTWE-----  
-----KLPSKFKKFYEE-FENLM-----DPTRNH--  
-RAYRL---TVSK-----LDPPLI-PFMP-----  
LMIKDMTFTHEGNK--TF-ID-----N-LVNFE-KM  
-----RM---IANTVKIVRYCRS--Q-----MFSPD--  
-S-----PLAGKHH--P-----DVWT-----YV  
RQLNVIDNQRTL-----TQLSHGL  
-----EPRR-----S-----

-----  
---  
>Rapgef4\_[Lepisosteus\_oculatus]\_973161213  
-----  
-----  
-----  
-----  
-----  
-----MPDKD-----  
-----NMT-----NNALGSISKNLNK-----  
-----VPS-----  
-----EKIL-----RA-----GKILR-NSILSRA  
PP-M-----IRDRKYH-----L-KTY-----RQC-CV  
GT-----ELVDWLMQQS-----  
---PCVH-----SRTQAVGMW---QVLLEEGVLN-----  
-----H-----VDQ-EHNFQDKY-LFYRFLDD  
-----ERED---AP-L-----  
-----LS  
EEEE--KESEEEEL-----QDTLLLLSQTGPDAA-----MRMILRKPPGQRT  
VDDLE-----IIYEELLHIKALSHLS-TTVKRELA-GVLIFESHAKAGTVL-----  
-----FNQGEEG--TSWYIIL  
KGSVNVVIYGK-----GV-----VCTLHEG-DDF  
GKLAL-----VNDAPRA---ASIVLREDNCHFLRVDKEDFNR-----ILRD--  
-----V-----  
-----  
-----  
-----EANTVRLKEHEQDVLVLEK-----IST-GSRVLNHG  
NA---SS-QY-----K-YMVMSTGTPSKI  
LEHFLET-----MRLDS-NFT-----ES-----DPALD---D-  
FVLMHCV--FI-----PNTQLCPILM---A-----  
-----H-----Y-----HAQASQ---GSEQEKLDYTFNNKRRVIRLVLQ  
WASVYGDHLQEE-EAALAFLE---EFYVS--VSDDS--RVIPALK---EH-LPELEKIV  
KQN---TEE--AK-----SSQKK-----  
---HKV-----LLRQFSIGD-ERLQ-KRQ-----  
-----  
-----  
-----  
-----  
-----  
-----PIKSND---IL-----FK-----  
VYCIDHTYTTIRVSVAASVKEVIS-----AVADK-----LGSG-EE--LIL  
VHVNSA-----GDKVV-----LKPNDISVFTTSLINGRLFVC  
PRDQ---F-DSLA-PLPEQ-----EGP-----STGSI  
GT--FELMSSKDLAYQMTVYDWELFNCVHEHELIY-----HTFGRQHF-KK-TTANLD  
LFLRR-----FNELQLWV-----VTEICLCSQLSKR-----VQLLKKFIKIAAH-  
-----CKEYRNLNSFFAIIM-GLSNPAASRLSQTWE-----  
-----KLPSKFKKFYSE-FESLM-----DPSRNH---  
-RAYRL---TVAK-----LDPPII-PFMP-----  
LLMKDMFTTHEGNK--TF-ID-----S-LVNFE-KM  
-----RM---IANTVRIVRYCRS--Q-----PFNPD--  
-A-----SLANKNH---Q-----EVRS-----YV  
RQLNVVDNQRTL-----SQLSHRL  
-----EPRR-----N-----









[illegible]

[illegible]

-----N-----  
-----VPS-----  
-----EKIL-----RA-----GKILR-NAILSRA  
PH-M-----IRDRKYH-----L-KTY-----RQC-CV  
GT-----ELVDWMLQQT-----  
---PCVH-----SRIQAVGMW---QVLVEDGVLN-  
-----H-----VDQ-EHHFQDKY-LFYRFLDD  
-----EHED---AP-L-----  
-----PT  
EEEE--KECDEEL----QDTMLLLSQMGPDAH-----MRMILRKPPGQRT  
VDDLE----IIYEELLHIKALSHLS-TTVKRELA-GVLVFESHAKGGTVL-----  
-----FNQGEEG--TSWYIIL  
KGSVNVIYGK---GV-----VCTLHEG-DDF  
GKLAL-----VNDAPRA--ASIVLREDNCHFRLRVKD EDFNR-----ILRD--  
-----V-----  
  
-----EANTVRLKEHDQDVLVLEK----VPA-GNRASNQG  
NS---QP-QQ-----K-YTVMMSGTPEKI  
LEHFLET-----IRLEP-TLN-----EA---TDSVLN---D-  
FVMMHC V--FM-----PNTQLCPALV-----A-----  
-----H-----Y-----HAQPSQ---GTEQEKM DYALNNKRRVIRLV LQ  
WAAMYGDVLQED-DVAMAFLE---EFYVS--VSDDA--RMIAALK---EQ-LPELEQIV  
KQI---SED--AK-----APQKK-----  
---HKV-----LLQQFNTGD-ERAQ-KRQ-----  
  
-----PIRGSD E--VL-----FK-----  
VYCMDHTYT TIRVPVAASVKEVLS-----AVADK-----LGSG-EG--LI I  
IKMSSG-----GEKV V-----LKPNDVSVFTTLTINGRLFAC  
PREK---F-DSL T-PLPEQ-----EGP-----TVGTM  
GT--FEL MSSKDLAY QMTVYDWDL FSCVHELELI Y-----HTFGRHHF-KK-TTANLD  
LFLRR-----FNEIQFWV-----VTEIC LCSQPSKR-----VQLLK KFIKIAAH  
-----CKEYKNL NSFFAIVM-GLSNVAVSRLALTWE-----  
-----KLPSKF KK FYAE-FESLM-----DPSRNH---  
-RAYRL---TVAK-----LDPPLI-PFMP-----  
LLIKDMTF THEGNK--TF-ID-----N-LVNFE-KM  
-----RM---IANTARTVRYCRS--Q-----PFNPD--  
-A-----AQANKNH-----Q-----DVRS-----YV  
RQLNVIDNQRTL-----SQMSHRL  
-----EP RR-----P-----

-----  
---  
>Rapgef4\_[Loxodonta\_africana]\_731458747  
-----  
-----  
-----  
-----  
-----MAG-L

LAPPYG--VMETGS--N-N-----DRIPDKE-----  
-----N-----T-----  
-----PLIEPHVPLRPAN-TITK-----VPS-----  
-----EKIL-----RA-----GKILR-NVILSRA  
PH-M-----IRDRKYH-----L-KTY-----RQC-CV  
GT-----ELVDWMMQQT-----  
---QCVH-----SRTQAVGMW---QVLLEDGVLN-----  
-----H-----VDQ-EHHFQDKY-LFYRFLDD  
-----EHED---AP-L-----  
-----PT  
EEEE--KECDEEL-----QDTMLLSQMGPDH-----MRMILRKPPGQRT  
VDDLE-----IIYEELLHIKALSHLS-TTVKRELA-GVLIFESHAKGGTVL-----  
-----FNQGEEG--TSWYIIL  
KGSVNVVIYGK----GV-----VCTLHEG-DDF  
GKLAL-----VNDAPRA---ASIVLREDNCHFLRVDKEDFNR-----ILRD--  
-----V-----  
-----  
-----  
-----EANTVRLKEHDQDVLVLEK-----VPA-GNRASNQG  
NS----QS-QQ-----K-YTVMSGTPEKI  
LEHFLET-----IRLEP-ALN-----EA-----TDSVLN---D-  
FVMMHCV--FM-----PNTQLCPALV---A-----  
-----H-----Y-----HAQPSQ---GTEQEKM DYTLNNKKRVIRLVLQ  
WAATYGDLLQED-DVAMAFLE---EFYVS--VSDDA--RMIAALK---EQ-LPDLEKIV  
KQI---LEE--AK-----APQKK-----  
---HKV-----LLQQFNTGD-ERAQ-KRQ-----  
-----  
-----  
-----  
-----  
-----  
-----PIRGSDE--VL-----FK-----  
VYCMDHTYTTIRVPVAASVKEVIS-----AVADK-----LGSG-EG--LII  
VKMSSG-----GEKVL-----LKPNDVSVFTTLTINGRLFAC  
PREQ---F-DSLT-PLPEQ-----EGP-----TVGTV  
GT--FELMSSKDLAYQMTIYDWELFNCVHELELIY-----HTFGRHNF-KK-TTANLD  
LFLRR-----FNEIQFWV-----VTEICLCSQLSKR-----VQLLKKFIKIAAH-  
-----CKEYKNLNSFFAIVM-GLSNVAVSRLALTWE-----  
-----KLPSKFKKFYAE-FESLM-----DPSRNH---  
-RAYRL---TVAK-----LEPPLI-PFMP-----  
LLIKDMFTTHEGNK--TF-TD-----N-LVNFE-KM  
-----RM---IANTARTVRYCRS--Q-----PFNPD--  
-A-----AQANKNH---Q-----DVRs-----YV  
RQLNVIDNQRTL-----SQMSHRL  
-----EPRR-----P-----



LFLRR-----FNEIQFVW----VTEICLCSQLSKR-----VQLLKYYIKIAAH-  
 -----CKEYKNLNSFFAIIM-GLSNVAVSRLSLTWE-----  
 -----KLPSKFKKIYAE-FESLM-----DPSRNH-----  
 -RAYRL---TVAK-----LDPPII-PFMP-----  
 LLIKDMFTTHEGNK--TF-TD-----N-LVNFE-KM  
 -----RM--IANTVRTVKFCRS--Q-----SFNPD--  
 -A-----ALANKNH--Q-----DVRS----YV  
 RQLNVIDNQRTL-----SQMSHRL  
 -----EPRR-----A-----





[illegible]

[illegible]

-----GWSQDP-P-----

-----FPRPHLK--VGW--R

QGNLD---GDSC---DAVT-----ICTLGIG-TAF

GE-SI-----LDNTPRH--ATIVTRE-YSELLRIEQKDFKA-----LWEKYR

QYMSELLTPPYGVMETGSNNDRMPDKDSMSSGALCQVSKNCNKSLM-----

-----  
---  
>Rapgef4\_[Melopsittacus\_undulatus]\_527269285  
-----MVAA-----HA-----SH-----SSS  
SGEWIA---CLDK-----RPLE----RSEDVDIIFTRLKEVKAFEKFHPNLL  
QQICLCGY--YENLE--KGITLFRQGDIGTNWYAVLTGSLDVKVSD-TSNHQDA-----  
-----VTICTLGIGTAFGESILDNT-PRHATIV-TREYSELL-----  
-----RIEQKD-----FKALW---EKYRQYMSG-L  
LTPPYG--VMETGS--N-N-----DRMPDKD-----  
-----N-----T-----  
-----PLIEPHIPHRSTK-TITQ-----VPS-----  
-----EKIL-----RA-----GKILR-NTILSRA  
PH-M-----IRDRKYH-----L-KTY-----RQC-CV  
GT-----ELVDWMMQQS-----  
---PCVH-----LRTQAVGMW---QVLLEEGVLN-----  
-----H-----VDQ-EHHFQDKY-LFYRFLDD  
-----EHED---AP-L-----  
-----PT  
EEEE--KECDEEL-----QDTMLLSQIGPDAH-----MRMILRKPPGQRT  
VDDLE-----FIYEELLHIKALSHLS-TTVKRELA-GVLIFESHKAGTVL-----  
-----FNQGEEG--TSWYIIL  
KGSVNVVIYGK----GV-----VCTLHEG-DDF  
GKLAL-----VNDAPRA---ASIVLREDNCHFLRVDKEDFNR-----ILRD--  
-----V-----  
-----  
-----EANTVRLKEHDQDVLVLEK-----IPA-GNRVSNQG  
NS----QP-QH-----K-YIVMSGTPEKI  
LEHFLET-----MRLEA-TLN-----EA-----TDSVLN---D-  
FIMMHCV--FM-----PNSQLCPALM---A-----  
-----H-----Y-----HAQPSQ---GTEQEKMDYALNNKRRVIRLVLQ  
WAALYGDLLQED-EAAMAFLE---EFYVS--VSDDT--RMIAALK---EQ-LPELEKIV  
KQV---SEE--PK-----APQKK-----  
---HKV-----LLQLFNTSD-DRAQ-KRQ-----  
-----  
-----  
-----  
-----  
-----PIRGSDE--VL-----FK-----  
VYCIDQTYTTIRVPVSSSVKEVIS-----AVADK-----LGSG-EG--LII  
VKMSSG-----GEKVV-----LKPHDVSFVTTLSVNGRLFAC  
PRDQ---F-DSLA-PLPEQ-----EGP-----STGTV  
GT--FELMSSKDLAQMTIYDWELFNCVHELELIY-----HTFGRHNF-KK-TTANLD  
LFLRR-----FNEIQFWV-----VTEICLCAQLSKR-----VQLLKYYIKIAAH-  
-----CKEYKNLNSFFAIIM-GLSNVAVSRLSLTWE-----  
-----KLPSKFKKIYAE-FESLM-----DPSRNH---  
-RAYRL---TVAK-----LDPPII-PFMP-----  
LLIKDMFTTHEGNK--TF-TD-----N-LVNFE-KM  
-----RM---IANTVRTVKFCRS--Q-----SFNPD--  
-A-----ALTNKNH---Q-----DVRs-----YV  
RQLNVIDNQRTL-----SQMSHRL  
-----EPRR-----A-----



LFLRR-----FNEIQFVW----VTEICLCSQLSKR-----VQLLKKYIKIAAH-  
-----CKEYKNLNSFFAIIM-GLSNVAVSRLSLTWE-----  
-----KLPSKFKKIYAE-FESLM-----DPSRNH-----  
-RAYRL---TVAK-----LDPPII-PFMP-----  
LLIKDMFTTHEGNK--TF-TD-----N-LVNFE-KM  
-----RM---IANTVRTVKFCRS--Q-----SFNPD--  
-T-----ALANKNH---Q-----DVRS----YV  
RQLNVIDNQRTL-----SQMSHRL  
-----EPRR-----A-----

```
---
>Rapgef4_[Mesitornis_unicolor]_704578686
```

```

-----M-----FT-----
-----EKV-----LKPHDVSFVTTLSVNGRLFAC
PRDQ--F-DSLA-PLPEQ-----EGP-----SAGTV
GT--FELMSSKDLAHQMTIYDWELFNCVHELELIY-----HTFGRHNF-KK-TTANLD
LFLRR-----FNEIQFWV-----VTEICLCSQLSKR-----VQLLKYYIKIAAH
-----CKEYKNLNSFFAIIM-GLSNVAVSRLSLTWE-----
-----KLPSKFKKIYAE-FESLM-----DPSRNH-----
-RAYRL---TVAK-----LDPPII-PFMP-----
LLIKDMFTTHEGNK--TF-TD-----N-LVNFE-KM
-----RM---IANTVRTVKFCRS--Q-----SFNPD-----
-A-----ALTNKN-----HQ-----DVR-----YV
RQLNVIDNQRTL-----SQMSHRL
-----EPRR-----A-----
-----
---
>Rapgef4_[Mesocricetus_auratus]_880859282
-----M-----
-----
-----LY---KKYRQYMAG-L
LAPPYG--VMETGS--N-N-----DRIPDKE-----
-----N-----
-----VPS-----
-----EKIL-----RA-----GKILR-IALSRA
PH-M-----IRDRKYH-----L-KTY-----RQC-CV
GT-----ELVDWMIQQT-----
---SCVH-----SRTQAVGMW---QVLLEDGVLN-----
-----H-----VDQ-ERHFQDKY-LFYRFLDD
-----EHED---AP-L-----
-----PT
EEEE--KECDEEL-----QDTMLLLSQMGPDH-----MRMILRKPPGQRT
VDDLE-----IIYDELLHIKALSHLS-TTVKRELA-GVLIFESHAKGGTVL-----
-----FNQGEEG--TSWYIIL
KGSVNVVIYGK-----GV-----VCTLHEG-DDF
GKLAL-----VNDAPRA---ASIVLREDNCHFLRVDKEDFNR-----ILRD-----
-----V-----
-----
-----EANTVRLKEHDODVVLVLEK-----VPA-GSRASNOQ

```

NS---QP-QQ-----K-YTVMSGTPEKI  
LEHFLET-----IRLEP-SLN-----EA-----TDAVLN---D-  
FVMMHCV--FM-----PNTQLCPALV-----A-----  
-----H-----Y-----HAQPSQ---GTEQERMDYALNNKRRVIRMVLO  
WAAMYGDLLQED-DVAMAFLE---EFYVS--VSDDA--RMMAAFK---EQ-LPELEKIV  
KQI---SED--AK-----APQKK-----  
---HKV-----LLQQFNNTGD-ERAQ-KRQ-----  
-----  
-----  
-----  
-----  
-----  
-----PIRGSDV--VL-----FK-----  
VYCMDHTYTTIRVPVAASVKEVIS-----AVADK-----LGSG-EG--LII  
VKMNSG-----GEKVV-----LKPNDVSVFTTLTINGRLFAC  
PREQ--F-DSLT-PLPEQ-----EGP-----TTGTV  
GT--FELMSSKDLAYQMTTYDWELFNCVHELELIY-----HTFGRHNF-KK-TTANLD  
LFLRR-----FNEIQFWV-----VTEICLCSQLSKR-----VQLLKKFIKIAAH-  
-----CKEYKNLNSFFAIVM-GLSNVAVSRLALTWE-----  
-----KLPSKFKKFYAE-FESLM-----DPSRNH---  
-RAYRL---TAAK-----LDPPLI-PFMP-----  
LLIKDMFTFHEGNK--TF-ID-----N-LVNFE-KM  
-----RM---IANTARTVRYCRS--Q-----PFNPD---  
-A-----AQANKNH--Q-----DVRN---YV  
RQLNVIDNQRTL-----SQMSHRL-----  
-----EPRR-----P-----

-----MDK-----RCTD-----RTEDDLEMIYAKLRSMPPFSQLHPVLL  
 QQLSFYGY--YEDID--AGVTLFRREGDKGNWYAVLKGSLDVQIANPSGASNDN-----  
 -----VTLCTLGVGRAFGESISGLSLPHSATVV-TNECCCELLRIDQRDFQLLWERN--  
 --RH--LMEDMI-----SPLSTLRGITHH-PVHPSLASQ-Q  
 ATQQQSQSSIHQGSHTLNKMTSLGAPEHIGPPEPIRRASTNS-----  
 -----VRLSGEGQFQLQDTHPQLNNKFYPS-----  
 -----SKVIPVPVQVAGL-QQNQQSMQQSQQLHLHQAQQQQQPQPQQQFHLQQ-----  
 ---QNSASALA-----RA-----SWVLR-TVLLYQA  
 PQ-L-----VRDRRV-----PGRAF-----KRC-MV  
 GT-----EMVDWMLQMG-----  
 CVHVRLS-----SRAQAAGMW---QVLLEEGCLN-----  
 -----H-----VTG-ERQFEDKY-LFYRFRDD  
 -----DAEH---PR-L-----  
 -----PT



[illegible]

-----N-----  
-----VPS-----  
-----EKIL-----RA-----GKILR-IALSRA  
PH-M-----IRDRKYH-----L-KTY-----RQC-CV  
GT-----ELVDWMIQQT-----  
---SCVH-----SRTQAVGMW---QVLLEDGVLN-  
-----H-----VDQ-ERHFQDKY-LFYRFLDD  
-----EHED---AP-L-----  
-----PT  
DEEK--KECDEEL-----QDTMLLLSQMGPDAH-----MRMILRKPPGQRT  
VDDLE-----IIYDELLHIKALSHLS-TTVKRELA-GVLIFESHAKGGTVL-----  
-----FNQGEEG--TSWYIIL  
KGSVNVVIYGK--GV-----VCTLHEG-DDF  
GKLAL-----VNDAPRA--ASIVLREDNCHFRLRVDKEDFNR-----ILRD--  
-----V-----  
-----  
-----EANTVRLKEHDQDVLVLEK----VPA-GSRASNQG  
NS---QP-QQ-----K-YTVMMSGTPEKI  
LEHFLET-----IRLEP-SLN-----EA---TDSVLN---D-  
FVMMHCV--FM-----PNTQLCPALV-----A-----  
-----H-----Y-----HAQPSQ---GTEQERMDYALNNKRRVIRLVLQ  
WAALYGDLLQED-DVAMAFLE---EFYVS--VSDDA--RMMAAFK---EQ-LPELEKIV  
KQI---SED--AK-----APQKK-----  
---HKV-----LLQQFNTGD-ERAQ-KRQ-----  
-----  
-----  
-----PIRGSDE--VL-----FK-----  
VYCMDHTYTTIRVPVAASVKEVIS-----AVADK-----LGSG-EG--LII  
VKMNSG-----GEKV-----LKPNDVSVFTTLTINGRLFAC  
PREQ--F-DSLT-PLPEQ-----EGP-----TTGTV  
GT--FELMSSKDLAYQMTTYDWELFNCVHELELIY-----HTFGRHNF-KK-TTANLD  
LFLRR-----FNEIQFWV-----VTEICLCSQLSKR-----VQLLKKFIKIAAH  
-----CKEYKNLNSFFAIVM-GLSNVAVSRLALTWE-----  
-----KLPSKFKKFYAE-FESLM-----DPSRNH---  
-RAYRL---TAAK-----LDPPII-PFMP-----  
LLIKDMFTFHEGKN--TF-ID-----N-LVNFE-KM  
-----RM---IANTARTVRYRS--Q-----PFNPD--  
-A-----AQANKNH-----Q-----DVR-----YV  
RQLNVIDNQRTL-----SQMSHRL  
-----EPRR-----P-----  
-----  
-----  
-----  
-----  
-----  
-----  
-----

-----  
---  
>Rapgef4\_[Miniopterus\_natalensis]\_1016626283  
-----  
-----  
-----  
-----  
-----MAG-L  
LAPPYG--VMETGS--N-N-----DRIPDKE-----  
-----N-----T-----  
-----PPIEPHVPPRPAN-TIPK-----VPS-----  
-----EKIL-----RA-----GKILR-NAILSRA  
PH-M-----IRDRKYH-----L-KTY-----RQC-CV  
GT-----ELVDWMLQQT-----  
---PCVH-----SRTQAVGMW---QVLVEDGVLN-----  
-----H-----VDQ-EHHFQDKY-LFYRFLDD  
-----DHED---AP-L-----  
-----PT  
EEEE--KECDEEL-----QDTMLLSQMGPDH-----MRMILRKSPGQRN  
MDDLE-----IIYDELLHIKALSHLS-TTVKRELA-GVLIFESHAKGGTVL-----  
-----FNQGEEG--TSWYIIL  
KGSVNVVIYGK----GV-----VCTLHEG-DDF  
GKLAL-----VNDAPRA---ASIVLREDNCHFLRVDKEDFNR-----ILRD--  
-----V-----  
-----  
-----EANTVRLKEHDQDVLVLEK-----VPA-GSRASNQG  
NS----QP-QQ-----K-YTVMSGTPEKI  
LEHFLET-----IRLEP-ALN-----EA-----TDSFLN---D-  
FVMMHCV--FM-----PNTQLCPALM---A-----  
-----H-----Y-----HAQPSQ---GTEQEKVDYALNNKRRVVRVLVQ  
WASAYGDLLQED-SVAMAFLE---EFYVS--VSDDA--RMIAALK---EQ-LPELERIV  
KQI---SED--AK-----NPQKK-----  
---HKV-----LLQHFNFTGD-ERAQ-KRQ-----  
-----  
-----  
-----  
-----  
-----PIRGSDE--VL-----FK-----  
VYCMDHTYTTIRVPVAASVKEVIS-----AVADK-----LGSG-EG--LII  
VKMSSG-----GEKVV-----LKPNDVSVFTTLTINGRLFAC  
PREQ---F-DSLT-PLPEQ-----EGP-----TVGTV  
GT--FELMSSKDLAYQMTIYDWELFNCVHELELIY-----HTFGRHNF-KK-TTANLD  
LFLRR-----FNEIQFWV-----ITEICLCSQPSKR-----VQLLKKFIKIAAH-  
-----CKEYKNLNSFFAIVM-GLSNVAVSRLALTWE-----  
-----KLPSKFKKFYAE-FESLM-----DPSRNH---  
-RAYRL---TVAK-----LEPPLI-PFMP-----  
LLIKDMFTTHEGNK--TF-ID-----N-LVNFE-KM  
-----RM---IANTARMVRYCRS--Q-----PFNLD--  
-A-----AQANKNH---Q-----DVRs-----YV  
RQLNVIDNQRTL-----SQMSHRL  
-----EPRR-----P-----









```

EEEK--KECDEEL-----QDTMLLLSQMGPDah-----MRMILRKSPGQRS
MDDLE-----IIYDELLHIKALSHLS-TTVKRELA-GVLIFESHAKGGTVL-----
-----FNQGEEG--TSWYIIL
KGSVNVIYGK----GV-----VCTLHEG-DDF
GKLAL-----VNDAPRA---ASIVLREDNCHFLRVDKEDFNR-----ILRD--
-----V-
-----
-----EANTVRLKEHDQDVLVLEK-----VPA-GSRASNQG
NS---QP-QQ-----K-YTVMSTPEK
LEHFLET-----IRLEP-ALN-----EA-----TDSVLN---D-
FVMMHCV--FM-----PNTQLCPALV----AQY-----PFSVKSLYSL
QDTLVHVGH-----Y-----LTPASE---GTEQEKM DYALNNKRRVVRLVLQ
WAAVYGDLLQED-EVAMAFLE---EFYVS--VSDDA--RMIAALK---EQ-LPELERIV
KQI---SED--AK-----NPQKK
---HKV-----LLQHfNTSD-ERAQ-KRQ-----
-----
-----PIRGsDE--VL-----FK-
VYCMDHTYTtIRVPVAASVREVIS-----AVADK-----LGSG-EG--LI I
VKMSSG-----GEKVv-----LKPNDVSVFTTLTINGRLFAC
PREQ---F-DSL T-PLPEQ-----EGP-----TVGT V
GT--FELMSSKD LAYQM TIYDWEL FNCVHE-----VSRLIESVSS-
-----CKEyKNLNSFFAI VM-GLSNVAVSRLALTWE-----
-----KLPSKFkKYAE-FESLM-----DPSRNH--
-RAYRL---TVAK-----LEPPLI-PFMP-----
LLIKDMTFtTHEGNK--TF-ID-----N-LVNFE-KM
-----RM---IANTARTVR YCRS--Q-----PFNL D--
-A-----AQANKNH-----Q-----DVRS-----YV
RQLNVIDNQRTL-----SQMSHRL
-----EP RR-----P-----
-----
-----
>Rapgef4_[Myotis_lucifugus]_558101259
-----
-----MAG-I
LAPPYg--VMETGs--N-N-----DRIPDKE-----

```



[illegible]

-----  
---  
>Rapgef4\_[Neolamprologus\_brichardi]\_583982936  
-----MV-----A-----VQ---TSPNSSPS  
-AEWIC---CLDK-----RPAE-----RSGEDVDIILTRLREVKAQRFPPPLL  
LQICACAF--YECLE--KGITLFRQGDIGTSWYAVLSGSLDVKVSE-TANHQDA-----  
-----VTICTLGIGTAFGESILDNT-PRHATIV-SRETSELL-----  
-----RIEQRE-----FKTLWE---KYRQSLAA-L  
LAPPYG--AMESGS---NN-----DRLTDKD-----  
-----NMN-----S-----  
-----DSA---NKAH-----N-----KIPS-----  
-----EKLQ-----RA-----GKVLR-NAILSRA  
PH-M-----IRDRKYH-----L-KTY-----RQC-CV  
GT-----ELVDWLVLQS-----  
---ACVL-----TRSHAVGMW---QALLEEGVLN-----  
-----H-----VDQ-ELGFYDKY-LFYRFLDD  
-----EEED---TP-L-----  
-----PS  
EEEE--RESEEEEL-----PETILFLAQIGPDAL-----LRMILRKSPGQRT  
GDDLE-----IIYDELLHIKALAHLS-NTVKRELA-SVVIFESHAKAGTVL-----  
-----FNQGEEG--TSWYIIL  
KGSVNVVIYGK----GV-----VCTLHEG-DDF  
GKLAL-----VTDSPRA---ASIVLREDNCHFLRVDKEDFNR-----ILRD--  
-----V-----  
-----  
-----EANTVRLKEHDPVLVLEK-----S---PRASTLG  
N-----I-----K-YTVISGTPEKI  
LEHFLET-----MRMDI-HHS-----DP-----DPAVD---D-  
FVLMHCV--FM-----PNSQLCPLLL---S-----  
-----Q-----Y-----HVTSP---GSEQERLEYALNSKRRALIMTLR  
WANAHTYLLQEE-PAAIFFLE---ELYGS--LSNDS--RMLRALK---DL-VPDLEKV  
KLH---SEE--AK-----ATKKK-----  
-----T-----LIRQFSNGE-ERLQ-KKQ-----  
-----  
-----  
-----  
-----  
-----PIRNQDD--IL-----LK-----  
VYCSDHITYTTIRIPVAATGREVIS-----AVTDK-----LGTT-DE--LLL  
VHLSSA-----GEKQI-----LKPNDVSFSTLSINGRLFAC  
PREQ---L-NSLT-PLPDQ-----EGP-----TAGSM  
ST--FELMSSKDLAYQMTMFDWELFSCVHEHELLY-----HTFGCQSF-KR-TTANLD  
LFLRR-----FNQVQLWV-----VTEVCLCGQLSKR-----VQLLKKFIKIAAH-  
-----CREFKNLNSFFAIIM-GMSNPAVSRLSQTWE-----  
-----KLPTKFKKFYAE-FENMM-----DPSRNH---  
-RSYRL---TVTK-----LEPPII-PFVP-----  
LLLKDMFTTHEGNK--TF-ID-----N-MVNFE-KM  
-----RI---IANTIRQVRHCRS--Q-----PFNPD--  
-I-----CQPNKNQ---A-----EVRG-----YV  
RKLCVIDNQRAL-----TQLSYRL  
-----EPRR-----T-----

[illegible]

```
-----  
-----  
-----  
-----  
-----  
-----  
-----  
-----  
-----  
-----  
-----  
-----  
-----  
-----  
-----  
-----  
  
-----  
>Rapgef4_[Nipponia_nippon]_694839384  
-----MVAA-----HT-----SH-----SSS  
SGEWIA---CLDK-----RPLE----RSSEVDIIFTRLKEVKAFEKFHPNLL  
QQICLCGY--YENLE--KGITLFRQGDIGTNWYAVLTGSLDVKVSD-TSNHQDA-----  
-----VTICTLGIGTAFGESILDNT-PRHATIV-TRECSELL-----  
-----RIEQKD-----FKALW--EKYRQYMSG-L  
LTPPYG--VMETGS--N-N-----DRMPDKD-----  
-----N-----T-----  
-----PLIEPHIPHRPTK-TITQ-----VPS-----  
-----EKIL-----RA-----GKILR-NTILSRA  
PH-M-----IRDRKYH-----L-KTY-----RQC-CV  
GT-----ELVDWMMQQS-----  
---PCVH-----SRTQAVGMW--QVLLEEGLVN-----  
-----H-----VDQ-EHHFQDKY-LFYRFLDD  
-----EHED--AP-L-----  
-----PT  
EEEE--KECDEEL-----QDTMLLSQIGPDAH-----MRMILRKPPGQRT  
VDDLE----IIYEELLHIKALSHLS-TTVKRELA-GVLIFESHPKAGTVL-----  
-----FNQGEEG--TSWYIIL  
KGSVNVVIYGK----GV-----VCTLHEG-DDF  
GKLAL-----VNDAPRA--ASIVLREDNCHFLRV DKEDFNR-----ILRD--  
-----V-----  
-----  
-----EANTVRLKEHDQDVLVLEK-----IPA-GNRVSNOG  
NS---QP-QH-----K-YIVMSGTPEKI  
LEHFLET-----MRPEA-TLN-----EA-----TDSVLN---D-  
FIMMHCV-FM-----PNSQLCPALM-----A-----  
-----H-----Y-----HAQPSQ--GTEQEKM DYALNNKRRVIRLV LQ  
WAALYGDLLQED-EAAMAFLE---EFYVS--VSDDT--RMIAALK--EQ-LPELEKVV  
KQV---SEE-PK---APQKK-----  
---HKV-----LLQLFNTSD-DRAQ-KRQ-----
```



SS----AS-HY-----K-YNIMSGTPEKI  
LEHLLLE-----MRLDS-QLT-----ES-----DSALD---D  
FVLMHCV--FI-----PNSQLCPVLR-----S-----  
-----H-----Y-----QAQALQ--GSEQEKLDYTLNSKRRVIRLVMK  
WAAVHGEHLQQE-NTA--FLE---EFLRA--VSDDA--KVLPALR--DQ-LTELERIV  
KNN--AED--FK-----ASQKK-----  
---RKI-----LLQQFSTGD-EKLQ-KRQ-----

```
>Rapgef4_[Notothenia_coriiceps]_736302842
```

```
>Rapgef4 [Octopus bimaculoides] 961078509
```

[illegible]



-----  
---  
>Rapgef4\_[Odobenus\_rosmarus\_divergens]\_472376522  
-----MVAA-----HA-----AH-----SSS  
SAEWIA---CLDK-----RPLE----RSEDVDIIFTRLKEVKAFEKFHPNLL  
HQICLCGY--YENLE--KGITLFRQGDIGTNWYAVLAGSLDVKVSE-TSSHQDA-----  
-----VTICTLGIGTAFGESILDNT-PRHATIV-TRESSELL-----  
-----RIEQKD-----FKALW---EKYRQYMAG-L  
LAPPYG--VMETGS--N-N-----DRIPDKE-----  
-----N-----  
-----VPS-----  
-----EKIL-----RA-----GKILR-NAILSRA  
PH-M-----IRDRKYH-----L-KTY-----RQC-CV  
GT-----ELVDWMLQQT-----  
---SCVH-----SRTQAVGMW---QVLVEDSVLN-----  
-----H-----VDQ-EHHFQDKY-LFYRFLDD  
-----EHED---AP-L-----  
-----PT  
EEEE--KECDEEL-----QDTMLLLSQMGPDH-----MRMILRKPPGQRT  
VDDLE-----IIYEELIHIALSHLS-TTVKRELA-GVLIFESHAKGGTVL-----  
-----FNQGEEG--TSWYIIL  
KGSVNVVIYGK----GV-----VCTLHEG-DDF  
GKLAL-----VNDAPRA---ASIVLREDNCHFLRVDKEDFNR-----ILRD--  
-----V-----  
-----  
-----EANTVRLKEHDQDVLVLEK-----VPA-GNRASNQG  
NS----QP-QQ-----K-YTVMSGTPEKI  
LEHFLET-----IRLEP-ALN-----EA-----TDSVLN---D-  
FVMMHCV--FM-----PNTQLCPALV---A-----  
-----H-----Y-----HAQASQ---GTEQEKMDYALNNKRRVIRLVLQ  
WATVYGDALQED-DVAVAFLE---EFYVS--VSDDA--RMIAALK---DQ-LPELEKIV  
KQI---SED--AK-----APQKK-----  
---HKV-----LLQQFNTGD-ERAQ-KRQ-----  
-----  
-----  
-----PIRGSDE--VL-----FK-----  
VYCMDHTYTTIRVPVAASVKEVIS-----AVADK-----LGSG-EG--LII  
VKMSSG-----GEKVV-----LKPNDVSVFTTLTINGRLFAC  
PREQ---F-DSLT-PLPEQ-----EGP-----TVGTV  
GT--FELMSSKDLAYQMTIYDWELFNCVHELELIY-----HTFGRHNF-KK-TTANLD  
LFLRR-----FNEIQFWV-----VTEICLCSQPSKR-----VQLLKKFIKIAAH-  
-----CKEYKNLNSFFAIVM-GLSNVAVSRLALTWE-----  
-----KLPSKFKKFYAE-FESLM-----DPSRNH---  
-RAYRL---TVAK-----LEPPLI-PFMP-----  
LLIKDMFTTHEGNK--TF-ID-----N-LVNFE-KM  
-----RM---IANTARTVRYCRS--Q-----AFNPD--  
-A-----AQANKNH---Q-----DVRs-----YV  
RQLNVIDNQRTL-----SQMSHRL  
-----EPRR-----P-----







[illegible]

[illegible]

[illegible]

-----  
---  
>Rapgef4\_[Oryctolagus\_cuniculus]\_1040225784  
-----MVAA-----HA-----AH-----SSS  
SAEWIA---CLDK-----RPLE----RSEDVDIIFTRLKEVKAFEKFHPNLL  
HQICLCGY--YENLE--KGITLFRQGDIGTNWYAVLAGSLDVKVSE-TSSHQDA-----  
-----VTICTLGIGTAFGESILDNT-PRHATIV-TRESSELL-----  
-----RIEQKD-----FKALW---EKYRQYMAG-L  
LAPPYG--VMETGS--N-N-----DRIPDKE-----  
-----N-----  
-----VPS-----  
-----EKIL-----RA-----GKILR-NAILSRA  
PH-M-----IRDRKYH-----L-KTY-----RQC-CV  
GT-----ELVDWMMQQT-----  
---PCAH-----SRTQAVGMW---QVLLEDGVLN-----  
-----H-----VDQ-EHHFQDKY-LFYRFLDD  
-----EQED---AP-L-----  
-----PT  
EEEE--KECDEEL-----QDTMLLLSQMGPDHAH-----MRMILRKPPGQRT  
VDDLE-----IIYEELLHIKALSHLS-TTVKRELA-GVLIFESHAKGGTVL-----  
-----FNQGEEG--TSWYIIL  
KGSVNVVIYGK----GV-----VCTLHEG-DDF  
GKLAL-----VNDAPRA---ASIVLREDNCHFLRVDKEDFNR-----ILRD--  
-----V-----  
-----  
-----EANTVRLKEHDQDVLVLEK-----VPA-GNRASNQG  
NS----QP-QQ-----K-YTVMSGTPEKI  
LEHFLET-----IRLEP-ALN-----EA-----ADSVLS---D-  
FVLMHCV--FM-----PNTQLCPALV---A-----  
-----H-----Y-----HAQPSQ---GTEQEKMDYSLNNKRRVIRLVLQ  
WAATYGDLLQED-DVAVAFLE---EFYVS--VSDDA--RVIATLK---EQ-LPELEKIV  
KQI---SED--AK-----APQKK-----  
---HKV-----LLQQFNTSD-ERSQ-KRQ-----  
-----  
-----  
-----  
-----  
-----PIRGSDE--VL-----FK-----  
VYCMDHTYTTIRVPVAASVKEVIS-----AVADK-----LGSG-EG--LII  
VKMSSG-----GEKVV-----LKPNDVSVFTTLTINGRLFAC  
PREQ---F-DSLT-PLAEQ-----EGP-----TVGTV  
AT--FELMSSKDLAYQMTIYDWELFNCVHELELIY-----HTFGRHNF-KK-TTANLD  
LFLRR-----FNEIQFWV-----ITEICLCSQLSKR-----VQLLKKFIKIAAH-  
-----CKEYRNLNSFFAIVM-GLSNVAVSRLALTWE-----  
-----KLPSKFKKFYAE-FESLM-----DPSRNH---  
-RAYRL---TVAK-----LEAPLI-PFMP-----  
LLIKDMFTTHEGNK--TF-TD-----N-LVNFE-KM  
-----RM---IANTARTVRYYS--Q-----PFNLD--  
-A-----AQANKNH---Q-----DVRs-----YV  
RQLNVIDNQRTL-----SQMSHRL  
-----EPRR-----P-----



```
>Rapgef4_[Oryzias_latipes]_765148738
-----MQPRKMV-----A-----LQ---PSPSSSPS
LAEWIC--CLDK-----RPSE----RSGEDVDIILTRLREVKAQRFPPPLL
LQICACAF--YECLE--KGITLFRQGDIGTSWYAVLSGSLDVKVSE-TANHQDA-----
-----VTICTLGIGTAFGESILDNT-PRHATIV-SRETSELL-----
-----RIEQRE-----FKTLWE--KYRQSLAG-L
LAPPYG--AMESGS---NN-----DRLADKD-----
-----NMN-----S-----
-----ESG--SKAH-----N-----KIPS-----
-----EKLQ-----RA-----GKVLNR-NAILSRA
PH-M-----IRDRKYH-----L-KTY-----RQC-CV
GT-----ELVDWLVMQS-----
---ACVL-----TRSHAVGMW--QVLLEEGVLN-----
-----H-----VDQ-DLGFQDKY-LFYRFLDD
-----EDED--TP-L-----
-----PS
EEEE--RESEEEL-----PETILFLAQIGPDAL-----LRMILRKSPGQRT
GDDLE-----IIYDELLHIKALAHLN-NTVKRELA-SVVIFESHAKAGTVL-----
-----FNQGEEG--TSWYIIL
KGSVNVIYVGK----GV-----VCTLHEG-DDF
GKLAL-----VTDSPRA--ASIVLREDNCHFLRVDKEDFNR-----ILRD--
-----V-----
-----
-----EANTVRLKEHEQSVLVLEK----S---PRASTLG
G-----I-----K-YTVISGTPEKI
LEHFLEA-----MRLDI-HHN-----EP-----DPAVD---D-
FVLMHCV--FM-----PNSQLCPLLM-----A-----
-----H-----Y-----HAASPP--GSEQERLEYALNCKRRVLILALR
WVNAHTYLLQEE-PAAISFLE---ELYGS--VSNDN--RILRGLK--DL-AVDLEKVV
KLH--SEE--AK-----SSKRK-----
-----T-----LIRQFSNGE-ERLQ-KKQ-----
-----
-----
-----
-----
-----PIKNQDD--IL-----LK-----
VYCSDHTYTITIRIAVAATGREVIS-----AVTDK-----LGTA-DE--LLL
IHLSSA-----GEKQI-----LKPNDVSVFSTLSINGRLFAC
PRDQ--L-SGLT-PHPDQ-----EGP-----SAGSM
ST--FELMSSKDLAYOMTMFDWELFSCVHEHELLY-----HTFGROSF-RR-TTANLD
```

LFLRR-----FNQVMLWV----VTEVCLCNQLSKR-----VQLLKKFIKIAAH-  
 -----CREFKNLNSFFAIIM-GMSNPAVSRLSQTWE-----  
 -----KLPTKFKKFYAE-FESMM-----DPSRNH-----  
 -RTYRI---TVTK-----LEPPII-PFMP-----  
 LLLKDMFTFHEGKN--TF-ID-----N-MVNFE-KM-----  
 -----RI--IANTIRQVRHCRS--Q-----PFNPD--  
 -I-----CQPNKNQ---A-----EVRG-----YV-----  
 RKLCVIDNQRAL-----TQLSYRL-----  
 -----EPRR-----T-----

```
>Rapgef4 [Ovis aries musimon] 803230360
```

-----EANTVRLKEHDQDVLVLEK-----VPA-GNRASNQG  
NS---QP-QQ-----K-YTVMMSGTPEKI  
LEHFLET-----IRLEP-ALN-----EA-----TDSVLN---D-  
FVMMHCV--FM-----PNTQLCPALV-----A-  
-----H-----Y-----HAQPSQ--GTEQEKMDYALNNKRRVIRLVLQ  
WAAMYGDILQED-DVAMAFLE---EFYVS--VSDDA--RMLAALK--EQ-LPELEKIV  
KQI---SED--AK-----APQKK-----  
---HKV-----LLQQFNTGD-ERAQ-KRQ-----



```
NS---QP-QQ-----K-YTVMMSGTPEKI  
LEHFLET-----IRLEP-ALN-----EA-----TDSVLN---D-  
FVMMHCV--FM-----PNTQLCPALV----A-----  
-----H-----Y-----HAQPSQ--GTEQEKM DYALNNKRRVIRLVLQ  
WAAMYGDILQED-DVAMAFLE---EFYVS--VSDDA--RMLAALK--EQ-LPELEKIV  
KQI--SED-AK-----APQKK-----  
---HKV-----LLQQFNTGD-ERAQ-KRQ-----  
  
-----PIRGSD E--VL-----FK-----  
VYCLDH TYTTIRVPVAASVKEVLS-----AVADK-----LGSG-EG--LI I  
VKMSSG-----GEKV V-----LKPNDVSVFTTLTINGRLFAC  
PREQ--F-DSL T-PLPEQ-----EGP-----TVGTM  
GT--FEL MSSKD LAY QMTI YDWEL FNCVHELELIY-----HTFGRHHF-KK-TTANLD  
LFLRR-----FNEIQFWV----VTEIC LCSQPSKR-----VQLLK KFI KIAAH-  
-----CKEYKNL NSFFAIVM-GLSNVAVSRLALTWE-----  
-----KLPSKF KKFYAE-FESLM-----DPSRNH---  
-RAYRL---TVAK-----LDPPLI-PFMP-----  
LLIKDMTF THEGNK--TF-ID-----N-LVNFE-KM  
-----RM---IANTARTVRYCRS--Q-----PFNPD--  
-A-----AQANKNH---Q-----DVRS-----YV  
RQLNVIDNQRTL-----SQMSHRL  
  
-----EPRR-----P-----  
  
---  
>Rapgef4_[Panthera tigris altaica]_987393874  
-----M-----  
  
-----R-PSLPGRAVN-C  
SASSRR--TSRLYG--R-N-----IDSTWQD-----  
-----C-----W-----  
-----LLLM--VLWKRAL-TMT-----TPLIEPHVPLRP--  
--ANTITKVPSEKIL--RA-----GKILR-NAILSRA  
PH-M-----IRDRKYH-----L-KTY-----RQC-CV  
GT-----ELVDWMLQQT-----  
---PCVH-----SRTQAVGMW--QVLVEDGVLN--  
-----H-----VDQ-EHHFQDKY-LFYRFLDD  
-----EHED--AP-L-----  
-----P-----
```

[illegible]

```
-----N-----T-----  
-----PLIEPHVPLRPAN-TITK-----VPS-----  
-----EKIL-----RA-----GKILR-NAILSRA  
PH-M-----IRDRKYH-----L-KTY-----RQC-CV  
GT-----ELVDWMMQQT-----  
---PCVH-----SRTQAVGMW---QVLLEDGVLN-  
-----H-----VDQ-EHHFQDKY-LFYRFLDD  
-----EHED---AP-L-----  
-----PT  
EEEE--KECDEEL----QDTMLLLSQMGPDAH-----MRMILRKPPGQRT  
VDDLE-----IIYEELLHIKALSHLS-TTVKRELA-GVLIFESHAKGGTVL-----  
-----FNQGEEG--TSWYIIL  
KGSVNVIYGK-----GV-----VCTLHEG-DDF  
GKLAL-----VNDAPRA--ASIVLREDNCHFRLRVKD EDFNR-----ILRD--  
-----V-----  
  
-----EANTVRLKEHDQDVLVLEK----VPA-GNRASNQG  
NS---QP-QQ-----K-YTVMMSGTPEKI  
LEHFLET-----IRLEA-TLN-----EA----TDSVLN---D-  
FIMMHCV--FM-----PNTQLCPALV-----A-----  
-----H-----Y-----HAQPSQ---GTEQEKM DYALNNKRRVIRLVLO  
WAAMYGDLLQED-DVSMAFLE---EFYVS--VSDDA--RMIAALK---EQ-LPELEKIV  
KQI---SED--AK-----APQKK-----  
---HKV-----LLQQFNTGD-ERAQ-KRQ-----  
  
-----PIRGSD--VL-----FK-----  
VYCMDHTYT TIRVPVAASVKEVIS-----AVADK-----LGSG-EG--LI I  
VKMSSG-----GEKV V-----LKPNDVSVFTTLTINGRLFAC  
PREQ--F-DSL T-PLPEQ-----EGP-----TIGTV  
GT--FEL MSSKDLAYQMTIYDWEL FNCVHELELIY-----HTFGRHNF-KK-TTANLD  
LFLRR-----FNEIQFWV----VTEIC LCSQLSKR-----VQLLK KFIKIAAH  
-----CKEYKNL NSFFAIVM-GLSNVAVSRLALTWE-----  
-----KLPSKF KK FYAE-FESLM-----DPSRNH--  
-RAYRL---TVAK-----LEPPLI-PFMP-----  
LLIKDMTF THEGNK--TF-ID-----N-LVNFE-KM  
-----RM---IANTARTVRYRS--Q-----PFNPD--  
-A-----AQANKNH-----Q-----DVRS-----YV  
RQLNVIDNQRTL-----SQMSHRL  
-----EPRR-----P-----
```

-----  
---  
>Rapgef4\_[Parasteatoda\_tepidariorum]\_1009531414  
-----MVTE-----  
---WAHV---MDK-----RPAD----RTEEELEILYNRLRSIEAFEKYHPTLL  
QQMCCFGY--YEDLD--KGVTLFRQGDKGTNMYAVLAGSLDVQVLQTS-PEQDT-----  
-----VTLCTLGIGTAFGESILDNS-PHSATVV-TNEHCELLRIEQRDFKTIWERN---  
--KH--LMEDIV-----SPISTLRSLT-----  
GLPRQDECKASNGNIRSITPLGKK-ESLTPDGPNP-----  
-----  
-----ALP-----IT-----  
---QEPSSTLS-----RA-----GWVLR-TLILSQS  
PH-L-----IRDRKYH-----V-RTF-----RKC-LV  
GS-----EMVDWLMQQG-----  
GSYVRIH-----SRSQAVGMW---QALMEEGVIS-----  
-----H-----VTN-EHQFKDKY-LFYRFRED  
-----QIDS---GS-F-----  
-----PS  
ADDR--QQAEL-EL-----AETLAILLQLAPDAI-----FRMILRKPSCERT  
EEDLE-----IIYEELLHIKALSHLS-NSVKRELA-GVLVFESHKAGTVL-----  
-----FNQGDEG--KSWFIIL  
KGAVNVVIYGK-----GV-----VCSLHEG-DDF  
GKLAL-----VNDAPRA---ATIVTRENNCHFLRVDKDDFNN-----IIRD--  
-----V-----  
-----  
-----EANTVRLKEHGQDVLLLQK-----IPT----DSRA  
PD--GTHS-HY-----K-YMVMAGTPQKM  
LEHLL-ETRIDQRNED-----AS-----DTFLE---D-  
FLLTHVI--FM-----PSHQLCPELM---R-----  
-----HYRIDATN-----CKQEKEFIIANKKRVLQFVQI  
WATVIREAFFED-ASIASFLQ---ELHDS--VVEDC--KKF--T--LHEE-LSIISRI  
ETK-HKYDKEVIG-----VT-YR-----  
---WKVGPYQGIIRLLSASESQDE-ERTE-FR-----  
-----  
-----R-----  
-----  
-----  
-----  
-----CIKYSDE--VV-----FR-----  
VYCADHTYTTIKTGVGATAEAIKR-----SAAEK-----LGFK-DE--LLL  
VEVKST-----SERVI-----FKDSEVSVPTGLSVNGRIFLT  
PSDQ---V-DLLT-PLPEQ-----EGP-----QDGTG  
AI--LETNLSDIAYGMTIYEWDLFSCVHEYELIY-----QVFGRHQF-RK-IMSNLD  
VFLRR-----FNEIQHWV-----VTEMLVCNNLSRR-----VALLRKFIKIAAH-  
-----CREHQNMNSFFAIVM-GLSNVAVSRMTQTWE-----  
-----KLPSKLRKFSE-FEALI-----DPSRNH---  
-RRYRL---TVSK-----MVPPII-PFMP-----  
LLLKDMTFSHEGNK--TY-ME-----G-LLNFE-KM  
-----HM---IAQSLRTIRHCRS--Q-----PLELDP-  
-P-----PG-NKPQ---Q-----DVRN-----YI  
RNLRIIDNQKRL-----TQLSDVL  
-----EPRR-----TA-----

-----MVAA-----HA-----SH-----SSS  
SGEWIA--CLDK-----RPLE-----RSSDVDIIIFTRLKEVKAFEKFHPNLL  
QQICLCGY--YENLE--KGITLFRQGDIGTNWYAVLTGSLDVKVSD-TSNHQDA-----  
-----VTICTLGIGTAFGESILDNT-PRHATIV-TREHSELL-----  
-----RIEQKD-----FKALW--EKYRQYMSG-L  
LTPPYG--VMETGS--N-N-----DRMPDKD-----  
-----SMS-----SSALCQVSKNCNKT-----  
-----PLIEPYIPHHPTK-TITQ-----VPS-----  
-----EKIL-----RA-----GKILR-NTILSRA  
PH-M-----IRDRKYH-----L-KTY-----RQC-CV  
GT-----ELVDWMMQQS-----  
---PCVH-----LRTQAVGMW--QVLLEEGVLN-----  
-----H-----VDQ-EHHFQDKY-LFYRFLDD  
-----ERED--AP-L-----  
-----PT  
EEEE--KECDEEL-----QDTMLLLSQIGPDAH-----MRMILRKPPGQRT  
VDDLE----FIYEELLHIKALSHLS-TTVKRELA-GVLIFESHKAGTVL-----  
-----FNQGEEG--TSWYIIL  
KGSVNVIYIGK----GV-----VCTLHEG-DDF  
GKLAL-----VNDAPRA--ASIVLREDNCHFRLVDKEDFNR-----ILRD-----  
-----V-----  
-----  
-----EANTVRLKEHDQDVLVLEK----IPA-GNRISNQG  
NP---QP-QH-----K-YIVMSGTPEKI  
LEHFLET-----MRLEA-TLN-----EA-----TDSVLN---D-  
FIMMHCV--FM-----PNSQLCPALM-----A-----  
-----H-----Y-----HAQPSQ--GTEQEKMDYALNNKRRVIRLVLQ  
WAALYGDLLQED-EAAMAFLE---EFYVS--VSDDT--RMIAALK--EQ-LPELEKIV  
KQI---SEE--PK-----APQKK-----  
---HKV-----LLQLFNTSD-DRAQ-KRQ-----  
-----  
-----  
-----  
-----  
-----PIRGSDE--VL-----FK-----  
VYCIDQTYTTIRVPVSSSVKEVIS-----AVADK-----LGSG-EG--LII  
VKMSSG-----GEKV-----LKPHDVSFVTTLSVNGRLFAC  
PRDQ--F-DSLA-PLPEQ-----EGP-----STGTI  
GT--FELMSSKDLAHQMTIYDWELFNCVHELELIY-----HTFGRHNF-KK-TTANLD





[illegible]





```

-----N-----KT-----
-----PLIEPHIPHRPTK-TITQ-----VPS-----
-----EKIL-----RA-----GKILR-NTILSRA
PH-M-----IRDRKYH-----L-KTY-----RQC-CV
GT-----ELVDWMMQQS-----
---PCVH-----SRTQAVGMW---QVLLEEGVLN-----
-----H-----VDQ-EHHFQDKY-LFYRFLDD
-----ERED---AP-L-----
-----PT
EEEE--KECDEEL---QDTMLLLSQIGPDAH-----MRMILRKPPGQRT
VDDLE----IIYEELLHIKALSHLS-TTVKRELA-GVLIFESHPKAGTVL-----
-----FNQGEEG--TSWYIIL
KGSVNVVIYGK---GV-----VCTLHEG-DDF
GKLAL-----VNDAPRA--ASIVLREDNCHFRLVDKEDFNR-----ILRD--
-----V-----
-----EANTVRLKEHDQDVLVLEK----IPA-GNRVSNQG
NS---QP-QH-----K-YIVMSGTPEKI
LEHFLET-----MRPEA-TLN-----EG---TDSVLS---D-
FIMMHCV--FM-----PNSQLCPALM-----A-----
---QYPFLREKHRGTY-----HAQPSQ---GTEQEKMDYALNNKRRVIRLVLQ
WAALYGDLLQED-EAAMAFLE---EFYVS--VSDDT--RMIAALK---EQ-LPELEKIV
KQV---SEE--PK---APQKK-----
---HKV-----LLQLFNTSD-DRSQ-KRQ-----
-----PIRGSDE--VL-----FK-----
VYCIDQTYTTIRVPVSSSVKEVIS-----AVADK-----LGSG-EG--LII
VKMSSG-----GEKVV-----LKPHDVSFVFTTILSVNGRLFAC
PRDQ--F-DSLA-PLPEQ-----EGP-----STGTV
GT--FELMSSKDLAHQMTIYDWELFNCVHELELIY-----HTFGRHNF-KK-TTANLD
LFLRR-----FNEIQFWV----VTEICLCSQLSKR-----VQLLKKYIKIAAH
-----CKEYKNLNSFFAIIM-GLSNVAVSRLSLTWE-----
-----KLPSKFKKIYAE-FESLM-----DPSRNH---
-RAYRL---TVAK-----LDPPII-PFMP-----
LLIKDMFTFHEGKN--TF-TD-----N-LVNFE-KM

```

-----  
---  
>Rapgef4\_[Physeter\_catodon]\_593753582  
-----M-----  
-----  
-----  
-----PY---QKYRQYMAG-L  
LAPPYG--VMETGS--N-N-----DRIPDKE-----  
-----N-----T-----  
-----PLIEPHVPLRPAN-TITK-----VPS-----  
-----EKIL-----RA-----GKILR-NAILSRA  
PH-M-----IRDRKYH-----L-KTY-----RQC-CV  
GT-----ELVDWMLQQT-----  
---PCVH-----SRIQAVGMW---QVLVEDSVLN-----  
-----H-----VDQ-EHHFQDKY-LFYRFLDD  
-----EHED---AP-L-----  
-----PT  
EEEE--KECDEEL-----QDTMLLSQMGPDAH-----MRMILRKPPGQRT  
VDDLE-----IIYEELLHIKALSHLS-TTVKRELA-GVLIFESHAKGGTVL-----  
-----FNQGEEG--TSWYIIL  
KGSVNVVIYGK-----GV-----VCTLHEG-DDF  
GKLAL-----VNDAPRA---ASIVLREDNCHFLRVDKEDFNR-----ILRD--  
-----V-----  
-----  
-----EANTVRLKEHDQDVLVLEK-----VPA-GNRASNQG  
NS----QP-QQ-----K-YTVMSGTPEKI  
LEHFLET-----IRLEP-ALN-----EA-----TDSILN---D-  
FVMMHCV--FM-----PNTQLCPALV---A-----  
-----H-----Y-----HAQPSQ---GTEQEKM DYALNNKRRVIRLVLQ  
WAAMYGDVLQED-DVALAFLE---EFYVS--VSDDA--RMIAALK---EQ-LPELEKIV  
KQI---SED--AK-----APQKK-----  
---HKV-----LLQQFNTGD-ERAQ-KRQ-----  
-----  
-----  
-----  
-----  
-----PIRGSDE--VL-----FK-----  
VYCMDHTYTTIRVPVAASVKEVLS-----AVADK-----LGSG-EG--LII  
IKMSSG-----GEKVV-----LKPNDVSVFTTLTINGRLFAC  
PREK---F-DSLT-PLPEQ-----EGP-----TVGTM  
GT--FELMSSKDLAYQMTVYDWDLFSCVHELELIY-----HTFGRHHF-KK-TTANLD  
LFLRR-----FNEIQFWV-----VTEICLCSQPSKR-----VQLLKKFIKIAAH-  
-----CKEYKNLNSFFAIVM-GLSNVAVSRLALTWE-----  
-----KLPSKFKKFYAE-FESLM-----DPSRNH---  
-RAYRL---TVAK-----LDPPLI-PFMP-----  
LLIKDMFTTHEGNK--TF-ID-----N-LVNFE-KM  
-----RM---IANTARTVRYCRS--Q-----PFNPD--  
-A-----AQANKNH---Q-----DVRs-----YV  
RQLNVIDNQRTL-----SQMSHRL  
-----EPRR-----P-----









SS---AA-HH-----K-YNIMSGTPEKI  
LEHLLEM-----MRSDS-QFT-----ES-----DSALD---D-  
FVLTHCV--FI-----PNSRLCPVLS----D-----  
-----H-----Y-----HAQASQ--DSEMEKLDYTLLNNKRRVIRLVMK  
WAAVHGHEHLQQQ--DMV--FLE---EFLVA--VSEDA--KVLPALR--DQ-LTELEKII  
KSS---ADD--AR-----SSQRK-----  
---HKV-----LLQHFNMV D-EKLQ-KRQ-----  
  
-----  
  
-----PIKGDDE--IL-----FK-----  
VYCCDHITYTTIRVPVASSVREVLE-----AVADK-----LGSA-ED--LIL  
VGLSSA-----GEKV V-----FKPN DVSI FSTLSINGRLFAC  
QRDQ--L-DVLV-PLSEQ-----EGP-----SLGSL  
AN--FELMSSKD VAYHMTFYDWELFHCVHELELIY-----HTFGRQH V-KK-TTVNLD  
LFLQR-----FNEIQFWV-----ITEVCLCSQLNKR-----VQLLK KFI KIAAH-  
-----CKEYKNLN AFFAVIL-GLSHPAVSRLSQ TWE-----  
-----KLPSKFKKFYGE-FENLM-----DPSRNH---  
-RAYRL---TVAK-----LAPPVI-PFMP-----  
LMIKDMTF THEGNK--TF-ID-----N-LVNFE-KM  
-----RM---IAKT VKTVRYFRS--Q-----TFSPD--  
-S-----PQAGKHH---P-----DVWT---YV  
RQLSVIDNQRTL-----TQLSHGL  
-----EPRR-----S-----  
  
-----  
  
---

>Rapgef4\_[Poecilia\_reticulata]\_658838439

-----  
  
-----MAG-L  
LAPPYG--VME--S--S-AS-----DRMPEKE-----  
-----NMS-----SNSFASVSKHPNKK-----  
-----SFPE SP--AKLH-TKRPT-----QVPS-----  
-----EKIL-----QA-----GKILR-HAILSRA  
PH-M-----IRDRKYH-----L-KTY-----RQC-CV  
GT-----ELVDWQMLQS-----  
---SCVH-----SRIQAVGMW--QVLLEEGVLN-----  
-----H-----VDG-ETVFQDKY-LFYRFLDD  
-----EQED--AL-I-----P-----

```
EEER--RKSQEEL-----QDTLLFLSQIGPDAL-----MRMILRKPPSERT  
PDDLE-----IIYEELLHIKALSHLS-TTVKRELA-GVLIFESHERAGTVL-----  
-----FHQGEEG--TSWYIIL  
KGSVNVVIYGK----GV-----VCTLHEG-DDF  
GKLAL-----VNDAPRA---ASIVLREDDCHFRLVDKEDFN-----ILRD--  
-----V-----  
  
-----EANTVRLKEHGQDVLVLEK-----SLS-SSRNSVQG  
SS---AA-HH-----K-YNIMSGTPEK  
LEHLLEM-----MRSDS-QFT-----ES-----DSALD---D-  
FVLTHCV--FI-----PNSRLCPVLS---D-  
-----H-----Y-----HAQASQ--GSEMEKLDYTLNNKRRVIRLVMK  
WAAVHGEHLQQQ-DMV--FLE---EFFVA--VSEDA--KVLPALR--DQ-LTELEKII  
KSS---ADD--AR-----SSQRK-  
---HKV-----LLQHFSMVD-EKLQ-KRQ-----  
  
-----PIKGDDE--IL-----FK-----  
VYCCDHITYTTIRVPVASSVREVLE-----AVADK-----LGSA-ED--LIL  
VGLSSA-----GEKVV-----FKPNDVSIFSTLSINGRLFAC  
QRXQ--L-DVLM-PLSEQ-----EGP-----SXGSL  
AN--FELMSSKDVAYHMTFYDWELFHCVELELIY-----HTFGRQHV-KK-TTVNLD  
LFLQR-----FNEIQLWV-----ITEVCLCSQLSKR-----VQLLKFKIKIAAH-  
-----CKEYKNLNAFFAVIM-GLSHPAVSRLSQTWE-----  
-----KLPSKFKKFYGE-FESLM-----DPSRNH--  
-RAYRL---TVAK-----LTTPVI-PFMP-----  
LMIKDMTFTHEGNK--TF-ID-----N-LVNFE-KM  
-----RM--MAKTVKTVRYCRS--Q-----TFNPD--  
-S-----PQAGKHH-----P-----DVWT-----YV  
RQLSVIDNQRTL-----TQLSHGL  
-----EPRR-----S-----  
  
-----  
>Rapgef4_[Pongo_abelii]_686709095  
  
-----MAG-I  
LAPPYG--VMETGS--N-N-----DRIPDKE-----
```

-----N-----  
-----VPS-----  
-----EKIL-----RA-----GKILR-NAILSRA  
PH-M-----IRDRKYH-----L-KTY-----RQC-CV  
GT-----ELVDWMMQQT-----  
---PCVH-----SRTQAVGMW---QVLLEDGVLN-  
-----H-----VDQ-EHHFQDKY-LFYRFLDD  
-----ENED---AP-L-----  
-----PT  
EEEE--KECDEEL----QDTMLLLSQMGPDAAH-----MRMILRKPPGQRT  
VDDLE----IIYEELLHIKALSHLS-TTVKRELA-GVLIFESHAKGGTVL-----  
-----FNQGEEG--TSWYIIL  
KGSVNVIYGK---GV-----VCTLHEG-DDF  
GKLAL-----VNDAPRA--ASIVLREDNCHFRLRVKDKNR-----ILRD--  
-----V-----  
  
-----EANTVRLKEHDQDVLVLEK----VPA-GNRASNQG  
NS---QP-QQ-----K-YTVMSTGTPSKI  
LEHFLET-----IRLEA-TLN-----EA---TDSVLN---D-  
FIMMHCV--FM-----PNTQLCPALV-----A-----  
-----H-----Y-----HAQPSQ---GTEQEKM DYALNNKRRVIRLVLO  
WAAMYGDLLQED-DVSMAFLE---EFYVS--VSDDA--RMIAALK---EQ-LPELEKIV  
KQI---SED--AK-----APQKK-----  
---HKV-----LLQQFNTGD-ERAQ-KRQ-----  
  
  
  
-----PIRGSD--VL-----FK-----  
VYCMDHTYTTRVPVAASVKEVIS-----AVADK-----LGSG-EG--LIV  
VKMSSG-----GEKV-----LKPNDVSVFTTLTINGRLFAC  
PREQ--F-DSL T-PLPEQ-----EGP-----TVGTV  
GT--FELMSSKDLAYQMTIYWELFNVCHELELIY-----HTFGRHNF-KK-TTANLD  
LFLRR-----FNEIQFWV-----VTEICLCSQLSKR-----VQLLKFKFIKIAAH  
-----CKEYKNLNSFFAIAM-GLSNVAVSRLALTWE-----  
-----KLPSKFKKFYAE-FESLM-----DPSRNH---  
-RAYRL---TVAK-----LEPPVI-PFMP-----  
LLIKDMFTTHEGNK--TF-ID-----N-LVNFE-KM  
-----RM---IANTARTVRYRS--Q-----PFNPD--  
-A-----AQANKNH---Q-----DVWS---YV  
RQLNVIDNQRTL-----SQMSHRL  
-----EP RR-----P-----

-----  
---  
>Rapgef4\_[Priapulus\_caudatus]\_957848036  
-----MIAAYSANSN-----SSIN-----  
---WIQC---LDK-----RPSD----RSEDLEIIYTRLKNVKA FEKLNPM LL  
QQICYGY--YEDLE--KGVVLYRQGD LGTNWYTVLAGTLDVNVSE-TGHTDDS-----  
-----VTVCTFGIGIAFGESVLDNS-PRHATVV-TSDYCELLRVEEKDFRLLWEQN---  
--RE--FMEGVLSQLSGPLAELGL-----  
-----  
-----EKLNI-----  
-----EPQLP-----ARRPEHA---AS-----VNPALP-----IT-----  
---QEPSEKLS-----RA-----GKVLR-TVLLSRA  
PT-M-----IRDRKFH-----L-RTY-----RRC-MV  
AS-----DMVDWLLQQS-----  
---TVVH-----SRQAVGMW---QALLEEGVVA-----  
-----H-----VSH-EHQFKDKY-LFYRFRED  
-----DLGI---ST-V-----  
-----PT  
SAEK--KESEDEL-----PETLNLLSQIGPDSM-----LRMILRKTPQERT  
ADDLE-----IIYEELLHIKALSHLS-TMVKRELA-SVLVFESH AHAGEVL-----  
-----FNQGDEG--KSWYIIL  
KGSVNVVIY GK-----GV-----VCTLHEG-DDF  
GKLAL-----VNDAPRA---ASIVLRENNCHFLRVDKDDFNR-----ILRD--  
-----V-----  
-----  
-----EANTVRLKEHGQDVLILEK-----IAAGGGGG-GGG  
GS----QP-HY-----K-YSVMAGTPDKM  
LEHLLLETRL-GAAADDQS-----DTYLQ---D-  
FLITYVI--FM-----PSGVLCPALM---Q-----  
-----HYHTTANHGD DDTAGGATDG-----G---NQEDPVALILANKKRVIEFVQQ  
WFNTAGDAFKED-QTIRAFLE----ELYHS--VLVDC--QSYTLLR---EQ-LTVLNGII  
N----GINDKAQE-----DK-----  
---SSRRSRGMPGTSIKKTKE---DKSA-AHQTYKSADYNIF-----  
-----  
-----  
-----  
-----  
-----K-----  
VYCADHTYSTLKMRV DATAGQIVH-----VAREK-----LCLG-ED--LQL  
VEVKST-----GERVV-----FKEEEVSVTTGLSVNGRLFIA  
PREH---L-DSLT-PLPEQ-----DGP-----STSTC  
SQ--LELMNSRDIAYQLAVFDWDLFTCVHKFELIY-----HVFGRDKF-GK-IMSNLD  
VFLRR-----FNEVQYWV-----VTELCLTPTVSKR-----VQLLRKYIKVAAH-  
-----CKEYQDLNSFFAIVM-GLSNIAISRLSQTWE-----  
-----KLPGKFKKMFAE-FEALM-----DPSRNH---  
-RVYRL---AVAK-----MSPPIV-PFMP-----  
LLMKDMFTTHEGNK--TY-FE-----A-LINFE-KM  
-----HM---IAQTIRTIQYCRS--K-----PFRIEQ-  
-P-----SS-LKNT---T-----DVRT-----YI  
RNLKVIDNQRR L-----TQLSHKL  
-----EPRR-----S-----



LFLRR-----FNEIQFVW----VTEICLCSQLSKR-----VQLLKKFIKIAAH-  
-----CKEYKNLNSFFALIM-GLSNVAVSRLTMTWE-----  
-----KLPSKFKKIYAE-FESLM-----DPSRHH-----  
-RAYRL---TVAK-----LEPPII-PFMP-----  
LLIKDMTFTYEGNK--TF-ID-----N-LVNFE-KM  
-----RM--ISNTIKTVRFCSR--L-----PFNPD--  
-A-----SQANKNH---Q-----DLRG-----YV  
RQLNVIDNQRTL-----SQMSHRL-----  
-----EPRR-----T-----

```
>Rapgef4 [Pseudopodoces humilis] 929420255
```

-----EANTVRLKEHDQDVLVLEK-----IPA-GNRISNQG  
NP---QP-QH-----K-YIVMSGTPEKI  
LEHFLET-----MRLEA-TLN-----EA-----TDSVLN---D-  
FIMMHCV--FM-----PNSQLCPALM-----A-----  
-----H-----Y-----HAQPSQ--GTEQEKMDYALNNKRRVIRLVLQ  
WAALYGDLLQED-EAAMAFLE---EFYVS--VSDDT--RMIAALK--EQ-LPELEKIV  
KQI---SEE--PK-----APQKK-----  
---HKV-----LLQLFNTSD-DRAQ-KRQ-----





[illegible]

```

EEEE--KECDEEL-----QDTMLLSQTGPDAH-----MRMILRKPPGQRT
VDDLE-----IIYEELLHIKALSHLS-TTVKRELA-GVLIFESHAKGGTVL-----
-----FNQGEEG--TSWYIIL
KGSVNVIYGK----GV-----VCTLHEG-DDF
GKLAL-----VNDAPRA---ASIVLREDNCHFLRVDKEDFNR-----ILRD--
-----V-
-----
-----EANTVRLKEHDQDVLVLEK-----VPA-GNRAPNQG
NS---QP-QQ-----K-YTVMSTPEK
LEHFLET-----IRLEP-ALN-----EA-----TDSILN---D-
FVMMHCV--FM-----PNTQLCPALV-----A-
-----H-----Y-----HAQPSQ--GTEQEKMDYALNNKRRVIRLVLO
WAAMYGDVLQED-DVAMAFLE---EFYVS--VSDDA--RMITAFK--EQ-LPELEKIV
KQI---SED-AK-----NPQKK-----
---HKV-----LLQQFNTGD-ERAQ-KHQ-----
-----
-----PIRGSD--VL-----FK-----
VYCMDHTYTTRVPVAASVKEVIS-----AVADK-----LGSG-EG--LI I
VKMSSA-----GEKV-----LKPNDVSVFTTLTINGRLFAC
PREQ---F-DSL T-PLPEQ-----EGP-----TVGTV
GT--FELMSSKD LAYQMTIYDWELFNCVHELELIY-----HTFGRHNF-KK-TTANLD
LFLRR-----FNEIQFWV-----VTEIC LCSQPSKR-----VQLLK KFIKIAAH
-----CKEYKNLNSFFAIVM-GLSNVAVSRLALTWE-----
-----KLPSKFKKFYAE-FESLM-----DPSRNH--
-RAYRL---TVAK-----LEPPLI-PFMP-----
LLIKDMTFTHEGNK--TF-ID-----N-LVNFE-KM
-----RM---IANTARTVRYCRS--Q-----PFNLD--
-A-----AQANKNH---Q-----DVR S-----YV
RQLNVIDNQRTL-----SQMSHRL
-----EP RR-----P-----
-----
-----
>Rapgef4_[Pundamilia_nyererei]_548336931
-----
-----MESGS---NN-----DRITDKD-----

```

-----NMN-----S-----  
-----DSA---NKAH-----N-----KIPS-----  
-----EKLQ-----RA-----GKVLN-NAILSRA  
PH-M-----IRDRKYH-----L-KTY-----RQC-CV  
GT-----ELVDWLVLQS-----  
---ACVL-----TRSHAVGMW---QALLEEGVLN-----  
-----H-----VDQ-ELGFYDKY-LFYRFLDD  
-----EDED---TP-L-----  
-----PS  
EEEE--RESEEEEL-----PETILFLAQIGPDAL-----LRMILRKSPGQRT  
GDDLE-----IIYDELLHIKALAHLS-NTVKRELA-SVVIFESHAKAGTVL-----  
-----FNQGEEG--TSWYIIL  
KGSVNVVIYKG-----GV-----VCTLHEG-DDF  
GKLAL-----VTDSPRA---ASIVLREDNCHFLRVDKEDFNR-----ILRD--  
-----V-----  
-----  
-----EANTVRLKEHDHPVLVLEK-----S---PRASTLG  
N-----I-----K-YTVISGTPEKI  
LEHFLET-----MRMDI-HHS-----DP-----DPAVD---D-  
FVLMHCV--FM-----PNSQLCPLLL-----S-----  
-----Q-----Y-----HVTSP---GSEQERLEYALNSKRRALIMTLR  
WANAHTYLLQEE-PAAIFFLE---ELYGS--LSNDS--RMLRALK---DL-VPDLEKVV  
KLH---SEE--AK-----ATKKK-----  
-----T-----LIRQFSNGE-ERLQ-KKQ-----  
-----  
-----  
-----  
-----  
-----PIRNQDD--IL-----LK-----  
VYCSDHYYTTIRIPVAATGREVIS-----AVTDK-----LGTT-DE--LLL  
VHLSSA-----GEKQI-----LKPNDVSVFSTLSINGRLFAC  
PREQ---L-NSLT-PLPDQ-----EGP-----TAGSM  
ST--FELMSSKDLAYQMTMFDWELFSCVHEHELLY-----HTFGCQSF-KR-TTANLD  
LFLRR-----FNQVQLWV-----VTEVCLCGQLSKR-----VQLLKKFIKIAAH-  
-----CREFKNLNSFFAIIM-GMSNPAVSRLSQTWE-----  
-----KLPTKFKKFYAE-FENMM-----DPSRNH--  
-RSYRL---TVTK-----LEPPII-PFVP-----  
LLLKDMFTTHEGNK--TF-ID-----N-MINFE-KM  
-----RI---IANTIRQVRHCRS--Q-----PFNPD--  
-I-----CQPNKNQ---A-----EVRA-----YV  
RKLCVIDNQRAL-----TQLSYRL  
-----EPRR-----T-----  
-----  
-----  
-----  
-----  
-----  
-----  
-----  
-----  
-----

-----  
---  
>Rapgef4\_[Pygoscelis\_adeliae]\_679131078  
-----  
-----RPLE-----RSSEDVDIIFTRLKEVKAFEKFHPNLL  
QQICLCGY--YENLE--KGITLFRQGDIGTNWYAVLTGSLDVKVSD-TSNHQDA-----  
-----VTICTLGIGTAFGESILDNT-PRHATIV-TREYSELL-----  
-----RIEQKD-----FKALW---EKYRQYMSG-L  
LTPPYG--VMEASS--N-N-----DSKYEKI-----  
-----D-----T-----  
-----PLIEPHIPHRPTK-TITQ-----VPS-----  
-----EKIL-----RA-----GKILR-NTILSRA  
PH-M-----IRDRKYH-----L-KTY-----RQC-CV  
GT-----ELVDWMMQQS-----  
---TCVH-----SRTQAVGMW---QVLLEEGVLN-----  
-----H-----VDQ-EHHFQDKY-LFYRFLDD  
-----ERED---AP-L-----  
-----PT  
EEEE--KECDEEL-----QDTMLLSQIGPDAH-----MRMILRKPPGQRT  
VDDLE-----IIYEELLHIKALSHLS-TTVKRELA-GVLVFESHKAGTVL-----  
-----FNQGEEG--TSWYIIL  
KGSVNVVIYGK----GV-----VCTLHEG-DDF  
GKLAL-----VNDAPRA---ASIVLREDNCHFLRVDKEDFNR-----ILRD--  
-----V-----  
-----  
-----EANTVRLKEHDQDVLVLEK-----VPA-GNRVSNQG  
NS---QP-QH-----K-YIVMSGTPEKI  
LEHFLET-----MRPEA-TLN-----EA-----TDSVLN---D-  
FIMMHCV--FM-----PNSQLCPALM---A-----  
-----QYPF---HRGTY-----HAQPSQ---GTEQEKMDYALNNKRRVIRLVLQ  
WAALYGDLLQED-EAAMAFLE---EFYVS--VSDDT--RMIAALK---EQ-LPELEKIV  
KQV---SEE--SK-----APQKK-----  
---HKV-----LLQLFNTSD-DRAQ-KRQ-----  
-----  
-----  
-----  
-----  
-----PIRGSDE--VL-----FK-----  
VYCIDQTYTTIRVPVSSSVKEVIS-----AVADK-----LGSG-EG--LII  
VKMSSG-----GEKVV-----LKPHDVSFVTTLSVNGRLFAC  
PRDQ---F-DSLA-PLPEQ-----EGP-----STGTV  
GT--FELMSSKDLAQMTIYDWELFNCVHELELIY-----HTFGRHNF-KK-TTANLD  
LFLRR-----FNEIQFWV-----VTEICLCSQLSKR-----VQLLKYYIKIAAH-  
-----CKEYKNLNSFFAIIM-GLSNVAVSRLSLTWE-----  
-----KLPSKFKKIYAE-FESLM-----DPSRNH---  
-RAYRL---TVAK-----LDPPII-PFMP-----  
LLIKDMFTTHEGNK--TF-TD-----N-LVNFE-KM  
-----RM---IANTVRTVKFCRS--Q-----SFNPD--  
-A-----ALTNKNH---Q-----DVRs-----YV  
RQLNVIDNQRTL-----SHMSHRL  
-----ELRR-----A-----



```
-----  
-----  
-----  
-----  
-----  
-----  
-----  
-----  
-----  
-----  
-----  
-----  
-----  
-----  
-----  
-----  
-----  
  
----  
>Rapgef4_[Rattus_norvegicus]_293346052  
-----MVAA-----HA-----AH-----SPS  
SAEWIA---CLDK-----RPLE-----RSSEDVDIIIFTRLKGVKAFAFERFHPNLL  
RQICLCSY--YENLE--KGITLFRQGDIGTNWYAFLAGSLDVKVSE-TSSHQDA-----  
-----VTICTLGIGTAFGESILDNT-PRHATIV-TRENSELL-----  
-----RIEQED-----FKALW--EKYRQYMAG-L  
LAPPYG--VMETGS--N-N-----DRIPDKE-----  
-----N-----T-----  
-----PLIEPHVPLRPAH-TITK-----VPS-----  
-----EKIL-----RA-----GKILR-IAILSRA  
PH-M-----IRDRKYH-----L-KTY-----RQC-CV  
GT-----ELVDWMIQQT-----  
---SCVH-----SRTQAVGMW--QVLLEDGVLN-----  
-----H-----VDQ-ERHFQDKY-LFYRFLDD  
-----EHED--AP-L-----  
-----PT  
EEEE--KECDEEL-----QDTMILLSQMGPDAH-----MMILRKPPPGQRT  
ADDLE-----IIYDELHLHIKALSHLS-TTVKRELA-GVLIFESHAKGGTVL-----  
-----FNQGEEG--TSWYIIL  
KGSVNVIYVK-----GV-----VCTLHEG-DDF  
GKLAL-----VNDAPRA--ASIVLREDNCHFRLVDKEDFNR-----ILRD--  
-----V-----  
-----  
-----EANTVRLKEHDQDVLVLEK-----VPA-GNRASNQG  
NS---QP-QQ-----K-YTVMSTPEKI  
LEHFLET-----IRLEP-SLN-----EA-----TDSVLN---D-  
FVMMHCV-FM-----PNTQLCPALV-----A-----  
-----H-----Y-----HAQPSQ--GTEQERMDYALNNKRVRIRLVLO  
WAAMYGDLLQED-DVAMAFLE---EFYVS--VSDDA--RMMVAFK--EQ-LAELEKTV  
KQI---SED-AK-----APQKK-----  
---HKV-----LLQQFNTGD-ERAQ-KRQ-----
```



NS---QP-QQ-----K-YTVMSGTPEKI  
LEHFLET-----IRLEA-TLN-----EA-----TDSVLN---D-  
FIMMHCV--FM-----PNTQLCPALV----A-----  
-----H-----Y-----HAQPSQ--GTEQEKM DYALNNKRRVIRLVLQ  
WAAMYGDLLQED-DVSMAFLE---EFYVS--VSDDA--RMIAALK--EQ-LPELEKIV  
KQI--SED-AK-----APQKK-----  
---HKV-----LLQQFNTGD-ERAQ-KRQ-----  
  
-----  
  
-----PIRGSD E--VL-----FK-----  
VYCMDHTYT TIRVPVAASVKEVIS-----AIADK-----LGSG-EG--LII  
VKMSSG-----GEKV V-----LKPNDVSVFTTLTINGRLFAC  
PREQ--F-DSL T-PLPEQ-----EGP-----TIGTV  
GT--FEL MSSKD LAY QMTI YDWEL FNCVHELELIY-----HTFGRHNF-KK-TTANLD  
LFLRR-----FNEIQFWV----VTEIC LCSQLSKR-----VQLLK KFIKIAAH-  
-----CKEYKNL NSFFAIVM-GLSNVAVSRLALTWE-----  
-----KLPSKF KK FYAE-FESLM-----DPSRNH---  
-RAYRL---TVAK-----LEPPLI-PFMP-----  
LLIKDMTF THEGNK--TF-ID-----N-LVNFE-KM  
-----RM---IANTARTVRYRS-Q-----PFNPD--  
-A-----AQANKNH---Q-----DVRS-----YV  
RQLNVIDNQRTL-----SQMSHRL  
  
-----EPRR-----P-----  
  
-----  
  
-----  
  
-----  
  
-----  
  
-----  
  
-----  
  
---

>Rapgef4\_[Rousettus\_aegyptiacus]\_1012008377

-----  
-----  
-----  
-----  
-----MAG-L  
LAPPYG--VMETGS--N-N-----DRIPDKE-----  
-----N-----  
-----VPS-----  
-----EKIL-----RA-----GKILR-NAILSRA  
PH-M-----IRDRKYH-----L-KTY-----RQC-CV  
GT-----ELVDWMLQQT-----  
---PCVH-----SRTQAVGMW--QVLVEDGV LN-----  
-----H-----VDQ-EHHFQDKY-LFYRFLDD  
-----EHED---AP-L-----P-----



```

EEEE--KECDEEL-----QDTMLLSQTGPDH-----MRMILRKPPGQRT
VDDLE-----IIYEELLHIKALSHLS-TTVKRELA-GVLIFESHAKGGTVL-----
-----FNQGEEG--TSWYIIL
KGSVNVIYGK-----GV-----VCTLHEG-DDF
GKLAL-----VNDAPRA---ASIVLREDNCHFLRVDKEDFNR-----ILRD--
-----V-----
-----EANTVRLKEHDQDVLVLEK-----VPA-GNRAPNQG
NS----QP-QQ-----K-YTVMSTPEK
LEHFLET-----IRLEP-ALN-----EA-----TDSILN---D-
FVMMHCV--FM-----PNTQLCPALV-----A-----
-----H-----Y-----HAQPSQ--GTEQEKM DYALNNKRRVIRLVLO
WAAMYGDVLQED-DVAIAFLE---EFYVS--VSDDA--RMIAAFK---EQ-LPELEKIV
KQI---SED-AK-----NPQKK-----
---HKV-----LLQQFNTGD-ERAQ-KHQ-----
-----PIRGSD--VL-----FK-----
VYCMDHTYTTRVPVAASVKEVIS-----AVADK-----LGSG-ES--LII
VKMSSA-----GEKV-----LKPNDVSVFTTLTINGRLFAC
PREQ---F-DSL T-PLPEQ-----EGP-----TVGTV
GT--FELMSSKD LAYQM TIYDWEL FNCVHELELIY-----HTFGRHNF-KK-TTANLD
LFLRR-----FNEIQFWV-----VTEIC LCSQPSKR-----VQLLK KFIKIAAH
-----CKEYKNLNSFFAIVM-GLSNVAVSRLALTWE-----
-----KLPSKFKKFYAE-FESLM-----DPSRNH---
-RAYRL---TVAK-----LEPPLI-PFMP-----
LLIKDMTFTHEGNK--TF-ID-----N-LVNFE-KM
-----RM---IANTARTVRYCRS--Q-----PFNL D---
-A-----AQANKNH-----Q-----DVRS-----YV
RQLNVIDNQRTL-----SQMSHRL
-----EP RR-----P-----
-----MGTNWYAVLTGTVDVN VSE-TGDPKDA-----
-----ITICTLGVGTAFGESVLSDT-PRHATVI-TTEYCEFLRIEQKDFRSLWERN---
--KQ--FMEGMIN--SNPV PALPSNTAYLQQQEITGSPIT-----
-----PRRAY-----S-----

```

```

-----LD---RGSPALISRDSLNESLEI-----
-----IPKLS-----QSPKPHGEDGFGA-----QHPALP-----LT-----
---DTPSERLA-----RA-----GYVIR-SVILTRS
PH-M-----IRDRKYH-----L-RTY-----RRC-LV
GS-----EMVDWLQVQS-----
---SFVH-----SRNQAVGMW---QALLEEGVIT-----
-----H-----VCH-EHQFKDKY-LFYRFRED
-----DLGI---GT-V-----
-----PT
NNEK--KECEDEL-----QDTLVMLAQISPDAM-----MRMILRKPPPERT
VDDLE-----IIYEELLHIKALSHLS-TMVKRELA-SVLKFESHQKAGTVL-----
-----FNQGDEG--KSWYIIL
RGSVNVVIYGK-----GV-----VCTLHEG-DDF
GKLAL-----VNDAPRA--ASIVLREDNCHFLRVDKDDFNR-----ILRD--
-----V-----
-----
-----EANTVRLKEHGQDVLVLEK-----ILT--NR-GED
GT---PT-HY-----K-YSVMAGTPEKM
LEHLLLEAHI-DKY--NEL-----DTFVE---D-
FLLTHVV--FM-----ESSELCPTLM-----S-----
-----HYHAKASQ-----G---TEQEMADYALNNKRRVIHLVLQ
WSSVAGDDFRED-TTIAAFID-----
-----RKSIPNDENIF-----
-----
-----
-----
-----
-----
-----
-----
-----
-----
-----K-----
VYCADHTYTTTLRLPIDSKASVIAQ-----SAADK-----ICIG-ED--LVL
CEVKST-----GERVV-----IKDNEVGVTTLTSLNGRLFIA
TREH---L-DALT-PIPEQ-----EGP-----SQGTS
SV--FELMSTKEVAYQMTLYDWELLNCLHEYELIY-----HTFGRHKF-GK-ITCNLD
MLLR-----FNEVQFWV-----VTEMCLTNTLGKR-----VQLLRKFIKIAAF-
-----CKEYKNMNSFFSIVM-GLSNIASRSLSQTWE-----
-----KLPSKFKRMFAE-FETTL-----DPSRNH--
-RVYRL---AVAK-----MQPPII-PFMP-----
LLMKDMFTTHEGNK--TY-FD-----G-LVNFE-KM
---HM---IATTIRTIKYCRS--E-----PFKVEP-
-P-----PA-VKNV---Q-----EVRA---YV
RNLSVIDNQRTL-----TQLSHKL
-----EPRR-----S-----

```

-----  
---  
>Rapgef4\_[Saimiri\_boliviensis\_boliviensis]\_403258758  
-----  
-----  
-----  
-----  
-----MAG-L  
LAPPYG--VMETGS--N-N-----DRIPDKE-----  
-----N-----  
-----VPS-----  
-----EKIL-----KA-----GKILR-NAILSRA  
PH-M-----IRDRKYH-----L-KTY-----RQC-CV  
GT-----ELVDWMMQQT-----  
---PCVH-----SRTQAVGMW---QVLLEDGVLN-----  
-----H-----VDQ-EHHFQDKY-LFYRFLDD  
-----EHED---AP-L-----  
-----PT  
EEEE--KECDEEL-----QDTMLLLSQMGPDH-----MRMILRKPPGQRT  
VDDLE-----IIYEELLHIKALSHLS-TTVKRELA-GVLIFESHAKGGTVL-----  
-----FNQGEEG--TSWYIIL  
KGSVNVVIYK-----GV-----VCTLHEG-DDF  
GKLAL-----VNDAPRA---ASIVLREDNCHFLRVDKEDFNR-----ILRD--  
-----V-----  
-----  
-----  
-----EANTVRLKEHDQDVLVLEK-----VPA-GNRASNQG  
NS----QP-QQ-----K-YTVMSGTPEKI  
LEHFLET-----IRLEA-SLN-----EA-----TDSVLN---D-  
FIMMHCV--FM-----PNTQLCPALV---A-----  
-----H-----Y-----HAQPSQ---GTEQEKMDYALNNKRRVIRLVLQ  
WAAMYGDLLQED-DVSMFLE---EFYVS--VSDDA--RMIAALK---EQ-LPELEKIV  
KQI---SED--AK-----APQKK-----  
---HKV-----LLQQFNTGD-ERAQ-KRQ-----  
-----  
-----  
-----  
-----  
-----PIRGSDE--VL-----FK-----  
VYCMDHTYTTIRVPVAASVKEVIS-----AVADK-----LGSG-EG--LIV  
VKMSSG-----GEKV-----LKPNDVSVFTTLTINGRLFAC  
PREQ---F-DSLT-PLPEQ-----EGP-----TVGTV  
GT--FELMSSKDLAYQMTIYDWELFHCVHELELIY-----HTFGRHNF-KK-TTANLD  
LFLRR-----FNEIQFWV-----VTEICLCSQLSKR-----VQLLKKFIKIAAH-  
-----CKEYKNLNSFFAIVM-GLSNVAVSRLALTWE-----  
-----KLPSKFKKFYAE-FESLM-----DPSRNH--  
-RAYRL---TVAK-----LEPPLI-PFMP-----  
LLIKDMFTTHEGNK--TF-ID-----N-LVNFE-KM  
-----RM---IANTARTVRYRS--Q-----PFNPD--  
-A-----AQANKNH---Q-----DVR-----YV  
RQLNVIDNQRTL-----SQMSHRL  
-----EPRR-----P-----

```
-----  
-----  
-----  
-----  
-----  
-----  
-----  
-----  
-----  
-----  
  
---  
>Rapgef4_[Salmo_salar]_929302579  
  
-----  
-----  
-----  
-----MK-----ITRLG-T-RKYRQCMAG-L  
LAPSYG--VMESGG--P-SP-----DRMPDKE-----  
-----NIS-----NNSFGSISKHLSKK-----  
-----SFTENPAKLHP-K-SISQ-----VPS-----  
-----EKIM-----RA-----GKVL R-DAIL SRA  
PH-I-----IRDRKYH-----L-KTY-----RQC-CV  
GT-----ELVDWQMQQS-----  
---SCVH-----TRIQA VGMW---QVLLEEGVLN-----  
-----H-----VDQ-ELTFQDKY-LFYRFLDD  
-----EQED---AP-L-----  
-----PT  
EKEA---RESNEEL-----QDTLLLLSQIGPDAH-----MRMILRKQPQGRT  
ADDLE----IIYEELLHIKALSHLS-TTVKKELA-GVLIFESHAKAGTVL-----  
-----FNQGE EG--TSWYIIL  
KGSVNVIYGK----GV-----VCTLHEG-DDF  
GKLAL-----VNDAPRA---ASIVLREDNCHF LRVDKEDFNR-----ILKD--  
-----V-----  
-----  
-----EANTVRLKEHYQDV LVLEK-----SPS-S---NST  
TS---SS-HY-----K-YTVM SGTPEKI  
LEHFLEM-----MRLDS-HLN-----ES-----DPALD---D-  
FVLMHC V--FI-----PNSQLCPVLM-----A-----  
-----H-----Y-----HAEASQ---GSEQERLDYTLNNKR RVIRLV LQ  
WASVHG DHLQEE-DASLAFLE---EFFVS--VSDDA--RVIPALK---DQ-LPELEKIV  
KNT---SDD--AR-----SSQ QK-----  
---HKV-----LLRQFSMGD-EKLQ-KRQ-----  
-----  
-----  
-----  
-----  
-----AIKS NDE--IL-----FK-----  
VYCSDHTYT TIRVPMAASVREVIS-----AVADK-----LGSA-ED--LLL  
VNLSSA-----GDKVV-----LKPNDISVFSTLSINGRLFVC  
PGDQ---L-DSL T-PLPEQ-----EGP-----STGSL  
SS--FELMSSKDLAYOMTLYDWELFHCVHEHEL IY-----YTFGRONF-KK-TTANMM
```







```

---NDH-----NHEIDGYHI---LIDKLYRLSPEAL-----FRKILOKLPSNRIT  

ENELQ----YVYQEELLVPALSSFS-ISVKQELC-KCLYYEVHENALDIV-----  

-----FYQGDPG--ISWYIYY  

HGSVVVHINNQ----GY-----ICLLNEG-DDF  

GKLSL-----ITDKPRA--ASILLAENNCHFLKLNKNDFNR-----ILCN--  

-----V-  

-----  

-----EANTVHLKNNNSDVLILER-----IPDNKLLIQQLQN  

NQ-LHNHSHHQI-----NDNDNQLI---NKLTLDHN-YSIAGTIEYI  

LYHLENCNL---NELNN--QLQSIINNQL---YP-----SYLPHTPYNIDQTWQI  

FFLTYKL--FT-----TNNEILLFLY-----KYL-----  

-----ATSE-----HGDSSVTATTTT  

TTTTTTSTTTSTT---ANYVK---SLDNQ-----DT-----TIVH--NEQYNPEMKSIP  

NLLF-----DLHISPNI-----TLP-----  

-----LIQSIHTVT-----  

-----I-----  

-----  

-----  

-----  

-----KIYIT-----ELT-----  

-----KQIYMTVPIEANVYEIKQL-----LITNQMIQS---NI-----NE-LKL  

VEVFSK-----GDWII-----YQDYECGIMFSLSSNSRFLTL  

KESQ---I-QNLI-PLAEQLIVTMNFLELNDIDRIKNFNQHHDLL---LRKNRLMQTSI  

RL--LDELTI DELATI LS YCHVQLAICIHPQELLDYVIDN---NNHNK-ANKPCSHIR  

TLVKR-----FSSLHAWT-----ITQIVTTCNLTKR-----VNIIKKLIKLANCL  

LS-----SPLYDLYSSF A I L -GLQNSSITRLTHTWE-----  

-----RVPNRWRRLFNDTLLPLT-----DPSKNH---  

-R TAR LWNNYNENNNNYIMHNIINLPRL-PFLP-----  

LILKDLRF A EDANQ-----TDYHKTDNNNNNNNNN-----NNRLINFN-KM  

-----RL--ISTSLRSWINCISGYEL-----LHPYNQ  

FID-----LNNNNNNKINNSLINNIT-VQKLL--EVTNESKIFVL  

EHLHCIDDPKII-----TQLSLRL  

-----EPKK-----  

-----  

-----  

-----  

-----  

-----  

-----  

-----  

-----  

-----  

-----  

-----  

>Rapgef4_[Sinocyclocheilus_anshuiensis]_1025001496  

-----MV-----A-----AH----TSSHPSA  

SAEWII---CLDK-----RLEE-----RSGEDVDIILARLKSVKA FEKFHPALL  

QQICLCGF--YECLE--KGITLYRQG DIG TN WYT VLS G S LD VKV SE-TANH QDA-----  

-----VTICTLGIGTA FG ES IL DNT-PRHATIV-TREFSELL-----  

-----WIEQKD-----FRTLW---ENYRQC MAG-L  

LVPPYG--VMESG---P-NA-----DRMPDKD-----
```



[illegible]





LFLRR-----FNEVQLWV----VTEVCLCLTLSKR-----VQLLKKFIKIAAH-  
-----CKEFKNLNSFFAIIM-GLGNPAVCRLSHTWE-----  
-----KLPSKFKKFYGE-FENLM-----DPSRNH--  
-RAYRL---TVAK-----LEPPII-PFMP-----  
LLIKDMFTTHEGNK--TF-TD-----R-LVNFE-KM  
-----RM--IANTVRIMRYCRS--Q-----PFNQEA-  
-P-----QATGKSH---Q-----DVRS-----YM  
RHISVIDNQRTL-----SQLSHRL  
-----EPRR-----T-----

```
>Rapgef4 [Sorex araneus] 505771648
```

-----MAG-L  
LAPPYG--VMETGS--N-N-----DRIPDKE-----  
-----N-----  
-----VPS-----  
-----EKIL-----RA-----GKILR-NAILSRA  
PH-M-----IRDRKYH-----L-KTY-----RQC-CV  
GT-----ELVDWMMQQT-----  
---PCVH-----SRTQAVGMW---QVLVEDGVLN-----  
-----H-----VDQ-EHHFQDKY-LFYRFLDD  
-----EHED---AP-L-----  
-----PT  
EEEE--KECDEEL-----QDTLLLLSQMGPDHAH-----MRMILRKPPGQRT  
LDDLE-----IIYEELLHIKALSHLS-TTVKRELA-GVLIFESHAKGGTVL-----  
-----FNQGEEG--TSWYIIL  
KGSVNVVIYGK---GV-----VCTLHEG-DDF  
GKLAL-----VNDAPRA---ASIVLREDNCHFLRVDKEDFNR-----ILRD--  
-----V-----

-----EANTVRLKEHDQDVLVLEK-----VPA-GNRASNQG  
NS---QP-QQ-----K-YTVMMSGTPEKI  
LEHFLET-----IRLEP-ALI-----EA-----TDSVLN---D-  
FVMMHCV--FM-----PNAQLCPALV-----A-  
-----H-----Y-----HAQPSQ--GTEQEKMDYALNNKRRVIRLVLQ  
WATMYGDLLQED-EVAMAFLE---EFYVS--VSDDA--RMIAALK--DQ-LPELEKIV  
KQI---LED-AK-----APQKK-----  
---HKV-----LLQQFNTGD-ERTQ-KRL-----



[illegible]

FEDK--QQAEAEL-----PETLGLLLQLAPDAI-----FRMILRKPLGDRS  
TEDLE----IIYEELLHIKALSHLS-NSVKRELA-GVLVFESHHPKAGTVL-----  
-----FNQGDEG--KSWFIIL  
RGSVNVVIY GK---GI-----VC SLHEG-DDF  
GKLAL-----VNDAPRA--ATIITRENNCHFLRV DKEDFNN-----IIRD--  
-----V-----  
  
-----EANTVRLKEHGQD VLLL QK-----IPT-----DG RA  
AD--GTHS-HY-----K-YMV MAGTPQM  
LEH LLET RIDQRN ED-----AS-----DT FLE---D-  
F LL TH VI--FM-----PSHQ LCPELM-----R-----  
-----HYRID AAN-----SRQE KEFIVANKKR VLQFVQ I  
WANLIR DAFFED-ASIA AFLQ---ELQEA--VAEDC--KKY--G--L HEE-LSAISK II  
EK K-QKF DEEV TG-----VC-RR-----  
---WKVGAY GQIR LLLASESQDE-ERTE-FK-----  
  
-----R-----  
  
-----CIK ASDE--VV-----FR-----  
VYC ADHTYT TIK TPVSATA EAI KR-----SAA EK-----LGFK-DD--LLL  
VE VKST-----SERVI-----FK DSEVSVPT GLSVNGRI FLT  
PADQ--V-DLLT-PLPEQ-----DGP-----TDGTG  
VI--LET LN SLDI AYNM TI YE WDLFS CV HE Y ELI Y-----Q VFGR HQF-RK-IM SN LD  
V FL RR-----FNEVQ FWV-----VT EM TLAT TLSRR-----VAL LR KF IK IA AH-  
-----CREYQN M NS FF AI VM-GLSN VA VS RMSQTWE-----  
-----KL PS KL RT FAD-FE AL I-----DP SRNH--  
-RRY RL---TVAK-----MV PPII-PFMP-----  
LLL KD MT FS HE GN K--TF-ME-----G-LL NFE-KM  
-----HM--IA QT LR TI RH CRS--Q-----P LV FDP-  
-P-----PG-NKSQ---Q-----DVRN-----YI  
RNLR I IDNQKRL-----TQLSDAL  
-----EP RR-----P-----

>Rapgef4\_[Strongylocentrotus\_purpuratus]\_390363651

-----RTSPA-----  
-----RTHDGLDPIHPAL-PIVK-----VPS-----  
-----DKQS-----HT-----GTIFR-TLILAKS  
PN-L-----IKDRKNN-----L-RTY-----RKC-MV  
GS-----EMVDWLMQQG-----  
-QMTLVR-----SRPQAIGMW---QALLEEGVIT-----  
-----E-----VNR-EHPFQDAE-HQYRFRED  
-----DLGI---TS-T-----  
-----PT  
SSQK--KAAEEEL----PEIVGILAKVAPDAM-----MRLILRKPPQERS  
VDDLE-----IIYEELLHIKALAHL-SGMVKRQLT-SVLVFECHEKAGTVL-----  
-----FHQGDEG--RSWFII L  
RGSVNVVKYGK---GV-----VCTLHDG-DDF  
GKLAL-----VNDAPRA--ASIVLREDNCQFLRV DKYDFNR-----ILRD--  
-----V-----  
  
-----EANTVRLKEHGQDSL VLEK----IPT-STQHSNNN  
KH-HH--VS Y-----R-Y SVMAGVPEKM  
LEHLL ETRI-----DSKYDP-----TDTFLE---D-  
FLLTHIV--FM-----PSEKLC PALL-----Q-----  
-----H-----YH-----SERTSSR---GPEQETIDHIVNNKRRVVQLVCL  
WHVVAGYA F K Q D - T T I M Q F L E --- T L F S A -- V C D D C -- P A Y P S L Q --- D P - L A S L E Q V L  
KAV-KSTKD-SGS-----HTWQV-----  
---QTQ-----VLSES RTHQ-EDEL-RRT-----  
  
  
-----PIKAKDE--TI-----FK-----  
VYCADHTYTTLRVHMDTSVTNIIQ-----TVSEK-----MCLG-ND--LV L  
CEVKSS-----GERLS-----FHQKDVC IATSLSCNGRIFIT  
LRDH--L-DALT-PLPEQ-----EGP-----SEG SV  
SF--LEPTSSRELAYQMTMYDWQLFLCTHECEFIY-----HTFGRHKY-RR-ITANLD  
VFLRR-----FNEVQSWI-----VTELCLTSHISK R-----VHLLKKFIKIAAH  
-----CKEYQNMSFYAIIM-GLSHMSVSRLAQ TWD-----  
-----KLPNKLKRVFS D-FEALM-----DPSRNH---  
-RVYRL---ALS K---MRPPII-PFMP-----  
LLIKDMLFTHEGNK--TY-FE-----G-LVNFE-KM  
-----HL--VASIMRVVKYCRS--E-----NFKLD--  
-S-----PPAVKNV---K-----EIVS-----YV  
RNLQVIDNTKRL-----MQLSYTL  
-----EPPK-----T-----



-----  
---  
>Rapgef4\_[Struthio\_camelus\_australis]\_697502539  
-----  
-----  
-----  
-----  
-----MSG-L

LTPPYG--VMETGS--N-N-----DRMPDKE-----  
-----NMP-----S-ALCQVSKNCNKT-----  
-----PLIEPHIPHRPTK-TITQ-----VPS-----  
-----EKIL-----RA-----GKILR-NAILSRA  
PH-M-----IRDRKYH-----L-KTY-----RQC-CV  
GT-----ELVDWMMQQS-----  
---PCVH-----SRTQAIGMW---QVLLEEGVLN-----  
-----H-----VDQ-EHHFQDKY-LFYRFLDD  
-----EHED---AP-L-----  
-----PT  
EEEE--KECDEEL-----QDTMLLSQIGPDAH-----MRMILRKPPGQRT  
VDDLE-----IIYEELLHIKALSHLS-TTVKRELA-GVLIFESHKAGTVL-----  
-----FNQGEEG--TSWYIIL  
KGSVNVVIYGK----GV-----VCTLHEG-DDF  
GKLAL-----VNDAPRA---ASIVLREDNCHFLRVDKEDFNR-----ILRD--  
-----V-----  
-----  
-----

-----EANTVRLKEHDQDVLVLEK-----IPA-GNRVSNQG  
NS----QP-QH-----K-YIVMSGTPEKI  
LEHFLET-----MRLEA-TLN-----EA-----TDSVLN---D-  
FIMMHCV--FM-----PNSQLCPALM---A-----  
-----H-----Y-----HAQPSQ---GTEQEKMDYALNNKRRVIRLVLQ  
WAALYGDLLQED-EAAMAFLE----EFYVS--VSDDT--RMIAALK---EQ-LLELEKIV  
KQV---SEE--PK-----APQKK-----  
---HKV-----LLQLFNTSD-DRAQ-KRQ-----  
-----  
-----  
-----  
-----

-----PIRGSDD--VL-----FK-----  
VYCIDQTYTTIRVPVSSSVKEVIS-----AVADK-----LGSG-EG--LIL  
VKMSSG-----GEKVV-----LKPHDVSFVTTLSVNGRLFAC  
PRDQ---F-DSLA-PLPEQ-----EGP-----SAGTV  
GT--FELMSSKDLAYQMTIYDWELFNCVHELELIY-----HTFGRHNF-KK-TTANLD  
LFLRR-----FNEIQFWV-----VTEICLCSQLSKR-----VQLLKYYIKIAAH-  
-----CKEYKNLNSFFAIIM-GLSNVAVSRLSLTWE-----  
-----KLPSKFKKIYAE-FESLM-----DPSRNH---  
-RAYRL---TVAK-----LDPPII-PFMP-----  
LLIKDMFTTHEGNK--TL-TD-----N-LVNFE-KM  
-----RM---IANTVRTVKFCRN--Q-----SFNPD--  
-A-----ALANKNH---Q-----DVRs-----YV  
RQLNVIDNQRTL-----SQMSHRL  
-----EPRR-----A-----

```
>Rapgef4_[Sturnus_vulgaris]_959065034
-----MVA-----HA-----SH-----SSS
SGEWIA--CLDK-----RPLE----RSEDVDIIFTRLKEVKAFEKFHPNLL
QQICLCGY--YENLE--KGITLFRQGDIGTNWYAVLTGSLDVKVSD-TSNHQDA-----
-----VTICTLGIGTAFGESILDNT-PRHATIV-TREHSELL-----
-----RIEQKD-----FKALW--EKYRQYMSG-L
LTPPYG--VMETGS--N-N-----DRMPDKD-----
-----SMS-----SSALCQVSKNCSKT-----
-----PLIDPHISHHPTK-IITQ-----VPS-----
-----EKIL-----RA-----GKILR-NTILSRA
PH-M-----IRDRKYH-----L-KTY-----RQC-CV
GT-----ELVDWMMQQS-----
---PCVH-----LRTQAVGMW--QVLLEEGVLN-----
-----H-----VDQ-EHHFQDKY-LFYRFLDD
-----ERED---AP-L-----
-----PT
EEEE--KECDEEL-----QDTMLLLSQIGPDAH-----MRMILRKPPGQRT
VDDLE-----FIYEELLHIKALSHLS-TTVKRELA-GVLIFESHPKAGTVL-----
-----FNQGEEG--TSWYIIL
KGSVNVVIYGK----GV-----VCTLHEG-DDF
GKLAL-----VNDAPRA--ASIVLREDNCHFRLVDKEDFNR-----ILRD-----
-----V-----
-----
-----EANTVRLKEHDQDVLVLEK----IPA-GNRISNQG
NS---QP-QH-----K-YIVMSGTPEKI
LEHFLET-----MRLEA-TLN-----EA-----TDSVLN---D-
FIMMHCV--FM-----PNSQLCPALM-----A-----
-----H-----Y-----HAQPSQ--GTEQEKMDYALNNKRRVIRLVLQ
WAALYGDLLQED-EAAMAFLE---EFYVS--VSDDT--RMIAALK--EQ-LPELEKIV
KQI---SEE--PK-----APQKK-----
---HKV-----LLQLFNTSD-DRAQ-KRQ-----
-----
-----
-----
-----
-----PIRGSDE---VL-----FK-----
VYCIDQTYTTIRVPVSSSVKEVIS-----AVADK-----LGSG-EG--LII
VKMSSG-----GEKVV-----LKPHDVSVFTTLSVNGRLFAC
PRDQ---F-DSLA-PLPEQ-----EGP-----STGTV
GT--FELMSSKDLAHOMTIYDWELFNCVHELELIY-----HTFGRHNF-KK-TTANLD
```





AS---SS-QY-----K-YTIMSGTPEKI  
LEHLLEM-----MRLDS-QFT-----ES-G---NSALD---D-  
FVLTHPV--FI-----PNSQLCPVLM----A-----  
-----H-----Y-----HAQASQ--GCEQERMDYTLNNKRVRIRLVMR  
WAAVHGDLLEE-EDVVAFLQ---EFLVA--VSNDA--KVLPALR---EQ-LAKLEITY  
KHY---TED--AR-----ISRKK-----  
---HKV-----FLRQFSTGE-EKLQ-KRQ-----  
-----  
-----  
-----  
-----  
-----  
-----PIKSNDL--IL-----FK-----  
VYCCDNITYTTIRAPVAASVRELIS-----SLAEK-----LGST-ED--LLL  
VSLGSA-----GEKVI-----FKPNVDVSVFSTLSINGRLFVC  
RRDE--L-DSLT-PLPEQ-----VEP-----SAGLS  
SN--FELMSSKDVAChMTSYDWELFNcVHELELIY-----HTFGRQNI-QK-TTVNLd  
LFLRR-----FNEIQFWV-----ITEMCLCSQLSKR-----VQLLKkFIKIAAH  
-----CKEYKNLNGFFAITM-GLSNPAVCRLNMtWE-----  
-----KLPSKFRKFyRE-FENLM-----DPSRNH---  
-RAYRL---TVAK-----LDPPII-PFMP-----  
LLIKDMTfTqEGNK--TF-ID-----T-LVNFE-KM  
-----RM---IANTVKILRYCRS-Q-----PFSPD---  
-S-----PQAGKSH---S-----DVRA---YV  
RQFNVIDNQRTL-----SQLSHSL-----  
-----EPPR-----S-----

-----MDDVDNIVGKCLKLTRFFQRMHPSLL  
QQICKHAI--VERLD--KSVVVFRRQGDKAFNWYAVVTGSLDVQVNA--KAKEV-----  
-----VTLCTLGVGTAFGESVLTGK-PHSVSI-TNEPCTLLRVKDEFQEIWDQN--  
--SH--LM-----T-----D-----I  
VTPLVGLRCLKRASf--NKSLSI--RITSTNDNCN---S-----  
-----TNQSSSES--NNNSNNSSSKNSS-----  
-----NNNCNIITTK-NSTKSN-----NSLDSLSYRFKSIQ-----  
--RDQSVELL-----QI-----GRILR-ALIIAHD  
PS-M-----IRDRKYN-----VGLVY-----RNC-LV  
GS-----ELVDWLISAS-----S  
VTPKRIH-----SRSQAAML--QVLLEENVLT-----  
-----S-----PTG-DSQFWDKY-LFYRFIFD  
G-EDESLRSED--LPSL-----PS  
-----PS

[illegible]

[illegible]

-----  
---  
>Rapgef4\_[Tribolium\_castaneum]\_642935500  
-----

-----MAGTLEVRIIP-PESDTK-----V  
P-----VTLCTLGVGATFGESILQDL-PRDTTVV-TQTTCELLRVEQHDFKLIWE-----  
KNKE--LMNDLV-----S-NCKLKNGFGTAV-S-GS-----KG-VGMQQ-P  
ISPPP-----R--RSMSPDQPNPAE-----

-----PITE-----  
-----SPSTIIGRI-----GWALR-TLLLSQN  
T--C-----LKDRKVS-----G-R-L-----VRRRC-AP  
GT-----ELVDWLLGLS-----  
---SSIH-----TRAQAAGMW---QALLEEGVIS-----  
-----H-----VSK-EQPFDKDC-FLYRFWQD  
E-----E---GP-T-----

-----S---LPP  
LEDV--ATAEEQI-----QDSLGTLIHRGPDV-----LRMILRKQSHERT  
PDDLE-----TIYEELLHIRALAHLS-NSVKRELS-SVIVFEAHPRAGTVL-----  
-----FHQGDEG--RSWYIIV  
RGSVDVVIHGK-----GT-----VNTLHEG-DDF  
GKLAL-----INDAPRA---ATIVLRENNCHFLRVDKENFN-----ILRD--  
-----V-----

-----EANTVRLKEHGKDVILEK-----INT-----  
-----PTKQI--FSS-----HFK-----YTMAGTPQKM  
LEHLEET-----RLDGRG---T-----MGGGDNFIITSAQDPFLD---D-  
FLLTHIV--FI-----PTHQLIAELD-----N-----  
-----YY--RIDS-----S-----N-----QDKEFVLACKRRVIQFVYR  
WVTTIRHPVFED-DVAVEFLD---DLASE--LESDC-----I---Q-WNALQEEA  
SLM-----  
---HHV-----MSQLRRYQE-DRKAHEGQK-----  
---WKLPP---CGQPIS-----LFSGNET-----  
---NRT---I-----

-----IMPQDD--II-----FR-----  
VYCADHTYCTLRPVDTTAETIKI-----VAAEK-----LKM-RSTDELLL  
VEVKS-----GERVT-----FKDNDISIPTALSINGRIFVS  
PKDH---L-DALT-CLAEQ-----EES-----TQGID  
A--DIELFSTKELAYMTLFDWDLFWCVHEYELLY-----HTFGRHHF--GQITANLD  
VFLRR-----FNEIQFWV-----VTEICMTTSLSKR-----VALLRKFIKLAAY-  
-----CKEYQNLNAFCAIVM-GLSNVAVSRLSLTWE-----  
-----KLPSKFRKLYTE-FESLI-----DPSRNH-----  
-RAYRV---SVGK-----LQPPVV-PFMP-----  
LLLKDMFTTHEGNK--TS-LD-----G-LVNFE-KM  
-----HM---LAQTMRTIRFCRS--R-----HLVL-----EPP--  
-----SPKSE---G-----EVKS-----YI  
SCLRVIDNQRVL-----TSMSQKL  
-----EPRR-----S-----



```
>Rapgef4_[Trichechus_manatus_latirostris]_823389193
-----MVAA-----HA-----AH-----SSS
SAEWIA--CLDK-----RPLE----RSEDVDIIIFTRLKEVKAFEKHFHPNLL
HQICLCGY--YENLE--KGITLFRQGDIGTNWYAVLAGSLDVKVSE-TSSHQDA-----
-----VTICTLGIGTAFGESILDNT-PRHATIV-TRECESELL-----
-----RIEQKD-----FKALW--EKYRQYMAG-L
LAPPYG--VMETGS--N-N-----DRIPDKE-----
-----N-----
-----VPS-----
-----EKIL-----RA-----GKILR-NAILCRA
PH-M-----IRDRKYH-----L-KTY-----RQC-CV
GT-----ELVDWMMQQT-----
---QCVH-----SRTQAVGMW--QVLLEDsvLN-----
-----H-----VDQ-EHHFQDKY-LFYRFLDD
-----EHED--AP-L-----
-----PT
EEEE--KECDEEL-----QDTMLLLSQMGPDAH-----MRMILRKPPGQRT
VDDLE-----IIYEELLHIKALSHLS-TTVKRDVC-GIAIFSSFL--CLV-----
-----FNQGEEG--TSWYIIL
KGSVNvVIYGK----GV-----VCTLHEG-DDF
GKLAL-----VNDAPRA--ASIVLREDNCHFLRVDKEDFNR-----ILRD--
-----V-----
-----
-----EANTVRLKEHDQDVLVLEK----VPA-GNRASNQG
NS---QP-QQ-----K-YTVMsGTPEKI
LEHFLET-----IRLEP-ALN-----EA-----TDSVLN---D-
FIMMHCv--FM-----PNTQLCPALV-----A-
-----H-----Y-----HAQPSQ--GTEQEKMDYSLNNKRRVIRLVLQ
WAVMYGDLLOED-DVAMAFLE---EFYVS--VSDDA--RMIAALK--EQ-LPELEKIV
KQI--LEE-AK-----APRKK-----
---HKV-----LLQQFNTGD-ERAQ-KRQ-----
-----
-----
-----
-----
-----PIRGsDE--VL-----FK-----
VYCMDHTYTTIRVQVAASVKEVIS-----AVADK-----LSSG-EG--LMI
VKMSSG-----GEKVV-----LKPNDVSvFTTLTINGRLFAC
PREQ---F-DSLT-PLPEQ-----EGP-----TVGTV
GT--FELMSSKDLAYOMTIYDWELFNcVHELELIY-----HTFGRHNF-KK-TTANLD
```





[illegible]

[illegible]

YSPLMDTTSSTSSFLSDTDQSTTDSQVSSKFSIQIKKKKKKKKKPEKRRKGLKNNFQSFHS  
 IYCTMPADSSVDPQREVS-TLRKSSSVSDKLEVKNPATSIGDPMAEPANGITTNATATAR  
 PDDSQVNNNLIELKNLLTPDMQISWA-----SRVLR-SAMVRS  
 PN-M-----IRDRKFQ-----MTL-----YK-----RC-MV  
 GT-----EMVDWLLRQS-----  
 ---NSVV-----QNRMQAAGIW---QVLLEEGIIH-----  
 -----H-----VTH-EYPFLDKY-LFYRWVED  
 E-----RSTD---AA-V-----  
 -----RALNLS  
 DD---GIYSENDF-----LLAISNLSIMGPDAL-----FRMVLRKAPNERS  
 NEELE----VVFEELLNIALSNLS-TMVKRELA-TVIMFEQHQNAGTVL-----  
 -----FRQGDQG--KSWYIIL  
 KGSVNVIHGK---GV-----VCTLQEG-DDF  
 GKLAL-----VNDAPRA--ATIILNENCCQFLRVDKHDFDR-----ILRD--  
 -----V-----  
 -----  
 -----EANTVRLKEHGHDLVLEK----VPI-----  
 -----R-----VNRSPIAYR-----YSVMAGTPEKM  
 VEYLLET-----RIDC-----AKDE---DIADTFME---D-  
 FILTHLI--FM-----PTNELCNALT-----I-----  
 -----YYQQ-GCSSI---NGNSAL----SE---SILTESVEHQLSFRKRVI AFLQA  
 WIQISGHMFYED-PVGAAFIE---EMYCA--ILEDSE-----RDH----PQLLPE-  
 -----  
 -----LTVVEKLMLR-EREQALGSS-----  
 ---AR-----PPVI-----LSDNNFI-RE  
 L--PANSP-----  
 -----  
 -----  
 -----VLPDFL--C-----IVKV  
 NSSDSLRTSTLKIRVDQT CETIKR-----MASQK-----LGLGN-GEGVEL  
 VEKSN-----REKNI-----FTPNDTGIPTSM SHNGRLFAC  
 FKDQ--V-ESLS-PLPEQ-----AGP-----SESVH  
 SV-ILETLTSTELAQHLLIYHWQLFINTHEYELLY-----HVVGRNLF-PGKVPVNLD  
 LLIRR-----FNELQFWV-----ITEILLCGSVSKR-----AHVVKKFIKIALH-  
 -----CKANQDLFSFFAITL-GLSNVAISRLSQTWE-----  
 -----KVNAKFRKLFFE-FESLL-----DPSRNH--  
 -RAYRL---LVAK-----MKPPTI-PFIP-----  
 LLLKDLLFAHEGNK--TY-FD-----G-MVNFE-KM  
 -----HM--MAQTLRNHRMYKS--Q-----MLQI-----D--  
 -----SSKIP-----T-----DAQH-----LV  
 RNFRIIDDQRKF-----LRLSQLL  
 -----EPKQ-----KDTT-----

-----  
---  
>Rapgef4\_[Trichinella\_sp.\_T6]\_954280930  
-----MSMLKKELYMSSPKSNS  
RDEQAMPPKTKNIFKTALFAMAFKRACSKSIKKVSHADCNSVADRIRGVAAFEHFSQQLV  
ELLASRG--LYEELD--AGIVLFCEGKPSSNWWYALLDGSVDLYCYDPEKPS-----  
----ELVKIKTLHSGCTFGEGALNKQ-LQPCTAI-VSQRSQFIRLDFSSLSLIWE-----  
QYEN--ELMQNTVSLESIVKNKFVKTS-SSKMSKGVKQAD-SVLSAFKSETSAFAAA-T  
NYKPSKEDAVNCEPKQTAASVGEQ--MSLKANQPFPMRGVVASDSSALLSSRAK-----  
YSPLMDTTSSTSSFLSDTDQSTTDSQVSSKFSIQIKKKKKKKKKKPEKRKGLKNNFQSFHS  
IYCTMPADSSVDPQREVS-TLRKSSSVSDKLEVKNPATSIGDPMAEPANGITTATATATAR  
PDDSQVNNNLIELKNLLTPDMQITWA-----SRVLR-SAMVVRS  
PN-M-----IRDRKFQ-----MTL-----YK-----RC-MV  
GT-----EMVDWLLRQS-----  
---NSVV-----QNRMQAAGIW---QVLLEEGIIH-----  
-----H-----VTH-EYPFLDKY-LFYRWVED  
E-----RSTD---AA-V-----  
-----RALNLS  
DD---GIYSENDF-----LLAISNLSIMGPDAL-----FRMVLRKAPNERS  
NEELE-----VVFEELLNKALSLS-TMVKRELA-TVIMFEQHQNAGTVL-----  
-----FRQGDQG--KSWYIIL  
KGSVNVVIHGKVPISPGV-----VCTLQEG-DDF  
GKLAL-----VNDAPRA---ATIILNENCCQFLRVDKHDFDR-----ILRD--  
-----V-----  
-----  
-----EANTVRLKEHGHDLVLVLEK-----VPI-----  
-----R-----VNRSPIAYR-----YSVMAGTPEKM  
VEYLLET-----RIDC-----AKDE---DIADTFME---D-  
FILTHLI--FM-----PTNELCNALT---I-----  
-----YYQQ-GCSSI---NGNSAL-----SE---SILTESVEHQLSFRKRVIQFLQA  
WIQISGHMFYED-PVGAAFIQVVMVEMYCA--ILEDSE-----RDH-----PQLLPE-  
-----  
-----LTVVEKLMR-EREQALGSS-----  
---AR-----PPVI-----LSDNNFI-RE  
L--PANSP-----  
-----  
-----  
-----VLPFDL--C-----IVKV  
NSSDSLRTSTLKIRVDQTCETIKR-----MASQK-----LGLGN-GEGVEL  
VEVKS-----REKNI-----FTPNDTGIPSTSMHNGRLFAC  
FKDQ--V-ESLS-PLPEQ-----AGP-----SESVH  
SV-ILETLTSTELAQHLLIYHWQLFINTHEYELLY-----HVVGRNLF-PGKVPVNL  
LLIRR-----FNEQLQFVW-----ITEILLCGSVSKR-----AHVVKKFIKIALH-  
-----CKANQDLFSFFAITL-GLSNVAISRLSQTWE-----  
-----KVNAKFRKLFFE-FESLL-----DPSRNH---  
-RAYRL---LVAK-----MKPPTI-PFIP-----  
LLLKDLLFAHEGNK--TY-FD-----G-MVNFE-KM  
-----HM--MAQTLRNHRMYKS--Q-----MLQI-----D--  
-----SSKIP---T-----DAQH-----LV  
RNFRIIDDQRKF-----LRLSHLL  
-----EPKQ-----KDTT-----

[illegible]



```
LLIRR-----FNELQFWV-----ITEILLCGSVSKR-----AHVVKKFIKIALH-  
-----CKANQDLFSFFAITL-GLSNVAISRLSQTWE-----  
-----KVNAKFRKLFFE-FESLL-----DPSRNH---  
-RAYRL---LVAK-----MKPPTI-PFIP-----  
LLLKDLLFAHEGNK--TY-FD-----G-----M  
-----HM--MAQTLNRNHRMYKS--Q----MLQI-----D--  
-----SSKIP----T-----DAQH-----LV  
RNFRIIDDQRKF-----LRLSQLL  
-----EPKQ-----KDTT-----  
  
-----  
  
---  
>Rapgef4_[Trichinella_sp._T9]_954260542  
LQFHLCCLVIMRNVICCKFDYFGRISVACKNLEWLFAV----S---VPTELYMSSPKSNS  
RDEQAMPPKTKNIFKTALFAMAFKRACSKSIKKVSHADCNSVADRIRGVAAFEHFSQQVLV  
ELLASRG--LYEELD--AGIVLFCEGKPSSNWYALLDGSVDLYCYDPEKPS-----  
----ELVKIKTLHSGCTFGEGALNKQ-LQPCTAI-VSQRSQFIRLDFSSLSLIWE-----  
QYEN--ELMQNTVSLESIVKNKFVKAS--SSKMSKGVKQAD-SVSLSAFKSETSAFAAA-T  
NYKPSKEDAVNCDPKQTAASVGEQ--MSLKANQFPFMSRGVVASDSSALLSSRAK-----  
YSPLMDTTSTSSFLSDTDQSTTDSQVSSKFSIQIKKKKKKKK-PEKRKGLKNNFQS FHS  
IYCTMPADSSVDPQREVS-TLRKSSSVSDKLEVKNPATSIGDPM AEAPANGITTNATATAR  
PD DSQVNNNLIELKNLLTPDMQISWA-----SRVLR-SAMVVR S  
PN-M-----IRD RK FQ-----MTL-----YK-----RC-MV  
GT-----EMVDWLLRQS-----  
---NSVV-----QNRMQAAGIW--QVLLEE GIIH-----  
-----H-----VTH-EYPFLDKY-LFYRWVED  
E-----RSTD--AA-V-----  
  
-----RALNLSD  
DD---GIYSE NDF-----LLAISNLSIMGPDAL-----FRMVLRKAPNERS  
NEELE----VVFEELLN IKA LSNLS-TMVKRELA-TVIMFEQHQNAGTVL-----  
-----FRQGDQG--KSWYIIL  
KGSVNVIHGK----GV-----VCTLQEG-DDF  
GKLAL-----VNDAPRA--ATIILNENCCQFLRV DKHDFDR-----ILRD--  
-----V-----  
  
-----EANTVRLKEGHGHDVLVLEK-----VPI-----  
-----R-----VNRSPIAYR-----YSVMAGTPEKM  
VEYLLET-----RIDC-----AKDE----DIADTFME---D-  
FILTHLI--FM-----PTNELCNALT-----I-----  
-----YYQQ-GCSSI---NGNSAL-----SE---SILT ESVEHQLSFRKR VIA FLQA  
WIQISGHMFYED-PVGAAFIEVVV VEMYCA--ILED S-----RDH-----PQLLPE-  
  
-----LTVVEKL MR-EREQALGSS-----  
---AR-----PPVI-----LSDNNFI-RE  
L--PANSP-
```



```

-----R-----VNRSPIAYR-----YSVMAGTPEKM
VEYLLET-----RIDC-----AKDE----DIADTFME---D-
FILTHLI--FM-----PTNELCNALT-----I-----
-----YYQQ-GCSSI---NGNSAL-----SE---SILTESVEHQLSFRKRVIAFLQA
WIIQISGHMFYED-PVGAAFIE---EMYCA--ILEDSE-----RDH-----PQLLPE-
-----
-----LTIVEKLMR-EREQALGSS-----
---AR-----PPVI-----LSDNNFI-RE
L--PANSP-----

```

```
>Rapgef4_[Trichinella_zimbabwensis]_954489455
-----MSSPKSNPCDAQAMSPKTKNIFKTALLTMAL-----KRLCSK-----
-----SIKKVSHAEYNLVADRIRGVAAFEHFSQQLV
ELLASHG--LYEELD--AGIVLFCGKPPSSNWYALLDGSVDLYCYDPEKSS-----
----ELVKIKTLHSGCTFGEGALNKQ-RQPCTAI-VSQRSQFIRLDFSSLSLIWE----
QYEN--ELMQNTVSLESIVKNKFVKAS-SSKMSKGVKQAD-SVSSSAFKSETSAFAAA-A
NYKPSKEEAVNCDPKQTTTNVGEQ--MPLKANQFPPTSRGVAASDSSALLSGRAK----
YSPLMDTTSSASSFLSDTDQSTTDSQLSSKFSIKIKKKKKKKKKKPEKRKGPKNNFQPFHS
IYCTAPADSSVDPEHEVNNTLRKSSSMGDKLEAKNPTSNIGDPVTEPANGITTNATATTR
PDDSQINNNLIELKNLLTPDMQISWA-----SRVFR-SAMVVR
PN-M-----IRDRKFQ-----MTL-----YK-----RC-MV
GT-----EMVDWLLRQS
---NSIV-----QNRMQAAGIW---QVLLEEGIIH
-----H-----VTH-EYPFLDKY-LFYRWVED
E-----RSTD---AA-V
-----RAINLSD
```

[illegible]

-----N-----  
-----VPS-----  
-----EKIL-----RA-----GKILR-NAILSRA  
PH-M-----IRDRKYH-----L-KTY-----RQC-CV  
GT-----ELVDWMMQQT-----  
---PCVH-----SRTQAVGMW---QVLLEDSVLN-  
-----H-----VDQ-EHHFQDKY-LFYRFLDD  
-----EHED---AP-L-----  
-----PT  
EEEE--KEWDEEL----QDTMLLLSQMGPDAH-----MRMILRKPPGQRT  
VDDLE----IIYEELLHIKALSHLS-TTVKRELA-GVLVFESHAKGGTVL-----  
-----FNQGEEG--TSWYIIL  
KGSVNVIYGK---GV-----VCTLHEG-DDF  
GKLAL-----VNDAPRA--ASIVLREDNCHFRLRVKD EDFNR-----ILRD--  
-----V-----  
  
-----EANTVRLKEHDQDVLVLEK----VPA-GNRASNQG  
NS---QP-QQ-----K-YTVMMSGTPEKI  
LEHFLET-----IRLEP-ALN-----GA---TDSVLN---D-  
FIMMHCV--FM-----PNTQLCPALV---A-----  
-----H-----Y-----HAQPSQ---GTEQEKM DYALNNKRRVIRLVLO  
WAAMYGDLLQED-DVAFAFLE---EFYVS--VSDDA--RMIAALK---EQ-LPELEKIV  
KQI---SED--AK-----APQKK-----  
---HKV-----LLQQFNTGD-ERAQ-KRQ-----  
  
-----PIRGSDV--VL-----FK-----  
VYCMDHTYT TIRVPVAASVKEVIS-----AVADK-----LGSG-EG--MI I  
VKMSSG-----GEKV V-----LKPNDVSVFTTLTINGRLFAC  
PREQ--F-DSL T-PLPEQ-----EGP-----TVGTV  
GT--FEL MSSKDLAYQMTIYDWEL FNCVHELELIY-----HTFGRHNF-KK-TTANLD  
LFLRR-----FNEIQFWV----VTEIC LCSQLSKR-----VQLLK KFIKIAAH  
-----CKEYKNL NSFFAIVM-GLSNVAVSRLALTWE-----  
-----KLPSKF KK FYAE-FESLM-----DPSRNH---  
-RAYRL---TVAK-----LEPPLI-PFMP-----  
LLIKDMTF THEGNK--TF-ID-----N-LVNFE-KM  
-----RM---IANTARTVRYRS--Q-----PFNPD--  
-A-----AQANKNH---Q-----DVRS---YV  
RQLNVIDNQRTL-----SQMSHRL  
-----EP RR-----P-----



-----

-----PLE-----RSSEDVDIIFTRLKEVK-----

[illegible]

[illegible]





[illegible]

[illegible]

-----NMN-----S-----  
-----DSG---HKAH-----N-----KVPS-----  
-----EKLQ-----RA-----GKVLRLNAILSRA  
PH-M-----IRDRKYH-----L-KTY-----RQC-CV  
GT-----ELVDWLVMQS-----  
---ACVL-----TRSHAVGMW---QALLEEGVLN-----  
-----H-----VDQ-ELGFHDKY-LFYRFLDD  
-----EEED---TP-L-----  
-----PS  
EEEE--RESEEEEL-----PETILFLAQIGPDAL-----LRMILRKPPGQRT  
ADDLE-----IIYDELLHIKALSHLS-NTVKRELA-SVVIFESHAKAGTVL-----  
-----FNQGEEG--TSWYIIQ  
KGSVNVVIYGK-----GV-----VCTLHEG-DDF  
GKLAL-----VTDSPRA--ASIVLREDNCHFLRVDKEDFNR-----ILRD--  
-----V-----  
-----  
-----EANTVRLKEHEQAVLVLEK-----S---HRVSTLG  
S-----I-----K-YTVISGTPPEKI  
LEHFLET-----MRLDI-HHN-----EP-----DPAVD---D-  
FVLMHCV--FM-----PNSQLCPLLM-----A-----  
-----H-----Y-----HVVSP--GSEQRLEYTLNNKRRALILT  
WANTHTYLLQEE-PAAVSFLE---ELYGS--VSNDS--RTLRLGLK--DL-VPDLEKVV  
KLH--SEE--VK-----STKKK-----  
-----T-----LIRQFSNGE-ERLQ-KKQ-----  
-----  
-----  
-----  
-----  
-----PIRNQDD--IL-----LK-----  
VYCSDHITYTTIRIPVVASGKEVIS-----AVSDK-----LGTT-EE--LLL  
VHLSSA-----GEKQM-----LKPNDVSVFSTLSINGRLFAC  
PREQ--L-GSLA-PLPDQ-----EGP-----SAGSM  
ST--FELMSSKDLAYQMTMFDWELFSCVHEHELLY-----HTFGRHSF-RR-TTANLD  
LFLRR-----FNQVQLWV---VTEVCLCTQLSKR-----VQLLKKFIKIAAH--  
-----CREFKNLNSFFAIIM-GMSNPAVSRLSQTWE-----  
-----KLPTKFKKFYAE-FESMM-----DPSRNH--  
-RSYRL---TVTK-----LEPPII-PFMP-----  
LLLKDMFTTHEGNK--TF-ID-----N-MVNFE-KM  
-RI---IANTIRQVRHCRS--Q-----PFNPD--  
-I-----CQPNKNQ--A-----EVRG-----YV  
RKLCVIDNQRAL-----TQLSYRL  
-----EPRR-----T-----

-----  
---  
>Rapgef4\_[Zonotrichia\_albicollis]\_929451867  
-----  
-----  
-----  
-----  
-----MSG-L

LTPPYG--VMETGS--N-N-----DRMPDKD-----  
-----SMS-----NSALCQVSKNCNKT-----  
-----PLIDPHIPHHTK-TITQ-----VPS-----  
-----EKIL-----RA-----GKILR-NTILSRA  
PH-M-----IRDRKYH-----L-KTY-----RQC-CV  
GT-----ELVDWMMQQS-----  
---PCVH-----LRTQAVGMW---QVLLEEGVLN-----  
-----H-----VDQ-EHHFQDKY-LFYRFLDD  
-----ERED---AP-L-----  
-----PT  
EEEE--KECDEEL-----QDTMLLSQIGPDAH-----MRMILRKPPGQRT  
VDDLE-----FIYEELLHIKALSHLS-TTVKRELA-GVLIFESHPKAGTVL-----  
-----FNQGEEG--TSWYIIL  
KGSVNVVIY GK-----GV-----VCTLHEG-DDF  
GKLAL-----VNDAPRA---ASIVLREDNCHFLRVDKEDFNR-----ILRD--  
-----V-----  
-----  
-----  
-----EANTVRLKEHDQDVLVLEK-----IPA-GNRISNQG  
NS----QP-QH-----K-YIVMSGTPEKI  
LEHFLET-----MRLEA-TLN-----EA-----TDSVLN---D-  
FIMMHCV--FM-----PNSQLCPALM---A-----  
-----H-----Y-----HAQPSQ---GTEQEKM DYALNNKRRVIRLV LQ  
WAALYGDLLQED-EAAMAFLE---EFYVS--VSDDT--RMIAALK---EQ-LPELEKIV  
KQI---SEE--PK---GPQKK-----  
---HKV-----LLQLFNTSD-DRAQ-KRQ-----  
-----  
-----  
-----  
-----  
-----  
-----  
-----PIRGSDE--VL-----FK-----  
VYCIDQTYTTIRVPVSSSVKEVIG-----AVADK-----LGSG-EG--LII  
VKMSSG-----GEKV V-----LKPHDVS VFTT LSVNGRLFAC  
PRDQ---F-DALA-PLPEQ-----EGP-----STGTV  
GT--FELMSSKDLAQMTIYDWELFNCVHELELIY-----HTFGRHNF-KK-TTANLD  
LFLRR-----FNEIQFWV-----VTEICLCSQLSKR-----VQLLK KYIKIAAH-  
-----CKEYKNLNSFFAIIM-GLSNVAVSRLSLTWE-----  
-----KLPSKFKKIYAE-FESLM-----DPSRNH---  
-RAYRL---TVAK-----LDPPII-PFMP-----  
LLIKDMFTTHEGNK--TF-TD-----N-LVNFE-KM  
-----RM---IANTVRTVKFCRS--Q-----SFNPE--  
-A-----ALTNKNH---Q-----DVR S-----YV  
RQLNVIDNQRTL-----SQMSHRL  
-----EPRR-----A-----



```
VFLRR-----FNEIQFWV----VTCLCLTPSLSKR-----VQILRKFIKLAAY-  
-----CKEYQNLNFAFFAIVM-GLSNVAVSRLSLTWE-----  
-----KLPSKFRKLYTE-FESLI-----DPSRNH---  
-RAYRI---SVGK-----LQPPVV-PFMP-----  
LLLKDMFTTHEGNK--TC-LD-----G-LVNFE-KM  
-----HM---LAQTMRTIRYCRS--R-----HLLL-----EPP--  
-----SPKSE-----A-----EVRS-----YI  
SCLRIIDNQRVL-----TSLSQKL  
-----EPRR-----S-----  
  
-----  
-----  
-----  
-----  
-----  
-----  
-----
```

**>Supplementary data 2: Sequence alignment of CBD of PKA/PKG, RAPGEF2/RAPGEF6 and EPACs**

```
>PK_[Penicillium_expansum]_1027044025
--SHLDDDQ---FLTVL-NALVEKPIPAKDIK--VISQGDAGDY---FYIVEKGNFVDVYI
--HPSGAV---QPGP-DGLGNKV-A---S-TGPG-GSFGEALALMYNAPRAATVISTEP--
-----K-STLWALDRITFRRI-LMDSAFQRRRMYE-----
>PK_[Penicillium_griseofulvum]_995936297
--SHLDDDQ---FLTVL-NALVEKPIPAKDIK--VISQGDAGDY---FYIVEKGNFVDVYI
--HSSGSV---QPGP-DGLGNKV-A---S-IGPG-GSFGEALALMYNAPRAATVISTEP--
-----K-SNLWALDRITFRRI-LMDSAFQRRRMYE-----
>PK_[Penicillium_italicum]_700494201
--SHLDDDQ---FLTVL-NALVEKPIPAKDIK--VISQGDAGDY---FYIVEKGNFDIYI
--HPSGAV---QSGP-DGLGNKV-A---S-TGPG-GSFGEALAL-----
-----
>PKA_[Acremonium_chrysogenum_ATCC_11550]_672795300
-----GDV---IIKEGDPGHS---FYLLESGEADAYK
--GD--N-----K-----V-L---H-YKKG-DYFGELALLNDAPRAASVIASS---
-----E-VKVATLGKSGFQRL-LGPVEGIMRR-----
>PKA_[Alternaria_alternata]_399971489
-LSTLTPYE---RSKIA-DALETKKYPPGTT---IIQEGDVGES---FFLLESGEAQVFK
----RGV-----D-----SAV-N---Q-YKKG-DYFGELALLNDAPRAASVISRT---
-----E-VKVATLGKNGFQRL-LGPVEG-----
>PKA_[Ascaris_suum]_541044944
-----GTH---VVEQGQPGDE---FFIIIVEGEANVLQ
--KRSDD-----APF-----ENV-G---H-LSSS-DYFGELALLLDRPRAATVVAK----
---T-H-LKCVKLDRARFERV-M-----
>PKA_[Aspergillus_calidoustus]_972231926
-----AGST---IISEGDPGDA---FYLLESGEAEAFK
----NGL-----EGP-----V-K---N-YKRG-DFFGELALLDEKPRAASIVA-RT--
-----E-VKVARLGRDGFKRL-LGPVEEIMRRAEYEEK-----
>PKA_[Aspergillus_clavatus_NRRL_1]_121705476
-----ANST---IIAEGDPGDA---FYLLEAGDAEAFM
----KGV-----EGP-----V-K---T-YKRG-DYFGELALLDEKPRAASVVA-KT--
-----D-VKVARLGRDGFKRL-LGPVQDIMRRAEYQAK-----
>PKA_[Aspergillus_fumigatus_Af293]_70999804
-----AGST---IIIEGAPGDA---FYLLESGEAEAFK
----KDV-----EGP-----V-K---S-YRRG-DFFGELALLDDKPRAASVVA-KT--
-----D-VKVARLGRDGFKRL-LGPVEDIMRRAEYSAK-----
>PKA_[Aspergillus_niger_CBS_513.88]_145252346
-----AGST---IIAEGDPGDA---FYLLESGEADAFK
----NGV-----EGP-----V-K---S-YKRG-DYFGELALLDDKPRAASIVA-KT--
-----E-VKVAKLGRDGFKRL-LGPVEDIMRRAEYESKPV-----
>PKA_[Aspergillus_ochraceoroseus]_816333989
-----AGST---IITEGDPGDA---FYLLESGEADAFK
----NGV-----DGP-----V-K---S-YKRG-DYFGELALLDDKPRAASIIT-RT--
-----D-VKVARLGRDGFKRL-LGPVEEIMRRAEY-----
>PKA_[Aspergillus_oryzae_RIB40]_169770467
-----AGSS---IIKEGDPGDA---FYLLESGEAEAFK
----EGV-----DRP-----V-K---S-YQRG-DYFGELALLDDQPRASIVA-KT--
-----D-VKVAKLGRDGFKRL-LGPVEDIMRRAEYE-Q-----
>PKA_[Aspergillus_ruber_CBS_135680]_599159193
-----AGST---IITEGDPGDA---FYLLESGEAEAYK
----EGE-----EGS-----V-K---D-YKRG-DYFGELALLDDKPRAASVIA-KT--
-----D-VKVARLGRDGFKRL-LGPVEKILRRTEYG-----
```



>PKA\_[Aspergillus\_terreus\_NIH2624]\_115396126  
 -----SGST---IITEGDPGDA---FYLLESGEAEAFK  
 ----EGV-----EGN-----V-K---S-YKRG-DFFGELALLDDKPRAASVVA-KT--  
 -----D-VKVARLGRDGFKRL-LGPVEDIMRRADYQTK-----  
 >PKA\_[Beauveria\_bassiana\_D1-5]\_701775066  
 -----GAV---IIEGDPGYS---FYLLLEDGTADAYK  
 --GD--I-----S-----NKV-L---Q-YKKG-DFFGELALLNDAPRAASVVATT---  
 -----D-VKVATLGKNAFQRL-LGPVEGILRRTKYQG-----  
 >PKA\_[Biomphalaria\_glabrata]\_908424905  
 -----MFPVHRHAGEV---IIQQGDEGDN---FYVIDQGEVDVYV  
 ----N-----G-----VHV-T---S-IGEG-GSFGELALIYGTTPRAATVKAKN---  
 -----D-VKLWGIDRDSYRRI-L-----  
 >PKA\_[Brettanomyces\_bruuxellensis\_AWRI1499]\_385302590  
 -LKSLSSYE---RSKLA-DALNTENYVEGKN---IVTQGEQGEN---FYFIENGTAADVIV  
 --DGK-V-----V-Q---K-LXKG-DYFGELALLYDSPRQATV-----  
 -----  
 >PKA\_[Caenorhabditis\_elegans]\_115534999  
 -----MFPVEKSAGET---IIEQGEEDN---FYVIDKGTVDVYV  
 ----N-----H-----EYV-L---T-INEG-GSFGELALIYGTTPRAATVIAKT---  
 -----D-VKLWAIDRLTYRRI-L-----  
 >PKA\_[Caenorhabditis\_remanei]\_71835967  
 -----MFPVEKAAQET---IIEQGEEDN---FYVIDKGTVDVYV  
 ----N-----H-----EYV-L---T-INEG-GSFGELALIYGTTPRAATVIAKT---  
 -----D-VKLWAIDRLTYRRI-----  
 >PKA\_[Calliphora\_vicina]\_158935664  
 -----  
 -----V-A---T-LKSG-DDFGKLALINDAPRAATIVLKEN--  
 -----N-CHLLRVDKEHFNRI-LRDVEANTLRLQEHGKDVLV---  
 >PKA\_[Candida\_albicans\_P87]\_712863295  
 -LKSLSDHA---RSKLA-DALSTEMYHKGDG---IVTEGEQGEN---FYLIESGNCQVYN  
 --EKLGN-----I-K---Q-LTKG-DYFGELALIKDLPRQATVEALDN--  
 -----VIVATLGKSGFQRL-LGPVVEVLKEQD-----  
 >PKA\_[Candida\_glabrata]\_961821097  
 -----AGDV---IIREGDRGEN---FYLIEYGACDVTK  
 --EKEGL-----V-T---Q-LKDH-DYFGEVALLNDLPRQATV-----  
 -----  
 >PKA\_[Capronia\_coronata\_CBS\_617.96]\_628231581  
 -----EAGTN---IITEGEPGDS---FYLLESGEAVAYK  
 ----HGV-----DKP-----V-K---E-YKRG-DFFGELALLDDKPRAASVVA-KT--  
 -----N-VKVARLGRDGFKRL-LGPVESIMRREEY-----  
 >PKA\_[Capronia\_epimycetes\_CBS\_606.96]\_628273410  
 -----AGTN---IITEGEPGDS---FYLLESGEAVAYK  
 ----QGI-----DKP-----V-K---E-YKRG-DFFGELALLDDKPRAASVVA-QT--  
 -----D-VKVARLGRDGFKRL-LGPVESIMRREEY-----  
 >PKA\_[Capsaspora\_owczarzaki\_ATCC\_30864]\_754346028  
 -----MVERHVPAGTT---IIKQGDEGDY---FYVVESGKFSVHV  
 ----ERD-----GVS-----KKV-V---E-VGPG-GGFGELALMYNSPRAATVIAD-E--  
 -----D-STVWGVDRVTFRRI-L-----  
 >PKA\_[Ceraceosorus\_bombacis]\_939395459  
 -----AGTR---VIEQGERGTE---FFIILDGHAEVQK  
 --RREQD-----GVE-----EAI-G---K-LAEG-DYFGELALLNNAPRAASIVAS----  
 ---SPA-LRLATLSESAFKRL-V-----  
 >PKA\_[Ceratocystis\_platani]\_814601286  
 -LSSLTPYE---RSKIA-DALEQERFSAGQS---IITEGDVGQT---FYIVESGEADALK

-----G-----D-----TIV-K---N-YKKG-EFFGELALLNDAPRAATVVART---  
-----N-TKVVSLGKSAFQRL-LGPVEG-----  
>PKA\_[Chaetomium\_thermophilum\_var.\_thermophilum\_DSM\_1495]\_576043404  
-----AGHT---IIREGDPGYD---FYLLSSEGEAVAYR  
--SDNDQ-----P-----V-K---H-YKKG-DYFGELALLNDAPRAASVVSTT---  
-----E-VKVARLGKSAFQRL-LGPVESIMRRQKY-----  
>PKA\_[Chrysochromulina\_sp.\_CCMP291]\_922861303  
-----VFEQGDQGST---FYIIYQGGVKVWV  
N---DGKGVSKVNDG--GYGTCV-A---T-LLEG-DSFGELALINGTRSGTAITTG---  
-----P-TQLLRVEKDAYD-----  
>PKA\_[Cladophialophora\_psammophila\_CBS\_110553]\_628318878  
-LSSLKPYERAKIADAL-ETVK---YESGQN---IITEGEPGDA---FYLLSSEGHAVAYK  
----HGV-----DHP-----V-K---E-YGRG-DFFGELALLDDKPRAASVVA-KD--  
-----N-VTVAKLGRDGFKRL-LGPVESIMRREEYE-----  
>PKA\_[Cladophialophora\_yegresii\_CBS\_114405]\_628289763  
-----FEPGQN---IITEGEPGDA---FYLLSSEGHAVAYK  
----HGV-----DHA-----V-K---E-YGRG-DFFGELALLDDKPRAASVIA-KD--  
-----N-VTVAKLGRDGFKRL-LGPVEGIMRREEYE-----  
>PKA\_[Colletotrichum\_gloeosporioides\_Nara\_gc5]\_596690365  
-----GET---IIKEGDPGHS---FYLLSSEGEADAYI  
--GD--S-----K-----EAV-K---H-YSKG-DFFGELALLNDAPRAASIVATT---  
-----D-VKVASLGKSAFQRL-LGPVEGIMRR-----  
>PKA\_[Colletotrichum\_gloeosporioides]\_375005170  
-----GET---IIKEGDPGHS---FYLLSSEGEADAYI  
--GD--S-----K-----EAV-K---H-YSKG-DFFGELALLNDAPRAASIVATT---  
-----D-VKVASLGKSAFQRL-LGPVEGIMRR-----  
>PKA\_[Colletotrichum\_nymphaeae\_SA-01]\_996635092  
-----GET---IIKEGDPGHA---FFLLSSEGEADAYK  
--GG--V-----K-----ESV-K---H-YSKG-DFFGELALLNDAPRAASIVATT---  
-----D-VKVASLGKNAFQRL-LGPVEGIMRRTKYEEV-----  
>PKA\_[Cordyceps\_confragosa\_RCEF\_1005]\_1025692434  
-----GAV---IIKEGDPGYS---FYLLDGTADAYK  
--GD--T-----N-----NKV-L---Q-YKKG-DFFGELALLNDAPRAASVVATT---  
-----D-VKVATLGKNAFQRL-LGPVEGILRRTKYQG-----  
>PKA\_[Cordyceps\_militaris\_CM01]\_573987763  
-----GAV---IIKEGDPGYS---FYLLDGTADAYK  
--GD--T-----S-----NKV-L---Q-YKKG-DFFGELALLNDAPRAASVVATT---  
-----D-VKVATLGKNAFQRL-LGPVEGILRRTKYQG-----  
>PKA\_[Crassostrea\_gigas]\_762095734  
--SHLDDNE---RSDIF-DAMFPVHRHAGEV---IIQQGDEGDN---FYVIDQGEVDIFV  
----N-----D-----EHV-T---T-IGEG-GSFGELALIYGTTPRAATVKAKG---  
-----D-VKLWIGIDRDSYRRI-LMGSTIRKRMYYEFLGKV----  
>PKA\_[Cryptococcus\_bacillisporus\_CA1280]\_757342465  
-----EVKANAGQM---VIEQGAAGDF---FYIVESGKLDVFI  
--KREGQILDLEKGDPRPGLGMKI-A---E-CSEG-SSFGEALMHNAPRAASIIISV-T--  
-----P-CTLWALDRVSFRTI-LLDHTSRKRRLYE-----  
>PKA\_[Cryptococcus\_tetragattii\_IND107]\_757381277  
-----EVKANAGQM---VIEQGAAGDF---FYIVESGKLDVFI  
--QREGQILDLEKGDPRPGLGMKV-A---E-CSEG-SSFGEALMHNAPRAASIVSV-T--  
-----P-CTLWALDRVSFRTI-LLDHTSRKRRLYE-----  
>PKA\_[Cryptosporidium\_muris\_RN66]\_209881331  
-----TV---IINQGDDGDK---LYIIIEKGQVDCFK  
--EFKDS-----SER-----KHL-C---S-LRSG-DAFGELALLYNCPRAAATVIASS---  
-----D-CLLWALDRETFNHI-VKGAAAKRIETY-----

```

>PKA_[Cryptosporidium_parvum_Iowa_II]_126651910
-----IFEDGQE---IIKQGEQGDT---FYLIITGNAVALK
--DNVE-----VM-----S-YKRG-DYFGELALLRNAPRAATVKARG---
-----R-CKVAYLDRKAFKRV-LGPIE-----
>PKA_[Curvularia_lunata]_565619410
--LSTLTPYE---RSKIA-DALETKKYPPGTT---IIQEGDVGES---FFLLEAGEAQVFK
----RGV-----D-----GPV-N---Q-YQKG-DYFGELALLNDAPRAASVISKT---
-----E-VKVATLGKNGFQRL-LGPVEG-----
>PKA_[Danaus_plexippus]_357624754
-----MFPVQCLQGET---VIRQGDEGDN---FYIIDSGEVEVLV
----N-----G-----EPV-T---T-IGEG-GSFGELALIYGTPRAATVRART---
-----P-LKLWGLDRDSYRRI-L-----
>PKA_[Diaporthe_ampelina]_821076706
-----GTA---VIKEGDPGYD---FYLLESGECDAYK
--EGVHK-----ERI-----N-L-R---H-YEKG-DFFGELALLNDAPRAATVVSVT---
-----E-VKVAKLGKNAFNRL-LGPVESIMRR-----
>PKA_[Dictyostelium_purpureum]_330841828
-----KAGDI---IIKQGDEGDL---FYVVDKGICDIYV
--STNGS-----TP-----TLV-M---E-VFEG-GSFGELALIYGSPRAATVIART---
-----D-VRLWALNGSTYRRI-LMDQTIRKRRLYEE-----
>PKA_[Drosophila_melanogaster]_28574658
--AHLDESE---RSDIF-DAMFPVNHIAGEN---IIQQGDEGDN---FYVIDVGEVDVVFV
----N-----S-----ELV-T---T-ISEG-GSFGELALIYGTPRAATVRAKT---
-----D-VKLWGIDRDSYRRI-L-----
>PKA_[Echinococcus_granulosus]_576698744
-----MFPLHRSRGDI---IIKQGDDGDN---FYIIDQGKVDIYV
----N-----G-----EFV-S---C-IGEG-GSFGELALIYGTPRAATVKAHS---
-----DEVKLWGIDRDSYRRI-LMGSTIRRRKMYQDFL-----
>PKA_[Eimeria_necatrix]_921116540
-----AGDT---IIREGEAGDT---FYLLLDGEAEAVK
--GGKV-----V-M---K-YSRG-SYFGELALLKNQPRAAATVTAK----
---T-D-CKVAYMDRRSFKRL-LGPLEGLLMRNMDHYRAV-----
>PKA_[Eimeria_tenella]_916419130
-----AGDT---IIREGEAGDT---FYLLLDGEAEAVK
--GGKV-----V-M---K-YSRG-SYFGELALLKNQPRAAATVTAK----
---T-D-CKVAYMDRRSFKRL-LGPLEGLLMRNMDHYRAV-----
>PKA_[Exophiala_dermatitidis_NIH/UT8656]_684170162
-----AGTN---IITEGEPGDS---FYLLEAGEAAAYK
----QGI-----DGP-----V-K---E-YKRG-DFFGELALLDDKPRAAASVVA-KT--
-----D-VKVAKLGREGFKRL-LGPVESIMRREEY-----
>PKA_[Fusarium_avenaceum]_751358440
-----GEV---IINEGDPGHA---FYLLESGEADAYI
--GQ--P-----D-----NKV-R---H-YKKG-DYFGELALLNDAPRAASIVASS---
-----A-VKVGSLGKNAFQRL-LGPVEGILRR-----
>PKA_[Fusarium_langsethiae]_927760275
-----GEI---IINEGDPGHA---FYLLESGEADAYI
--GQ--S-----D-----NKV-R---H-YKKG-DYFGELALLNDAPRAASIVATS---
-----T-VKVGSLGKNAFQRL-LGPVEGILRRTKYQG-----
>PKA_[Fusarium_oxysporum_f._sp._cubense_race_4]_475665949
--LASLNPYE---RSKIA-DALETKKFAAGEV---IINEGDPGHA---FYLLESGEADAYI
--GQ--P-----D-----NKV-R---H-YKKG-DYFGELALLNDAPRAASIVATS---
-----P-VKVGSLGKNAFQRL-LGPVEGILRRTK-----
>PKA_[Gaeumannomyces_graminis_var._tritici_R3-111a-1]_685408583
-----QGDVG DY---FYVVEKGSFNVYK

```

```

--NPTGA---MQPGP-DGLGKHE-G---T-VAEG-GYFGEIALMHNALRNATVMSAEA--
-----N-CVLWALDRVTFNRI-LMETNSARYQMYDK-----
>PKA_[Hammondia_hammondi]_675125108
-----GDV---IIREGETGDT---FYILLEGAEEAIK
--NDKV-----V-M---E-YKKG-GFFGELALLKDQPRAA TVVAK----
---S-H-VQVAYMDRKSFKRL-LGPVEQILMRNQDN-----
>PKA_[Hanseniaspora_valbyensis_NRRL_Y-1626]_1037355805
--LSNLTESE---RNKLI-DVLKIKTVPKGSV---IIRQGEMGEN---FYIIEQGSCVVIK
----DN-----V-----E-L-K---A-LHKN-DYFGELALLDDSPRAATVVASSEE-
-----G-CKLVYLGKSEFKRL-L-----
>PKA_[Kluyveromyces_marxianus_DMKU3-1042]_574141192
----LSTYD---RAKLA-DALDTEYYEAGDV---IIEGDTGEN---FYFIEYGAEVSK
----EN-----Q-----GVI-T---K-LGKG-DYFGEVALLNDLPRQATV-----
-----
>PKA_[Lasius_niger]_861608592
-----PGEA---IIRQGDEGDN---FYVIDQGEVEIFV
----N-----G-----ELA-T---T-IGEG-GSFGELALIYGT PRAATVRAKT---
-----D-VKLWGIDRDSYRRI-L-----
>PKA_[Leptosphaeria_maculans_JN3]_396496360
--LSTLTPYE---RSKIA-DALETKKYPPGST---IIQEGDVGES---FYLLESGDAQVFK
----RGI-----E-----TAV-K---E-YTKG-DYFGELALLNDAPRAASVVSRT---
-----E-VKVATLGKNGFQRL-LGPVEG-----
>PKA_[Lichtheimia_corymbifera_JMRC:FSU:9682]_661180422
-----MAEKR VKSGEE---VIEQGAQGDY---YYVVEQGTFDCLI
----NGNK-----V-T---S-YGPG-GSFGELALMYNAPRAATIVATS---
-----D-GVLWALDRITFRSI-LMDSTARKRRMYEQ-----
>PKA_[Limulus_polyphemus]_926620498
-----V---IIHQGDEGDN---FYVIDQGEVEVFV
----N-----G-----QMV-T---T-IGEA-GSFGELALIYGT PRAATVKAKT---
-----N-VKLWAIDRDTYRRI-LMGSTIRKRMYYEEFL-----
>PKA_[Lingula_anatina]_919061114
-----SGEV---IIQQGDEGDN---FYVIDQGEVDIYV
----N-----N-----EHV-T---N-IGEG-GSFGELALIYGT PRAATVKAKT---
-----D-VKLWGIDRQTYRRI-LMGSTM R-----
>PKA_[Loa_loa]_312084002
-----MFPVEKKKGET---IIEQGEEGDN---FYVIDSGEVDVVF
----N-----G-----EYA-L---S-IKEG-GSFGELALIYGT PRAATVVAKSD---
-----V-VKCWAIDRITYRQI-L-----
>PKA_[Lycosa_singoriensis]_161669170
--AHLDDTE---RSDIF-DAMFPVVHKAGEV---IITQGDQGDN---FYVIDQGEVEVFV
----N-----G-----QLV-V---T-IGEA-GSFGELALIYGT PRAATVKAKI---
-----D-CKLWAIDRDTYRRI-L-----
>PKA_[Madurella_mycetomatis]_1003743647
--LSSLTPYE---RSKIA-DALESQKFPAGHT---IIREGDPGHS---FFLLESGEAVAYR
--AGNET-----P-----V-K---H-YKKG-DFFGELALLNDAPRAASVVSET---
-----E-VKVATLGKSAFQRL-LGPVEGIMRRTK-----
>PKA_[Magnaporthe_oryzae_70-15]_389635839
-----GTV---VIKEGDPGED---FYLLCEGAEAEAFK
----AGI-----D-----QPV-K---L-YKKG-DFFGELALLNDAPRAASVVSKT---
-----E-VKVAALGKSAFQRL-LGPVE-----
>PKA_[Magnetosporillum_gryphiswaldense_MSR-1]_144898590
-----AGQK---VFGE GDSGDR---AYLIQEGSVEISK
----HGLV-----L-A---T-LNKG-ELFGEMALVDDQPRMAT-----
-----

```

>PKA\_[Marssonina\_brunnea\_f.\_sp.\_'multigermtubi'\_MB\_m1]\_597579793  
-----AGTT---IIKEGDAGEA---FYLLESGEAEAYK  
----MDV-----Q-----NPV-K---S-YKKG-DFFGELALLNDAPRAASVVSKT---  
-----E-VKVATLGKDGfQRL-LGPVESIMRRTTYDHG-----  
>PKA\_[Metarhizium\_album\_ARSEF\_1941]\_734659332  
-----GDV---IIREGDQGHA---FFLLESGEADAFK  
--GDQSN-----K-----V-L---H-YKKG-DFFGELALLNDKPRAASVVAST---  
-----E-VKVATLGKHAFQRL-LGPLEG-----  
>PKA\_[Metarhizium\_anisopliae]\_672378012  
-LSSLTPYE---RSKIA-DALETKKYTPGEI---IIREGDPGHS---FFLLESGEADAFK  
--GDQSN-----K-----V-L---H-YKKG-DFFGELALLNDQPRAASVMAS---  
-----E-VKVATLGKNAFQRL-LGPVEG-----  
>PKA\_[Metarhizium\_robertsii\_ARSEF\_23]\_629717739  
-LSSLTPYE---RSKIA-DALETKKYAPGEI---IIREGDPGHS---FFLLESGEADAFK  
--GDQSN-----K-----V-L---H-YKKG-DFFGELALLNDQPRAASIMAS---  
-----E-VKVATLGKNAFQRL-LGPVEG-----  
>PKA\_[Mitosporidium\_daphniae]\_914960361  
-----V---VIREGDIGDS---FYIVSQGNANVCI  
----NGK-----QEK-----SLV-I-----G-DYFGEMSLITKQPRAATVIAQSN---  
-----P-LSVLRIEVDFAFNRL-L-----  
>PKA\_[Mucor\_ambiguus]\_758351316  
-----EKRVAKGTT---VIEQGDVGDF---FYVVESGTLDCFI  
----GQNK-----V-T---N-YEAG-GSFGELALMYNAPRAATIITTS---  
-----D-SVLWALDRITFRIT-LMENTSRRKRRMYEY-----  
>PKA\_[Mucor\_circinelloides\_f.\_circinelloides\_1006PhL]\_511004461  
-----GQE---VVKQGDVGdQ---FYIIIESGEAIVLK  
--EENGIIQQQ-----V-N---Q-LERG-SYFGELALLNDAPRAATVV-----  
-----  
>PKA\_[Mucor\_racemosus]\_119712284  
-----GQE---VVKQGDVGdQ---FYIIIESGEAIVLK  
--EENGIVQQQ-----V-N---Q-LERG-SYFGELALLNDAPRAATVV-----  
-----  
>PKA\_[Neofusicoccum\_parvum\_UCRNP2]\_615406214  
-LSSLTPYE---RSKIA-DALETKKYPAGTT---IIQEGDVGES---FYIILETGEAEVYK  
----RGI-----D-----KPV-K---R-YSKG-DYFGELALLNDAPRAASVVSTR---  
-----E-IKVATLGKDGfQRL-LGPVEG-----  
>PKA\_[Neonectria\_ditissima]\_936414681  
-----SGEI---IIKEGDPGHA---FYLLENGQAAAYK  
--GD--P-----S-----NKV-L---D-YDKG-DYFGELALLNDAPRAASVVATT---  
-----D-VKVASLGKNAFQRL-LGPVEGIMRRTTE-----  
>PKA\_[Neospora\_caninum\_Liverpool]\_401405056  
-----GDV---IIKEGETGDT---FYIILEGTAEAIK  
--NDKV-----V-M---E-YKKG-GFFGELALLKDQPRAATVVAK----  
---S-H-VQVAYMDRKSFKRL-LGPVEQILMRNQDN-----  
>PKA\_[Neurospora\_tetrasperma\_FGSC\_2508]\_698982218  
-----AGHE---IILEGDPGHS---FFLLEAGEAAAFK  
--RG--N-----D-----SPV-K---N-YKKG-DFFGELALLNDAPRAASVISQT---  
-----E-VKVARLGKNAFQRL-LGPIESILRR-----  
>PKA\_[Octopus\_bimaculoides]\_961135686  
--SHLDDNE---RSDIF-DAMFPVHRHAGEV---IIQQGDDGDN---FYVIDQGEVDVYV  
----N-----N-----EHV-T---T-IGEG-GSFGELALIYGIPRAATVKAKN---  
-----D-VKLWGIIDRDSYRRI-L-----  
>PKA\_[Ogataea\_parapolyomorpha\_DL-1]\_927375419  
----LSSYE---RSKLA-DALNSEFYSVGQN---VVTEGEAGEN---FYFIESGTADVIK

```

--SGEGV-----V-S---K-LNKG-DYFGELALLYDSRQATV-----
-----
>PKA_[Ophiocordyceps_sinensis_C018]_531867378
-----GEI---IIEGDPGHS---FYLLESGEAVAYK
--GD--P-----S-----NRL-L---Q-YKKG-DYFGELALLNDAPRAASIMAST---
-----D-VKVASLGKNAFQRL-LGPVEGILRRTK-----
>PKA_[Ophiostoma_piceae_UAMH_11346]_512187331
-----GTN---IIEGDPGHA---FFLVESGEADAIAK
--SG--V-----P-----DPV-L---H-YKKG-DFFGELALLNDAPRAATIVAKT---
-----D-VKVATLGKSAFQRL-LGPVEGIMRR-----
>PKA_[Oryctolagus_cuniculus]_6002552
-----AGET---VIQQGDEGDN---FYVIDQGEMDVYV
----N-----N-----EWA-T---S-VGEG-GSFGELALIYGTTPRAATVKAKT---
-----N-VKLWGIDRDSYRRI-L-----
>PKA_[Paramecium_tetraurelia]_1513244
-----ELAIVIDAMEEKKFKAGDF---VIKQGDDGDV---LYVVDQGQLDCFK
VFKKGEP-----E-----KHL-K---V-YQPG-ESFGELALLYNVPRATIKAKT---
-----D-AICFSLDRETFNHI-VKDAAAK-----
>PKA_[Pediculus_humanus_corporis]_242003576
-----AGSV---ILKQGDEGSL---FYIITGGTVSVTI
--TQPD-----GTV-KQGPI-LKTG-DFFGEKALLKDEKRAATVIAQEP--
-----G-VECLTLDRIF-----
>PKA_[Penicillium_digitatum_Pd1]_953384115
-----ANST---IIEGDPGDA---FYLLESGEAEATK
----NGV-----S-----GPV-K---N-YHRG-DYFGELALLDDKPRQASITT-KT--
-----D-VKVARLGRDGFKRL-LGPVEGMMRGAEY-----
>PKA_[Penicillium_roqueforti_FM164]_584417054
-----SI---IIEGDPGDA---FYLLESGEAEATK
----NGV-----S-----GPV-K---S-YHRG-DYFGELALLDDKPRQASITT-KT--
-----D-VKVARLGRDGFKRL-LGPVEGMMRGAEYELD-----
>PKA_[Perkinsus_marinus_ATCC_50983]_294899358
-----GEV---VCHKGEEGNE---FFLIFHGAVNIFP
--VPGEKP-----V-A---T-YVAG-ETFGEALLHDAPRAATVV-----
-----
>PKA_[Phaeoacremonium_minimum_UCRPA7]_631232375
--LSTLTPYE---RSKIA-DALETQKYPPGTE---IIREGDPGTD---FFLLESGECDAYK
----TGN-----P-----NSV-K---H-YARG-DFFGELALLNDAPRLASVVSKT---
-----E-VKVAALGKSAFQRL-LGPVESIMRRTK-----
>PKA_[Phaeomoniella_chlamydospora]_821066414
-----AGSK---IINEGDPGDA---FYLLESGEAEAFK
----AGV-----EKP-----V-K---A-YSRG-DYFGELALLDDKPRASVIA-KT--
-----S-VKVARLDREGFKRL-LGPVESIMRREDY-----
>PKA_[Plasmodium_berghiei_ANKA]_675229101
-----AGDV---IINEGEQGDT---FYILTDGNATALK
--NCQ-----II-K---T-YTKG-DYFGELALLRNQPRATVKAES---
-----T-CQVVYLERKGFKRL-LGPIEKILIRNVENYKKVL----
>PKA_[Plasmodium_chabaudi_chabaudi]_56522589
-----AGDI---IINEGERGDT---FYILTYGNATALK
--SDQ-----VI-K---T-YTKG-DYFGELALLRNKPRAATVKADG---
-----V-CQVVYLERKGFKRL-LGPIEKILIRNVENYKQVL----
>PKA_[Plasmodium_coatneyi]_1042343877
-----I---IIEGEPGDT---FYIIIEGNALAIK
--GKT-----VI-K---T-YSKG-DYFGELALLKNKPRAATVKAKD---
-----S-CQVVYLDRKSFKRL-LGPIEEILHRNVENYRKVL----

```

```

>PKA_[Plasmodium_gaboni]_1011103433
-----GEI---IIEGEGEGDT---FFILIDGNAVASK
--DNK-----VI-K---T-YAKG-DYFGELALLKNKPRAATIKAQN---
-----F-CQVVYLDKRSFKRL-LGPIEDILHRNVENYKQVL-----
>PKA_[Plasmodium_inui_San_Antonio_1]_672187601
-----IIEGEGQGD---FYIIIDGKALAIK
--DKK-----VI-K---T-YSKG-DYFGELALLKNQPRAATVKAKD---
-----T-CQVVYLDKRSFKRL-LGPIEEILYRNVENYRKVL-----
>PKA_[Plasmodium_knowlesi_strain_H]_1041816653
-----V---IIEGEPGDT---FYIIVDGSALAIK
--DKT-----VI-K---T-YSKG-DYFGELALLKNQPRAATVKAKD---
-----S-CQVVYLDKRSFKRL-LGPIEEILHRNVENYKKVL-----
>PKA_[Plasmodium_malariae]_1037137315
-----GDI---IINEGEGQGD---FYILIEGNATALK
--DNK-----VI-K---T-YNKG-DYFGELALLKNQPRAATVKAQN---
-----T-CQVVYLDKRSFKRL-LGPIEEILHRNVENYKKVL-----
>PKA_[Plasmodium_ovale_curtisi]_1036545630
-----GDI---IINEGEGQNT---FYILIDGNATALK
--DNK-----VI-K---T-YNKG-DYFGELALLKNQPRAATVKAQN---
-----N-CQVVYLDKRSFKRL-LGPIEKILYRNVENYKKVL-----
>PKA_[Plasmodium_vinckei_petteri]_577151418
-----KTGDI---IINEGEGQGD---FYILIDGKATALK
--SDQ-----VI-K---T-YAKG-DYFGELALLRNQPRAATVKAES---
-----T-CQVVYLERKGFKRL-LGPIEKILIRNVENYKQVL-----
>PKA_[Plasmodium_vivax_Sal-1]_156103253
-----IIEGEPGDT---FYIIVEGNALAIK
--DKT-----VI-K---T-YGKG-DYFGELALLKNKPRAATVKAKD---
-----T-CQVVYLDKRSFKRL-LGPIEEILHRNVENYRQVL-----
>PKA_[Plasmodium_yoelii_yoelii_17XNL]_83318121
-----GDI---IINEGEGQGD---FYILIDGKATALK
--NGQ-----VI-K---T-YTKG-DYFGELALLRNQPRAATVKAES---
-----T-CQVVHLERKGFKRL-LGPIEKILIRNVENYKKVL-----
>PKA_[Plasmodium_yoelii]_675234964
-----GDI---IINEGEGQGD---FYILIDGKATALK
--NGQ-----VI-K---T-YTKG-DYFGELALLRNQPRAATVKAES---
-----T-CQVVHLERKGFKRL-LGPIEKILIRNVENYKKVL-----
>PKA_[Priapulus_caudatus]_957826758
-----MFPVHHKAGEV---VIQQGDEGDN---FYVIDDGQVDIYV
----N-----D-----KHV-V---A-VSEG-GSFGELALIYGTTPRAATVKAKT---
-----D-LKLWGIDRDSYRRI-LMGSTIRKRMKMYEDFL-----
>PKA_[Pyrenophora_tritici-repentis_Pt-1C-BFP]_189192997
-----GTT---IIQEGDVGES---FFLLESGEAQVFK
----RGI-----D-----SAV-R---E-YHKG-DYFGELALLNDAPRAASVVSKT---
-----E-VKVATLGKNGFQRL-LGPVEGIMRR-----
>PKA_[Riptortus_pedestris]_501292686
-----GET---IIQQGDEGDN---FYVIDQGEVEVYV
----N-----S-----ELV-T---T-IGEG-SSFELALIYGTTPRAATVKAKT---
-----A-VKLWGIDRDSYRRI-LMGSTIRKRMKMYE-----
>PKA_[Rosellinia_necatrix]_949385799
-----AGTT---IIRQGDIGQE---FYLVESGEADAFK
--NG--E-----P-----DSV-K---H-YEKG-DFFGELALLNDAPRAASVISAT---
-----E-IKVATLGKSAFARL-LGPVEGIMRRTRYIGVV-----
>PKA_[Saccharomyces_cerevisiae_S288c]_6322156
-----QPGET---IIREGDQGEN---FYLIEYGAVDVSK

```

```

--KGQGV-----I-N---K-LKDH-DYFGEVALLNDLPRQATV-----
-----
>PKA_[Schistocerca_gregaria]_311359099
-----MFPVNALPGET---IIQQGDEGDN---FYVIDQGEVEVFV
----N-----S-----ELV-T---T-IGDG-GSFGEALALIYGTTPRAATVRAKT---
-----D-VKLWGIDRDSYRRI-L-----
>PKA_[Schistosoma_haematobium]_844855164
-----MFPVHRNSGDV---IIQQGDEGDN---FYIIDQGEVDIFL
----N-----N-----EYS-S---T-IGEG-GSFGEALALIYGTTPRAATVRAKT---
-----E-VKLWGIDRDSYRRI-L-----
>PKA_[Schizosaccharomyces_cryophilus_OY26]_891585810
-----AGGI---VIRQGDIGNQ---FYLIEDGEAEVCK
----EG-----K-----GVV-V---T-LGKG-DYFGEALALIHETERTATVRAKT---
-----R-LKLATFDKPTFNRL-L-----
>PKA_[Schizosaccharomyces_japonicus_yFS275]_213403454
--LSKLSNIE---RQKIA-DALQTVVYPEGSI---VVRQGDEGEN---FYLIESGEAEVIK
----EG-----Q-----GVI-A---I-LTKG-EYFGEALALIYKTVRNATVRART---
-----R-LKLATFDKAAFNRL-LGNVIDTMR-----
>PKA_[Spathaspora_passalidarum_NRRL_Y-27907]_598068477
----LSDHE---RSKLA-DALWTEMYHAGDK---IVTEGDQGEN---FYLIESGNCDVYS
--QSGGH-----L-A---R-LTKG-DYFGEVALLNDLPRQATVQALDN--
-----VIVATLGKSGFQRL-L-----
>PKA_[Sporothrix_brasiliensis_5110]_748537701
--LATLTPYE---RSKIA-DALETQKFAAGAT---IIREGDLGHS---FYLVESGEATVYK
--SGTES-----P-----V-K---H-YQKG-DFFGEALALLNDAPRAATIVAKT---
-----D-IKVATLGKSAFQRL-LGPVEGIMRRTR-----
>PKA_[Stegodyphus_mimosarum]_675373908
--AHLDDTE---RSDIF-DAMFPVVHSAGET---IIQQGDQGDN---FYVIDQGEVEVFV
----N-----G-----QLV-T---T-IGEG-GSFGEALALIYGTTPRAATVRAKT---
-----D-CKLWAIDRDTYRRI-L-----
>PKA_[Sugiyamaella_lignohabitans]_1026313839
-----VYEPGSV---VIREGDKGDE---FYLIESGTATVSK
--ANEGT-----V-S---E-LKKG-DYFGEVALLHDSRQATV-----
-----
>PKA_[Talaromyces_cellulolyticus]_748554364
-----AGST---IIREGDPGDA---FYLLESGEAEAVK
----AGT-----T-----V-K---E-YSRG-DYFGEALALLDDKPRAASVMA-KT--
-----D-VKVARLGRDGFKRL-LGPVEQIMRRTEY-----
>PKA_[Talaromyces_marneffeii_ATCC_18224]_212528198
-----AGST---IIHEGDPGDA---FYLLEAGEAEAVK
----AGT-----R-----V-K---D-YSRG-DYFGEALALLDDKPRAASVMA-KT--
-----D-VKVARLGRDGFKRL-LGPVEQIMRRTEY-----
>PKA_[Talaromyces_stipitatus_ATCC_10500]_242767083
-----AGST---IIREGDPGDS---FYLLESGEAEAVK
----AGT-----T-----V-K---E-YSRG-GYFGEALALLDEKPRAASVIA-KT--
-----D-VKVARLGRDGFKRL-LGPVEQIMRRTEY-----
>PKA_[Tetrahymena_thermophila_SB210]_146161423
-----EKKFKAGET---IIKQGDDGDE---LYVVDSGLLDICYK
--EKANQ-----E-----KILLK---T-YKEG-EAFGEALALLYNAPRAATIIAKT---
-----D-CILFSLDRPTFNHI-VKDAAK-----
>PKA_[Theileria_annulata_strain_Ankara]_84994998
-----QGEPGSS---LFMVLEGQAESFV
--ENK-L-----V-K---S-YNPG-DYFGEIGFILKKPRASTVKAKGK--
-----CLFVELERENFINL-LGPME-----

```



```

>PKA_[Theileria_orientalis_strain_Shintoku]_697890559
-----ANAGDV---LVKQGDDGDK---LYLIESGTADVTR
--SSKLS-----G-N-----EFL-T---T-LKDG-DYFGELALMYNAPRAATVTA-KT--
-----E-MRLWTLDRRTTFNYV-VK-----
>PKA_[Theileria_parva_strain_Muguga]_71030836
-----QGEPGSS---LFMVLEGQAESFV
--ENK-L-----V-K---S-YNPG-DYFGEIGFILKKPRASTVKAK----
-----LERENFINL-----
>PKA_[Tolypocladium_ophioglossoides_CBS_100239]_908388170
-LSSLTPYE---RSKIA-DALETQKFAPGEI---IIKEGDPGHS---FYLLESGEADAYK
--GDSNN-----K-----V-L---H-YKKG-DFFGELALLNDAPRAASVVASS---
-----D-VKVATLGKNAFQRL-LGPVEG-----
>PKA_[Torrubiella_hemipterigena]_729181934
-----AGEL---IIKEGDPGYS---FYLLESGEADAYI
--GEPGN-----K-----V-K---H-YTKG-DYFGELALLNDEPRAASVVAGT---
-----D-VKVATLGKNAFQRL-LGPVEGIMRR-----
>PKA_[Toxocara_canis]_734555419
-----MFPVEKKKGET---IIEQGEEGDN---FYVIDSGEVDVVFV
----N-----N-----EYA-V---S-IKEG-GSFGELALIYGTTPRAATVIAKSD--
-----V-VKCWAIDRITYRQI-L-----
>PKA_[Toxoplasma_gondii_ARI]_1005150459
-----GDV---IIKEGETGDT---FYILLEGAAEAIAK
--NDKV-----V-M---E-YKKG-GFFGELALLKDQPRATTVVAK----
---S-H-VQVAYMDRKSFKRL-LGPVEQILMRNQDN-----
>PKA_[Toxoplasma_gondii_FOU]_672257803
-----GDV---IIKEGETGDT---FYILLEGAAEAIAK
--NDKV-----V-M---E-YKKG-GFFGELALLKDQPRATTVVAK----
---S-H-VQVAYMDRKSFKRL-LGPVEQILMRNQDN-----
>PKA_[Toxoplasma_gondii_GAB2-2007-GAL-DOM2]_672257581
-----GDV---IIKEGETGDT---FYILLEGAAEAIAK
--NDKV-----V-M---E-YKKG-GFFGELALLKDQPRATTVVAK----
---S-H-VQVAYMDRKSFKRL-LGPVEQILMRNQDN-----
>PKA_[Toxoplasma_gondii_MAS]_672560367
-----GDV---IIKEGETGDT---FYILLEGAAEAIAK
--NDKV-----V-M---E-YKKG-GFFGELALLKDQPRATTVVAK----
---S-H-VQVAYMDRKSFKRL-LGPVEQILMRNQDN-----
>PKA_[Toxoplasma_gondii_ME49]_237834899
-----GDV---IIKEGETGDT---FYILLEGAAEAIAK
--NDKV-----V-M---E-YKKG-GFFGELALLKDQPRATTVVAK----
---S-H-VQVAYMDRKSFKRL-LGPVEQILMRNQDN-----
>PKA_[Toxoplasma_gondii]_12698442
-----GDV---IIKEGETGDT---FYILLEGAAEAIAK
--NDKV-----V-M---E-YKKG-GFFGELALLKDQPRATTVVAK----
---S-H-VQVAYMDRKSFKRL-LGPVEQILMRNQDN-----
>PKA_[Tribolium_castaneum]_642916971
-----MFPVTCLPGEA---IIQQGDEGDN---FYVIDQGEVEVYV
----N-----N-----ELV-T---T-IGDG-GSFGELALIYGTTPRAATVKAKT---
-----D-VKLWGIDRDSYRRI-LMGSTIRKRKMYEE-----
>PKA_[Trichinella_papuae]_954602153
--AHLDENE---KKDIF-NAMFPVEANAGEV---IIQQGDEGDN---FYVIDSGEVEVFV
----N-----N-----KSV-T---T-IKEN-GSFGELALIYGTTPRAATVLAKT---
-----R-VKLWALDRDITYRRI-L-----
>PKA_[Trichinella_patagoniensis]_954351355
--AHLDENE---KKDIF-NAMFPVEANAGEV---IIQQGDEGDN---FYVIDSGEVEVFV

```

-----N-----N-----KSV-T---T-IKES-GSFGELALIYGTTPRAATVLAKT---  
-----R-VKLWALDRDTRRI-L-----  
>PKA\_[Trichinella\_sp.\_T8]\_954620704  
--AHLDENE---KKDIF-NAMFPVEANAGEV---IIQQGDEGDN---FYVIDSGEVEVFV  
-----N-----N-----KSV-T---T-IKES-GSFGELALIYGTTPRAATVLAKT---  
-----R-VKLWALDRDTRRI-L-----  
>PKA\_[Trichinella\_sp.\_T9]\_954270144  
--AHLDENE---KKDIF-NAMFPVEANAGEV---IIQQGDEGDN---FYVIDSGEVEVFV  
-----N-----N-----KSV-T---T-IKES-GSFGELALIYGTTPRAATVLAKT---  
-----R-VKLWALDRDTRRI-L-----  
>PKA\_[Trichinella\_zimbabwensis]\_954489314  
--AHLDENE---KKDIF-NAMFPVEANAGEV---IIQQGDEGDN---FYVIDSGEVEVFV  
-----N-----N-----KSV-T---T-IKEN-GSFGELALIYGTTPRAATVLAKT---  
-----R-VKLWALDRDTRRI-L-----  
>PKA\_[Valsa\_mali\_var.\_pyri]\_972126529  
-----GTA---IINQGDPGYD---FYLLESGECDAYK  
--EGVHK-----ERI-----N-L-R---H-YEKG-DFFGELALLNDAPRAATVSSVT---  
-----E-VKVAKLKGNAFQRL-LGPVESIMRR-----  
>PKA\_[Valsa\_mali]\_972146471  
-----GTA---IINQGDPGYD---FYLLESGECDAYK  
--EGVHK-----ERI-----N-L-R---H-YEKG-DFFGELALLNDAPRAATVSSVT---  
-----E-VKVAKLKGNAFQRL-LGPVESIMRR-----  
>PKA\_[Vicugna\_pacos]\_560996168  
-----K-AGET---IIEQGEEDGN---FYVIDKGVVDVVFV  
-----N-----N-----EFV-L---T-INEG-GSFGELALIYGTTPRAATVVAKT---  
-----D-VKLWALDRDTRRI-L-----  
>PKA\_[Wallemia\_mellicola\_CBS\_633.66]\_588257012  
-----V---VISQGDGTGA---FYFVEQGEADI IK  
--NGEK-----V-G---S-YKKG-DYFGELALLNSAPRAATVKASENQ  
TAEN-Q-LKVVALDAPAFTRL-LGPVRDIMAR-----  
>PKA\_[Wickerhamomyces\_ciferrii]\_754419701  
-LSRLSLFE---RSKLA-DALETESYKSGDV---IIKEGEVGEN---FYLVENGEADV IK  
-----NQ-----G-----GLI-G---H-VKRG-DYFGEVALLNDTPRQASIVAKT---  
-----D-VQVATLDRKGFQRL-L-----  
>PKA\_[Xenopus\_laevis]\_147898518  
-FAHLDDTE---RSDIF-DAMFSVTYISGET---VIQQGDEGDN---FYVVDQGEVDVYV  
-----N-----N-----EWM-T---S-IGEG-GSFGELALIYGTTPRAATVKAKT---  
-----N-VKLWGIDRDSYRRI-L-----  
>PKA\_[Xylona\_heveae\_TC161]\_1018267199  
-LSSLTPYE---RSKIA-DALDAQYPPGST---IIKEGDPGEA---FYIIENGEAEVFK  
-----RGT-----E-----KAV-H---K-YKKG-DYFGELALLNDAPRAASVISKT---  
-----E-VKVATLGKDGQRL-LGPVEG-----  
>PKA\_[Zygosaccharomyces\_bailii\_ISA1307]\_578050454  
-----LYEPGQV---IIREGDVGEN---FYLIEYGECDVSK  
--KGKGV-----I-N---H-LKSH-DYFGEIALLKDLPRQATV-----  
-----  
>PKA1\_[Acanthisitta\_chloris]\_677990740  
-----THIAGET---VIQQGDEGDN---FYVIDQGEVDVYV  
-----N-----G-----EWV-T---S-IGEG-GSFGELALIYGTTPRAATVKAKT---  
-----D-LKLWGIDRDSYRRI-LMGSTLRKRKMYEEFL-----  
>PKA1\_[Acinonyx\_jubatus]\_961715909  
-FAHLDDNE---RSDIF-DAMFPVTHIAGET---VIQQGDEGDN---FYVIDQGEVDVYV  
-----N-----G-----EWV-T---S-ISEG-GSFGELALIYGTTPRAATVKAKT---  
-----D-LKLWGIDRDSYRRI-L-----

>PKA1\_[Acropora\_digitifera]\_1005430447  
-----QGEHGDE---FYIIVDGVAVVLQ  
--RRSIN-----EDF-----IEV-S---R-LGQS-DYFGEIALVLNRPRAATVRAK----  
---G-T-LTCVKLDRQRFERV-L-----  
>PKA1\_[Alligator\_mississippiensis]\_951062238  
--AHLDDNE---RSDIF-DAMFPVTHIAGET---VIQQGDEGDN---FYVIDQGEVDVYV  
----N-----G-----EWV-T---S-IGEG-GSFGELALIYGTTPRAATVKAKT---  
-----D-LKLWGIDRDSYRRI-L-----  
>PKA1\_[Alligator\_sinensis]\_944356250  
--AHLDDNE---RSDIF-DAMFPVTHIAGET---VIQQGDEGDN---FYVIDQGEVDVYV  
----N-----G-----EWV-T---S-IGEG-GSFGELALIYGTTPRAATVKAKT---  
-----D-LKLWGIDRDSYRRI-L-----  
>PKA1\_[Amazona\_aestiva]\_944298418  
--AHLDDNE---RSDIF-DAMFPVTHIAGET---VIQQGDEGDN---FYVIDQGEVDVYV  
----N-----G-----EWV-T---S-IGEG-GSFGELALIYGTTPRAATVKAKT---  
-----D-LKLWGIDRDSYRRI-L-----  
>PKA1\_[Anas\_platyrhynchos]\_514748288  
--AHLDDNE---RSDIF-DAMFPVTHIAGET---VIQQGDEGDN---FYVIDQGEVDVYV  
----N-----G-----EWV-T---S-IGEG-GSFGELALIYGTTPRAATVKAKT---  
-----D-LKLWGIDRDSYRRI-L-----  
>PKA1\_[Anolis\_carolinensis]\_327283663  
--AHLDDNE---RSDIF-DAMFPVTHIAGEI---VIQQGDEGDN---FYVIDQGEVDVYV  
----N-----G-----EWV-T---S-IGEG-GSFGELALIYGTTPRAATVKAKT---  
-----D-LKLWGIDRDSYRRI-L-----  
>PKA1\_[Aotus\_nancymaae]\_817273831  
--AHLDDNE---RSDIF-DAMFPVTHIAGET---VIQQGNEGDN---FYVIDQGEVDVYV  
----N-----G-----EWV-T---N-ISEG-GSFGELALIYGTTPRAATVKAKT---  
-----D-LKLWGIDRDSYRRI-L-----  
>PKA1\_[Apis\_cerana]\_1035586152  
-----GEA---IIRQGDEGDN---FYVIDQGEVEIFV  
----N-----G-----ELA-T---T-IGEG-GSFGELALIYGTTPRAATVRAKT---  
-----D-VKLWGIDRDSYRRI-L-----  
>PKA1\_[Apis\_florea]\_820837013  
-----GEA---IIRQGDEGDN---FYVIDQGEVEIFV  
----N-----G-----ELA-T---T-IGEG-GSFGELALIYGTTPRAATVRAKT---  
-----D-VKLWGIDRDSYRRI-L-----  
>PKA1\_[Apis\_mellifera]\_571549118  
-----PGEA---IIRQGDEGDN---FYVIDQGEVEIFV  
----N-----G-----ELA-T---T-IGEG-GSFGELALIYGTTPRAATVRAKT---  
-----D-VKLWGIDRDSYRRI-L-----  
>PKA1\_[Apteryx\_australis\_mantelli]\_926514690  
-FAHLDDNE---RSDIF-DAMFPVTHIAGET---VIQQGDEGDN---FYVIDQGEVDVYV  
----N-----G-----EWV-T---S-IGEG-GSFGELALIYGTTPRAATVKAKT---  
-----D-LKLWGIDRDSYRRI-L-----  
>PKA1\_[Astyanax\_mexicanus]\_597743064  
-----AGEI---VIQQGDEGDN---FYVIDQGEVDVYV  
----N-----N-----EWA-T---S-IGEG-GSFGELALIYGTTPRAATVRAKT---  
-----N-AKLWGIDRDSYRRI-LMGSTLRKRKMYE-----  
>PKA1\_[Athalia\_rosae]\_817088793  
-----PGEF---IIRQGDEGDN---FYVIDQGEVEIFV  
----N-----S-----ELV-T---T-IGEG-GSFGELALIYGTTPRAATVRAKT---  
-----D-VKLWGIDRDSYRRI-L-----  
>PKA1\_[Balaenoptera\_acutorostrata\_scammoni]\_594652405  
--AHLDDNE---RSDIF-DAMFPMHIAGET---VIQQGDEGDN---FYVIDQGEVDVYV

-----N-----G-----EWV-T---S-ISEG-GSFGELALIYGTTPRAATVKAKT---  
-----D-LKLWGIDRDSYRRI-LMGSTLRKRMYEE-----  
>PKA1\_[Balearica\_regulorum\_gibbericeps]\_723541872  
-----THIAGET---VIQQGDEGDN---FYVIDQGEVDVYV  
-----N-----G-----EWV-T---S-IGEG-GSFGELALIYGTTPRAATVKAKT---  
-----D-LKLWGIDRDSYRRI-LMGSTLRKRMYEEFL-----  
>PKA1\_[Bison\_bison\_bison]\_742197730  
--SHLDDNE---RSDIF-DAMFPVTHIAGET---VIQQGDEGDN---FYVIDQGEVDVYV  
-----N-----G-----EWV-T---S-ISEG-GSFGELALIYGTTPRAATVKAKT---  
-----D-LKLWGIDRDSYRRI-LMGSTLRKRMYEE-----  
>PKA1\_[Bombus\_terrestris]\_808127992  
-----GEA---IIRQGDEGDN---FYVIDQGEVEIFV  
-----N-----G-----ELA-T---T-IGEG-GSFGELALIYGTTPRAATVRAKT---  
-----D-VKLWGIDRDSYRRI-L-----  
>PKA1\_[Bos\_mutus]\_555997402  
-FSLDDNE---RSDIF-DAMFPVTHIAGET---VIQQGDEGDN---FYVIDQGEVDVYV  
-----N-----G-----EWV-T---S-ISEG-GSFGELALIYGTTPRAATVKAKT---  
-----D-LKLWGIDRDSYRRI-L-----  
>PKA1\_[Bos\_taurus]\_296472916  
-FSLDDNE---RSDIF-DAMFPVTHIAGET---VIQQGDEGDN---FYVIDQGEVDVYV  
-----N-----G-----EWV-T---S-ISEG-GSFGELALIYGTTPRAATVKAKT---  
-----D-LKLWGIDRDSYRRI-L-----  
>PKA1\_[Calidris\_pugnax]\_960983349  
--AHLDDNE---RSDIF-DAMFPVTHIAGET---VIQQGDEGDN---FYVIDQGEVDVYV  
-----N-----G-----EWV-T---S-IGEG-GSFGELALIYGTTPRAATVKAKT---  
-----D-LKLWGIDRDSYRRI-L-----  
>PKA1\_[Callorhinchus\_milii]\_632943104  
-----AGET---VIQQGDEGDN---FYVIDQGEVDVYV  
-----N-----N-----EWV-T---S-IGEG-GSFGELALIYGTTPRAATVRAKT---  
-----N-VKLWGIDRDSYRRI-LMGSTLRKRMYE-----  
>PKA1\_[Calypste\_anna]\_663276586  
--AHLDDNE---RSDIF-DAMFPVTHIAGET---VIQQGDEGDN---FYVIDQGEVDVYV  
-----N-----G-----EWV-T---S-IGEG-GSFGELALIYGTTPRAATVKAKT---  
-----D-LKLWGIDRDSYRRI-L-----  
>PKA1\_[Camelus\_dromedarius]\_744610170  
-FAHLDDSE---RSDIF-DAMFPVTHIAGET---VIQQGDEGDN---FYVIDQGEVDVYV  
-----N-----G-----EWV-T---S-ISEG-GSFGELALIYGTTPRAATVKAKT---  
-----D-LKVGIDRDSYRRI-L-----  
>PKA1\_[Camelus\_ferus]\_946601670  
-FAHLDDSE---RSDIF-DAMFPVTHIAGET---VIQQGDEGDN---FYVIDQGEVDVYV  
-----N-----G-----EWV-T---S-ISEG-GSFGELALIYGTTPRAATVKAKT---  
-----D-LKVGIDRDSYRRI-L-----  
>PKA1\_[Camponotus\_floridanus]\_752878646  
-----PGEA---IIRQGDEGDN---FYVIDQGEVEIFV  
-----N-----G-----ELA-T---T-IGEG-GSFGELALIYGTTPRAATVRAKT---  
-----D-VKLWGIDRDSYRRI-L-----  
>PKA1\_[Capra\_hircus]\_926724592  
--SHLDDNE---RSDIF-DAMFPVTHIAGET---VIQQGDEGDN---FYVIDQGEVDVYV  
-----N-----G-----EWV-T---S-ISEG-GSFGELALIYGTTPRAATVKAKT---  
-----D-LKLWGIDRDSYRRI-LMGSTLRKRMYE-----  
>PKA1\_[Carlito\_syrichta]\_640778685  
--AHLDDNE---RSDIF-DAMFPVTHIAGET---VIQQGNEGDN---FYVIDQGEVDVYV  
-----N-----G-----EWV-T---S-ISEG-GSFGELALIYGTTPRAATVKAKT---  
-----D-LKLWGIDRDSYRRI-L-----

```

>PKA1_[Cerapachys_biroi]_759046834
-----PGEA---IIRQGDEGDN---FYVIDQGEVEIFV
----N-----G-----ELA-T---T-IGEG-GSFGELALIYGTTPRAATVRAKT---
-----D-VKLWGIDRDSYRRI-L-----
>PKA1_[Ceratosolen_solmsi_marchali]_766930771
-----GEA---IIRQGDEGDN---FYVIDQGEVEIFV
----S-----G-----ELV-T---T-IGEG-GSFGELALIYGTTPRAATVRAKT---
-----D-VKLWGIDRDSYRRI-LMGSTIRKRMYYEFL-----
>PKA1_[Ceratotherium_simum_simum]_955539393
--AHLDDNE---RSDIF-DAMFPVTHIAGET---VIQQGDEGDN---FYVIDQGEVDVYV
----N-----G-----EWV-T---S-ISEG-GSFGELALIYGTTPRAATVKAKT---
-----D-LKLWGIDRDSYRRI-L-----
>PKA1_[Chaetura_pelagica]_701423906
--AHLDDNE---RSDIF-DAMFPVTHIAGET---VIQQGDEGDN---FYVIDQGEVDVYV
----N-----G-----EWV-T---S-IGEG-GSFGELALIYGTTPRAATVKAKT---
-----D-LKLWGIDRDSYRRI-L-----
>PKA1_[Charadrius_vociferus]_699626517
--AHLDDNE---RSDIF-DAMFPVTHIAGET---VIQQGDEGDN---FYVIDQGEVDVYV
----N-----G-----EWV-T---S-IGEG-GSFGELALIYGTTPRAATVKAKT---
-----D-LKLWGIDRDSYRRI-L-----
>PKA1_[Chelonia_mydas]_591381780
--AHLDDNE---RSDIF-DAMFPVMHIAGET---VIQQGDEGDN---FYVIDQGEVDVYV
----N-----G-----EWV-T---S-IGEG-GSFGELALIYGTTPRAATVKAKT---
-----D-LKLWGIDRDSYRRI-L-----
>PKA1_[Chlamydotis_macqueenii]_705673756
--AHLDDNE---RSDIF-DAMFPVTHIAGET---VIQQGDEGDN---FYVIDQGEVDVYV
----N-----G-----EWV-T---S-IGEG-GSFGELALIYGTTPRAATVKAKT---
-----D-LKLWGIDRDSYRRI-L-----
>PKA1_[Clupea_harengus]_831283318
-----AGEI---VIQQGDEGDN---FYVIDQGEVDVYV
----N-----G-----EWA-T---N-IGEG-GSFGELALIYGTTPRAATVRART---
-----N-VKLWGIDRDSYRRI-L-----
>PKA1_[Colius_striatus]_706102549
--AHLDDNE---RSDIF-DAMFPVTHIAGET---VIQQGDEGDN---FYVIDQGEVDVYV
----N-----G-----EWV-T---S-IGEG-GSFGELALIYGTTPRAATVKAKT---
-----D-LKLWGIDRDSYRRI-L-----
>PKA1_[Condylura_cristata]_830089745
--AHLDDNE---RSDIF-DAMFPVTHIAGET---VIQQGDEGDN---FYVIDQGEVDVYV
----N-----G-----EWV-T---S-ISEG-GSFGELALIYGTTPRAATVKAKT---
-----D-LKLWGIDRDSYRRI-L-----
>PKA1_[Copidosoma_floridanum]_936601194
-----GEA---IIRQGDEGDN---FYVIDQGEVEIFV
----N-----G-----ELV-T---T-IGEG-GSFGELALIYGTTPRAATVRAKT---
-----D-VKLWGIDRDSYRRI-LMNSTIRKRMYYEFL-----
>PKA1_[Coturnix_japonica]_1003958536
--AHLDDNE---RSDIF-DAMFPVTHIAGET---VIQQGDEGDN---FYVIDQGEVDVYV
----N-----G-----EWV-T---S-IGEG-GSFGELALIYGTTPRAATVKAKT---
-----D-LKLWGIDRDSYRRI-L-----
>PKA1_[Cricetulus_griseus]_625241285
-----AGET---VIQQGNEGDN---FYVVDQGEVDVYV
----N-----G-----DWV-T---T-ISEG-GSFGELALIYGTTPRAATVQAKT---
-----D-LKLWGIDRDSYRRI-L-----
>PKA1_[Cuculus_canorus]_697001501
--AHLDDNE---RSDIF-DAMFPVTHIAGET---VIQQGDEGDN---FYVIDQGEVDVYV

```

-----N-----G-----EWV-T---S-IGEG-GSFGELALIYGTTPRAATVKAKT---  
-----D-LKLWGIDRDSYRRI-L-----  
>PKA1\_[Danio\_rerio]\_115495407  
--AHLDDNE---RSDIF-DAMFPVTHIAGET---VIQQGDEGDN---FYVIDQGEVDVYV  
-----N-----G-----EWV-T---S-IGEG-GSFGELALIYGTTPRAATVKAKT---  
-----D-LKLWGIDRDSYRRI-L-----  
>PKA1\_[Daphnia\_magna]\_1022768684  
-----MFPVSAHSGEV---IIQQGDEGDN---FYVIDQGEVEVFV  
-----D-----G-----NMV-T---V-IGEG-GSFGELALIYGTTPRAATVKAKT---  
-----D-VKLWGLDRDSYRRI-L-----  
>PKA1\_[Diaphorina\_citri]\_1041547186  
-----IVRQQPGDD---FYIIVEGTALVLQ  
--NTVEE-----ESP-----VEV-G---K-LGPS-DYFGEIALLDRPRAATVVAK-----  
---G-P-LKCVKLDRARFERV-L-----  
>PKA1\_[Dipodomys\_ordii]\_852770109  
--AHLDDNE---RSDIF-DAMFPVTHIAGET---VIQQGNEGDN---FYVIDQGEADVYV  
-----N-----G-----EWV-T---N-ISEG-GSFGELALIYGTTPRAATVKAKT---  
-----D-LKLWGIDRDSYRRI-L-----  
>PKA1\_[Drosophila\_eugracilis]\_1037046479  
--AHLDESE---RSDIF-DAMFPVNHIAGEN---IIQQGDEGDN---FYVIDVGEVDVVFV  
-----N-----S-----ELV-T---T-ISEG-GSFGELALIYGTTPRAATVRAKT---  
-----D-VKLWGIDRDSYRRI-L-----  
>PKA1\_[Drosophila\_kikkawai]\_1037045534  
--AHLDESE---RSDIF-DAMFPVNHIAGED---IIRQGDEGDN---FYVIDVGEVDVVFV  
-----N-----A-----ELV-T---T-ISEG-GSFGELALIYGTTPRAATVRAKT---  
-----D-VKLWGIDRDSYRRI-L-----  
>PKA1\_[Drosophila\_suzukii]\_1036061260  
--AHLDESE---RSDIF-DAMFPVNHIAGEN---IIQQGDEGDN---FYVIDVGEVDVVFV  
-----N-----S-----ELV-T---T-ISEG-GSFGELALIYGTTPRAATVRAKT---  
-----D-VKLWGIDRDSYRRI-L-----  
>PKA1\_[Echinococcus\_multilocularis]\_961439633  
-----MFPLHRSRGDI---IIKQGDDGDN---FYIIDQGKVDIYV  
-----N-----G-----EFV-S---C-IGEG-GSFGELALIYGTTPRAATVKAHS---  
-----DEVKLWGIDRDSYRRI-LMGSTIRRRKMYQDFL-----  
>PKA1\_[Echinops\_telfairi]\_507657555  
--AHLDDNE---RSDIF-DAMFPVTHIAGET---VIQQGDEGDN---FYVVDQGEVDVYV  
-----N-----G-----EWV-T---S-ISEG-GSFGELALIYGTTPRAATVKAKT---  
-----D-LKLWGIDRDSYRRI-L-----  
>PKA1\_[Eptesicus\_fuscus]\_641728295  
--AHLDDNE---RSDIF-DAMFPVTHIAGET---VIQQGDEGDN---FYVIDQGEVDVYV  
-----N-----G-----EWV-T---N-ISEG-GSFGELALIYGTTPRAATVRAKT---  
-----D-LKLWGIDRDSYRRI-L-----  
>PKA1\_[Equus\_asinus]\_958716155  
--AHLDDNE---RSDIF-DAMFPVTHIAGET---VIQQGDEGDN---FYVIDQGEVDVYV  
-----N-----G-----EWV-T---S-ISEG-GSFGELALIYGTTPRAATVKAKT---  
-----D-LKLWGIDRDSYRRI-L-----  
>PKA1\_[Equus\_caballus]\_953870329  
-FAHLDDNE---RSDIF-DAMFPVTHIAGET---VIQQGDEGDN---FYVMDQGEVDVYV  
-----N-----G-----EWV-T---S-ISEG-GSFGELALIYGTTPRAATVKAKT---  
-----D-LKLWGIDRDSYRRI-L-----  
>PKA1\_[Esox\_lucius]\_742179557  
--AHLDDNE---RSDIF-DAMFPVTHIAGET---VIQQGDEGDN---FYVIDQGEVDVYV  
-----N-----G-----EWV-T---S-IGEG-GSFGELALIYGTTPRAATVKAKT---  
-----D-MKLWGIDRDSYRRI-L-----

>PKA1\_[Eurypyga\_helias]\_704267282  
-----THIAGET---VIQQGDEGDN---FYVIDQGEVDVYV  
----N-----G-----EWV-T---S-IGEG-GSFGELALIYGT  
PRAATVKAKT---  
-----D-LKLWGIDRDSYRRI-LMGSTLRKRKMYEEFL-----  
>PKA1\_[Falco\_cherrug]\_541967630  
--AHLDDNE---RSDIF-DAMFPVTHIAGET---VIQQGDEGDN---FYVIDQGEVDVYV  
----N-----G-----EWV-T---S-IGEG-GSFGELALIYGT  
PRAATVKAKT---  
-----D-LKLWGIDRDSYRRI-L-----  
>PKA1\_[Felis\_catus]\_755801765  
--AHLDDNE---RSDIF-DAMFPVTHIAGET---VIQQGDEGDN---FYVIDQGEVDVYV  
----N-----G-----EWV-T---S-ISEG-GSFGELALIYGT  
PRAATVKAKT---  
-----D-LKLWGIDRDSYRRI-L-----  
>PKA1\_[Fopius\_arisanus]\_755956134  
-----PGEF---IIRQGDEGDN---FYVIDQGEVEIFV  
----N-----G-----ELV-T---T-IGEG-GSFGELALIYGT  
PRAATVRAKT---  
-----D-VKLWGIDRDSYRRI-L-----  
>PKA1\_[Fukomys\_damarensis]\_676285698  
-----AGET---VIQQGNEGDN---FYVIDQGEVDVYV  
----N-----G-----EWV-T---S-ISEG-GSFGELALIYGT  
PRAATVKAKT---  
-----D-LKLWGIDRDSYRRI-L-----  
>PKA1\_[Gallus\_gallus]\_50755469  
--AHLDDNE---RSDIF-DAMFPVTHIAGET---VIQQGDEGDN---FYVIDQGEVDVYV  
----N-----G-----EWV-T---S-IGEG-GSFGELALIYGT  
PRAATVKAKT---  
-----D-LKLWGIDRDSYRRI-L-----  
>PKA1\_[Gekko\_japonicus]\_975135243  
--AHLDDNE---RSDIF-DAMFPVTHIAGET---VIQQGDEGDN---FYVIDQGEVDVYV  
----N-----G-----DLV-T---N-ISEG-GSFGELALIYGT  
PRAATVKAKT---  
-----D-LKLWGIDRDSYRRI-L-----  
>PKA1\_[Habropoda\_laboriosa]\_915658220  
-----GEA---IIRQGDEGDN---FYVIDQGEVEIFV  
----N-----G-----ELA-T---T-IGEG-GSFGELALIYGT  
PRAATVRAKT---  
-----D-VKLWGIDRDSYRRI-LMGSTLRKRKMYEEFL-----  
>PKA1\_[Haliaeetus\_albicilla]\_700352967  
-----THIAGET---VIQQGDEGDN---FYVIDQGEVDVYV  
----N-----G-----EWV-T---S-IGEG-GSFGELALIYGT  
PRAATVKAKT---  
-----D-LKLWGIDRDSYRRI-L-----  
>PKA1\_[Halyomorpha\_halys]\_939649870  
-----MFPVNFLPGET---IIQQGDEGDN---FYVIDQGEVEVYV  
----N-----S-----ELV-T---T-IGEG-SSFGELALIYGT  
PRAATVKAKT---  
-----A-VKLWGIDRDSYRRI-L-----  
>PKA1\_[Heterocephalus\_glaber]\_512956089  
--AHLDDNE---RSDIF-DAMFPVTHIAGET---VIQQGNEGDN---FYVIDQGEVDVYV  
----N-----G-----EWV-T---S-ISEG-GSFGELALIYGT  
PRAATVKAKT---  
-----D-LKLWGIDRDSYRRI-L-----  
>PKA1\_[Homo\_sapiens]\_1034656282  
-----THIAGET---VIQQGNEGDN---FYVVDQGEVDVYV  
----N-----G-----EWV-T---N-ISEG-GSFGELALIYGT  
PRAATVKAKT---  
-----D-LKLWGIDRDSYRRI-LMGSTLRKRKMYEEFL-----  
>PKA1\_[Ictidomys\_tridecemlineatus]\_532110346  
--AHLDDNE---RSDIF-DAMFPVTHIAGET---VIQQGNEGDN---FYVIDQGEVDVYV  
----N-----G-----EWV-T---N-ISEG-GSFGELALIYGT  
PRAATVKAKT---  
-----D-LKLWGIDRDSYRRI-L-----  
>PKA1\_[Intoshia\_linei]\_1026916177  
-----MFLSNFSTDDV---IMNQGDEGDN---FYVINTGTVDIIV

-----N-----N-----VKV-T---T-ITDG-SSFGEALALIYGTTPRAATVIAKSD--  
-----I-T-LFGIDRMSYRKI-L-----  
>PKA1\_[Ixodes\_scapularis]\_241117494  
--SHLDDNE---RSDIF-DAMFPVVRHAGEV---IIQQGDEGDN---FYVLDQGEVDVYV  
-----N-----G-----QLV-T---T-IAES-GSFGELALIYGTTPRAATVKAKT---  
-----D-VKLWAIDRDTYRRI-LMGSTIRKRKLYE-----  
>PKA1\_[Jaculus\_jaculus]\_847034118  
--AHLDDNE---RSDIF-DAMFPVTHIAGET---VIQQGNEGDN---FYVLDQGEVDVYV  
-----N-----G-----EWV-T---S-ISEG-GSFGELALIYGTTPRAATVKAKT---  
-----D-LKLWGIDRDSYRRI-L-----  
>PKA1\_[Lepeophtheirus\_salmonis]\_290462751  
-FSHLDDNE---RSDIF-DAMFPINALPGEV---VIKQGDEGDN---FYIIDAGEVEIYV  
-----H-----N-----EKV-L---T-IREG-GSFGELALIYGTTPRAATVKAHS---  
-----N-VKLWGIDRDSYRRI-LMGSTIRKRKMYEEFL-----  
>PKA1\_[Limulus\_polyphemus]\_926651500  
-----HSAGEK---VIQQGDEGDN---FYVIDQGEVEVVFV  
-----N-----D-----HLV-T---T-IGEG-GSFGELALIYGTTPRAATVIAKT---  
-----D-VKLWAIDRDTYRRI-L-----  
>PKA1\_[Linepithema\_humile]\_815765982  
-----PGEA---IIRQGDEGDN---FYVIDQGEVEIFV  
-----N-----G-----ELA-T---T-IGEG-GSFGELALIYGTTPRAATVRAKT---  
-----D-VKLWGIDRDSYRRI-L-----  
>PKA1\_[Lipotes\_vexillifer]\_602713819  
--AHLDDNE---RSDIF-DAMFPVMHIAGET---VIQQGDEGDN---FYVIDQGEVDVYV  
-----N-----G-----EWV-T---S-ISEG-GSFGELALIYGTTPRAATVKAKT---  
-----D-LKLWGIDRDSYRRI-LMGSTLRKRMYEEFLGKV----  
>PKA1\_[Loxodonta\_africana]\_731500532  
--AHLDDNE---RSDIF-DAMFPVTHIAGEI---VIQQGDEGDN---FYVIDQGEVDVYV  
-----N-----G-----EWV-T---S-ISEG-GSFGELALIYGTTPRAATVKAKT---  
-----D-LKLWGIDRDSYRRI-L-----  
>PKA1\_[Lucilia\_cuprina]\_906473136  
-----GEN---IIQQGDEGDN---FYVIDQGEVEVVFV  
-----N-----S-----EMV-T---T-IGEG-GSFGELALIYGTTPRAATVRAKT---  
-----D-VKLWGIDRDSYRRI-L-----  
>PKA1\_[Macaca\_mulatta]\_967510169  
-----AGET---VIQQGNEGDN---FYVIDQGEVDVYV  
-----N-----G-----EWV-T---N-ISEG-GSFGELALIYGTTPRAATVRAKT---  
-----D-LKLWGIDRDSYRRI-L-----  
>PKA1\_[Manacus\_vitellinus]\_675425077  
--AHLDDNE---RSDIF-DAMFPVTHIAGET---VIQQGDEGDN---FYVIDQGEVDVYV  
-----N-----G-----EWV-T---S-IGEG-GSFGELALIYGTTPRAATVKAKT---  
-----D-LKLWGIDRDSYRRI-L-----  
>PKA1\_[Maylandia\_zebra]\_499017241  
--AHLDDNE---RSDIF-DAMFPVTHIAGET---VIQQGDEGDN---FYVIDQGEVDVYV  
-----N-----G-----EWV-T---S-IGEG-GSFGELALIYGTTPRAATVKAKT---  
-----D-LKLWGIDRDSYRRI-L-----  
>PKA1\_[Megachile\_rotundata]\_805821312  
-----PGEA---IIRQGDEGDN---FYVIDQGEVEIFV  
-----N-----G-----ELV-T---T-IGEG-GSFGELALIYGTTPRAATVRAKT---  
-----D-VKLWGIDRDSYRRI-L-----  
>PKA1\_[Melipona\_quadrifasciata]\_925673659  
-----GEA---IIRQGDEGDN---FYVIDQGEVEIFV  
-----N-----G-----ELA-T---T-IGEG-GSFGELALIYGTTPRAATVRAKT---  
-----D-VKLWGIDRDSYRRI-LMGSTIRKRKMYEEFL-----



>PKA1\_[Merops\_nubicus]\_677431645  
--AHLDDNE---RSDIF-DAMFPVTHIAGET---VIQQGDEGDN---FYVIDQGEVDVYV  
----N-----G-----EWV-T---S-IGEG-GSFGELALIYGTTPRAATVKAKT---  
-----D-LKLWGIDRDSYRRI-L-----  
>PKA1\_[Microplitis\_demolitor]\_939681039  
-----PGEF---IIRQGDEGDN---FYVIDQGEVEIFV  
----N-----G-----ELV-T---T-IGEG-GSFGELALIYGTTPRAATVRAKT---  
-----D-VKLWGIDRDSYRRI-L-----  
>PKA1\_[Microtus\_ochrogaster]\_532048746  
-----AGET---VIQQGNEGDN---FYVIDQGEVDVYV  
----N-----G-----EWV-T---N-ISEG-GSFGELALIYGTTPRAATVKAKT---  
-----D-LKLWGIDRDSYRRI-L-----  
>PKA1\_[Monodelphis\_domestica]\_1023021855  
--AHLDDNE---RSDIF-DAMFPVTHIAGET---VILQGDEGDN---FYVIDQGEVDVYV  
----N-----M-----EWV-T---N-IGEG-GSFGELALIYGTTPRAATVKAKT---  
-----D-LKLWGIDRDSYRRI-L-----  
>PKA1\_[Mus\_musculus]\_254675178  
--SHLDDNE---RSDIF-DAMFPVTHIGGET---VIQQGNEGDN---FYVIDQGEVDVYV  
----N-----G-----EWV-T---N-ISEG-GSFGELALIYGTTPRAATVKAKT---  
-----D-LKLWGIDRDSYRRI-L-----  
>PKA1\_[Mustela\_putorius\_furo]\_511914083  
--AHLDDNE---RSDIF-DAMFPVTHIAGET---VIQQGDEGDN---FYVIDQGEVDVYV  
----N-----G-----EWV-T---S-ISEG-GSFGELALIYGTTPRAATVKAKT---  
-----D-LKLWGIDRDSYRRI-L-----  
>PKA1\_[Myotis\_brandtii]\_946750609  
--AHLDDNE---RSDIF-DAMFPVTHIAGET---VIQQGDEGDN---FYVVDQGEVDVYV  
----N-----G-----EWV-T---N-ISEG-GSFGELALIYGTTPRAATVKAKT---  
-----D-LKLWGIDRDSYRRI-L-----  
>PKA1\_[Myotis\_davidii]\_432100476  
--AHLDDNE---RSDIF-DAMFPVTHIAGET---VIQQGDEGDN---FYVVDQGEVDVYV  
----N-----G-----EWV-T---N-ISEG-GSFGELALIYGTTPRAATVKAKT---  
-----D-LKLWGIDRDSYRRI-L-----  
>PKA1\_[Myotis\_lucifugus]\_940782762  
-----AGET---VIQQGDEGDN---FYVVDQGEVDVYV  
----N-----G-----EWV-T---N-ISEG-GSFGELALIYGTTPRAATVKAKT---  
-----D-LKLWGIDRDSYRRI-L-----  
>PKA1\_[Nannospalax\_galili]\_674083910  
-----AGET---VIQQGNEGDN---FYVIDQGEVDVYV  
----N-----G-----EWV-T---N-ISEG-GSFGELALIYGTTPRAATVKAKT---  
-----D-LKLWGIDRDSYRRI-L-----  
>PKA1\_[Nasonia\_vitripennis]\_1032738335  
-----GEA---IIRQGDEGDN---FYVIDQGEVEIFV  
----N-----G-----EHV-T---T-IGEG-GSFGELALIYGTTPRAATVRAKT---  
-----D-VKLWGIDRDSYRRI-L-----  
>PKA1\_[Nestor\_notabilis]\_701290125  
-----THIAGET---VIQQGDEGDN---FYVIDQGEVDVYV  
----N-----G-----EWV-T---S-IGEG-GSFGELALIYGTTPRAATVKAKT---  
-----D-LKLWGIDRDSYRRI-L-----  
>PKA1\_[Ochotona\_princeps]\_504178228  
-----AGET---VIQQGNEGDN---FYVIDQGEVDVYV  
----N-----G-----EWV-T---N-ISEG-GSFGELALIYGTTPRAATVRAKT---  
-----D-LKLWGIDRDSYRRI-L-----  
>PKA1\_[Octodon\_degus]\_507638327  
--AHLDDNE---RSDIF-DAMFPVTHIAGET---VIQQGNEGDN---FYVIDQGEVDVYV

```

-----N-----G-----EWV-T---N-ISEG-GSFGELALIYGTTPRAATVKAKT---
-----D-LKLWGIDRDSYRRI-L-----
>PKA1_[Odobenus_rosmarus_divergens]_823433139
--AHLDDNE---RSDIF-DAMFPVTHIAGET---VIQQGDEGDN---FYVIDQGEVDVYV
-----N-----G-----EWV-T---S-ISEG-GSFGELALIYGTTPRAATVKAKT---
-----D-LKLWGIDRDSYRRI-L-----
>PKA1_[Oikopleura_dioica]_188593370
-----GTV---IIKQGDSGNF---FYVIDQGEVEVLV
-----N-----D-----KQV-A---L-ISEW-GTFGELALIHGRPRQATVVAKTD--
-----V-VKLWAIDRETYRKI-LMSLQ-----
>PKA1_[Orcinus_orca]_821392390
-----GEK---IVVQGEPEGDD---FFIITEGTASVLQ
--RRSPG-----EEY-----VEV-G---R-LGPS-DYFGEIALLNRPRRAATVVAR----
---G-P-LKCVKLDRPRFERV-L-----
>PKA1_[Ornithorhynchus_anatinus]_620942137
-----SSGDEGDN---FYVIDQGEVDVYV
-----N-----G-----EWV-T---S-IGEG-GSFGELALIYGTTPRAATVKAKT---
-----D-LKLWGIDRDSYRRI-LMGSTLRKRKMYEE-----
>PKA1_[Orycteropus_afer_afer]_634823522
--AHLDDNE---RSDIF-DAMFPVTHIAGET---VIQQGDEGDN---FYVIDQGEVDVYV
-----N-----G-----EWV-T---G-ISEG-GSFGELALIYGTTPRAATVKAKT---
-----D-LKLWGIDRDSYRRI-L-----
>PKA1_[Oryzias_latipes]_765127750
--AHLDDNE---RSDIF-DAMFPVTHIAGET---VIQQGDEGDN---FYVIDQGEVDVYV
-----N-----G-----ELV-T---N-IGEG-GSFGELALIYGTTPRAATVKAKT---
-----D-LKLWGIDRDSYRRI-L-----
>PKA1_[Otolemur_garnettii]_395845587
-----AGET---VIQQGNEGDN---FYVIDQGEVDVYV
-----N-----G-----EWV-T---S-ISEG-GSFGELALIYGTTPRAATVKAKT---
-----D-LKLWGIDRDSYRRI-L-----
>PKA1_[Ovis_aries_musimon]_803256005
-----AGET---VIQQGDEGDN---FYVIDQGEVDVYV
-----N-----G-----EWV-T---S-ISEG-GSFGELALIYGTTPRAATVKAKT---
-----D-LKLWGIDRDSYRRI-LMGSTLRKRMYE-----
>PKA1_[Ovis_aries]_966012556
-----AGET---VIQQGDEGDN---FYVIDQGEVDVYV
-----N-----G-----EWV-T---S-ISEG-GSFGELALIYGTTPRAATVKAKT---
-----D-LKLWGIDRDSYRRI-LMGSTLRKRMYE-----
>PKA1_[Pan_paniscus]_397497932
--AHLDDNE---RSDIF-DAMFPVTHIAGET---VIQQGNEGDN---FYVIDQGEVDVYV
-----N-----G-----EWV-T---N-ISEG-GSFGELALIYGTTPRAATVKAKT---
-----D-LKLWGIDRDSYRRI-L-----
>PKA1_[Panthera_tigris_altaica]_987417036
-FAHLDDNE---RSDIF-DAMFPVTHIAGET---VIQQGDEGDN---FYVIDQGEVDVYV
-----N-----G-----EWV-T---S-ISEG-GSFGELALIYGTTPRAATVKAKT---
-----D-LKLWGIDRDSYRRI-L-----
>PKA1_[Papilio_polytes]_909581713
-FTHLDESE---RADMF-DAMFPVQCLQGET---VIRQGDEGDN---FYIIDSGEVEVLV
-----N-----G-----ELV-T---T-IGEG-GSFGELALIYGTTPRAATVRARS---
-----R-LKLWGLDRDSYRRI-L-----
>PKA1_[Papilio_xuthus]_910336798
-FTHLDESE---RADMF-DAMFPVQCLQGET---VIRQGDEGDN---FYIIDSGEVEVLV
-----N-----G-----ELV-T---T-IGEG-GSFGELALIYGTTPRAATVRARS---
-----R-LKLWGLDRDSYRRI-L-----

```

>PKA1\_[Papio\_anubis]\_685620580  
-----THIAGET---VIQQGNEGDN---FYVIDQGEVDVYV  
----N-----G-----EWV-T---N-ISEG-GSFGELALIYGT  
PRAATVRAKT---  
-----D-LKLWGIDRDSYRRI-LMGSTLRKRKMYEEFL-----  
>PKA1\_[Peromyscus\_maniculatus\_bairdii]\_589957158  
-FSLDDNE---RSDIF-DAMFPVTHIAGET---VIQQGNEGDN---FYVIDQGEVDVYV  
----N-----G-----EWV-T---N-ISEG-GSFGELALIYGT  
PRAATVKAKT---  
-----D-LKLWGIDRDSYRRI-L-----  
>PKA1\_[Physeter\_catodon]\_593751936  
-FAHLDDNE---RSDIF-DAMFPVTHIAGET---VIQQGDEGDN---FYVIDQGEVDVYV  
----N-----G-----EWV-T---S-ISEG-GSFGELALIYGT  
PRAATVKAKT---  
-----D-LKLWGIDRDSYRRI-L-----  
>PKA1\_[Picoides\_pubescens]\_678195321  
--AHLDDNE---RSDIF-DAMFPVTHIAGET---VIQQGDEGDN---FYVIDQGEVDVYV  
----N-----G-----EWV-T---S-IGEG-GSFGELALIYGT  
PRAATVKAKT---  
-----D-LKLWGIDRDSYRRI-L-----  
>PKA1\_[Podiceps\_cristatus]\_683472431  
-----THIAGET---VIQQGDEGDN---FYVIDQGEVDVYV  
----N-----G-----EWV-T---S-IGEG-GSFGELALIYGT  
PRAATVKAKT---  
-----D-LKLWGIDRDSYRRI-LMGSTLRKRKMYEEFL-----  
>PKA1\_[Poecilia\_formosa]\_617414431  
--AHLDDNE---RSDIF-DAMFPVTHIAGET---VIQQGDEGDN---FYVIDQGEVDVYV  
----N-----G-----ELV-T---N-IGEG-GSFGELALIYGT  
PRAATVKAKT---  
-----D-LKLWGIDRDSYRRI-L-----  
>PKA1\_[Polistes\_canadensis]\_954558836  
-----PGEA---IIRQGDEGDN---FYVIDQGEVEIFV  
----N-----G-----ELV-T---T-IGEG-GSFGELALIYGT  
PRAATVRAKT---  
-----D-VKLWGIDRDSYRRI-L-----  
>PKA1\_[Polistes\_dominula]\_972186183  
-----GEA---IIRQGDEGDN---FYVIDQGEVEIFV  
----N-----G-----ELV-T---T-IGEG-GSFGELALIYGT  
PRAATVRAKT---  
-----D-VKLWGIDRDSYRRI-LMGSTLRKRKMYEEFL-----  
>PKA1\_[Pongo\_abelii]\_686770134  
-----THIAGET---VIQQGNEGDN---FYVIDQGEVDVYV  
----N-----G-----EWV-T---N-ISEG-GSFGELALIYGT  
PRAATVKAKT---  
-----D-LKLWGIDRDSYRRI-L-----  
>PKA1\_[Propithecus\_coquereli]\_826278761  
-FAHLDDNE---RSDIF-DAMFPVTHIAGET---VIQQGNEGDN---FYVIDQGEVDVYV  
----N-----G-----DWV-T---S-ISEG-GSFGELALIYGT  
PRAATVKAKT---  
-----D-LKLWGIDRDSYRRI-L-----  
>PKA1\_[Protobothrops\_mucrosquamatus]\_1002594974  
--AHLDDNE---RSDIF-DAMFPVTHIAGEI---VIQQGDEGDN---FYVIDHGEVYVYV  
----N-----G-----ELV-T---S-IGEG-GSFGELALIYGT  
PRAATVKAKT---  
-----D-LKLWGIDRDSYRRI-L-----  
>PKA1\_[Pteropus\_vampyrus]\_759198126  
-----MFPVSFIAGET---VIQQGDEGDN---FYVIDQGEVDVYV  
----N-----S-----EWA-T---S-VGEG-GSFGELALIYGT  
PRAATVKAKT---  
-----N-VKLWGIDRDSYRRI-L-----  
>PKA1\_[Python\_bivittatus]\_602638945  
--AHLDDNE---RSDIF-DAMFPVTHIAGET---VIQQGDEGDN---FYVIDHGEVYVYV  
----N-----G-----ELV-T---S-IGEG-GSFGELALIYGT  
PRAATVKAKT---  
-----D-LKLWGIDRDSYRRI-L-----  
>PKA1\_[Rhinopithecus\_roxellana]\_724841325  
--AHLDDNE---RSDIF-DAMFPVTHIAGET---VIQQGNEGDN---FYVIDQGEVDVYV

-----N-----G-----EWV-T---N-ISEG-GSFGELALIYGTTPRAATVRAKT---  
-----D-LKLWGIDRDSYRRI-L-----  
>PKA1\_[Salmo\_salar]\_929094637  
-----HIAGET---VIQQGDEGDN---FYVIDQGEVDVYV  
-----N-----G-----EWV-T---S-IGEG-GSFGELALIYGTTPRAATVKAKT---  
-----D-MKLWGIDRDSYRRI-LMGSTLRKRKMYEEFL-----  
>PKA1\_[Schistosoma\_mansonii]\_350855186  
-----MFPVHRNSGDV---IIQQGDEGDN---FYIIDQGEVDIFL  
-----N-----N-----EYS-S---T-IGEG-GSFGELALIYGTTPRAATVKAKT---  
-----E-VKLWGIDRDSYRRI-L-----  
>PKA1\_[Scleropages\_formosus]\_938062607  
-FSHLDDNE---RSDIF-DAMFPVTHIAGET---VILQGDEGDN---FYVIDQGEVDVYV  
-----N-----N-----EWV-T---S-IGEG-GSFGELALIYGTTPRAATVRAKT---  
-----N-VKLWGIDRDSYRRI-L-----  
>PKA1\_[Sinocyclocheilus\_anshuiensis]\_1024949926  
--AHLDDNE---RSDIF-DAMFPVTHIAGET---VIQQGDEGDN---FYVIDQGEVDVYV  
-----N-----G-----EWV-T---S-IGEG-GSFGELALIYGTTPRAATVKAKT---  
-----D-LKLWGIDRDSYRRI-L-----  
>PKA1\_[Sinocyclocheilus\_rhinocerosus]\_1025300960  
--AHLDDNE---RSDIF-DAMFPVTHIAGET---VIQQGDEGDN---FYVIDQGEVDVYV  
-----N-----G-----EWV-T---S-IGEG-GSFGELALIYGTTPRAATVKAKT---  
-----D-LKLWGIDRDSYRRI-L-----  
>PKA1\_[Solenopsis\_invicta]\_751208003  
-----PGEA---IIRQGDEGDN---FYVIDQGEVEIFV  
-----N-----G-----ELA-T---T-IGEG-GSFGELALIYGTTPRAATVRAKT---  
-----D-VKLWGIDRDSYRRI-L-----  
>PKA1\_[Sphaeroforma\_arctica\_JP610]\_929755800  
-----KAGDK---IVTQGEDGDT---FFIIVEGEAIVTQ  
--EMEGK-----AV-----EV-A---R-LHSS-DYFGEIALLTNKPRAATVTAS----  
---G-A-LKCVKLDKERFERV-LGSCE-----  
>PKA1\_[Stegastes\_partitus]\_657555081  
--AHLDDNE---RSDIF-DAMFPVTHIAGET---VIQQGDEGDN---FYVIDQGEVDVYV  
-----N-----G-----EWV-T---S-IGEG-GSFGELALIYGTTPRAATVKAKT---  
-----D-LKLWGIDRDSYRRI-L-----  
>PKA1\_[Stomoxys\_calcitrans]\_907700118  
-----GEN---IIQQGDEGDN---FYVIDQGEVEVFV  
-----N-----S-----EMV-T---T-IGDG-GSFGELALIYGTTPRAATVRAKT---  
-----D-VKLWGIDRDSYRRI-L-----  
>PKA1\_[Strongylocentrotus\_purpuratus]\_780113006  
-----GQK---IVVQGEQGDD---FFMIIEGQAAVLQ  
--RHGND-----SEL-----IEV-G---K-LGPS-DYFGEIALLDRPRAATVVAR----  
---G-N-LKCVKLDQRFERV-L-----  
>PKA1\_[Taeniopygia\_guttata]\_224070450  
--AHLDDNE---RSDIF-DAMFPVTHIAGET---VIQQGDEGDN---FYVIDQGEVDVYV  
-----N-----G-----EWV-T---S-IGEG-GSFGELALIYGTTPRAATVKAKT---  
-----D-LKLWGIDRDSYRRI-L-----  
>PKA1\_[Theileria\_equi]\_510900715  
-----V---IIQEGDAGTS---LFMILEGKAEAYC  
--QGKLV-----K---S-YSKD-DYFGEIALIKQTPRASTV-----  
-----  
>PKA1\_[Tinamus\_guttatus]\_719789282  
--AHLDDNE---RSDIF-DAMFPVTHIAGET---VIQQGDEGDN---FYVIDQGEVDVYV  
-----N-----G-----EWV-T---S-IGEG-GSFGELALIYGTTPRAATVKAKT---  
-----D-LKLWGIDRDSYRRI-L-----

```

>PKA1_[Trichechus_manatus_latirostris]_471408822
-FAHLDDNE---RSDIF-DAMFPVTHIAGEI---VIQQGDEGDN---FYVIDQGEVDVYV
-----N-----G-----EWV-T---S-ISEG-GSFGELALIYGTTPRAATVKAKT---
-----D-LKLWGIDRDSYRRI-L-----
>PKA1_[Trichogramma_pretiosum]_936716301
-----GEA---IIRQGDEGDN---FYVIDQGEVEIFV
-----N-----G-----ELV-T---T-IGEG-GSFGELALIYGTTPRAATVRAKT---
-----D-VKLWGIDRDSYRRI-LMGSTIRKRKMYEEFL-----
>PKA1_[Tupaia_chinensis]_562823219
-----HIAGET---VIQQGDEGDN---FYVIDQGEVDVYV
-----N-----G-----EWV-T---S-ISEG-GSFGELALIYGTTPRAATVKAKT---
-----D-LKLWGIDRDSYRRI-LMGSTLRKRKMYEEFL-----
>PKA1_[Tursiops_truncatus]_470639443
-----GEK---IVVQGEPGDD---FFIITEGTASVLQ
--RRSPG-----EEY-----VEV-G---R-LGPS-DYFGEIALLNRPRRAATVVAR----
---G-P-LKCVKLDPRPFERV-L-----
>PKA1_[Ursus_maritimus]_671011360
--AHLDDNE---RSDIF-DAMFPVTHIAGET---VIQQGDEGDN---FYVIDQGEVDVYV
-----N-----G-----EWV-T---S-ISEG-GSFGELALIYGTTPRAATVKAKT---
-----D-LKLWGIDRDSYRRI-L-----
>PKA1_[Vicugna_pacos]_560976338
--AHLDDSE---RSDIF-DAMFPVTHIAGET---VIQQGDEGDN---FYVIDQGEVDVYV
-----N-----G-----EWV-T---S-ISEG-GSFGELALIYGTTPRAATVKAKT---
-----D-LKVWGIDRDSYRRI-LMGSTLRKRMYEE-----
>PKA1_[Vollenhovia_emoryi]_795049279
-----PGEA---IIRQGDEGDN---FYVIDQGEVEIFV
-----N-----G-----ELA-T---T-IGEG-GSFGELALIYGTTPRAATVRAKT---
-----D-VKLWGIDRDSYRRI-L-----
>PKA1_[Xiphophorus_maculatus]_551515663
--AHLDDNE---RSDIF-DAMFPVTHIAGEI---VIQQGDEGDN---FYVIDQGEVDVYV
-----N-----C-----ELV-T---N-IGEG-GSFGELALIYGTTPRAATVKAKT---
-----D-LKLWGIDRDSYRRI-L-----
>PKA2_[Cimex_lectularius]_939264753
-----KLQLA-DALVQKSYKMGER---ILKQGDAADG---MYFVMQGEVEISI
--INDKG-----ED-----VVL-K---V-LKSG-DYFGELALVNHQPRAASAFARK---
-----K-ADLAYLDAEAFERL-L-----
>PKA2_[Copidosoma_floridanum]_936574405
-----KEQMAGVL-DAMFEKTVKPGEF---IIRQGDDGDN---FYVIEKGQYEVYV
----KD-----ALI-H---T-YDNS-GFFGELALLYNMPRAATVKAKT---
-----P-GTLWAMDRQTFRRI-LLKSAYKKRMYE-----
>PKA2_[Danio_rerio]_47085741
-----Q---LAEVL-DSMFEVLVKPGEC---IINQGDDGDN---FYVIERGVYEIVI
--QQDGLQ-----HSV-G---R-YDHK-GSFGELALMYNTPRAATIRAL-Q--
-----E-GALWALDRATFHRL-IVKNNAKKRMYE-----
>PKA2_[Fopius_arisanus]_755982687
-----KEQMTDVL-DAMFEKHVQPGDF---IIRQGDDGDN---FYVIERGKFEVYV
----KDPT---GAP-----TLI-H---T-YDNG-GAFGELALLYNMPRAATIKALT---
-----Q-GTLWAMDRQTFRRI-I-----
>PKA2_[Hydra_vulgaris]_449662454
-----MFEKKVNKGDV---IIKQGDDGDN---FYVIEKGIFDVHV
----KKD---SAE-----KIV-A---T-LEDK-GFFGDLALLYNCPRNATIIAKS---
-----E-GVLWGLDQKTFKRI-VVKATAKKRLLFEE-----
>PKA2_[Maylandia_zebra]_498997757
-----MFESIVKPQEH---VIDQGHGDN---FYVIERGVYDIVV

```

--SGK-----CV-G---Q-YNNK-GSFGELALMYNTPRAATIVAT-Q--  
-----D-GALWGLDRATFRRL-IVKNNAKKRRMYE-----  
>PKA2\_[Neolamprologus\_brichardi]\_583976161  
-----MFEVLVKPDH---IIDQGDDGDN---FYIIEKGVYDIFV  
--QKDGVS-----ICV-G---K-YDNK-GSFGELALMYNTPRAATIVAT-Q--  
-----D-GALWGLDRATFHRL-IVKNNAKKRRMYE-----  
>PKA2\_[Takifugu\_rubripes]\_410899138  
-----MFESRVQAQEH---VIDQGDDGDN---FYVIERGVFDIVV  
--SGN-----CV-G---Q-YNNK-GSFGELALMYNTPRAATIIAT-Q--  
-----E-GALWGLDRATFRRL-IVKNNAKKRRMYE-----  
>PKA2\_[Xenopus\_tropicalis]\_847114511  
-----QEQ---MSQVL-DAMFEKLVKCGEH---VIDQGDDGDN---FYVIDRGTYDIFV  
--KSDGVV-----RCV-G---A-YDNR-GSFGELALMYNTPRAATIVAT-S--  
-----V-GSIWGLDRATFRRI-IVKNNAKKRRMYE-----  
>PKG\_[Alligator\_mississippiensis]\_950917339  
-----GDY---VIREGEEGST---FFILAKGKVRVTQ  
--STDGH-----AQP-----QLI-K---T-LQKG-DYFGEKALISDDVRSANIIADEN--  
-----D-VECLVIDRET FNQT-VGTFE-----  
>PKG\_[Alligator\_sinensis]\_944338233  
-----GDY---VIREGEEGST---FFILAKGKVRVTQ  
--SSDGH-----AQP-----QLI-K---T-LQKG-DYFGEKALISDDVRSANIIADEN--  
-----D-VECLVIDRET FNQT-VGTFE-----  
>PKG\_[Amazona\_aestiva]\_944214442  
-----EYYDKGDY---VIREGEEGNT---FFIIAKGKVIVTQ  
--STSDH-----SQP-----QLI-K---N-LHKG-DYFGEKALISDDVRSANVIAD EY--  
-----N-VECLVIDRET FNQT-VGTYE-----  
>PKG\_[Amyelois\_transitella]\_913311658  
-----LAKIS-ECLKREFFSAGTP---VVRQGD RGDK---FYIIRGGTVLVTK  
--R-EGD-----DGE-----RRI-G---T-LHRG-DYFGEQALLHEDRRLATVTAQPP--  
-----G-VECLTLDRTQFTDL-LGDLD-----  
>PKG\_[Anolis\_carolinensis]\_637302463  
-----GDY---IIREGEEGNT---FFVIAKGKVKVTQ  
--TTDGQ-----PQT-----QLI-K---T-LQKG-DYFGERALISDDVRSANIIADEN--  
-----D-VECLVVDRET FNQT-VGTFE-----  
>PKG\_[Aquila\_chrysaetos\_canadensis]\_768399953  
-----EYYDKGDY---VIREGEEGNT---FFIIAKGKVIVTQ  
--SSADH-----LQP-----QLI-K---N-LHKG-DYFGEKALIRDDVRSANVIAD EY--  
-----N-VECLVIDRET FNQI-VGTYE-----  
>PKG\_[Austrofundulus\_limnaeus]\_928051910  
-----GEY---VIRQGEEST---FYIIAQGKVNVTQ  
--TTEAH-----KMP-----QII-N---T-LQTG-DYFGEKALISDDVRSANIIAD DN--  
-----G-VECLVIDRET FDQT-V-----  
>PKG\_[Bos\_mutus]\_555982500  
-----GDY---IIREGEEGST---FFILAKGKVKVTQ  
--STEGH-----DQP-----QLI-K---T-LQKG-EYFGEKALISEDVRSANIIAEEN--  
-----D-VACLVIDRET FNQT-VGTFEELQKYLE-----  
>PKG\_[Bos\_taurus]\_296486400  
-----GDY---IIREGEEGST---FFILAKGKVKVTQ  
--STEGH-----DQP-----QLI-K---T-LQKG-EYFGEKALISEDVRSANIIAEEN--  
-----D-VACLVIDRET FNQT-VGTFEELQKYLE-----  
>PKG\_[Camelus\_bactrianus]\_743701208  
-----GDY---IIREGEEGST---FFILAKGKVKVTQ  
--STEGH-----DQP-----QLI-K---T-LQKG-EYFGEKALISEDVRSANIIAEEN--  
-----D-VACLVIDRET FNQT-VGTFEELQKYLE-----

```

>PKG_[Camelus_ferus]_560928512
-----GDY---IIREGEEGST---FFILAKGKVKVTQ
--STEGH-----DQP-----QLI-K---T-LQKG-EYFGEKALISEDVRSANIIAEEN--
-----D-VACLVIDRETFNQT-VGTFEELQKYLE-----
>PKG_[Capra_hircus]_548470773
SVSLLKNLPEDKLSKII-DCLEVEYYDKGDY---IIREGEEGST---FFILAKGKVKVTQ
--STEGH-----DQP-----QLI-K---T-LQKG-EYFGEKALISEDVRSANIIAEEN--
-----D-VACLVIDRETFNQT-VGTFEELQKYLE-----
>PKG_[Caprimulgus_carolinensis]_704316565
-----GDY---IIREGEEGNT---FFIIAKGKVIVTQ
--STADH-----SQP-----QVI-K---N-LHKG-DYFGEKALISDDVRSANVIAD EY--
-----N-VECLVIDRETFNQT-VGTYE-----
>PKG_[Carlito_syrichta]_640823046
-----GDY---IIREGEEGST---FFILAKGKVKVTQ
--STEGH-----DQP-----QLI-K---T-LQKG-EYFGEKALISDDVRSANIIAEEN--
-----D-IACLVIDRETFNQT-VGTFEELQKYLE-----
>PKG_[Cebus_capucinus_imitator]_1044360559
-----GDY---IIREGEEGST---FFILAKGKVKVTQ
--STEGH-----DQP-----QLI-K---T-LQKG-EYFGEKALISDDVRSANIIAEEN--
-----D-VACLVIDRETFNQT-VGTFEELQKYLE-----
>PKG_[Cercocebus_atys]_795495021
-----GDY---IIREGEEGST---FFILAKGKVKVTQ
--STEGH-----DQP-----QLI-K---T-LQKG-EYFGEKALISDDVRSANIIAEEN--
-----D-VACLVIDRETFNQT-VGTFEELQKYLE-----
>PKG_[Chinchilla_lanigera]_533147780
-----GDY---IIREGEEGST---FFILAKGKVKVTQ
--STEGH-----DQP-----QLI-K---T-LQKG-EYFGEKALISDDVRSANIIAEEN--
-----D-VACLVIDRETFNQT-VGTFEELQKYLE-----
>PKG_[Chlamydotis_macqueenii]_677160399
-----EYYDKGDY---VIREGEEGNT---FFIIAKGKVIVTQ
--STADH-----LQP-----QLI-K---N-LHKG-DYFGEKALISDDVRSANVIAD EY--
-----N-VECLVIDRETFNQT-VGTYE-----
>PKG_[Chrysochloris_asiatica]_586489323
-----GDY---IIREGEEGST---FYILAKGKVQVTQ
--STEGH-----DQP-----QLI-K---I-LQKG-DYFGEKALISDDVRSANIIAEEN--
-----D-VACLVIDRETFNQT-VGTFE-----
>PKG_[Chrysochromulina_sp._CCMP291]_922865428
-----IITEGEEGTH---FYVIARGEVVITK
--AGQG-----EL-A---R-RREG-DYFGELSLKTGAPTMA SVTAA----
---AAG-TTVVRMDRGAFQRL-L-----
>PKG_[Clupea_harengus]_831282541
-----GEY---VIREGEEGNT---FFIIAQGGVCVTQ
--TMEGC-----PDP-----QQI-K---T-LGVG-DYFGEKALISEDVRSANIIATDD--
-----N-TQCLVLDRDNFNQM-VGTYEELQAYLREY-----
>PKG_[Columba_livia]_915525022
-----EYYNKG DY---VIREGEEGNT---FFIIAKGKVIVTQ
--STADH-----VQP-----QVI-K---N-LHKG-DYFGEKALISDDVRSANVIAD EY--
-----N-VECLVIDRETFNQT-VGTYE-----
>PKG_[Condylura_cristata]_507942718
SVSLLKNLP E EKLTKII-DCLEVEYYDKGDY---IIREGEEGST---FFILAKGKVKVTQ
--STEGH-----DQP-----QLI-K---T-LQKG-EYFGEKALISEDVRSANIIAEEN--
-----D-VACLVIDRETFNQT-VGTFEELQKYLE-----
>PKG_[Corvus_brachyrhynchos]_669292792
-----EYYVKGDY---VIREGEEGNT---FFIIAKGRVIVTQ

```

--STADH-----SQP-----QVI-K---N-LHKG-DYFGEKALISDDVRSANVIADEY--  
-----N-VECLVIDRETFNQT-VGTYE-----  
>PKG\_[Corvus\_cornix\_cornix]\_727064776  
-----EYYVKG DY---VIREGEEGNT---FFIIAKGRVIVTQ  
--STADH-----SQP-----QVI-K---N-LHKG-DYFGEKALISDDVRSANVIADEY--  
-----N-VECLVIDRETFNQT-VGTYE-----  
>PKG\_[Coturnix\_japonica]\_1003773094  
-----EYYNKG DY---VIREGEEGNT---FFIIAKGKVKVTQ  
--STTDH-----SQP-----LLI-K---N-LHKG-DYFGEKALISDDVRSANVIADEY--  
-----D-VECLVIDRETFNQT-VGTYE-----  
>PKG\_[Cricetulus\_griseus]\_354504910  
-----GDY---IIREGEEGST---FFILAKGKVKVTQ  
--STEGH-----EQP-----QLI-K---T-LQKG-EYFGEKALISDDVRSANIIAEEN--  
-----D-VACLVIDRETFNQT-VGTFEELQKYLE-----  
>PKG\_[Cynoglossus\_semilaevis]\_657784751  
-----GEY---IIREGEEGNT---FFIIAKGEVIVTQ  
--STEGF-----IEP-----QEI-K---T-LTVG-DYFGEKALISEDVRSANIVSNQN--  
-----D-THCLVVDRDNFNQI-VGTYEELQAYLKEYVKEL-----  
>PKG\_[Danio\_rerio]\_528497262  
-----GEY---IIREGEEGNT---FFIIAKGEVSVTQ  
--TTEGF-----TEP-----QEI-K---T-LRVG-DYFGEKALISEDVRSANIIAKEN--  
-----D-TQCLVVDRDNFNEM-VGTYEELQAYLREYVEEL-----  
>PKG\_[Elephantulus\_edwardii]\_585657006  
-----GDY---IIREGEEGST---FYILAKGKVKVTQ  
--STEGH-----DQP-----QLI-K---V-LQKG-EYFGEKALISDDVRSANIIAEEN--  
-----A-VACLVIDRETFNQT-VGTFEELQKYLE-----  
>PKG\_[Equus\_caballus]\_194209030  
-----GDY---IIREGEEGST---FFILAKGKVKVTQ  
--STEGH-----DQP-----QLI-K---T-LQKG-EYFGEKALISEDVRSANIIAEEN--  
-----D-VACLVIDRETFNQT-VGTFEELQKYLE-----  
>PKG\_[Esox\_lucius]\_742098783  
-----GEY---IIREGEEGNT---FFIIAKGEVCVTQ  
--TTEGW-----TEP-----QEI-K---T-LGVG-DYFGEKALISEDVRSANIISTEN--  
-----D-TQCLVVDRDNFNQI-VGTYEELQAYLKEYVKEL-----  
>PKG\_[Felis\_catus]\_755722898  
-----GDY---IIREGEEGST---FFILAKGKVKVTQ  
--STEGH-----DQP-----QLI-K---T-LQKG-EYFGEKALISEDVRSANIIAEEN--  
-----D-VACLVIDRETFNQT-VGTFEELQKYLE-----  
>PKG\_[Fukomys\_damarensis]\_676286342  
-----GDY---IIREGEEGST---FFILAKGKVKVTQ  
--STEGH-----DQP-----QLI-K---T-LQTG-EYFGEKALISDDVRSANIIAEEN--  
-----D-VACLVIDRETFNQT-VGTFEELQKYLE-----  
>PKG\_[Gekko\_japonicus]\_975113523  
-----EYYDKG DY---VIREGEEGNT---FFVIAKGVKVTQ  
--TAEGC-----TQA-----HLI-K---I-LQKG-DYFGEKALISDDVRSANIIADEN--  
-----D-VECLVIDRETFNQT-VGTFE-----  
>PKG\_[Haplochromis\_burtoni]\_554822682  
-----GEY---VIREGEEGST---FYIIAQGVKVTQ  
--TTEAH-----KLP-----QII-N---T-LQKG-DYFGEKALISDDVRSANIIADEN--  
-----G-VECLVIDRETFDQT-V-----  
>PKG\_[Heterocephalus\_glaber]\_512971868  
-----GDY---IIREGEEGST---FFILAKGKVKVTQ  
--STEGH-----DQP-----QLI-K---T-LQTG-EYFGEKALISDDVRSANIIAEEN--  
-----D-VACLVIDRETFNQT-VGTFEELQKYLE-----



>PKG\_[Homo\_sapiens]\_1034640577  
-----GDY---IIREGEEGST---FFILAKGKVKVTQ  
--STEGH-----DQP-----QLI-K---T-LQKG-EYFGEKALISDDVRSANIIAEEN--  
-----D-VACLVIDRETFNQT-VGTFEELQKYLE-----  
>PKG\_[Jaculus\_jaculus]\_507538849  
-----GDY---IIREGEEGST---FFILAKGKVKVTQ  
--STEGH-----DQP-----QLI-K---T-LQKG-EYFGEKALISDDVRSANIIAEEN--  
-----D-VACLVIDRETFNQT-VGTFEELQKYLE-----  
>PKG\_[Kryptolebias\_marmoratus]\_1041107755  
-----GEY---IIREGEEGNT---FFIIAKGEVIVTQ  
--STEGF-----AEP-----QEI-K---T-LGVG-DYFGEKALISEDVRSANIIICSEN--  
-----D-TQCLVVDRDNFIQM-VGTYEELQVYLKEYVKEL-----  
>PKG\_[Lepisosteus\_oculatus]\_972953834  
-----EYYDKGDY---VIREGEEGST---FYIIAKGKVKVTQ  
--STQDH-----VEP-----QTI-K---T-LQKG-DYFGEKALISDDVRSANIIADEN--  
-----D-VECLVIDRETFNQT-V-----  
>PKG\_[Lipotes\_vexillifer]\_602724288  
-----GDY---IIREGEEGST---FFILAKGKVKVTQ  
--STEGH-----DQP-----QLI-K---T-LQKG-DYFGEKALISEDVRSANIIAEEN--  
-----D-VACLVIDRETFNQT-VGTFE-----  
>PKG\_[Loa\_loa]\_393910958  
-----MFPVEKKKGET---IIEQGEEGDN---FYVIDSGEVDVVFV  
----N-----G-----EYA-L---S-IKEG-GSFGELALIYGT PRAATVVAKSD--  
-----V-VKCAIDRITYRQI-L-----  
>PKG\_[Macaca\_mulatta]\_966943263  
-----GDY---IIREGEEGST---FFILAKGKVKVTQ  
--STEGH-----DQP-----QLI-K---T-LQKG-EYFGEKALISDDVRSANIIAEEN--  
-----D-VACLVIDRETFNQT-VGTFEELQKYLE-----  
>PKG\_[Macaca\_nemestrina]\_795492120  
-----GDY---IIREGEEGST---FFILAKGKVKVTQ  
--STEGH-----DQP-----QLI-K---T-LQKG-EYFGEKALISDDVRSANIIAEEN--  
-----D-VACLVIDRETFNQT-VGTFEELQKYLE-----  
>PKG\_[Manacus\_vitellinus]\_675407196  
-----EYYNKGDY---VIREGEEGNT---FFIIAKGKVIVTQ  
--STADH-----SQP-----QLI-K---N-LHKG-DYFGEKALISDDVRSANVIAD EY--  
-----N-VECLVIDRETFNQT-VGTYEELQTYLEGYVADL-----  
>PKG\_[Maylandia\_zebra]\_499004466  
-----GEY---VIREGEEGST---FYIIAQGKVKVTQ  
--TTEAH-----KLP-----QII-N---T-LQKG-DYFGEKALISDDVRSANIIADEN--  
-----G-VECLVIDRETFDQT-V-----  
>PKG\_[Monodelphis\_domestica]\_126331034  
-----GDY---IIREGEEGST---FFILAKGVVKVTQ  
--STEGY-----DQP-----QLI-K---T-LKKG-DYFGEKALISDDVRSANIIAEEN--  
-----D-VACLVIDRETFNQT-VGTFE-----  
>PKG\_[Mus\_musculus]\_568935385  
-----GDY---IIREGEEGST---FFILAKGKVKVTQ  
--STEGH-----DQP-----QLI-K---T-LQKG-EYFGEKALISDDVRSANIIAEEN--  
-----D-VACLVIDRETFNQT-V-----  
>PKG\_[Mustela\_putorius\_furo]\_511916269  
-----GDY---IIREGEEGST---FFILAKGKVKVTQ  
--STEGH-----DQP-----QLI-K---T-LQKG-EYFGEKALISEDVRSANIIAEEN--  
-----D-VACLVIDRETFNQT-VGTFEELQKYLE-----  
>PKG\_[Nannospalax\_galili]\_674054426  
-----GDY---IIREGEEGST---FFILAKGKVKVTQ

```

--STEGH-----DQP-----QLI-K---T-LQKG-EYFGEKALISDDVRSANIIAEEN--
-----D-VACLVIDRETFNQT-VGTFEELQKYLE-----
>PKG_[Nomascus_leucogenys]_33223332
-----GDY---IIREGEEGST---FFILAKGKVKVTQ
--STEGH-----DQP-----QLI-K---T-LQKG-EYFGEKALISDDVRSANIIAEEN--
-----D-VACLVIDRETFNQT-VGTFEELQKYLE-----
>PKG_[Nothobranchius_furzeri]_1007752306
-----GEY---VIRQGEEST---FYIIAQGKVKVTQ
--TTEAH-----KPP-----QII-N---T-LQKG-DYFGEKALISDDLRSANIIADEN--
-----G-VECLVIDRETFD-----
>PKG_[Notothenia_coriiceps]_736227441
-----GEY---IIREGEEGNT---FFIIAKGEVIVTQ
--STEGL-----AEP-----QEI-K---T-LGVG-DYFGEKALISEDVRSANIIICNEN--
-----D-THCLVVDRDNFNQM-VGTYEELQSYLKEY-----
>PKG_[Ochotona_princeps]_504158458
-----GDY---IIREGEEGST---FFILAKGKVKVTQ
--STEGH-----DQP-----QLI-K---T-LQKG-EYFGEKALISDDVRSANIIAEEN--
-----D-VACLVIDRETFNQT-VGTFEDLQKYLE-----
>PKG_[Octodon_degus]_507695791
-----GDY---IIREGEEGST---FFILAKGKVKVTQ
--STEGH-----DQP-----QLI-K---T-LQKG-EYFGEKALISDDVRSANIIAEEN--
-----D-VACLVIDRETFNQT-VGTFEELQKYLE-----
>PKG_[Orcinus_orca]_466060154
-----GDY---IIREGEEGST---FFILAKGKVKVTQ
--STEGH-----DQP-----QLI-K---T-LQKG-EYFGEKALISEDVRSANIIAEEN--
-----D-VACLVIDRETFNQT-VGTFEELQKYLE-----
>PKG_[Oryzias_latipes]_432901822
-----GEY---IIREGEEGNT---FFIIAKGQVTVTQ
--SSEGF-----TQP-----QEI-K---T-LGVG-DYFGERALISEDVRSANIIICNEN--
-----D-TQCLVVDRDNFNQM-VGTYEELQTYLKEY-----
>PKG_[Ostreococcus_tauri]_308800796
-----IS-NAARRETYEARDE---VFRQGDPGHC---FYIIERGEVSVRV
-----NG-----AEV-V---K-LSRG-DFFGERALVNNEPRAATIYA-MT--
-----E-VSCLVLNRQTFVSM-LGSIE-----
>PKG_[Otolemur_garnettii]_395834200
-----GDY---IIREGEEGST---FFILAKGKVKVTQ
--STEGH-----DQP-----QLI-K---T-LQKG-EYFGEKALISDDVRSANIIAEEN--
-----D-VACLVIDRETFNQT-VGTFEELQKYLE-----
>PKG_[Ovis_aries]_426231932
-----GDY---IIREGEEGST---FFILAKGKVKVTQ
--STEGH-----DQP-----QLI-K---T-LQKG-EYFGEKALISEDVRSANIIAEEN--
-----D-VACLVIDRETFNQT-VGTFEELQKYLE-----
>PKG_[Panthera_tigris_altaica]_591295261
-----GDY---IIREGEEGST---FFILAKGKVKVTQ
--STEGH-----DQP-----QLI-K---T-LQKG-EYFGEKALISEDVRSANIIAEEN--
-----D-VACLVIDRETFNQT-VGTFEELQKYLE-----
>PKG_[Papio_anubis]_685541174
-----GDY---IIREGEEGST---FFILAKGKVKVTQ
--STEGH-----DQP-----QLI-K---T-LQKG-EYFGEKALISDDVRSANIIAEEN--
-----D-VACLVIDRETFNQT-VGTFEELQKYLE-----
>PKG_[Paramecium_tetraurelia_strain_d4-2]_124088638
-----GEM---VFKQGDKASS---YFLIERGQCQIII
----NNE-----VKK---T-LKQG-EAFGELALLYNAPRSASVKAVG---
-----D-CAFWAIDRNTVRKA-IEAISQRDYEQNK-----

```

>PKG\_[Paramecium\_tetraurelia]\_74832323  
-----GQF---VFKQGDKASS---YFLIERGQCQIII  
----NGE-----LKK---T-LKSG-DAFGELAMLYNAPRSASVRAVG---  
-----D-CAFWAIDRNTFRKV-VE-----  
>PKG\_[Parus\_major]\_998687631  
-----EYYDKGDY---VIREGEEGNT---FFIIAKGKVVVTQ  
--STTDH-----SQP-----QVI-K---N-LHKG-DYFGEKALISDDVRSANVIADEY--  
-----N-VECLVIDRETfNQT-VGTYE-----  
>PKG\_[Peromyscus\_maniculatus\_bairdii]\_589925120  
-----GDY---IIREGEEGST---FFILAKGKVVVTQ  
--STEGH-----DQP-----QLI-K---T-LQKG-EYFGEKALISDDVRSANIIAEEN--  
-----D-VACLVIDRETfNQT-VGTFEELQKYLE-----  
>PKG\_[Physeter\_catodon]\_593728959  
-----GDY---IIREGEEGST---FFILAKGKVVVTQ  
--STEGH-----DQP-----QLI-K---T-LQKG-EYFGEKALISEDVRSANIIAEEN--  
-----D-VACLVIDRETfNQT-VGTFEELQKYLE-----  
>PKG\_[Poecilia\_formosa]\_617384217  
-LANLPDDKLSKIVDCL-EVEY---YDKGEY---VIRQGEEST---FYIIAQGKVVVTQ  
--TTEAY-----RLP-----QTI-N---T-LQKG-DYFGEKALISDDVRSANIIADEN--  
-----G-VECLVIDRETfDHT-VGNFNElQKHLEGYVATLDRDDK  
>PKG\_[Pongo\_abelii]\_297673859  
-----GDY---IIREGEEGST---FFILAKGKVVVTQ  
--STEGH-----DQP-----QLI-K---T-LQKG-EYFGEKALISDDVRSANIIAEEN--  
-----D-VACLVIDRETfNQT-VGTFEELQKYLE-----  
>PKG\_[Protobothrops\_mucrosquamatus]\_1002572554  
-----EYYDKGDY---VIREGEEGST---FFVISRGKVVVTQ  
--TPEGQ-----TQP-----QLI-K---T-LQKG-DSFGEKALISDDVRSANIIADEN--  
-----D-VECLVIDRETfNQT-VGTFE-----  
>PKG\_[Pseudopodoces\_humilis]\_929494223  
-----EYYDKGDY---VIREGEEGNT---FFIIAKGKVVVTQ  
--STTDH-----SQP-----QVI-K---N-LHKG-DYFGEKALISDDVRSANVIADEY--  
-----N-VECLVIDRETfNQT-VGTYE-----  
>PKG\_[Pundamilia\_nyererei]\_548356986  
-----GEY---VIREGEEGST---FYIIAQGKVVVTQ  
--TTEAH-----KLP-----QII-N---T-LQKG-DYFGEKALISDDVRSANIIADEN--  
-----G-VECLVIDRETfDQT-V-----  
>PKG\_[Rattus\_norvegicus]\_149046836  
-----GDY---IIREGEEGST---FFILAKGKVVVTQ  
--STEGH-----DQP-----QLI-K---T-LQKG-EYFGEKALISDDVRSANIIAEEN--  
-----D-VACLVIDRETfNQT-V-----  
>PKG\_[Rhinopithecus\_roxellana]\_724952715  
-----GDY---IIREGEEGST---FFILAKGKVVVTQ  
--STEGH-----DQP-----QLI-K---T-LQKG-EYFGEKALISDDVRSANIIAEEN--  
-----D-VACLVIDRETfNQT-VGTFEELQKYLE-----  
>PKG\_[Saimiri\_boliviensis\_boliviensis]\_403263339  
-----GDY---IIREGEEGST---FFILAKGKVVVTQ  
--STEGH-----DQP-----QLI-K---T-LQKG-EYFGEKALISDDVRSANIIAEEN--  
-----D-VACLVIDRETfNQT-VGTFEELQKYLE-----  
>PKG\_[Salmo\_salar]\_929265821  
-----GEY---IIREGEEGNT---FFIIAKGEVCVTQ  
--TTEGC-----TEP-----QEI-K---T-LGVG-DYFGEKALISEDVRSANIISTEN--  
-----D-TQCLVVDRDNFNQM-VGTYEELQAYLKEYVEEL-----  
>PKG\_[Sarcophilus\_harrisii]\_821490471  
-----GDY---IIREGEEGST---FFILAKGMVVVTQ

--STEGN-----DKP-----QVI-K---T-LQKG-DYFGEKALISDDVRSANIIAEEN--  
-----D-VACLVIDRETFSQT-VGTFE-----  
>PKG\_[Scleropages\_formosus]\_938085719  
-----GDY---IIREGEEGNT---FFIIAKGEVSVTQ  
--TVEGF-----PEP-----QEI-K---T-LGVG-DYFGEKALVSEDVRSANIICKEN--  
-----D-TECLVLDRDNFNQM-VGTYEELQAYLREY-----  
>PKG\_[Sinocyclocheilus\_anshuiensis]\_1025161141  
-----GEY---IIREGEEGNT---FFIIAKGEVLVTQ  
--TTEGF-----SEP-----QEI-K---T-LGVG-DYFGEKALISEDVRSANIIAKEN--  
-----D-TQCLVVDRDNFNQM-VGTYEELQAYLREY-----  
>PKG\_[Sinocyclocheilus\_grahami]\_1020420739  
-----GEY---IIREGEEGNT---FFIIAKGEVLVTQ  
--TTEGF-----SEP-----QEI-K---T-LVVG-DYFGEKALISEDVRSANIIAKEN--  
-----D-TQCLVVDRDNFNQM-VGTYEELQAYLREY-----  
>PKG\_[Sinocyclocheilus\_rhinocerosus]\_1025246920  
-----GEY---IIREGEEGNT---FFIIAKGEVLVTQ  
--TTEGF-----SEP-----QEI-K---T-LGVG-DYFGEKALISEDVRSANIIAKEN--  
-----D-TQCLVVDRDNFNQM-VGTYEELQAYLREY-----  
>PKG\_[Stegastes\_partitus]\_657591087  
-----GEY---IIREGEEGNT---FFIIAKGEVIVTQ  
--RTEGF-----AEP-----QEI-N---T-LGVG-DYFGEKALISEDVRSANIIICNEN--  
-----D-THCLVVDRENFNQM-VGTYEELQAYLKEYVEEL-----  
>PKG\_[Sturnus\_vulgaris]\_959065620  
-----EYYDKGDY---VIREGEEGNT---FFIIAKGKIVTQ  
--STTDH-----SQP-----QVI-K---N-LHKG-DYFGEKALISDDVRSANVIAD EY--  
-----N-VECLVIDRET FNQT-VGTYE-----  
>PKG\_[Sus\_scrofa]\_350588031  
-----GDY---IIREGEEGST---FFILAKGKVKVTQ  
--STEGH-----DQP-----QLI-K---T-LQKG-EYFGEKALISEDVRSANIIAEED--  
-----D-VACLVIDRET FNQT-VGTFEELQKYLE-----  
>PKG\_[Takifugu\_rubripes]\_410922467  
-----GEF---IIREGEEGST---FYIIAQGKVKVTQ  
--TTEAH-----TFP-----QVI-N---T-LQKG-DYFGEKALVSDDVRSASILAEEN--  
-----G-VECLVIDRET FDQT-V-----  
>PKG\_[Tetrahymena\_thermophila\_SB210]\_829108302  
-----VFKQEDKASS---YFIIESGQVDIII  
----NDE-----VKR---T-LNPG-ESFGELALLYNAPRSASIRCKG---  
-----N-CHFWAIDRNSFRKT-IEDMVQK-----  
>PKG\_[Theileria\_orientalis\_strain\_Shintoku]\_697892214  
-----GST---VTKQGTNGSY---FFIINEGVFDV FV  
--DDKLV-----N---T-MERG-ASFGEIALINDMPRTATVKVRD---  
-----  
>PKG\_[Vicugna\_pacos]\_560951478  
-----GDY---IIREGEEGST---FFILAKGKVKVTQ  
--STEGH-----DQP-----QLI-K---T-LQKG-EYFGEKALISEDVRSANIIAEEN--  
-----D-VACLVIDRET FNQT-VGTFEELQKYLE-----  
>PKG\_[Xenopus\_tropicalis]\_512852469  
-----GDY---IIREGEEGNT---FFIIAKGKVCVTQ  
--AVEGS-----QEP-----QEI-K---T-LGVG-DYFGEKALISEDVRSANIIAEED--  
-----D-TQCLVIDRDT FNQM-VGTYQELQTYLREY-----  
>Rapgef1\_[Ascaris\_suum]\_541042023  
ALAHLSTMV---KRELASVVFFEQHQHAGTV---LFRQGDEGNS---WYIILKGSVHVSI  
H---GKGI-----V-C---T-LQEG-DDFGKLALVNDAPRAATIALSED--  
-----N-SQFLRVDKTD FNRI-LRDVEANTVRLKEHGH DVLV---

>Rapgef1\_[Loa\_loa]\_393908590  
ALTHLSTMV---KRELAAVVFFEQHQHAGHV---LFRQGDVGIC---WYIILKGSVDVII  
H----GKGV-----V-C---T-LREG-DDFGKLALVNDAPRAATVALRQD--  
-----K-SQFLRVDKDDFNRI-LRDVEANTVRLKEHGQDVLV---  
>Rapgef1\_[Toxocara\_canis]\_734558230  
ALAHLSTMV---KRELASVVFFEQHQHAGTV---LFRQGDEGNC---WYIILKGSVNVSII  
H----GKGV-----V-C---T-LQEG-DDFGKLALVNDAPRAATIALCED--  
-----N-SQFLRVDKTDNFRI-LRDVEANTVRLKEHGHDVLV---  
>Rapgef2\_[Acanthisitta\_chloris]\_677303776  
AFANMTMSV---RRELCAVMVFAVVERAGTI---VLNDGEELDS---WSVILNGSVEVTY  
---PDGR-----T-E---I-LCMG-NSFGVSPTEMEKEYMKGVMRTKVD--  
-----D-CQFVCIAQQDYCRI-LNQVEKNMQKVEE-EGEIV-----  
>Rapgef2\_[Acromyrmex\_echinatior]\_746838636  
AFTNMTLAV---RRALCAVMVFAVVDRAGMV---VLNDGEELDS---WSVLINGAVEIEH  
---SNGE-----I-E---Q-LGLG-DSFGILPTMERLLHRGVMRTKCD--  
-----D-CQFVCVTQADYFRI-QHQGEENTRRHE-ENGRVI-----  
>Rapgef2\_[Alligator\_mississippiensis]\_950917983  
AFANMTMSV---RRELCAVMVFAVVERAGTI---VLNDGEELDS---WSVILNGSVEVTY  
---PDGR-----T-E---I-LCMG-NSFGVSPTLDEKEYMKGVMRTKVD--  
-----D-CQFVCIAQQDYCRI-LNQVEKNMQKVEE-EGEIV-----  
>Rapgef2\_[Alligator\_sinensis]\_557280478  
AFANMTMSV---RRELCAVMVFAVVERAGTI---VLNDGEELDS---WSVILNGSVEVTY  
---PDGR-----M-E---I-LCMG-NSFGVSPTLDEKEYMKGVMRTKVD--  
-----D-CQFVCIAQQDYCRI-LNQVEKNMQKVEE-EGEIV-----  
>Rapgef2\_[Anser\_cygnoides\_domesticus]\_902881430  
AFANMTMSV---RRELCAVMVFAVVERAGTI---VLNDGEELDS---WSVILNGSVEVTY  
---PDGR-----T-E---I-LCMG-NSFGVSPTEMDKEYMKGVMRTKVD--  
-----D-CQFVCIAQQDYCRI-LNQVEKNMQKVEE-EGEIV-----  
>Rapgef2\_[Apis\_cerana]\_1035602537  
AFTNMTLAV---RRALCAVMVFAVVERAGMI---VLNDGEELDS---WSVLINGAVEIEH  
---SNGE-----I-E---Q-LHLG-DSFGILPTMERLLHRGVMRTKCD--  
-----D-CQFVCVTQADYFRI-QHQGEENTRRHE-ENGRVI-----  
>Rapgef2\_[Apis\_florea]\_820851409  
AFTNMTLAV---RRALCAVMVFAVVERAGMI---VLNDGEELDS---WSVLINGAVEIEH  
---SNGE-----I-E---Q-LHLG-DSFGILPTMERLLHRGVMRTKCD--  
-----D-CQFVCVTQADYFRI-QHQGEENTRRHE-ENGRVI-----  
>Rapgef2\_[Apis\_mellifera]\_1032018827  
AFTNMTLAV---RRALCAVMVFAVVERAGMI---VLNDGEELDS---WSVLINGAVEIEH  
---SNGE-----I-E---Q-LHLG-DSFGILPTMERLLHRGVMRTKCD--  
-----D-CQFVCVTQADYFRI-QHQGEENTRRHE-ENGRVI-----  
>Rapgef2\_[Aptenodytes\_forsteri]\_675315011  
AFANMTMSV---RRELCAVMVFAVVERAGTI---VLNDGEELDS---WSVILNGSVEVTY  
---PDGR-----T-E---I-LCMG-NSFGVSPTEMEKEYMKGVMRTKVD--  
-----D-CQFVCIAQQDYCRI-LNQVEKNMQKVEE-EGEIV-----  
>Rapgef2\_[Apteryx\_australis\_mantelli]\_926516120  
AFANMTMSV---RRELCAVMVFAVVERAGTI---VLNDGEELDS---WSVILNGSVEVTY  
---PDGR-----T-E---I-LCMG-NSFGVSPTEMEKEYMKGVMRTKVD--  
-----D-CQFVCIAQQDYCRI-LNQVEKNMQKVEE-EGEIV-----  
>Rapgef2\_[Aquila\_chrysaetos\_canadensis]\_768351324  
AFANMTMSV---RRELCAVMVFAVVERAGTI---VLNDGEELDS---WSVILNGSVEVTY  
---PDGR-----T-E---I-LCMG-NSFGVSPTEMEKEYMKGVMRTKVD--  
-----D-CQFVCIAQQDYCRI-LNQVEKNMQKVEE-EGEIV-----  
>Rapgef2\_[Bactrocera\_dorsalis]\_751774256  
AFTNITLAV---RRALCAVMVFAVVDKAGTV---VMSDGEELDS---WSVLINGAVEIEH

```

---ANGT-----R-E---E-LQMG-DSFGILPTMDKLYHRGVMRTKCD--
-----D-CQFVCITQTDYYRI-QHQGEENTRRHEDEDGRIV-----
>Rapgef2_[Bactrocera_oleae]_929380230
AFTNITLAV---RRALCAVMVFAVVDKAGTV---VMSDGEELDS---WSVLINGAVEIEH
---ANGT-----R-E---E-LQMG-DSFGILPTMDKLYHRGVMRTKCD--
-----D-CQFVCITQTDYYRI-QHQGEENTRRHEDEDGRIV-----
>Rapgef2_[Balaenoptera_acutorostrata_scammoni]_594672686
AFANMTMSV---RRELCAVMVFAVVERAGTI---VLNNGEELDS---WSVILNGSVEVTY
---PDGK-----A-E---I-LCMG-NSFGVSPTMDKEYMKGVMRTKVD--
-----D-CQFVCIAQQDYCRI-LNQVEKNMQKVEE-EGEIV-----
>Rapgef2_[Balearica_regulorum_gibbericeps]_676249633
AFANMTMSV---RRELCAVMVFAVVERAGTI---VLNDGEELDS---WSVILNGSVEVTY
---PDGR-----T-E---I-LCMG-NSFGVSPTMEKEYMKGVMRTKVD--
-----D-CQFVCIAQQDYCRI-LNQVEKNMQKVEE-EGEIV-----
>Rapgef2_[Bos_mutus]_440905105
AFANMTMSV---RRELCAVMVFAVVERAGTI---VLNDGEELDS---WSVILNGSVEVTY
---PDGK-----A-E---I-LCMG-NSFGVSPTMDKEYMKGVMRTKVD--
-----D-CQFVCIAQQDYCRI-LNQVEKNMQKVEE-EGEIV-----
>Rapgef2_[Bos_taurus]_982949932
AFANMTMSV---RRELCAVMVFAVVERAGTI---VLNDGEELDS---WSVILNGSVEVTY
---PDGK-----A-E---I-LCMG-NSFGVSPTMDKEYMKGVMRTKVD--
-----D-CQFVCIAQQDYCRI-LNQVEKNMQKVEE-EGEIV-----
>Rapgef2_[Bubalus_bubalis]_594101752
AFANMTMSV---RRELCAVMVFAVVERAGTI---VLNDGEELDS---WSVILNGSVEVTY
---PDGK-----A-E---I-LCMG-NSFGVSPTMDKEYMKGVMRTKVD--
-----D-CQFVCIAQQDYCRI-LNQVEKNMQKVEE-EGEIV-----
>Rapgef2_[Buceros_rhinoceros_silvestris]_676706740
AFANMTMSV---RRELCAVMVFAVVERAGTI---VLNDGEELDS---WSVILNGSVEVTY
---PDGR-----T-E---I-LCMG-NSFGVSPTMEKEYMKGVMRTKVD--
-----D-CQFVCIAQQDYCRI-LNQVEKNMQKVEE-EGEIV-----
>Rapgef2_[Calypste_anna]_676772321
AFANMTMSV---RRELCAVMVFAVVERAGTI---VLNDGEELDS---WSVILNGSVEVTY
---PDGR-----T-E---I-LCMG-NSFGVSPTMEKEYMKGVMRTKVD--
-----D-CQFVCIAQQDYCRI-LNQVEKNMQKVEE-EGEIV-----
>Rapgef2_[Capra_hircus]_926712293
AFANMTMSV---RRELCAVMVFAVVERAGTI---VLNDGEELDS---WSVILNGSVEVTY
---PDGK-----A-E---I-LCMG-NSFGVSPTMDKEYMKGVMRTKVD--
-----D-CQFVCIAQQDYCRI-LNQVEKNMQKVEE-EGEIV-----
>Rapgef2_[Caprimulgus_carolinensis]_683464460
AFANMTMSV---RRELCAVMVFAVVERAGTI---VLNDGEELDS---WSVILNGSVEVTY
---PDGR-----T-E---I-LCMG-NSFGVSPTMEKEYMKGVMRTKVD--
-----D-CQFVCIAQQDYCRI-LNQVEKNMQKVEE-EGEIV-----
>Rapgef2_[Cariama_cristata]_677270084
AFANMTMSV---RRELCAVMVFAVVERAGTI---VLNDGEELDS---WSVILNGSVEVTY
---PDGR-----T-E---I-LCMG-NSFGVSPTMEKEYMKGVMRTKVD--
-----D-CQFVCIAQQDYCRI-LNQVEKNMQKVEE-EGEIV-----
>Rapgef2_[Cathartes_aura]_677207033
AFANMTMSV---RRELCAVMVFAVVERAGTI---VLNDGEELDS---WSVILNGSVEVTY
---PDGR-----T-E---I-LCMG-NSFGVSPTMEKEYMKGVMRTKVD--
-----D-CQFVCIAQQDYCRI-LNQVEKNMQKVEE-EGEIV-----
>Rapgef2_[Cerapachys_biroi]_759046383
AFTNMTLAV---RRALCAVMVFAVVDRAGMV---VLNDGEELDS---WSVLINGAVEIEH
---SNGE-----I-E---Q-LGLG-DSFGILPTMERLLHRGVMRTKCD--
-----D-CQFVCVTQADYFRI-QHQGEENTRRHE-ENGRVI-----

```

>Rapgef2\_[Ceratotherium\_simum\_simum]\_955490023  
AFANMTMSV---RRELCAVMVFAVVERAGTI---VLNDGEELDS---WSVILNGSVEVTY  
---PDGK-----A-E---I-LCMG-NSFGVSPTMDKEYMKGVMRTKVD--  
-----D-CQFVCIAQQDYCRI-LNQVEKNMQKVEE-EGEIV-----  
>Rapgef2\_[Chelonia\_mydas]\_591353969  
AFANMTMSV---RRELCAVMVFAVVERAGTI---VLNDGEELDS---WSVILNGSVEVTY  
---PDGR-----T-E---I-LCMG-NSFGVSPTMDKEYMKGVMRTKVD--  
-----D-CQFVCIAQQDYCRI-LNQVEKNMQKVEE-EGEIV-----  
>Rapgef2\_[Chlamydotis\_macqueenii]\_677153119  
AFANMTMSV---RRELCAVMVFAVVERAGTI---VLNDGEELDS---WSVILNGSVEVTY  
---PDGR-----T-E---I-LCMG-NSFGVSPTMEKEYMKGVMRTKVD--  
-----D-CQFVCIAQQDYCRI-LNQVEKNMQKVEE-EGEIV-----  
>Rapgef2\_[Chlorocebus\_sabaeus]\_635045457  
AFANMTMSV---RRELCAVMVFAVVERAGTI---VLNDGEELDS---WSVILNGSVEVTY  
---PDGK-----A-E---I-LCMG-NSFGVSPTMDKEYMKGVMRTKVD--  
-----D-CQFVCIAQQDYCRI-LNQVEKNMQKVEE-EGEIV-----  
>Rapgef2\_[Chrysochloris\_asiatica]\_586474854  
AFANMTMSV---RRELCAVMVFAVVERAGTI---VLNDGEELDS---WSVILNGSVEVTY  
---PDGK-----A-E---I-LCMG-NSFGVSPTMDKEYMKGIMRTKVD--  
-----D-CQFVCIAQQDYCRI-LNQVEKNMQKVEE-EGEIV-----  
>Rapgef2\_[Clupea\_harengus]\_831319817  
AFANMTMSV---RRELCAVMVFAVVERAGTV---VLNDGEELDS---WSVILNGSVEVTY  
---PEGR-----A-E---I-LCMG-NSFGVSPTMDKEYMKGVMRTKVD--  
-----D-CQFVCIAQQDYCCI-LNQVEKNMQKVEE-EGEIV-----  
>Rapgef2\_[Colius\_striatus]\_677095238  
AFANMTMSV---RRELCAVMVFAVVERAGTI---VLNDGEELDS---WSVILNGSVEVTY  
---PDGR-----T-E---I-LCMG-NSFGVSPTMEKEYMKGVMRTKVD--  
-----D-CQFVCIAQQDYCRI-LNQVEKNMQKVEE-EGEIV-----  
>Rapgef2\_[Colobus\_angolensis\_palliatus]\_795294381  
AFANMTMSV---RRELCAVMVFAVVERAGTI---VLNDGEELDS---WSVILNGSVEVTY  
---PDGK-----A-E---I-LCMG-NSFGVSPTMDKEYMKGVMRTKVD--  
-----D-CQFVCIAQQDYCRI-LNQVEKNMQKVEE-EGEIV-----  
>Rapgef2\_[Columba\_livia]\_543733807  
AFANMTMSV---RRELCAVMVFAVVERAGTI---VLNDGEELDS---WSVILNGSVEVTY  
---PDGR-----T-E---I-LCMG-NSFGVSPTMEKEYMKGVMRTKVD--  
-----D-CQFVCIAQQDYCRI-LNQVEKNMQKVEE-EGEIV-----  
>Rapgef2\_[Corvus\_cornix\_cornix]\_727064564  
AFANMTMSV---RRELCAVMVFAVVERAGTI---VLNDGEELDS---WSVILNGSVEVTY  
---PDGR-----T-E---I-LCMG-NSFGVSPTMEKEYMKGVMRTKVD--  
-----D-CQFVCIAQQDYCRI-LNQVEKNMQKVEE-EGEIV-----  
>Rapgef2\_[Crassostrea\_gigas]\_762094124  
AFANMTQPI---RRELCAVMVFAVIEQRGTV---VMKDGEELDS---WSVILNGQVEIVH  
---PEGs-----A-E---F-LQMG-DSFGISPTLDKMYHKGTMKTLTD--  
-----D-CQFVCIAQEDYHRI-LDKGKENTEKHVE-EGQVV-----  
>Rapgef2\_[Cricetulus\_griseus]\_1032849679  
AFANMTMSV---RRELCAVMVFAVVERAGTI---VLNDGEELDS---WSVILNGSVEVTY  
---PDGK-----A-E---I-LCMG-NSFGVSPTMDKEYMKGVMRTKVD--  
-----D-CQFVCIAQQDYCCI-LNQVEKNMQKVEE-EGEIV-----  
>Rapgef2\_[Culex\_quinquefasciatus]\_170039216  
AFTNMTFAV---RRDLCSVMVFAVVEKAGTI---VMNDGEELDS---WSVLINGHVEIEH  
---ANGE-----I-E---Y-LHIG-DSFGIMPTMDKLYHRGIMRTKCD--  
-----D-CQFVCITQTDYYRI-QHQGEDNIRKIEK-DGQVI-----  
>Rapgef2\_[Cynoglossus\_semilaevis]\_1035251284  
AFANMTMSV---RRELCAVMVFAVVERAGTI---VLNDGEELDS---WSVILNGSVEVTY

---PDNR-----T-E---I-LCMG-NSFGVSPTMEKEYMKGVMKTKVD--  
-----D-CQFVCIAQQDYCCI-LNQVEKNMQKVEE-EGEIV----  
>Rapgef2\_[Cyphomyrmex\_costatus]\_1009369324  
AFTNMTLAV---RRALCAVMVFAVVDRAGMV---VLNDGEELDS---WSVLINGAVEIEH  
---SNSE-----I-E---Q-LGLG-DSFGILPTMERLLHRGVMRTKCD--  
-----D-CQFVCVTQADYFRI-QHQGEENTRRHE-ENGRVI----  
>Rapgef2\_[Danio\_rerio]\_688532444  
AFASLSVSV---RRELCAVMVFAVVERAGTI---VLNHGEELDS---WSVILNGAVEVIY  
---LDGR-----S-E---S-VCMG-GSFGVCPSMEKQLMTGVMRTKVD--  
-----D-CQFVCIAQQDYCCI-LNQVEQNTQRVEE-EGEIV----  
>Rapgef2\_[Diaphorina\_citri]\_1041553037  
AFTNMTLAV---RKALCGVMVFAVVEKAGTI---VMNDGEELDS---WSVINGCVEVEL  
---SDGR-----S-Q---M-LQVG-DSFGILPTMEKLYHEGVMRTKCD--  
-----D-CQFVCITQTDYYRI-----  
>Rapgef2\_[Diuraphis\_noxia]\_985398052  
AFTNMTLAV---RRALCSVMVFAVVEKAGTV---VMNDGEELDS---WSVLINGHVEVEH  
---ADGI-----P-D---Q-LHMG-DSFGIVPTMERLYHRGVMRTKCD--  
-----D-CQFVCITQTDYYRI-LHQGEENTKRHED-DG-----  
>Rapgef2\_[Drosophila\_takahashii]\_1036740816  
AFTNITLAV---RRALCSVMVFAVVDKAGTV---VMSDGEELDS---WSVLINGAVEIEH  
---AHGS-----R-E---E-LQMG-DSFGILPTMDKLYHRGVMRTKCD--  
-----D-CQFVCITQTDYYRI-QHQGEENTRRHED-----  
>Rapgef2\_[Dufourea\_novaeangliae]\_1016162772  
AFTNMTLAV---RRALCAVMVFAVVERAGMI---VLNDGEELDS---WSVLINGAVEIDH  
---SNGD-----I-E---Q-LHLG-DSFGILPTMERLLHRGVMRTKCD--  
-----D-CQFVCVTQADYFRI-QHQGEENTRRHE-ENGRVI----  
>Rapgef2\_[Echinops\_telfairi]\_507671420  
AFANMTMSV---RRELCAVMVFAVVERAGTI---VLNDGEELDS---WSVILNGSVEVTY  
---PDGK-----A-E---I-LCMG-NSFGVSPTMDKEYMKGVMRTKVD--  
-----D-CQFVCIAQQDYCRI-LNQVEKNMQKVEE-EGEIV----  
>Rapgef2\_[Eptesicus\_fuscus]\_641691941  
AFANMTMSV---RRELCAVMVFAVVERAGTI---VLNDGEELDS---WSVILNGSVEVTY  
---PDGK-----A-E---I-LCMG-NSFGVSPTMDKEYMKGVMRTKVD--  
-----D-CQFVCIAQQDYCRI-LNQVEKNMQKVEE-EGEIV----  
>Rapgef2\_[Equus\_asinus]\_958803741  
AFANMTMSV---RRELCAVMVFAVVERAGTI---VLNDGEELDS---WSVILNGSVEVTY  
---PDGK-----A-E---I-LCMG-NSFGVSPTMDKEYMKGVMRTKVD--  
-----D-CQFVCIAQQDYCRI-LNQVEKNMQKVEE-EGEIV----  
>Rapgef2\_[Equus\_caballus]\_953847560  
AFANMTMSV---RRELCAVMVFAVVERAGTI---VLNDGEELDS---WSVILNGSVEVTY  
---PDGK-----A-E---I-LCMG-NSFGVSPTMDKEYMKGVMRTKVD--  
-----D-CQFVCIAQQDYCRI-LNQVEKNMQKVEE-EGEIV----  
>Rapgef2\_[Esox\_lucius]\_742092552  
AFANMTMSV---RRELCAVMVFAVVERAGTI---VLNDGEELDS---WSVILNGSVEVTY  
---PEGR-----P-E---I-LCMG-NSFGVSPTMEKEYMKGVMKTKVD--  
-----D-CQFVCIAQQDYCCI-LNQVEKNMQKVEE-EGEIV----  
>Rapgef2\_[Falco\_cherrug]\_541968958  
AFANMTMSV---RRELCAVMVFAVVERAGTI---VLNDGEELDS---WSVILNGSVEVTY  
---PDGR-----T-E---I-LCMG-NSFGVSPTMEKEYMKGVMRTKVD--  
-----D-CQFVCIAQQDYCRI-LNQVEKNMQKVEE-EGEIV----  
>Rapgef2\_[Felis\_catus]\_755716579  
AFANMTMSV---RRELCAVMVFAVVERAGTI---VLNDGEELDS---WSVILNGSVEVTY  
---PDGK-----A-E---I-LCMG-NSFGVSPTMDKEYMKGVMRTKVD--  
-----D-CQFVCIAQQDYCRI-LNQVEKNMQKVEE-EGEIV----



>Rapgef2\_[Ficedula\_albicollis]\_1020979017  
AFANMTMSV---RRELCAVMVFAVVERAGTI---VLNDGEELDS---WSVILNGSVEVTY  
---PDGR-----T-E---I-LCMG-NSFGVSPTMEKEYMKGVMRTKVD--  
-----D-CQFVCIAQQDYCRI-LNQVEKNMQKVEE-EGEIV----  
>Rapgef2\_[Fukomys\_damarensis]\_731224407  
AFANMTMSV---RRELCAVMVFAVVERAGTI---VLNDGEELDS---WSVILNGSVEVTY  
---PDGK-----A-E---I-LCMG-NSFGVSPTMDKEYMKGVMRTKVD--  
-----D-CQFVCIAQQDYCRI-LNQVEKNMQKVEE-EGEIV----  
>Rapgef2\_[Fundulus\_heteroclitus]\_831545540  
AFANMTMSV---RRELCAVMVFAVVERAGTI---VLNDGEELDS---WSVILNGSVEVTH  
---PDGQ-----T-E---M-LCMG-NSFGVSPTMEKEFMKGVMRTKVD--  
-----D-CQFVCIAQQEYCCI-LNQVEKNMQKVEE-EGEIV----  
>Rapgef2\_[Galeopterus\_variegatus]\_667288983  
AFANMTMSV---RRELCAVMVFAVVERAGTI---VLNDGEELDS---WSVILNGSVEVTY  
---PDGK-----A-E---I-LCMG-NSFGVSPTMDKEYMKGVMRTKVD--  
-----D-CQFVCIAQQDYCRI-LNQVEKNMQKVEE-EGEIV----  
>Rapgef2\_[Geospiza\_fortis]\_543244460  
AFANMTMSV---RRELCAVMVFAVVERAGTI---VLNDGEELDS---WSVILNGSVEVTY  
---PDGR-----T-E---I-LCMG-NSFGVSPTMEKEYMKGVMRTKVD--  
-----D-CQFVCIAQQDYCRI-LNQVEKNMQKVEE-EGEIV----  
>Rapgef2\_[Haliaeetus\_albicilla]\_700326780  
AFANMTMSV---RRELCAVMVFAVVERAGTI---VLNDGEELDS---WSVILNGSVEVTY  
---PDGR-----T-E---I-LCMG-NSFGVSPTMEKEYMKGVMRTKVD--  
-----D-CQFVCIAQQDYCRI-LNQVEKNMQKVEE-EGEIV----  
>Rapgef2\_[Haliaeetus\_leucocephalus]\_729726817  
AFANMTMSV---RRELCAVMVFAVVERAGTI---VLNDGEELDS---WSVILNGSVEVTY  
---PDGR-----T-E---I-LCMG-NSFGVSPTMEKEYMKGVMRTKVD--  
-----D-CQFVCIAQQDYCRI-LNQVEKNMQKVEE-EGEIV----  
>Rapgef2\_[Harpegnathos\_saltator]\_749732955  
AFTNMTLAV---RRALCAVMVFAVVERAGMV---VLNDGEELDS---WSVLINGAVEVEQ  
---SNGE-----I-Q---Q-LCLG-DCFGILPTMDRLLHCGVMRTKCD--  
-----D-CQFVCVTQADYFRI-QHQGEENTRRHE-ENGRVI----  
>Rapgef2\_[Heterocephalus\_glaber]\_513014560  
AFANMTMSV---RRELCAVMVFAVVERAGTT---VLNGGEELDS---WSVILNGSVEVTY  
---PDGK-----A-E---I-LCMG-NSFGVSPTMDKEYMKGVMRTKVD--  
-----D-CQFVCIAQQDYCRI-LNQVEKNMQKVEE-EGEIVMV--  
>Rapgef2\_[Ictalurus\_punctatus]\_1042371527  
AFANMTMSV---RRELCAVMVFAVVERAGTI---VLNDGEELDS---WSVILNGSVEVTY  
---PEGR-----T-E---I-LCMG-NSFGVSPTSREKEFMKGVMKTKVD--  
-----D-CQFVCIAQQDYCCI-LNQVEKNMQKVEE-EGEIV----  
>Rapgef2\_[Ictidomys\_tridecemlineatus]\_914915197  
AFANMTMSV---RRELCAVMVFAVVERAGTI---VLNDGEELDS---WSVILNGSVEVTY  
---PDGK-----A-E---I-LCMG-NSFGVSPTMDKEYMKGVMRTKVD--  
-----D-CQFVCIAQQDYCRI-LNQVEKNMQKVEE-EGEIV----  
>Rapgef2\_[Kryptolebias\_marmoratus]\_1041100152  
AFANMTMSV---RRELCAVMVFAVVERAGTI---VLNDGEELDS---WSVILNGSVEVTY  
---PDGR-----T-E---I-LCMG-NSFGVSPTMEKEYMKGVMKTKVD--  
-----D-CQFVCIAQQDYCCI-LNQVEKNMQKVEE-EGEIV----  
>Rapgef2\_[Latimeria\_chalumnae]\_556992865  
AFANMTMSV---RKELCAVMVFAVVERAGTI---VLNDGEELDS---WSVILNGSVEVTY  
---PDGR-----T-E---I-LCMG-NSFGVSPTMEKEYMKGVMKTKVD--  
-----D-CQFVCIAQQDYCRI-LNQVEKNMQKVEE-EGEIV----  
>Rapgef2\_[Lepisosteus\_oculatus]\_972965615  
AFANMTMSV---RRELCAVMVFAVVERAGTI---VLNDGEELDS---WSVILNGSVEVTY

```

---PDGR-----T-E---I-LCMG-NSFGVSPTLEKEYMKGVMKTKVD--
-----D-CQFVCIAQQDYCCI-LNQVEKNMQKVEE-EGEIV----
>Rapgef2_[Leptonychotes_weddellii]_585176488
AFANMTMSV---RRELCAVMVFAVVERAGTI---VLNDGEELDS---WSVILNGSVEVTY
---PDGK-----A-E---I-LCMG-NSFGVSPTMDKEYMKGVMRTKVD--
-----D-CQFVCIAQQDYCRI-LNQVEKNMQKVEE-EGEIV----
>Rapgef2_[Limulus_polyphemus]_926648335
AFANMTIAV---RRALCAVMVFAVQKAGTV---VMNDGEELDS---WSVIVNGQVEVDF
---PDGT-----S-H---E-LHVG-DSFGITATTEKMYHEGVMRTMLD--
-----D-CQFVCIAQSDYHKI-LHQGEENTRKHEE-NGQVV----
>Rapgef2_[Lipotes_vexillifer]_602704040
AFANMTMSV---RRELCAVMVFAVVERAGTI---VLNNGEELDS---WSVILNGSVEVTY
---PDGK-----A-E---I-LCMG-NSFGVSPTMDKEYMKGVMRTKVD--
-----D-CQFVCIAQQDYCRI-LNQVEKNMQKVEE-EGEIV----
>Rapgef2_[Macaca_fascicularis]_544435351
AFANMTMSV---RRELCAVMVFAVVERAGTI---VLNDGEELDS---WSVILNGSVEVTY
---PDGK-----A-E---I-LCMG-NSFGVSPTMDKEYMKGVMRTKVD--
-----D-CQFVCIAQQDYCRI-LNQVEKNMQKVEE-EGEIV----
>Rapgef2_[Macaca_mulatta]_966945521
AFANMTMSV---RRELCAVMVFAVVERAGTI---VLNDGEELDS---WSVILNGSVEVTY
---PDGK-----A-E---I-LCMG-NSFGVSPTMDKEYMKGVMRTKVD--
-----D-CQFVCIAQQDYCRI-LNQVEKNMQKVEE-EGEIV----
>Rapgef2_[Macaca_nemestrina]_795381724
AFANMTMSV---RRELCAVMVFAVVERAGTI---VLNDGEELDS---WSVILNGSVEVTY
---PDGK-----A-E---I-LCMG-NSFGVSPTMDKEYMKGVMRTKVD--
-----D-CQFVCIAQQDYCRI-LNQVEKNMQKVEE-EGEIV----
>Rapgef2_[Mandrillus_leucophaeus]_795325379
AFANMTMSV---RRELCAVMVFAVVERAGTI---VLNDGEELDS---WSVILNGSVEVTY
---PDGK-----A-E---I-LCMG-NSFGVSPTMDKEYMKGVMRTKVD--
-----D-CQFVCIAQQDYCRI-LNQVEKNMQKVEE-EGEIV----
>Rapgef2_[Melipona_quadrifasciata]_925684072
AFTNMTLAV---RRALCAVMVFAVVERAGMI---VLNDGEELDS---WSVLINGAVEIEH
---SNGE-----I-E---Q-LHLG-DSFGILPTMERLLHRGVMRTKCD--
-----D-CQFVCVTQADYFRI-QHQGEENTRRHE-ENGRVI----
>Rapgef2_[Melopsittacus_undulatus]_884809301
AFANMTMSV---RRELCAVMVFAVVERAGTI---VLNDGEELDS---WSVILNGSVEVTY
---PDGR-----T-E---I-LCMG-NSFGVSPTMEKEYMKGVMRTKVD--
-----D-CQFVCIAQQDYCRI-LNQVEKNMQKVEE-EGEIV----
>Rapgef2_[Miniopterus_natalensis]_1016655590
AFANMTMSV---RRELCAVMVFAVVERAGTI---VLNDGEELDS---WSVILNGSVEVTY
---PDGK-----A-E---I-LCMG-NSFGVSPTMDKEYMKGVMRTKVD--
-----D-CQFVCIAQQDYCRI-LNQVEKNMQKVEE-EGEIV----
>Rapgef2_[Monodelphis_domestica]_612030789
AFANMTMSV---RRELCAVMVFAVVERAGTI---VLNDGEELDS---WSVILNGSVEVTY
---PDGR-----T-E---I-LCMG-NSFGVSPTMDKEYMKGVMRTKVD--
-----D-CQFVCIAQQDYCRI-LNQVEKNMQKVEE-EGEIV----
>Rapgef2_[Mus_musculus]_887221696
AFANMTMSV---RRELCAVMVFAVVERAGTI---VLNDGEELDS---WSVILNGSVEVTY
---PDGK-----A-E---I-LCMG-NSFGVSPTMDKEYMKGVMRTKVD--
-----D-CQFVCIAQQDYCRI-LNQVEKNMQKVEE-EGEIV----
>Rapgef2_[Mustela_putorius_furo]_859933733
AFANMTMSV---RRELCAVMVFAVVERAGTI---VLNDGEELDS---WSVILNGSVEVTY
---PDGK-----A-E---I-LCMG-NSFGVSPTMDKEYMKGVMRTKVD--
-----D-CQFVCIAQQDYCRI-LNQVEKNMQKVEE-EGEIV----

```

>Rapgef2\_[Myotis\_davidii]\_584034002  
 AFANMTMSV---RRELCAVMVFAVVERAGTI---VLNDGEELDS---WSVILNGSVEVTY  
 ---PDGK-----A-E---I-LCMG-NSFGVSPTMDKEYMKGVMRTKVD--  
 -----D-CQFVCIAQQDYCRI-LNQVEKNMQKVEE-EGEIV----  
 >Rapgef2\_[Nannospalax\_galili]\_674089174  
 AFANMTMSV---RRELCAVMVFAVVERAGTI---VLNDGEELDS---WSVILNGSVEVTY  
 ---PDGK-----A-E---I-LCMG-NSFGVSPTMDKEYMKGVMRTKVD--  
 -----D-CQFVCIAQQDYCRI-LNQVEKNMQKVEE-EGEIV----  
 >Rapgef2\_[Nasonia\_vitripennis]\_1032757814  
 AFTNMTLAV---RRALCAVMVFAVVERAGMV---VLTDGEELDS---WSVLINGTVEVEH  
 -----NGT-----V-D---Q-LHVG-DSFGILPTMETLLHRGIMRTKCD--  
 -----D-CQFVCVTQVDYRI-QHQGEENTRRHE-EDGRVI-----  
 >Rapgef2\_[Nothobranchius\_furzeri]\_1007706565  
 AFANMTMSV---RRELCAVMVFAVVERAGTI---VLNDGEELDS---WSVILNGSVEVTH  
 ---PDSR-----T-E---I-LCMG-NSFGVSPTMEKEYMKGVMKTKVD--  
 -----D-CQFVCIAQQEYCCI-LNQVEKNMQKVEE-EGEIV----  
 >Rapgef2\_[Notothenia\_coriiceps]\_736169539  
 AFANMTMSV---RRELCAVMVFAVVERAGTI---VLNDGEELDS---WSVILNGSVEVTY  
 ---PEGR-----T-E---I-LCMG-NSFGVSPTMEKEYMKGVMKTKVD--  
 -----D-CQFVCIAQQDYCCI-LNQVEKNMQKVEE-EGEIV----  
 >Rapgef2\_[Ochotona\_princeps]\_837819646  
 AFANMTMSV---RRELCAVMVFAVVERAGTI---VLNDGEELDS---WSVILNGSVEVTY  
 ---PDGK-----A-E---I-LCMG-NSFGVSPTMDKEYMKGVMRTKVD--  
 -----D-CQFVCIAQQDYCRI-LNQVEKNMQKVEE-EGEIV----  
 >Rapgef2\_[Octodon\_degus]\_820993488  
 AFANMTMSV---RRELCAVMVFAVVERAGTI---VLNDGEELDS---WSVILNGSVEVTY  
 ---PDGK-----A-E---I-LCMG-NSFGVSPTMDKEHMKGMRTKVD--  
 -----D-CQFVCIAQQDYCRI-LNQVEKNMQKVEE-EGEIV----  
 >Rapgef2\_[Odobenus\_rosmarus\_divergens]\_823395200  
 AFANMTMSV---RRELCAVMVFAVVERAGTI---VLNDGEELDS---WSVILNGSVEVTY  
 ---PDGK-----A-E---I-LCMG-NSFGVSPTMDKEYMKGVMRTKVD--  
 -----D-CQFVCIAQQDYCRI-LNQVEKNMQKVEE-EGEIV----  
 >Rapgef2\_[Opisthocomus\_hoazin]\_700389884  
 AFANMTMSV---RRELCAVMVFAVVERAGTI---VLNDGEELDS---WSVILNGSVEVTY  
 ---PDGR-----T-E---I-LCMG-NSFGVSPTMEKEYMKGVMRTKVD--  
 -----D-CQFVCIAQQDYCRI-LNQVEKNMQKVEE-EGEIV----  
 >Rapgef2\_[Ornithorhynchus\_anatinus]\_1019060572  
 AFANMTMSV---RRELCAVMVFAVVERAGTI---VLNDGEELDS---WSVILNGSVEVTY  
 ---PDGR-----T-E---I-LCMG-NSFGVSPTMDKEYMKGVMRTKVD--  
 -----D-CQFVCIAQQDYCRI-LNQVEKNMQKVEE-EGEIV----  
 >Rapgef2\_[Orycteropus\_afer\_afer]\_634878373  
 AFANMTMSV---RRELCAVMVFAVVERAGTI---VLNDGEELDS---WSVILNGSVEVTY  
 ---PDGK-----A-E---I-LCMG-NSFGVSPTMDKEYMKGVMRTKVD--  
 -----D-CQFVCIAQQDYCRI-LNQVEKNMQKVEE-EGEIV----  
 >Rapgef2\_[Oryctolagus\_cuniculus]\_655879031  
 AFANMTMSV---RRELCAVMVFAVVERAGTI---VLNDGEELDS---WSVILNGSVEVTY  
 ---PDGK-----A-E---I-LCMG-NSFGVSPTMDKEYMKGVMRTKVD--  
 -----D-CQFVCIAQQDYCRI-LNQVEKNMQKVEE-EGEIV----  
 >Rapgef2\_[Ovis\_aries\_musimon]\_803287889  
 AFANMTMSV---RRELCAVMVFAVVERAGTI---VLNDGEELDS---WSVILNGSVEVTY  
 ---PDGK-----A-E---I-LCMG-NSFGVSPTMDKEYMKGVMRTKVD--  
 -----D-CQFVCIAQQDYCRI-LNQVEKNMQKVEE-EGEIV----  
 >Rapgef2\_[Pan\_paniscus]\_931570497  
 AFANMTMSV---RRELCAVMVFAVVERAGTI---VLNDGEELDS---WSVILNGSVEVTY

---PDGK-----A-E---I-LCMG-NSFGVSPTMDKEYMKGVMRTKVD--  
-----D-CQFVCIAQQDYCRI-LNQVEKNMQKVEE-EGEIV----  
>Rapgef2\_[Pan\_troglodytes]\_1034166384  
AFANMTMSV---RRELCAVMVFAVVERAGTI---VLNDGEELDS---WSVILNGSVEVTY  
---PDGK-----A-E---I-LCMG-NSFGVSPTMDKEYMKGVMRTKVD--  
-----D-CQFVCIAQQDYCRI-LNQVEKNMQKVEE-EGEIV----  
>Rapgef2\_[Panthera\_tigris\_altaica]\_987408704  
AFANMTMSV---RRELCAVMVFAVVERAGTI---VLNDGEELDS---WSVILNGSVEVTY  
---PDGK-----A-E---I-LCMG-NSFGVSPTMDKEYMKGVMRTKVD--  
-----D-CQFVCIAQQDYCRI-LNQVEKNMQKVEE-EGEIV----  
>Rapgef2\_[Papio\_anubis]\_685543722  
AFANMTMSV---RRELCAVMVFAVVERAGTI---VLNDGEELDS---WSVILNGSVEVTY  
---PDGK-----A-E---I-LCMG-NSFGVSPTMDKEYMKGVMRTKVD--  
-----D-CQFVCIAQQDYCRI-LNQVEKNMQKVEE-EGEIV----  
>Rapgef2\_[Parus\_major]\_998685098  
AFANMTMSV---RRELCAVMVFAVVERAGTI---VLNDGEELDS---WSVILNGSVEVTY  
---PDGR-----T-E---I-LCMG-NSFGVSPTMEKEYMKGVMRTKVD--  
-----D-CQFVCIAQQDYCRI-LNQVEKNMQKVEE-EGEIV----  
>Rapgef2\_[Pelecanus\_crispus]\_677469268  
AFANMTMSV---RRELCAVMVFAVVERAGTI---VLNDGEELDS---WSVILNGSVEVTY  
---PDGR-----T-E---I-LCMG-NSFGVSPTMEKEYMKGVMRTKVD--  
-----D-CQFVCIAQQDYCRI-LNQVEKNMQKVEE-EGEIV----  
>Rapgef2\_[Peromyscus\_maniculatus\_bairdii]\_1008761808  
AFANMTMSV---RRELCAVMVFAVVERAGTI---VLNDGEELDS---WSVILNGSVEVTY  
---PDGK-----A-E---I-LCMG-NSFGVSPTMDKEYMKGVMRTKVD--  
-----D-CQFVCIAQQDYCRI-LNQVEKNMQKVEE-EGEIV----  
>Rapgef2\_[Phaethon\_lepturus]\_723143940  
AFANMTMSV---RRELCAVMVFAVVERAGTI---VLNDGEELDS---WSVILNGSVEVTY  
---PDGR-----T-E---I-LCMG-NSFGVSPTMEKEYMKGVMRTKVD--  
-----D-CQFVCIAQQDYCRI-LNQVEKNMQKVEE-EGEIV----  
>Rapgef2\_[Phalacrocorax\_carbo]\_679211993  
AFANMTMSV---RRELCAVMVFAVVERAGTI---VLNDGEELDS---WSVILNGSVEVTY  
---PDGR-----T-E---I-LCMG-NSFGVSPTMEKEYMKGVMRTKVD--  
-----D-CQFVCIAQQDYCRI-LNQVEKNMQKVEE-EGEIV----  
>Rapgef2\_[Poecilia\_formosa]\_1025435394  
AFANMTMSV---RRELCAVMVFAVVERAGTI---VLNDGEELDS---WSVILNGSVEVTY  
---PDSR-----T-E---M-LCMG-NSFGVSPTMEKEFMKGVMRTKVD--  
-----D-CQFVCIAQQDYCCI-LNQVEKNMQKVEE-EGEIV----  
>Rapgef2\_[Propithecus\_coquereli]\_826315269  
AFANMTMSV---RRELCAVMVFAVVERAGTI---VLNDGEELDS---WSVILNGSVEVTY  
---PDGK-----A-E---I-LCMG-NSFGVSPTMDKEYMKGVMRTKVD--  
-----D-CQFVCIAQQDYCRI-LNQVEKNMQKVEE-EGEIV----  
>Rapgef2\_[Protobothrops\_mucrosquamatus]\_1002581465  
AFANMTMSV---RRELCAVMVFAVVERAGTI---VLNDGEELDS---WSVILNGSVEVTY  
---PDGR-----T-E---I-LCMG-NSFGVSPTMDKEYMKGIMRTKVD--  
-----D-CQFVCIAQQDYCRI-LNQVEKNMQKVEE-EGEIV----  
>Rapgef2\_[Pterocles\_gutturalis]\_704510117  
AFANMTMSV---RRELCAVMVFAVVERAGTI---VLNDGEELDS---WSVILNGSVEVTY  
---PDGR-----T-E---I-LCMG-NSFGVSPTMEKEYMKGVMRTKVD--  
-----D-CQFVCIAQQDYCRI-LNQVEKNMQKVEE-EGEIV----  
>Rapgef2\_[Python\_bivittatus]\_602665199  
AFANMTMSV---RRELCAVMVFAVVERAGTI---VLNDGEELDS---WSVILNGSVEVTY  
---PDGR-----T-E---I-LCMG-NSFGVSPTMDKEYMKGIMRTKVD--  
-----D-CQFVCIAQQDYCRI-LNQVEKNMQKVEE-EGEIV----

>Rapgef2\_[Rhinopithecus\_roxellana]\_724803574  
AFANMTMSV---RRELCAVMVFAVVERAGTI---VLNDGEELDS---WSVILNGSVEVTY  
---PDGK-----A-E---I-LCMG-NSFGVSPTMDKEYMKGVMRTKVD--  
-----D-CQFVCIAQQDYCRI-LNQVEKNMQKVEE-EGEIV----  
>Rapgef2\_[Rousettus\_aegyptiacus]\_1012013897  
AFANMTMSV---RRELCAVMVFAVVERAGTI---VLNDGEELDS---WSVILNGSVEVTY  
---PDGK-----A-E---I-LCMG-NSFGVSPTMDKEYMKGVMRTKVD--  
-----D-CQFVCIAQQDYCRI-LNQVEKNMQKVEE-EGEIV----  
>Rapgef2\_[Saimiri\_boliviensis\_boliviensis]\_403272230  
AFANMTMSV---RRELCAVMVFAVVERAGTI---VLNDGEELDS---WSVILNGSVEVTY  
---PDGK-----A-E---I-LCMG-NSFGVSPTMDKEYMKGVMRTKVD--  
-----D-CQFVCIAQQDYCRI-LNQVEKNMQKVEE-EGEIV----  
>Rapgef2\_[Sarcophilus\_harrisii]\_821490713  
AFANMTMSV---RRELCAVMVFAVVERAGTI---VLNDGEELDS---WSVILNGSVEVTY  
---PDGR-----T-E---I-LCMG-NSFGVSPTMDKEYMKGVMRTKVD--  
-----D-CQFVCIAQQDYCRI-LNQVEKNMQKVEE-EGEIV----  
>Rapgef2\_[Scleropages\_formosus]\_938067446  
AFANMTMSV---RRELCAVMVFAVVERAGTV---VLNDGEELDS---WSVILNGSVEVTH  
---PDGR-----T-E---I-LCMG-NSFGVSPTMEKEFMKGVMKTKVD--  
-----D-CQFVCIAQQDYCCI-LNQVEKNMQKVEE-EGEIV----  
>Rapgef2\_[Sinocyclocheilus\_anhuiensis]\_1024980578  
AFANMTMSV---RRELCAVMVFAVVERAGTV---VLNDGEELDS---WSVILNGSVEVTH  
---PDGR-----T-E---I-LCMG-NSFGVSPTMEKEYMKGVMKTKVD--  
-----D-CQFVCIAQQDYCCI-LNQVEKNMQKVEE-EGEIV----  
>Rapgef2\_[Sinocyclocheilus\_grahami]\_1020470969  
AFANMTMSV---RRELCAVMVFAVVERAGTV---VLNDGEELDS---WSVILNGSVEVTH  
---PDGR-----T-E---I-LCMG-NSFGVSPTMEKEYMKGVMKTKVD--  
-----D-CQFVCIAQQDYCCI-LNQVEKNMQKVEE-EGEIV----  
>Rapgef2\_[Sinocyclocheilus\_rhinoceros]\_1025212222  
AFANMTMSV---RRELCAVMVFAVVERAGTV---VLNDGEELDS---WSVILNGSVEVTH  
---PDGR-----T-E---I-LCMG-NSFGVSPTMEKEYMKGVMKTKVD--  
-----D-CQFVCIAQQDYCCI-LNQVEKNMQKVEE-EGEIV----  
>Rapgef2\_[Sorex\_araneus]\_505792953  
AFANMTMSV---RRELCAVMVFAVVERAGTI---VLNDGEELDS---WSVILNGSVEVTY  
---PDGK-----A-E---I-LCMG-NSFGVSPTMDKEYMKGVMRTKVD--  
-----D-CQFVCIAQQDYCRI-LNQVEKNMQKVEE-EGEIV----  
>Rapgef2\_[Strongylocentrotus\_purpuratus]\_780127327  
AFANMTMSV---RRALCSVMVFAVVSAGTV---VMKDGEELDS---WSVILNGHVEVSK  
---PDES-----V-D---E-LHLG-DSFGVKPTMEKQTHSGVMRTTVD--  
-----D-CQFVCIAQEHYYRI-LTQGEENIRRISE-DGVLV----  
>Rapgef2\_[Struthio\_camelus\_australis]\_678215500  
AFANMTMSV---RRELCAVMVFAVVERAGTI---VLNDGEELDS---WSVILNGSVEVTY  
---PDGR-----T-E---I-LCMG-NSFGVSPTMEKEYMKGVMRTKVD--  
-----D-CQFVCIAQQDYCRI-LNQVEKNMQKVEE-EGEIV----  
>Rapgef2\_[Sturnus\_vulgaris]\_959071480  
AFANMTMSV---RRELCAVMVFAVVERAGTI---VLNDGEELDS---WSVILNGSVEVTY  
---PDGR-----T-E---I-LCMG-NSFGVSPTMEKEYMKGVMRTKVD--  
-----D-CQFVCIAQQDYCRI-LNQVEKNMQKVEE-EGEIV----  
>Rapgef2\_[Takifugu\_rubripes]\_768938240  
AFANMTMSV---RRELCAVMVFAVVERAGTI---VLNDGEELDS---WSVILNGSVEVTY  
---PEGR-----T-E---I-LCMG-NSFGVSPTMEKEYMKGVMKTKVD--  
-----D-CQFVCIAQQDYCCI-LNQVEKNMQKVEE-EGEIV----  
>Rapgef2\_[Trachymyrmex\_septentrionalis]\_1009425222  
AFTNMTLAV---RRALCAVMVFAVVDRAGMV---VLNDGEELDS---WSVLINGAVEIEH

```

---SNGE-----I-E---Q-LGLG-DSFGILPTMERLLHRGVMRTKCD--
-----D-CQFVCVTQADYFRI-QHQGEENTRRHE-ENGRVI-----
>Rapgef2_[Trichechus_manatus_latirostris]_471397359
AFANMTMSV---RRELCAMVMFAVVERAGTI---VLNDGEELDS---WSVILNGSVEVTY
---PDGK-----A-E---I-LCMG-NSFGVSPTMDKEYMKGIMRTKVD--
-----D-CQFVCIAQQDYCRI-LNQVEKNMQKVEE-EGEIV-----
>Rapgef2_[Tyto_alba]_701382803
AFANMTMSV---RRELCAMVMFAVVERAGTI---VLNDGEELDS---WSVILNGSVEVTY
---PDGR-----T-E---I-LCMG-NSFGVSPTMEKEYMKGVMRTKVD--
-----D-CQFVCIAQQDYCRI-LNQVEKNMQKVEE-EGEIV-----
>Rapgef2_[Ursus_maritimus]_670985380
AFANMTMSV---RRELCAMVMFAVVERAGTI---VLNDGEELDS---WSVILNGSVEVTY
---PDGK-----A-E---I-LCMG-NSFGVSPTMDKEYMKGVMRTKVD--
-----D-CQFVCIAQQDYCRI-LNQVEKNMQKVEE-EGEIV-----
>Rapgef2_[Vicugna_pacos]_970736793
AFANMTMSV---RRELCAMVMFAVVERAGTI---VLNDGEELDS---WSVILNGSVEVTY
---PDGK-----A-E---I-LCMG-NSFGVSPTMDKEYMKGVMRTKVD--
-----D-CQFVCIAQQDYCRI-LNQVEKNMQKVEE-EGEIV-----
>Rapgef2_[Vollenhovia_emoryi]_795102090
AFTNMTLAV---RRALCAVMVFAVVDRAGMV---VLNDGEELDS---WSVLINGAVEIEH
---TSGE-----I-E---Q-LGLG-DSFGILPTMERLLHRGVMRTKCD--
-----D-CQFVCVTQADYFRI-QHQGEENTRRHE-ENGRVI-----
>Rapgef2_[Xenopus_laevis]_147907136
AFANMTMSV---RRELCAMVMFAVVERAGTV---VLNDGEELDS---WSVILNGSVEVTY
---PDGR-----T-E---I-LCMG-NSFGVSPTMEKEYMKGVMRTKVD--
-----D-CQFVCIAQQDYCRI-LNQVEKNMQKVEE-EGEIV-----
>Rapgef2_[Zonotrichia_albicollis]_929469278
AFANMTMSV---RRELCAMVMFAVVERAGTI---VLNDGEELDS---WSVILNGSVEVTY
---PDGR-----T-E---I-LCMG-NSFGVSPTMEKEYMKGVMRTKVD--
-----D-CQFVCIAQQDYCRI-LNQVEKNMQKVEE-EGEIV-----
>Rapgef2_[Zootermopsis_nevadensis]_646721548
AFTNMTLAV---RRALCSVMVFAVVEKAGTV---VMNDGEELDS---WSVLINGHVEVEH
---VNGE-----T-E---Q-LQVG-DSFGILPTMDKLYHRGVMRTKCD--
-----D-CQFVCITQTDYYRI-QHQGEENIRRHEE-DGRVV-----
>Rapgef3_[Acinonyx_jubatus]_961722103
AVAHLNSNV---KRELA AVLLEPHSRAGTV---LFSQGDKGTS---WYIIWKGSVNVVT
H----GKGL-----V-T---T-LHEG-DDFGQLALVNDAPRAATIILRED--
-----N-CHFLRVDKQDFNRI-IKDVEAKTMRLEEKGKVV-----
>Rapgef3_[Ailuropoda_melanoleuca]_752406281
AVAHLNSNV---KRELA AVLLEPHSKAGTV---LFSQGDKGTS---WYIIWKGSVNVVT
H----GKGL-----V-T---T-LHEG-DDFGQLALVNDAPRAATIILRED--
-----N-CHFLRVDKQDFNRI-IKDVEAKTMRLEEKGKVV-----
>Rapgef3_[Alligator_mississippiensis]_950944900
AVAYLSSSV---KRELASVVL FESHARAGTV---LFSQGDKGTS---WYILWKGSVNVVT
H----GKGL-----V-T---T-LHEG-DDFGQLALVNDAPRAATIILRED--
-----S-CHFLRVDKHDFNRI-LKDVEANTIRLKEHGKVV-----
>Rapgef3_[Alligator_sinensis]_944358354
AVAYLSSSV---KRELASVVL FESHARAGTV---LFSQGDKGTS---WYILWKGSVNVVT
H----GKGL-----V-T---T-LHEG-DDFGQLALVNDAPRAATIILRED--
-----S-SHFLRVDKHDFNRI-LKDVEANTIRLKEHGKVV-----
>Rapgef3_[Anolis_carolinensis]_1033369210
AVAHLSSSV---KRELA AVL FESHTKAGTV---LFSQGDKATS---WYIIWKGSVNVVT
H----DKGL-----V-S---T-LHEG-DEFGQLALVNDAPRAATIILRED--
-----N-CHFLRVDKRDFNRI-LKDVEANTMRLKEHGKVV-----

```

>Rapgef3\_[Anser\_cygnoides\_domesticus]\_902933497  
AVAHLNSNV---KRELAAVLMFESHQRAGTV---LFSQGDKGTS---WYIVWKGSVNVVT  
H----GKGL-----V-A---T-LHEG-DDFGQLALVNDAPRAASIILRED--  
-----N-CHFLRVDKQDFNHI-LKDVEANTMRLKEHGKVV-----  
>Rapgef3\_[Aotus\_nancymae]\_817288343  
AVAHLNSNV---KRELAAVLLFEPHSHKAGTV---LFSQGDKGTS---WYIIWKGSVNVVT  
H----GKGL-----V-T---T-LHEG-DDFGQLALVNDAPRAATIILRED--  
-----N-CHFLRVDKQDFNRI-IKDVEAKTMRLEEHGKVV-----  
>Rapgef3\_[Aptenodytes\_forsteri]\_675309006  
AVAHLNSNV---KRELASVLMFESHQRAGTV---LFSQGDKGTS---WYIVWKGSVNVVT  
H----GKGL-----V-A---T-LHEG-DDFGQLALVNDAPRAATIILRED--  
-----N-CHFLRVDKQDFNHI-LKDVEANTMRLKEHGKVV-----  
>Rapgef3\_[Apteryx\_australis\_mantelli]\_926500193  
AVAHLNSNV---KRELASVLMFESHQRAGTV---LFSQGDKGTS---WYIIWKGSVNVVT  
H----GKGL-----V-A---T-LHEG-DDFGQLALVNDAPRAATIILRED--  
-----N-CHFLRVDKQDFNRI-LKDVEANTMRLKEHGKVV-----  
>Rapgef3\_[Aquila\_chrysaetos\_canadensis]\_768403048  
AVAHLNSNV---KRELASVLMFESHQRAGTV---LFSQGDKGTS---WYIIWKGSVNVVT  
H----GKGL-----V-A---T-LHEG-DDFGQLALVNDAPRAATIILRED--  
-----N-CHFLRVDKQDFNHI-LKDVEANTMRLKEHGKVV-----  
>Rapgef3\_[Austrofundulus\_limnaeus]\_928045560  
AAAHLNSASV---RKELAAVLVFESHAKAGTV---LFSQGDKGTS---WYIIWKGSVNVIT  
H----GKGL-----V-T---T-LHEG-EDFGQLALLNDAPRAATIILRED--  
-----N-CHFLRVDKQDFIRI-LKDVEANTVRLEEHGKTV-----  
>Rapgef3\_[Balaenoptera\_acutorostrata\_scammoni]\_594662223  
AVAHLNSNV---KRELAAVLLFEPHSHKAGTV---LFSQGDKGTS---WYIIWKGSVNVVT  
H----GKGL-----V-T---T-LHEG-DDFGQLALVNDAPRAATIILRED--  
-----N-CHFLRVDKQDFNRI-IKDVEAKTMRLEEHGKVV-----  
>Rapgef3\_[Bison\_bison\_bison]\_742108280  
AVAHLNSNV---KRELAAVLLFEPHSHKAGTV---LFSQGDKGTS---WYIIWKGSVNVVT  
H----GKGL-----V-T---T-LHEG-DDFGQLALVNDAPRAATIILGED--  
-----N-CHFLRVDKQDFNRI-IKDVEAKTMRLEEHGKVV-----  
>Rapgef3\_[Bos\_mutus]\_555987327  
AVAHLNSNV---KRELAAVLLFEPHSHKAGTV---LFSQGDKGTS---WYIIWKGSVNVVT  
H----GKGL-----V-T---T-LHEG-DDFGQLALVNDAPRAATIILGED--  
-----N-CHFLRVDKQDFNRI-IKDVEAKTMRLEEHGKVV-----  
>Rapgef3\_[Bos\_taurus]\_528949062  
AVAHLNSNV---KRELAAVLLFEPHSHKAGTV---LFSQGDKGTS---WYIIWKGSVNVVT  
H----GKGL-----V-T---T-LHEG-DDFGQLALVNDAPRAATIILGED--  
-----N-CHFLRVDKQDFNRI-IKDVEAKTMRLEEHGKVV-----  
>Rapgef3\_[Bubalus\_bubalis]\_594071309  
AVAHLNSNV---KRELAAVLLFEPHSHKAGTV---LFSQGDKGTS---WYIIWKGSVNVVT  
H----GKGL-----V-T---T-LHEG-DDFGQLALVNDAPRAATIILGED--  
-----N-CHFLRVDKQDFNRI-IKDVEAKTMRLEEHGKVV-----  
>Rapgef3\_[Callithrix\_jacchus]\_675676227  
AVAHLNSNV---KRELAAVLLFEPHSHKAGTV---LFSQGDKGTS---WYIIWKGSVNVVT  
H----GKGL-----V-T---T-LHEG-DDFGQLALVNDAPRAATIILRED--  
-----N-CHFLRVDKQDFNRI-IKDVEAKTMRLEEHGKVV-----  
>Rapgef3\_[Calypste\_anna]\_663267862  
AVAHLNSNV---KRELASVLMFESHQRAGTV---LFSQGDKGTS---WFIIWKGSVNVVT  
H----GKGL-----V-A---H-LH-X-XXXXXXXLVNDAPRAATIILRED--  
-----N-CHFLRVDKQDFNHI-LKDVEANTVRLKEHGKVV-----  
>Rapgef3\_[Camelus\_bactrianus]\_743736343  
AVAHLNSNV---KRELAAVLLFEPHNKAGTV---LFSQGDKGTS---WYIIWKGSVNVVT

H----GKGL-----V-T---T-LHEG-DDFGQLALVNDAPRAATIILRED--  
-----N-CHFLRVDKQDFNRI-IKDVEAKTMRLEEHGKV-----  
>Rapgef3\_[Camelus\_dromedarius]\_744616231  
AVAHLNSV---KRELA AVL LFEPH SKAGTV---LFSQGDKGTS---WYIIWKGSVNVVT  
H----GKGL-----V-T---T-LHEG-DDFGQLALVNDAPRAATIILRED--  
-----N-CHFLRVDKQDFNRI-IKDVEAKTMRLEEHGKV-----  
>Rapgef3\_[Camelus\_ferus]\_946669809  
AVAHLNSV---KRELA AVL LFEPH SKAGTV---LFSQGDKGTS---WYIIWKGSVNVVT  
H----GKGL-----V-T---T-LHEG-DDFGQLALVNDAPRAATIILRED--  
-----N-CHFLRVDKQDFNRI-IKDVEAKTMRLEEHGKV-----  
>Rapgef3\_[Canis\_lupus\_familiaris]\_153791885  
AVAHLNSV---KRELA AVL LFEPH SKAGTV---LFSQGDKGTS---WYIIWKGSVNVVT  
H----GKGL-----V-T---T-LHEG-DDFGQLALVNDAPRAATIILRED--  
-----N-CHFLRVDKQDFNRI-IKDVEAKTMRLEEHGKV-----  
>Rapgef3\_[Capra\_hircus]\_926691591  
AVAHLNSV---KRELA AVL LFEPH SKAGTV---LFSQGDKGTS---WYIIWKGSVNVVT  
H----GKGL-----V-T---T-LHEG-DDFGQLALVNDAPRAATIILGED--  
-----N-CHFLRVDKQDFNRI-IKDVEAKTMRLEEHGKV-----  
>Rapgef3\_[Carlito\_syrichta]\_640792033  
AVAHLNSV---KRELA AVL LFEPH SKAGTV---LFSQGDKGTS---WYIIWKGSVNVVT  
H----GKGL-----V-T---T-LHEG-DDFGQLALVNDAPRAATIILRED--  
-----N-CHFLRVDKQDFNRI-IKDVEAKTMRLEEHGKV-----  
>Rapgef3\_[Cavia\_porcellus]\_348580717  
AVAHLNSV---KRELA AVL LFEPH SKAGTV---LFSQGDKGTS---WYIIWKGSVNVVT  
H----GKGL-----V-T---T-LHEG-DDFGQLALVNDAPRAATIILRED--  
-----N-CHFLRVDKQDFNRI-IKDVEAKTMRLEEHGKV-----  
>Rapgef3\_[Cebus\_capucinus\_imitator]\_1044333210  
AVAHLNSV---KRELA AVL LFEPH SKAGTV---LFSQGDKGTS---WYIIWKGSVNVVT  
H----GKGL-----V-T---T-LHEG-DDFGQLALVNDAPRAATIILRED--  
-----N-CHFLRVDKQDFNRI-IKDVEAKTMRLEEHGKV-----  
>Rapgef3\_[Ceratotherium\_simum\_simum]\_478509423  
AVAHLNSV---KRELA AVL LFEPH SKAGTV---LFSQGDKGTS---WYIIWKGSVNVVT  
H----GKGL-----V-T---T-LHEG-DDFGQLALVNDAPRAATIILRED--  
-----N-CHFLRVDKQDFNRI-IKDVEAKTMRLEEHGKV-----  
>Rapgef3\_[Cercopithecus\_atys]\_795538404  
AVAHLNSV---KRELA AVL LFEPH SKAGTV---LFSQGDKGTS---WYIIWKGSVNVVT  
H----GKGL-----V-T---T-LHEG-DDFGQLALVNDAPRAATIILRED--  
-----N-CHFLRVDKQDFNRI-IKDVEAKTMRLEEHGKV-----  
>Rapgef3\_[Charadrius\_vociferus]\_699656507  
AVAHLNSV---KRELA AVL MFESHQRAGTVREYLF S QGDKGTS---WYIIWKGSVNVVT  
H----GKGL-----V-A---T-LHEG-DDFGQLALVNDAPRAATIILRED--  
-----N-CHFLRVDKQDFNHI-LKDVEANTMRLKEHGKV-----  
>Rapgef3\_[Chelonia\_mydas]\_465956413  
AVAHLNSV---KRELA AVL LFESH PKAGTV---LFSQGDKGTS---WYIIWKGSVNVVT  
H----GKGL-----V-T---T-LHEG-DDFGQLALVNDAPRAATIILRED--  
-----N-CHFLRVDKRD FNRI-LKDVEANTMRLREHGKV-----  
>Rapgef3\_[Chinchilla\_lanigera]\_533187398  
AVAHLNSV---KRELA AVL LFESH SKAGTV---LFSQGDKGTS---WYIIWKGSVNVVT  
H----GKGL-----V-T---T-LHEG-DDFGQLALVNDAPRAATIILRED--  
-----N-CHFLRVDKQDFNRI-IKDVEAKTMRLEEHGKV-----  
>Rapgef3\_[Chlorocebus\_sabaeus]\_635064864  
AVAHLNSV---KRELA AVL LFEPH SKAGTV---LFSQGDKGTS---WYIIWKGSVNVVT  
H----GKGL-----V-T---T-LHEG-DDFGQLALVNDAPRAATIILRED--  
-----N-CHFLRVDKQDFNRI-IKDVEAKTMRLEEHGKV-----



>Rapgef3\_[Chrysochloris\_asiatica]\_586469584  
AVAHLNSNV---KRELA AVL L FEPH SKAGTV---LFSQGDKGTS---WYIIWKGSVNVVT  
H----GKGL-----V-T---T-LHEG-DDFGQLALVNDAPRAATII LRED--  
-----N-CHFLRV DKQDFNRI-IKDVEAKTMRLEE HGKV V-----  
>Rapgef3\_[Clupea\_harengus]\_831315562  
AAAHLSTSV---RKELAAVLAFESH TKGGTV---LFSQGDKGTS---WYIIWKGSVNVIT  
H----GKGL-----V-T---T-LHEG-EDFGQLALVNDAPRSATIIMRED--  
-----N-CHFLRV DKQDFIRI-LKDVEANTMRLEE HGKAV-----  
>Rapgef3\_[Colobus\_angolensis\_palliatus]\_795136380  
AVAHLNSNV---KRELA AVL L FEPH SKAGTV---LFSQGDKGTS---WYIIWKGSVNVVT  
H----GKGL-----V-T---T-LHEG-DDFGQLALVNDAPRAATII LRED--  
-----N-CHFLRV DKQDFNRI-IKDVEAKTMRLEE HGKV V-----  
>Rapgef3\_[Columba\_livia]\_543750387  
-----V---KRELASVLMFESH PRAGTV---LFSQGDKGTS---WYIIWKGSVNVVT  
H----GKGL-----V-A---T-LHEG-DDFGQLALVNDAPRAATII LRED--  
-----N-CHFLRV DKQDFNRI-LK-----  
>Rapgef3\_[Condylura\_cristata]\_830194828  
AVAHLNSNV---KRELA AVL L FEPH SKAGTV---LFSQGDKGTS---WYIIWKGSVNVVT  
H----GKGL-----V-T---T-LHEG-DDFGQLALVNDAPRAATII LRED--  
-----N-CHFLRV DKQDFNRI-IKDVEAKTMRLEE HGKV V-----  
>Rapgef3\_[Coturnix\_japonica]\_1003995665  
AVAHLNSNV---KRELASVLMFESH QRAGTV---LFSQGDKGTS---WYIIVWKGSVNVVT  
H----GKGL-----V-A---T-LHEG-DDFGXLALVNDAPRAASII LRED--  
-----N-CHFLRV DKQDFNRI-LKDVEANTMRLKEH GKVV-----  
>Rapgef3\_[Cricetulus\_griseus]\_625224024  
AVAHLNSNV---KRELA AVL L FEPH SKAGTV---LFSQGDKGTS---WYIIWKGSVNVVT  
H----GKGL-----V-T---T-LHEG-DDFGQLALVNDAPRAATII LREN--  
-----N-CHFLRV DKQDFNRI-IKDVEAKTMRLEE HGKV V-----  
>Rapgef3\_[Cynoglossus\_semilaevis]\_657766970  
AAAHL SASV---RKELAAVLVFESH AKAGTV---LFSQGDKGTS---WYIIWKGSVNVIT  
H----GKGL-----V-T---T-LHEG-EDFGQLALLNDAPRAATII LRED--  
-----N-CHFLRV DKQDFIRI-LKDVEANTVRLEE HGKTV-----  
>Rapgef3\_[Danio\_rerio]\_688612301  
AVAHLSTSV---RKELASV L VFESH AKAGTV---LFSQGDKGTS---WYIIWRGSVNVIT  
H----GKGL-----V-T---T-LHEG-DDFGQLALVNDAPRAATII LRED--  
-----N-CHFLRV DKQDFIRI-LKDVEANTVRLEE HGKV V-----  
>Rapgef3\_[Dasypus\_novemcinctus]\_488561334  
AVAHLNSNV---KRELA AVL L FEPH SKAGTV---LFSQGDKGTS---WYIIWKGSVNVVT  
H----GKGL-----V-T---T-LHEG-DDFGQLALVNDAPRAATIV LRED--  
-----N-CHFLRGD-----  
>Rapgef3\_[Dipodomys\_ordii]\_852756250  
AVAHLNSNV---KRELA AVL L FEPH SKAGTV---LFSQGDKGTS---WYIIWKGSVNVVT  
H----GKGL-----V-T---T-LHEG-DDFGQLALVNDAPRAATII LRED--  
-----N-CHFLRV DKQDFNRI-IKDVEAKTMRLEE HGKV V-----  
>Rapgef3\_[Echinops\_telfairi]\_850308220  
AVAHLNSNV---KRELA AVL L FEPH SKAGTV---LFSQGDKGTS---WYIIWKGSVNVVT  
H----GKGL-----V-T---T-LHEG-DDFGQLALVNDAPRAATII LGED--  
-----N-CHFLRV DKHDFNRI-IKDVEAKTMRLEE HG RVV-----  
>Rapgef3\_[Egretta\_garzetta]\_697847879  
AVAHLNSNV---KRELASVLMFESH QRAGTV---LFSQGDKGTS---WYIIWKGSVNVVT  
H----GKGL-----V-A---T-LHEG-----  
-----  
>Rapgef3\_[Elephantulus\_edwardii]\_585667536  
AVAHLNSNV---KRELA AVL L FEPH SKAGTV---LFSQGDKGTS---WYIIWKGSVNVVT

H----GKGL-----V-T---T-LHEG-DDFGQLALVNDAPRAATIILRED--  
-----N-CHFLRVDKQDFNRI-IKDVEAKTMRLEEHGKV-----  
>Rapgef3\_[Eptesicus\_fuscus]\_641700539  
AVAHLNSV---KRELA AVL LFEPH SKAGTV---LFSQGDKGTS---WYIIWKGSVNVVT  
H----GKGL-----V-T---T-LHEG-DDFGQLALVNDAPRAATIVLRED--  
-----N-CHFLRVDKQDFNRI-IKDVEAKTMRLEEHGKV-----  
>Rapgef3\_[Equus\_asinus]\_958727868  
ALAHLSNSV---KRELA AVL LFEPH SKAGTV---LFSQGDKGTS---WYIIWKGSVNVVT  
H----GKGL-----V-T---T-LHEG-DDFGQLALVNDAPRAATIILRED--  
-----N-CHFLRVDKQDFNRI-IKDVEAKTMRLEEHGKV-----  
>Rapgef3\_[Equus\_caballus]\_545219817  
AVAHLNSV---KRELA AVL LFEPH SKAGTV---LFSQGDKGTS---WYIIWKGSVNVVT  
H----GKGL-----V-T---T-LHEG-DDFGQLALVNDAPRAATIILRED--  
-----N-CHFLRVDKQDFNRI-IKDVEAKTMRLEEHGKV-----  
>Rapgef3\_[Equus\_przewalskii]\_664709775  
AVAHLNSV---KRELA AVL LFEPH SKAGTV---LFSQGDKGTS---WYIIWKGSVNVVT  
H----GKGL-----V-T---T-LHEG-DDFGQLALVNDAPRAATIILRED--  
-----N-CHFLRVDKQDFNRI-IKDVEAKTMRLEEHGKV-----  
>Rapgef3\_[Erinaceus\_europaeus]\_1016600502  
AVAHLNSV---KRELA AVL LFEPH SKAGTV---LFSQGDKGTS---WYIIWKGSVNVVT  
H----GKGL-----V-T---T-LHEG-DDFGQLALVNDAPRAATIILRED--  
-----N-CHFLRVDKQDFNRI-IKDVEAKTMRLEEHGKV-----  
>Rapgef3\_[Esox\_lucius]\_742184366  
AVAHLSTSV---RKELAAVLVFESHAKAGTV---LFSQGDKGTS---WYIIWKGSVNVIT  
H----GKGL-----V-T---T-LHEG-EDFGQLALVNDAPRAATIILRED--  
-----N-CHFLRVDKQDFIRI-LKDVEANTVRLEEHGKAV-----  
>Rapgef3\_[Falco\_cherrug]\_929429028  
AVAHLNSV---KRELA SVLMFESHQRAGTV---LFSQGDKGTS---WYIIWKGSVNVVT  
H----GKGL-----V-A---T-LHEG-DDFGQLALVNDAPRAATIILRED--  
-----N-CHFLRVDKQDFNHI-LKDVEANTMRLEEHGKV-----  
>Rapgef3\_[Felis\_catus]\_410964201  
AVAHLNSV---KRELA AVL LFEPH SRAGTV---LFSQGDKGTS---WYIIWKGSVNVVT  
H----GKGL-----V-T---T-LHEG-DDFGQLALVNDAPRAATIILRED--  
-----N-CHFLRVDKQDFNRI-IKDVEAKTMRLEEHGKV-----  
>Rapgef3\_[Ficedula\_albicollis]\_1020933356  
AVAHLNSV---KRELA AVL MFEHQ RAGTV---LFSQGDKGTS---WYIIWKGSVNVVT  
H----GKGL-----V-A---T-LHEG-DDFGQLALVNDAPRAATILLRED--  
-----N-CHFLRVDKHDFNRI-LKDVEANTVRLKEHGKV-----  
>Rapgef3\_[Fukomys\_damarensis]\_731247212  
AVAHLNSV---KRELA AVL VFEPH SKAGTV---LFSQGDKGTS---WYIIWKGSVNVVT  
H----GKGL-----V-T---T-LHEG-DDFGQLALVNDAPRAATIILRED--  
-----N-CHFLRVDKQDFNRI-IKDVEAKTMRLEEHGKV-----  
>Rapgef3\_[Fundulus\_heteroclitus]\_831559266  
AAHLSSSV---RKELAAVLVFESHVKS GTV---LFSQGDKGTS---WYIIWKGSVNVIT  
H----GKGI-----V-T---T-LHEG-EDFGQLALLNDAPRAATIILRED--  
-----N-CHFLRVDKQDFIRI-LKDVEANTVRLEEHGRTV-----  
>Rapgef3\_[Galeopterus\_variegatus]\_667289153  
AVAHLNSV---KRELA AVL LFEPH SKAGTV---LFSQGDKGTS---WYIIWKGSVNVVT  
H----GKGL-----V-T---T-LHEG-DDFGQLALVNDAPRAATIVLRED--  
-----N-CHFLRVDKQDFNRI-IKDVEAKTMRLEEHGKV-----  
>Rapgef3\_[Geospiza\_fortis]\_930243948  
-----V---KRELA AVL MFEHQ RAGTV---LFSQGDKGTS---WYIIWKGSVNVVT  
H----GKGL-----V-A---T-LHEG-DDFGQLALVNDAPRAATILLRED--  
-----N-CHFLRVDKQDFNRI-LKDVEANTVRLKEHGKV-----

>Rapgef3\_[Gorilla\_gorilla\_gorilla]\_426372291  
AVAHLNSNV---KRELA AVL L FEPH SKAGTV---LFSQGDKGTS---WYIIWKGSVNVVT  
H----GKGL-----V-T---T-LHEG-DDFGQLALVNDAPRAATIIILRED--  
-----N-CHFLRV DKQDFNRI-IKDVEAKTMRLEE HGKV V-----  
>Rapgef3\_[Haliaeetus\_leucocephalus]\_729737483  
AVAHLNSNV---KRELASV L MFESHQRAGTV---LFSQGDKGTS---WYIIWKGSVNVVT  
H----GKGL-----V-A---T-LHEG-DDFGQLALVNDAPRAATIIILRED--  
-----N-CHFLRV DKQDFNHI-LKDVEANTMR LKEHGKV V-----  
>Rapgef3\_[Heterocephalus\_glaber]\_351710665  
AVAHLNSNV---KRELA AVL L FEPH SKAGTV---LFSQGDKGTS---WYIIWKGSVNVVT  
H----GKGL-----V-T---T-LHEG-DDFGQLALVNDAPRAATIIILRED--  
-----N-CHFLRV DKQDFNRI-IKDVEAKTMRLEE HGKV V-----  
>Rapgef3\_[Homo\_sapiens]\_1034577577  
AVAHLNSNV---KRELA AVL L FEPH SKAGTV---LFSQGDKGTS---WYIIWKGSVNVVT  
H----GKGL-----V-T---T-LHEG-DDFGQLALVNDAPRAATIIILRED--  
-----N-CHFLRV DKQDFNRI-IKDVEAKTMRLEE HGKV V-----  
>Rapgef3\_[Ictidomys\_tridecemlineatus]\_914907256  
AVAHLNSNV---KRELA AVL L FEPH SKAGTV---LFSQGDKGTS---WYIIWKGSVNVVT  
H----GKGL-----V-T---T-LHEG-DDFGQLALVNDAPRAATIIILRED--  
-----N-CHFLRV DKQDFNRI-VKDVEAKTMRLEE HGKV V-----  
>Rapgef3\_[Jaculus\_jaculus]\_507569974  
AVAHLNSNV---KRELA AVL L FEPH SKAGTV---LFSQGDKGTS---WYIIWKGSVNVVT  
H----GKGL-----V-T---T-LHEG-DDFGQLALVNDAPRAATIIILRED--  
-----N-CHFLRV DKQDFNRI-IKDVEAKTMRLEE HGKV V-----  
>Rapgef3\_[Kryptolebias\_marmoratus]\_1041103289  
AAAHLS SSV---RKELAAV L VFESH TKAGTV---LFSQGDKGTS---WYIIWKGSVNVIT  
H----GKGL-----V-T---T-LHEG-EDFGQLALLNDAPRAATIIILRED--  
-----N-CHFLRV DKQDFIRI-LKDVEANTVRLEE HGKV T-----  
>Rapgef3\_[Latimeria\_chalumnae]\_557028580  
AVAHLNSNV---KRELASV L EFESHAKAETV---LFSQGDKGTS---WYIIWKGSVNVLT  
H----GKGL-----V-T---T-LSEG-DDFGQLALVNDAPRSATIIILRED--  
-----N-CHFLRV HKQDFIRI-LKDVEAKTIR LKEHGKV V-----  
>Rapgef3\_[Lepisosteus\_oculatus]\_972964891  
AVAHL SSV---RRELAAV L VFESHAKAGTL---LFSQGDKGTS---WYIIWKGSVNVIT  
H----GKGL-----V-T---T-LHEG-DDFGQLALLNDAPRAATIIILRED--  
-----N-CHFLRV DKQDFIHI-LKDVEANTVRLEE HGKV V-----  
>Rapgef3\_[Leptonychotes\_weddellii]\_585154006  
AVAHLNSNV---KRELA AVL L FEPH SKAGTV---LFSQGDKGTS---WYIIWKGSVNVVT  
H----GKGL-----V-T---T-LHEG-DDFGQLALVNDAPRAATIIILRED--  
-----N-CHFLRV DKQDFNRI-IKDVEAKTMRLEE HGKV V-----  
>Rapgef3\_[Lipotes\_vexillifer]\_602707263  
AVAHLNSNV---KRELA AVL L FEPH SKAGTV---LFSQGDKGTS---WYIIWKGSVNVVT  
H----GKGL-----V-T---T-VHEG-DDFGQLALVNDAPRAATIIILRED--  
-----N-CHFLRV DKQDFNRI-IKDVEAKTMRLEE HGKV V-----  
>Rapgef3\_[Loxodonta\_africana]\_731457673  
ARGHLFNSV---KRELA AVL L FEPH CKAGTV---LFSQGDKGTS---WYIIWKGSVNVVT  
H----GKCV-----D-H---W-VW-----  
-----LV-LQDVEAKTMRLEE HGKV V-----  
>Rapgef3\_[Macaca\_fascicularis]\_544469453  
AVAHLNSNV---KRELA AVL L FEPH SKAGTV---LFSQGDKGTS---WYIIWKGSVNVVT  
H----GKGL-----V-T---T-LHEG-DDFGQLALVNDAPRAATIIILRED--  
-----N-CHFLRV DKQDFNRI-IKDVEAKTMRLEE HGKV V-----  
>Rapgef3\_[Macaca\_mulatta]\_966971988  
AVAHLNSNV---KRELA AVL L FEPH SKAGTV---LFSQGDKGTS---WYIIWKGSVNVVT

H----GKGL-----V-T---T-LHEG-DDFGQLALVNDAPRAATIILRED--  
-----N-CHFLRVDKQDFNRI-IKDVEAKTMRLEEHGKVV-----  
>Rapgef3\_[Macaca\_nemestrina]\_795561749  
AVAHLNSV---KRELA AVL LFEPH SKAGTV---LFSQGDKGTS---WYIIWKGSVNVVT  
H----GKGL-----V-T---T-LHEG-DDFGQLALVNDAPRAATIILRED--  
-----N-CHFLRVDKQDFNRI-IKDVEAKTMRLEEHGKVV-----  
>Rapgef3\_[Mandrillus\_leucophaeus]\_795173394  
AVAHLNSV---KRELA AVL LFEPH SKAGTV---LFSQGDKGTS---WYIIWKGSVNVVT  
H----GKGL-----V-T---T-LHEG-DDFGQLALVNDAPRAATIILRED--  
-----N-CHFLRVDKQDFNRI-IKDVEAKTMRLEEHGKVV-----  
>Rapgef3\_[Marmota\_marmota\_marmota]\_984114363  
AVAHLNSV---KRELA AVL LFEPH SKAGTV---LFSQGDKGTS---WYIIWKGSVNVVT  
H----GKGL-----V-T---T-LHEG-DDFGQLALVNDAPRAATIILRED--  
-----N-CHFLRVDKQDFNRI-VKDVEAKTMRLEEHGKVV-----  
>Rapgef3\_[Maylandia\_zebra]\_499019354  
AAAHLSVV---RKELAAVLVFESHAKAGTV---LFSQGDKGTS---WYIIWKGSVNVIT  
H----GKGL-----V-T---T-LHEG-EDFGQLALLNEQPRAATIILRED--  
-----N-CHFLRVDKQDFIRI-LKDVEANTVRLEEHGKTV-----  
>Rapgef3\_[Mesitornis\_unicolor]\_704529374  
AVAHLNSV---KRELASVLMFEPHQRVGTV---LFSQGDKGTS---WYIIWKGSVNVVT  
H----GKGL-----V-A---T-LHEG-DDFGQLALVNDAPRAATIILRED--  
-----N-CHFLRVDKQDFNRI-LKDVEANTMRLKEHGKVV-----  
>Rapgef3\_[Mesocricetus\_auratus]\_880869538  
AVAHLNSV---KRELA AVL LFEPH SKAGTV---LFSQGDKGTS---WYIIWKGSVNVVT  
H----GKGL-----V-T---T-LHEG-DDFGQLALVNDAPRAATIILREN--  
-----N-CHFLRVDKQDFNRI-IKDVEAKTMRLEEHGKVV-----  
>Rapgef3\_[Miniopterus\_natalensis]\_1016658187  
AVAHLNSV---KRELA AVL LFEPH SKAGTV---LFSQGDKGTS---WYIIWKGSVNVVT  
H----GKGL-----V-T---T-LHEG-DDFGQLALVNDAPRAATIILRED--  
-----N-CHFLRVDKQDFNRI-IKDVEAKTIRLEEHGKVV-----  
>Rapgef3\_[Mus\_musculus]\_755551528  
AVAHLNSV---KRELA AVL LFEPH SKAGTV---LFSQGDKGTS---WYIIWKGSVNVVT  
H----GKGL-----V-T---T-LHEG-DDFGQLALVNDAPRAATIILREN--  
-----N-CHFLRVDKQDFNRI-IKDVEAKTMRLEEHGKVV-----  
>Rapgef3\_[Mustela\_putorius\_furo]\_511891954  
AVAHLNSV---KRELA AVL LFEPH SKAGTV---LFSQGDKGTS---WYIIWKGSVNVVT  
H----GKGL-----V-T---T-LHEG-DDFGQLALVNDAPRAATIILRED--  
-----N-CHFLRVDKQDFNRI-IKDVEAKTMRLEEHGKVV-----  
>Rapgef3\_[Myotis\_brandtii]\_521032880  
AVAHLNSV---KRELA AVL LFEPH SKAGTV---LFSQGDKGTS---WYIIWKGSVNVVT  
H----GKGL-----V-T---T-LHEG-DDFGQLALVNDAPRAATIILRED--  
-----N-CHFLRVDKQDFNRI-IKDVEAKTMRLEEHGKVV-----  
>Rapgef3\_[Myotis\_davidii]\_432114532  
AVAHLNSV---KRELA AVL LFEPH SKAGTV---LFSQGDKGTS---WYIIWKGSVNVVT  
H----GKGL-----V-T---T-LHEG-DDFGQLALVNDAPRAATIILRED--  
-----N-CHFLRVDKQDFNRI-IKDVEAKTMRLEEHGKVV-----  
>Rapgef3\_[Myotis\_lucifugus]\_940740350  
AVAHLNSV---KRELA AVL LFEPH SKAGTV---LFSQGDKGTS---WYIIWKGSVNVVT  
H----GKGL-----V-T---T-LHEG-DDFGQLALVNDAPRAATIILRED--  
-----N-CHFLRVDKQDFNRI-IKDVEAKTMRLEEHGKVV-----  
>Rapgef3\_[Neolamprologus\_brichardi]\_583998066  
AAAHLSVV---RKELAAVLVFESHAKAGTV---LFSQGDKGTS---WYIIWKGSVNVIT  
H----GKGL-----V-T---T-LHEG-EDFGQLALLNEQPRAATIILRED--  
-----N-CHFLRVDKQDFIRI-LKDVEANTVRLEEHGKTV-----

>Rapgef3\_[*Nomascus leucogenys*]<sub>820994222</sub>  
 AVAHLNSNV---KRELAAVLQFEPHSHKAGTV---LFSQGDKGTS---WYIIWKGSVNVVT  
 H----GKGL-----V-T---T-LHEG-DDFGQLALVNDAPRAATIIILRED--  
 -----N-CHFLRVDKQDFNRI-IKDVEAKTMRLEEKGKVV-----  
 >Rapgef3\_[*Nothobranchius furzeri*]<sub>1007768327</sub>  
 AAAHLSSSV---RKELAAVLVFESHSHKAGTV---LFSQGDKGTS---WYIIWKGSVNVIT  
 H----GKGL-----V-T---T-LHEG-EDFGQLALLNDAPRAATIIILRED--  
 -----N-CHFLRVDKQDFIRI-LKDVEANTVRLEEKGKTV-----  
 >Rapgef3\_[*Ochotona princeps*]<sub>504177543</sub>  
 AVAHLNSNV---KRELAAVLLFEPHSHKAGTV---LFSQGDKGTS---WYIIWKGSVNVVT  
 H----GKGL-----V-T---T-LHEG-DDFGQLALVNDAPRAATIIILRED--  
 -----S-CHFLRVDKQDFNRI-IKDVEAKTMRLEEKGKVV-----  
 >Rapgef3\_[*Octodon degus*]<sub>507675869</sub>  
 AVAHLNSNV---KRELASVLLFEPHSHKAGTV---LFSQGDKGTS---WYIIWKGSVNVVT  
 H----GKGL-----V-T---T-LHEG-DDFGQLALMNDAPRAATIIILRED--  
 -----N-CHFLRVDKQDFNRI-IKDVEARTMRLEEKGKVV-----  
 >Rapgef3\_[*Odobenus rosmarus divergens*]<sub>823398556</sub>  
 AVAHLNSNV---KRELAAVLLFEPHSHKAGTV---LFSQGDKGTS---WYIIWKGSVNVVT  
 H----GKGL-----V-T---T-LHEG-DDFGQLALVNDAPRAATIIILRED--  
 -----N-CHFLRVDKQDFNRI-IKDVEAKTMRLEEKGKVV-----  
 >Rapgef3\_[*Opisthocomus hoazin*]<sub>700398843</sub>  
 G--HLLPQV---KQELASVLMFESHQRAGTV---LFSQGDKGTS---WYIIWKGSVNVVT  
 H----GKGL-----V-A---T-LHEG-DDFGQLALVNDAPRAATIIILRED--  
 -----N-CHFLRVDKQDFNRI-LKDVEANTMRLKEHKGKVV-----  
 >Rapgef3\_[*Orcinus orca*]<sub>466031722</sub>  
 AVAHLNSNV---KRELAAVLLFEPHSHKAGTV---LFSQGDKGTS---WYIIWKGSVNVVT  
 H----GKGL-----V-T---T-VHEG-DDFGQLALVNDAPRAATIIILRED--  
 -----N-CHFLRVDKQDFNRI-IKDVEAKTMRLEEKGKVV-----  
 >Rapgef3\_[*Oreochromis niloticus*]<sub>542216386</sub>  
 AAAHLSSSV---RKELAAVLVFESHAKAGTV---LFSQGDKGTS---WYIIWKGSVNVIT  
 H----GKGL-----V-T---T-LHEG-EDFGQLALLNEQPRAATIIILRED--  
 -----N-CHFLRVDKQDFIRI-LKDVEANTVRLEEKGKTV-----  
 >Rapgef3\_[*Orycteropus afer afer*]<sub>634839964</sub>  
 AVAHLNSNV---KRELAAVLQFEPHSHKAGTV---LFSQGDKGTS---WYIIWKGSVNVVT  
 H----GKGL-----V-T---T-LHEG-DDFGQLALVNDAPRAATIIILRED--  
 -----N-CHFLRVDKQDFNRI-IKDVEAKTMRLEEKGKVV-----  
 >Rapgef3\_[*Oryctolagus cuniculus*]<sub>1040227932</sub>  
 AVAHLNSNV---KRELAAVLLXEPHSHKAGTV---LFSQGDKGTS---WYIIWKGSVNVVT  
 H----GKGL-----V-T---T-LHEG-DDFGQLALVNDAPRAATIVLRED--  
 -----S-CHFLRVDKQDFNRI-IKDVEAKTMRLEEKGKVV-----  
 >Rapgef3\_[*Oryzias latipes*]<sub>765126149</sub>  
 AAAHLSTSV---RKELAAVLVFESHAKAGTV---LFSQGDKGTS---WYIIWKGSVNVIT  
 H----GKGI-----V-T---T-LHEG-EDFGQLALLNDAPRAATIIILRED--  
 -----N-CHFLRVDKQDFIRI-LKDVEANTVRLEEKGKTV-----  
 >Rapgef3\_[*Otolemur garnettii*]<sub>831232292</sub>  
 AVAHLNSNV---KRELAAVLLFEPHSHKAGTV---LFSQGDKGTS---WYIIWKGSVNVVT  
 H----GKGL-----V-T---T-LHEG-DDFGQLALVNDAPRAATIIILRED--  
 -----N-CHFLRVDKQDFNRI-IKDVEAKTIRLEEKGKVV-----  
 >Rapgef3\_[*Ovis aries musimon*]<sub>803304001</sub>  
 AVAHLNSNV---KRELAAVLLFEPHSHKAGTV---LFSQGDKGTS---WYIIWKGSVNVVT  
 H----GKGL-----V-T---T-LHEG-DDFGQLALVNDAPRAATIIILGED--  
 -----N-CHFLRVDKQDFNRI-IKDVEAKTMRLEEKGKVV-----  
 >Rapgef3\_[*Ovis aries*]<sub>803044458</sub>  
 AVAHLNSNV---KRELAAVLLFEPHSHKAGTV---LFSQGDKGTS---WYIIWKGSVNVVT

H----GKGL-----V-T---T-LHEG-DDFGQLALVNDAPRAATIILGED--  
-----N-CHFLRVDKQDFNRI-IKDVEAKTMRLEEHGKV-----  
>Rapgef3\_[Pan\_paniscus]\_675783058  
AVAHLNSV---KRELAAVLLFEPHSGAGTV---LFSQGDGTS---WYIIWKGSVNVVT  
H----GKGL-----V-T---T-LHEG-DDFGQLALVNDAPRAATIILRED--  
-----N-CHFLRVDKQDFNRI-IKDVEAKTMRLEEHGKV-----  
>Rapgef3\_[Pan\_troglodytes]\_1034096396  
AVAHLNSV---KRELAAVLLFEPHSGAGTV---LFSQGDGTS---WYIIWKGSVNVVT  
H----GKGL-----V-T---T-LHEG-DDFGQLALVNDAPRAATIILRED--  
-----N-CHFLRVDKQDFNRI-IKDVEAKTMRLEEHGKV-----  
>Rapgef3\_[Panthera\_tigris\_altaica]\_591291251  
AVAHLNSV---KRELAAVLLFEPHSGAGTV---LFSQGDGTS---WYIIWKGSVNVVT  
H----GKGL-----V-T---T-LHEG-DDFGQLALVNDAPRAATIILRED--  
-----N-CHFLRVDKQDFNRI-IKDVEAKTMRLEEHGKV-----  
>Rapgef3\_[Pantholops\_hodgsonii]\_556771829  
AVAHLNSV---KRELAAVLLFEPHSGAGTV---LFSQGDGTS---WYIIWKGSVNVVT  
H----GKGL-----V-T---T-LHEG-DDFGQLALVNDAPRAATIILGED--  
-----N-CHFLRVDKQDFNRI-IKDVEAKTMRLEEHGKV-----  
>Rapgef3\_[Papio\_anubis]\_402885758  
AVAHLNSV---KRELAAVLLFEPHSGAGTV---LFSQGDGTS---WYIIWKGSVNVVT  
H----GKGL-----V-T---T-LHEG-DDFGQLALVNDAPRAATIILRED--  
-----N-CHFLRVDKQDFNRI-IKDVEAKTMRLEEHGKV-----  
>Rapgef3\_[Parus\_major]\_998744296  
-----  
-----HEG-DDFGQLALVNDAPRAATIILRED--  
-----N-CHFLRVDKQDFNRI-LKDVEANTVRLEEHGKV-----  
>Rapgef3\_[Peromyscus\_maniculatus\_bairdii]\_589923021  
AVAHLNSV---KRELAAVLLFEPHSGAGTV---LFSQGDGTS---WYIIWKGSVNVVT  
H----GKGL-----V-T---T-LHEG-DDFGQLALVNDAPRAATIILREN--  
-----N-CHFLRVDKQDFNRI-IKDVEAKTMRLEEHGKV-----  
>Rapgef3\_[Physeter\_catodon]\_593715976  
AVAHLNSV---KRELAAVLLFEPHSGAGTV---LFSQGDGTS---WYIIWKGSVNVVT  
H----GKGL-----V-T---T-LHEG-DDFGQLALVNDAPRAATIILRED--  
-----N-CHFLRVDKQDFNRI-IKDVEAKTMRLEEHGKV-----  
>Rapgef3\_[Poecilia\_formosa]\_617405404  
AAAHLSV---RKELAAVLVFESHVKSAGTV---LFSQGDGTS---WYIIWKGSVNVIT  
H----GKGI-----V-T---T-LHEG-EDFGQLALLNDAPRAATIILRED--  
-----N-CHFLRVDKHFIRI-LKDVEANTVRLEEHGKTV-----  
>Rapgef3\_[Poecilia\_latipinna]\_961891079  
AAAHLSV---RKELAAVLVFESHVKSAGTV---LFSQGDGTS---WYIIWKGSVNVIT  
H----GKGI-----V-T---T-LHEG-EDFGQLALLNDAPRAATIILRED--  
-----N-CHFLRVDKHFIRI-LKDVEANTVRLEEHGKTV-----  
>Rapgef3\_[Poecilia\_reticulata]\_658859927  
AAAHLSV---RKELAAVLVFESHVKSAGTV---LFSQGDGTS---WYIIWKGSVNVIT  
H----GKGI-----V-T---T-LHEG-EDFGQLALLNDAPRAATIILRED--  
-----N-CHFLRVDKQDFIRI-LKDVEANTVRLEEHGKTV-----  
>Rapgef3\_[Pongo\_abelii]\_197099402  
AVAHLNSV---KRELAAVLLFEPHSGAGTV-----  
-----  
-----  
>Rapgef3\_[Propithecus\_coquereli]\_826277148  
AVAHLNSV---KRELAAVLLFEPHSGAGTV---LFSQGDGTS---WYIIWKGSVNVVT  
H----GKGL-----V-T---T-LHEG-DDFGQLALVNDAPRAATIILRED--  
-----N-CHFLRVDKQDFNRI-IKDVEAKTMRLEEHGKV-----

>Rapgef3\_[Protobothrops\_mucrosquamatus]\_1002588985  
AVAHLSSSV---RRELA AVL LFESHAKAGTV---LFSQGDKGTS---WYIIWKGSINVVT  
H----DKGL-----V-C---T-LHEG-DDFGQLALVNDAPRAATIIILRED--  
-----S-CHFLRVDKRDFNRI-LKDVEANTLRLKEHGKVV-----  
>Rapgef3\_[Pseudopodoces\_humilis]\_929508811  
AVAHLSNSV---KRELA AVL MFEGHQ RAGTV---LFSQGDKGTS---WYIIWKGSVNVVT  
H----GKGL-----V-A---T-LHEG-DDFGQLALVNDAPRAATIIILRED--  
-----N-CHFLRVDKQDFNRI-LKDVEANTVRLKEHGKVV-----  
>Rapgef3\_[Pteropus\_allecto]\_989976416  
AVAHLSNSV---KRELA AVL LFEPH SKAGTV---LFSQGDKGTS---WYIVWKGSVNVVT  
H----GKGL-----V-T---T-LHEG-DDFGQLALVNDAPRAATIVLRED--  
-----N-CHFLRVDKQDFNRI-IKDVEAKTMRLEEHGKVV-----  
>Rapgef3\_[Pteropus\_vampyrus]\_759143390  
AVAHLSNSV---KRELA AVL LFEPH SKAGTV---LFSQGDKGTS---WYIVWKGSVNVVT  
H----GKGL-----V-T---T-LHEG-DDFGQLALVNDAPRAATIVLRED--  
-----N-CHFLRVDKQDFNRI-IKDVEAKTMRLEEHGKVV-----  
>Rapgef3\_[Pundamilia\_nyererei]\_548483158  
AAAHLS SV---RKELAAVL VFESHAKAGTV---LFSQGDKGTS---WYIIWKGSVNVIT  
H----GKGL-----V-T---T-LHEG-EDFGQLALLNEQPRAATIIILRED--  
-----N-CHFLRVDKQDFIRI-LKDVEANTVRLKEEHGKTV-----  
>Rapgef3\_[Python\_bivittatus]\_602664072  
AVAHLSSSV---KRELA AVL LFESHAKAGTV---LFSQGDKGTS---WYIIWKGSVNVVT  
H----DKGL-----V-S---T-LHEG-DDFGQLALVNDAPRAATIIILRED--  
-----S-CHFLRVDKRDFNRI-LKDVEANTLRLKEHGKVV-----  
>Rapgef3\_[Rhinopithecus\_roxellana]\_724952752  
AVAHLSNSV---KRELA AVL LFEPH SKAGTV---LFSQGDKGTS---WYIIWKGSVNVVT  
H----GKGL-----V-T---T-LHEG-DDFGQLALVNDAPRAATIIILRED--  
-----N-CHFLRVDKQDFNRI-IKDVEAKTMRLEEHGKVV-----  
>Rapgef3\_[Rousettus\_aegyptiacus]\_1012262855  
AVAHLSNSV---KRELA AVL LFEPH SKAGTV---LFSQGDKGTS---WYIIWKGSVNVVT  
H----GKGL-----V-T---T-LHEG-DDFGQLALVNDAPRAATIVLRED--  
-----N-CHFLRVDKQDFNRI-IKDVEAKTMRLEEHGKVV-----  
>Rapgef3\_[Saimiri\_boliviensis\_boliviensis]\_403301658  
AVAHLSNSV---KRELA AVL LFEPH SKAGTV---LFSQGDKGTS---WYIIWKGSVNVVT  
H----GKGL-----V-T---T-LHEG-DDFGQLALVNDAPRAATIIILRED--  
-----N-CHFLRVDKQDFNRI-IKDVEAKTMRLEEHGKVV-----  
>Rapgef3\_[Salmo\_salar]\_929230181  
AAAHLS TSV---RKELAAVL MFESHAKAGTV---LFSQGDKGTS---WYIIWKGSVNVIT  
H----GKGL-----V-T---T-LHEG-EDFGQLALVNDAPRAATIIILRED--  
-----N-CHFLRVDKQDFIRI-LKDVEANTMRLEEHGKAV-----  
>Rapgef3\_[Sarcophilus\_harrisii]\_821489513  
AVAHLSNSV---KRELA AVL LFEPSSKAGTV---LFSQGDKGTS---WYIIWKGSVNVVT  
H----GKGL-----V-T---T-LHEG-DDFGQLALVNDSPRAATIIILRED--  
-----N-CQFLRVDKQDFNRI-IKDVEANTMRLEEHGKVV-----  
>Rapgef3\_[Sclerophages\_formosus]\_938064599  
AVAHLSSSV---RKELAAVL VFESHAKAGTV---LFSQGDKGTS---WYIIWKGSVNVVT  
H----GKGL-----V-T---T-LHEG-DDFGQLALVNDAPRAATIIILRED--  
-----N-CHFLRVDKQDFIHI-LKDVEANTVRLKEEHGRVV-----  
>Rapgef3\_[Sinocyclocheilus\_anshuiensis]\_1025002748  
AVAHLSTSV---RKELAAVL VFESHAKAGTV---LFSQGDKGTS---WYIIWRGSVNVIT  
H----GKGL-----V-T---T-LHEG-EDFGQLALVNDAPRSATIIILRED--  
-----N-CHFLRVDKQDFIRI-LKDVEANTVRLKEEHGKVV-----  
>Rapgef3\_[Sinocyclocheilus\_grahami]\_1020398505  
AVAHLSTSV---RKELAAVL VFESHAKAGTV---LFSQGDKGTS---WYIIWRGSINVIT

H----GKGL-----V-T---T-LHEG-DDFGQLALVNDAPRSATIILRED--  
-----N-CHFLRVDKQDFIRI-LKDVEANTVRLEEKGQVV-----  
>Rapgef3\_[Sinocyclocheilus\_rhinocerosus]\_1025325482  
AVAHLSTSV---RKELAAVLVFESHAKAGTV---LFSQGDKGTS---WYIIWKGSVNVIT  
H----GKGL-----V-T---T-LHEG-EDFGQLALVNDAPRSATIILRED--  
-----N-CHFLRVDKQDFIRI-LKDVEANTVRLEEKGQVV-----  
>Rapgef3\_[Sorex\_araneus]\_836708039  
AVAHLSNSV---KRELAAVLLFEPHSHKAGTV---LFSQGDKGTS---WYIIWKGSVNVVT  
H----GKGL-----V-T---T-LHEG-EDFGQLALVNDAPRAATIILRED--  
-----N-CHFLRVDKQDFNRI-IKDVEAKTMRLEEKGQVV-----  
>Rapgef3\_[Struthio\_camelus\_australis]\_678214569  
AVAHLSNSV---KRELASVMMFESHQRAGTV---LFSQGDKGTS---WYIIWKGSVNVVT  
H----GKGL-----V-A---T-LHEG-DDFGQLALVNDAPRAATIILRED--  
-----N-CHFLRVDKQDFNRI-LKDVEANTMRLEKEHGQVV-----  
>Rapgef3\_[Sus\_scrofa]\_545893683  
-----ELDLVLLFEPHSHKAGTV---LFSQGDKGTS---WYIIWKGSVNVVT  
H----GKGL-----V-T---T-LHEG-DDFGQLXXXXXXXXXXXXXXXXXED--  
-----N-CHFLRVDKQDFNRI-IKDVEAKTMRLEEKGQVV-----  
>Rapgef3\_[Takifugu\_rubripes]\_768914882  
AAAHLSTSV---RKELAAVLVFESHAKAGTV---LFSQGDKGTS---WYIIWKGSVNVIT  
H----GKGL-----V-T---T-LHEG-EDFGQLALLNDAPRAATIILRED--  
-----N-CHFLRVDKQDFIRI-LKDVEANTVRLEEKGQTV-----  
>Rapgef3\_[Thamnophis\_sirtalis]\_927194898  
AVAHLSSSV---RRELAAVLLFESHAKAGTV---LFSQGDKGTS---WYIIWKGSVNVVT  
H----DKGL-----V-C---T-LHEG-DDFGQLALVNDAPRAATIILRED--  
-----S-CHFLRVDKRDNRI-LKDVEANTLRLKEHGQVV-----  
>Rapgef3\_[Tinamus\_guttatus]\_719772822  
AVAHLSNSV---KRELAAVLMFESHPRAGTV---LFSQGDKGTS---WYIIWKGSVNVVT  
H----GKGL-----V-A---T-LHEG-DDFGQLALVNDAPRAATIILRED--  
-----N-CHFLRVDKQDFNRI-LKDVEANTVRLKEHGQVV-----  
>Rapgef3\_[Trichechus\_manatus\_latirostris]\_823404739  
AVAHLSNSV---KRELAAVLLFEPHSHKAGTV---LFSQGDKGTS---WYIIWKGSVNVVT  
H----GKGL-----V-T---T-LHEG-DDFGQLALVNDAPRAATIILRED--  
-----N-CHFLRVDKQDFNRI-IKDVEAKTMRLEEKGQVV-----  
>Rapgef3\_[Tupaia\_chinensis]\_562882145  
AVAHLSNSV---KRELAAVLLFEPHSHKAGTV---LFSQGDKGTS---WYIIWKGSVNVVT  
H----GKGL-----V-T---T-LHEG-DDFGQLALVNDAPRAATIILRED--  
-----N-CHFLRVDKQDFNRI-IKDVEAKTMRLEEKGQVV-----  
>Rapgef3\_[Tursiops\_truncatus]\_470596594  
AVAHLSNSV---KRELAAVLLFEPHSHKAGTV---LFSQGDKGTS---WYIIWKGSVNVVT  
H----GKGL-----V-T---T-VHEG-DDFGQLALVNDAPRAATIILRED--  
-----N-CHFLRVDKQDFNRI-IKDVEAKTMRLEEKGQVV-----  
>Rapgef3\_[Ursus\_maritimus]\_671024230  
AVAHLSNSV---KRELAAVLLFEPHSHKAGTV---LFSQGDKGTS---WYIIWKGSVNVVT  
H----GKGL-----V-T---T-LHEG-DDFGQLALVNDAPRAATIILRED--  
-----N-CHFLRVDKQDFNRI-IKDVEAKTMRLEEKGQVV-----  
>Rapgef3\_[Vicugna\_pacos]\_970713237  
AVAHLSNSV---KRELAAVLLFEPHSHKAGTV---LFSQGDKGTS---WYIIWKGSVNVVT  
H----GKGL-----V-T---T-LHEG-DDFGQLALVNDAPRAATIILRED--  
-----N-CHFLRVDKQDFNRI-IKDVEAKTMRLEEKGQVV-----  
>Rapgef3\_[Xenopus\_laevis]\_148227834  
AVSHLSNSV---KKELASVLIFESHAKAGAV---LFNQGDKGTS---WYIIWKGSVNVIT  
H----GKGL-----V-A---T-LHEG-DDFGQLALVNDAPRAATIVLRED--  
-----N-CHFLRVDKHDNRI-LRDVEANTVRLKEHEKGQVV-----



>Rapgef3\_[Xenopus\_tropicalis]\_847104409  
AVSHLSNSV---KKELASVLIFESHAKAGTV---LFNQGDKGTS---WYIIWKGSVNVIT  
H----GKGL-----V-A---T-LHEG-DDFGQLALVNDAPRAATIVLRED--  
-----N-CHFLRVDKEDFNRI-LRDVEANTVRLKEHGKVV-----  
>Rapgef4\_[Acanthisitta\_chloris]\_677973646  
ALSHLSTTV---KRELAGVLIFESHKAGTV---LFNQGEEGTS---WYIILKGSVNVVI  
Y----GKGV-----V-C---T-LHEG-DDFGKLALVNDAPRAASIVLRED--  
-----N-CHFLRVDKEDFNRI-LRDVEANTVRLKEHDQDVLV---  
>Rapgef4\_[Acinonyx\_jubatus]\_961712463  
ALSHLSTTV---KRELAGVLIFESHAKGGTV---LFNQGEEGTS---WYIILKGSVNVVI  
Y----GKGV-----V-C---T-LHEG-DDFGKLALVNDAPRAASIVLRED--  
-----N-CHFLRVDKEDFNRI-LRDVEANTVRLKEHDQDVLV---  
>Rapgef4\_[Acropora\_digitifera]\_1005470793  
ALHYLSTTV---KKELAAVVVFESCDNMGTV---LFKEGEEGNS---WYVIIKGINNVIV  
H----GKGV-----V-C---Q-LNEG-DDFGKLALVNNALRTATITETAKD--  
-----S-CHFLKIGKSDFNRI-FQDVETNTVHLKEHGQDVLV---  
>Rapgef4\_[Acyrtosiphon\_pisum]\_641671152  
ALAHLPNSV---KRELASVVVFEAHPKAGHT---LFRQDDGKA---WYVIMQGAVSVET  
--YSKGI-----V-E---S-LYEG-EDFGGLALIHNVPRSATITVKED--  
-----N-THLLRVDKDSYNKI-VRDIEANTVRLKELGSDVLV---  
>Rapgef4\_[Ailuropoda\_melanoleuca]\_752414095  
ALSHLSTTV---KRELAGVLIFESHAKGGTV---LFNQGEEGTS---WYIILKGSVNVVI  
Y----GKGV-----V-C---T-LHEG-DDFGKLALVNDAPRAASIVLRED--  
-----N-CHFLRVDKEDFNRI-LRDVEANTVRLKEHDQDVLV---  
>Rapgef4\_[Alligator\_mississippiensis]\_564252547  
ALSHLSTTV---KRELAGVLIFESHKAGTV---LFNQGEEGTS---WYIILKGSVNVVI  
Y----GKGV-----V-C---T-LHEG-DDFGKLALVNDAPRAASIVLRED--  
-----N-CHFLRVDKEDFNRI-LRDVEANTVRLKEHDQDVLV---  
>Rapgef4\_[Amazona\_aestiva]\_944296700  
ALSHLSTTV---KRELAGVLIFESHKAGTV---LFNQGEEGTS---WYIILKGSVNVVI  
Y----GKGV-----V-C---T-LHEG-DDFGKLALVNDAPRAASIVLRED--  
-----N-CHFLRVDKEDFNRI-LRDVEANTVRLKEHDQDVLV---  
>Rapgef4\_[Amphimedon\_queenslandica]\_761901406  
AFGHLSNAI---KEELASVVQLENHPVAGKY---LFKEGDAGTS---WYIILKGSVNVLV  
-----GKDV-----M-C---T-LHEG-DEFGKLALLNNAPRTTSVQLREP--  
-----N-CVFLRVDKEDFNRI-LLSVEKNTVKIKEHGKEVLL---  
>Rapgef4\_[Anas\_platyrhynchos]\_874471726  
ALSHLSTTV---KRELAGVLIFESHKAGTV---LFNQGEEGTS---WYIILKGSVNVVI  
Y----GKGV-----V-C---T-LHEG-DDFGKLALVNDAPRAASIVLRED--  
-----N-CHFLRVDKEDFNRI-LRDVEANTVRLKEHDQDVLV---  
>Rapgef4\_[Anolis\_carolinensis]\_637340171  
ALSHLSTTV---KRELAGVLVLFESHKAGTV---LFNQGEEGTS---WYIILKGSVNVVI  
Y----GKGV-----V-C---T-LHEG-DDFGKLALVNDAPRAASIVLRED--  
-----N-CHFLRVDKEDFNRI-LRDVEANTVRLKEHEQDVLV---  
>Rapgef4\_[Anser\_cygnoides\_domesticus]\_902873580  
ALSHLSTTV---KRELAGVLIFESHKAGTV---LFNQGEEGTS---WYIILKGSVNVVI  
Y----GKGV-----V-C---T-LHEG-DDFGKLALVNDAPRAASIVLRED--  
-----N-CHFLRVDKEDFNRI-LRDVEANTVRLKEHDQDVLV---  
>Rapgef4\_[Aotus\_nancymae]\_817294750  
ALSHLSTTV---KRELAGVLIFESHAKGGTV---LFNQGEEGTS---WYIILKGSVNVVI  
Y----GKGV-----V-C---T-LHEG-DDFGKLALVNDAPRAASIVLRED--  
-----N-CHFLRVDKEDFNRI-LRDVEANTVRLKEHDQDVLV---  
>Rapgef4\_[Apaloderma\_vittatum]\_677309553  
ALSHLSTTV---KRELAGVLIFESHKAGTV---LFNQGEEGTS---WYIILKGSVNVVI

Y----GKGV-----V-C---T-LHEG-DDFGKLALVNDAPRAASIVLRED--  
-----N-CHFLRVDKEDFNRI-LRDVEANTVRLKEHDQDVLV---  
>Rapgef4\_[Aptenodytes\_forsteri]\_686601170  
ALSHLSTTV---KRELAGVLIFESHHPKAGTV---LFNQGEEGTS---WYIILKGSVNVVI  
Y----GKGV-----V-C---T-LHEG-DDFGKLALVNDAPRAASIVLRED--  
-----N-CHFLRVDKEDFNRI-LRDVEANTVRLKEHDQDVLV---  
>Rapgef4\_[Apteryx\_australis\_mantelli]\_926533754  
ALSHLSTTV---KRELAGVLIFESHHPKAGTV---LFNQGEEGTS---WYIILKGSVNVVI  
Y----GKGV-----V-C---T-LHEG-DDFGKLALVNDAPRAASIVLRED--  
-----N-CHFLRVDKEDFNRI-LRDVEANTVRLKEHDQDVLV---  
>Rapgef4\_[Aquila\_chrysaetos\_canadensis]\_768339852  
ALSHLSTTV---KRELAGVLIFESHHPKAGTV---LFNQGEEGTS---WYIILKGSVNVVI  
Y----GKGV-----V-C---T-LHEG-DDFGKLALVNDAPRAASIVLRED--  
-----N-CHFLRVDKEDFNRI-LRDVEANTVRLKEHDQDVLV---  
>Rapgef4\_[Astyanax\_mexicanus]\_597779974  
ALSHLSTTV---KRELAGVLIFESHAKAGTV---LFNQGEEGTS---WYIILKGSVNVVI  
Y----GKGV-----V-C---T-LHEG-DDFGKLALVNDAPRAASIVLRED--  
-----N-CHFLRVDKEDFNRI-LRDVEANTVRLKEHEEDVLV---  
>Rapgef4\_[Bactrocera\_cucurbitae]\_751444012  
ALSHLSTSI---KRELSSIIVFESHAKAGTI---LFNQGDEGRS---WYIILKGSVDVVI  
H----GKGT-----V-A---T-LKNG-DDFGKLALINDAPRAATIVLKEN--  
-----D-CHLLRVDKEHFNRI-LRDVEANTLRLQEHGKDVLV---  
>Rapgef4\_[Bactrocera\_dorsalis]\_751799864  
ALSHLSTSI---KRELSSIIVFESHAQAGTI---LFNQGDEGRS---WYIILKGSVDVVI  
H----GKGT-----V-A---T-LKNG-DDFGKLALINDAPRAATIVLKEN--  
-----N-CHLLRVDKEHFNRI-LRDVEANTLRLQEHGKDVLV---  
>Rapgef4\_[Balaenoptera\_acutorostrata\_scammoni]\_594670782  
ALSHLSTTV---KRELAGVLIFESHAKGGTV---LFNQGEEGTS---WYIILKGSVNVVI  
Y----GKGV-----V-C---T-LHEG-DDFGKLALVNDAPRAASIVLRED--  
-----N-CHFLRVDKEDFNRI-LRDVEANTVRLKEHDQDVLV---  
>Rapgef4\_[Balearica\_regulorum\_gibbericeps]\_723568217  
ALSHLSTTV---KRELAGVLIFESHHPKAGTV---LFNQGEEGTS---WYIILKGSVNVVI  
Y----GKGV-----V-C---T-LHEG-DDFGKLALVNDAPRAASIVLRED--  
-----N-CHFLRVDKEDFNRI-LRDVEANTVRLKEHDQDVLV---  
>Rapgef4\_[Bison\_bison\_bison]\_742139618  
ALSHLSTTV---KRELAAVLIFESHAKGGTV---LFNQGEEGTS---WYIILKGSVNVVI  
Y----GKGV-----V-C---T-LHEG-DDFGKLALVNDAPRAASIVLRED--  
-----N-CHFLRVDKEDFNRI-LRDVEANTVRLKEHDQDVLV---  
>Rapgef4\_[Bos\_mutus]\_555950849  
ALSHLSTTV---KRELAAVLIFESHAKGGTV---LFNQGEEGTS---WYIILKGSVNVVI  
Y----GKGV-----V-C---T-LHEG-DDFGKLALVNDAPRAASIVLRED--  
-----N-CHFLRVDKEDFNRI-LRDVEANTVRLKEHDQDVLV---  
>Rapgef4\_[Bos\_taurus]\_528938929  
ALSHLSTTV---KRELAAVLIFESHAKGGTV---LFNQGEEGTS---WYIILKGSVNVVI  
Y----GKGV-----V-C---T-LHEG-DDFGKLALVNDAPRAASIVLRED--  
-----N-CHFLRVDKEDFNRI-LRDVEANTVRLKEHDQDVLV---  
>Rapgef4\_[Bubalus\_bubalis]\_594078793  
ALSHLSTTV---KRELAAVLIFESHAKGGTV---LFNQGEEGTS---WYIILKGSVNVVI  
Y----GKGV-----V-C---T-LHEG-DDFGKLALVNDAPRAASIVLRED--  
-----N-CHFLRVDKEDFNRI-LRDVEANTVRLKEHDQDVLV---  
>Rapgef4\_[Buceros\_rhinoceros\_silvestris]\_704172716  
ALSHLSTTV---KRELAGVLIFESHHPKAGTV---LFNQGEEGTS---WYIILKGSVNVVI  
Y----GK-----  
-----

>Rapgef4\_[Callorhinchus\_milii]\_632945696  
ALSHLSTTV---KRELAGVLIFESHAKAGTV---LFNQGEEGTS---WYIILKGSVNVVI  
Y----GKGV-----V-C---T-LHEG-DDFGKLALVNDAPRAASIVLHED--  
-----N-CHFLRVDKEDFNRI-LRDVEANTVRLKEHEQDVLV---  
>Rapgef4\_[Calypste\_anna]\_663246129  
ALSHLSTTV---KRELAGVLIFESHAKAGTV---LFNQGEEGTS---WYIILKGSVNVVI  
Y----GKGV-----V-C---T-LHEG-DDFGKLALVNDAPRAASIVLRED--  
-----N-CHFLRVDKEDFNRI-LRDVEANTVRLKEHDQDVLV---  
>Rapgef4\_[Camelus\_bactrianus]\_743729783  
ALSHLSTTV---KRELAGVLIFESHAKAGTV---LFNQGEEGTS---WYIILKGSVNVVI  
Y----GKGV-----V-C---T-LHEG-DDFGKLALVNDAPRAASIVLRED--  
-----N-CHFLRVDKEDFNRI-LRDVEANTVRLKEHDQDVLV---  
>Rapgef4\_[Camelus\_dromedarius]\_744571829  
ALSHLSTTV---KRELAGVLIFESHAKAGTV---LFNQGEEGTS---WYIILKGSVNVVI  
Y----GKGV-----V-C---T-LHEG-DDFGKLALVNDAPRAASIVLRED--  
-----N-CHFLRVDKEDFNRI-LRDVEANTVRLKEHDQDVLV---  
>Rapgef4\_[Camelus\_ferus]\_560926398  
ALSHLSTTV---KRELAGVLIFESHAKAGTV---LFNQGEEGTS---WYIILKGSVNVVI  
Y----GKGV-----V-C---T-LHEG-DDFGKLALVNDAPRAASIVLRED--  
-----N-CHFLRVDKEDFNRI-LRDVEANTVRLKEHDQDVLV---  
>Rapgef4\_[Canis\_lupus\_familiaris]\_54555228  
ALSHLSTTV---KRELAGVLIFESHAKAGTV---LFNQGEEGTS---WYIILKGSVNVVI  
Y----GKGV-----V-C---T-LHEG-DDFGKLALVNDAPRAASIVLRED--  
-----N-CHFLRVDKEDFNRI-LRDVEANTVRLKEHDQDVLV---  
>Rapgef4\_[Capra\_hircus]\_548453219  
ALSHLSTTV---KRELA AVLIFESHAKAGTV---LFNQGEEGTS---WYIILKGSVNVVI  
Y----GKGV-----V-C---T-LHEG-DDFGKLALVNDAPRAASIVLRED--  
-----N-CHFLRVDKEDFNRI-LRDVEANTVRLKEHDQDVLV---  
>Rapgef4\_[Caprimulgus\_carolinensis]\_683458636  
ALSHLSTTV---KRELAGVLIFESHAKAGTV---LFNQGEEGTS---WYIILKGSVNVVI  
Y----GKGV-----V-C---T-LHEG-DDFGKLALVNDAPRAASIVLRED--  
-----N-CHFLRVDKEDFNRI-LRDVEANTVRLKEHDQDVLV---  
>Rapgef4\_[Cariama\_cristata]\_698411398  
ALSHLSTTV---KRELAGVLIFESHAKAGTV---LFNQGEEGTS---WYIILKGSVNVVI  
Y----GKGV-----V-C---T-LHEG-DDFGKLALVNDAPRAASIVLRED--  
-----N-CHFLRVDKEDFNRI-LRDVEANTVRLKEHDQDVLV---  
>Rapgef4\_[Carlito\_syrichta]\_640812553  
ALSHLSTTV---KRELAGVLIFESHAKAGTV---LFNQGEEGTS---WYIILKGSVNVVI  
Y----GKGV-----V-C---T-LHEG-DDFGKLALVNDAPRAASIVLRED--  
-----N-CHFLRVDKEDFNRI-LRDVEANTVRLKEHDQDVLV---  
>Rapgef4\_[Cathartes\_aura]\_677231281  
ALSHLSTTV---KRELAGVLIFESHAKAGTV---LFNQGEEGTS---WYIILKGSVNVVI  
Y----GKGV-----V-C---T-LHEG-DDFGKLALVNDAPRAASIVLRED--  
-----N-CHFLRVDKEDFNRI-LRDVEANTVRLKEHDQDVLV---  
>Rapgef4\_[Cavia\_porcellus]\_884941742  
ALSHLSTTV---KRELAGVLIFESHAKAGTV---LFNQGEEGTS---WYIILKGSVNVVI  
Y----GKGV-----V-C---T-LHEG-DDFGKLALVNDAPRAASIVLRED--  
-----N-CHFLRVDKEDFNRI-LRDVEANTVRLKEHDQDVLV---  
>Rapgef4\_[Cebus\_capucinus\_imitator]\_1044377132  
ALSHLSTTV---KRELAGVLIFESHAKAGTV---LFNQGEEGTS---WYIILKGSVNVVI  
Y----GKGV-----V-C---T-LHEG-DDFGKLALVNDAPRAASIVLRED--  
-----N-CHFLRVDKEDFNRI-LRDVEANTVRLKEHDQDVLV---  
>Rapgef4\_[Ceratitis\_capitata]\_499006314  
ALSHLSTSI---KRELSSIIVFESHAQAGTI---LFNQGDEGRS---WYILLKGSVDVVI

H----GKGT-----V-A---T-LKNG-DDFGKLALINDAPRAATIVLKEN--  
-----N-CHLLRVDKEHFNRI-LRDVEANTLRLQEHGKDVLV---  
>Rapgef4\_[Ceratotherium\_simum\_simum]\_478504778  
ALSHLSTTV---KRELAGVLIFESHAKGGTV---LFNQGEEGTS---WYIILKGSVNVVI  
Y----GKGV-----V-C---T-LHEG-DDFGKLALVNDAPRAASIVLRED--  
-----N-CHFLRVDKEDFNRI-LRDVEANTVRLKEHDQDVLV---  
>Rapgef4\_[Chaetura\_pelagica]\_701389410  
ALSHLSTTV---KRELAGVLIFESHKAGTV---LFNQGEEGTS---WYIILKGSVNVVI  
Y----GKGV-----V-C---T-LHEG-DDFGKLALVNDAPRAASIVLRED--  
-----N-CHFLRVDKEDFNRI-LRDVEANTVRLKEHDQDVLV---  
>Rapgef4\_[Charadrius\_vociferus]\_699632734  
ALSHLSTTV---KRELAGVLIFESHKAGTV---LFNQGEEGTS---WYIILKGSVNVVI  
Y----GKGV-----V-C---T-LHEG-DDFGKLALVNDAPRAASIVLRED--  
-----N-CHFLRVDKEDFNRI-LRDVEANTVRLKEHDQDVLV---  
>Rapgef4\_[Chelonia\_mydas]\_591371593  
ALSHLSTTV---KRELAGVLIFESHKAGTV---LFNQGEEGTS---WYIILKGSVNVVI  
Y----GKTID-HLNIQTORSYRHT-C---T-NPKGIDDFGKLALVNDAPRAASIVLRED--  
-----N-CHFLRVDKEDFNRI-LRDVEANTVRLKEHDQDVLV---  
>Rapgef4\_[Chinchilla\_lanigera]\_918612485  
ALSHLSTTV---KRELAGVLIFESHAKGGTV---LFNQGEEGTS---WYIILKGSVNVVI  
Y----GKGV-----V-C---T-LHEG-DDFGKLALVNDAPRAASIVLRED--  
-----N-CHFLRVDKEDFNRI-LRDVEANTVRLKEHDQDVLV---  
>Rapgef4\_[Chlamydotis\_macqueenii]\_677141915  
-----V---KRELAGVLIFESHKAGTV---LFNQGEEGTS---WYIILKGSVNVVI  
Y----GKGV-----V-C---T-LHEG-DDFGKLALVNDAPRAASIVLRED--  
-----N-CHFLRVDKEDFNRI-LRDVEANTVRLKEHDQDVLV---  
>Rapgef4\_[Chlorocebus\_sabaeus]\_635058795  
ALSHLSTTV---KRELAGVLIFESHAKGGTV---LFNQGEEGTS---WYIILKGSVNVVI  
Y----GKGV-----V-C---T-LHEG-DDFGKLALVNDAPRAASIVLRED--  
-----N-CHFLRVDKEDFNRI-LRDVEANTVRLKEHDQDVLV---  
>Rapgef4\_[Chrysemys\_picta\_bellii]\_530621676  
ALSHLSTTV---KRELAGVLIFESHKAGTV---LFNQGEEGTS---WYIILKGSVNVVI  
Y----GKGV-----V-C---T-LHEG-DDFGKLALVNDAPRAASIVLRED--  
-----N-CHFLRVDKEDFNRI-LRDVEANTVRLKEHDQDVLV---  
>Rapgef4\_[Chrysochloris\_asiatica]\_586472252  
ALSHLSTTV---KRELAGVLIFESHAKGGTV---LFNQGEEGTS---WYIILKGSVNVVI  
Y----GKGV-----V-C---T-LHEG-DDFGKLALVNDAPRAASIVLRED--  
-----N-CHFLRVDKEDFNRI-LRDVEANTVRLKEHDQDVLV---  
>Rapgef4\_[Cimex\_lectularius]\_939265223  
-LSHLSNSM---KRELASVIMFEAHPRSGSI---VFEQGEGRS---WYLVNLNGSVDDVVI  
H----GKGV-----V-A---T-LHQG-EDFGKLALINDVPRAASIIIVRED--  
-----G-THLLRVDKEDFNRI-LRDVEANTVRLKEHGKDVLV---  
>Rapgef4\_[Ciona\_intestinalis]\_699251985  
ALTQLSDQV---KQQLAAVLQFEFYHKSGET---IFHQGDEGRS---WYIISKGSVDVVI  
Q----GKGV-----V-C---T-LHEG-DDFGSLAIVNDAPRAATIVTTKP--  
-----N-CQFLRVDKYDFNKI-HEEVESKTVRLKEHGKDVLV-----  
>Rapgef4\_[Clupea\_harengus]\_831318321  
ALSHLSTTV---KRELAGVLIFESHAKAGTV---LFNQGEEGTS---WYIILKGSVNVVI  
Y----GKGV-----V-C---T-LHEG-DDFGKLALVNDAPRAASIVLRED--  
-----N-CHFLRVDKEDFNRI-LRDVEANTVRLKEHDQDVLV---  
>Rapgef4\_[Colius\_striatus]\_706115654  
ALSHLSTTV---KRELAGVLIFESHKAGTV---LFNQGEEGTS---WYIILKGSVNVVI  
Y----GKGV-----V-C---T-LHEG-DDFGKLALVNDAPRAASIVLRED--  
-----N-CHFLRVDKEDFNRI-LRDVEANTVRLKEHDQDVLV---

>Rapgef4\_[Colobus\_angolensis\_palliatus]\_795183836  
ALSHLSTTV---KRELAGVLIFESHAKGGTV---LFNQGEEGTS---WYIILKGSVNVVI  
Y----GKGV-----V-C---T-LHEG-DDFGKLALVNDAPRAASIVLRED--  
-----N-CHFLRVDKEDFNRI-LRDVEANTVRLKEHDQDVLV---  
>Rapgef4\_[Columba\_livia]\_449270176  
ALSHLSTTV---KRELAGVLIFESHAKGGTV---LFNQGEEGTS---WYIILKGSVNVVI  
Y----GKGV-----V-C---T-LHEG-DDFGKLALVNDAPRAASIVLRED--  
-----N-CHFLRVDKEDFNRI-LRDVEANTVRLKEHDQDVLV---  
>Rapgef4\_[Condylura\_cristata]\_507926658  
ALSHLSTTV---KRELAGVLIFESHAKGGTV---LFNQGEEGTS---WYIILKGSVNVVI  
Y----GKGV-----V-C---T-LHEG-DDFGKLALVNDAPRAASIVLRED--  
-----N-CHFLRVDKEDFNRI-LRDVEANTVRLKEHDQDVLV---  
>Rapgef4\_[Corvus\_cornix\_cornix]\_727051291  
ALSHLSTTV---KRELAGVLIFESHAKGGTV---LFNQGEEGTS---WYIILKGSVNVVI  
Y----GKGV-----V-C---T-LHEG-DDFGKLALVNDAPRAASIVLRED--  
-----N-CHFLRVDKEDFNRI-LRDVEANTVRLKEHDQDVLV---  
>Rapgef4\_[Coturnix\_japonica]\_1003923803  
ALSHLSTTV---KRELAGVLIFESHAKGGTV---LFNQGEEGTS---WYIILKGSVNVVI  
Y----GKGV-----V-C---T-LHEG-DDFGKLALVNDAPRAASIVLRED--  
-----N-CHFLRVDKEDFNRI-LRDVEANTVRLKEHDQDVLV---  
>Rapgef4\_[Crassostrea\_gigas]\_405960606  
ALSHLSTSV---KRELASVLVFESHAKAGTV---LFNQGDEGKS---WYIILKGSVNVVI  
Y----GKGA-----V-C---T-LHEG-DDFGKLALLNDAPRAATIVLRED--  
-----N-CHFLRVDKEDFNRI-LRDVEANTVRLKEHGQDVLV---  
>Rapgef4\_[Cricetulus\_griseus]\_1032830925  
ALSHLSTTV---KRELAGVLIFESHAKGGTV---LFNQGEEGTS---WYIILKGSVNVVI  
Y----GKGV-----V-C---T-LHEG-DDFGKLALVNDAPRAASIVLRED--  
-----N-CHFLRVDKEDFNRI-LRDVEANTVRLKEHDQDVLV---  
>Rapgef4\_[Cynoglossus\_semilaevis]\_657798823  
ALSHLTTTV---KQELAGVLMFESRAKTGTV---LFNQGEEGTS---WYIILKGSVNVVI  
H----GKGV-----V-C---T-LHEG-DDFGKLALVNDAPRAASIVLRED--  
-----N-CHFLRVDKEDFNRI-LRDVEANTVRLKEHGQDVLV---  
>Rapgef4\_[Cyprinodon\_variegatus]\_974068430  
ALSHLSTTV---KRELAGVLIFESHAKGGTV---LFHQGEEGTS---WYIILKGSVNVVI  
Y----GKGV-----V-C---T-LHEG-DDFGKLALVNDAPRAASIVLRED--  
-----N-CHFLRVDKEDFNRI-LRDVEANTVRLKEHGQDVLV---  
>Rapgef4\_[Danio\_rerio]\_1040698669  
ALSHLSTTV---KRELAGVLIFESHAKAGTV---LFNQGEEGTS---WYIILKGSVNVVI  
Y----GKGV-----V-C---T-LHEG-DDFGKLALVNDAPRAASIVLRED--  
-----F-CHFLRVDKEDFNRI-LRDVEANTVRLKEHEEDVLV---  
>Rapgef4\_[Dasypus\_novemcinctus]\_488582886  
ALSHLSTTV---KRELAGVLIFESHAKGGTV---LFNQGEEGTS---WYIILKGSVNVVI  
Y----GKGV-----V-C---T-LHEG-DDFGKLALVNDAPRAASIVLRED--  
-----N-CHFLRVDKEDFNRI-LRDVEANTVRLKEHDQDVLV---  
>Rapgef4\_[Diaphorina\_citri]\_1041549174  
-----MFHQGDEGKS---WYIIIIQGSVDVVI  
Y----GKGC-----V-T---S-LYAG-EDFGKLALVNNAPRAATIVTRED--  
-----N-CHFLRVDKDDFIRI-MRDVEANTVRLKEHGKDVVLV---  
>Rapgef4\_[Dipodomys\_ordii]\_852730824  
ALSHLSTTV---KRELAGVLIFESHAKGGTV---LFNQGEEGTS---WYIILKGSVNVVI  
Y----GKGV-----V-C---T-LHEG-DDFGKLALVNDAPRAASIVLRED--  
-----N-CHFLRVDKEDFNRI-LRDVEANTVRLKEHDQDVLV---  
>Rapgef4\_[Diuraphis\_noxia]\_985425009  
-----FRQGDEGKA---WYVIMQGAVNVET

```

--YSGKV-----V-E---S-LYEG-EDFGGLALIHNVPRSATITVKED--
-----N-THLLRVDKDSYNKI-VRDIETNTVRLKELGSDVLV---
>Rapgef4_[Drosophila_bipectinata]_1037099499
ALSHLSTSI---KRELSSIFVFEAHAQAGTI---LFNQGDEGRS---WYILLKGSVDVVI
H----GKGT-----V-A---T-LKTG-DDFGKLALINDAPRAATIVLKEN--
-----N-CHLLRVDKEHFNRI-LRDVEANTLRLQEHGKDVLV---
>Rapgef4_[Drosophila_ficusphila]_1036935383
ALSHLSTSI---KRELSAIFVFEAHAQAGTI---LFNQGDEGRS---WYILLKGSVDVVI
H----GKGT-----V-A---T-LKTG-DDFGKLALINDAPRAATIVLKEN--
-----N-CHLLRVDKEHFNRI-LRDVEANTLRLQEHGKDVLV---
>Rapgef4_[Drosophila_kikkawai]_1036730969
ALSHLSTSI---KRELSSIFVFEAHAQAGTI---LFNQGDEGRS---WYILLKGSVDVVI
H----GKGT-----V-A---T-LKTG-DDFGKLALINDAPRAATIVLKEN--
-----N-CHLLRVDKEHFNRI-LRDVEANTLRLQEHGKDVLV---
>Rapgef4_[Drosophila_miranda]_1037006478
ALSHLSTSI---KRELSSIFVFEAHAKAGTI---LFNQGDEGRS---WYILLKGSVDVVI
H----GKGT-----V-A---T-LKTG-DDFGKLALINDAPRAATIVLKEN--
-----N-CHLLRVDKEHFNRI-LRDVEANTLRLQEHGKDVLV---
>Rapgef4_[Drosophila_rhopaloea]_1036871102
ALSHLSTSI---KRELSSIFVFEAHAQAGTI---LFNQGDEGRS---WYILLKGSVDVVI
H----GKGT-----V-A---T-LKTG-DDFGKLALINDAPRAATIVLKEN--
-----N-CHLLRVDKEHFNRI-LRDVEANTLRLQEHGKDVLV---
>Rapgef4_[Drosophila_suzukii]_1036073993
ALSHLSTSI---KRELSSIFVFEAHAQAGTI---LFNQGDEGRS---WYILLKGSVDVVI
H----GKGT-----V-A---T-LKTG-DDFGKLALINDAPRAATIVLKEN--
-----N-CHLLRVDKEHFNRI-LRDVEANTLRLQEHGKDVLV---
>Rapgef4_[Drosophila_takahashii]_1036922041
ALSHLSTSI---KRELSSIFVFEAHAQAGTI---LFNQGDEGRS---WYILLKGSVDVVI
H----GKGT-----V-A---T-LKTG-DDFGKLALINDAPRAATIVLKEN--
-----N-CHLLRVDKEHFNRI-LRDVEANTLRLQEHGKDVLV---
>Rapgef4_[Echinops_telfairi]_850287185
ALSHLSTTV---KRELAGVLIFESHAKGGTV---LFNQGEEGTS---WYIILKGSVNVVI
Y----GKGV-----V-C---T-LHEG-DDFGKLALVNDAPRAASIVLRED--
-----N-CHFLRVDKEDFNRI-LRDVEANTVRLKEHDQDVLV---
>Rapgef4_[Egretta_garzetta]_697837447
ALSHLSTTV---KRELAGVLIFESHAKAGTV---LFNQGEEGTS---WYIILKGSVNVVI
Y----GKGV-----V-C---T-LHEG-DDFGKLALVNDAPRAASIVLRED--
-----N-CHFLRVDKEDFNRI-LRDVEANTVRLKEHDQDVLV---
>Rapgef4_[Elephantulus_edwardii]_585637319
ALSHLSTTV---KRELAGVLIFESHAKGGTV---LFNQGEEGTS---WYIILKGSVNVVI
Y----GKGV-----V-C---T-LHEG-DDFGKLALVNDAPRAASIVLRED--
-----N-CHFLRVDKEDFNRI-LRDVEANTVRLKEHDQDVLV---
>Rapgef4_[Eptesicus_fuscus]_641696739
ALSHLSTTV---KRELAGVLIFESHAKGGTV---LFNQGEEGTS---WYIILKGSVNVVI
Y----GKGV-----V-C---T-LHEG-DDFGKLALVNDAPRAASIVLRED--
-----N-CHFLRVDKEDFNRI-LRDVEANTVRLKEHDQDVLV---
>Rapgef4_[Equus_asinus]_958716129
ALSHLSTTV---KRELAGVLIFESHAKGGTV---LFNQGEEGTS---WYIILKGSVNVVI
Y----GKGV-----V-C---T-LHEG-DDFGKLALVNDAPRAASIVLRED--
-----N-CHFLRVDKEDFNRI-LRDVEANTVRLKEHDQDVLV---
>Rapgef4_[Equus_caballus]_953879137
ALSHLSTTV---KRELAGVLIFESHAKGGTV---LFNQGEEGTS---WYIILKGSVNVVI
Y----GKGV-----V-C---T-LHEG-DDFGKLALVNDAPRAASIVLRED--
-----N-CHFLRVDKEDFNRI-LRDVEANTVRLKEHDQDVLV---

```

>Rapgef4\_[*Equus przewalskii*]<sub>664748190</sub>  
ALSHLSTTV---KRELAGVLIFESHAKGGTV---LFNQGEEGTS---WYIILKGSVNVVI  
Y----GKGV-----V-C---T-LHEG-DDFGKLALVNDAPRAASIVLRED--  
-----N-CHFLRVDKEDFNRI-LRDVEANTVRLKEHDQDVLV---  
>Rapgef4\_[*Erinaceus europaeus*]<sub>1016663854</sub>  
ALSHLSTTV---KRELAGVLIFESHAKGGTV---LFNQGEEGTS---WYIILKGSVNVVI  
Y----GKGV-----V-C---T-LHEG-DDFGKLALVNDSPRAASIVLRED--  
-----N-CHFLRVDKEDFNRI-LRDVEANTVRLKEHDQDVLV---  
>Rapgef4\_[*Esox lucius*]<sub>742138478</sub>  
ALSHLSTSV---KRELAGVLIFESHAKAGTV---LFNQGEEGTS---WYIILKGSVNVVI  
Y----GKGV-----V-C---T-LHEG-DDFGKLALVNDAPRSASIVLRED--  
-----N-CHFLRVDKEDFNRI-LRDVEANTVRLKEHDQDVLV---  
>Rapgef4\_[*Eurypyga helias*]<sub>704253784</sub>  
-----YYENLEKGIT---LFRQGDIGTN---WYAVLTGSLDVKV  
--SDTSNH----QDA-----VTI-C---T-LGIG-TAFGE-SILDNTPRHATIVTRE---  
-----Y-SELLRIEQKDFKTL-----  
>Rapgef4\_[*Falco peregrinus*]<sub>909796782</sub>  
ALSHLSTTV---KRELAGVLIFESHKAGTV---LFNQGEEGTS---WYIILKGSVNVVI  
Y----GKGV-----V-C---T-LHEG-DDFGKLALVNDAPRAASIVLRED--  
-----N-CHFLRVDKEDFNRI-LRDVEANTVRLKEHDQDVLV---  
>Rapgef4\_[*Felis catus*]<sub>586997380</sub>  
ALSHLSTTV---KRELAGVLIFESHAKGGTV---LFNQGEEGTS---WYIILKGSVNVVI  
Y----GKGV-----V-C---T-LHEG-DDFGKLALVNDAPRAASIVLRED--  
-----N-CHFLRVDKEDFNRI-LRDVEANTVRLKEHDQDVLV---  
>Rapgef4\_[*Ficedula albicollis*]<sub>525003360</sub>  
ALSHLSTTV---KRELAGVLIFESHKAGTV---LFNQGEEGTS---WYIILKGSVNVVI  
Y----GKGV-----V-C---T-LHEG-DDFGKLALVNDAPRAASIVLRED--  
-----N-CHFLRVDKEDFNRI-LRDVEANTVRLKEHDQDVLV---  
>Rapgef4\_[*Fukomys damarensis*]<sub>731272280</sub>  
ALSHLSTTV---KRELAGVLIFESHAKGGTV---LFNQGEEGTS---WYIILKGSVNVVI  
Y----GKGV-----V-C---T-LHEG-DDFGKLALVNDAPRAASIVLRED--  
-----N-CHFLRVDKEDFNRI-LRDVEANTVRLKEHDQDVLV---  
>Rapgef4\_[*Fulmarus glacialis*]<sub>679000713</sub>  
ALSHLSTTV---KRELAGVLIFESHKAGTV---LFNQGEEGTS---WYIILKGSVNVVI  
Y----GKGV-----V-C---T-LHEG-DDFGKLALVNDAPRAASIVLRED--  
-----N-CHFLRVDKEDFNRI-LRDVEANTVRLKEHDQDVLV---  
>Rapgef4\_[*Fundulus heteroclitus*]<sub>831511149</sub>  
ALSHLSTTV---KRQLAGVLIFESHERAGTV---LFHQGEEGTS---WYIILKGSVNVVI  
Y----GKGV-----V-C---T-LHEG-DDFGKLALVNDAPRAASIVLRED--  
-----N-CHFLRVDKEDFNSI-LRDVEANTVRLKEHQDVLV---  
>Rapgef4\_[*Galeopterus variegatus*]<sub>667257960</sub>  
ALSHLSTTV---KRELAGVLIFESHAKGGTV---LFNQGEEGTS---WYIILKGSVNVVI  
Y----GKGV-----V-C---T-LHEG-DDFGKLALVNDAPRAASIVLRED--  
-----N-CHFLRVDKEDFNRI-LRDVEANTVRLKEHDQDVLV---  
>Rapgef4\_[*Gallus gallus*]<sub>971405305</sub>  
ALSHLSTTV---KRELAGVLIFESHKAGTV---LFNQGEEGTS---WYIILKGSVNVVI  
Y----GKGV-----V-C---T-LHEG-DDFGKLALVNDAPRAASIVLRED--  
-----N-CHFLRVDKEDFNRI-LRDVEANTVRLKEHDQDVLV---  
>Rapgef4\_[*Gavia stellata*]<sub>678191532</sub>  
ALSHLSTTV---KRELAGVLIFESHKAGTV---LFNQGEEGTS---WYIILKGSVNVVI  
Y----GKGV-----V-C---T-LHEG-DDFGKLALVNDAPRAASIVLRED--  
-----N-CHFLRVDKEDFNRI-LRDVEANTVRLKEHDQDVLV---  
>Rapgef4\_[*Gorilla gorilla gorilla*]<sub>426337733</sub>  
ALSHLSTTV---KRELAGVLIFESHAKGGTV---LFNQGEEGTS---WYIILKGSVNVVI

Y----GKGV-----V-C---T-LHEG-DDFGKLALVNDAPRAASIVLRED--  
-----N-CHFLRVDKEDFNRI-LRDVEANTVRLKEHDQDVLV---  
>Rapgef4\_[Haliaeetus\_albicilla]\_700359609  
ALSHLSTTV---KRELAGVLIFESHKAGTV---LFNQGEETS---WYIILKGSVNVVI  
Y----GKGV-----V-C---T-LHEG-DDFGKLALVNDAPRAASIVLRED--  
-----N-CHFLRVDKEDFNRI-LRDVEANTVRLKEHDQDVLV---  
>Rapgef4\_[Haliaeetus\_leucocephalus]\_729721422  
ALSHLSTTV---KRELAGVLIFESHKAGTV---LFNQGEETS---WYIILKGSVNVVI  
Y----GKGV-----V-C---T-LHEG-DDFGKLALVNDAPRAASIVLRED--  
-----N-CHFLRVDKEDFNRI-LRDVEANTVRLKEHDQDVLV---  
>Rapgef4\_[Halyomorpha\_halys]\_939661167  
-LSHLSNSM---KRELASVILFEAHPRPGTV---VFEQGEGRS---WYLVLCGSVDVVI  
H----GKGV-----V-A---T-LHSG-EDFGKLALINEAPRAASIVREE--  
-----N-THLLRVDKDDFNRI-LRDVEANTVRLKEHGKDVLI---  
>Rapgef4\_[Heterocephalus\_glaber]\_351695053  
ALSHLSTTV---KRELAGVLIFESHKAGTV---LFNQGEETS---WYIILKGSVNVVI  
Y----GKGV-----V-C---T-LHEG-DDFGKLALVNDAPRAASIVLRED--  
-----N-CHFLRVDKEDFNRI-LRDVEANTVRLKEHDQDVLV---  
>Rapgef4\_[Homo\_sapiens]\_544583481  
ALSHLSTTV---KRELAGVLIFESHKAGTV---LFNQGEETS---WYIILKGSVNVVI  
Y----GKGV-----V-C---T-LHEG-DDFGKLALVNDAPRAASIVLRED--  
-----N-CHFLRVDKEDFNRI-LRDVEANTVRLKEHDQDVLV---  
>Rapgef4\_[Ictalurus\_punctatus]\_1042363418  
ALSHLSTTV---KRELAGVLIFESHKAGTV---LFNQGEETS---WYIILKGSVNVVI  
Y----GKGV-----V-C---T-LHEG-DDFGKLALVNDAPRAASIVLRED--  
-----N-CHFLRVDKEDFNRI-LRDVEANTVRLKEHEADVLV---  
>Rapgef4\_[Ictidomys\_tridecemlineatus]\_532077758  
ALSHLSTTV---KRELAGVLIFESHKAGTV---LFNQGEETS---WYIILKGSVNVVI  
Y----GKGV-----V-C---T-LHEG-DDFGKLALVNDAPRAASIVLRED--  
-----N-CHFLRVDKEDFNRI-LRDVEANTVRLKEHDQDVLV---  
>Rapgef4\_[Kryptolebias\_marmoratus]\_1041109516  
ALSHLSTTV---KRELAGVLIFESHEKAGTV---LFNQGEETS---WYIILKGSVNVVI  
Y----GKGV-----V-C---T-LHEG-DDFGKLALVNDAPRAASIVLRED--  
-----N-CHFLRVDKEDFNRI-LRDVEANTVRLKEHQDVLV---  
>Rapgef4\_[Larimichthys\_crocea]\_808857288  
-----GV-----V-C---T-LHEG-DDFGKLALVNDAPRAASIVLRDD--  
-----N-CHFLRVDKEDFNRI-LRDVEANTVRLKEHQDVLV---  
>Rapgef4\_[Lepisosteus\_oculatus]\_973161163  
ALSHLSTTV---KRELAGVLIFESHKAGTV---LFNQGEETS---WYIILKGSVNVVI  
Y----GKGV-----V-C---T-LHEG-DDFGKLALVNDAPRAASIVLRED--  
-----N-CHFLRVDKEDFNRI-LRDVEANTVRLKEHQDVLV---  
>Rapgef4\_[Leptonychotes\_weddellii]\_585180428  
ALSHLSTTV---KRELAGVLIFESHKAGTV---LFNQGEETS---WYIILKGSVNVVI  
Y----GKGV-----V-C---T-LHEG-DDFGKLALVNDAPRAASIVLRED--  
-----N-CHFLRVDKEDFNRI-LRDVEANTVRLKEHDQDVLV---  
>Rapgef4\_[Leptosomus\_discolor]\_700415865  
ALSHLSTTV---KRELAGVLIFESHKAGTV---LFNQGEETS---WYIILKGSVNVVI  
Y----GKGV-----V-C---T-LHEG-DDFGKLALVNDAPRAASIVLRED--  
-----N-CHFLRVDKEDFNRI-LRDVEANTVRLKEHDQDVLV---  
>Rapgef4\_[Limulus\_polyphemus]\_926607017  
ALSHLSNSI---KRELAGVLLFETHLRAGTV---LFNQGEETS---WYIILRGSVDVVI  
Y----GKGV-----V-C---T-LHEG-DDFGKLALVNDAPRAATIVTRED--  
-----N-CHFLRVDKDNFNRI-LRDAEANTVRLKEHQDVL-----



>Rapgef4\_[Lingula\_anatina]\_919011590  
 ALSHLSTMV---KRELASVLMFEAHERAGTV---LFNQGDEGTS---WYIILKGSVNVVI  
 Y----GKGV-----V-C---T-LHEG-DDFGKLALVNDAPRAATIVLRED--  
 -----D-CHFLRVDKEDFNRI-LRDVEANTVRLKEHGQDVLV---  
 >Rapgef4\_[Lipotes\_vexillifer]\_602693651  
 ALSHLSTTV---KRELAGVLVFESHAKGGTV---LFNQGEEGTS---WYIILKGSVNVVI  
 Y----GKGV-----V-C---T-LHEG-DDFGKLALVNDAPRAASIVLRED--  
 -----N-CHFLRVDKEDFNRI-LRDVEANTVRLKEHDQDVLV---  
 >Rapgef4\_[Loxodonta\_africana]\_731458745  
 ALSHLSTTV---KRELAGVLIFESHAKGGTV---LFNQGEEGTS---WYIILKGSVNVVI  
 Y----GKGV-----V-C---T-LHEG-DDFGKLALVNDAPRAASIVLRED--  
 -----N-CHFLRVDKEDFNRI-LRDVEANTVRLKEHDQDVLV---  
 >Rapgef4\_[Macaca\_fascicularis]\_544475839  
 ALSHLSTTV---KRELAGVLIFESHAKGGTV---LFNQGEEGTS---WYIILKGSVNVVI  
 Y----GKGV-----V-C---T-LHEG-DDFGKLALVNDAPRAASIVLRED--  
 -----N-CHFLRVDKEDFNRI-LRDVEANTVRLKEHDQDVLV---  
 >Rapgef4\_[Macaca\_nemestrina]\_795659619  
 ALSHLSTTV---KRELAGVLIFESHAKGGTV---LFNQGEEGTS---WYIILKGSVNVVI  
 Y----GKGV-----V-C---T-LHEG-DDFGKLALVNDAPRAASIVLRED--  
 -----N-CHFLRVDKEDFNRI-LRDVEANTVRLKEHDQDVLV---  
 >Rapgef4\_[Manacus\_vitellinus]\_675430502  
 ALSHLSTTV---KRELAGVLIFESHAKAGTV---LFNQGEEGTS---WYIILKGSVNVVI  
 Y----GKGV-----V-C---T-LHEG-DDFGKLALVNDAPRAASIVLRED--  
 -----N-CHFLRVDKEDFNRI-LRDVEANTVRLKEHDQDVLV---  
 >Rapgef4\_[Mandrillus\_leucophaeus]\_795195949  
 ALSHLSTTV---KRELAGVLIFESHAKGGTV---LFNQGEEGTS---WYIILKGSVNVVI  
 Y----GKGV-----V-C---T-LHEG-DDFGKLALVNDAPRAASIVLRED--  
 -----N-CHFLRVDKEDFNRI-LRDVEANTVRLKEHDQDVLV---  
 >Rapgef4\_[Marmota\_marmota\_marmota]\_984087885  
 ALSHLSTTV---KRELAGVLIFESHAKGGTV---LFNQGEEGTS---WYIILKGSVNVVI  
 Y----GKGV-----V-C---T-LHEG-DDFGKLALVNDAPRAASIVLRED--  
 -----N-CHFLRVDKEDFNRI-LRDVEANTVRLKEHDQDVLV---  
 >Rapgef4\_[Maylandia\_zebra]\_499012713  
 ALSHLSTTV---KRELAGVLIFESHAKAGTV---LFNQGEEGTS---WYIILKGSVNVVI  
 Y----GKGV-----V-C---T-LHEG-DDFGKLALVNDAPRAASIVLRED--  
 -----N-CHFLRVDKEDFNRI-LRDVEANTVRLKEHGQDVLV---  
 >Rapgef4\_[Melopsittacus\_undulatus]\_527269285  
 ALSHLSTTV---KRELAGVLIFESHAKAGTV---LFNQGEEGTS---WYIILKGSVNVVI  
 Y----GKGV-----V-C---T-LHEG-DDFGKLALVNDAPRAASIVLRED--  
 -----N-CHFLRVDKEDFNRI-LRDVEANTVRLKEHDQDVLV---  
 >Rapgef4\_[Merops\_nubicus]\_675626701  
 ALSHLSTTV---KRELAGVLIFESHAKAGTV---LFNQGEEGTS---WYIILKGSVNVVI  
 Y----GKGV-----V-C---T-LHEG-DDFGKLALVNDAPRAASIVLRED--  
 -----N-CHFLRVDKEDFNRI-LRDVEANTVRLKEHDQDVLV---  
 >Rapgef4\_[Mesitornis\_unicolor]\_677439496  
 ALSHLSTTV---KRELAGVLIFESHAKAGTV---LFNQGEEGTS---WYIILKGSVNVVI  
 Y----GKGV-----V-C---T-LHEG-DDFGKLALVNDAPRAASIVLRED--  
 -----N-CHFLRVDKEDFNRI-LRDVEANTVRLKEHDQDVLV---  
 >Rapgef4\_[Mesocricetus\_auratus]\_880859278  
 ALSHLSTTV---KRELAGVLIFESHAKGGTV---LFNQGEEGTS---WYIILKGSVNVVI  
 Y----GKGV-----V-C---T-LHEG-DDFGKLALVNDAPRAASIVLRED--  
 -----N-CHFLRVDKEDFNRI-LRDVEANTVRLKEHDQDVLV---  
 >Rapgef4\_[Metaseiulus\_occidentalis]\_391334871  
 ALSHLSNSV---KRELSGVMVFESHKPRDTA---LFNQGDEGKS---WYIILKGSVNVVI

Y----GKGV-----V-C---E-LHEG-DDFGKLALVNDAPRAATIIITREE--  
-----N-CHFLRVDKHDNFNRI-LRDVEANTVRLKEHGQDVLV---  
>Rapgef4\_[Microcebus\_murinus]\_829851277  
ALSHLSTTV---KRELAGVLIFESHAKGGTV---LFNQGEEGTS---WYIILKGSVNVVI  
Y----GKGV-----V-C---T-LHEG-DDFGKLALVNDAPRAASIVLRED--  
-----N-CHFLRVDKEDNFNRI-LRDVEANTVRLKEHDQDVLV---  
>Rapgef4\_[Microtus\_ochrogaster]\_913490047  
ALSHLSTTV---KRELAGVLIFESHAKGGTV---LFNQGEEGTS---WYIILKGSVNVVI  
Y----GKGV-----V-C---T-LHEG-DDFGKLALVNDAPRAASIVLRED--  
-----N-CHFLRVDKEDNFNRI-LRDVEANTVRLKEHDQDVLV---  
>Rapgef4\_[Miniopterus\_natalensis]\_1016626283  
ALSHLSTTV---KRELAGVLIFESHAKGGTV---LFNQGEEGTS---WYIILKGSVNVVI  
Y----GKGV-----V-C---T-LHEG-DDFGKLALVNDAPRAASIVLRED--  
-----N-CHFLRVDKEDNFNRI-LRDVEANTVRLKEHDQDVLV---  
>Rapgef4\_[Monodelphis\_domestica]\_612019670  
ALSHLSTTV---KRELAGVLIFESHAKGGTV---LFNQGEEGTS---WYIILKGSVNVVI  
Y----GKGV-----V-C---T-LHEG-DDFGKLALVNDAPRAASIVLRED--  
-----N-CHFLRVDKEDNFNRI-LRDVEANTVRLKEHDQDVLV---  
>Rapgef4\_[Mus\_musculus]\_323637463  
ALSHLSTTV---KRELAGVLIFESHAKGGTV---LFNQGEEGTS---WYIILKGSVNVVI  
Y----GKGV-----V-C---T-LHEG-DDFGKLALVNDAPRAASIVLRED--  
-----N-CHFLRVDKEDNFNRI-LRDVEANTVRLKEHDQDVLV---  
>Rapgef4\_[Musca\_domestica]\_557781733  
ALSHLSTSI---KRELSSIIVFEAHAQAGTI---LFSQGDEGRS---WYIILKGSVDVVI  
H----GKGT-----V-A---T-LKSG-DDFGKLALINDAPRAATIVLKEN--  
-----N-CHLLRVDKEHFNRI-LRDVEANTLRLQEHGKDVLV---  
>Rapgef4\_[Myotis\_brandtii]\_554525588  
ALSHLSTTV---KRELAGVLIFESHAKGGTV---LFNQGEEGTS---WYIILKGSVNVVI  
Y----GKGV-----V-C---T-LHEG-DDFGKLALVNDAPRAASIVLRED--  
-----N-CHFLRVDKEDNFNRI-LRDVEANTVRLKEHDQDVLV---  
>Rapgef4\_[Myotis\_davidii]\_584081691  
ALSHLSTTV---KRELAGVLIFESHAKGGTV---LFNQGEEGTS---WYIILKGSVNVVI  
Y----GKGV-----V-C---T-LHEG-DDFGKLALVNDAPRAASIVLRED--  
-----N-CHFLRVDKEDNFNRI-LRDVEANTVRLKEHDQDVLV---  
>Rapgef4\_[Myotis\_lucifugus]\_558101247  
ALSHLSTTV---KRELAGVLIFESHAKGGTV---LFNQGEEGTS---WYIILKGSVNVVI  
Y----GKGV-----V-C---T-LHEG-DDFGKLALVNDAPRAASIVLRED--  
-----N-CHFLRVDKEDNFNRI-LRDVEANTVRLKEHDQDVLV---  
>Rapgef4\_[Neolamprologus\_brichardi]\_583986590  
ALSHLSTTV---KRELAGVLIFESHAKAGTV---LFNQGEEGTS---WYIILKGSVNVVI  
Y----GKGV-----V-C---T-LHEG-DDFGKLALVNDAPRAASIVLRED--  
-----N-CHFLRVDKEDNFNRI-LRDVEANTVRLKEHGQDVLV---  
>Rapgef4\_[Nestor\_notabilis]\_701316307  
ALSHLSTTV---KRELAGVLIFESHAKAGTV---LFNQGEEGTS---WYIILKGSVNVVI  
Y----GKGV-----V-C---T-LHEG-DDFGKLALVNDAPRAASIVLRED--  
-----N-CHFLRVDKEDNFNRI-LRDVEANTVRLKEHDQDVLV---  
>Rapgef4\_[Nomascus\_leucogenys]\_821032839  
ALSHLSTTV---KRELAGVLIFESHAKGGTV---LFNQGEEGTS---WYIILKGSVNVVI  
Y----GKGV-----V-C---T-LHEG-DDFGKLALVNDAPRAASIVLRED--  
-----N-CHFLRVDKEDNFNRI-LRDVEANTVRLKEHDQDVLV---  
>Rapgef4\_[Nothobranchius\_furzeri]\_1007766827  
ALSHLSTTV---KRELAGVLIFESHGKAGTV---LFNQGEEGTS---WYIILKGSVNVFI  
Y----GKGV-----V-C---T-LHEG-DDFGKLALVNDAPRAASIIILRED--  
-----N-CHFLRVDKEDNFNRI-LRDVEANTVRLKEHDQDVLV---

>Rapgef4\_[*Notothenia coriiceps*]<sub>736302842</sub>  
ALSHLSTTV---KRELAGVLIFESHAKAGTV---LFSQGEEGTS---WYIILKGSVNVVI  
Y----GKGV-----V-C---T-LHEG-DDFGKLALVNDAPRAASIVLRED--  
-----N-CHFLRVDKEDFNRI-LRDVEANTVRLKEHGQDVLV---  
>Rapgef4\_[*Ochotona princeps*]<sub>504128086</sub>  
ALSHLSTTV---KRELAGVLIFESHAKGGTV---LFNQGEEGTS---WYIILKGSVNVVI  
Y----GKGV-----V-C---T-LHEG-DDFGKLALVNDAPRAASIVLRED--  
-----N-CHFLRVDKEDFNRI-LRDVEANTVRLKEHDQDVLV---  
>Rapgef4\_[*Octopus bimaculoides*]<sub>961078509</sub>  
-----V---KRELASVLVFESHAKKGT---LFRQGDEGKS---WYIILKGSVNVSI  
Y----GKGT-----V-C---Q-LQEG-DDFGKLALVNDAPRSATIFLCED--  
-----N-CHFLRVDKDDFNRI-LRDVEANTVRLNEHGQDVLV---  
>Rapgef4\_[*Odobenus rosmarus divergens*]<sub>472376524</sub>  
ALSHLSTTV---KRELAGVLIFESHAKGGTV---LFNQGEEGTS---WYIILKGSVNVVI  
Y----GKGV-----V-C---T-LHEG-DDFGKLALVNDAPRAASIVLRED--  
-----N-CHFLRVDKEDFNRI-LRDVEANTVRLKEHDQDVLV---  
>Rapgef4\_[*Opisthocomus hoazin*]<sub>700384682</sub>  
ALSHLSTTV---KRELAGVLIFESHAKAGTV---LFNQGEEGTS---WYIILKGSVNVVI  
Y----GKGV-----V-C---T-LHEG-DDFGKLALVNDAPRAASIVLRED--  
-----N-CHFLRVDKEDFNRI-LRDVEANTVRLKEHDQDVLV---  
>Rapgef4\_[*Orcinus orca*]<sub>465994869</sub>  
ALSHLSTTV---KRELAGVLIFESHAKGGTV---LFNQGEEGTS---WYIILKGSVNVVI  
Y----GKGV-----V-C---T-LHEG-DDFGKLALVNDAPRAASIVLRED--  
-----N-CHFLRVDKEDFNRI-LRDVEANTVRLKEHDQDVLV---  
>Rapgef4\_[*Oreochromis niloticus*]<sub>908516742</sub>  
ALSHLSTTV---KRELAGVLIFESHAKAGTV---LFNQGEEGTS---WYIILKGSVNVVI  
Y----GKGV-----V-C---T-LHEG-DDFGKLALVNDAPRAASIVLRED--  
-----N-CHFLRVDKEDFNRI-LRDVEANTVRLKEHGQDVLV---  
>Rapgef4\_[*Ornithorhynchus anatinus*]<sub>620978658</sub>  
ALSHLSTTV---KRELAGVLIFESHAKGGTV---LFNQGEEGTS---WYIILKGSVNVVI  
Y----GKGV-----V-C---T-LHEG-DDFGKLALVNDAPRAASIVLRED--  
-----H-CHFLRVDKEDFNRI-LRDVEANTVRLKEHDQDVLV---  
>Rapgef4\_[*Orycteropus afer afer*]<sub>634820945</sub>  
ALSHLSTTV---KRELAGVLIFESHAKGGTV---LFNQGEEGTS---WYIILKGSVNVVI  
Y----GKGV-----V-C---T-LHEG-DDFGKLALVNDAPRAASIVLRED--  
-----N-CHFLRVDKEDFNRI-LRDVEANTVRLKEHDQDVLV---  
>Rapgef4\_[*Oryctolagus cuniculus*]<sub>655827993</sub>  
ALSHLSTTV---KRELAGVLIFESHAKGGTV---LFNQGEEGTS---WYIILKGSVNVVI  
Y----GKGV-----V-C---T-LHEG-DDFGKLALVNDAPRAASIVLRED--  
-----N-CHFLRVDKEDFNRI-LRDVEANTVRLKEHDQDVLV---  
>Rapgef4\_[*Oryzias latipes*]<sub>765156385</sub>  
ALSHLSTTV---KRELAGVLIFESHAKAGTV---LFNQGDEGTS---WYIILKGSVDVVI  
Y----GKGV-----V-C---T-LHEG-DDFGKLALVNDAPRAASIVLRED--  
-----N-CHFLRVDKEDFNRI-LRDVEANTVRLKEEHGQDVLV---  
>Rapgef4\_[*Otolemur garnettii*]<sub>831228731</sub>  
ALSHLSTTV---KRELAGVLIFESHAKGGTV---LFNQGEEGTS---WYIILKGSVNVVI  
Y----GKGV-----V-C---T-LHEG-DDFGKLALVNDAPRAASIVLRED--  
-----N-CHFLRVDKEDFNRI-LRDVEANTVRLKEHDQDVLV---  
>Rapgef4\_[*Ovis aries musimon*]<sub>803230360</sub>  
ALSHLSTTV---KRELAAVLIFESHAKGGTV---LFNQGEEGTS---WYIILKGSVNVVI  
Y----GKGV-----V-C---T-LHEG-DDFGKLALVNDAPRAASIVLRED--  
-----N-CHFLRVDKEDFNRI-LRDVEANTVRLKEHDQDVLV---  
>Rapgef4\_[*Ovis aries*]<sub>803018389</sub>  
ALSHLSTTV---KRELAAVLIFESHAKGGTV---LFNQGEEGTS---WYIILKGSVNVVI

Y----GKGV-----V-C---T-LHEG-DDFGKLALVNDAPRAASIVLRED--  
-----N-CHFLRVDKEDFNRI-LRDVEANTVRLKEHDQDVLV---  
>Rapgef4\_[Pan\_troglodytes]\_1034150403  
ALSHLSTTV---KRELAGVLIFESHAKGGTV---LFNQGEEGTS---WYIILKGSVNVVI  
Y----GKGV-----V-C---T-LHEG-DDFGKLALVNDAPRAASIVLRED--  
-----N-CHFLRVDKEDFNRI-LRDVEANTVRLKEHDQDVLV---  
>Rapgef4\_[Panthera\_tigris\_altaica]\_987393874  
ALSHLSTTV---KRELAGVLIFESHAKGGTV---LFNQGEEGTS---WYIILKGSVNVVI  
Y----GKGV-----V-C---T-LHEG-DDFGKLALVNDAPRAASIVLRED--  
-----N-CHFLRVDKEDFNRI-LRDVEANTVRLKEHDQDVLV---  
>Rapgef4\_[Pantholops\_hodgsonii]\_556763448  
ALSHLSTTV---KRELA AVLIFESHAKGGTV---LFNQGEEGTS---WYIILKGSVNVVI  
Y----GKGV-----V-C---T-LHEG-DDFGKLALVNDAPRAASIVLRED--  
-----N-CHFLRVDKEDFNRI-LRDVEANTVRLKEHDQDVLV---  
>Rapgef4\_[Papio\_anubis]\_402888642  
ALSHLSTTV---KRELAGVLIFESHAKGGTV---LFNQGEEGTS---WYIILKGSVNVVI  
Y----GKGV-----V-C---T-LHEG-DDFGKLALVNDAPRAASIVLRED--  
-----N-CHFLRVDKEDFNRI-LRDVEANTVRLKEHDQDVLV---  
>Rapgef4\_[Parasteatoda\_tepidariorum]\_1009531414  
ALSHLSNSV---KRELAGVLVFESH PKAGTV---LFNQGDEGKS---WFIILKGAVNVVI  
Y----GKGV-----V-C---S-LHEG-DDFGKLALVNDAPRAATIVTREN--  
-----N-CHFLRVDKDDFNRI-IRDVEANTVRLKEHGQDVLV---  
>Rapgef4\_[Parus\_major]\_998705928  
ALSHLSTTV---KRELAGVLIFESH PKAGTV---LFNQGEEGTS---WYIILKGSVNVVI  
Y----GKGV-----V-C---T-LHEG-DDFGKLALVNDAPRAASIVLRED--  
-----N-CHFLRVDKEDFNRI-LRDVEANTVRLKEHDQDVLV---  
>Rapgef4\_[Pelecanus\_crispus]\_677474558  
ALSHLSTTV---KRELAGVLIFESH PKAGTV---LFNQGEEGTS---WYIILKGSVNVVI  
Y----GKGV-----V-C---T-LHEG-DDFGKLALVNDAPRAASIVLRED--  
-----N-CHFLRVDKEDFNRI-LRDVEANTVRLKEHDQDVLV---  
>Rapgef4\_[Peromyscus\_maniculatus\_bairdii]\_1008739312  
ALSHLSTTV---KRELAGVLIFESHAKGGTV---LFNQGEEGTS---WYIILKGSVNVVI  
Y----GKGV-----V-C---T-LHEG-DDFGKLALVNDAPRAASIVLRED--  
-----N-CHFLRVDKEDFNRI-LRDVEANTVRLKEHDQDVLV---  
>Rapgef4\_[Phaethon\_lepturus]\_723138393  
ALSHLSTTV---KRELAGVLIFESH PKAGTV---LFNQGEEGTS---WYIILKGSVNVVI  
Y----GKGV-----V-C---T-LHEG-DDFGKLALVNDAPRAASIVLRED--  
-----N-CHFLRVDKEDFNRI-LRDVEANTVRLKEHDQDVLV---  
>Rapgef4\_[Phalacrocorax\_carbo]\_695135744  
ALSHLSTTV---KRELAGVLIFESH PKAGTV---LFNQGEEGTS---WYIILKGSVNVVI  
Y----GKGV-----V-C---T-LHEG-DDFGKLALVNDAPRAASIVLRED--  
-----N-CHFLRVDKEDFNRI-LRDVEANTVRLKEHDQDVLV---  
>Rapgef4\_[Physeter\_catodon]\_593753582  
ALSHLSTTV---KRELAGVLIFESHAKGGTV---LFNQGEEGTS---WYIILKGSVNVVI  
Y----GKGV-----V-C---T-LHEG-DDFGKLALVNDAPRAASIVLRED--  
-----N-CHFLRVDKEDFNRI-LRDVEANTVRLKEHDQDVLV---  
>Rapgef4\_[Poecilia\_formosa]\_617381053  
ALSHLSTTV---KRELAGVLIFESHERAGTV---LFHQGEEGTS---WYIILKGSVNVVI  
Y----GKGV-----V-C---T-LYEG-DDFGKLALVNDAPRAASIVLRED--  
-----D-CHFLRVDKEDFNRI-LRDVEANTVRLKEHGQDVLV---  
>Rapgef4\_[Poecilia\_latipinna]\_961931725  
ALSHLSTTV---KRELAGVLIFESHERAGTV---LFHQGEEGTS---WYIILKGSVNVVI  
Y----GKGV-----V-C---T-LYEG-DDFGKLALVNDAPRAASIVLRED--  
-----D-CHFLRVDKEDFNRI-LRDVEANTVRLKEHGQDVLV---

>Rapgef4\_[*Poecilia reticulata*]<sub>1039383673</sub>  
ALSHLSTTV---KRELAGVLIFESHERAGTV---LFHQGEEGTS---WYIILKGSVNVVI  
Y----GKGV-----V-C---T-LHEG-DDFGKLALVNDAPRAASIVLRED--  
-----D-CHFLRVDKEDFNRI-LRDVEANTVRLKEHGQDVLV---  
>Rapgef4\_[*Pongo abelii*]<sub>686709088</sub>  
ALSHLSTTV---KRELAGVLIFESHAKGGTV---LFNQGEEGTS---WYIILKGSVNVVI  
Y----GKGV-----V-C---T-LHEG-DDFGKLALVNDAPRAASIVLRED--  
-----N-CHFLRVDKEDFNRI-LRDVEANTVRLKEHDQDVLV---  
>Rapgef4\_[*Propithecus coquereli*]<sub>826312078</sub>  
ALSHLSTTV---KRELAGVLIFESHAKGGTV---LFNQGEEGTS---WYIILKGSVNVVI  
Y----GKGV-----V-C---T-LHEG-DDFGKLALVNDAPRAASIVLRED--  
-----N-CHFLRVDKEDFNRI-LRDVEANTVRLKEHDQDVLV---  
>Rapgef4\_[*Protobothrops mucrosquamatus*]<sub>1002568461</sub>  
ALSHLSTTV---KRELAGVLVFESHHPKAGTV---LFNQGEEGTS---WYIILKGSVNVVI  
Y----GKGV-----V-C---T-LHEG-DDFGKLALVNDAPRAASIVLREE--  
-----N-CHFLRVDKEDFNRI-LRDVEANTVRLKEHDQDVLV---  
>Rapgef4\_[*Pseudopodoces humilis*]<sub>929420255</sub>  
ALSHLSTTV---KRELAGVLIFESHHPKAGTV---LFNQGEEGTS---WYIILKGSVNVVI  
Y----GKGV-----V-C---T-LHEG-DDFGKLALVNDAPRAASIVLRED--  
-----N-CHFLRVDKEDFNRI-LRDVEANTVRLKEHDQDVLV---  
>Rapgef4\_[*Pterocles gutturalis*]<sub>704489718</sub>  
ALSHLSTTV---KRELAGVLIFESHHPKAGTV---LFNQGEEGTS---WYIILKGSVNVVI  
Y----GKGV-----V-C---T-LHEG-DDFGKLALVNDAPRAASIVLRED--  
-----N-CHFLRVDKEDFNRI-LRDVEANTVRLKEHDQDVLV---  
>Rapgef4\_[*Pteropus alecto*]<sub>586532740</sub>  
ALSHLSTTV---KRELAGVLIFESHAKGGTV---LFNQGEEGTS---WYIILKGSVNVVI  
Y----GKGV-----V-C---T-LHEG-DDFGKLALVNDAPRAASIVLRED--  
-----N-CHFLRVDKEDFNRI-LRDVEANTVRLKEHDQDVLV---  
>Rapgef4\_[*Pundamilia nyererei*]<sub>548342431</sub>  
ALSHLSTTV---KRELAGVLIFESHAKAGTV---LFNQGEEGTS---WYIILKGSVNVVI  
Y----GKGV-----V-C---T-LHEG-DDFGKLALVNDAPRAASIVLRED--  
-----N-CHFLRVDKEDFNRI-LRDVEANTVRLKEHGQDVLV---  
>Rapgef4\_[*Pygoscelis adeliae*]<sub>690425254</sub>  
ALSHLSTTV---KRELAGVLVFESHHPKAGTV---LFNQGEEGTS---WYIILKGSVNVVI  
Y----GKGV-----V-C---T-LHEG-DDFGKLALVNDAPRAASIVLRED--  
-----N-CHFLRVDKEDFNRI-LRDVEANTVRLKEHDQDVLV---  
>Rapgef4\_[*Python bivittatus*]<sub>1004668302</sub>  
ALSHLSTTV---KRELAGVLVFESHHPKAGTV---LFNQGEEGTS---WYIILKGSVNVVI  
Y----GKGV-----V-C---T-LHEG-DDFGKLALVNDAPRAASIVLREE--  
-----N-CHFLRVDKEDFNRI-LRDVEANTVRLKEHNQDVLV---  
>Rapgef4\_[*Rhinopithecus roxellana*]<sub>724894124</sub>  
ALSHLSTTV---KRELAGVLIFESHAKGGTV---LFNQGEEGTS---WYIILKGSVNVVI  
Y----GKGV-----V-C---T-LHEG-DDFGKLALVNDAPRAASIVLRED--  
-----N-CHFLRVDKEDFNRI-LRDVEANTVRLKEHDQDVLV---  
>Rapgef4\_[*Rousettus aegyptiacus*]<sub>1012008359</sub>  
ALSHLSTTV---KRELAGVLIFESHAKGGTV---LFNQGEEGTS---WYIILKGSVNVVI  
Y----GKGV-----V-C---T-LHEG-DDFGKLALVNDAPRAASIVLRED--  
-----N-CHFLRVDKEDFNRI-LRDVEANTVRLKEHDQDVLV---  
>Rapgef4\_[*Saccoglossus kowalevskii*]<sub>585695958</sub>  
ALSHLSTMV---KRELASVLKFESHQKAGTV---LFNQGDEGKS---WYIILRGSVNVVI  
Y----GKGV-----V-C---T-LHEG-DDFGKLALVNDAPRAASIVLRED--  
-----N-CHFLRVDKDDFNRI-LRDVEANTVRLKEHGQDVLV---  
>Rapgef4\_[*Saimiri boliviensis boliviensis*]<sub>403258754</sub>  
ALSHLSTTV---KRELAGVLIFESHAKGGTV---LFNQGEEGTS---WYIILKGSVNVVI

Y----GKGV-----V-C---T-LHEG-DDFGKLALVNDAPRAASIVLRED--  
-----N-CHFLRVDKEDFNRI-LRDVEANTVRLKEHDQDVLV---  
>Rapgef4\_[Salmo\_salar]\_929285053  
ALSHLSTTV---KRELAGVLIFESHAKAGTV---LFNQGEEGTS---WYIILKGSVNVVI  
Y----GKGV-----V-C---T-LHEG-DDFGKLALVNDAPRAASIVLRED--  
-----N-CHFLRVDKEDFNRI-LRDVEANTVRLKEHDQDVLV---  
>Rapgef4\_[Sarcophilus\_harrisii]\_395519780  
ALSHLSTTV---KRELAGVLIFESHAKAGTV---LFNQGEEGTS---WYIILKGSVNVVI  
Y----GKGV-----V-C---T-LHEG-DDFGKLALVNDAPRAASIVLRED--  
-----N-CHFLRVDKEDFNRI-LRDVEANTVRLKEHDQDVLV---  
>Rapgef4\_[Sarcoptes\_scabiei]\_934156037  
AFSHLSNSV---KKELSGVIAFE-SYEQKSTIW-----S-----VNVVI  
A----SKGI-----V-C---T-LHEG-DDFGKLALVNEAPRAATIITNEP--  
-----D-CQFLRVDKVHFDRI-LKDNEASIVRLKECGKEVLI---  
>Rapgef4\_[Schistosoma\_haematobium]\_844834006  
ALSSFSISV---KQELCKCLYYEVHENALDI---VFYQGDPGIS---WYIIYHGSVWVHI  
--NNQGY-----I-C---L-LNEG-DDFGKLSLITDKPRAASILLAEN--  
-----N-CHFLKLNKNDNFNRI-LCNVEANTVHLKNNNSDVLI---  
>Rapgef4\_[Scleropages\_formosus]\_938054751  
ALSHLSTTV---KRELAGVLIFESHAKAGTV---LFNQGEEGTS---WYIILKGSVNVVI  
Y----GKGV-----V-C---T-LHEG-DDFGKLALVNDAPRAASIVLRED--  
-----N-CHFLRVDKEDFNRI-LRDVEANTVRLKEHQDVLV---  
>Rapgef4\_[Sinocyclocheilus\_anhuiensis]\_1025001496  
ALSHLSTTV---KRELAGVLIFESHAKAGTV---LFNQGEEGTS---WYIILKGSINVVI  
Y----GKGV-----V-C---T-LHEG-DDFGKLALVNDAPRAASIVLRED--  
-----N-CHFLRVDKEDFNRI-LRDVEANTVRLKEHEEDVLV---  
>Rapgef4\_[Sinocyclocheilus\_grahami]\_1020426833  
-----EGDDFGKRLQWYIILKGSVNVVI  
Y----GKGV-----V-C---T-LHEG-DDFGKLALVNDAPRAASIVLRED--  
-----N-CHLLRVDKEDFNRI-LRDVEANTVRLKEH-----  
>Rapgef4\_[Sinocyclocheilus\_rhinoceros]\_1025300063  
ALSHLSTTV---KRELAGVLIFESHAKAGTV---LFNQGEEGTS---WYIILKGSINVVI  
Y----GKGV-----V-C---T-LHEG-DDFGKLALVNDAPRAASIVLRED--  
-----N-CHFLRVDKEDFNRI-LRDVEANTVRLKEHEEDVLV---  
>Rapgef4\_[Sorex\_araneus]\_505771640  
ALSHLSTTV---KRELAGVLIFESHAKAGTV---LFNQGEEGTS---WYIILKGSVNVVI  
Y----GKGV-----V-C---T-LHEG-DDFGKLALVNDAPRAASIVLRED--  
-----N-CHFLRVDKEDFNRI-LRDVEANTVRLKEHDQDVLV---  
>Rapgef4\_[Stegodyphus\_mimosarum]\_675363725  
ALSHLSNSV---KRELAGVLVFESHKAGTV---LFNQGDEGKS---WFIIILRGSVNVVI  
Y----GKGI-----V-C---S-LHEG-DDFGKLALVNDAPRAATIITREN--  
-----N-CHFLRVDKEDFNRI-IRDVEANTVRLKEHQDVLV---  
>Rapgef4\_[Strongylocentrotus\_purpuratus]\_390363651  
ALAHLSGMV---KRQLTSVLVFECHEKAGTV---LFHQGDEGRS---WFIIILRGSVNVVK  
Y----GKGV-----V-C---T-LHDG-DDFGKLALVNDAPRAASIVLRED--  
-----N-CQFLRVDKYDFNRI-LRDVEANTVRLKEHQDQSLV---  
>Rapgef4\_[Struthio\_camelus\_australis]\_697502539  
ALSHLSTTV---KRELAGVLIFESHKAGTV---LFNQGEEGTS---WYIILKGSVNVVI  
Y----GKGV-----V-C---T-LHEG-DDFGKLALVNDAPRAASIVLRED--  
-----N-CHFLRVDKEDFNRI-LRDVEANTVRLKEHDQDVLV---  
>Rapgef4\_[Sturnus\_vulgaris]\_959065034  
ALSHLSTTV---KRELAGVLIFESHKAGTV---LFNQGEEGTS---WYIILKGSVNVVI  
Y----GKGV-----V-C---T-LHEG-DDFGKLALVNDAPRAASIVLRED--  
-----N-CHFLRVDKEDFNRI-LRDVEANTVRLKEHDQDVLV---

>Rapgef4\_[Sus\_scrofa]\_927210429  
ALSHLSTTV---KRELAVLIFESHAKGGTV---LFNQGEEGTS---WYIILKGSVNVVI  
Y----GKGV-----V-C---T-LHEG-DDFGKLALVNDAPRAASIVLRED--  
-----N-CHFLRVDKEDFNRI-LRDVEANTVRLKEHDQDVLV---  
>Rapgef4\_[Takifugu\_rubripes]\_410896946  
ALSHLSTTV---KRELAVLIFESHAKAGTV---LFSQGEEGTS---WYIILKGSVNVVI  
Y----GKGV-----V-C---T-LHEG-DDFGKLALVNDAPRAASIVLRED--  
-----N-CHFLRVDKEDFNRI-LRDVEANTVRLKEHGQDVLV---  
>Rapgef4\_[Tinamus\_guttatus]\_719773624  
ALSHLSTTV---KRELAVLIFESHKAGTV---LFNQGEEGTS---WYIILKGSVNVVI  
Y----GKGV-----V-C---T-LHEG-DDFGKLALVNDAPRAASIVLRED--  
-----N-CHFLRVDKEDFNRI-LRDVEANTVRLKEHDQDVLV---  
>Rapgef4\_[Trichechus\_manatus\_latirostris]\_471370093  
ALSHLSTTV---KRDVCGIAIFSSFL---CL---VFNQGEEGTS---WYIILKGSVNVVI  
Y----GKGV-----V-C---T-LHEG-DDFGKLALVNDAPRAASIVLRED--  
-----N-CHFLRVDKEDFNRI-LRDVEANTVRLKEHDQDVLV---  
>Rapgef4\_[Trichinella\_britovi]\_954388359  
ALSNLSTMV---KRELATVIMFEQHQNAGTV---LFRQGDQGKS---WYIILKGSVNVVI  
H----GKGV-----V-C---T-LQEG-DDFGKLALVNDAPRAATIILNEN--  
-----C-CQFLRVDKHDFDRI-LRDVEANTVRLKEHGHDLV---  
>Rapgef4\_[Trichinella\_nativa]\_954534912  
ALSNLSTMV---KRELATVIMFEQHQNAGTV---LFRQGDQGKS---WYIILKGSVNVVI  
H----GKGV-----V-C---T-LQEG-DDFGKLALVNDAPRAATIILNEN--  
-----C-CQFLRVDKHDFDRI-LRDVEANTVRLKEHGHDLV---  
>Rapgef4\_[Trichinella\_papuae]\_954590899  
ALSNLSTMV---KRELATVIMFEQHQNAGTV---LFRQGDQGKS---WYIILKGSVNVVI  
H----GKGV-----V-C---T-LQEG-DDFGKLALVNDAPRAATIILNEN--  
-----C-CQFLRVDKHDFDRI-LRDVEANTVRLKEHGHDLV---  
>Rapgef4\_[Trichinella\_patagoniensis]\_954341164  
ALSNLSTMV---KRELATVIMFEQHQNAGTV---LFRQGDQGKS---WYIILKGSVNVVI  
H----GKGV-----V-C---T-LQEG-DDFGKLALVNDAPRAATIILNEN--  
-----C-CQFLRVDKHDFDRI-LRDVEANTVRLKEHGHDLV---  
>Rapgef4\_[Trichinella\_sp.\_T6]\_954280927  
ALSNLSTMV---KRELATVIMFEQHQNAGTV---LFRQGDQGKS---WYIILKGSVNVVI  
H----GKGV-----V-C---T-LQEG-DDFGKLALVNDAPRAATIILNEN--  
-----C-CQFLRVDKHDFDRI-LRDVEANTVRLKEHGHDLV---  
>Rapgef4\_[Trichinella\_sp.\_T8]\_954617710  
ALSNLSTMV---KRELATVIMFEQHQNAGTV---LFRQGDQGKS---WYIILKGSVNVVI  
H----GKGV-----V-C---T-LQEG-DDFGKLALVNDAPRAATIILNEN--  
-----C-CQFLRVDKHDFDRI-LRDVEANTVRLKEHGHDLV---  
>Rapgef4\_[Trichinella\_spiralis]\_954362209  
ALSNLSTMV---KRELATVIMFEQHQNAGTV---LFRQGDQGKS---WYIILKGSVNVVI  
H----GKGV-----V-C---T-LQEG-DDFGKLALVNDAPRAATIILNEN--  
-----C-CQFLRVDKHDFDRI-LRDVEANTVRLKEHGHDLV---  
>Rapgef4\_[Trichinella\_zimbabwensis]\_954489457  
ALSNLSTMV---KRELATVIMFEQHQNAGTV---LFRQGDQGKS---WYIILKGSVNVVI  
H----GKGV-----V-C---T-LQEG-DDFGKLALVNDAPRAATIILNEN--  
-----C-CQFLRVDKHDFDRI-LRDVEANTVRLKEHGHDLV---  
>Rapgef4\_[Tupaia\_chinensis]\_562844419  
ALSHLSTTV---KRELAVLVFESHAKGGTV---LFNQGEEGTS---WYIILKGSVNVVI  
Y----GKGV-----V-C---T-LHEG-DDFGKLALVNDAPRAASIVLRED--  
-----N-CHFLRVDKEDFNRI-LRDVEANTVRLKEHDQDVLV---  
>Rapgef4\_[Tursiops\_truncatus]\_470618433  
-----GIT---LFRQGDIGTN---WYAVLAGSLDVKV

```

--SETSSH----QDA-----VTI-C---T-LGIG-TAFGE-SILDNTPRHATIVTRE---
-----S-SELLRIEQKDF-----
>Rapgef4_[Tyto_alba]_678181601
ALSHLSTTV---KRELAGVLIFESHHPKAGTV---LFNQGEEGTS---WYIILKGSVNVVI
Y----GKGV-----V-C---T-LHEG-DDFGKLALVNDAPRAASIVLRED--
-----N-CHFLRVDKEDFNRI-LRDVEANTVRLKEHDQDVLV---
>Rapgef4_[Ursus_maritimus]_670988645
ALSHLSTTV---KRELAGVLIFESHAKGGTV---LFNQGEEGTS---WYIILKGSVNVVI
Y----GKGV-----V-C---T-LHEG-DDFGKLALVNDAPRAASIVLRED--
-----N-CHFLRVDKEDFNRI-LRDVEANTVRLKEHDQDVLV---
>Rapgef4_[Vicugna_pacos]_560983554
ALSHLSTTV---KRELAGVLIFESHAKGGTV---LFNQGEEGTS---WYIILKGSVNVVI
Y----GKGV-----V-C---T-LHEG-DDFGKLALVNDAPRAASIVLRED--
-----N-CHFLRVDKEDFNRI-LRDVEANTVRLKEHDQDVLV---
>Rapgef4_[Xenopus_tropicalis]_512866132
ALSHLSTTV---KRELAGVLIFESHHPKAGTV---LFNQGEEGTS---WYIILKGSVNVVI
Y----GKGV-----V-C---T-LHEG-DDFGKLALVNDAPRAASIVLRED--
-----N-CHFLRVDKEDFNRI-LRDVEANTVRLKEHDQDVLV---
>Rapgef4_[Xiphophorus_maculatus]_941779216
ALSHLSTTV---KRELAGVLIFESHERAGTV---LFHQGEEGTS---WYIILKGSVNVVI
Y----GKGV-----V-C---T-LHEG-DDFGKLALVNDAPRAASIVLRED--
-----D-CHFLRVDKEDFNRI-LRDVEANTVRLKEHQDVLV---
>Rapgef4_[Zonotrichia_albicollis]_929451867
ALSHLSTTV---KRELAGVLIFESHHPKAGTV---LFNQGEEGTS---WYIILKGSVNVVI
Y----GKGV-----V-C---T-LHEG-DDFGKLALVNDAPRAASIVLRED--
-----N-CHFLRVDKEDFNRI-LRDVEANTVRLKEHDQDVLV---
>Rapgef4_[Zootermopsis_nevadensis]_646703516
ALSHLSNSV---KRELAAVIVFEAHPHAGTV---LFNQGDEGRS---WYIILRGSDVVI
H----GKGT-----V-T---T-LQEG-DDFGKLALINDAPRAATIVLREN--
-----N-CHFLRVDKENFNRI-LRDVEANTVRLKEHQDVLV---
>Rapgef5_[Acinonyx_jubatus]_961711358
-LARLTSÄV---QRELA-AVIALKARKSAIE-----QDEDNGD---KHVIVAEAEAGV--
---PDSQA-----G-----VMCK-----LQER-DDIGRIELVQKLARE-----
-----N-CQFLQTDKKEQEKSEHLDEEVATVQVKEQERNVLV---
>Rapgef5_[Ailuropoda_melanoleuca]_752425000
-LARLTSÄV---QRELA-AVIALKARKSAIE-----QDEENGD---KHVIVTEAGGV--
---PDSQA-----G-----VMCK-----LQER-DDIGRIELVQKLARE-----
-----N-CQFLQTDKKEQEKSEHQDDEVTTVQVKEQEQNVLV---
>Rapgef5_[Balaenoptera_acutorostrata_scammoni]_594672128
-LCRLTSÄV---QRELA-AVIALKARKSAIE-----QDEENSD---KHVTVTEAAGV--
---ADPQA-----G-----VICK-----LQER-DDIGRIELVQKLARE-----
-----N-CQFLQTDKKEQEKSEHQDDEVTTVQVKEQDRDVLV---
>Rapgef5_[Bison_bison_bison]_742114507
-LARLTSÄV---QRELA-AVIALKARKSALA-----QDEENSD---KHVTVTEAEAA--
---ADPQA-----G-----MMCK-----LQER-DDIGRIELVQKLARE-----
-----S-CQFLQTDKKEQEKSEH-DDEVTMVEVKEQDQNVLV---
>Rapgef5_[Carlito_syricha]_640775670
-LARLTSÄV---QRELA-AVIALKARKSALE-----QDEENND---KHVTVTEADGI--
---PDSQA-----G-----VMCK-----LQER-DDIGRIELVQKLARE-----
-----N-YQFLQSDKKEQEKSEHQDDEVATVQVKEQDRSVLV---
>Rapgef5_[Ceratotherium_simum_simum]_478489217
-LARLTSÄV---QRELA-AVIALKARKSAID-----QDEENSD---KHVTVTEAESV--
---PDSQA-----G-----VMCK-----LQER-DDIGRIELVQKLARE-----
-----N-CQFLQTDKKEQEKSEHQDDEVTVRVKEQERNVLV---

```



>Rapgef5\_[Chinchilla\_lanigera]\_533124335  
-LARLTSAV---QRELA-AVIALKARKSALE-----QDDEDND---KHVPVTEAEGV--  
---PDSQA-----G-----VMCK-----LQER-DDIGRIELVQKLARE-----  
-----N-CQFLQTDKKELEKSEHQ-DEVTTTLQVKEQDQTVLV---  
>Rapgef5\_[Chrysemys\_picta\_bellii]\_641751788  
-----G-----VLCK-----LQER-DDIGRIELVQKLARE-----  
-----N-CQFLQVDRKEPEKTE-QNDEVSTIEVKEQDQDVLV---  
>Rapgef5\_[Chrysochloris\_asiatica]\_586448209  
-LARLTSAM---QRELA-AVIALKARKSAVE-----QDEETGD---QHVALIEAEGV--  
---PESQA-----G-----VMCK-----LQER-DDIGRIELVQKLARE-----  
-----N-CQLLQTDKKEQEKSEHQEDEVTTTVQVKEQDQNVLV---  
>Rapgef5\_[Dasypus\_novemcinctus]\_488539542  
-LARLTSAV---QRELA-AVIALKARKSAIE-----QEEENSND---KHVAVTETEGV--  
---PESQA-----G-----VMCK-----LHER-DDIGRIELVQKLARE-----  
-----N-CQFLQTDKKEQEKSEHQDDDLTTVQVKEQDQSVLV---  
>Rapgef5\_[Echinops\_telfairi]\_850284753  
-LARLTSAV---QRELA-AVIALKARKSALE-----QEEESGD---KHIAGTEAEGV--  
---PESQA-----G-----VMCK-----LHER-DDLGRIELVQKLARE-----  
-----N-CHLLQTDKRKEHEKSEHPDEVSTIQVKEQDRDVLV---  
>Rapgef5\_[Equus\_asinus]\_958806827  
-LARLTSAV---QRELA-AVIALKARKSALE-----QDEENSND---KHVTVTEAEGV--  
---PDSQA-----G-----VMCK-----LQER-DDIGRIELVQKLARE-----  
-----N-CQFLQTDKKEQEKSEHQDDEVTTTVQVKDQEQNVLV---  
>Rapgef5\_[Equus\_caballus]\_194209713  
-LARLTSAV---QRELA-AVIALKARKSALE-----QDEENSND---KHVTVTEAEGV--  
---PDSQA-----G-----VMCK-----LQER-DDIGRIELVQKLARE-----  
-----N-CQFLQTDKKEQEKSEHQDDEVMTVQVKEQEQNVLV---  
>Rapgef5\_[Equus\_przewalskii]\_664704332  
-LARLTSAV---QRELA-AVIALKARKSALE-----QDEENSV---KHVTVTEAEGV--  
---PDSQA-----G-----VMCK-----LQER-DDIGRIELVQKLARE-----  
-----N-CQFLQTDKKEQEKSEHQDDEVMTVQVKEQEQNVLV---  
>Rapgef5\_[Erinaceus\_europaeus]\_1016649020  
-LARLTSAV---QRELA-AVIALKARKSALE-----QDEENSND---KHVPVTEAGGV--  
---PDSKA-----G-----VMCK-----LQER-DDTGKIELVQKLARE-----  
-----N-CQILQMDKKEQEKSEHQDDEVTTVGVKEQNNQNVLV---  
>Rapgef5\_[Felis\_catus]\_755702256  
-LARLTSAV---QRELA-AVIALKARKSAIE-----QDEDNGD---KHVIVAEAEGV--  
---PDSQA-----G-----VMCK-----LQER-DDIGRIELVQKL TRE-----  
-----N-CQFLQTDKKEQEKSEHLDDEVATVQVKEQERNVLV---  
>Rapgef5\_[Leptonychotes\_weddellii]\_585182469  
-LARLTSAV---QRELA-AVIALKARKSAIE-----QDEENRD---KHVIVTEAGGV--  
---PDSQA-----G-----VMCK-----LQER-DDIGRIELVQKLARE-----  
-----N-CQFLQTDKKEQEKSEHQDDEVRTVQVKEQEHNVLV---  
>Rapgef5\_[Loxodonta\_africana]\_731461513  
-LARLTSAV---QRELA-AVIALKARKSAIE-----QDEENSND---KHIAVPEAEGV--  
---PQSQA-----G-----VMCK-----LQER-DDIGRIELVQKLARE-----  
-----N-CQLLQTDKKELEKSEHQDDEVTTTVQVKEQDQNVLV---  
>Rapgef5\_[Mus\_musculus]\_568979472  
-LARLTSAV---QRELA-AVIALKARKSAIE-----QDDENAD---KHVTVTEANNG--  
---PDPQA-----G-----VMCK-----LQER-DDIGRIELVHKLARE-----  
-----N-CQFLQTEKKESEKLEQQDDEVMTMVQVKEQGQSVLV---  
>Rapgef5\_[Odobenus\_rosmarus\_divergens]\_472355446  
-LARLTSAV---QRELA-AVIALKARKSAVE-----QDEENSND---KHDIIVTEAGGV--

```

---PDSQA-----G-----VMCK-----LQER-DDIGRIELVQKLARE-----
-----N-CQFLQTDKKEQEKSEHQDDEVRTVRVKEQEHNVLV---
>Rapgef5_[Orcinus_orca]_465971427
-LCRLTSAV---QRELA-AVIALKARKSAIE-----QDENSD---KHVTVTEAEGV--
---ADPQA-----G-----VICK-----LQER-DDIGRIELVQKLARE-----
-----N-CQFLQTDKKEQEKSEHQDDEVTTVQVKEQDRDVLV---
>Rapgef5_[Panthera_tigris_altaica]_987416040
-LARLTSaV---QRELA-AVIALKARKSAIE-----QDEDNGD---KHVIVAEAEAGV--
---PDSQA-----G-----VMCK-----LQER-DDIGRIELVQKLARE-----
-----N-CQFLQTDKKEQEKSEHLDEEVATVQVKEQERNVLV---
>Rapgef5_[Peromyscus_maniculatus_bairdii]_1008780728
-LARLTSaV---QRELA-AVIALKARKSAVE-----QDDENAD---KHIAVTEANDG--
---PDPQA-----G-----VMCK-----LQER-DDIGRIELVQKLARE-----
-----N-CQFLQTDKKEPEKSEQQDDEVTTVQVKEQGQSVLV---
>Rapgef5_[Physeter_catodon]_593712772
-LCRLTSAV---QRELA-AVIALKARKSAVE-----QDENSD---KHVTVTEAEGV--
---ADPQA-----G-----VICK-----LQER-DDIGRIELVQKLARE-----
-----N-CQFLQTDKKEQEKSEHQDDEVTTVQVKEQDRDVLV---
>Rapgef5_[Pteropus_vampyrus]_759124282
-LARLTSaV---QRELA-AVIALKAKKSAMA-----QDENSD---KHVTVTEAEGV--
---PDSQA-----G-----VMCK-----LQER-DDMGRIELVQKLARE-----
-----N-CQFLQTEKKEREKSEHQDDEVTTVQ--EQEQDVLV---
>Rapgef5_[Rousettus_aegyptiacus]_1012209897
-LARLTSaV---QRELA-AVIALKAKKSALE-----QDEDNSE---KHVTVAEAGGA--
---PDSQA-----G-----VMCK-----LQER-DDIGRIELVQKLARE-----
-----N-CQFLQTEKKEREKSEH-DDEVTTVQ--EQEQDVLV---
>Rapgef5_[Sorex_araneus]_836703300
-LARLTSaM---QRELA-AVIALKARKSALE-----QDEENSE---KHVPGTEGENV--
---LDSRA-----G-----VMCK-----LQER-DDIGRIELVQKLARD-----
-----N-CQCLQTEKKEQEKSEQQDEEAPRVQVREQEENVLV---
>Rapgef5_[Sus_scrofa]_927180328
-LARLTSaV---QRELA-AVIALKAKKSAIE-----QDEDNSD---KRETVTEADCI--
---PDPQA-----G-----VMCK-----LQER-DDIGRIELVQKLARE-----
-----N-CQFLQTDKKEQEKSDNQDDEVTTVQVKEQDRNVLV---
>Rapgef5_[Trichechus_manatus_latirostris]_471379407
-LARLTSaM---QRELA-AVIALKARKSAIE-----QDENSD---KHIAVPEAEDG--
---PESQA-----G-----VMCK-----LQER-DDIGRIELVQKLARE-----
-----N-CQLLQTDKKEQEKSEHQDDEVTTVQVTEQDQNVLV---
>Rapgef5_[Ursus_maritimus]_670987468
-LARLTSaV---QRELA-AVIALKARKSAIE-----QDENSD---KHVIVTEAGGV--
---PDSQA-----G-----VMCK-----LQER-DDIGRIELVQKLARE-----
-----N-CQFLQTDKKEQEKSEHQDDEVTTVQVKEQERNVLV---
>Rapgef5_[Vicugna_pacos]_970711077
-LARLTSaV---QRELA-AVIALKARKSAVE-----RDEDNNG---KHVTVTEAEGV--
---PGPQA-----G-----VMCK-----LQEK-DDIGRIELVQKLARE-----
-----N-CQCLQTDKKEQEKSEHQDDEVTTIQVKEQDQNVLV---
>Rapgef6_[Acanthisitta_chloris]_678007447
AFANMTMSV---RRELCSVMIFEVVEQAGAI---ILEDGQELDS---WYVILNGTVEISY
---PDGK-----S-E---S-LCMG-NSFGITPSLDKQYMNGVVRTKVD---
-----D-CQFVCIAQQDYWRI-LNHVEKNTHKVEE-EGEIV---
>Rapgef6_[Acinonyx_jubatus]_961725169
AFANMTMSV---RRELCSVMIFEVVEQAGAV---ILEDGQELDS---WYVILNGTVEITH
---PDGK-----V-E---N-LFMG-NSFGITPTLDKQYMHGVVVRTKVD---
-----D-CQFVCIAQQDYWRI-LNHVEKNTHKVEE-EGEIV---

```

>Rapgef6\_[Acromyrmex\_echinatior]\_746838626  
 AFTNMTLAV---RRALCAVMVFAVVDRAGMV---VLNDGEELDS---WSVLINGAVEIEH  
 ---SNGE-----I-E---Q-LGLG-DSFGILPTMERLLHRGVMRTKCD--  
 -----D-CQFVCVTQADYFRI-QHQGEENTRRHE-ENGRVI-----  
 >Rapgef6\_[Ailuropoda\_melanoleuca]\_301782691  
 AFANMTMSV---RRELCSVMIFEVVEQAGAI---ILEDGQELDS---WYVILNGTVEITH  
 ---PDGK-----V-E---N-LFMG-NSFGITPTLDKQYMHGVIRTKVD--  
 -----D-CQFVCIAQQDYWRI-LNHVEKNTHKVEE-EGEIV-----  
 >Rapgef6\_[Alligator\_mississippiensis]\_950961539  
 AFANMTMSV---RRELCSVMIFEVVEQAGAI---ILEDGQELDS---WYVILNGTVEISY  
 ---PDGK-----T-E---N-LCMG-NSFGITPSLEKQYMNGVVRTKVD--  
 -----D-CQFVCIAQQDYWRI-LNHVEKNTHKVEE-EGEIV-----  
 >Rapgef6\_[Anolis\_carolinensis]\_637269198  
 AFANMTMSV---RRELCSVMIFEVVEQAGAI---ILEDGQELDS---WYVILNGTVEISH  
 ---PDGK-----T-E---S-LCMG-NSFGITPSLEKQYMNGVVRTKVD--  
 -----D-CQFVCIAQQDYWRI-LNHVEKNTHKVEE-EGEIV-----  
 >Rapgef6\_[Anser\_cygnoides\_domesticus]\_902883087  
 AFANMTMSV---RRELCSVMIFEVVEQAGAI---ILEDGQELDS---WYVILNGTVEISY  
 ---PDGK-----S-E---S-LCMG-NSFGITPSLEKQYMNGVVRTKVD--  
 -----D-CQFVCIAQQDYWRI-LNHVEKNTHKVEE-EGEIV-----  
 >Rapgef6\_[Aotus\_nancymae]\_817253569  
 AFANMTMSV---RRELCSVMIFEVVEQAGAV---ILEDGQELDS---WYVILNGTVEISH  
 ---PDGK-----V-E---N-LFMG-NSFGITPTLDKQYMHGIVRTKVD--  
 -----D-CQFVCIAQQDYWRI-LNHVEKNTHKVEE-EGEIV-----  
 >Rapgef6\_[Apis\_cerana]\_1035602523  
 AFTNMTLAV---RRALCAVMVFAVVERAGMI---VLNDGEELDS---WSVLINGAVEIEH  
 ---SNGE-----I-E---Q-LHLG-DSFGILPTMERLLHRGVMRTKCD--  
 -----D-CQFVCVTQADYFRI-QHQGEENTRRHE-ENGRVI-----  
 >Rapgef6\_[Apis\_florea]\_820851405  
 AFTNMTLAV---RRALCAVMVFAVVERAGMI---VLNDGEELDS---WSVLINGAVEIEH  
 ---SNGE-----I-E---Q-LHLG-DSFGILPTMERLLHRGVMRTKCD--  
 -----D-CQFVCVTQADYFRI-QHQGEENTRRHE-ENGRVI-----  
 >Rapgef6\_[Aptenodytes\_forsteri]\_686614740  
 AFANMTMSV---RRELCSVMIFEVVEQAGAI---ILEDGQELDS---WYVILNGTVEITY  
 ---PDGK-----S-E---S-LCMG-NSFGITPSLDKQYMNGVVRTKVD--  
 -----D-CQFVCIAQQDYWRI-LNHVEKNTHKVEE-EGEIV-----  
 >Rapgef6\_[Aquila\_chrysaetos\_canadensis]\_768345498  
 AFANMTMSV---RRELCSVMIFEVVEQAGAI---ILEDGQELDS---WYVILNGTVEISY  
 ---PDGK-----S-E---S-LCMG-NSFGITPSLDKQYMNGVVRTKVD--  
 -----D-CQFVCIAQQDYWRI-LNHVEKNTHKVEE-EGEIV-----  
 >Rapgef6\_[Athalia\_rosae]\_817056259  
 AFTNMTLAV---RRALCAVMVFAVVERAGMV---VLNDGEELDS---WSVLINGEVEVEH  
 ---SNGE-----V-E---Q-LTMG-DSFGILPTMERLLHQGVMRTKCD--  
 -----D-CQFVCVTQADYFQI-QSQGEENTRRHE-ENGRVI-----  
 >Rapgef6\_[Balaenoptera\_acutorostrata\_scammoni]\_594681834  
 AFANMTMSV---RRELCSVMIFEVVEQAGAI---ILEDGQELDS---WYVILNGTVEISH  
 ---PDGK-----V-E---N-LFMG-NSFGITPTLDKQYMHGVVRTKVD--  
 -----D-CQFVCIAQQDYWRI-LNHVEKNTHKVEE-EGEIV-----  
 >Rapgef6\_[Balearica\_regulorum\_gibbericeps]\_723546616  
 AFANMTMSV---RRELCSVMIFEVVEQAGAI---ILEDGQELDS---WYVILNGTVEISY  
 ---PDGK-----S-E---S-LCMG-NSFGITPSLDKQYMNGVVRTKVD--  
 -----D-CQFVCIAQQDYWRI-LNHVEKNTHKVEE-EGEIV-----  
 >Rapgef6\_[Bison\_bison\_bison]\_742217352  
 AFANMTMSV---RRELCSVMIFEVVEQAGAV---ILEDGQELDS---WYVILNGTVEISH

---PDGK-----V-D---N-LFMG-NSFGITPTLDKQYMHGVVVRTKVD--  
-----D-CQFVCIAQQDYWRI-LNHVEKNTHKVEE-EGEIV-----  
>Rapgef6\_[Bos\_mutus]\_440912203  
AFANMTMSV---RRELCSVMIFEVVEQAGAV---ILEDGQELDS---WYVILNGTVEISH  
---PDGK-----V-D---N-LFMG-NSFGITPTLDKQYMHGVVVRTKVD--  
-----D-CQFVCIAQQDYWRI-LNHVEKNTHKVEE-EGEIV-----  
>Rapgef6\_[Bos\_taurus]\_359067234  
AFANMTMSV---RRELCSVMIFEVVEQAGAV---ILEDGQELDS---WYVILNGTVEISH  
---PDGK-----V-D---N-LFMG-NSFGITPTLDKQYMHGVVVRTKVD--  
-----D-CQFVCIAQQDYWRI-LNHVEKNTHKVEE-EGEIV-----  
>Rapgef6\_[Buceros\_rhinoceros\_silvestris]\_676722949  
AFANMTMSV---RRELCSVMIFEVVEQAGAI---ILEDGQELDS---WYVILNGTVEISY  
---PDGK-----S-E---S-LCMG-NSFGITPSLEKQYMNGVVVRTKVD--  
-----D-CQFVCIAQQDYWRI-LNHVEKNTHKVEE-EGEIV-----  
>Rapgef6\_[Callithrix\_jacchus]\_675644732  
AFANMTMSV---RRELCSVMIFEVVEQAGAV---ILEDGQELDS---WYVILNGTVEISH  
---PDGK-----V-E---N-LFMG-NSFGITPTLDKQYMHGIVVRTKVD--  
-----D-CQFVCIAQQDYWRI-LNHVEKNTHKVEE-EGEIV-----  
>Rapgef6\_[Callorhinchus\_milii]\_632966528  
AFANMTMFV---RRELCSVMIFEVVEHAGAI---IIDEGKELES---WYVILNGSVEITD  
---SSSR-----I-E---I-LCMG-NSFGILPSLEKQYMHGAVVRTKTD--  
-----D-CQFVSIAQQDYCRI-LNQVEKNTHKVEE-EGEIVMV--  
>Rapgef6\_[Camelus\_ferus]\_560915805  
AFANMTMSV---RRELCSVMIFEVVEQAGAV---ILEDGQELDS---WYVILNGTVEISH  
---PDGK-----V-E---N-LFMG-NSFGITPTLDKQYMRGVVVRTKVD--  
-----D-CQFVCIAQQDYWRI-LNHVEKNTHKVEE-EGEIV-----  
>Rapgef6\_[Capra\_hircus]\_548473191  
AFANMTMSV---RRELCSVMIFEVVEQAGAV---ILEDGQELDS---WYVILNGTVEISY  
---PDGK-----V-D---N-LFMG-NSFGITPTLDKQYMHGVVVRTKVD--  
-----D-CQFVCIAQQDYWRI-LNHVEKNTHKVEE-KGEIV-----  
>Rapgef6\_[Caprimulgus\_carolinensis]\_683447165  
AFANMTMSV---RRELCSVMIFEVVEQAGAI---ILEDGQELDS---WYVILNGTVEISY  
---PDGK-----S-E---S-LCMG-NSFGITPSLDKQYMNGVVVRTKVD--  
-----D-CQFVCIAQQDYWRI-LNHVEKNTHKVEE-EGEIV-----  
>Rapgef6\_[Cariama\_cristata]\_698452567  
AFANMTMSV---RRELCSVMIFEVVEQAGAI---ILEDGQELDS---WYVILNGTVEISY  
---PDGK-----S-E---S-LCMG-NSFGITPSLDKQYMNGVVVRTKVD--  
-----D-CQFVCIAQQDYWRI-LNHVEKNTHKVEE-EGEIV-----  
>Rapgef6\_[Carlito\_syrichta]\_640806927  
AFTNMTMSV---RRELCSVMIFEVVEQAGAI---ILEDGQELDS---WYVILNGTVEISH  
---PDGK-----I-E---N-LFMG-NSFGITPTLDKQYMHGIVVRTKVD--  
-----D-CQFVCIAQQDYWRI-LNHVEKNTHKVEE-EGEIV-----  
>Rapgef6\_[Cathartes\_aura]\_677228612  
AFANMTMSV---RRELCSVMIFEVVEQAGAI---ILEDGQELDS---WYVILNGTVEISY  
---PDGK-----S-E---S-LCMG-NSFGITPSLDKQYMNGVVVRTKVD--  
-----D-CQFVCIAQQDYWRI-LNHVEKNTHKVEE-EGEIV-----  
>Rapgef6\_[Cebus\_capucinus\_imitator]\_1044364594  
AFANMTMSV---RRELCSVMIFEVVEQAGAV---ILEDGQELDS---WYVILNGTVEISH  
---PDGK-----V-E---N-LFMG-NSFGITPTLDKQYMHGIVVRTKVD--  
-----D-CQFVCIAQQDYWRI-LNHVEKNTHKVEE-EGEIV-----  
>Rapgef6\_[Cephus\_cinctus]\_1000734963  
AFTNMTLAV---RRALCAVMVFAVVERAGMV---VLNDGEELDS---WSVLINGAVEVEH  
---SNGE-----V-E---Q-LHLG-DSFGILPTMERLLHRGIMRTKCD--  
-----D-CQFVCVTQADYFRI-QHQGEENTRRHE-ENGRVI-----

>Rapgef6\_[Ceratotherium\_simum\_simum]\_478491851  
AFANMTMSV---RRELCSVMIFEVVEQAGAV---ILEDGQELDS---WYVILNGTVEISH  
---PDGK-----V-E---N-LFMG-NSFGITPTLDKQYMHGVVVRTKVD--  
-----D-CQFVCIAQQDYWRI-LNHVEKNTHKVEE-EGEIV-----  
>Rapgef6\_[Cercopithecus\_atys]\_795413582  
AFANMTMSV---RRELCSVMIFEVVEQAGAI---ILEDGQELDS---WYVILNGTVEISH  
---PDGK-----V-E---N-LFMG-NSFGITPTLDKQYMHGIVVRTKVD--  
-----D-CQFVCIAQQDYWRI-LNHVEKNTHKVEE-EGEIV-----  
>Rapgef6\_[Chaetura\_pelagica]\_701407210  
AFANMTMSV---RRELCSVMIFEVVEQAGAI---ILEDGQELDS---WYVILNGTVEISY  
---PDGK-----S-E---S-LCMG-NSFGITPSLDKQYMNGVVVRTKVD--  
-----D-CQFVCIAQQDYWRI-LNHVEKNTHKVEE-EGEIV-----  
>Rapgef6\_[Chlamydotis\_macqueenii]\_705691314  
AFANMTMSV---RRELCSVMIFEVVEQAGAI---ILEDGQELDS---WYVILNGTVEISY  
---PDGK-----T-E---S-LCMG-NSFGITPSLDKQYMNGVVVRTKVD--  
-----D-CQFVCIAQQDYWRI-LNHVEKNTHKVEE-EGEIV-----  
>Rapgef6\_[Chlorocebus\_sabaeus]\_635123469  
AFANMTMSV---RRELCSVMIFEVVEQAGAI---ILEDGQELDS---WYVILNGTVEISH  
---PDGK-----V-E---N-LFMG-NSFGITPTLDKQYMHGIVVRTKVD--  
-----D-CQFVCIAQQDYWRI-LNHVEKNTHKVEE-EGEIV-----  
>Rapgef6\_[Chrysemys\_picta\_bellii]\_530612721  
AFANMTMSV---RRELCSVMIFEVVEQAGAI---ILEDGQELDS---WYVILNGTVEISH  
---PDGK-----T-E---S-LCMG-NSFGITPSLDKQYMNGVVVRTKVD--  
-----D-CQFVCIAQQDYWRI-LNHVEKNTHKVEE-EGEIV-----  
>Rapgef6\_[Chrysochloris\_asiatica]\_586485010  
AFANMTMSV---RRELCSVMIFEVVEQAGAI---ILEDGEELDS---WYVILNGTVEISH  
---PDGK-----I-E---N-LFMG-NSFGITPTLDKQYMHGVVVRTKVD--  
-----D-CQFVCIAQQDYWRI-LNHVEKNTHKVEE-EGEIV-----  
>Rapgef6\_[Colobus\_angolensis\_palliatus]\_795224884  
AFANMTMSV---RRELCSVMIFEVVEQAGAI---ILEDGQELDS---WYVILNGTVEISH  
---PDGK-----V-E---N-LFMG-NSFGITPTLDKQYMHGIVVRTKVD--  
-----D-CQFVCIAQQDYWRI-LNHVEKNTHKVEE-EGEIV-----  
>Rapgef6\_[Columba\_livia]\_915537474  
AFANMTMSV---RRELCSVMIFEVVEQAGAI---ILEDGQELDS---WYVILNGTVEISY  
---PDGK-----S-E---S-LCMG-NSFGITPSLDKQYMNGVVVRTKVD--  
-----D-CQFVCIAQQDYWRI-LNHVEKNTHKVEE-EGEIV-----  
>Rapgef6\_[Condylura\_cristata]\_507959751  
AFANMTMSV---RRELCSVMIFEVVEQAGAV---ILEDGQELDS---WYVILNGTVEISH  
---PDGK-----V-E---N-LFMG-NSFGITPTLDKQYMRGVVVRTKVD--  
-----D-CQFVCIAQQDYWRI-LNHVEKNTHKVEE-EGEIV-----  
>Rapgef6\_[Corvus\_cornix\_cornix]\_726993272  
AFANMTMSV---RRELCSVMIFEVVEQAGAI---ILEDGQELDS---WYVILNGTVEISY  
---PDGK-----S-E---S-LCMG-NSFGITPSLDKQYMNGVVVRTKVD--  
-----D-CQFVCIAQQDYWRI-LNHVEKNTHKVEE-EGEIV-----  
>Rapgef6\_[Crassostrea\_gigas]\_762094130  
AFANMTQPI---RRELCAVMVFAVIEQRGTV---VMKDGEELDS---WSVILNGQVEIVH  
---PEGS-----A-E---F-LQMG-DSFGISPTLDKMYHKGTMKTLLD--  
-----D-CQFVCIAQEDYHRI-LDKGKENTEKHVE-EGQVV-----  
>Rapgef6\_[Cynoglossus\_semilaevis]\_1035260107  
AFANMTMSV---RRDLCSVMVFEVVEQAGTV---ILHDKQELDL---WYVILNGAVEISH  
---QEGR-----V-E---V-LCMG-NSFGISPSLDKQYMNGEVVRTKGD--  
-----D-CQFVCIAQEDYHRI-LNHVEKNMHHKVEE-EGEIVMV--  
>Rapgef6\_[Cyprinodon\_variegatus]\_974056205  
AFANMTMSV---RRELCSVMVFEVVEQSGTI---ILHNKQELDH---WYVILNGAVEISH

---PEAR-----T-E---T-LCMG-NSFGISPSLDKQYMNGEVRTKGD--  
-----D-CQFVCIAQEDYWRI-LNHVEKNTHKVEE-EGEIV-----  
>Rapgef6\_[Daphnia\_magna]\_1022775171  
AFANMTLSV---RRALCRVMVFAVVEKAGTV---VMNDGEELDS---WSVIINGHVEIDG  
G--ASGE-----P-G---RALHLG-DSFGITPTMDKLYHRGVMRTKCD--  
-----D-CQFVCITQTDYFSI-LHKGEENTRRHEE-NGRVV-----  
>Rapgef6\_[Echinops\_telfairi]\_507622381  
AFANMTMSV---RRELCSVMIFEVVEQAGAV---ILEDGEELDS---WYVILNGTVEISH  
---SGGK-----I-E---N-LFMG-NSFGITPTLDKQYMHGVVVRTKVD--  
-----D-CQFVCIAQQDYWRI-LNHVEKNTHKVEE-EGEIV-----  
>Rapgef6\_[Egretta\_garzetta]\_697849644  
AFANMTMSV---RRELCSVMIFEVVEQAGAI---ILEDGQELDS---WYVILNGTVEISY  
---PDGK-----S-E---S-LCMG-NSFGITPSLDKQYMNGVVVRTKVD--  
-----D-CQFVCIAQQDYWRI-LNHVEKNTHKVEE-EGEIV-----  
>Rapgef6\_[Elephantulus\_edwardii]\_585707696  
AFANMTMSV---RRELCSVMIFEVVEQAGAI---ILEDGEELDS---WYVILNGTVEISH  
---PDGK-----I-E---N-LFMG-NSFGITPTLDKQYMHGVVVRTKVD--  
-----D-CQFVCIAQQDYWRI-LNHVEKNTHKVEE-EGEIV-----  
>Rapgef6\_[Equus\_asinus]\_958795644  
AFANMTMSV---RRELCSVMIFEVVEQAGAI---ILEDGQELDS---WYVILNGTVEIIH  
---PDGK-----V-E---N-LFMG-NSFGITPTLDKQYMHGVVVRTKVD--  
-----D-CQFVCIAQQDYWRI-LNHVEKNTHKVEE-EGEIV-----  
>Rapgef6\_[Equus\_caballus]\_545185041  
AFANMTMSV---RRELCSVMIFEVVEQAGAI---ILEDGQELDS---WYVILNGTVEIIH  
---PDGK-----V-E---N-LFMG-NSFGITPTLDKQYMHGVVVRTKVD--  
-----D-CQFVCIAQQDYWRI-LNHVEKNTHKVEE-EGEIV-----  
>Rapgef6\_[Esox\_lucius]\_884954379  
AFANMTMSV---RRDLCTVMVFEVVEQAGTI---ILQDQQLDL---WYVILNGAVEIGH  
---PDSR-----M-E---T-LCMG-NSFGISPSLDKQYMSGVVVRTKGD--  
-----D-CQFVCIAQEDYWRI-LNHVEKNTHKVEE-EGEIVMV--  
>Rapgef6\_[Falco\_peregrinus]\_909808308  
AFANMTMSV---RRELCSVMIFEVVEQAGAI---ILEDGQELDS---WYVILNGTVEISY  
---PDGK-----S-E---S-LCMG-NSFGITPSLDKQYMNGVVVRTKVD--  
-----D-CQFVCIAQQDYWRI-LNHVEKNTHKVEE-EGEIV-----  
>Rapgef6\_[Felis\_catus]\_755689979  
AFANMTMSV---RRELCSVMIFEVVEQAGAV---ILEDGQELDS---WYVILNGTVEITH  
---PDGK-----V-E---N-LFMG-NSFGITPTLDKQYMHGVVVRTKVD--  
-----D-CQFVCIAQQDYWRI-LNHVEKNTHKVEE-EGEIV-----  
>Rapgef6\_[Ficedula\_albicollis]\_102095556  
AFANMTMSV---RRELCSVMIFEVVEQAGAI---ILEDGQELDS---WYVILNGTVEISY  
---PDGK-----S-E---S-LCMG-NSFGITPSLDKQYMNGVVVRTKVD--  
-----D-CQFVCIAQQDYWRI-LNHVEKNTHKVEE-EGEIV-----  
>Rapgef6\_[Fulmarus\_glacialis]\_697019310  
AFANMTMSV---RRELCSVMIFEVVEQAGAI---ILEDGQELDS---WYVILNGTVEISY  
---PDGK-----S-E---S-LCMG-NSFGITPSLDKQYMNGVVVRTKVD--  
-----D-CQFVCIAQQDYWRI-LNHVEKNTHKVEE-EGEIV-----  
>Rapgef6\_[Fundulus\_heteroclitus]\_831570944  
AFANMTMSV---RRDLCSVMVFEVVEQSGTV---ILHNKQELDH---WYVILNGAVEISH  
---PESR-----S-E---T-LCMG-NSFGISPSLDKQYMNGEVRTKGD--  
-----D-CQFVCIAQEDYWRI-LNHVEKNTHKVEE-EGEIVMV--  
>Rapgef6\_[Galeopterus\_variegatus]\_667332237  
AFANMTMSV---RRELCSVMIFEVVEQAGAI---ILEDGQELDS---WYVILNGTVEISH  
---PDGK-----V-E---N-LFMG-NSFGITPTLDKQHMHGVRRTKVD--  
-----D-CQFVCIAQQDYWRI-LNHVEKNTHKVEE-EGEIV-----

>Rapgef6\_[Gallus\_gallus]\_971418561  
 AFANMTMSV---RRELCSVMIFEVVEQAGAI---ILEDGQELDS---WYVILNGTVEISY  
 ---PDGK-----S-E---S-LCMG-NSFGITPSLDKQYMNGVVRTKVD--  
 -----D-CQFVCIAQQDYWRI-LNHVEKNTHKVEE-EGEIV----  
 >Rapgef6\_[Gavia\_stellata]\_678177468  
 AFANMTMSV---RRELCSVMIFEVVEQAGAI---ILEDGQELDS---WYVILNGTVEISY  
 ---PDGK-----S-E---S-LCMG-NSFGITPSLDKQYMNGVVRTKVD--  
 -----D-CQFVCIAQQDYWRI-LNHVEKNTHKVEE-EGEIV----  
 >Rapgef6\_[Gekko\_japonicus]\_975091751  
 AFANMTMSV---RRELCSVMIFEVVEQAGTI---ILEDGQELDS---WYVILNGTVEISH  
 ---PDGK-----T-E---S-LCMG-NSFGITPSLEKQYMNGVVRTKVD--  
 -----D-CQFVCIAQQDYWRI-LNHVEKNTHKVEE-EGEIV----  
 >Rapgef6\_[Haliaeetus\_albicilla]\_700361031  
 AFANMTMSV---RRELCSVMIFEVVEQAGAI---ILEDGQELDS---WYVILNGTVEISY  
 ---PDGK-----S-E---S-LCMG-NSFGITPSLDKQYMNGVVRTKVD--  
 -----D-CQFVCIAQQDYWRI-LNHVEKNTHKVEE-EGEIV----  
 >Rapgef6\_[Haliaeetus\_leucocephalus]\_729760461  
 AFANMTMSV---RRELCSVMIFEVVEQAGAI---ILEDGQELDS---WYVILNGTVEISY  
 ---PDGK-----S-E---S-LCMG-NSFGITPSLDKQYMNGVVRTKVD--  
 -----D-CQFVCIAQQDYWRI-LNHVEKNTHKVEE-EGEIV----  
 >Rapgef6\_[Harpegnathos\_saltator]\_749732965  
 AFTNMTLAV---RRALCAVMVFAVVERAGMV---VLNDGEELDS---WSVLINGAVEVEQ  
 ---SNGE-----I-Q---Q-LCLG-DCFGILPTMDRLLHCGVMRTKCD--  
 -----D-CQFVCVTQADYFRI-QHQGEENTRRHE-ENGRVI----  
 >Rapgef6\_[Heterocephalus\_glaber]\_512948458  
 AFANMTMSV---RRELCSVMIFEVVEQAGAV---ILEDGQELDS---WYVILNGTVEISH  
 ---PDGK-----V-E---N-LFMG-NSFGITPTLDKQYMHGIVRTKVD--  
 -----D-CQFVCIAQRDYWRI-LNHVEKNTHKVEE-EGEIV----  
 >Rapgef6\_[Ictalurus\_punctatus]\_1042302955  
 AFANMTMSV---RRELCTVMVFEVVEHAGTI---ILHDKQELNL---WYVILNGAVEISY  
 ---GDGR-----T-E---I-LCMG-NSFGISASLVKQCMNGEVRTKGD--  
 -----D-CQLVCIAQEDYWRI-LNHVEKNMHKVEE-EGEIVMV--  
 >Rapgef6\_[Ictidomys\_tridecemlineatus]\_532100447  
 AFANMTMSV---RRELCSVMIFEVVDQAGAI---ILEDGQELDS---WYVILNGTVEINH  
 ---PDGK-----V-E---N-LFMG-NSFGITPTLDKQYMRGIVRTKVD--  
 -----D-CQFVCIAQQDYWRI-LNHVEKNTHKVEE-EGEIV----  
 >Rapgef6\_[Larimichthys\_crocea]\_808885705  
 AFANMTMSV---RRDLCSVMVFEVVEQAGTV---ILHNKQELDL---WYVILNGAVEISH  
 ---PEGR-----V-E---T-LCMG-NSFGISPSPSLDKQYMNGEVRTKGD--  
 -----D-CQFVCIAQEDYWRI-LNHVEKNTHKVEE-EGEIVMV--  
 >Rapgef6\_[Lepisosteus\_oculatus]\_972976862  
 AFANMTMSV---RRELCSVMKFEVIEHAGKV---ILQDGQELDM---WYVILNGSVEVFH  
 ---PDGR-----L-E---I-LCMG-NSFGISPSPSLDKQFMSGVLVRTKVE--  
 -----D-CQFVCIAQEDYWRI-LNHVEKNTHKVEE-EGEIVMV--  
 >Rapgef6\_[Leptosomus\_discolor]\_700411390  
 AFANMTMSV---RRELCSVMIFEVVEQAGAI---ILEDGQELDS---WYVILNGTVEISY  
 ---PDGK-----S-E---S-LCMG-NSFGITPSLDKQYMNGVVRTKVD--  
 -----D-CQFVCIAQQDYWRI-LNHVEKNTHKVEE-EGEIV----  
 >Rapgef6\_[Limulus\_polyphemus]\_926627213  
 AFANMTLAV---RRALCAVMVFAVVEKAGTV---VMNDGEELDS---WSVIVNGQVEVEL  
 ---PDGN-----I-Q---E-LHFG-DSFGITATTEKMYHQGTMRTKVD--  
 -----D-CQFVCIAQSDYHKE-LHQGEENTKKHEE-DGQVI----  
 >Rapgef6\_[Lipotes\_vexillifer]\_602699629  
 AFANMTMSV---RRELCSVMIFEVVEQAGAI---ILEDGQELDS---WYVILNGTVEISH

```

---PDGK-----V-E---N-LFMG-NSFGITPTLDKQYTHGVVRTKVD--
-----D-CQFVCIAQQDYWRI-LNHVEKNTHKVEE-EGEIV-----
>Rapgef6_[Macaca_nemestrina]_795530958
AFANMTMSV---RRELCSVMIFEVVEQAGAI---ILEDGQELDS---WYVILNGTVEISH
---PDGK-----V-E---N-LFMG-NSFGITPTLDKQYMHGIVRTKVD--
-----D-CQFVCIAQQDYWRI-LNHVEKNTHKVEE-EGEIV-----
>Rapgef6_[Mandrillus_leucophaeus]_795275466
AFANMTMSV---RRELCSVMIFEVVEQAGAI---ILEDGQELDS---WYVILNGTVEISH
---PDGK-----V-E---N-LFMG-NSFGITPTLDKQYMHGIVRTKVD--
-----D-CQFVCIAQQDYWRI-LNHVEKNTHKVEE-EGEIV-----
>Rapgef6_[Marmota_marmota_marmota]_984113345
AFANMTMSV---RRELCSVMIFEVVDQAGAI---ILEDGQELDS---WYVILNGTVEINH
---PDGK-----V-E---N-LFMG-NSFGITPTLDKQYMRGIVRTKVD--
-----D-CQFVCIAQQDYWRI-LNHVEKNTHKVEE-EGEIV-----
>Rapgef6_[Maylandia_zebra]_499022069
AFANMTMSV---RRDLCSVMMFEVVEQAGTV---ILHDKQELDH---WYVILNGAVEISH
---HDGR-----T-E---T-LCMG-NSFGISPDLKQYMNGEVRTKGD--
-----D-CQFVCIAQEDYWRI-LNHVERNTHKVEE-EGEIV-----
>Rapgef6_[Melopsittacus_undulatus]_527258131
AFANMTMSV---RRELCSVMIFEVVEQAGAI---ILEDGQELDS---WYVILNGTVEISY
---PDGK-----S-E---S-LCMG-NSFGITPSLDKQYMNGVVRTKVD--
-----D-CQFVCIAQQDYWRI-LNHVEKNTHKVEE-EGEIV-----
>Rapgef6_[Microcebus_murinus]_829753475
AFANMTMSV---RRELCSVMIFEVVEQAGAI---ILEDGQELDS---WYVILNGTVEISH
---PDGR-----V-E---N-LFMG-NSFGITPTLDKQYMHGVVRTKVD--
-----D-CQFVCIAQQDYWRI-LNHVEKNTHKVEE-EGEIV-----
>Rapgef6_[Microtus_ochrogaster]_532012666
AFANMTMSV---RRELCSVMIFEVVEQAGAV---ILEDGQELDS---WYVILNGTVEISH
---PDGR-----I-E---N-LFMG-NSFGIVPTLDKQHMHGIVRTKVD--
-----D-CQFVCIAQQDYWRI-LNHVEKNTHKVEE-EGEIV-----
>Rapgef6_[Mus_musculus]_357394799
AFANMTMSV---RRELCSVMIFEVVEQAGAV---ILEDGQELDS---WYVILNGTVEISH
---PDGK-----I-E---N-LFMG-NSFGIVPTLDKQHMHGAVRTKVD--
-----D-CQFVCIAQQDYWRI-LNHVEKNTHKVEE-EGEIV-----
>Rapgef6_[Mustela_putorius_furo]_511825338
AFANMTMSV---RRELCTVMIFEVVEQAGAI---ILEDGQELDS---WYVILNGTVEITH
---PDGK-----V-E---N-LFMG-NSFGITPTLDKQYMHGVVRTKVD--
-----D-CQFVCIAQQDYWRI-LNHVEKNTHKVEE-EGEIV-----
>Rapgef6_[Myotis_brandtii]_554541927
AFANMTMSV---RRELCSVMIFEVVEQAGAI---ILEDGQELDS---WYVILNGTVEISH
---SEGK-----V-E---N-LFMG-NSFGITPTLDKQYMHGVVRTKVD--
-----D-CQFVCIAQQDYWRI-LNHVEKNTHKVEE-EGEIV-----
>Rapgef6_[Myotis_lucifugus]_558176189
AFANMTMSV---RRELCSVMIFEVVEQAGAI---ILEDGQELDS---WYVILNGTVEISH
---SDGK-----V-E---N-LFMG-NSFGITPTLDKQYMHGVVRTKVD--
-----D-CQFVCIAQQDYWRI-LNHVEKNTHKVEE-EGEIV-----
>Rapgef6_[Neolamprologus_brichardi]_583979497
AFANMTMSV---RRDLCSVMMFEVVEQAGTV---ILHDKQELDH---WYVILNGAVEISY
---HDGR-----T-E---T-LCMG-NSFGISPDLKQYMNGEVRTKGD--
-----D-CQFVCIAQEDYWRI-LNHVERNTHKVEE-EGEIVMV--
>Rapgef6_[Nestor_notabilis]_701323631
AFANMTMSV---RRELCSVMIFEVVEQAGAI---ILEDGQELDS---WYVILNGTVEISY
---PDGK-----S-E---S-LCMG-NSFGITPSLDKQYMNGVVRTKVD--
-----D-CQFVCIAQQDYWRI-LNHVEKNTHKVEE-EGEIV-----

```



>Rapgef6\_[*Nomascus leucogenys*]<sub>332221644</sub>  
AFANMTMSV---RRELCSVMIFEVVEQAGAI---ILEDGQELDS---WYVILNGTVEISH  
---PDGK-----V-E---N-LFMG-NSFGITPTLDKQYMHGIVRTKVD--  
-----D-CQFVCIAQQDYWRI-LNHVEKNTHKVEE-EGEIV-----  
>Rapgef6\_[*Odobenus rosmarus divergens*]<sub>472377734</sub>  
AFANMTMSV---RRELCSVMIFEVVEQAGAI---ILEDGQELDS---WYVILNGTVEITH  
---PDGK-----V-E---N-LFMG-NSFGITPTLDKQYMHGVVRTKVD--  
-----D-CQFVCIAQQDYWRI-LNHVEKNTHKVEE-EGEIV-----  
>Rapgef6\_[*Orcinus orca*]<sub>466058779</sub>  
AFANMTMSV---RRELCSVMIFEVVEQAGAI---ILEDGQELDS---WYVILNGTVEISH  
---PDGK-----V-E---N-LFMG-NSFGITPTLDKQYTHGVVRTKVD--  
-----D-CQFVCIAQQDYWRI-LNHVEKNTHKVEE-EGEIV-----  
>Rapgef6\_[*Oreochromis niloticus*]<sub>542236526</sub>  
AFANMTMSV---RRDLCSVMMFEVVEQAGTV---ILHDKQELDH---WYVILNGAVEISH  
---HDGR-----M-E---T-LCMG-NSFGISPTLDKQYMNGEVRTKGD--  
-----D-CQFVCIAQEDYWRI-LNHVERNTHKVEE-EGEIV-----  
>Rapgef6\_[*Ornithorhynchus anatinus*]<sub>1019073942</sub>  
AFANMTMSV---RRELCSVMIFEVVEQAGAT---ILEHGQELDS---WYVILNGTVEISH  
---PDGK-----S-E---S-LCMG-NSFGIIPSLDKQYMNGVVRTKVD--  
-----D-CQFVCIAQQDYWRI-LNHVEKNTHKVEE-EGEIV-----  
>Rapgef6\_[*Orycteropus afer afer*]<sub>634856153</sub>  
AFANMTMSV---RRELCSVMIFEVVEQAGAI---ILEDGQELDS---WYVILNGTVEISH  
---PDGK-----I-E---N-LFMG-NSFGITPTLDKQYMHGVVRTKVD--  
-----D-CQFVCIAQQDYWRI-LNHVEKNTHKVEE-EGEIV-----  
>Rapgef6\_[*Otolemur garnettii*]<sub>831213177</sub>  
AFANMTMSV---RRELCSVMIFEVVEQAGAI---ILEDGQELDS---WYVILNGTVEISH  
---PDGK-----V-E---N-LFMG-NSFGITPTLDKQYMHGIVRTKVD--  
-----D-CQFVCIAQQDYWRI-LNHVEKNTHKVEE-EGEIV-----  
>Rapgef6\_[*Ovis aries musimon*]<sub>803320911</sub>  
AFANMTMSV---RRELCSVMIFEVVEQAGAV---ILEDGQELDS---WYVILNGTVEISY  
---PDGK-----V-D---N-LFMG-NSFGITPTLDKQYMHGVVRTKVD--  
-----D-CQFVCIAQQDYWRI-LNHVEKNTHKVEE-KGEIV-----  
>Rapgef6\_[*Ovis aries*]<sub>803073498</sub>  
AFANMTMSV---RRELCSVMIFEVVEQAGAV---ILEDGQELDS---WYVILNGTVEISY  
---PDGK-----V-D---N-LFMG-NSFGITPTLDKQYMHGVVRTKVD--  
-----D-CQFVCIAQQDYWRI-LNHVEKNTHKVEE-KGEIV-----  
>Rapgef6\_[*Pan troglodytes*]<sub>694912260</sub>  
AFANMTMSV---RRELCSVMIFEVVEQAGAI---ILEDGQELDS---WYVILNGTVEISH  
---PDGK-----V-E---N-LFMG-NSFGITPTLDKQYMHGIVRTKVD--  
-----D-CQFVCIAQQDYWRI-LNHVEKNTHKVEE-EGEIV-----  
>Rapgef6\_[*Panthera tigris altaica*]<sub>591323548</sub>  
AFANMTMSV---RRELCSVMIFEVVEQAGAV---ILEDGQELDS---WYVILNGTVEITH  
---PDGK-----V-E---N-LFMG-NSFGITPTLDKQYMHGVVRTKVD--  
-----D-CQFVCIAQQDYWRI-LNHVEKNTHKVEE-EGEIV-----  
>Rapgef6\_[*Pantholops hodgsonii*]<sub>556768279</sub>  
AFANMTMSV---RRELCSVMIFEVVEQAGAV---ILEDGQELDS---WYVILNGTVEISY  
---PDGK-----V-D---N-LFMG-NSFGITPTLDKQYMHGVVRTKVD--  
-----D-CQFVCIAQQDYWRI-LNHVEKNTHKVEE-KGEIV-----  
>Rapgef6\_[*Papio anubis*]<sub>685547351</sub>  
AFANMTMSV---RRELCSVMIFEVVEQAGAI---ILEDGQELDS---WYVILNGTVEISH  
---PDGK-----V-E---N-LFMG-NSFGITPTLDKQYMHGIVRTKVD--  
-----D-CQFVCIAQQDYWRI-LNHVEKNTHKVEE-EGEIV-----  
>Rapgef6\_[*Parasteatoda tepidariorum*]<sub>1009601738</sub>  
AFANMTLTII---RRALCAVMVFÄVVEKAGTI---VMNDGEELDS---WSVIVNGHVEVEQ

```

---ADGR-----I-E---E-LHLG-DSFGITPTTEKMYHQGVMR TKVD--
-----D-CQFVCIAQNDYYRI-LHQGEENTRKHEE-DGEVV-----
>Rapgef6_[Parus_major]_998718768
AFANMTMSV---RRELCSVMIFEVVEQAGAI---ILEDGQELDS---WYVILNGTVEISY
---PDGK-----S-E---S-LCMG-NSFGITPSLEKQYMNGVVRTKVD--
-----D-CQFVCIAQQDYWRI-LNHVEKNTHKVEE-EGEIV-----
>Rapgef6_[Peromyscus_maniculatus_bairdii]_1008772020
AFANMTMSV---RRELCSVMIFEVVEQAGAV---ILEDGQELDS---WYVILNGTVEISH
---PDGK-----S-E---N-LFMG-NSFGIVPTLDKQYMHGVVRTKVD--
-----D-CQFVCIAQQDYWRI-LNHVEKNTHKVEE-EGEIV-----
>Rapgef6_[Phaethon_lepturus]_723128522
AFANMTMSV---RRELCSVMIFEVVEQAGAI---ILEDGQELDS---WYVILNGTVEISY
---PDGK-----S-E---S-LCMG-NSFGITPSLDKQYMTGVVRTKVD--
-----D-CQFVCIAQQDYWRI-LNHVEKNTHKVEE-EGEIV-----
>Rapgef6_[Phalacrocorax_carbo]_695144964
AFANMTMSV---RRELCSVMIFEVVEQAGAI---ILEDGQELDS---WYVILNGTVEISY
---PDGK-----S-E---S-LCMG-NSFGITPSLDKQYMHGVVRTKVD--
-----D-CQFVCIAQQDYWRI-LNHVEKNTHKVEE-EGEIV-----
>Rapgef6_[Physeter_catodon]_593723309
AFANMTMSV---RRELCSVMIFEVVEQAGAI---ILEDGQELDS---WYVILNGTVEISH
---PDGK-----V-E---N-LFMG-NSFGITPTLDKQYMHGVVRTKVD--
-----D-CQFVCIAQQDYWRI-LNHVEKNTHKVEE-EGEIV-----
>Rapgef6_[Poecilia_formosa]_617462884
AFANMTMSV---RRDLCSVMVFEVVEQSGTV---ILHNKQELDH---WYVILNGAVEISH
---AESR-----T-E---T-LCMG-NSFGISPDLKQYMNGEVRTKGD--
-----D-CQFVCIAQEDYWRI-LNHVEKNTHKVEE-EGEIVMV--
>Rapgef6_[Poecilia_reticulata]_658884514
AFANMTMSV---RRELCSVMVFEVVEQSGTV---ILHNKQELDH---WYVILNGAVEISR
---AESR-----T-E---T-LCMG-NSFGISPDLKQYMNGEVRTKGD--
-----D-CQFVCIAQEDYWRI-LNHVEKNTHKVEE-EGEIV-----
>Rapgef6_[Pongo_abelii]_686719316
AFANMTMSV---RRELCSVMIFEVVEQAGAI---ILEDGQELDS---WYVILNGTVEISH
---PDGK-----V-E---N-LFMG-NSFGITPTLDKQYMRGIVRTKVD--
-----D-CQFVCIAQQDYWRI-LNHVEKNTHKVEE-EGEIV-----
>Rapgef6_[Protobothrops_mucrosquamatus]_1002581315
AFANMTMSV---RRELCSVMIFEVVEQAGAI---ILEDGQELDS---WYVILNGTVEISY
---PDGK-----T-E---S-LCMG-NSFGITPSLEKQHMNGVVRTKVD--
-----D-CQFVCIAQQDYWRI-LNHVEKNTHKVEE-EGEIV-----
>Rapgef6_[Pseudopodoces_humilis]_929446440
AFANMTMSV---RRELCSVMIFEVVEQAGAI---ILEDGQELDS---WYVILNGTVEISY
---PDGK-----S-E---S-LCMG-NSFGITPSLEKQYMNGVVRTKVD--
-----D-CQFVCIAQQDYWRI-LNHVEKNTHKVEE-EGEIV-----
>Rapgef6_[Pteropus_alecto]_431892688
AFANMTMSV---RRELCSVMIFEVVEQAGAI---ILEDGQELDS---WYVILNGTVEISH
---SDGK-----V-E---N-LFMG-NSFGITPTLDKQYMRGVVRTKVD--
-----D-CQFVCIAQQDYWRI-LNHVEKNTHKVEE-EGEIV-----
>Rapgef6_[Pygoscelis_adeliae]_690439934
AFANMTMSV---RRELCSVMIFEVVEQAGAI---ILEDGQELDS---WYVILNGTVEISY
---PDGK-----S-E---S-LCMG-NSFGITPSLDKQYMNGVVRTKVD--
-----D-CQFVCIAQQDYWRI-LNHVEKNTHKVEE-EGEIV-----
>Rapgef6_[Python_bivittatus]_602628151
AFANMTMSV---RRELCSVMIFEVVEQAGAI---ILEDGQELDS---WYVILNGTVEISH
---PDGK-----T-E---S-LCMG-NSFGITPSLEKQHMNGVVRTKVD--
-----D-CQFVCIAQQDYWRI-LNHVEKNTHKVEE-EGEIV-----

```

>Rapgef6\_[Rhinopithecus\_roxellana]\_724913891  
AFANMTMSV---RRELCSVMIFEVVEQAGAI---ILEDGQELDS---WYVILNGTVEISH  
---PDGK-----V-E---N-LFMG-NSFGITPTLDKQYMHGIVRTKVD--  
-----D-CQFVCIAQQDYWRI-LNHVEKNTHKVEE-EGEIV----  
>Rapgef6\_[Rousettus\_aegyptiacus]\_1012239480  
AFANMTMSV---RRELCSVMIFEVVEQAGAI---ILEDGQELDS---WYVILNGTVEISH  
---SDGK-----V-E---N-LFMG-NSFGIIPPTLDKQYMRGVVVRTKVD--  
-----D-CQFVCIAQQDYWRI-LNHVEKNTHKVEE-EGEIV----  
>Rapgef6\_[Saccoglossus\_kowalevskii]\_585647408  
AFSNMTLAV---RRALCAVMVFÄVVEKAATV---VMKDGEELDS---WSVILNGHVEISR  
---PDGT-----L-E---H-LHLG-DSFGCVPSLTRQTHRGLMKTKVD--  
-----D-CQFVCIAQTDYRI-LHQGEENTRKVEE-----  
>Rapgef6\_[Saimiri\_boliviensis\_boliviensis]\_725550658  
AFANMTMSV---RRELCSVMIFEVVEQAGAV---ILEDGQELDS---WYVILNGTVEISH  
---PDGK-----V-E---N-LFMG-NSFGITPTLDKQYMHGIVRTKVD--  
-----D-CQFVCIAQQDYWRI-LNHVEKNTHKVEE-EGEIV----  
>Rapgef6\_[Sarcophilus\_harrisii]\_821455239  
AFANMTMSV---RRELCSVMIFEVVDQAGAV---ILADGQELDS---WYVILNGTVEISY  
---PDGK-----S-E---S-LCMG-NSFGIIPPTLDKQYMNGVVVRTKVD--  
-----D-CQFVCIAQEDYRI-LNHVEKNTHKVEE-EGEIV----  
>Rapgef6\_[Scleropages\_formosus]\_938080831  
AFANMTMSV---RRELCTVMVFÄVVERAGTV---ILHDRQELDL---WYVILNGSVEVIH  
---TDGR-----A-E---V-LCMG-NSFGISPPLDKQYMDGEVVRTKGD--  
-----D-CQFVCIAQEDYRI-LNHVEKNMTHKVEE-EGEIVMV--  
>Rapgef6\_[Serinus\_canaria]\_683916584  
AFANMTMSV---RRELCSVMIFEVVEQAGAI---ILEDGQELDS---WYVILNGTVEISY  
---PDGK-----S-E---S-LCMG-NSFGITPPLDKQYMNGVVVRTKVD--  
-----D-CQFVCIAQQDYWRI-LNHVEKNTHKVEE-EGEIV----  
>Rapgef6\_[Sinocyclocheilus\_anshuiensis]\_1024970981  
AFANMTMSV---RRELRCVMMFEVVEQEGTI---ILQDKQELDL---WYVILNGAVEISY  
---GDGR-----T-E---I-LCMG-NSFGISPPLDRQFMNGVVCTKGD--  
-----D-CQFVCIAQEDYRI-LNHVEKNTHKVEE-EGEIVMV--  
>Rapgef6\_[Sinocyclocheilus\_grahami]\_1020491327  
AFANMTMSV---RRELRCVMMFEVVEQEGTI---ILQDKQELDL---WYVILNGSVEISY  
---GDGR-----T-E---I-LCMG-NSFGISPPLDRQFMNGVVCTKGD--  
-----D-CQFVCIAQEDYRI-LNHVEKNTHKVEE-EGEIVMV--  
>Rapgef6\_[Sinocyclocheilus\_rhinocerosus]\_1025412073  
AFANMTMSV---RRELRCVMMFEVVEQEGTI---ILQDKQELDL---WYVILNGAVEISY  
---GDGR-----T-E---I-LCMG-NSFGISPPLDRQFMNGVVCTKGD--  
-----D-CQFVCIAQEDYRI-LNHVEKNTHKVEE-EGEIVMV--  
>Rapgef6\_[Sorex\_araneus]\_505829179  
AFANMTMSV---RRELCSVMIFEVVEQAGAI---ILEDGQELDS---WYVILNGTVEISH  
---PDGR-----V-E---N-LFMG-NSFGITPTLDKQYMHGVVVRTKVD--  
-----D-CQFVCIAQQDYRI-LNHVEKNTHKVEE-EGEIV----  
>Rapgef6\_[Struthio\_camelus\_australis]\_697433805  
AFANMTMSV---RRELCSVMIFEVVEQAGAI---ILEDGQELDS---WYVILNGTVEISY  
---PDGK-----S-E---S-LCMG-NSFGITPPLDKQYMNGVVVRTKVD--  
-----D-CQFVCIAQQDYWRI-LNHVEKNTHKVEE-EGEIV----  
>Rapgef6\_[Sturnus\_vulgaris]\_959086177  
AFANMTMSV---RRELCSVMIFEVVEQAGAI---ILEDGQELDS---WYVILNGTVEISY  
---PDGK-----S-E---S-LCMG-NSFGITPPLDKQYMNGVVVRTKVD--  
-----D-CQFVCIAQQDYWRI-LNHVEKNTHKVEE-EGEIV----  
>Rapgef6\_[Sus\_scrofa]\_927105974  
AFANMTMSV---RRELCSVMIFEVVEQAGAI---ILEDGQELDS---WYVILNGTVEISH

---PDGK-----V-E---N-LFMG-NSFGVTPTLDKQYMHGVVRTKVD--  
-----D-CQFVCIAQQDYWRI-LNHVEKNTHKVEE-EGEIV-----  
>Rapgef6\_[Taeniopygia\_guttata]\_823480934  
AFANMTMSV---RRELCSVMIFEVVEQAGAI---ILEDGQELDS---WYVILNGTVEISY  
---PDGK-----S-E---S-LCMG-NSFGITPSLDKQYMNGVVRTKVD--  
-----D-CQFVCIAQQDYWRI-LNHVEKNTHKVEE-EGEIV-----  
>Rapgef6\_[Takifugu\_rubripes]\_768939119  
AFANMTMSV---RRELCSVMIFEVVEQAGTV---ILHNKQELDL---WYVILNGAVEFSY  
---PDGR-----M-E---T-LCMG-NSFGISPSLDKQYMNGEVRTKGD--  
-----D-CQFVCIAQEDYWRI-LNHVEKNTHKVEE-EGEIV-----  
>Rapgef6\_[Thamnophis\_sirtalis]\_927123537  
AFANMTMSV---RRELCSVMIFEVVEQAGAI---ILEDGQELDS---WYVILNGTVEISY  
---PDGK-----T-E---S-LCMG-NSFGITPSLEKQHMNGVVRTKVD--  
-----D-CQFVCIAQQDYWRI-LNHVEKNTHKVEE-EGEIV-----  
>Rapgef6\_[Tinamus\_guttatus]\_697413352  
AFANMTMSV---RRELCSVMIFEVVEQAGAI---ILEDGQELDS---WYVILNGTVEISY  
---PDGK-----S-E---S-LCMG-NSFGITPSLDKQYMNGMVVRTKVD--  
-----D-CQFVCIAQQDYWRI-LNHVEKNTHKVEE-EGEIV-----  
>Rapgef6\_[Trichechus\_manatus\_latirostris]\_471406079  
AFANMTMSV---RRELCSVMIFEVVEQAGAI---ILEDGEELDS---WYVILNGTVEISH  
---PDGK-----I-E---N-LFMG-NSFGITPSLDKQYMHGVVRTKVD--  
-----D-CQFVCIAQQDYWRI-LNHVEKNTHKVEE-EGEIV-----  
>Rapgef6\_[Tyto\_alba]\_678189604  
AFANMTMSV---RRELCSVMIFEVVEQAGAI---ILEDGQELDS---WYVILNGTVEISY  
---PDGK-----S-E---S-LCMG-NSFGITPSLDKQYMNGVVRTKVD--  
-----D-CQFVCIAQQDYWRI-LNHVEKNTHKVEE-EGEIV-----  
>Rapgef6\_[Vicugna\_pacos]\_560981325  
AFANMTMSV---RRELCSVMIFEVVEQAGAV---ILEDGQELDS---WYVILNGTVEISH  
---PDGK-----V-E---N-LFMG-NSFGITPTLDKQYMRGVVRTKVD--  
-----D-CQFVCIAQQDYWRI-LNHVEKNTHKVEE-EGEIV-----  
>Rapgef6\_[Xiphophorus\_maculatus]\_941798194  
AFANMTMSV---RRDLCSVMIFEVVEQSGTV---ILHNKQELDH---WYVILNGAVEISH  
---AESR-----T-E---T-LCMG-NSFGISPSLNKQYMNGEVRTKGD--  
-----D-CQFVCIAQEDYWRI-LNHVEKNTHKVEE-EGEIVMV--

**>Supplementary data 3: Sequence alignment of GEF of RAPGEF1-6.**

```
>Rapgef0_[Absidia_glauca]_1021066824
---ELARQLTVMSDKLYSRIKPV---ECL-----DKNWG-RADS--Q-H-----TAA--
-----NVKASIEYSNQVTAWVTDSILSKEELKKRSASVVKHWIYVA-
EKCRLLHNYNTCMAILSAFDNSSVGRKRTWETMSARTTAILTGIRRLMGANRNFTEYR
DIIHK--VNP-----PCIPF-LGIYLQDLTFI-----
-----EDGNS--NFLKKT---N---NLINFA-KRMKTGEVI---RELQQYQSTPYIL--
-----QM-----VPDIQEFIKTHLQSSRDEETLYNLSLA---VEPR
>Rapgef0_[Acanthamoeba_castellanii_str._Neff]_470420624
--EELARQLTLMEFETFRAIR---PSELL-----NQVWN-KPK-----Q--RH-RAP--
-----NVVKMIRRFNEISNWWATSIVGSEKIRQRVKVMTKFLRLA-
DILRK-MNNFNTMVAVVAGINASAVHRLKWTKEEVMKGIWPQFAECERLMSNEGSYKTYR
GALFQ--ARP-----PCLPY-LGVYLTDLTFI-----
-----EDGNP--DYV-----N---ELINFS-KRSLI-----
-----
>Rapgef0_[Acytostelium_subglobosum_LB1]_831776467
--EEVARQLTLIDFEIFSSIK---PSELL-----NQSWN-KPK-----L--RH-RSP--
-----NVMLIINRFNEISQWVASIILSFDKVKDRARVMSKIVKIA-
EYLMKPLNNFNTSMAILSGLNAASVHRLKFTKEEMPKHIQVTLADLQGQLSSAQAYKTYR
DILAK--SNP-----PCLPY-LGVCLTDLTFI-----
-----EEGNP--DLI-----K---GFINFS-KRKLIYNAI---FTVQSFQNTNTR-----
-----YN-----
>Rapgef0_[Aedes_aegypti]_157125916
-TKDVAYHMTLFDWDLFWAVHEY---ELL-----YHTFG-RHHF--N-K-----ITS--
-----NLDVFIRRFNEIQYWVVTEIVSTSNLTKRMSLVKKFIKLA-
AFCKE-YQNLNAFFAIVMGLSNMAVSRLSQTWDKLPKFRKLFTEYEALIDPSRNHRAYR
MSVGK--LQP-----PVIPIF-MPLLLKDMTFA-----
-----HEGNK--TSL-----D---GLVNFE-KMHMAQTM---RTVRYCRSRHLVL-D
PPSP-KN-----ENEIRQYISC-FRTIDNQRVLTAMSQK---VEPR
>Rapgef0_[Aedes_albopictus]_1000202901
-----
-----
-----
MSVGK--LQP-----PVIPIF-MPLLLKDMTFA-----
-----HEGNK--TSL-----D---GLVNFE-KMHMAQTM---RTVRYCRSRHLVLDP
-PSP-KN-----ENEIRQYISC-FRTIDNQRVLTAMSQK---VEPR
>Rapgef0_[Ancylostoma_ceylanicum]_597883026
GSHELAQQLLVLTQLFEATDEI---ELV-----TQVIG-RDQF--PGR-----VPS--
-----NLDLLMRRFNEVQYWATTEVLLA-LPQKRVTNLRKFIKIA-
MYAKE-NRDLMTLFAITLGLSNIASVRLTHLWERLPAKLRRQFAEFESLLDPSRNHRPYR
ALVAK--MSP-----PLIPF-VPLLLKDLTFI-----
-----HEGNK--TYT-----N---GLVNFE-KM-----
-----
>Rapgef0_[Ancylostoma_duodenale]_748380306
NAQVVAAQLTLQDFAVFASIEPT---EYI-----DNLFQ-L-ES----R-YGS-P----
-----RLEEFERIFNREMWVATEVCSENVQKRAKLIKFKFIKVA-
RHCRE-LRNFNMSFAIMSGLDKPAVRRHLSTWERISGKYIRMLEDVQQLVDPSRNMSKYR
QHAEVSQEP-----PVVPI-YPVIKKDLTFS-----
-----HEGNP--TYC-----D---KLVNFE-KLRLIAKSV---RAVSKLSSAPYEISS
MAER-----
>Rapgef0_[Anopheles_darlingi]_568252345
-----TS--
-----NLDVFIRRFNEIQYWVVTEIVSTTNLTKRMSLVKKFIKLA-
AFCKE-YQNLNAFFAIVMGLSNTAVSRLSLTWDKLPKFRKLFTEYEALIDPSRNHRAYR
```

MSVGK--LQP-----PVIPF-MPLLLKDMTFA-----  
 -----HEGNK--TSL-----D---GLVNFE-KMHMQM---RTVRFCSRHLVL-D  
 PPSP-KN-----ENEIRNYIRC-FRTIDNQRVLNSMSQK--VEPR  
 >Rapgef0\_[Anopheles\_sinensis]\_668451108  
 STKDVAYHMTLFDWDLFWAVHEY----ELL-----YHTFG-RHHF--N-K-----ITS--  
 -----NLDVFIRRFNEIQYWVTEIVSTTNMTKRMSLVKKFIKLA-  
 AFCKE-YQNLNAFFAIVMGLSNTAVSRLSGTWDLPSKFRKLFTEYEALIDPSRNHRAYR  
 MSVGK--LQP-----PVIPF-MPLLLKDMTFA-----  
 -----HEGNK--TSL-----D---GLVNFE-KMHMQM---RAVRFCSRHLVL-D  
 PPSP-KN-----ENEIRNYIRC-FRTIDNQRVLNSMSQK-----  
 >Rapgef0\_[Batrachochytrium\_dendrobatidis\_JAM81]\_575477186  
 ---EVAQQLCIHNSGIFRSIQPI----EFL-----NEIWS-G-DI----D-----SSP--  
 -----SFKFFVERFDKESYWTATELVKVKDLKKRTLILKKFIQLI-  
 KESLS-LNNFFTTFSLIAGLNLTTPVQRLKKTWEALPEKSKKLWSEVEKIADPSKNMKIYR  
 DQLAA--SVP-----PMVPF-LPIYLKDLTFI-----  
 -----NDGNQ--SKA-----RGMINIE-KLRMMSS-----  
 -----  
 >Rapgef0\_[Batrachochytrium\_dendrobatidis\_JEL423]\_1028569995  
 ---EVAQQLCIHNSGIFRSIQPI----EFL-----NEIWS-G-DI----D-----SSP--  
 -----SFKFFVERFDKESYWTATELVKVKDLKKRTLILKKFIQLI-  
 KESLS-LNNFFTTFSLIAGLNLTTPVQRLKKTWEALPEKSKKLWSEVEKIADPSKNMKIYR  
 DQLAA--SVP-----PMVPF-LPIYLKDLTFI-----  
 -----NDGNQ--SKA-----RGMINIE-KLRMMSS-----  
 -----  
 >Rapgef0\_[Branchiostoma\_floridae]\_260811986  
 SSREMAQMTLYDWELFNCVHEN----ELI-----YHIFG-RHKF--G-K-----ITS--  
 -----NLDLLRRFNEVQFWVTEMLTPQVGKRVQLLRKFIKIA-  
 AYCKE-YQNLNAFFAIIMGLGNIASRLSQTWERLPNKFKRMFAEFESFMDPSRNHRVYR  
 LAMSK--LQP-----PIIPF-IPLLMKDMTFT-----  
 -----HEGNK--TYY-----D---GLVNFE-KMHMISSTI---RTIRQCGSEPFPNFD-  
 PPPVKN-----IQEVRYNRS-LNVIDNQRTLTQLSHK---LEPR  
 >Rapgef0\_[Caenorhabditis\_brenneri]\_341877847  
 -----ELL-----YQVIG-RESF--PLS-----MPF--  
 -----NLDLLVRRFNEIQHWSTTEILLA-SEENRIEILKKFITIA-  
 TIARE-YRDLLTVFAITLGLSHTSVSRLTTLTWSKLPPVTLKTFSELENLLDPTNRHMYR  
 LMVSK--MTS-----PYIPF-VPLILKDLTFI-----  
 -----HQGNK--SFY-----N---GLVNFE-KMHMFAKIF---RSFRQCKT--Q----  
 -----  
 >Rapgef0\_[Calliphora\_vicina]\_158935664  
 STKELAYYITTFDWDLFWAVHEY----ELL-----YHTFG-RHHF--G-K-----ITA--  
 -----NLDVFLRRFNEIQYWIIVTEIVSAASMSKRVGLLRKFIKLA-  
 AYCKE-YQNLNAFFAIVMGLSNMAVSRLQQTWEKIPSKFRKLYQEFALIDPSRNHRAYR  
 VFVGK--LQP-----PLIPF-MPLLLKDMTFA-----  
 -----HEGNK--TSL-----D---GLVNFE-KMHMQM---RTLRFCSRSLGL-E  
 PPSP-KS-----EGEVRSFISC-LRVI-----  
 >Rapgef0\_[Capitella\_teleata]\_443707267  
 SSREVAYQLTLYDWELFNCVHEY----ELI-----YLVFG-RQNF--G-R-----ITA--  
 -----NLDIFLRRFNEVQYVASEMCLTQPVNKRQVLLRKLKIA-  
 AYCKE-MQNLNSFFAIAMGLSNIASRLSQTWEKLPNKFKKIFADFEMSMDPSRNHRVYR  
 LSAK--MQP-----PIVPF-MPLLMKDMTFT-----  
 -----HEGNK--THF-----D---GLINFE-KMHMIAQTL---RTIRFCRSKSLDLE-  
 PPQSLKN-----SQEVKSYART-LKVIDNQRVLTQLSHK---LEPR  
 >Rapgef0\_[Cyprinus\_carpio]\_966662070  
 SSKDLAFQMTQYDWELFSCVHEY----ELV-----YHTFG-RQAY--R-R-----STA--

-----NLELFLKRFNQVQLWVVTEVCLCGTLSKRVQLLKKFIKIA-  
AHCRE-FKNLNSFFAIIMGMCNPAVSRLSQTWEKLPSKFKKFYSEFESFLDPSRNHRAYR  
LTVAK--MEP-----PIIPF-MPLLIKDMTFT-----  
-----HEGNK--TFV-----D---GLVNFE-KMRLIANTI---RAVRHCRSOLF--  
-----

>Rapgef0\_[Danaus\_plexippus]\_357608300

---EVAVQLTLQDFCIFRQIEST---EYV-----DDLFD-L-KS----R-YGT-PM---  
-----LSQFAGLVNKEMFWVVTEVVNEQNIVRRSKI IKQFIKVA-  
RHCKE-CKNFNSMFAIISGLGHGAVSRLRMTWEKLPTKYNKLFSDLQMLMDPSRNMSKYR  
QLVTIEQGRS-----PVIPF-YPVVRKDLTFI-----  
-----HLGND--TKV-----E---GMVNFE-KLRMIAKEV---RTLTMCSPPYD---  
-----

>Rapgef0\_[Daphnia\_pulex]\_321471019

STRELAYYITLIDWDLFCSVHEY----ELL-----YHVAG-AQPF--R-K-----IKS--  
-----NLDLFLRRFNEIQYWVVTEICLANTLGKRVQLLRKFIKLA-  
AYCKE-FQNLNAFFALVMGLSNVAVSRLTQTWERLPSKLRKMFTEFDGLIEPSRNHRAYR  
IAGVK--LQP-----PILPF-MPLLLKDMTFT-----  
-----HEGNR--TLL-----DS-AGLINFE-KMHMLAQT---RTLYCRSRQLLL-Q  
PPTP-RS-----EQEVRYIIRN-LRVIDNQRI LTGLSQR---LEPK

>Rapgef0\_[Dictyocaulus\_viviparus]\_768188889

GSYELAQQLYYLHTQLFEATDEI---ELV-----TQVIG-RDQF--PGR-----IPS--  
-----NLDLLMRRFNEVQYWATTEVLLA-SPQKRVHTLRKFIKIA-  
LYAKE-NRDMLTLFAITLGLSNVAVSRLTNLWDRLPNKLRRQFAEFESLLNPSRNHRPYR  
ALVSK--MSP-----PMIPF-VPLLLKDLTFI-----  
-----HEGNK--TYY-----N---GLVNFE-KMHMIANIL---RSFRQCKS-RCTGSQ  
VESK--K-----ISETQNFIRN-FCVVDNQR-----

>Rapgef0\_[Dictyostelium\_fasciculatum]\_470247515

--EEIARQLTLIDFEMFAAIK---PSELL-----NQSWN-KPK-----L--RH-RSP--  
-----NVLALISRFNEISSWTASMI LNHDKV KDRARVMAKFVKIG-  
EFLKQLNNYNTAMAILSGLNQSAIHRKFTREEMPKAVQQSYTDLQAQLSNAFSYKVYR  
ELLAK--ANP-----PLLPY-LGVCLTDLTFI-----  
-----EDGNP--DFI-----G---NLINFS-KRRLV-----  
-----

>Rapgef0\_[Dictyostelium\_purpureum]\_330795492

--EEIARQLTLMDFEIFSNIK---STELL-----NQSWN-KPK-----L--RY-RSP--  
-----NVLTLINRFNEISQWTATSILSYERVKDRARIMAKFIRIA-  
EYSMKLLNNFNNTSMAILSGLNASSVHRLKFTKEEMPKHTQQVYAE LQQQLSSSQSYKEYR  
ALLAK--ANP-----PCLPY-LGVYLTDLTFF-----  
-----EEGNP--DFI-----Q---GYINFG-KRKLIYGS I---SNVQSFQNAK-----  
-----YN-----

>Rapgef0\_[Drosophila\_busckii]\_924553109

---ELAIQLTLQDFANFRQIEST---EYI-----DELFE-L-QS----K-YGV-PM---  
-----LSKFSELVNREMFVVSEICGEHNIVRRMKIVKQFIKIA-  
RHCKE-CRNFNSMFAIISGLGHGAVSRLRLTWEKVPSKYQRLFN DLQDLMDPSRNMSKYR  
QLVSAELLAQH-----PIIPF-YPIVKKDLTFI-----  
-----HLGND--TRV-----D---GLINFE-KLRMLSKEV---RLLTHMCSSPYD---  
-----

>Rapgef0\_[Drosophila\_erecta]\_968029732

STKELAYHITLFEWDLFWAVHEY----ELL-----YHTFG-RHHF--G-K-----ITA--  
-----NLDVFLRRFNEVQYWIVTELVSTP SLSKRVGLVRKFIKLA-  
AYCKE-YQNLNAFFAVVMGLSNMAVSRLQQTWEKIPSKFRKIFQEFEALIDPSRNHRAYR  
VFVGK--LQP-----PLIPF-MPLLLKDMTFA-----  
-----HEGNK--TSL-----D---GLVNFE-KMHMAQT---RTIRFCRSRSLGL-E  
PPSP-KS-----EGEVRSYISS-FRVIDNQRVLTAMSQK---VEP-

```

>Rapgef0_[Drosophila_melanogaster]_24586077
STKELAYHITLFEWDLFWAVHEY----ELL-----YHTFG-RHHF--G-K-----ITA--
-----NLDVFLRRFNEVQYWIVTELVSTPSSLKRVGLVRKFIKLA-
AYCKE-YQNLNAFFAVVMGLSNMAVSRLQQTWEKIPSKFRKIFQEFEALIDPSRNHRAYR
VFVGK--LQP-----PLIPF-MPLLLKDMTFA-----
-----HEGNK--TSL-----D---GLVNFE-KMHMQTM---RTIRFCRSRSLGL-E
PPSP-KS-----EGEVRSYISS-FRVIDNQRVLTAMSQK---VEP-
>Rapgef0_[Drosophila_mojavensis]_968046798
STKELAYHITLFEWDLFWAVHEY----ELL-----YHTFG-RHHF--G-K-----ITA--
-----NLDVFLRRFNEVQYWIVTELVSTPSSLKRVGLVRKFIKLA-
AYCKE-YQNLNAFFAIVMGLSNMAVTRLHQQTWEKIPSKFRKIFQEFEALIDPSRNHRAYR
VFVGK--LQP-----PLIPF-MPLLLKDMTFA-----
-----HEGNK--TSL-----D---GLVNFE-KMHMQTM---RTIRFCRSRSLGL-E
PPSP-KS-----EGEVRSYISS-FRVIDNQRVLTAMSQK---VEP-
>Rapgef0_[Drosophila_persimilis]_195149149
STKELAYHITLFEWDLFYAVHEY----ELL-----YHTFG-RHHF--G-K-----ITA--
-----NLDVFLRRFNEVQYWIVTELVSTPSSLKRVGLVRKFIKLA-
AYCKE-YQNLNAFFAVVMGLSNMAVSRLQQTWEKIPSKFRKIFQEFEALIDPSRNHRAYR
VFVGK--LQP-----PLIPF-MPLLLKDMTFA-----
-----HEGNK--TSL-----D---GLVNFE-KMHMQTM---RTIRFCRSRSLGL-E
PPSP-KS-----EGEVRSYISS-FRVIDNQRVLTAMSQK---VEP-
>Rapgef0_[Drosophila_pseudoobscura_pseudoobscura]_198455898
STKELAYHITLFEWDLFYAVHEY----ELL-----YHTFG-RHHF--G-K-----ITA--
-----NLDVFLRRFNEVQYWIVTELVSTPSSLKRVGLVRKFIKLA-
AYCKE-YQNLNAFFAVVMGLSNMAVSRLQQTWEKIPSKFRKIFQEFEALIDPSRNHRAYR
VFVGK--LQP-----PLIPF-MPLLLKDMTFA-----
-----HEGNK--TSL-----D---GLVNFE-KMHMQTM---RTIRFCRSRSLGL-E
PPSP-KS-----EGEVRSYISS-FRVIDNQRVLTAMSQK---VEP-
>Rapgef0_[Drosophila_sechellia]_195331917
STKELAYHITLFEWDLFWAVHEY----ELL-----YHTFG-RHHF--G-K-----ITA--
-----NLDVFLRRFNEVQYWIVTELVSTPSSLKRVGLVRKFIKLA-
AYCKE-YQNLNAFFAVVMGLSNMAVSRLQQTWEKIPSKFRKIFQEFEALIDPSRNHRAYR
VFVGK--LQP-----PLIPF-MPLLLKDMTFA-----
-----HEGNK--TSL-----D---GLVNFE-KMHMQTM---RTIRFCRSRSLGL-E
PPSP-KS-----EGEVRSYISS-FRVIDNQRVLTAMSQK---VEP-
>Rapgef0_[Drosophila_simulans]_1013905440
STKELAYHITLFEWDLFWAVHEY----ELL-----YHTFG-RHHF--G-K-----ITA--
-----NLDVFLRRFNEVQYWIVTELVSTPSSLKRVGLVRKFIKLA-
AYCKE-YQNLNAFFAVVMGLSNMAVSRLQQTWEKIPSKFRKIFQEFEALIDPSRNHRAYR
VFVGK--LQP-----PLIPF-MPLLLKDMTFA-----
-----HEGNK--TSL-----D---GLVNFE-KMHMQTM---RTIRFCRSRSLGL-E
PPSP-KS-----EGEVRSYISS-FRVIDNQRVLTAMSQK---VEP-
>Rapgef0_[Drosophila_virilis]_968111026
STKELAYHITLFEWDLFWAVHEY----ELL-----YHTFG-RHHF--G-K-----ITA--
-----NLDVFLRRFNEVQYWIVTELVSTPSSLKRVGLVRKFIKLA-
AYCKE-YQNLNAFFAIVMGLSNMAVTRMQQTWEKIPSKFRKIFQEFEALIDPSRNHRAYR
VFVGK--LQP-----PLIPF-MPLLLKDMTFA-----
-----HEGNK--TSL-----D---GLVNFE-KMHMQTM---RTIRFCRSRSLGL-E
PPSP-KS-----EGEVRAYISS-FRVIDNQRVVTAMSQK---VEP-
>Rapgef0_[Drosophila_yakuba]_969526469
STKELAYHITLFEWDLFWAVHEY----ELL-----YHTFG-RHHF--G-K-----ITA--
-----NLDVFLRRFNEVQYWIVTELVSTPSSLKRVGLVRKFIKLA-
AYCKE-YQNLNAFFAVVMGLSNMAVSRLQQTWEKIPSKFRKIFQEFEALIDPSRNHRAYR
VFVGK--LQP-----PLIPF-MPLLLKDMTFA-----

```



-----HEGNK--TSL-----D---GLVNFE-KMHMAQTM---RTIRFCRSRSLGL-E  
PPSP-KS-----EGEVRTYISS-FRVIDNQRVLTAMSQK---VEP-  
>Rapgef0\_[Lottia\_gigantea]\_676496085  
STKELAYQITLYDWELFNALHEF----ELI-----YLVFG-RHRF----N---K-ITA--  
-----NLDLFLRRFNEIQYWVATEMVLCSNVSKRVQLLKKFIKLA-  
AICKE-NKNLHSFFAIVMGLSNIASVRLSQTWEKLPKFKNKLFAEFETVMDPSRNHRVYR  
LTVAK--MNP-----PILPF-MPLLMK-----  
-----  
-----  
>Rapgef0\_[Naegleria\_gruberi]\_290987038  
--QEVARQMSLIDYTMFKKIEPK----ECL-----NQAWN-K-EH----RVTKA-P----  
-----NISMRIQHFNQFSGFVATEILKQEDHEKRVKCVKFIKLA-  
NHCKG-LNNFNAVFSVMGLNSSSIHRLSKTWEAISEEAKKTREELLSITNTNGNFANLR  
NMLKTVN--P-----PCVPY-NGVFLTDLTFI-----  
-----EDGSP--KYI-----N---GLINFG-KCRLFAKVI---RDIQ-----  
-----  
>Rapgef0\_[Necator\_americanus]\_915250685  
NAQVVAQTLTLQDFAVFASIEPT----EYI-----DNLFQ-L-ES----R-YGS-P----  
-----RLEEFERIFNREMWWVATEVCSERVIQKRAKLIKKFIKVA-  
RYCRE-LRNFNMSFMAIMSGLDKPAVRRHLSTWERISGKYIRMLEDIQQLVDPSPRNMSKYR  
QHLEVSQEP-----PVVPI-YPVIKKDLTFS-----  
-----HEGNP--TYC-----D---KLVNFE-KLRLIAKSV---RAVSKLSSAPYEISS  
MAER-----  
>Rapgef0\_[Neotoma\_lepida]\_1040239113  
---DLALELMSFDWSLFSIHEQ----ELI-----YFTFS-RQGS--G-E-----HTV--  
-----NLSLLLQRCNEVQLWVATEILLCSQLGKRVQLVKKFIKIA-  
AHCKA-QQNLNSFFAIVMGLNTASVRLSQTWEKIPGKFKKLFSELESITDPSLNHKAYR  
DAFKK--MKP-----PKIPF-MPLLLKDVTFI-----  
-----HEGNK--TFL-----D---NLVNFE-KLHMIADTV---RTL RHCRSNQFGSDM  
SPKE-----QQELKSYVNH-LYVIDSQQALFELSHR---LEP-  
>Rapgef0\_[Oikopleura\_dioica]\_313238569  
---ELAFQLTIRDYNIFRNVLPT----DYV-----NDIFH-RIGG---QKDPS-HIK--  
-----EMSALESLVNEEMFWVVEVLQETNLHRRANSLKQFIQTC-  
IHLKE-LKNYNSLFAIISGLDHTAVARLKQTAAVSPKNRKKFEELKSLMEPSRNFSTYR  
-SLKQKNEVP-----PLIPF-VPVIKKDLTFS-----  
-----HLGND--TKV-----D---GLINFE-KMRDFAREI---RTL RKYC-----  
-----  
>Rapgef0\_[Oncorhynchus\_mykiss]\_642080378  
SSKDLAYQMTLYDWELFSCVHEH----ELL-----YHTFG-RQSF--R-R-----TTA--  
-----NLDLFLRRFNQVQLWVVEVCLCGQLSKRVQLLKKFIKIA-  
AHCRE-FKNLNSFFAII MGMSNPAVSRLTQTWEKLPKFKKFYAEFESMMDPSRNHRAYR  
LTVTK--IEP-----PIIPF-MPLLLKDMTFS-----  
-----HEGNK--TFI-----D---NMVNFE-KMRVIANTI---RAVRQCRSQPFS---  
-----  
>Rapgef0\_[Pediculus\_humanus\_corporis]\_242021899  
STKELAYHMTDFDWELFCCINEY----EML-----YHVIG-KHHF---GE---L--TA--  
-----NLEMFLRRFNEIQYWVATEILHTQSLSKRVTVLRKLIKLA-  
SYCKE-YQNFNALFLAII TGLNNQAVSRLSLTWEKLPNFKRMFTEFEILIDSSRNHRAYR  
AAVGK--LQP-----PVLPF-MPLLIKDMNCA-----  
-----QENHK--TFT-----D---GLVNFE-KMHLFAQTI---RTMRYSRSRHLTLEP  
PSPKSEG-----NIRSYISC-LRVIDNQQLMSLSQK---LEPR  
>Rapgef0\_[Spizellomyces\_punctatus\_DAOM\_BR117]\_1026975868  
SVEDLSQQLCIHNFKLFHNIHPI----EYL-----NQIWQ-K-TN---E-----SSP--  
-----SMIYFIERFDKESYWASTEILKEKDLKKRTSLLRKFILTA-

KMCQE-LSNFFTMFALIAGLNMPPIQRLKKTWEALPDKAKKAWAELEKVADPSRNMKNYR  
 DLLNA--ATP-----PIVPF-LPIYLKDLTFM-----  
 -----NDGNE--SKI-----GTERQMINFD-KLRMMGNRV---KDI-----  
 -----

>Rapgef0\_[Trichuris\_suis]\_669314000  
 SSAELAQLLIYHWQLFHNTHHEY----ELL-----YQTIG-RNRF--PGR-----LPV--  
 -----NLDLFVRRFNEQLQFWVITEILLCTALSKRAHLVKKFIKIA-  
 LHAKN-SHDLFSFFAITLGLSNVAISRLSQTWEKVSTKFRKQFFEFEGLLDPSRNRHAYR  
 LLVAK--MSP-----PVIPIF-IPLLLKDLLFI-----  
 -----HEGNK--TSF-----E---GMVNFE-KMHMAHTL---RNLRAYKAHAPAIID-  
 ---ASKV-----SPEAQLVHN-FRVIDDQRKFIQMSKA---LEPR  
 >Rapgef0\_[Wuchereria\_bancrofti]\_402583412  
 SSIDIAQQLLIFHTQLLEATDDI----ELI-----TQVFG-REQF--PNR-----ITS--  
 -----NLDLLMRRFNEVQFWTTTEVLLAQSNTRKLSILKKFIKIA-  
 AHAKE-NKDLLSLFAIILGLSNIASRITHLWDKLP SKMKQQYAEFEELLDP CRNHRAYR  
 MLTAN--MSA-----PTVPF-IPLLLKXLTFT-----  
 -----HEGNK--T-----  
 -----

>Rapgef1\_[Acanthisitta\_chloris]\_677291549  
 -SHEIAEQLTLLDAELFYKIE---IPEVLL-----WA-KEQ-----N--EE-KSP--  
 -----NLTQFTEHFNNMSYWVRSIIMLQEKAQDRERLLLKFIKIM-  
 KHLRK-LNNFN SYLA ILSALDSAPIRRLEWQKQTS-----EGLAEYCTLIDSSSSFRAYR  
 AALAD--VEP-----PCIPY-LGLILQDLTFV-----  
 -----HLGNP--DYI-----D---SKVNFS-K-----  
 -----

>Rapgef1\_[Acinonyx\_jubatus]\_961760290  
 -SHEIAEQLTLLDAELFYKIE---IPEVLL-----WA-KEQ-----N--EE-KSP--  
 -----NLTQFTEHFNNMSYWVRSIIMLQEKAQDRERLLLKFIKIM-  
 KHLRK-LNNFN SYLA ILSALDSAPIRRLEWQKQTS-----EGLAEYCTLIDSSSSFRAYR  
 AALSE--VEP-----PCIPY-LGLILQDLTFV-----  
 -----HLGNP--DYI-----D---GKVNFS-KRWQQFNIL---DSMR CFQ-----  
 -----

>Rapgef1\_[Ailuropoda\_melanoleuca]\_752388953  
 -SHEIAEQLTLLDAELFYKIE---IPEVLL-----WA-KEQ-----N--EE-KSP--  
 -----NLTQFTEHFNNMSYWVRSIIMLQEKAQDRERLLLKFIKIM-  
 KHLRK-LNNFN SYLA ILSALDSAPIRRLEWQKQTS-----EGLAEYCTLIDSSSSFRAYR  
 AALSE--VEP-----PCIPY-LGLILQDLTFV-----  
 -----HLGNP--DYI-----D---GKVNFS-KRWQQFNIL---DSMR CFQQA H-----  
 -----YDIRRND DI INFFNDFSDHLAEELWELSLK---IKPR  
 >Rapgef1\_[Alligator\_mississippiensis]\_951018134  
 -AEDIANHLTAFHWELFRCIHEL---EFV-----DYVFHGE-RG---R-RET-A---  
 -----NLELMLQRCSEVQHWVATEILLCEALGKRAHLLKKFVKIA-  
 AICKQ-NQDMLS FYAVVIGLNNAAVSRLRLTWEKLP GKFKNLFRKFENLTDPCR NHKTYR  
 EVLTK--MKP-----PIIPF-VPLILKDLTFL-----  
 -----HEGSK--TLL-----D---GLVNIE-KLHSIAEKV---RTIRKYRS-----  
 -----

>Rapgef1\_[Alligator\_sinensis]\_557283170  
 ---EIAEQLTLLDAELFYKIE---IPEVLL-----WA-KEQ-----N--EE-KSP--  
 -----NLTQFTEHFNNMSYWVRSIIMLQEKAQDRERLLLKFIKIM-  
 KHLRK-LNNFN SYLA ILSALDSAPIRRLEWQKQTS-----EGLAEYCTLIDSSSSFRAYR  
 AALAE--VEP-----PCIPY-LGLILQDLTFV-----  
 -----HLGNP--DYI-----D---GKVNFS-K-----  
 -----

>Rapgef1\_[Anser\_cygnoides\_domesticus]\_902922233

-SHEIAEQLTLLDAELFYKIE---IPEVLL-----WA-KEQ-----N--EE-KSP--  
-----NLTQFTEHFNNMSYWVRSIIMLQEKAQDRERLLLKFIKIM-  
KHLRK-LNNFN SYLA ILSALDSAPIRRLEWQKQTS-----EGLAEYCTLIDSSSSFRAYR  
AALAD--VEP-----PCIPY-LGLILQDLTFV-----  
-----HLGNP--DYI-----D---SKVNFS-K-----  
-----  
>Rapgef1\_[Aquila\_chrysaetos\_canadensis]\_768361773  
-SHEIAEQLTLLDAELFYKIE---IPEVLL-----WA-KEQ-----N--EE-KSP--  
-----NLTQFTEHFNNMSYWVRSIIMLQEKAQDRERLLLKFIKIM-  
KHLRK-LNNFN SYLA ILSALDSAPIRRLEWQKQTS-----EGLAEYCTLIDSSSSFRAYR  
AALAD--VEP-----PCIPY-LGLILQDLTFV-----  
-----HLGNP--DYI-----D---SKVNFS-K-----  
-----  
>Rapgef1\_[Ascaris\_suum]\_541042023  
SSVDIAQQLSIFHTQLFEATDEI----ELV-----TQVFG-RDQF--PGR-----IPS--  
-----NLDLLMRRFNEVQFWTTTEVLLAHGPSKRVAMLK KFIKIA-  
AHAKE-NRDLM SLFA IILGLSNVAVSRITHIWDKLP SKMRRQYAEFEALLDPSRNHRAYR  
MLVAK--MTS-----PTVPF-VPLLLKDLTFT-----  
-----HEGNK--TYF-----A---GLVNFE-KMHMIANVL---RSFRQCKS-KYPVTS  
FDQK--K-----VFESKNLIRN-FKVIDNQRR LMEISYQ---IEP-  
>Rapgef1\_[Balaenoptera\_acutorostrata\_scammoni]\_594694590  
-SHEIAEQLTLLDAELFYKIE---IPEVLL-----WA-KEQ-----N--EE-KSP--  
-----NLTQFTEHFNNMSYWVRSIIMLQEKAQDRERLLLKFIKIM-  
KHLKK-LNNFN SYLA ILSALDSAPIRRLEWQKQTS-----EGLAEYCTLIDSSSSFRAYR  
AALSE--VEP-----PCIPY-LGLILQDLIFL-----  
-----HLGNP--DYI-----D---GKV NFS-KRWQQFNIL---DSMRCFQQA H-----  
-----YDIRNDDI INFFNDFSDHLAEEALWELSLK---IKPR  
>Rapgef1\_[Balearica\_regulorum\_gibbericeps]\_676242958  
-SHEIAEQLTLLDAELFYKIE---IPEVLL-----WA-KEQ-----N--EE-KSP--  
-----NLTQFTEHFNNMSYWVRSIIMLQEKAQDRERLLLKFIKIM-  
KHLRK-LNNFN SYLA ILSALDSAPIRRLEWQKQTS-----EGLAEYCTLIDSSSSFRAYR  
AALAD--VEP-----PCIPY-LGLILQDLTFV-----  
-----HLGNP--DYI-----D---SKVNFS-K-----  
-----  
>Rapgef1\_[Bos\_mutus]\_440900078  
---EIAEQLTLLDAELFYKIE---IPEVLL-----WA-KEQ-----N--EE-KSP--  
-----NLTQFTEHFNNMSYWVRSIIMLQEKAQDRERLLLKFIKIM-  
KHLRK-LNNFN SYLA ILSALDSAPIRRLEWQKQTS-----EGLAEYCTLIDSSSSFRAYR  
AALSE--VEP-----PCIPY-LGLILQDLTFV-----  
-----HLGNP--DYI-----D---GKV NFS-K-----  
-----  
>Rapgef1\_[Bos\_taurus]\_982939844  
---EIAEQLTLLDAELFYKIE---IPEVLL-----WA-KEQ-----N--EE-KSP--  
-----NLTQFTEHFNNMSYWVRSIIMLQEKAQDRERLLLKFIKIM-  
KHLRK-LNNFN SYLA ILSALDSAPIRRLEWQKQTS-----EGLAEYCTLIDSSSSFRAYR  
AALSE--VEP-----PCIPY-LGLILQDLTFV-----  
-----HLGNP--DYI-----D---GKV NFS-K-----  
-----  
>Rapgef1\_[Buceros\_rhinoceros\_silvestris]\_704153824  
---EIAEQLTLLDAELFYKIE---IPEVLL-----WA-KEQ-----N--EE-KSP--  
-----NLTQFTEHFNNMSYWVRSIIMLQEKAQDRERLLLKFIKIM-  
KHLRK-LNNFN SYLA ILSALDSAPIRRLEWQKQTS-----EGLAEYCTLIDSSSSFRAYR  
AALAD--VEP-----PCIPY-LGLILQDLTFV-----  
-----HLGNP--DYI-----D---SKVNFS-K-----

-----  
>Rapgef1\_[Calypste\_anna]\_663253808  
---EIAEQLTLLDAELFYKIE---IPEVLL-----WA-KEQ-----N--EE-KSP--  
-----NLTQFTEHFNNMSYWVRSIIMLQEKAQDRERLLLKFIKIM-  
KHLRK-LNNFN SYLA ILSALDSAPIRRLEWQKQTS-----EGLAEYCTLIDSSSSFRAYR  
AALAD--VDP-----PCIPY-LGLILQDLTFV-----  
-----HLGNP--DYI-----D---SKVNFS-K-----  
-----

>Rapgef1\_[Caprimulgus\_carolinensis]\_704288312  
-SHEIAEQLTLLDAELFYKIE---IPEVLL-----WA-KEQ-----N--EE-KSP--  
-----NLTQFTEHFNNMSYWVRSIIMLQEKAQDRERLLLKFIKIM-  
KHLRK-LNNFN SYLA ILSALDSAPIRRLEWQKQTS-----EGLAEYCTLIDSSSSFRAYR  
AALAD--VEP-----PCIPY-LGLILQDLTFV-----  
-----HLGNP--DYI-----D---NKVNFS-K-----  
-----

>Rapgef1\_[Cariama\_cristata]\_698401251  
---EIAEQLTLLDAELFYKIE---IPEVLL-----WA-KEQ-----N--EE-KSP--  
-----NLTQFTEHFNNMSYWVRSIIMLQEKAQDRERLLLKFIKIM-  
KHLRK-LNNFN SYLA ILSALDSAPIRRLEWQKQTS-----EGLAEYCTLIDSSSSFRAYR  
AALAD--VEP-----PCIPY-LGLILQDLTFV-----  
-----HLGNP--DYI-----D---SKVNFS-K-----  
-----

>Rapgef1\_[Carlito\_syrichtha]\_640785364  
---EIAEQLTLLDAELFYKIE---IPEVLL-----WA-KEQ-----N--EE-KSP--  
-----NLTQFTEHFNNMSYWVRSIIMLQEKAQDRERLLLKFIKIM-  
KHLRK-LNNFN SYLA ILSALDSAPIRRLEWQKQTS-----EGLAEYCTLIDSSSSFRAYR  
AALSE--VEP-----PCIPY-LGLILQDLTFV-----  
-----HLGNP--DYI-----D---GKVNFS-K-----  
-----

>Rapgef1\_[Ceratotherium\_simum\_simum]\_955502909  
-SHEIAEQLTLLDAELFYKIE---IPEVLL-----WA-KEQ-----N--EE-KSP--  
-----NLTQFTEHFNNMSYWVRSIIMLQEKAQDRERLLLKFIKIM-  
KHLRK-LNNFN SYLA ILSALDSAPIRRLEWQKQTS-----EGLAEYCTLIDSSSSFRAYR  
AALSE--VEP-----PCIPY-LGLILQDLTFV-----  
-----HLGNP--DYI-----D---GKVNFS-KRWQQFNIL---DSMR CFQQA H-----  
-----YDIRRNDDIINFNFDFSDHLAE EALWELSLK---IKPR

>Rapgef1\_[Charadrius\_vociferus]\_699697996  
-SHEIAEQLTLLDAELFYKIE---IPEVLL-----WA-KEQ-----N--EE-KSP--  
-----NLTQFTEHFNNMSYWVRSIIMLQEKAQDRERLLLKFIKIM-  
KHLRK-LNNFN SYLA ILSALDSAPIRRLEWQKQTS-----EGLAEYCTLIDSSSSFRAYR  
AALAD--VEP-----PCIPY-LGLILQDLTFV-----  
-----HLGNP--DYI-----D---SKVNFS-K-----  
-----

>Rapgef1\_[Chlamydotis\_macqueenii]\_705662410  
---EIAEQLTLLDAELFYKIE---IPEVLL-----WA-KEQ-----N--EE-KSP--  
-----NLTQFTEHFNNMSYWVRSIIMLQEKAQDRERLLLKFIKIM-  
KHLRK-LNNFN SYLA ILSALDSAPIRRLEWQKQTS-----EGLAEYCTLIDSSSSFRAYR  
AALAD--VEP-----PCIPY-LGLILQDLTFV-----  
-----HLGNP--DYI-----D---SKVNFS-K-----  
-----

>Rapgef1\_[Chlorocebus\_sabaeus]\_635070519  
-SHEIAEQLTLLDAELFYKIE---IPEVLL-----WA-KEQ-----N--EE-KSP--  
-----NLTQFTEHFNNMSYWVRSIIMLQEKAQDRERLLLKFIKIM-  
KHLRK-LNNFN SYLA ILSALDSAPIRRLEWQKQTS-----EGLAEYCTLIDSSSSFRAYR

```

AALSE--VEP-----PCIPY-LGLILQDLTFV-----
-----HLGNP--DYI-----D---GKVNFS-KRWQQFNIL---DSMRCFQQA-----
-----YDIRRNDIINFNDSDHLAEEALWELSLK---IKPR
>Rapgef1_[Clupea_harengus]_831306567
---EVADQLTLLDAELFYKIE---IPEVLL-----WA-KEQ-----N--EE-KSP--
-----NLTQFTEHFNNMSYWVRSVIIQQERAQDREKLLLKFIKIM-
KHLRK-LNNFNLSYLAISALDSAPIRRLEWQKQTS-----EGLEEYCTLIDSSSSFRAYR
AALAD--VEP-----PCIPY-LGLILQDLTFV-----
-----HLGNP--DLV-----E---GKVNFS-K-----
-----
>Rapgef1_[Colius_striatus]_706146434
-SHEIAEQLTLLDAELFYKIE---IPEVLL-----WA-KEQ-----N--EE-KSP--
-----NLTQFTEHFNNMSYWVRSIIMLQEKAQDRERLLLKFIKIM-
KHLRK-LNNFNLSYLAISALDSAPIRRLEWQKQTS-----EGLAEYCTLIDSSSSFRAYR
AALAD--VEP-----PCIPY-LGLILQDLTFV-----
-----HLGNP--DYI-----D---SKVNFS-K-----
-----
>Rapgef1_[Columba_livia]_543744181
---EIAEQLTLLDAELFYKIE---IPEVLL-----WA-KEQ-----N--EE-KSP--
-----NLTQFTEHFNNMSYWVRSIIMLQEKAQDRERLLLKFIKIM-
KHLRK-LNNFNLSYLAISALDSAPIRRLEWQKQTS-----EGLAEYCTLIDSSSSFRAYR
AALAD--VEP-----PCIPY-LGLILQDLTFV-----
-----HLGNP--DYI-----D---NKVNFS-K-----
-----
>Rapgef1_[Corvus_cornix_cornix]_727012745
-SHEIAEQLTLLDAELFYKIE---IPEVLL-----WA-KEQ-----N--EE-KSP--
-----NLTQFTEHFNNMSYWVRSIIMLQEKAQDRERLLLKFIKIM-
KHLRK-LNNFNLSYLAISALDSAPIRRLEWQKQTS-----EGLAEYCTLIDSSSSFRAYR
AALAD--VEP-----PCIPY-LGLILQDLTFV-----
-----HLGNP--DYI-----D---SKVNFS-K-----
-----
>Rapgef1_[Cricetulus_griseus]_1032921614
---EIAEQLTLLDAELFYKIE---IPEVLL-----WA-KEQ-----N--EE-KSP--
-----NLTQFTEHFNNMSYWVRSIIMLQEKAQDRERLLLKFIKIM-
KHLRK-LNNFNLSYLAISALDSAPIRRLEWQKQTS-----EGLAEYCTLIDSSSSFRAYR
AALSE--VEP-----PCIPY-LGLILQDLTFV-----
-----HLGNP--DYI-----D---GKVNFS-K-----
-----
>Rapgef1_[Danio_rerio]_688566951
---EIADQLTLLDAELFYKIE---IPEVLL-----WA-KEQ-----N--EE-KSP--
-----NLTQFTEHFNNMSYWVRSIIILQEKAQDREKLLLKFIKIM-
KHLRK-LNNFNLSYLAISALDSAPIRRLEWQKQTS-----EGLEEYCTLIDSSSSFRAYR
AALAD--VEP-----PCIPY-LGLILQDLTFV-----
-----HLGNP--DHI-----E---GKINFS-K-----
-----
>Rapgef1_[Dasypus_novemcinctus]_488553799
-SHEIAEQLTLLDAELFYKIE---IPEVLL-----WA-KEQ-----N--EE-KSP--
-----NLTQFTEHFNNMSYWVRSIIMLQEKAQDRERLLLKFIKIM-
KHLRK-LNNFNLSYLAISALDSAPIRRLEWQKQTS-----EGLAEYCTLIDSSSSFRAYR
AALSE--VEP-----PCIPY-LGLILQDLTFV-----
-----HLGNP--DYI-----D---GKVNFS-KRWQQFNIL---DSMRCFQQA-----
-----YDIRRNDIINFNDSDHLAEEALWELSLK---IKPR
>Rapgef1_[Eptesicus_fuscus]_641722335
-SHEIAEQLTLLDAELFYKIE---IPEVLL-----WA-KEQ-----N--EE-KSP--

```

```

-----NLTQFTEHFNNMSYWVRSIIMLQEKAQDRERLLLKFIKIM-
KHLRK-LNNFN SYLA ILSALDSAPIRRLEWQKQTS-----EGLAEYCTLIDSSSSFRAYR
AALSE--VEP-----PCIPY-LGLILQDLTFV-----
-----HLGNP--DYI-----D---GKVNFS-KRWQQFNIL---DSMRCFQQA-----
-----YDIRNDDIINFFNDFSDHLAEALWELSLK---IKPR
>Rapgef1_[Equus_asinus]_958773773
---EIAEQLTLLDAELFYKIE---IPEVLL-----WA-KEQ-----N--EE-KSP--
-----NLTQFTEHFNNMSYWVRSIIMLQEKAQDRERLLLKFIKIM-
KHLRK-LNNFN SYLA ILSALDSAPIRRLEWQKQTS-----EGLAEYCTLIDSSSSFRAYR
AALSE--VEP-----PCIPY-LGLILQDLTFV-----
-----HLGNP--DYI-----D---GKVNFS-K-----
-----
>Rapgef1_[Equus_caballus]_194225954
---EIAEQLTLLDAELFYKIE---IPEVLL-----WA-KEQ-----N--EE-KSP--
-----NLTQFTEHFNNMSYWVRSIIMLQEKAQDRERLLLKFIKIM-
KHLRK-LNNFN SYLA ILSALDSAPIRRLEWQKQTS-----EGLAEYCTLIDSSSSFRAYR
AALSE--VEP-----PCIPY-LGLILQDLTFV-----
-----HLGNP--DYI-----D---GKVNFS-K-----
-----
>Rapgef1_[Esox_lucius]_742225031
---EIADQLTLLDAELFYKIE---IPEVLL-----WA-KEQ-----N--EE-KSP--
-----NLTQFTEHFNNMSYWVRSIIQQEKAQDREKLLLKFIKIM-
KHLRK-LNNFN SYLA ILSALDSAPIRRLEWQKQTS-----EGLEEYCTLIDSSSSFRAYR
AALAD--VEP-----PCIPY-LGLILQDLTFV-----
-----HLGNP--DLI-----E---GKVNFS-K-----
-----
>Rapgef1_[Eurypyga_helias]_704286424
---EIAEQLTLLDAELFYKIE---IPEVLL-----WA-KEQ-----N--EE-KSP--
-----NLTQFTEHFNNMSYWVRSIIMLQEKAQDRERLLLKFIKIM-
KHLRK-LNNFN SYLA ILSALDSAPIRRLEWQKQTS-----EGLAEYCTLIDSSSSFRAYR
AALAD--VEP-----PCIPY-LGLILQDLTFV-----
-----HLGNP--DYI-----D---SKVNFS-K-----
-----
>Rapgef1_[Ficedula_albicollis]_1020958161
-SHEIAEQLTLLDAELFYKIE---IPEVLL-----WA-KEQ-----N--EE-KSP--
-----NLTQFTEHFNNMSYWVRSIIMLQEKAQDRERLLLKFIKIM-
KHLRK-LNNFN SYLA ILSALDSAPIRRLEWQKQTS-----EGLAEYCTLIDSSSSFRAYR
AALAD--VEP-----PCIPY-LGLILQDLTFV-----
-----HLGNP--DYI-----D---SKVNFS-K-----
-----
>Rapgef1_[Fukomys_damarensis]_731223266
---EIAEQLTLLDAELFYKIE---IPEVLL-----WA-KEQ-----N--EE-KSP--
-----NLTQFTEHFNNMSYWVRSIIMLQEKAQDRERLLLKFIKIM-
KHLRK-LNNFN SYLA ILSALDSAPIRRLEWQKQTS-----EGLAEYCTLIDSSSSFRAYR
AALSE--VEP-----PCIPY-LGLILQDLTFV-----
-----HLGNP--DYV-----D---GKVNFS-K-----
-----
>Rapgef1_[Fundulus_heteroclitus]_831537766
---EIADQLTLLDAELFYKIE---IPEVLL-----WA-KEQ-----N--EE-KSP--
-----NLTQFTEHFNNMSYWVRSIIQQEKAQDREKLLLKFIKIM-
KHLRK-LNNFN SYLA ILSALDSAPIRRLEWQKQTS-----DGLEEYCTLIDSSSSFRAYR
AALAE--VEP-----PCIPY-LGLILQDLTFV-----
-----HLGNP--DLI-----D---GKVNFS-K-----
-----

```

```

>Rapgef1_[Galeopterus_variegatus]_667337446
---EIAEQLTLLDAELFYKIE---IPEVLL-----WA-KEQ-----N--EE-KSP--
-----NLTQFTEHFNNMSYWVRSIIMLQEKAQDRERLLLKFIKIM-
KHLRK-LNNFNNSYLAILSDSAPIRRLEWQKQTS-----EGLAEYCTLIDSSSSFRAYR
AALSE--VEP-----PCIPY-LGLILQDLTFV-----
-----HLGNP--DYI-----D---GKVNFS-K-----
-----

>Rapgef1_[Geospiza_fortis]_543261235
-SHEIAEQLTLLDAELFYKIE---IPEVLL-----WA-KEQ-----N--EE-KSP--
-----NLTQFTEHFNNMSYWVRSIIMLQEKAQDRERLLLKFIKIM-
KHLRK-LNNFNNSYLAILSDSAPIRRLEWQKQTS-----EGLAEYCTLIDSSSSFRAYR
AALAD--VEP-----PCIPY-LGLILQDLTFV-----
-----HLGNP--DYI-----D---SKVNFS-K-----
-----

>Rapgef1_[Haliaeetus_leucocephalus]_729745536
-SHEIAEQLTLLDAELFYKIE---IPEVLL-----WA-KEQ-----N--EE-KSP--
-----NLTQFTEHFNNMSYWVRSIIMLQEKAQDRERLLLKFIKIM-
KHLRK-LNNFNNSYLAILSDSAPIRRLEWQKQTS-----EGLAEYCTLIDSSSSFRAYR
AALAD--VEP-----PCIPY-LGLILQDLTFV-----
-----HLGNP--DYI-----D---SKVNFS-K-----
-----

>Rapgef1_[Heterocephalus_glaber]_512974084
---EIAEQLTLLDAELFYKIE---IPEVLL-----WA-KEQ-----N--EE-KSP--
-----NLTQFTEHFNNMSYWVRSIIMLQEKAQDRERLLLKFIKIM-
KHLRK-LNNFNNSYLAILSDSAPIRRLEWQKQTS-----EGLAEYCTLIDSSSSFRAYR
AALSE--VEP-----PCIPY-LGLILQDLTFV-----
-----HLGNP--DYV-----E---GKVNFS-K-----
-----

>Rapgef1_[Ictidomys_tridecemlineatus]_532070648
-SHEIAEQLTLLDAELFYKIE---IPEVLL-----WA-KEQ-----N--EE-KSP--
-----NLTQFTEHFNNMSYWVRSIIMLQEKAQDRERLLLKFIKIM-
KHLRK-LNNFNNSYLAILSDSAPIRRLEWQKQTS-----EGLAEYCTLIDSSSSFRAYR
AALSE--VEP-----PCIPY-LGLILQDLTFV-----
-----HLGNP--DYI-----D---GKVNFS-KRWQQFNIL---DSMRCFQQAHAH---
-----YDIRRNDIINFNDFSDHLAEALWELSLK---IKPR

>Rapgef1_[Jaculus_jaculus]_507540166
---EIAEQLTLLDAELFYKIE---IPEVLL-----WA-KEQ-----N--EE-KSP--
-----NLTQFTEHFNNMSYWVRSIIMLQEKAQDRERLLLKFIKIM-
KHLRK-LNNFNNSYLAILSDSAPIRRLEWQKQTS-----EGLAEYCTLIDSSSSFRAYR
AALSE--VEP-----PCIPY-LGLILQDLTFV-----
-----HLGNP--DYI-----D---GKVNFS-K-----
-----

>Rapgef1_[Kryptolebias_marmoratus]_1041071222
---EVADQLTLLDAELFYKIE---IPEVLL-----WA-KEQ-----N--EE-KSP--
-----NLTQFTEHFNNMSYWVRSIIQQEKAQDREKLLLKFIKIM-
KHLRK-LNNFNNSYLAILSDSAPIRRLEWQKQTS-----EGLEEYCTLIDSSSSFRAYR
AALAE--VEP-----PCIPY-LGLILQDLTFV-----
-----HLGNP--DLI-----D---GKVNFS-K-----
-----

>Rapgef1_[Leptonychotes_weddellii]_585165118
-SHEIAEQLTLLDAELFYKIE---IPEVLL-----WA-KEQ-----N--EE-KSP--
-----NLTQFTEHFNNMSYWVRSIIMLQEKAQDRERLLLKFIKIM-
KHLRK-LNNFNNSYLAILSDSAPIRRLEWQKQTS-----EGLAEYCTLIDSSSSFRAYR
AALSE--VEP-----PCIPY-LGLILQDLTFV-----

```

```
-----HLGNP--DYI-----D---GKVNFS-KRWQQFNIL---DSMRCFQQA-----
-----YDIRRNDDIINFFNDFSDHLAEEALWELSLK---IKPR
>Rapgef1_[Loa_loa]_393908590
SSIDIAQQLLIFHTQLFEATDDI----ELI-----TQVFG-REQF--PNR-----ITS--
-----NLDLLMRRFNEVQFWTTTEVLLAQGNARLSILKKFIKIA-
AHAKE-NKDLLSLFAIILGLSNVAVSRITHLWDKLP SKMKQQYAEFEELLDPCRNHRAYR
MLTAN--MSA-----PTVPF-IPLLLKDLTFT-----
-----HEGNK--TYF-----A---GLINFE-KMHMIANVL---RGFRQCK---YPAPA
FE-R--K-----VFKSKNLVRN-FKVIDNQRRLMELSYQ---IEP-
>Rapgef1_[Macaca_mulatta]_966990136
-SHEIAEQLTLLDAELFYKIE---IPEVLL-----WA-KEQ-----N--EE-KSP--
-----NLTQFTEHFNNMSYWVRSIIMLQEKAQDRERLLLKFIKIM-
KHLRK-LNNFN SYLA ILSALDSAPIRRLEWQKQTS-----EGLAEYCTLIDSSSF RAYR
AALSE--VEP-----PCIPY-LGLILQDLTFV-----
-----HLGNP--DYI-----D---GKVNFS-KRWQQFNIL---DSMRCFQQA-----
-----YDIRRNDDIINFFNDFSDHLAEEALWELSLK---IKPR
>Rapgef1_[Maylandia_zebra]_835915294
---EIADQLTLLDAELFYKIE---IPEVLL-----WA-KEQ-----N--EE-KSP--
-----NLTQFTEHFNNMSYWVRSLIIQQEKAQDREKLLLKFIKIM-
KHLRK-LNNFN SYLA ILSALDSAPIRRLEWQKQTS-----EGLEEYCTLIDSSSF RAYR
AALAE--VEP-----PCIPY-LGLILQDLTFV-----
-----HLGNP--DLI-----D---GKVNFS-K-----
-----
>Rapgef1_[Melopsittacus_undulatus]_527256067
-SHEIAEQLTLLDAELFYKIE---IPEVLL-----WA-KEQ-----N--EE-KSP--
-----NLTQFTEHFNNMSYWVRSIIMLQEKAQDRERLLLKFIKIM-
KHLRK-LNNFN SYLA ILSALDSAPIRRLEWQKQTS-----EGLAEYCTLIDSSSF RAYR
AALAD--VEP-----PCIPY-LGLILQDLTFV-----
-----HLGNP--DYI-----D---SKVNFS-K-----
-----
>Rapgef1_[Merops_nubicus]_677440357
-SHEIAEQLTLLDAELFYKIE---IPEVLL-----WA-KEQ-----N--EE-KSP--
-----NLTQFTEHFNNMSYWVRSIIMLQEKAQDRERLLLKFIKIM-
KHLRK-LNNFN SYLA ILSALDSAPIRRLEWQKQTS-----EGLAEYCTLIDSSSF RAYR
AALAD--VEP-----PCIPY-LGLILQDLTFV-----
-----HLGNP--DYI-----D---SKVNFS-K-----
-----
>Rapgef1_[Monodelphis_domestica]_611977953
-SHEIAEQLTLLDAELFYKIE---IPEVLL-----WA-KEQ-----N--EE-KSP--
-----NLTQFTEHFNNMSYWVRSIIMLQEKAQDRERLLLKFIKIM-
KHLRK-LNNFN SYLA ILSALDSAPIRRLEWQKQTS-----EGLAEYCTLIDSSSF RAYR
AALSE--VEP-----PCIPY-LGLILQDLTFV-----
-----HLGNP--DYI-----D---GKVNFS-KRWQQFNIL---DSMRCFQQA-----
-----YEIRRNEDIVNFFNDFSDHLAEEALWELSLK---IKPR
>Rapgef1_[Mus_musculus]_568912752
---EIAEQLTLLDAELFYKIE---IPEVLL-----WA-KEQ-----N--EE-KSP--
-----NLTQFTEHFNNMSYWVRSIIMLQEKAQDRERLLLKFIKIM-
KHLRK-LNNFN SYLA ILSALDSAPIRRLEWQKQTS-----EGLAEYCTLIDSSSF RAYR
AALSE--VEP-----PCIPY-LGLILQDLTFV-----
-----HLGNP--DYI-----D---GKVNFS-K-----
-----
>Rapgef1_[Mustela_putorius_furo]_511874071
-SHEIAEQLTLLDAELFYKIE---IPEVLL-----WA-KEQ-----N--EE-KSP--
-----NLTQFTEHFNNMSYWVRSIIMLQEKAQDRERLLLKFIKIM-
```



KHLRK-LNNFNSYLAILLSALDSAPIRRLEWQKQTS-----EGLAEYCTLIDSSSSFRAYR  
 AALSE--VEP-----PCIPY-LGLILQDLTFV-----  
 -----HLGNP--DYI-----D---GKVNFS-KRWQQFNIL---DSMRCFQQAHA-----  
 -----YDIRRNEDIINFFNDFSDHLAEEALWELSLK---IKPR  
 >Rapgef1\_[Myotis\_lucifugus]\_940778357  
 -SHEIAEQLTLLDAELFYKIE---IPEVLL-----WA-KEQ-----N--EE-KSP--  
 -----NLTQFTEHFNNMSYWVRSLIIMLQEKAQDRERLLLKFIKIM-  
 KHLRK-LNNFNSYLAILLSALDSAPIRRLEWQKQTS-----EGLAEYCTLIDSSSSFRAYR  
 AALSE--VEP-----PCIPY-LGLILQDLTFV-----  
 -----HLGNP--DYI-----D---GKVNFS-KRWQQFNIL---DSMRCFQQAHA-----  
 -----YDIRRNDDIINFFNDFSDHLAEEALWELSLK---IKPR  
 >Rapgef1\_[Neolamprologus\_brichardi]\_584003669  
 ---EIADQLTLLDAELFYKIE---IPEVLL-----WA-KEQ-----N--EE-KSP--  
 -----NLTQFTEHFNNMSYWVRSLIIQQEKAQDREKLLLKFIKIM-  
 KHLRK-LNNFNSYLAILLSALDSAPIRRLEWQKQTS-----EGLEEYCTLIDSSSSFRAYR  
 AALAE--VEP-----PCIPY-LGLILQDLTFV-----  
 -----HLGNP--DLI-----D---GKVNFS-K-----  
 -----  
 >Rapgef1\_[Nothobranchius\_furzeri]\_1007713379  
 ---EIADQLTLLDAELFYKIE---IPEVLL-----WA-KEQ-----N--EE-KSP--  
 -----NLTQFTEHFNNMSYWVRSLIIQQEKAQDREKLLLKFIKIM-  
 KHLRK-LNNFNSYLAILLSALDSAPIRRLEWQKQTS-----EGLEEYCTLIDSSSSFRAYR  
 AALAE--VEP-----PCIPY-LGLILQDLTFV-----  
 -----HLGNP--DLI-----D---GKVNFS-K-----  
 -----  
 >Rapgef1\_[Notothenia\_coriiceps]\_736310365  
 ---EIADQLTLLDAELFYKIEVLEIPEVLL-----WA-KEQ-----N--EE-KSP--  
 -----NLTQFTEHFNNMSYWVRSLIIQQEKAQDREKLLLKFIKIM-  
 KHLRK-LNNFNSYLAILLSALDSAPIRRLEWQKQTS-----EGLEEYCTLIDSSSSFRAYR  
 AALSE--VEP-----PCIPY-LGLILQDLTFV-----  
 -----HLGNP--DFI-----E---GKVNFS-K-----  
 -----  
 >Rapgef1\_[Ochotona\_princeps]\_837824864  
 -SHEIAEQLTLLDAELFYKIE---IPEVLL-----WA-KEQ-----N--EE-KSP--  
 -----NLTQFTEHFNNMSYWVRSLIIMLQEKAQDRERLLLKFIKIM-  
 KHLRK-LNNFNSYLAILLSALDSAPIRRLEWQKQTS-----EGLAEYCTLIDSSSSFRAYR  
 AALSE--VEP-----PCIPY-LGLILQDLTFV-----  
 -----HLGNP--DHI-----D---GKVNFS-KRWQQFNIL---DSMRCFQQAHA-----  
 -----YDIRRNDDIINFFNDFSDHLAEEALWELSLK---IKPR  
 >Rapgef1\_[Octodon\_degus]\_820983544  
 ---EIAEQLTLLDAELFYKIE---IPEVLL-----WA-KEQ-----N--EE-KSP--  
 -----NLTQFTEHFNNMSYWVRSLIIMLQEKAQDRERLLLKFIKIM-  
 KHLRK-LNNFNSYLAILLSALDSAPIRRLEWQKQTS-----EGLAEYCTLIDSSSSFRAYR  
 AALSE--VEP-----PCIPY-LGLILQDLTFV-----  
 -----HLGNP--DYV-----D---GKVNFS-K-----  
 -----  
 >Rapgef1\_[Odobenus\_rosmarus\_divergens]\_823391946  
 -SHEIAEQLTLLDAELFYKIE---IPEVLL-----WA-KEQ-----N--EE-KSP--  
 -----NLTQFTEHFNNMSYWVRSLIIMLQEKAQDRERLLLKFIKIM-  
 KHLRK-LNNFNSYLAILLSALDSAPIRRLEWQKQTS-----EGLAEYCTLIDSSSSFRAYR  
 AALSE--VEP-----PCIPY-LGLILQDLTFV-----  
 -----HLGNP--DYI-----D---GKVNFS-KRWQQFNIL---DSMRCFQQAHA-----  
 -----YDIRRNDDIINFFNDFSDHLAEEALWELSLK---IKPR  
 >Rapgef1\_[Opisthocomus\_hoazin]\_700373687

-SHEIAEQLTLLDAELFYKIE---IPEVLL-----WA-KEQ-----N--EE-KSP--  
-----NLTQFTEHFNNMSYWVRSIIMLQEKAQDRERLLLKFIKIM-  
KHLRK-LNNFN SYLA ILSALDSAPIRRLEWQKQTS-----EGLAEYCTLIDSSSSFRAYR  
AALAD--VEP-----PCIPY-LGLILQDLTFV-----  
-----HLGNP--DYI-----D---SKVNFS-K-----  
-----

>Rapgef1\_[Ornithorhynchus\_anatinus]\_620943894

---EIAEQLTLLDAELFYKIE---IPEVLL-----WA-KEQ-----N--EE-KSP--  
-----NLTQFTEHFNNMSYWVRSIIMLQEKAQDRERLLLKFIKIM-  
KHLRK-LNNFN SYLA ILSALDSAPIRRLEWQKQTS-----EGLAEYCTLIDSSSSFRAYR  
AALSE--VEP-----PCIPY-LGLILQDLTFV-----  
-----HLGNP--DYI-----D---GKVNFS-K-----  
-----

>Rapgef1\_[Ovis\_aries\_musimon]\_803226629

---EIAEQLTLLDAELFYKIE---IPEVLL-----WA-KEQ-----N--EE-KSP--  
-----NLTQFTEHFNNMSYWVRSIIMLQEKAQDRERLLLKFIKIM-  
KHLRK-LNNFN SYLA ILSALDSAPIRRLEWQKQTS-----EGLAEYCTLIDSSSSFRAYR  
AALSE--VEP-----PCIPY-LGLILQDLTFV-----  
-----HLGNP--DYI-----D---GKVNFS-K-----  
-----

>Rapgef1\_[Pan\_paniscus]\_675769199

-SHEIAEQLTLLDAELFYKIE---IPEVLL-----WA-KEQ-----N--EE-KSP--  
-----NLTQFTEHFNNMSYWVRSIIMLQEKAQDRERLLLKFIKIM-  
KHLRK-LNNFN SYLA ILSALDSAPIRRLEWQKQTS-----EGLAEYCTLIDSSSSFRAYR  
AALSE--VEP-----PCIPY-LGLILQDLTFV-----  
-----HLGNP--DYI-----D---GKVNFS-KRWQQFNIL---DSMR CFQQA H---  
-----YDIRRNDDI INFFNDFSDHLAE EALWELSLK---IKPR

>Rapgef1\_[Papio\_anubis]\_685591345

-SHEIAEQLTLLDAELFYKIE---IPEVLL-----WA-KEQ-----N--EE-KSP--  
-----NLTQFTEHFNNMSYWVRSIIMLQEKAQDRERLLLKFIKIM-  
KHLRK-LNNFN SYLA ILSALDSAPIRRLEWQKQTS-----EGLAEYCTLIDSSSSFRAYR  
AALSE--VEP-----PCIPY-LGLILQDLTFV-----  
-----HLGNP--DYI-----D---GKVNFS-KRWQQFNIL---DSMR CFQQA H---  
-----YDIRRNDDI INFFNDFSDHLAE EALWELSLK---IKPR

>Rapgef1\_[Parus\_major]\_998724189

-SHEIAEQLTLLDAELFYKIE---IPEVLL-----WA-KEQ-----N--EE-KSP--  
-----NLTQFTEHFNNMSYWVRSIIMLQEKAQDRERLLLKFIKIM-  
KHLRK-LNNFN SYLA ILSALDSAPIRRLEWQKQTS-----EGLAEYCTLIDSSSSFRAYR  
AALAD--VEP-----PCIPY-LGLILQDLTFV-----  
-----HLGNP--DYI-----D---SKVNFS-K-----  
-----

>Rapgef1\_[Pelecanus\_crispus]\_694646979

---EIAEQLTLLDAELFYKIE---IPEVLL-----WA-KEQ-----N--EE-KSP--  
-----NLTQFTEHFNNMSYWVRSIIMLQEKAQDRERLLLKFIKIM-  
KHLRK-LNNFN SYLA ILSALDSAPIRRLEWQKQTS-----EGLAEYCTLIDSSSSFRAYR  
AALAD--VEP-----PCIPY-LGLILQDLTFV-----  
-----HLGNP--DYI-----D---NKVNFS-K-----  
-----

>Rapgef1\_[Peromyscus\_maniculatus\_bairdii]\_1008767945

---EIAEQLTLLDAELFYKIE---IPEVLL-----WA-KEQ-----N--EE-KSP--  
-----NLTQFTEHFNNMSYWVRSIIMLQEKAQDRERLLLKFIKIM-  
KHLRK-LNNFN SYLA ILSALDSAPIRRLEWQKQTS-----EGLAEYCTLIDSSSSFRAYR  
AALSE--VEP-----PCIPY-LGLILQDLTFV-----  
-----HLGNP--DYI-----D---GKVNFS-K-----

-----  
>Rapgef1\_[Phaethon\_lepturus]\_723138787  
-SHEIAEQLTLLDAELFYKIE---IPEVLL-----WA-KEQ-----N--EE-KSP--  
-----NLTQFTEHFNNMSYWVRSIIMLQEKAQDRERLLLKFIKIM-  
KHLRK-LNNFNLSYLAISALDSAPIRRLEWQKQTS-----EGLAEYCTLIDSSSSFRAYR  
AALAD--VEP-----PCIPY-LGLILQDLTFV-----  
-----HLGNP--DYI-----D---SKVNFS-K-----  
-----

>Rapgef1\_[Phalacrocorax\_carbo]\_695141004  
---EIAEQLTLLDAELFYKIE---IPEVLL-----WA-KEQ-----N--EE-KSP--  
-----NLTQFTEHFNNMSYWVRSIIMLQEKQDRERLLLKFIKIM-  
KHLRK-LNNFNLSYLAISALDSAPIRRLEWQKQTS-----EGLAEYCTLIDSSSSFRAYR  
AALAD--VEP-----PCIPY-LGLILQDLTFV-----  
-----HLGNP--DYI-----D---SKVNFS-K-----  
-----

>Rapgef1\_[Phoenicopterus\_ruber\_ruber]\_677495181  
-SHEIAEQLTLLDAELFYKIE---IPEVLL-----WA-KEQ-----N--EE-KSP--  
-----NLTQFTEHFNNMSYWVRSIIMLQEKAQDRERLLLKFIKIM-  
KHLRK-LNNFNLSYLAISALDSAPIRRLEWQKQTS-----EGLAEYCTLIDSSSSFRAYR  
AALAD--VEP-----PCIPY-LGLILQDLTFV-----  
-----HLGNP--DYI-----D---SKVNFS-K-----  
-----

>Rapgef1\_[Physeter\_catodon]\_593753470  
-SHEIAEQLTLLDAELFYKIE---IPEVLL-----WA-KEQ-----N--EE-KSP--  
-----NLTQFTEHFNNMSYWVRSIIMLQEKAQDRERLLLKFIKIM-  
KHLRK-LNNFNLSYLAISALDSAPIRRLEWQKQTS-----EGLAEYCTLIDSSSSFRAYR  
AALSE--VEP-----PCIPY-LGLILQDLTFV-----  
-----HLGNP--DYI-----D---GKVNFS-KRWQQFNIL---DSMRCFQQAHAH-----  
-----YDIRRNDIINFNDFSDHLAEALWELSLK---IKPR

>Rapgef1\_[Poecilia\_latipinna]\_961885811  
---EIADQLTLLDAELFYKIE---IPEVLL-----WA-KEQ-----N--EE-KSP--  
-----NLTQFTEHFNNMSYWVRSIIQQEKAQDREKLLLKFIKIM-  
KHLRK-LNNFNLSYLAISALDSAPIRRLEWQKQTS-----EGLEEYCTLIDSSSSFRAYR  
AALAE--VEP-----PCIPY-LGLILQDLTFV-----  
-----HLGNP--DLI-----D---GKVNFS-K-----  
-----

>Rapgef1\_[Poecilia\_mexicana]\_961888169  
---EIADQLTLLDAELFYKIE---IPEVLL-----WA-KEQ-----N--EE-KSP--  
-----NLTQFTEHFNNMSYWVRSIIQQEKAQDREKLLLKFIKIM-  
KHLRK-LNNFNLSYLAISALDSAPIRRLEWQKQTS-----EGLEEYCTLIDSSSSFRAYR  
AALAE--VEP-----PCIPY-LGLILQDLTFV-----  
-----HLGNP--DLI-----D---GKVNFS-K-----  
-----

>Rapgef1\_[Pongo\_abelii]\_686731902  
-SHEIAEQLTLLDAELFYKIE---IPEVLL-----WA-KEQ-----N--EE-KSP--  
-----NLTQFTEHFNNMSYWVRSIIMLQEKAQDRERLLLKFIKIM-  
KHLRK-LNNFNLSYLAISALDSAPIRRLEWQKQTS-----EGLAEYCTLIDSSSSFRAYR  
AALSE--VEP-----PCIPY-LGLILQDLTFV-----  
-----HLGNP--DYI-----D---GKVNFS-KRWQQFNIL---DSMRCFQQAHAH-----  
-----YD-----

>Rapgef1\_[Pseudopodoces\_humilis]\_929474213  
---EIAEQLTLLDAELFYKIE---IPEVLL-----WA-KEQ-----N--EE-KSP--  
-----NLTQFTEHFNNMSYWVRSIIMLQEKAQDRERLLLKFIKIM-  
KHLRK-LNNFNLSYLAISALDSAPIRRLEWQKQTS-----EGLAEYCTLIDSSSSFRAYR

AALAD--VEP-----PCIPY-LGLILQDLTFV-----  
-----HLGNP--DYI-----D---SKVNFS-K-----  
-----  
>Rapgef1\_[Pterocles\_gutturalis]\_678138997  
-SHEIAEQLTLLDAELFYKIE---IPEVLL-----WA-KEQ-----N--EE-KSP--  
-----NLTQFTEHFNNMSYWVRSIIMLQEKAQDRERLLLKFIKIM-  
KHLRK-LNNFNLSYLAISALDSAPIRRLEWQKQTS-----EGLAEYCTLIDSSSSFRAYR  
AALAD--VEP-----PCIPY-LGLILQDLTFV-----  
-----HLGNP--DYI-----D---NKVNFS-K-----  
-----  
>Rapgef1\_[Rattus\_norvegicus]\_672016556  
---EIAEQLTLLDAELFYKIE---IPEVLL-----WA-KEQ-----N--EE-KSP--  
-----NLTQFTEHFNNMSYWVRSVIMLQEKAQDRERLLLKFIKIM-  
KHLRK-LNNFNLSYLAISALDSAPIRRLEWQKQTS-----EGLAEYCTLIDSSSSFRAYR  
AALSE--VEP-----PCIPY-LGLILQDLTFV-----  
-----HLGNP--DYI-----D---GKVNFS-K-----  
-----  
>Rapgef1\_[Rhinopithecus\_roxellana]\_724871904  
-SHEIAEQLTLLDAELFYKIE---IPEVLL-----WA-KEQ-----N--EE-KSP--  
-----NLTQFTEHFNNMSYWVRSIIMLQEKAQDRERLLLKFIKIM-  
KHLRK-LNNFNLSYLAISALDSAPIRRLEWQKQTS-----EGLAEYCTLIDSSSSFRAYR  
AALSE--VEP-----PCIPY-LGLILQDLTFV-----  
-----HLGNP--DYI-----D---GKVNFS-KRWQQFNIL---DSMRCFQQAHA-----  
-----YDIRRNDDIINFFNDFSDHLAEELWELSLK---IKPR  
>Rapgef1\_[Saimiri\_boliviensis\_boliviensis]\_725551265  
-SHEIAEQLTLLDAELFYKIE---IPEVLL-----WA-KEQ-----N--EE-KSP--  
-----NLTQFTEHFNNMSYWVRSIIMLQEKAQDRERLLLKFIKIM-  
KHLRK-LNNFNLSYLAISALDSAPIRRLEWQKQTS-----EGLAEYCTLIDSSSSFRAYR  
AALSE--VEP-----PCIPY-LGLILQDLTFV-----  
-----HLGNP--DYI-----D---GKVNFS-KRWQQFNIL---DSMRRFQQAHA-----  
-----YDIRRNDDIINFFNDFSDHLAEELWELSLK---IKPR  
>Rapgef1\_[Scleropages\_formosus]\_938060232  
SAEEVANQLVAFDRELVGCIHEV----EFV-----SYVFQ-WEQA--RWR-----PL--  
-----NLELVLQRCSEVQHWVATEILQCQSLPKRLQLLRKFIKIA-  
ALCKQ-QQDLLSFLAVVLGLDNPAVSRLRLTWESLPGKFKKQFQQFEAVADPSRNHKSRY  
DLTAS--LQP-----PIIPF-IPLLLKDLTFL-----  
-----NESCK--TFH-----G---ELVNFE-KMHKIAEMV---RGIRRYRSSQLAVDS  
EPSP--S-----YLQTKAYVRQ-LQVIDNQNLFFELSCK---LEPK  
>Rapgef1\_[Sinocyclocheilus\_anshuiensis]\_1025025898  
---EIADQLTLLDAELFYKIE---IPEVLL-----WA-KEQ-----N--EE-KSP--  
-----NLTQFTEHFNNMSYWVRSIIQQEKAQDREKLLLKFIKIM-  
KHLRK-LNNFNLSYLAISALDSAPIRRLEWQKQTS-----EGLEEYCTLIDSSSSFRAYR  
AALAD--VEP-----PCIPY-LGLILQDLTFV-----  
-----HLGNP--DLI-----D---RKINFS-K-----  
-----  
>Rapgef1\_[Sinocyclocheilus\_grahami]\_1020480960  
---EIADQLTLLDAELFYKIE---IPEVLL-----WA-KEQ-----N--EE-KSP--  
-----NLTQFTEHFNNMSYWVRSIIQQEKPQDREKLLLKFIKIM-  
KHLRK-LNNFNLSYLAISALDSAPIRRLEWQKQTS-----EGLEEYCTLIDSSSSFRAYR  
AALAD--VEP-----PCIPY-LGLILQDLTFV-----  
-----HLGNP--DLI-----D---GKINFS-K-----  
-----  
>Rapgef1\_[Sinocyclocheilus\_rhinocerosus]\_1025363012  
---EIADQLTLLDAELFYKIE---IPEVLL-----WA-KEQ-----N--EE-KSP--

-----NLTQFTEHFNNMSYWVRSIIIQQEKAQDREKLLLKFIKIM-  
KHLRK-LNNFNSYLAISALDSAPIRRLEWQKQTS-----EGLEEYCTLIDSSSSFRAYR  
AALAE--VEP-----PCIPY-LGLILQDLTFV-----  
-----HLGNP--DFI-----D---GKVNFS-K-----  
-----

>Rapgef1\_[Sorex\_araneus]\_505839952

-SHEIAEQLTLLDAELFYKIE---IPEVLL-----WA-KEQ-----N--EE-KSP--  
-----NLTQFTEHFNNMSYWVRSIIMLQEKAQDRERLLLKFIKIM-  
KHLRK-LNNFNSYLAISALDSAPIRRLEWQKQTS-----EGLAEYCTLIDSSSSFRAYR  
AALSE--VEP-----PCIPY-LGLILQDLTFV-----  
-----HLGNP--DYI-----D---GKVNFS-KRWQQFNIL---DSMRCFQQAHAH-----  
-----YDIRRNDVISFFNDFSDHLAEEALWELSLK---IKPR

>Rapgef1\_[Tauraco\_erythrophus]\_678150753

---EIAEQLTLLDAELFYKIE---IPEVLL-----WA-KEQ-----N--EE-KSP--  
-----NLTQFTEHFNNMSYWVRSIIMLQEKAQDRERLLLKFIKIM-  
KHLRK-LNNFNSYLAISALDSAPIRRLEWQKQTS-----EGLAEYCTLIDSSSSFRAYR  
AALAD--VEP-----PCIPY-LGLILQDLTFV-----  
-----HLGNP--DYI-----E---SKVNFS-K-----  
-----

>Rapgef1\_[Tinamus\_guttatus]\_719760629

---EIAEQLTLLDAELFYKIE---IPEVLL-----WA-KEQ-----N--EE-KSP--  
-----NLTQFTEHFNNMSYWVRSIIMVQEKAQDRERLLLKFIKIM-  
KHLRK-LNNFNSYLAISALDSAPIRRLEWQKQTS-----EGLAEYCTLIDSSSSFRAYR  
AALAD--VDP-----PCIPY-LGLILQDLTFV-----  
-----HLGNP--DYI-----D---SKVNFS-K-----  
-----

>Rapgef1\_[Toxocara\_canis]\_734558230

SSVDIAQQLSIFHTQLFEATDEI---ELI-----TQVFG-RDQF--PGR-----IPS--  
-----NLDLLMRRFNEVQFWTTTEVLLAHGPSKRVTMLKKFIKIA-  
SHAKE-NRDLMISLFAIILGLSNVAVSRITHIWDKLPSKMRRQYAEFEALLDPSRNHRAYR  
MLVAK--MSS-----PTVPF-VPLLLKDLTFT-----  
-----HEGNK--TYF-----A---GLVNFE-KMHMIANVL---RSFKQCKS-KYPVTS  
FDHK--K-----VFESKNLIRN-FKVIDNQRRLEISFQ---IEP-

>Rapgef1\_[Tyto\_alba]\_701396907

-SHEIAEQLTLLDAELFYKIE---IPEVLL-----WA-KEQ-----N--EE-KSP--  
-----NLTQFTEHFNNMSYWVRSIIMLQEKAQDRERLLLKFIKIM-  
KHLRK-LNNFNSYLAISALDSAPIRRLEWQKQTS-----EGLAEYCTLIDSSSSFRAYR  
AALAD--VEP-----PCIPY-LGLILQDLTFV-----  
-----HLGNP--DYI-----D---NKVNFS-K-----  
-----

>Rapgef1\_[Vicugna\_pacos]\_970743100

-SHEIAEQLTLLDAELFYKIE---IPEVLL-----WA-KEQ-----N--EE-KSP--  
-----NLTQFTEHFNNMSYWVRSIIMLQEKAQDRERLLLKFIKIM-  
KHLRK-LNNFNSYLAISALDSAPIRRLEWQKQTS-----EGLAEYCTLIDSSSSFRAYR  
AALSE--VEP-----PCIPY-LGLILQDLTFV-----  
-----HLGNP--DYI-----D---GKVNFS-KRWQQFNIL---DSMRCFQQAHAH-----  
-----YDIRRNDIINFNDFSDHLAEEALWELSLK---IKPR

>Rapgef1\_[Zonotrichia\_albicollis]\_542177208

-SHEIAEQLTLLDAELFYKIE---IPEVLL-----WA-KEQ-----N--EE-KSP--  
-----NLTQFTEHFNNMSYWVRSIIMLQEKAQDRERLLLKFIKIM-  
KHLRK-LNNFNSYLAISALDSAPIRRLEWQKQTS-----EGLAEYCTLIDSSSSFRAYR  
AALAD--VEP-----PCIPY-LGLILQDLTFV-----  
-----HLGNP--DYI-----D---SKVNFS-K-----  
-----

>Rapgef2\_[Acinonyx\_jubatus]\_961717932  
STVEVATQLSMRNFELFRNIEPT----EYI-----DDLFE-L-KS----K-TSC-A----  
-----NLKKFEEVINQETFWVASEILRETNQLKRMKIIKHFIKIA-  
LHCRE-CKNFNSMFAIISGLNLAPVARLRTTWEKLPNKYEKLFQDLQDLFDPSRNMAKYR  
NVLNSQNLQP-----PIIPL-FPVIKKDLTFL-----  
-----HEGND--SKV-----D---GLVNFE-KLRMIAKEI---RHVGRMASVNMDP--  
-----  
>Rapgef2\_[Acromyrmex\_echinatior]\_746838618  
---EVAIQLTLQDFSIFRQIEST----EYV-----DDLFE-L-KS----R-YGV-PM---  
-----LSQFAELVNREMFVVTEVCSEHNLVRRSKIIKQFIKIA-  
RQCKE-CKNFNSMFAIVSGLGHGSVSRRLRASWEKLPKYQRLFSDLQELMDPSRNMSKYR  
QLVASEQTQP-----PIIPF-YPVVKKDLTFI-----  
-----HLGND--SRV-----E---SLVNFE-KLRMIAKEV---RTLTMCSPPYD---  
-----  
>Rapgef2\_[Acropora\_digitifera]\_1005422629  
-----  
-----FWVITEICSESNLVKRMKIMKTFIKIA-  
RLCKE-CKNYNTLFAIVSGLGHSAVQRLKNTWDKLPTRHSAFEDLQGLMDPSRNMSKYR  
NLLNGEHGEP-----PLIPF-FPVITKDLTFI-----  
-----HLGND--SII-----D---GLVNFE-KLRMIAKEI---RQISKFNIPYDP--  
-----  
>Rapgef2\_[Ailuropoda\_melanoleuca]\_752411684  
STVEVATQLSMRNFELFRNIEPT----EYI-----DDLFE-L-KS----K-TSC-A----  
-----NLKKFEEVINQETFWVASEILRETNQLKRMKIIKHFIKIA-  
LHCRE-CKNFNSMFAIISGLNLAPVARLRTTWEKLPNKYEKLFQDLQDLFDPSRNMAKYR  
NVLNSQNLQP-----PIIPL-FPVIKKDLTFL-----  
-----HEGND--SKV-----D---GLVNFE-KLRMIAKEI---RHVGRMASVNMDP--  
-----  
>Rapgef2\_[Alligator\_mississippiensis]\_1011564443  
STIEVATQLSMRDFELFRNIEPT----EYI-----DDLFE-L-DS----K-TGN-A----  
-----HLKQFEDVINQETFWVATEILLEPNQLKRMKIIKHFIKIA-  
LHCRE-CKNFNSMFAVISGLNLASVARLRGTWEKLPKYEKHFRLQDLFDPSRNMAKYR  
NILSSQSMQP-----PIIPL-FPVVKKDITFL-----  
-----HEGND--SKV-----D---GLVNFE-KLRMIAKEI---RQVIRMTSANMDP--  
-----  
>Rapgef2\_[Alligator\_sinensis]\_557280478  
STVEVATQLSMRNFELFRNIEPT----EYI-----DDLFE-L-KS----K-SGC-T----  
-----NLKKFEEVINQETFWVASEILRETNQLKRMKIIKHFIKIA-  
LHCRE-CKNFNSMFAIISGLNLAPVARLRTTWEKLPKYEKLFQDLQDLFDPSRNMAKYR  
NVLNSQNLQP-----PIIPL-FPVIKKDLTFL-----  
-----HEGND--SKV-----E---GLVNFE-KLRMIAKEI---RHVGRMASVNMDP--  
-----  
>Rapgef2\_[Amyeloides\_transitella]\_913296464  
---EVAVQLTLQDFCIFRQIEST----EYV-----DDLFE-L-KS----R-YGT-PM---  
-----LSQFAELVNKEMFWVVTEVVNEQNIVRRSKIIKQFIKVA-  
RHCKE-CKNFNSMFAIISGLGHGAVSRLRMTWDKLPKYKLFQDLQMLMDPSRNMSKYR  
QLVTTEQGRS-----PVIPIF-YPVVKKDLTFI-----  
-----HLGND--TKV-----E---GMVNFE-KLRMIAKEV---RTLTMCSPPYD---  
-----  
>Rapgef2\_[Anser\_cygnoides\_domesticus]\_902881430  
STVEVATQLSMRNFELFRNIEPT----EYI-----DDLFE-L-KS----K-TGC-T----  
-----NLKKFEEVINQETFWVASEILRETNQLKRMKIIKHFIKIA-  
LHCRE-CKNFNSMFAIISGLNLAPVARLRTTWEKLPKYEKLFQDLQDLFDPSRNMAKYR  
NVLNSQNLQP-----PIIPL-FPVIKKDLTFL-----

-----HEGND--SKV-----E---GLVNFE-KLRMIAKEI---RHVGRMASVNMDP---  
-----  
>Rapgef2\_[Apis\_cerana]\_1035602531  
---EVAIQTLTLQDFSIFRQIEST----EYV-----DDLFE-L-KS----R-YGV-PM---  
-----LRQFAELVNREMFVVTEVCSEHNLVRRSKI IKQFIKIA-  
RQCKE-CKNFNSMFAIVSGLGHGAVSRLRASWEKLPSKYQRLFSDLQELMDPSRNMSKYR  
QLVASEQTQP-----PIIPF-YPVVKKDLTFI-----  
-----HLGND--SRV-----E---GLVNFE-KLRMIAKEV---RTLTMCSPPYD---  
-----  
>Rapgef2\_[Apis\_florea]\_820851409  
---EVAIQTLTLQDFSIFRQIEST----EYV-----DDLFE-L-KS----R-YGV-PM---  
-----LRQFAELVNREMFVVTEVCSEHNLVRRSKI IKQFIKIA-  
RQCKE-CKNFNSMFAIVSGLGHGAVSRLRASWEKLPSKYQRLFSDLQELMDPSRNMSKYR  
QLVASEQTQP-----PIIPF-YPVVKKDLTFI-----  
-----HLGND--SRV-----E---GLVNFE-KLRMIAKEV---RTLTMCSPPYD---  
-----  
>Rapgef2\_[Apis\_mellifera]\_1032018809  
---EVAIQTLTLQDFSIFRQIEST----EYV-----DDLFE-L-KS----R-YGV-PM---  
-----LRQFAELVNREMFVVTEVCSEHNLVRRSKI IKQFIKIA-  
RQCKE-CKNFNSMFAIVSGLGHGAVSRLRASWEKLPSKYQRLFSDLQELMDPSRNMSKYR  
QLVASEQTQP-----PIIPF-YPVVKKDLTFI-----  
-----HLGND--SRV-----E---GLVNFE-KLRMIAKEV---RTLTMCSPPYD---  
-----  
>Rapgef2\_[Aplysia\_californica]\_871253417  
TAHEVAWQLTLNDYRVFREIEPT----EYV-----DDLYN-L-QS----K-FGC-A----  
-----QLHKFAELVNKEMFWVTEICSEANLVKRTKLLKHFIKIA-  
MHCKD-SKNFNSMFAISGLGHGSISRLKLTWERLPSKYSKLFQDLQSFMDPSRNMAKYR  
NLINS--VQA-----PFIPF-FPIFKDLTFI-----  
-----HLGND--SHV-----D---GLVNFE-KLRMIAKEV---RNI-----  
-----  
>Rapgef2\_[Apteryx\_australis\_mantelli]\_926516120  
STVEVATQLSMRNFELFRNIEPT----EYI-----DDLFK-L-KS----K-TGC-T----  
-----NLKKFEEVINQETFWVASEILRETNQLKRMKI IKHFIKIA-  
LHCRE-CKNFNSMFAIISGLNLAPVARLRTTWEKLPSKYEKLFQDLQDLFDPSRNMAKYR  
NVLNSQSLQP-----PIIPL-FPVIKKDLTFL-----  
-----HEGND--SKV-----E---GLVNFE-KLRMIAKEI---RHVGRMASVNMDP---  
-----  
>Rapgef2\_[Aquila\_chrysaetos\_canadensis]\_768351322  
STVEVATQLSMRNFELFRNIEPT----EYI-----DDLFK-L-KS----K-TGC-T----  
-----NLKKFEEVINQETFWVASEILRETNQLKRMKI IKHFIKIA-  
LHCRE-CKNFNSMFAIISGLNLAPVARLRTTWEKLPSKYEKLFQDLQDLFDPSRNMAKYR  
NVLNSQNLQP-----PIIPL-FPVIKKDLTFL-----  
-----HEGND--SKV-----E---GLVNFE-KLRMIAKEI---RHVGRMASVNMDP---  
-----  
>Rapgef2\_[Ascaris\_suum]\_541048950  
----VAAQLTLQDFAVFSSIEPT----EYV-----DNLFN-L-ES----R-YGW-P----  
-----KLSEFEALFNKEMWWVPSEVCRERSIQKRAKLKVKFIKVA-  
RHCRD-FHNFNSMFAIMSGLDKPAVRRLLHTWERVPNKYVKMFEDLQQVLDPDSRNMSKYR  
QHLSEVSNEP-----PVVPM-YPVLKKDLTFS-----  
-----HEGNP--TYC-----G---KLVNFE-KLRMIARAI---RSVTKLCSVPY----  
-----  
>Rapgef2\_[Athalia\_rosae]\_817056263  
---EVAIQTLTLQDFSIFRQIEST----EYV-----DDLFK-L-KS----R-YGV-PM---  
-----LSHFAELVNREMFVVTEVCSEHNLVRRSKI IKQFLKIA-

RQCKE-CKNFNSMFAIVSGLGHGAVCRLRGSWEKLPSKYQRLFTDLEKLMDFSRNMCQYR  
 QLVASEQTQP-----PVIPF-YPVVRKDLTFI-----  
 -----HLGND--SRV-----E---GLVNFE-KLRMIAKEV---RTLTKMCSSPYD---  
 -----

>Rapgef2\_[Atta\_colombica]\_1009357161  
 ---EVAIQLTLQDFSIFRQIEST----EYV-----DDLFE-L-KS----R-YGV-PM---  
 -----LSQFAELVNREMFVVTEVCSEHNLVRRS-----  
 -QCKE-CKNFNSMFAIVSGLGHGVSRLRASWEKLPTKYQRLFSDLQELMDPSRNMSKYR  
 QLVASEQTQP-----PIIPF-YPVVKDLTFI-----  
 -----HLGND--SRV-----E---GLVNFE-KLRMIAKEV---RTLTMCSPPYD---  
 -----

>Rapgef2\_[Bactrocera\_cucurbitae]\_751445210  
 ---ELAIQLTLQDFAIFRQIEST----EYI-----DDLFN-L-KT----K-YGV-PM---  
 -----LTKFAELVNREMFVVTEICSEHNIVRRMKIVKQFIKIA-  
 RHCKE-CRNFNSMFAIISGLGHAASRLRLTWEKLPSKYQRVFSDLQDLMDPSRNMSKYR  
 QLVSELEFNQH-----PIIPF-YPIVKKDLTFI-----  
 -----HLGND--TRI-----E---GLINFE-KLRMLAKEV---RLLTHMCSSPYD---  
 -----

>Rapgef2\_[Bactrocera\_oleae]\_929380230  
 ---ELAIQLTLQDFAIFRQIEST----EYI-----DDLFN-L-KT----K-YGV-PM---  
 -----LTKFAELVNREMFVVTEICGEHNIVRRMKIVKQFIKIA-  
 RHCKE-CRNFNSMFAIISGLGHAASRLRLTWEKLPSKYQRLFSDLQDLMDPSRNMSKYR  
 QLVSELLEAQH-----PIIPF-YPIVKKDLTFI-----  
 -----HLGND--TRI-----E---GLINFE-KLRMLAKEV---RLLTHMCSSPYD---  
 -----

>Rapgef2\_[Balaenoptera\_acutorostrata\_scammoni]\_594672686  
 STVEAATQLSMRNFELFRNVEPT----EYI-----DDLFK-L-RS----K-TSC-A----  
 -----NLKKFEEVINQETFWVASEILRETNQLKRMKIIKHFIKIA-  
 LHCRE-CKNFNSMFAIISGLNLAPVARLRTTWEKLPNKYKELFQDLQDLDFDPSRNMAKYR  
 NVLNSQNLQP-----PIIPL-FPVIKKDLTFL-----  
 -----HEGND--SKV-----D---GLVNFE-KLRMIAKEI---RHVGRMASVNMDP---  
 -----

>Rapgef2\_[Balearica\_regulorum\_gibbericeps]\_723572377  
 STVEVATQLSMRNFELFRNIEPT----EYI-----DDLFK-L-KS----K-TGC-T----  
 -----NLKKFEEVINQETFWVASEILRETNQLKRMKIIKHFIKIA-  
 LHCRE-CKNFNSMFAIISGLNLAPVARLRTTWEKLPSKYKELFQDLQDLDFDPSRNMAKYR  
 NVLNSQNLQP-----PIIPL-FPVIKKDLTFL-----  
 -----HEGND--SKV-----E---GLVNFE-KLRMIAKEI---RHVGRMASVNMDP---  
 -----

>Rapgef2\_[Bombus\_impatiens]\_815915167  
 ---EVAIQLTLQDFSIFRQIEST----EYV-----DDLFE-L-KS----R-YGV-PM---  
 -----LRQFAELVNREMFVVTEVCSEHNLVRRSKIIKQFIKIA-  
 RQCKE-CKNFNSMFAIVSGLGHGAVSRLRASWEKLPSKYQRLFSDLQELMDPSRNMSKYR  
 QLVASEQTQP-----PIIPF-YPVVKDLTFI-----  
 -----HLGND--SRV-----E---GLVNFE-KLRMIAKEV---RTLTMCSPPYD---  
 -----

>Rapgef2\_[Bombus\_terrestris]\_808120538  
 ---EVAIQLTLQDFSIFRQIEST----EYV-----DDLFE-L-KS----R-YGV-PM---  
 -----LRQFAELVNREMFVVTEVCSEHNLVRRSKIIKQFIKIA-  
 RQCKE-CKNFNSMFAIVSGLGHGAVSRLRASWEKLPSKYQRLFSDLQELMDPSRNMSKYR  
 QLVASEQTQP-----PIIPF-YPVVKDLTFI-----  
 -----HLGND--SRV-----E---GLVNFE-KLRMIAKEV---RTLTMCSPPYD---  
 -----

>Rapgef2\_[Bombyx\_mori]\_512898941



```

---EVAVQLTLQDFCIFRQIEST----EYV-----DDLFE-L-KS----R-YGT-PM---
-----LSQFAELVNKEMFWVVEVVNEQNLVRRSKI IKQFIKVA-
RHCKE-CKNFNSMFAIISGLGHGAVSRLRMTWEKLP TKYYKLFTDLQMLMDPSRNMSKYR
QLVTSEQGRS-----PVI PF-YPVVKKDLTFI-----
-----HLGND--TKV-----E---GMVNFE-KLRMIAKEV---RTL TNMCSSPYD---
-----
>Rapgef2_[Bos_mutus]_440905105
STVEVATQLSMRNFELFRNIEPT----EYI-----DDLFK-L-KS----K-TSC-A----
-----NLKTFEEVINQETFWVASEILRETNQLKRMKIIKHFIKIA-
LHCRE-CKNFNSMFAIISGLNLAPVARLRTTWEKLPNKYEKLFQDLQDLFDPSRNMAKYR
NVLNSQNLQP-----PIIPL-FPVIKKDLTFL-----
-----HEGND--SKV-----D---GLVNFE-KLRMIAKEI---RHVGRMASVNMDP---
-----
>Rapgef2_[Bos_taurus]_982949939
STVEVATQLSMRNFELFRNIEPT----EYI-----DDLFK-L-KS----K-TSC-A----
-----NLKTFEEVINQETFWVASEILRETNQLKRMKIIKHFIKIA-
LHCRE-CKNFNSMFAIISGLNLAPVARLRTTWEKLPNKYEKLFQDLQDLFDPSRNMAKYR
NVLNSQNLQP-----PIIPL-FPVIKKDLTFL-----
-----HEGND--SKV-----D---GLVNFE-KLRMIAKEI---RHVGRMASVNMDP---
-----
>Rapgef2_[Bubalus_bubalis]_594101758
STVEVATQLSMRNFELFRNIEPT----EYI-----DDLFK-L-KS----K-TSC-A----
-----NLKTFEEVINQETFWVASEILRETNQLKRMKIIKHFIKIA-
LHCRE-CKNFNSMFAIISGLNLAPVARLRTTWEKLPNKYEKLFQDLQDLFDPSRNMAKYR
NVLNSQNLQP-----PIIPL-FPVIKKDLTFL-----
-----HEGND--SKV-----D---GLVNFE-KLRMIAKEI---RHVGRMASVNMDP---
-----
>Rapgef2_[Buceros_rhinoceros_silvestris]_704156104
STVEVATQLSMRNFELFRNIEPT----EYI-----DDLFK-L-KS----K-SGC-T----
-----NLKKFEEVINQETFWVASEILRETNQLKRMKIIKHFIKIA-
LHCRE-CKNFNSMFAIISGLNLAPVARLRTTWEKLP SKYEKLFQDLQDLFDPSRNMAKYR
NVLNSQNLQP-----PIIPL-FPVIKKDLTFL-----
-----HEGND--SKV-----E---GLVNFE-KLRMIAKEI---RHVGRMASVNMDP---
-----
>Rapgef2_[Calypste_anna]_663260986
STVEVATQLSMRNFELFRNIEPT----EYI-----DDLFK-L-KS----K-TGC-T----
-----NLKKFEEVINQETFWVASEILRETNQLKRMKIIKHFIKIA-
LHCRE-CKNFNSMFAIISGLNLAPVARLRTTWEKLP SKYEKLFQDLQDLFDPSRNMAKYR
NVLNSQNLQP-----PIIPL-FPVIKKDLTFL-----
-----HEGND--SKV-----E---GLVNFE-KLRMIAKEI---RHVGRMASVNMDP---
-----
>Rapgef2_[Capra_hircus]_926712293
STVEVATQLSMRNFELFRNIEPT----EYI-----DDLFK-L-KS----K-TSC-A----
-----NLKTFEEVINQETFWVASEILRETNQLKRMKIIKHFIKIA-
LHCRE-CKNFNSMFAIISGLNLAPVARLRTTWEKLPNKYEKLFQDLQDLFDPSRNMAKYR
NVLNSQNLQP-----PIIPL-FPVIKKDLTFL-----
-----HEGND--SKV-----D---GLVNFE-KLRMIAKEI---RHVGRMASVNMDP---
-----
>Rapgef2_[Caprimulgus_carolinensis]_704313429
STVEVATQLSMRNFELFRNIEPT----EYI-----DDLFK-L-KS----K-TGC-T----
-----NLKKFEEVINQETFWVASEILRETNQLKRMKIIKHFIKIA-
LHCRE-CKNFNSMFAIISGLNLAPVARLRTTWEKLP SKYEKLFQDLQDLFDPSRNMAKYR
NVLNSQNLQP-----PIIPL-FPVIKKDLTFL-----
-----HEGND--SKV-----E---GLVNFE-KLRMIAKEI---RHVGRMASVNMDP---

```

```

-----
>Rapgef2_[Cariama_cristata]_698402657
STVEVATQLSMRNFELFRNIEPT----EYI-----DDLFFK-L-KS----K-TGC-T----
-----NLKKFEEVINQETFWVASEILRETNQLKRMKIIKHFIKIA-
LHCRE-CKNFNSMFAIISGLNLAPVARLRTTWEKLP SKYEKLFQDLQDLFDPSRNMAKYR
NVLNSQNLQP-----PIIPL-FPVIKKDLTFL-----
-----HEGND--SKV-----E---GLVNFE-KLRMIAKEI---RHVGRMASVNMDP--
-----

>Rapgef2_[Carlito_syrichtha]_640783230
STVEVATQLSMRNFELFRNIEPT----EYI-----DDLFFK-L-KS----K-TNC-A----
-----NLKKFEEVINQETFWVASEILRETNQLKRMKIIKHFIKIA-
LHCRE-CKNFNSMFAIISGLNLAPVARLRTTWEKLP NKYEKLFQDLQDLFDPSRNMAKYR
NVLNSQNLQP-----PIIPL-FPVIKKDLTFL-----
-----HEGND--SKV-----D---GLVNFE-KLRMIAKEI---RHVGRMASVNMDP--
-----

>Rapgef2_[Cavia_porcellus]_884936739
SPTEVSKQLSMRNFELFRNIEPT----EYI-----DDLFFK-L-RS----K-TSC-A----
-----NLKMFEEVINQETFWVASEILRETNQLKRMKIIKHFIKIA-
LHCRE-CKNFNSMFTIISGLNLAPVARLRTTWEKLP NKYEKLFQDLQDLFDPSRNMAKYR
NVLNSQNLQP-----PIIPL-FPIIKKDLTFL-----
-----HEGND--SKV-----D---GLVNFE-KLRMIA-----
-----

>Rapgef2_[Cerapachys_biroi]_759046373
---EVAIQLTLQDFSIFRQIEST----EYV-----DDLFE-L-KS----R-YGV-PM---
-----LSQFAELVNREMFVVTEVCSEHNLVRRSKI IKQFIKIA-
RQCKE-CKNFNSMFAIVSGLGHGAVSRLRASWEKLP TKYQRLFSDLQELMDPSRNMSKYR
QLVASEQTQP-----PIIPF-YPVVKKDLTFI-----
-----HLGND--SRV-----E---GLVNFE-KLRMIAKEV---RTL TNMCSSPYD---
-----

>Rapgef2_[Ceratosolen_solmsi_marchali]_766935029
---EVAIQLTLQDFSIFRQIEST----EYV-----DDLFE-L-KS----K-YGV-PM---
-----LSQFAELVNREMFVVTEVCSEHNLVRRSKI IKQFIKIA-
RQCKE-CKNFNSMFAIVSGLGHGAVSRLRASWEKLP SKYQRLFSDLQELMDPSRNMSKYR
QLVASEQTQP-----PIIPF-YPVVKKDLTFI-----
-----HLGND--SRV-----E---GLVNFE-KLRMIAKEV---RTL-----
-----

>Rapgef2_[Ceratotherium_simum_simum]_955490007
STVEVATQLSMRNFELFRNIEPT----EYI-----DDLFFK-L-KS----K-TSC-V----
-----NLKKFEEVINQETFWVASEILRETNQLKRMKIIKHFIKIA-
LHCRE-CKNFNSMFAIISGLNLAPVARLRTTWEKLP NKYEKLFQDLQDLFDPSRNMAKYR
NVLNSQNLQP-----PIIPL-FPVIKKDLTFL-----
-----HEGND--SKV-----D---GLVNFE-KLRMIAKEI---RHVGRMASVNMDP--
-----

>Rapgef2_[Chelonia_mydas]_591353971
STVEMAAQLSMRNFELFRNIEPT----EYI-----DDLFFK-L-KS----K-ISC-T----
-----NLKKFEEVINQETFWVASEILRETNQLKRMKIIKHFIKIA-
LHCRE-CKNFNSMFAIISGLNLAPVARLRTTWEKLP SKYEKLFQDLQDLFDPSRNMAKYR
NVLNSQNLQP-----PIIPL-FPVIKKDLTFL-----
-----HEGND--SKV-----E---GLVNFE-KLRMIAKEI---RHVGRMASVNMDP--
-----

>Rapgef2_[Chlamydotis_macqueenii]_705683189
STVEVATQLSMRNFELFRNIEPT----EYI-----DDLFFK-L-KS----K-TGC-T----
-----NLKKFEEVINQETFWVASEILRETNQLKRMKIIKHFIKIA-
LHCRE-CKNFNSMFAIISGLNLAPVARLRTTWEKLP SKYEKLFQDLQDLFDPSRNMAKYR

```

```

NVLNSQNLQP-----PIIPL-FPVIKKDLTFL-----
-----HEGND--SKV-----E---GLVNFE-KLRMIAKEI---RHVGRMASVNMDP--
-----
>Rapgef2_[Chlorocebus_sabaeus]_635045487
STVEVATQLSMRNFELFRNIEPT----EYI-----DDLFK-L-RS----K-TSC-A----
-----NLKRFEVINQETFWVASEILRETNQLKRMKIIKHFIKIA-
LHCRE-CKNFNSMFAIISGLNLAPVARLRTTWEKLPNKYEKLFQDLQDLFDPSRNMAKYR
NVLNSQNLQP-----PIIPL-FPVIKKDLTFL-----
-----HEGND--SKV-----D---GLVNFE-KLRMIAKEI---RHVGRMASVNMDP--
-----
>Rapgef2_[Ciona_intestinalis]_699243364
---EVAVFLTRKDYKMFQATAST----DFI-----EDLFH-L-DA-----E-----LT--
-----QKAFEDLVNRELFWVVTTLCPNEPNLIQRSKIIKHFKVIA-
HHCKI-LKNLNSTFALISGLGYRAVSRMKQTWEKVPKSNRLEELQALMDPSRNMSKYR
TLLNEMVSQLP-----PVIPI-IPVIKKDLTFL-----
-----DLGND--TKV-----E---GLINFE-KMRMIGKEV---RNV-----
-----
>Rapgef2_[Clonorchis_sinensis]_358336436
TPEDLAIRVTLDDEYEVFRAVQST----EYI-----DEVFG-LSPALNCLSLSDA-AV---
SHPTPT-----GYATGHGNLDRFTELVNREAYWAPTEICMESNLNRRVDLIKRFIKLA-
KLCRD-LRNFTNMFCILVGLHQTPVERLKQTWERLPNKYFKMYRDLMSVLDTSRNFFQYR
SMLTGTEAAA-----PMLPY-LPLVLKDLTFI-----
-----HLGNP--SRS-----SD--GLINFE-KLRMLAKEI---RAICRMCNVEYDIDA
AH-----
>Rapgef2_[Colius_striatus]_706134628
STVEVATQLSMRNFELFRNIEPT----EYI-----DDLFK-L-KS----K-TGC-T----
-----NLKKFEEVINQETFWVASEILRETNQLKRMKIIKHFIKIA-
LHCRE-CKNFNSMFAIISGLNLAPVARLRTTWEKLPNPKYEKLFQDLQDLFDPSRNMAKYR
NVLNSQNLQP-----PIIPL-FPVIKKDLTFL-----
-----HEGND--SKV-----E---GLVNFE-KLRMIAKEI---RHVGRMASVNMDP--
-----
>Rapgef2_[Colobus_angolensis_palliatus]_795294397
STVEVATQLSMRNFELFRNIEPT----EYI-----DDLFK-L-RS----K-TSC-A----
-----NLKRFEVINQETFWVASEILRETNQLKRMKIIKHFIKIA-
LHCRE-CKNFNSMFAIISGLNLAPVARLRTTWEKLPNKYEKLFQDLQDLFDPSRNMAKYR
NVLNSQNLQP-----PIIPL-FPVIKKDLTFL-----
-----HEGND--SKV-----D---GLVNFE-KLRMIAKEI---RHVGRMASVNMDP--
-----
>Rapgef2_[Corvus_cornix_cornix]_727064554
STVEVATQLSMRNFELFRNIEPT----EYI-----DDLFK-L-KS----K-TGC-T----
-----NLKRFEVINQETFWVASEILRETNQLKRMKIIKHFIKIA-
LHCRE-CKNFNSMFAIISGLNLAPVARLRTTWEKLPNPKYEKLFQDLQDLFDPSRNMAKYR
NVLNSQNLQP-----PIIPL-FPVIKKDLTFL-----
-----HEGND--SKV-----E---GLVNFE-KLRMIAKEI---RHVGRMASVNMDP--
-----
>Rapgef2_[Crassostrea_gigas]_762094094
---EVASQLTLDDFKVFASIQTPT----EYI-----DKLFN-I-KS----K-YGI-P----
-----NLEKFVELVNKEMYWVITEVCSEPNVVKRMRIIKQFIKIA-
KHCKD-CKNFNSMFSILSGLDKVYVSRLRNTWEKLSKKDLKTYDDLKELIDPSKNMSKYR
SYVGSEHVQP-----PMLPL-FPVAMKDLTFL-----
-----KDGND--TKV-----D---GLINFE-KFRMIAKEI---R-----
-----
>Rapgef2_[Cricetulus_griseus]_1032926035
STVEVATQLSMRNFELFRNIEPT----EYI-----DDLFK-L-KS----K-TSC-A----

```

-----NLKKFEEVINQETFWVASEILRETNQLKRMKIIKHFIKIA-  
LHCRE-CKNFNSMFAIISGLNLAPVARLRTTWEKLPNKYEKLFQDLQDLFDPSRNMAKYR  
NVLSGQNLQP-----PVIP-----  
-----

>Rapgef2\_[Culex quinquefasciatus]\_170039216  
NANELAIQLTLQDFSIFRQIEST----EYI-----DDLFN-L-KS----R-YGK-PM---  
-----LVKFAELVNREMFVVTEVCSEHNMMRRCKIIKQFIKIA-  
RHCKE-CKNFNSLFAIVSGLGHAASRLRQTWEKLP SKYQKLFNDLQELMDPSRNMSKYR  
QLIQTELNAQH-----PVIPIF-YPVVKKDLTFI-----  
-----HLGND--SKI-----E---SLINFE-KLRMISKEV---RTLLQMCNS-----  
-----

>Rapgef2\_[Cynoglossus semilaevis]\_1035251282  
STVEVATQLSMRAFELFCAIEPT----EYI-----DDLFK-L-RS----K-TGS-A----  
-----SLKRFEAAINHETFWVATEVTREP NQLKRMKT VKHFIKIA-  
LHCRE-CKNFSSMFAIISGLNLAPVSR LRGTWEKLP SKYEKLF GDLQDLFDPSRNMAKYR  
NVLNNQNLQP-----PIIPL-FPVIKKDLTFL-----  
-----HEGND--SKV-----D---GLVNFE-KLRMIAKEI---RHVGRMASVNMDP---  
-----

>Rapgef2\_[Cyphomyrmex costatus]\_1009369324  
---EVAIQLTLQDFSIFRQIEST----EYV-----DDLFE-L-KS----R-YGV-PM---  
-----LSQFAELVNREMFVVTEVCSEHNLVRRSKIIKQFIKIA-  
RQCKE-CKNFNSMFAIVSGLGHGSVSR LRASWEKLP TKYQRLFSDLQELMDPSRNMSKYR  
QLVASEQTQP-----PIIPIF-YPVVKKDLTFI-----  
-----HLGND--SRV-----E---GLVNFE-KLRMIAKEV---RTL TNMCSSPYD---  
-----

>Rapgef2\_[Danio rerio]\_1040663345  
STVEVATQLSMRAFELFCAIEPT----EYI-----DDLFK-L-KT----RLTGP-P----  
-----SLKLFEAAINRETFWVATEV VREANQLKRMKIVKHFIKIA-  
LHCRE-CKNFNSMFAIISGLNLAPVSR LRGTWEKLP SKYEKLFSDLQDLFDPSRNMAKYR  
NLLNSQNLQP-----PIIPL-FPVIKKDLTFL-----  
-----HEGND--SKV-----D---GLVNFE-KLRMIAKEI---RHV-----  
-----

>Rapgef2\_[Diachasma alloeum]\_970900035  
---EVAIQLTLQDFSIFRQIEST----EYV-----DDLFE-L-KS----R-YGV-PM---  
-----LSQFAELVNREMFVVTEVCSEYNLVKRSKIIKQFIKIA-  
RQCKE-CKNFNSMFAIVSGLGHGAVSR LRASWEKLP SKYQRLFSDLQELMDPSRNMSKYR  
QLVASEQTQP-----PIIPIF-YPVVKKDLTFI-----  
-----HLGND--SRV-----E---GLVNFE-KLRMIAKEV---RTL TNMCSSPYD---  
-----

>Rapgef2\_[Diaphorina citri]\_662216327  
---EVATQLTLQDYAIFRQIEAT----EYV-----DDLFE-L-KS----G-YGV-PM---  
-----LSQFAELVNREMFVVTEVCSESNLVRRSKVIKQFIKVA-  
RQCKE-CRNFSMFAIVSGLGHGAVSR LRSSWEKLP SKYQRLFIRIKS-----  
-----IPF-YPVVKKDLTFI-----  
-----HLGND--SKV-----E---GLINFE-KLRMIAKEV---RTL TNMCSAPYD---  
-----

>Rapgef2\_[Dinoponera quadriceps]\_951557922  
---EVAIQLTLQDFSIFRQIEST----EYV-----DDLFE-L-KS----R-YGV-PM---  
-----LSQFAELVNREMFVVTEVCSEHNLVRRSKIIKQFIKIA-  
RQCKE-CKNFNSMFAIVSGLGHGAVSR LRASWEKLP TKYQRLFSDLQELMDPSRNMSKYR  
QLVASEQTQP-----PIIPIF-YPVVKKDLTFI-----  
-----HLGND--SRV-----E---GLVNFE-KLRMIAKEV---RTL TNMCSSPYD---  
-----

```

>Rapgef2_[Diuraphis_noxia]_985398052
---EVAVQLTLQDFSIFRQIEAT---EYV-----DDLQ-L-DS----R-YGT-PM---
-----LSKFAELVNTEMFWVTEICSEHNLIRRSKMIKQFIKVA-
RQCKE-CKNFNSMFAIISGLGHGAVSRLRQSWKLPKYQRLFSDLQDLMDPSRNMSKYR
QLVSNEQSQP-----PIIPF-YPVVKKDLTFI-----
-----HLGND--THV-----E---SLINFE-KLRMIAKEV---RNLTNMCSSPYD---
-----

>Rapgef2_[Drosophila_biarmipes]_1036675528
---ELAIQLTLQDFANFRQIEST---EYV-----DELFE-L-KS----R-YGV-PM---
-----LSKFAELVNREMFWVTEICAEHNIVRRMKIVKQFIKIA-
RHCKE-CRNFNSMFAIVSGLGHGAVSRLRQTWEKLPKYQRLFNDLQDLMDPSRNMSKYR
QLVSAELLAQH-----PIIPF-YPVVKKDLTFI-----
-----HLGND--TTV-----D---GLINFE-KLRMLAKEV---RLLTHMCSSPYD---
-----

>Rapgef2_[Drosophila_suzukii]_1036058972
---ELAIQLTLQDFANFRQIEST---EYV-----DELFE-L-RS----R-YGV-PM---
-----LSKFAELVNREMFWVSEICAEHNIVRRMKIVKQFIKIA-
RHCKE-CRNFNSMFAIISGLGHGAVSRLRQTWEKLPKYQRLFNDLQDLMDPSRNMSKYR
QLVSAELLAQH-----PIIPF-YPVVKKDLTFI-----
-----HLGNN--TTV-----D---GLINFE-KLRMLAKEV---RLLTHMCSSPYD---
-----

>Rapgef2_[Dufourea_novaeangliae]_987912049
---EVAIQLTLQDFSIFRQIEST---EYV-----DDLFE-L-KS----R-YGV-PM---
-----LRQFAELVNREMFWVTEVCSEHNLVRRSKI IKQFIKIA-
RQCKE-CKNFNSMFAIVSGLGHGAVSRLRASWEKLPNKYQRLFSDLQELMDPSRNMSKYR
QLVASEQTQP-----PIIPF-YPVVKKDLTFI-----
-----HLGND--SRV-----E---SLVNFE-KLRMIAKEV---RTLTNMCSSPYD---
-----

>Rapgef2_[Echinococcus_granulosus]_576698151
SPEEVAIQLTLDDFSIFRSIEAA---EFV-----DKVFG-LTPP-ASSALDGC-SNSSN
NENIDNDGGGGGGFATGCGNLDAFADVVNKEAYWVPSELCAETSLPKRVDMLKRFIKIA-
KLCRD-LRNFTNMFICILVGLHMSPPERLRTTWERLPNKYVKMSRDLALVLDPSRNFAHYR
NLLTSPQPQPTGAQCLPLVPY-LPLVLKDLTFI-----
-----HLGNP--SRSPATSASSSACPQLINFA-KLRMFAKEI---RSLR-----
-----

>Rapgef2_[Echinops_telfairi]_507671420
STVEVATQLSMRNFELFRNIEPT---EYI-----DDLFK-L-KS----K-NSC-A---
-----NLKKFEDVINQETFWVASEILRETNQLKRMKIVKHFIKIA-
LHCRE-CKNFNSMFAIISGLNLAPVARLRTTWEKLPNKYEKLFQDLQDLFDPSRNMAKYR
NVLNSQNLQP-----PIIPL-FPVIKKDLTFL-----
-----HEGND--SKV-----D---GLVNFE-KLRMIAKEI---RHVGRMASVNMDP---
-----

>Rapgef2_[Eptesicus_fuscus]_641691941
STVEVATQLSMRNFELFRNIEPT---EYI-----DDLFK-L-KS----K-TSC-A---
-----NLKKFEEVINQETFWVASEILRETNQLKRMKIIKHFIKIA-
LHCRE-CKNFNSMFAIISGLNLAPVARLRTTWEKLPNKYEKLFQDLQDLFDPSRNMAKYR
NVLNSQNLQP-----PIIPL-FPVIKKDLTFL-----
-----HEGND--SKV-----D---GLVNFE-KLRMIAKEI---RHVGRMASVNMDP---
-----

>Rapgef2_[Equus_asinus]_958803745
STVEVATQLSMRNFELFRNIEPT---EYI-----DDLFK-L-KS----K-TSC-V---
-----NLKKFEEVINQETFWVASEILRETNQLKRMKIIKHFIKIA-
LHCRE-CKNFNSMFAIISGLNLAPVARLRTTWEKLPNKYEKLFQDLQDLFDPSRNMAKYR
TVLNSQNLQP-----PIIPL-FPVIKKDLTFL-----

```

```
-----HEGND--SKV-----D---GLVNFE-KLRMIAKEI---RHVGRMASVNMDP--
-----
>Rapgef2_[Equus_caballus]_953847565
STVEVATQLSMRNFELFRNIEPT----EYI-----DDLFK-L-KS----K-TSC-V----
-----NLKKFEEVINQETFWVASEILRETNQLKRMKIIKHFIKIA-
LHCRE-CKNFNSMFAIISGLNLAPVARLRTTWEKLPNKYEKLFQDLQDLFDPSRNMAKYR
TVLNSQNLQP-----PIIPL-FPVIKKDLTFL-----
-----HEGND--SKV-----D---GLVNFE-KLRMIAKEI---RHVGRMASVNMDP--
-----
>Rapgef2_[Esox_lucius]_742092564
STVEVATQLSMRAFELFCAIEPT----EYI-----DDLFK-L-KS----K-TGS-F----
-----CLKRFEEAINQETFWVASEVTREPNQLKRMKTIVKHFIKIA-
LHCRE-CKNFNSMFAIISGLNLAPVSRRLGTWEKLP SKYEKLFQDLQDLFDPSRNMAKYR
NVLNNQNLQP-----PIIPL-FPVIKKDLTFL-----
-----HEGND--SKV-----D---GLVNFE-KLRMIAKEI---RHVGRMASVNMDP--
-----
>Rapgef2_[Falco_cherrug]_541968958
STVEVATQLSMRNFELFRNIEPT----EYI-----DDLFK-L-KS----K-TGC-A----
-----NLKKFEEVINQETFWVASEILRETNQLKRMKIIKHFIKIA-
LHCRE-CKNFNSMFAIISGLNLAPVARLRTTWEKLP SKYEKLFQDLQDLFDPSRNMAKYR
NVLNSQNLQP-----PIIPL-FPVIKKDLTFL-----
-----HEGND--SKV-----E---GLVNFE-KLRMIAKEI---RHVGRMASVNMDP--
-----
>Rapgef2_[Felis_catus]_755716562
STVEVATQLSMRNFELFRNIEPT----EYI-----DDLFK-L-KS----K-TSC-A----
-----NLKKFEEVINQETFWVASEILRETNQLKRMKIIKHFIKIA-
LHCRE-CKNFNSMFAIISGLNLAPVARLRTTWEKLP NKYEKLFQDLQDLFDPSRNMAKYR
NVLNSQNLQP-----PIIPL-FPVIKKDLTFL-----
-----HEGND--SKV-----D---GLVNFE-KLRMIAKEI---RHVGRMASVNMDP--
-----
>Rapgef2_[Ficedula_albicollis]_1020979019
STVEVATQLSMRNFELFRNIEPT----EYI-----DDLFK-L-KS----K-TGC-T----
-----NLKRFEVINQETFWVASEILRETNQLKRMKIIKHFIKIA-
LHCRE-CKNFNSMFAIISGLNLAPVARLRTTWEKLP SKYEKLFQDLQDLFDPSRNMAKYR
NVLNSQNLQP-----PIIPL-FPVIKKDLTFL-----
-----HEGND--SKV-----E---GLVNFE-KLRMIAKEI---RHVGRMASVNMDP--
-----
>Rapgef2_[Fundulus_heteroclitus]_831545559
STVEVATQLSMRAFELFCAIEPT----EYI-----DDLFK-L-RS----K-TGS-V----
-----SLKHFEESINQETFWVATEVVREPNQLKRMKIVKHFIKIA-
LHCRE-CKNFNSMFAIISGLNLAPVSRRLGTWEKLP SKYEKLFQDLQDLFDPSRNMAKYR
NVLNNQNLQP-----PIIPL-FPVIKKDLTFL-----
-----HEGND--SKV-----D---GLVNFE-KLRMIAKEI---RHVGRMASVNMDP--
-----
>Rapgef2_[Haliaeetus_albicilla]_700326780
STVEVATQLSMRNFELFRNIEPT----EYI-----DDLFK-L-KS----K-TGC-T----
-----NLKKFEEVINQETFWVASEILRETNQLKRMKIIKHFIKIA-
LHCRE-CKNFNSMFAIISGLNLAPVARLRTTWEKLP SKYEKLFQDLQDLFDPSRNMAKYR
NVLNSQNLQP-----PIIPL-FPVIKKDLTFL-----
-----HEGND--SKV-----E---GLVNFE-KLRMIAKEI---RHVGRMASVNMDP--
-----
>Rapgef2_[Haliaeetus_leucocephalus]_729726819
STVEVATQLSMRNFELFRNIEPT----EYI-----DDLFK-L-KS----K-TGC-T----
-----NLKKFEEVINQETFWVASEILRETNQLKRMKIIKHFIKIA-
```

LHCRE-CKNFNSMFAIISGLNLAPVARLRTTWEKLP SKYEKLFQDLQDLFDPSRNMAKYR  
 NVLNSQNLQP-----PIIPL-FPVIKKDLTFL-----  
 -----HEGND--SKV-----E---GLVNFE-KLRMIAKEI---RHVGRMASVNMDP--  
 -----  
 >Rapgef2\_[Harpegnathos\_saltator]\_749732961  
 ---EVAIQLTLQDFSIFRQIEST----EYV-----DDL FV-L-KS----R-YGV-PM---  
 -----LSQFAELVNREMFVVTEVCSEHNLVRRSKI IKQFIKIA-  
 RQCKE-CKNFNSMFAIVSGLGHGAVSRLRASWEKLP TKYQRLFSDLQELMDPSRNMSKYR  
 QLVASEQTQP-----PIIPF-YPVVKKDLTFI-----  
 -----NLGND--SRV-----E---GLVNFE-KLRMIAKEV---RTL TNMCSSPYD---  
 -----  
 >Rapgef2\_[Heterocephalus\_glaber]\_351696315  
 -----K-TSC-A-----  
 -----NLKKFEEVINQETFWVASEILRETNQLKRMKI IKHFIKIA-  
 LHCRE-CKNFNSMFAIISGLNLAPVARLRTTWEKLP NKYEKLFQDLQDLFDPSRNMAKYR  
 NVLNSQNLQP-----PIIPL-FPVIKKDLTFL-----  
 -----HEGND--SKV-----D---GLVNFE-KLRMIAKEI---RHVGRMASVNMDP--  
 -----  
 >Rapgef2\_[Ictalurus\_punctatus]\_1042371529  
 STVEVATQLSMRAFELFCAIEPT----EYI-----DDL FK-L-RS----RSSGL-S----  
 -----SLKLFEESINRETFWVATEVLREPNQLKRMKI IKHFIKIA-  
 LHCRE-CKNFNSMFAIISGLNLAPVSRMRGTWEKLP SKYEKLFSDLQDLFDPSRNMAKYR  
 NVLNSQNLQP-----PIIPL-FPVIKKDLTFL-----  
 -----HEGND--SKV-----D---GLVNFE-KLRMIAKEI---RHV-----  
 -----  
 >Rapgef2\_[Ictidomys\_tridecemlineatus]\_914915193  
 STVEVATQLSMRNFELFRNIEPT----EYI-----DDL FK-L-KS----K-TSC-H----  
 -----NLKKFEEVINQETFWVASEILRETNQLKRMKI IKHFIKIA-  
 LHCRE-CKNFNSMFAIISGLNLAPVARLRATWEKLP NKYEKLFQDLQDLFDPSRNMAKYR  
 NVLNSQNLQP-----PIIPL-FPVIKKDLTFL-----  
 -----HEGND--SKV-----D---GLVNFE-KLRMIAKEI---RHVGRMASVNMDP--  
 -----  
 >Rapgef2\_[Kryptolebias\_marmoratus]\_1041100174  
 STVEVATQLSMRAFELFCAIEPT----EYI-----DDL FK-L-RS----K-VGS-V----  
 -----SLKRFEESINHETFWVATEVVREPNQLKRMKI VKHFIKIA-  
 LHCRE-CKNFNSMFAIISGLNLAPVSRLRG TWEKLP SKYEKLF GDLQDLFDPSRNMAKYR  
 NVLNNQNLQP-----PIIPL-FPVIKKDLTFL-----  
 -----HEGND--SKV-----D---GLVNFE-KLRMIAKEI---RHVGRMASVNMDP--  
 -----  
 >Rapgef2\_[Latimeria\_chalumnae]\_556992865  
 STIEVATQLSMRNFELFRNIEAT----EYI-----DDL FK-L-KT----K-VGS-S----  
 -----NLKKFEEVINQETFWVASEILKELNQIKRMKI IKHFIKIA-  
 LHCRE-CKNFNSMFAIISGLNLAPVARLRSTWEKLP NSKYKLFQDLQDLFDPSRNMAKYR  
 NVLNSQNLQP-----PIIPL-FPVIKKDLTFL-----  
 -----HEGND--SKV-----E---GLVNFE-KLRMIAKEI---RHVGRMASVNMDP--  
 -----  
 >Rapgef2\_[Lepisosteus\_oculatus]\_972965628  
 STVEVATQLSMRNFELFCNIEPT----EYI-----DDL FK-L-KS----R-TGS-A----  
 -----NLKKFEEVINQETFWVASEIVREQNQIKRMKI IKHFIKIA-  
 LHCRE-CKNFNSMFAIISGLNLAPVSRLRG TWEKLP SKYEKLFQDLQDLFDPSRNMAKYR  
 NVLNSQNLQP-----PIIPL-FPVIKKDLTFL-----  
 -----HEGND--SKV-----D---GLVNFE-KLRMIAKEI---RHVGRMASVNMDP--  
 -----  
 >Rapgef2\_[Leptonychotes\_weddellii]\_585176488

STVEVATQLSMRNFELFRNIEPT----EYI-----DDLFK-L-KS----K-TSC-A----  
-----NLKKFEEVINQETFWVASEILRETNQLKRMKIIKHFIKIA-  
LHCRE-CKNFNSMFAIISGLNLAPVARLRTTWEKLPNKYEKLFQDLQDLFDPSRNMAKYR  
NVLNSQNLQP-----PIIPL-FPVIKKDLTFL-----  
-----HEGND--SKV-----D---GLVNFE-KLRMIAKEI---RHVGRMASVNMDP--  
-----

>Rapgef2\_[Limulus\_polyphemus]\_926643048

-----FWVVTEVCSEPNPLRRMKIIKQFIKIA-  
RQCKE-CKNLNSMFAILSGLDHGAVSRLRSSWEKLP SKYSKMFKDLSDFMDPSRNMC KYR  
TLISSEHTQP-----PRIPF-YPIVRKDL MFI-----  
-----HLGND--TKV-----E---GLINFE-KLRMIAKEI---RQL-----  
-----

>Rapgef2\_[Lingula\_anatina]\_919048487

-SIEIATQLTLEDHFHIFANIEAT----EYI-----DDLFD-L-PS----K-YGT-P----  
-----NILQFQELVNREMFVVTTEVVRETNIIKRMKIIKHFIKIA-  
RHCKE-CKNFNSMFAILSGLGHGSVQRLRTTWDKLPNKYVKIYEDLQTIMDPSRNMAKYR  
NLINSELVQP-----PLIPL-FPIVKKDLTFI-----  
-----HLGND--SKV-----D---GLVNFE-KLRMIAKEV---RHLCLMASAPYDPNA  
-----

>Rapgef2\_[Macaca\_mulatta]\_297293615

STVEVATQLSMRNFELFRNIEPT----EYI-----DDLFK-L-RS----K-TSC-A----  
-----NLKRFEVINQETFWVASEILRETNQLKRMKIIKHFIKIA-  
LHCRE-CKNFNSMFAIISGLNLAPVARLRTTWEKLPNKYEKLFQDLQDLFDPSRNMAKYR  
NVLNSQNLQP-----PIIPL-FPVIKKDLTFL-----  
-----HEGND--SKV-----D---GLVNFE-KLRMIAKEI---RHVGRMASVNMDP--  
-----

>Rapgef2\_[Macaca\_nemestrina]\_795381724

STVEVATQLSMRNFELFRNIEPT----EYI-----DDLFK-L-RS----K-TSC-A----  
-----NLKRFEVINQETFWVASEILRETNQLKRMKIIKHFIKIA-  
LHCRE-CKNFNSMFAIISGLNLAPVARLRTTWEKLPNKYEKLFQDLQDLFDPSRNMAKYR  
NVLNSQNLQP-----PIIPL-FPVIKKDLTFL-----  
-----HEGND--SKV-----D---GLVNFE-KLRMIAKEI---RHVGRMASVNMDP--  
-----

>Rapgef2\_[Mandrillus\_leucophaeus]\_795325386

STVEVATQLSMRNFELFRNIEPT----EYI-----DDLFK-L-RS----K-TSC-A----  
-----NLKRFEVINQETFWVASEILRETNQLKRMKIIKHFIKIA-  
LHCRE-CKNFNSMFAIISGLNLAPVARLRTTWEKLPNKYEKLFQDLQDLFDPSRNMAKYR  
NVLNSQNLQP-----PIIPL-FPVIKKDLTFL-----  
-----HEGND--SKV-----D---GLVNFE-KLRMIAKEI---RHVGRMASVNMDP--  
-----

>Rapgef2\_[Maylandia\_zebra]\_498996321

STVEVATQLSMRAFELFCAIEPT----EYI-----DDLFK-L-RS----K-TGS-V----  
-----SLKRFEAINHETFWVATEVTREPNQLKRMKIIKHFIKIA-  
LHCRE-CKNFSSMFAIISGLNLAPVSR LGRTWEKLP SKYEKLF GDLQDLFDPSRNMAKYR  
NVLNSQNLQP-----PIIPL-FPVIKKDLTFL-----  
-----HEGND--SKV-----D---GLVNFE-KLRMIAKEI---RHVGRMASVNMDP--  
-----

>Rapgef2\_[Melipona\_quadri-fasciata]\_925684072

---EVAIQTLTLDQFSIFRQIEST----EYV-----DDLFE-L-KS----R-YGV-PM---  
-----LRQFAELVNREMFVVTTEVCSEHNLVRRSKIIKQFIKIA-  
RQCKE-CKNFNSMFAIVSGLGHGAVSRLRASWEKLP SKYQRLFSDLQELMDPSRNMSKYR  
QLVASEQTQP-----PIIPF-YPVVKDLTFI-----  
-----HLGND--SRV-----E---GLVNFE-KLRMIAKEV---RTLTMCCSSPYD---



```

-----
>Rapgef2_[Melopsittacus_undulatus]_884809301
STVEVATQLSMRNFELFRNIEPT----EYI-----DDLFK-L-KS----K-TGC-T----
-----NLKKFEEVINQETFWVASEILRETNQLKRMKIIKHFIKIA-
LHCRE-CKNFNSMFAIISGLNLAPVARLRTTWEKLP SKYEKLFQDLQDLFDPSRNMAKYR
NVLNSQNLQP-----PIIPL-FPVIKKDLTFL-----
-----HEGND--SKV-----E---GLVNFE-KLRMIAKEI---RHVGRMASVNMDP--
-----

>Rapgef2_[Merops_nubicus]_675617135
STVEVATQLSMRNFELFRNIEPT----EYI-----DDLFK-L-KS----K-TGC-T----
-----NLKKFEEVINQETFWVASEILRETNQLKRMKIIKHFIKIA-
LHCRE-CKNFNSMFAIISGLNLAPVARLRTTWEKLP SKYEKLFQDLQDLFDPSRNMAKYR
NVLNSQNLQP-----PIIPL-FPVIKKDLTFL-----
-----HEGND--SKV-----E---GLVNFE-KLRMIAKEI---RHVGRMASVNMDP--
-----

>Rapgef2_[Mesocricetus_auratus]_880915360
STVEVATQLSMRNFELFRNIEPT----EYI-----DDLFK-L-KS----K-TSC-A----
-----NLKKFEEVINQETFWVASEILRETNQLKRMKIIKHFIKIA-
LHCRE-CKNFNSMFAIISGLNLAPVARLRTTWEKLP NKYEKLFQDLQDLFDPSRNMAKYR
NVLSGQNLQP-----PVIPL-FPVIKKDLTFL-----
-----HEGND--SKV-----D---GLVNFE-KLRMIAKEI---RHVGRMASVNMDP--
-----

>Rapgef2_[Metaseiulus_occidentalis]_391327442
-SGEVAAQLTLKDFEIFQQIEPT----EYV-----DDLFR-VFQS----R-YGA-PM---
-----LSKFADLVNREMFWVVTQIVSEPNVVRMRMTVKQFIKLA-
RYFRE-FKNFNSMFAISGLGHQAVSRLKNTWDKLP SKYHRIFQDLQELMDPSRNMCRYR
TLVT--RLHP-----PLIPF-YPVVHKDLSFI-----
-----HFGND--TLV-----D---GLVNFE-KLRMVSKEV---RTLNMNCSQPYVFP
LASSSSNN-----

>Rapgef2_[Microplitis_demolitor]_665818790
---EVAIQLTLQDFSIFRQIEST----EYV-----DDLFE-L-KS----R-YGV-PM---
-----LSQFAELVNREMFWVTEVCSEHNLVRRSKIIKQFIKIA-
RQCKE-CKNFNSMFAIVSGLGHGAVSRLRASWEKLP SKYQRLFSDLQELMDPSRNM SKYR
QLVASEQTQP-----PIIPF-YPVVKKDLTFI-----
-----HLGND--SRV-----E---NLVNFE-KLRMIAKEV---RTLTMNMCSSPYD---
-----

>Rapgef2_[Monodelphis_domestica]_612030789
STVEVATQLSMRNFELFRNIEPT----EYI-----DDLFK-L-KS----K-TSC-A----
-----NLKKFEEVINQETFWVASEILRETNQLKRMKTIKHFIKIA-
LHCRE-CKNFNSMFAIISGLNLAPVARLRTTWEKLP SKYEKLFQDLQDLFDPSRNMAKYR
NVLNSQNLQP-----PIIPL-FPVIKKDLTFL-----
-----HEGND--SKV-----D---GLVNFE-KLRMIAKEI---RHVGRMASVNMDP--
-----

>Rapgef2_[Mus_musculus]_887221696
STVEVATQLSMRNFELFRNIEPT----EYI-----DDLFK-L-KS----K-TSC-A----
-----NLKKFEEVINQETFWVASEILRETNQLKRMKIIKHFIKIA-
LHCRE-CKNFNSMFAIISGLNLAPVARLRTTWEKLP NKYEKLFQDLQDLFDPSRNMAKYR
NVLSGQNLQP-----PVIPL-FPVIKKDLTFL-----
-----HEGND--SKV-----D---GLVNFE-KLRMIAKEI---RHVGRMASVNMDP--
-----

>Rapgef2_[Mustela_putorius_furo]_859933738
STVEVATQLSMRNFELFRNIEPT----EYI-----DDLFK-L-KS----K-TSC-A----
-----NLKKFEEVINQETFWVASEILRETNQLKRMKIIKHFIKIA-
LHCRE-CKNFNSMFAIISGLNLAPVARLRTTWEKLP NKYEKLFQDLQDLFDPSRNMAKYR

```

```

NVLNSQNLQP-----PIIPL-FPVIKKDLTFL-----
-----HEGND--SKV-----D---GLVNFE-KLRMIAKEI---RHVGRMASVNMDP--
-----
>Rapgef2_[Myotis_davidii]_584034002
STVEVATQLSMRNFELFRNIEPT----EYI-----DDLFK-L-KS----K-TSC-A----
-----NLKKFEEVINQETFWVASEILRETNQLKRMKIIKHFIKIA-
LHCRE-CKNFNSMFAIISGLNLAPVARLRTTWEKLPNKYEKLFQDLQDLFDPSRNMAKYR
NVLNSQNLQP-----PIIPL-FPVIKKDLTFL-----
-----HEGND--SKV-----D---GLVNFE-KLRMIAKEI---RHVGRMASVNMDP--
-----
>Rapgef2_[Myotis_lucifugus]_558098423
STVEVATQLSMRNFELFRNIEPT----EYI-----DDLFK-L-KS----K-TSC-A----
-----NLKKFEEVINQETFWVASEILRETNQLKRMKIIKHFIKIA-
LHCRE-CKNFNSMFAIISGLNLAPVARLRTTWEKLPNKYEKLFQDLQDLFDPSRNMAKYR
NVLNSQNLQP-----PIIPL-FPVIKKDLTFL-----
-----HEGND--SKV-----D---GLVNFE-KLRMIAKEI---RHVGRMASVNMDP--
-----
>Rapgef2_[Nannospalax_galili]_674089172
STVEVATQLSMRNFELFRNIEPT----EYI-----DDLFK-L-KS----K-TSC-A----
-----NLKKFEEVINQETFWVASEILRETNQLKRMKIIKHFIKIA-
LHCRE-CKNFNSMFAIISGLNLAPVARLRTTWEKLPNKYEKLFQDLQDLFDPSRNMAKYR
NVLSGQNLQP-----PVIPL-FPVIKKDLTFL-----
-----HEGND--SKV-----D---GLVNFE-KLRMIAKEI---RHVGRMASVNMDP--
-----
>Rapgef2_[Nasonia_vitripennis]_1032757806
---EVAAQLTFQDFNIFRQIEST----EYV-----DDLFE-L-KS----K-YGV-PM---
-----LSQFAELVNREMFVVTEVCSEHNIVRRSKIIKQFIKIA-
RQCKE-CKNFNSMFAIVSGLGHGAVSRLRASWEKLP SKYQRLFSDLQELMDPSRNMSKYR
QLVASEQTQP-----PIIPF-YPVVKKDLTFI-----
-----HLGND--SRV-----E---GLVNFE-KLRMIAKEV---RTL-----
-----
>Rapgef2_[Nothobranchius_furzeri]_1007706563
STVEVATQLSMRAFELFCAIEPT----EYI-----DDLFK-L-HS----K-TGS-V----
-----SLKRFEESINHETFWVATEVVRESNQLKRMKIVKHFIKIA-
LHCRE-CKNFNSMFAIISGLNLAPVSRLRGTTWEKLP SKYEKLF GDLQDLFDPSRNMAKYR
NVLNNQNLQP-----PIIPL-FPVIKKDLTFL-----
-----HEGND--SKV-----D---GLVNFE-KLRMIAKEI---RHVGRMASVNMDP--
-----
>Rapgef2_[Ochotona_princeps]_837819646
STVEVATQLSMRNFELFRNIEPT----EYI-----DDLFK-L-KS----K-TSC-A----
-----NLKKFEEVINQETFWVASEILRETNQLKRMKIIKHFIKIA-
LHCRE-CKNFNSMFAIISGLNLAPVARLRTTWEKLPNKYEKLFQDLQDLFDPSRNMAKYR
NVLNSQNLQP-----PVIPL-FPVIKKDLTFL-----
-----HEGND--SRV-----D---GLVNFE-KLRMIAKEI---RHVGRMASVNMDP--
-----
>Rapgef2_[Octodon_degus]_820993492
STVEVSAQLSVRNFELFRNIEPT----EYI-----DDLFR-L-RS----K-TSC-A----
-----NLKRFEDVINQETFWVASEILRETNQLKRMKIIKHFIKIA-
LHCRE-CKNFNSMFAIISGLNLAPVARLRTTWEKLPNKYEKLFQDLQDLFDPSRNMAKYR
NVLNSQNLQP-----PIIPL-FPVIKKDLTFL-----
-----HEGND--SKV-----D---GLVNFE-KLRMIAKEI---RHVGRMASVNMDP--
-----
>Rapgef2_[Odobenus_rosmarus_divergens]_472349156
STVEVATQLSMRNFELFRNIEPT----EYI-----DDLFK-L-KS----K-TSC-A----

```

```

-----NLKKFEEVINQETFWVASEILRETNQLKRMKIIKHFIKIA-
LHCRE-CKNFNSMFAIISGLNLAPVARLRTTWEKLPNKYEKLFQDLQDLFDPSRNMAKYR
NVLNSQNLQP-----PIIPL-FPVIKKDLTFL-----
-----HEGND--SKV-----D---GLVNFE-KLRMIAKEI---RHVGRMASVNMDP--
-----

>Rapgef2_[Opisthocomus_hoazin]_700389884
STVEVATQLSMRNFELFRNIEPT----EYI-----DDLFE-L-KS----K-TGC-T----
-----NLKKFEEVINQETFWVASEILRETNQLKRMKIIKHFIKIA-
LHCRE-CKNFNSMFAIISGLNLAPVARLRTTWEKLPNKYEKLFQDLQDLFDPSRNMAKYR
NVLNSQNLQP-----PIIPL-FPVIKKDLTFL-----
-----HEGND--SKV-----E---GLVNFE-KLRMIAKEI---RHVGRMASVNMDP--
-----

>Rapgef2_[Ornithorhynchus_anatinus]_345307480
STVEVATQLSMRNFELFRNIEPT----EYI-----DDLFE-L-KS----K-TSC-V----
-----NLKKFEEVINQETFWVASEILRETNQLKRMKIIKHFIKIA-
LHCRE-CKNFNSMFAIISGLNLAPVARLRTTWEKLPNKYEKLFQDLQDLFDPSRNMAKYR
NVLNSQNLQP-----PIIPL-FPVIKKDLTFL-----
-----HEGND--SKV-----D---GLVNFE-KLRMIAKEI---RHVGRMASVNMDP--
-----

>Rapgef2_[Orussus_abietinus]_817220788
---EVAIQTLTLQDFSIFRQIEST----EYV-----DDLFE-L-KS----R-YGV-PM---
-----LSQFAELVNREMFVWVTEVCSEHNLVRRSKI IKQFIKIA-
RQCKE-CKNFNSMFAIVSGLGHGAVSRLRASWEKLPNKYQRLFSDLQELMDPSRNMSKYR
QLVASEQTQP-----PIIPF-YPVVKDLTFI-----
-----HLGND--SRV-----E---NLVNFE-KLRMIAKEI---RTL-----
-----

>Rapgef2_[Orycteropus_afer_afer]_634878373
STVEVATQLSMRNFELFRNIEPT----EYI-----DDLFE-L-KS----K-TNC-A----
-----NLKKFEEVINQETFWVASEILRETNQLKRMKIIKHFIKIA-
LHCRE-CKNFNSMFAIISGLNLAPVARLRTTWEKLPNKYEKLFQDLQDLFDPSRNMAKYR
NVLNSQNLQP-----PIIPL-FPVIKKDLTFL-----
-----HEGND--SKV-----D---GLVNFE-KLRMIAKEI---RHVGRMASVNMDP--
-----

>Rapgef2_[Oryctolagus_cuniculus]_655879045
STVEVATQLSMRNFELFRNIEPT----EYI-----DDLFE-L-KS----K-TSC-A----
-----NLKQFEEVINQETFWVASEILRETNQLKRMKIIKHFIKIA-
LHCRE-CKNFNSMFAIISGLNLAPVARLRTTWEKLPNKYEKLFQDLQDLFDPSRNMAKYR
NVLNSQNLQP-----PIIPL-FPVIKKDLTFL-----
-----HEGND--SKV-----D---GLVNFE-KLRMIAKEI---RHVGRMASVNMDP--
-----

>Rapgef2_[Ovis_aries_musimon]_803287877
STVEVATQLSMRNFELFRNIEPT----EYI-----DDLFE-L-KS----K-TSC-A----
-----NLKTFEEVINQETFWVASEILRETNQLKRMKIIKHFIKIA-
LHCRE-CKNFNSMFAIISGLNLAPVARLRTTWEKLPNKYEKLFQDLQDLFDPSRNMAKYR
NVLNSQNLQP-----PIIPL-FPVIKKDLTFL-----
-----HEGND--SKV-----D---GLVNFE-KLRMIAKEI---RHVGRMASVNMDP--
-----

>Rapgef2_[Ovis_aries]_803171614
STVEVATQLSMRNFELFRNIEPT----EYI-----DDLFE-L-KS----K-TSC-A----
-----NLKTFEEVINQETFWVASEILRETNQLKRMKIIKHFIKIA-
LHCRE-CKNFNSMFAIISGLNLAPVARLRTTWEKLPNKYEKLFQDLQDLFDPSRNMAKYR
NVLNSQNLQP-----PIIPL-FPVIKKDLTFL-----
-----HEGND--SKV-----D---GLVNFE-KLRMIAKEI---RHVGRMASVNMDP--
-----

```

```

>Rapgef2_[Pan_paniscus]_931570497
STVEVATQLSMRNFELFRNIEPT----EYI-----DDLFFK-L-RS----K-TSC-A----
-----NLKRFEVINQETFWVASEILRETNQLKRMKIIKHFIKIA-
LHCRE-CKNFNSMFAIISGLNLAPVARLRTTWEKLPNKYEKLFQDLQDLFDPSRNMAKYR
NVLNSQNLQP-----PIIPL-FPVIKKDLTFL-----
-----HEGND--SKV-----D---GLVNFE-KLRMIAKEI---RHVGRMASVNMDP--
-----

>Rapgef2_[Pan_troglodytes]_694909391
STVEVATQLSMRNFELFRNIEPT----EYI-----DDLFFK-L-RS----K-TSC-A----
-----NLKRFEVINQETFWVASEILRETNQLKRMKIIKHFIKIA-
LHCRE-CKNFNSMFAIISGLNLAPVARLRTTWEKLPNKYEKLFQDLQDLFDPSRNMAKYR
NVLNSQNLQP-----PIIPL-FPVIKKDLTFL-----
-----HEGND--SKV-----D---GLVNFE-KLRMIAKEI---RHVGRMASVNMDP--
-----

>Rapgef2_[Panthera_tigris_altaica]_987408706
STVEVATQLSMRNFELFRNIEPT----EYI-----DDLFFK-L-KS----K-TSC-A----
-----NLKKFEVINQETFWVASEILRETNQLKRMKIIKHFIKIA-
LHCRE-CKNFNSMFAIISGLNLAPVARLRTTWEKLPNKYEKLFQDLQDLFDPSRNMAKYR
NVLNSQNLQP-----PIIPL-FPVIKKDLTFL-----
-----HEGND--SKV-----D---GLVNFE-KLRMIAKEI---RHVGRMASVNMDP--
-----

>Rapgef2_[Papilio_polytes]_909561101
---EVAVQLTLQDFCIFRQIEST----EYV-----DDLFE-L-KS----R-YGT-PM---
-----LSQFAGLVNKEMFWVTEVVNEQNLVRRSKIVKQFIKVA-
RHCKE-CKNFNSMFAIISGLGHGAVSRLRLTWEKLPKYIKLFSDLQMLMDPSRNMSKYR
QLVTTEQGRS-----PVIPL-FPVIKKDLTFL-----
-----HLGND--TKV-----E---GMVNFE-KLRMIAKEV---RTLTMCCSSPYD---
-----

>Rapgef2_[Papio_anubis]_685543722
STVEVATQLSMRNFELFRNIEPT----EYI-----DDLFFK-L-RS----K-TSC-A----
-----NLKRFEVINQETFWVASEILRETNQLKRMKIIKHFIKIA-
LHCRE-CKNFNSMFAIISGLNLAPVARLRTTWEKLPNKYEKLFQDLQDLFDPSRNMAKYR
NVLNSQNLQP-----PIIPL-FPVIKKDLTFL-----
-----HEGND--SKV-----D---GLVNFE-KLRMIAKEI---RHVGRMASVNMDP--
-----

>Rapgef2_[Parus_major]_998685096
STVEVATQLSMRNFELFRNIEPT----EYI-----DDLFFK-L-KS----K-TGC-T----
-----NLKRFEVINQETFWVASEILRETNQLKRMKIIKHFIKIA-
LHCRE-CKNFNSMFAIISGLNLAPVARLRTTWEKLPNKYEKLFQDLQDLFDPSRNMAKYR
NVLNSQNLQP-----PIIPL-FPVIKKDLTFL-----
-----HEGND--SKV-----E---GLVNFE-KLRMIAKEI---RHVGRMASVNMDP--
-----

>Rapgef2_[Pelodiscus_sinensis]_558156869
STIEMAAQLSMRNFELFRNIEPT----EYI-----DDLFFK-L-KS----K-TSC-A----
-----NLKKFEVINQETFWVASEILRETNQLKRMKIIKHFIKIA-
LHCRE-CKNFNSMFAIISGLNLAPVARLRTTWEKLPNKYEKLFQDLQDLFDPSRNMAKYR
NVLNSQNLQP-----PIIPL-FPVIKKDLTFL-----
-----HEGND--SKV-----E---GLVNFE-KLRMIAKEI---RHVGRMASVNIDP--
-----

>Rapgef2_[Peromyscus_maniculatus_bairdii]_1008761806
STVEVATQLSMRNFELFRSIEPT----EYI-----DDLFFK-L-KS----K-TSC-A----
-----NLKTFEVINQETFWVASEILRETNQLKRMKIIKHFIKIA-
LHCRE-CKNFNSMFAIISGLNLAPVARLRTTWEKLPNKYEKLFQDLQDLFDPSRNMAKYR
NVLSGQNLQP-----PVIPL-FPVIKKDLTFL-----

```

```

-----HEGND--SKV-----D---GLVNFE-KLRMIAKEI---RHVGRMASVNMDP--
-----
>Rapgef2_[Phaethon_lepturus]_723143942
STVEVATQLSMRNFELFRNIEPT----EYI-----DDLFE-L-KS----K-TGC-T----
-----NLKKFEEVINQETFWVASEILRETNQLKRMKIIKHFIKIA-
LHCRE-CKNFNSMFAIISGLNLAPVARLRTTWEKLP SKYEKLFQDLQDLFDPSRNMAKYR
NVLNSQNLQP-----PIIPL-FPVIKKDLTFL-----
-----HEGND--SKV-----E---GLVNFE-KLRMIAKEI---RHVGRMASVNMDP--
-----
>Rapgef2_[Physeter_catodon]_593730225
STVEVATQLSMRNFELFRNIEPT----EYI-----DDLFE-L-KS----K-ASC-A----
-----NLKKFEEVINQETFWVASEILREANQLKRMKIIKHFIKIA-
LHCRE-CKNFNSMFAIISGLNLAPVARLRTTWEKLP NKYEKLFQDLQDLFDPSRNMAKYR
NVLNSQNLQP-----PIIPL-FPVIKKDLTFL-----
-----HEGND--SKV-----D---GLVNFE-KLRMIAKEI---RHVGRMASVNMDP--
-----
>Rapgef2_[Plutella_xylostella]_768419725
---EVAVQLTLQDFCIFRQIEST----EYV-----DDLFE-L-NS----R-YGT-PM---
-----LSQFAELVNKEMFWVTEVVTEQNPVRRSKIIKQFIKVA-
RHCKE-CKNFNSMFAIISGLGHGAVSRLRMSWEKLP TKYLKLFSDLQTLMDPSRNMSKYR
QLLTTEQVRS-----PVVPF-YPVVRKDLTFI-----
-----HLGND--TKV-----E---GMVNFE-KLRMIAKEV---RTLVMCSPYD---
-----
>Rapgef2_[Poecilia_formosa]_1025435386
STVEVATQLSMRAFELFCAIEPT----EYI-----DDLFE-L-RS----K-TGS-V----
-----SLKRFEESINHETFWVATEVVREPNQLKRMKIIKHFIKIA-
LHCRE-CKNFNSMFAIISGLNLAPVSRLRGTTWEKLP SKYEKLFQDLQDLFDPSRNMAKYR
NVLNNQNLQP-----PIIPL-FPVIKKDLTFL-----
-----HEGND--SKV-----D---GLVNFE-KLRMIAKEI---RHVGRMASVNMDP--
-----
>Rapgef2_[Poecilia_latipinna]_961993309
STVEVATQLSMRAFELFCAIEPT----EYI-----DDLFE-L-RS----K-TGS-V----
-----SLKRFEESINHETFWVATEVVREPNQLKRMKIIKHFIKIA-
LHCRE-CKNFNSMFAIISGLNLAPVSRLRGTTWEKLP SKYEKLFQDLQDLFDPSRNMAKYR
NVLNNQNLQP-----PIIPL-FPVIKKDLTFL-----
-----HEGND--SKV-----D---GLVNFE-KLRMIAKEI---RHVGRMASVNMDP--
-----
>Rapgef2_[Poecilia_reticulata]_1039360321
STVEVATQLSMRAFELFCAIEPT----EYI-----DDLFE-L-RS----K-TGS-V----
-----SLKRFEESINHETFWVATEVVREPNQLKRMKIIKHFIKIA-
LHCRE-CKNFNSMFAIISGLNLAPVSRLRGTTWEKLP SKYEKLFQDLQDLFDPSRNMAKYR
NVLNNQNLQP-----PIIPL-FPVIKKDLTFL-----
-----HEGND--SKV-----D---GLVNFE-KLRMIAKEI---RHVGRMASVNMDP--
-----
>Rapgef2_[Pogonomyrmex_barbatus]_769831300
---EVAIQTLTLQDFSIFRQIEST----EYV-----DDLFE-L-KS----R-YGV-PM---
-----LSQFAELVNREMFVWVTEVCSEHNLVRRSKIIKQFIKIA-
RQCKE-CKNFNSMFAIISGLGHGAVSRLRASWEKLP TKYQRLFSDLQELMDPSRNMSKYR
QLVASEQTQP-----PIIPF-YPVVKDLTFI-----
-----HLGND--SRV-----E---GLVNFE-KLRMIAKEV---RTLTMCSPPYD---
-----
>Rapgef2_[Pongo_abelii]_686717383
STVEVATQLSMRNFELFRNIEPT----EYI-----DDLFE-L-RS----K-TSC-A----
-----NLKRFEVINQETFWVASEILRETNQLKRMKIIKHFIKIA-

```

LHCRE-CKNFNSMFAIISGLNLAPVARLRTTWEKLPNKYEKLFQDLQDLFDPSRNMAKYR  
 NVLNSQNLQP-----PIIPL-FPVIKKDLTFL-----  
 -----HEGND--SKV-----D---GLVNFE-KLRMIAKEI---RHVGRMASVNMDP--  
 -----  
 >Rapgef2\_[Propithecus\_coquereli]\_826315266  
 STVEVATQLSMRNFELFRNIEPT----EYI-----DDLFK-L-KS----K-TGC-A----  
 -----NLKKFEEVINQETFWVASEILRETNQLKRMKIIKHFIKIA-  
 LHCRE-CKNFNSMFAIISGLNLAPVARLRTTWEKLPNKYEKLFQDLQDLFDPSRNMAKYR  
 NVLNSQNLQP-----PIIPL-FPVIKKDLTFL-----  
 -----HEGND--SKV-----D---GLVNFE-KLRMIAKEI---RHVGRMASVNMDP--  
 -----  
 >Rapgef2\_[Protobothrops\_mucrosquamatus]\_1002581465  
 STIEVATQLSMRNFELFRNIEPT----EYI-----DDLFK-L-KS----K-FNC-A----  
 -----NLKKFEEVINQETFWVASEILRETNQLKRMKIIKHFIKIA-  
 LHCRE-CKNFNSMFAIISGLNLAPVARLRTTWEKLPNKEYEKLQDLQDLFDPSRNMAKYR  
 NVLNSQNLQP-----PVIPL-FPVIKKDLTFL-----  
 -----HEGND--SKV-----E---GLVNFE-KLRMIAKEI---RHVGRMASVNMDP--  
 -----  
 >Rapgef2\_[Pseudopodoces\_humilis]\_929412532  
 STVEVATQLSMRNFELFRNIEPT----EYI-----DDLFK-L-KS----K-TGC-T----  
 -----NLKKFEEVINQETFWVASEILRETNQLKRMKIIKHFIKIA-  
 LHCRE-CKNFNSMFAIISGLNLAPVARLRTTWEKLPNKEYEKLQDLQDLFDPSRNMAKYR  
 NVLNSQNLQP-----PIIPL-FPVIKKDLTFL-----  
 -----HEGND--SKV-----E---GLVNFE-KLRMIAKEI---RHVGRMASVNMDP--  
 -----  
 >Rapgef2\_[Pterocles\_gutturalis]\_704502780  
 STVEVATQLSMRNFELFRNIEPT----EYI-----DDLFK-L-KS----K-TGC-T----  
 -----NLKKFEEVINQETFWVASEILRETNQLKRMKIIKHFIKIA-  
 LHCRE-CKNFNSMFAIISGLNLAPVARLRTTWEKLPNKEYEKLQDLQDLFDPSRNMAKYR  
 NILNSQNLQP-----PIIPL-FPVIKKDLTFL-----  
 -----HEGND--SKV-----E---GLVNFE-KLRMIAKEI---RHVGRMASVNMDP--  
 -----  
 >Rapgef2\_[Rhinopithecus\_roxellana]\_724803574  
 STVEVATQLSMRNFELFRNIEPT----EYI-----DDLFK-L-RS----K-TSC-A----  
 -----NLKRFEVINQETFWVASEILRETNQLKRMKIIKHFIKIA-  
 LHCRE-CKNFNSMFAIISGLNLAPVARLRTTWEKLPNKYEKLFQDLQDLFDPSRNMAKYR  
 NVLNSQNLQP-----PIIPL-FPVIKKDLTFL-----  
 -----HEGND--SKV-----D---GLVNFE-KLRMIAKEI---RHVGRMASVNMDP--  
 -----  
 >Rapgef2\_[Rousettus\_aegyptiacus]\_1012013897  
 STVEVATQLSMRNFELFRNIEPT----EYI-----DDLFK-L-KS----K-TSC-A----  
 -----NLKKFEEVINQETFWVASEILRETNQLKRMKIIKHFIKIA-  
 LHCRE-CKNFNSMFAIISGLNLAPVARLRTTWEKLPNKYEKLFQDLQDLFDPSRNMAKYR  
 NVLNSQNLQP-----PIIPL-FPVIKKDLTFL-----  
 -----HEGND--SKV-----D---GLVNFE-KLRMIAKEI---RHVGRMASVNMDP--  
 -----  
 >Rapgef2\_[Saimiri\_boliviensis\_boliviensis]\_403272230  
 STVEVATQLSMRNFELFRNIEPT----EYI-----DDLFK-L-RS----K-TSC-A----  
 -----NLKRFEVINQETFWVASEILRETNQLKRMKIIKHFIKIA-  
 LHCRE-CKNFNSMFAIISGLNLAPVARLRTTWEKLPNKYEKLFQDLQDLFDPSRNMAKYR  
 NVLNSQNLQP-----PIIPL-FPVIKKDLTFL-----  
 -----HEGND--SKV-----D---GLVNFE-KLRMIAKEI---RHVGRMASVNMDP--  
 -----  
 >Rapgef2\_[Sarcophilus\_harrisii]\_821490707

STVEVATQLSMRNFELFRNIEPT----EYI-----DDLFK-L-KS----K-TSC-V----  
-----NLKKFEEVINQETFWVASEILRETNQLKRMKTIKHFIIKIA-  
LHCRE-CKNFNSMFIIISGLNLAPVARLRTTWEKLP SKYEKLFQDLQDLFDPSRNMAKYR  
NVLSNQNLQP-----PIIPL-FPVIKKDLTFL-----  
-----HEGND--SKV-----D---GLVNFE-KLRMIAKEI---RHVGRMASVNMDP--  
-----  
>Rapgef2\_[Schistosoma\_haematobium]\_844865153  
--NELAARLTIDDYEIFRSVQST----EYI-----DEIFG-LSNA-HVNNISSC-VVGNN  
SNSNT-----GYATGHENLDRFTDLVNREAYWAPTEICNETNLNRRVDLLKRFIKLA-  
KLCRE-LRNFTNTMFCLLVLGHQTPVERLKQTWDRLPNKYNELASYLQMVLDTSRNFHHYR  
TLLSANNVSV-----PVL PY-LPLVLKDLTFI-----  
-----HLGNP--SCT-----PD--GLINFE-KLRMLAKEV---RAICR-----  
-----  
>Rapgef2\_[Scleropages\_formosus]\_938084963  
STVEVATQLSMRNFELFCNIEPT----EYI-----DDLFK-L-RS----R-TGS-A----  
-----NLKKFEEVINQETFWVASEIVHEPNQLKRMKIVKHFIIKIA-  
LHCRE-CKNFNSMFIIISGLNLAPVARLRGTWEKLP SKYEKLFQDLQDLFDPSRNMAKYR  
NVLSNQNLQP-----PIIPL-FPVIKKDLTFL-----  
-----HEGND--SKV-----D---GLVNFE-KLRMIAKEI---RHVGRMASVNMDP--  
-----  
>Rapgef2\_[Sinocyclocheilus\_anshuiensis]\_1024942047  
SCMEIANQLSARNYLLFSGIEPT----DYI-----TDLFK-L-HP----Q-EPP-T----  
-----NLRNFEDLVNQETFWVATEIVQETNLAKRVKIIKHFIIKIA-  
LHCRD-CKNFNSMFIIISGFNLAPVSRLRSTWERLPGKYEKLLAELQDVFDPSRNMAKYR  
NLLNKHNLQP-----PVIPL-FPVIKKDLTFL-----  
-----HEGNK--SKV-----D---GLVNFE-KLRMIAREV---RHV-----  
-----  
>Rapgef2\_[Sinocyclocheilus\_grahami]\_1020462828  
-----  
-----ILKVFIKIA-  
LHCRD-CKNFNSMFIIISGFNLAPVSRLRSTWERLPGKYEKLLAELQDVFDPSRNMAKYR  
NLLNKHNLQP-----PVIPL-FPVIKKDLTFL-----  
-----HEGNK--SKV-----D---GLVNFE-KLRMIAREI---R-----  
-----  
>Rapgef2\_[Sinocyclocheilus\_rhinocerosus]\_1025229282  
STVEVATQLSMRAFELFCAIEPT----EYI-----DDLFK-L-KT----RLTRP-P----  
-----SLKLFEELAINRETFWVATEVVRETYQLKRMKIIKHFIIKIA-  
LHCRE-CKNFNSMFIIISGLNLAPVSRLRGTWEKLP SKYEKLFSDLQDLFDPSRNMAKYR  
NLLNSQNLQP-----PIIPL-FPVIKKDLTFL-----  
-----HEGND--SKV-----D---GLVNFE-KLRMIAKEI---RHV-----  
-----  
>Rapgef2\_[Sorex\_araneus]\_505792953  
STVEVATQLSMRNFELFRNIEPT----EYI-----DDLFK-L-KS----K-TSC-A----  
-----NLKKFEEVINQETFWVASEILRETNQLKRMKIIKHFIIKIA-  
LHCRE-CKNFNSMFIIISGLNLAPVARLRTTWEKLP NKYEKLFQDLQDLFDPSRNMAKYR  
NVLSNQNLQP-----PIIPL-FPVIKKDLTFL-----  
-----HEGND--SKV-----E---GLVNFE-KLRMIAKEI---RHVGRMASVNMDP--  
-----  
>Rapgef2\_[Strongylocentrotus\_purpuratus]\_780098595  
-SVEVAVQFSLRDYAI FEAIEPT----DYI-----EDLFN-L-KP----Q-GKK-DID--  
-----RLKAYEELVNLEMFVWVISEVVSEPSIMKRAKILKNFIKIA-  
RHFKD-CHNFNSLFAVISGLGHGSVSRRLRLAWDKVP SKYIKMFEDLQALLDPSRNMSKYR  
NLINAENVQP-----PLMPF-FPIVKKDLTFI-----  
-----HLGND--SYV-----E---GLINFE-KQRMVAREV---RYFHSMGNAPYDP--

```

-----
>Rapgef2_[Struthio_camelus_australis]_697489370
STVEVATQLSMRNFELFRNIEPT----EYI-----DDLFK-L-KS----K-TGC-T----
-----NLKKFEEVINQETFWVASEILRETNQLKRMKIIKHFIKIA-
LHCRE-CKNFNSMFAIISGLNLAPVARLRTTWEKLP SKYEKLFQDLQDLFDPSRNMAKYR
NVLNSQNLQP-----PIIPL-FPVIKKDLTFL-----
-----HEGND--SKV-----E---GLVNFE-KLRMIAKEI---RHVGRMASVNMDP--
-----

>Rapgef2_[Sturnus_vulgaris]_959071486
STVEVATQLSMRNFELFRNIEPT----EYI-----DDLFK-L-KS----K-TGC-T----
-----NLKRFEVINQETFWVASEILRETNQLKRMKIIKHFIKIA-
LHCRE-CKNFNSMFAIISGLNLAPVARLRTTWEKLP SKYEKLFQDLQDLFDPSRNMAKYR
NVLNSQNLQP-----PIIPL-FPVIKKDLTFL-----
-----HEGND--SKV-----E---GLVNFE-KLRMIAKEI---RHVGRMASVNMDP--
-----

>Rapgef2_[Sus_scrofa]_927167431
STVEVATQLSMRNFELFRNIEPT----EYI-----DDLFK-L-KS----K-TSC-A----
-----NLKKFEEVINQETFWVASEILRETNQLKRMKIIKHFIKIA-
LHCRE-CKNFNSMFAIISGLNLAPVARLRTTWEKLP NKYEKLFQDLQDLFDPSRNMAKYR
NVLNSQNLQP-----PIIPL-FPVIKKDLTFL-----
-----HEGND--SKV-----D---GLVNFE-KLRMIAKEI---RHVGRMASVNMDP--
-----

>Rapgef2_[Thamnophis_sirtalis]_927176022
STIEVATQLSMRNFELFRNIEPT----EYI-----DDLFK-L-KS----K-FNC-A----
-----NLKKFEEVINQETFWVASEILRETNQLKRMKIIKHFIKIA-
LHCRE-CKNFNSMFAIISGLNLAPVARLRTTWEKLP SKYEKLFQDLQDLFDPSRNMAKYR
NVLNSQNLQP-----PIIPL-FPVIKKDLTFL-----
-----HEGND--SKV-----E---GLVNFE-KLRMIAKEI---RHVGRMASVNMDP--
-----

>Rapgef2_[Tinamus_guttatus]_719747879
STVEVATQLSMRNFELFRNIEPT----EYI-----DDLFK-L-KS----K-TGC-T----
-----NLKKFEEVINQETFWVASEILRETNQLKRMKIIKHFIKIA-
LHCRE-CKNFNSMFAIISGLNLAPVARLRTTWEKLP SKYEKLFQDLQDLFDPSRNMAKYR
NVLNSQNLQP-----PIIPL-FPVIKKDLTFL-----
-----HEGND--SKV-----E---GLVNFE-KLRMIAKEI---RHVGRMASVNMDP--
-----

>Rapgef2_[Toxocara_canis]_734559244
-----NMS----KYR-----QHLSE-V-SD----E-----P----
-----PV-----EMWWVPNEVCRERSVQKRAKL VKKLIKVA-
RHCRD-FRNFSMFAIMSGLEKPAVRRLLHTWDRVP NKYVKMFEDMQQLVDPSRNMSKYR
QHLSEVSDEP-----PVVPI-YPVLKKDLTFC-----
-----HEGNP--TYC-----G---RLVNFE-KLRMIARAV---R-----
-----

>Rapgef2_[Trachymyrmex_septentrionalis]_1009425222
---EVAIQTLTLQDFSIFRQIEST---EYV-----DDLFE-L-KS----R-YGV-PM---
-----LSQFAELVNREMFVVTEVCSEHNLVRRS-----
-QCKE-CKNFNSMFAIVSGLGHGSVSRRLRASWEKLP TKYQRLFSDLQELMDPSRNMSKYR
QLVASEQTQP-----PIIPF-YPVVKDLTFI-----
-----HLGND--SRV-----E---SLVNFE-KLRMIAKEV---RTLTMCCSSPYD---
-----

>Rapgef2_[Tribolium_castaneum]_1008434452
---EVAIQTLTLQDFSIFRQIEST---EYI-----DELFE-L-KS----K-YGT-PM---
-----LEQFAALVNKEMFWVTEVCSEHNPVRRMKIIKQFIKVAS
KQCKE-CKNFNSMFAIISGXGHGAVSRLRQSWDKLP GKYQRVFSDLQQLMDPSRNMSKYR

```



```

QLVSAEQSQP-----PIIPF-YPVVKKDLTFI-----
-----HLGND--SQV-----E---GLVNFE-KLRMIAKEV---RSLSNMCSSPYD---
-----
>Rapgef2_[Trichechus_manatus_latirostris]_471397362
STVEVATQLSMRNFELFRNIEPT----EYI-----DDLFF-L-KS----K-TSC-A----
-----NLKKFEEVINQETFWVASEILREPNQLKRMKIIKHFIKIA-
LHCRE-CKNFSSMFAIISGLNLAPVARLRTTWEKLPNKYEKLFQDLQDLFDPSRNMAKYR
NVLNSQNLQP-----PIIPL-FPVIKKDLTFL-----
-----HEGND--SKV-----D---GLVNFE-KLRMIAKEI---RHVGRMASVNMDP---
-----
>Rapgef2_[Trichogramma_pretiosum]_936679530
-AGEVAIQTLTLDYSIFRQIEST----EYV-----DDLFE-L-KS----K-YGT-PM---
-----LRQFAELVNREMFVVTEVCSEHNVVRRSKIIKQFIKIA-
RQCKE-CKNFNSMFAIISGLGHGAVSRLRSSWEKLP SKYQRLFSDLQELMDPSRNMSKYR
QLVASEQTQPA-----PIIPF-YPVVKKDLTFI-----
-----HLGND--SEV-----E---GLVNFE-KLRMIAKEV---RNL-----
-----
>Rapgef2_[Tupaia_chinensis]_562872629
STVEVATQLSMRNFELFRNIEPT----EYI-----DDLFR-L-RS----K-GSG-A----
-----NLKRFEDVINQETFWVASEILRETNQLKRTKIVKHFIKIA-
LHCRE-CKNFNSMFAVISGLNLAPVARLRTTWEKLPNKYEKLFQDLQDLFDPSRNMAKYR
NVLSSQSLQP-----PIIPL-FPVIKKDLTFL-----
-----HEGND--SKV-----D---GLVNFE-KLRMIAKEI---RHVGRMASVNMDP---
-----
>Rapgef2_[Tursiops_truncatus]_470634065
STVEVATQLSMRNFELFRNIEPT----EYI-----DDLFF-L-RS----K-TSC-A----
-----NLKKFEEVINQETFWVASEILRETNQLKRMKTIKHFIKIA-
LHCRE-CKNFNSMFAIISGLNLAPVARLRTTWEKLPNKYEKLFQDLQDLFDPSRNMAKYR
NVLNSQNLQP-----PIIPL-FPVIKKDLTFL-----
-----HEGND--SKV-----D---GLVNFE-KLRMIAKEI---RHVGRMASVNMDP---
-----
>Rapgef2_[Tyto_alba]_701382803
STVEVATQLSMRNFELFRNIEPT----EYI-----DDLFF-L-KS----K-TGC-T----
-----NLKKFEEVINQETFWVASEILRETNQLKRMKIIKHFIKIA-
LHCRE-CKNFNSMFAIISGLNLAPVARLRTTWEKLP SKYEKLFQDLQDLFDPSRNMAKYR
NVLNSQNLQP-----PIIPL-FPVIKKDLTFL-----
-----HEGND--SKV-----E---GLVNFE-KLRMIAKEI---RHVGRMASVNMDP---
-----
>Rapgef2_[Ursus_maritimus]_670985378
STVEVATQLSMRNFELFRNIEPT----EYI-----DDLFF-L-KS----K-TSC-A----
-----NLKKFEEVINQETFWVASEILRETNQLKRMKIIKHFIKIA-
LHCRE-CKNFNSMFAIISGLNLAPVARLRTTWEKLPNKYEKLFQDLQDLFDPSRNMAKYR
NVLNSQNLQP-----PIIPL-FPVIKKDLTFL-----
-----HEGND--SKV-----D---GLVNFE-KLRMIAKEI---RHVGRMASVNMDP---
-----
>Rapgef2_[Vicugna_pacos]_970736793
STVEVATQLSMRNFELFRNIEPT----EYI-----DDLFF-L-RS----K-TSC-A----
-----NLKKFEEVINQETFWVASEILRETNQLKRMKIIKHFIKIA-
LHCRE-CKNFNSMFAIISGLNLAPVARLRTTWEKLPNKYEKLFQDLQDLFDPSRNMAKYR
NVLNSQNLQP-----PIIPL-FPVIKKDLTFL-----
-----HEGND--SKV-----E---GLVNFE-KLRMIAKEI---RHVGRMASVNMDP---
-----
>Rapgef2_[Vollenhovia_emeryi]_795102055
---EVAIQTLTLDYSIFRQIEST----EYV-----DDLFE-L-KS----R-YGV-PM---

```

-----LSQFAELVNREMFWVTEVCSEHNLVRRSKI IKQFIKIA-  
RQCKE-CKNFNSMFAIVSGLGHGSVRLRASWEKLPTKYQRLFSDLQELMDPSRNMSKYR  
QLVASEQTQP-----PIIPF-YPVVKKDLTFI-----  
-----HLGND--SRV-----E---SLVNFE-KLRMIAKEV---RTLTMCCSSPYD---

>Rapgef2\_[Xenopus\_laevis]\_147907136

STIEVATQLSMRNFELFRNIEPT----EYI-----DDLFK-L-KM----K-SGC-A----  
-----NLKNFEEVINQETFWVASEILRETNQLKRMKIIKHFIKIA-  
LHCRE-CKNFNSMFAIISGLNLAPVSRRLRATWEKLPSKYEKLFQDLQDLFDPSRNMAKYR  
NVLNSQNLQP-----PIIPL-FPVIKKDLTFL-----  
-----HEGND--SKV-----D---GLVNFE-KLRMIAKEI---RHVGRMASVNMDP---

>Rapgef2\_[Xenopus\_tropicalis]\_847085554

STIEVATQLSMRNFELFRNIEPT----EYI-----DDLFK-L-KM----K-TGC-T----  
-----NLKNFEEVINQETFWVASEILRETNQLKRMKIIKHFIKIA-  
LHCRE-CKNFNSMFAIISGLNLAPVSRRLRTTWEKLPSKYEKLFQDLQDLFDPSRNMAKYR  
NVLNSQNLQP-----PIIPL-FPVIKKDLTFL-----  
-----HEGND--SKV-----D---GLVNFE-KLRMIAKEI---RHVGRMASVNMDP---

>Rapgef2\_[Zonotrichia\_albicollis]\_542155070

STVEVATQLSMRNFELFRNIEPT----EYI-----DDLFK-L-KS----K-TGC-T----  
-----NLKRFEVINQETFWVASEILRETNQLKRMKIIKHFIKIA-  
LHCRE-CKNFNSMFAIISGLNLAPVARLRTTWEKLPSKYEKLFQDLQDLFDPSRNMAKYR  
NVLNSQNLQP-----PIIPL-FPVIKKDLTFL-----  
-----HEGND--SKV-----E---GLVNFE-KLRMIAKEI---RHVGRMASVNMDP---

>Rapgef2\_[Zootermopsis\_nevadensis]\_646721548

---EVAIQTLTLQDFSIFRQIEST----EYV-----DDLFE-L-KS----R-YGV-PM---  
-----LSQFAELVNREMFWVTEVCSEHNLVRRSKI IKQFIKVA-  
RQCKE-CKNFNSMFAIVSGLGHGAVSRLRLSWEKLPSKYQRLFSDLQDLMDPSRNMSKYR  
QLVSSEQSQP-----PIIPF-YPVVKKDLTFI-----  
-----HLGND--SKI-----E---GLINFE-KLRMIAKEV---RALTMCCSSPYD---

>Rapgef3\_[Acinonyx\_jubatus]\_961722103

SAKDLAQLTDHWDNLFNSIHQV----ELI-----HYVLG-PQHL----R--DV-TTA--  
-----NLERFMRRFNELQYWVATELCLCPVPGLRAQLLRKFIKLA-  
AHLKE-QKNLNSFFAVMFGLSNSAISRLAHTWERLPHKVRKLYSALERLLDPSWNHRVYR  
LALTK--LSP-----PIIPF-MPLLLKDMTFI-----  
-----HEGNH--TLV-----E---NLINFE-KMRMMARAV---RMLHHC-----

>Rapgef3\_[Ailuropoda\_melanoleuca]\_752406281

SAKDLAQLTDHWDNLFNSIHQV----ELI-----HYVLG-PQHL----R--DV-TTA--  
-----NLERLMRRFNELQYWVATELCLCPVPGLRAQLLRKFIKLA-  
AHLKE-QKNLNSFFAVMFGLSNSAVSRLAHTWERLPHKVRKLYAALERLLDPSWNHRVYR  
LALTK--LSP-----PIIPF-MPLLLKDMTFI-----  
-----HEGNH--TLV-----E---NLINFE-KMPLPHSLVCGEDSLHYVTWQAEFPRV  
SSALSPPRSFLFFLPPPDAPPVPLSPLRSRVSHLHEDSQAAR----TST---CSEQS

>Rapgef3\_[Alligator\_mississippiensis]\_950944900

SSKDLASQLTDHWDTLFSSVHQV----ELL-----YHVLG-PQKF----P--GA-TTA--  
-----NLERIMRRFNELQYWVSTELCLCGDVARRAQLLRKFIKLA-  
AHLKE-QKNLNSFFAVMFGLSNTAVSRLAKTWERLPHKVRKLHAVLERMLDPSWNHRVYR  
LAVAK--LSP-----PIFPF-LPLLLKDLTFI-----  
-----HEGNR--TLS-----E---NLINFE-KMRMMAKAV---RILHRCRSHF-----  
-----HTPVSPLSRSRSPHRLDPKALR----ASTSDFCSK--

>Rapgef3\_[Alligator\_sinensis]\_944358354  
SSKDLASQLTEHDWTLFSSVHQV----ELL-----YHVLG-PQKF----P--GA-TTA--  
-----NLERIMRRFNEQLQYWVSTELCLCGDVARRAQLLRKFIKLA-  
AHLKE-QKNLNSFFAVMFGLSNTAVSRLAKTWEKLPKVRKLHAVLERMLDPSWNHRVYR  
LAVAK--LSP-----PIFPF-LPLLLKDLTFI-----  
-----HEGNR--TMS-----E---NLINFE-KMRMMAKAV---RILHRCRSHV-----  
-----HTPVSPLSRSPHRLEDPKALR----AST---CSEQS

>Rapgef3\_[Anolis\_carolinensis]\_327279590  
SSKDLANQLTEHDWNLFKSIHQV----ELV-----YYIFG-PQKF----P--NA-TTA--  
-----NLERFLRRFNEQLQFWVTTELCLCPDVIKRAQLLRKFIKMA-  
AHLKD-QKNLNTFFAVMFGLSHSAVSRLSKTWEKLPKTRKLFNTMERMLDPSWNHRIYR  
LAMAK--LTP-----PMIPF-MPLLLKDMTFI-----  
-----HEGNR--TSV-----E---NLVNFE-KLHMMAKAV---HLVHHCRSLP-----  
-----NLPLSPLRSRPQHLLEEARAMR----AST---CSEQS

>Rapgef3\_[Anser\_cygnoides\_domesticus]\_902933497  
SSKDLASHLTDYDWNLFKSIHQV----EMI-----HYIVG-PQKF----H--EV-TTA--  
-----NLERVMRRFNEQLQYWVATELCLCPEVGRRRAQLLRKFIKLA-  
AHLKE-QKNLNSFFAVMFGVSNTAVSRLAKTWERLPHKIRKLHAALERMLDPSWNHRVYR  
LAVAK--LSP-----PIIPF-VPLLLK-----  
-----

>Rapgef3\_[Aptenodytes\_forsteri]\_686593488  
SSKDLASHLTDYDWNLFKSIHQV----EMI-----HYIVG-PQKF----H--DV-TTA--  
-----NLERVMRRFNEQLQYWVATELCLCPEVGRRRAQLLRKFIKLA-  
AHLKE-QKNLNSFFAVMFGVSNTAVSRLAKTWERLPHKIRKLHSALERMLDPSWNHRVYR  
LAVAK--LSP-----PIIPF-VPLLLKDMTFI-----  
-----HEGNR--TLA-----E---NLINFE-KMHMAKTV---RVLQRCRGDA-----  
-----HAPLSPLRNRSPHRPEDPKAVR----IST---CSEQS

>Rapgef3\_[Apteryx\_australis\_mantelli]\_926500193  
SSKDLASHLTDYDWNLFKSIHQV----EMI-----HYIIR-PQKF----H--DV-TTA--  
-----NLERVMRRFNEQLQYWVATELCLCSEVGRRRAQLLRKFIKLA-  
AHLKE-QKNLNSFFAVMFGVSNTAVSRLAKTWERLPHKIRKLHSALERMLDPSWNHRVYR  
LAVAK--LSP-----PIIPF-VPLLLKDMTFI-----  
-----HEGNR--TLA-----E---NLINFE-KMHMAKTV---RVLQRCRGHA-----  
-----HAPVSPLRSRSPHRLEDPKAVR----IST---CSEQS

>Rapgef3\_[Aquila\_chrysaetos\_canadensis]\_768403048  
SSKDLASHLTDYDWNLFKSIHQV----EMI-----HYIVG-PQKF----H--DV-TTA--  
-----NLERVMRRFNEQLQYWVATELCLCPEVGRRRAQLLRKFIKLA-  
AHLKE-QKNLNSFFAVMFGVSNTAVSRLAKTWERLPHKIRKLHSALERMLDPSWNHRVYR  
LAVAK--LSP-----PIIPF-VPLLLKDMTFI-----  
-----HEGNR--TLA-----E---NLINFE-KM-----

>Rapgef3\_[Austrofundulus\_limnaeus]\_928045560  
SSKDIGIELTNYDWELFTAMHEV----ELV-----YYIFG-RHKF----P--GA-ITA--  
-----NLERFVRHFNEVQYWVATELCLCEDLVKRAVLLKKFIKIA-  
SVLKD-QKNLNLFFAVMFGLSNSAVQRLYKTWERIPSKTKRIYCTYERLMDPSRNHRAYR  
LAVTK--LSP-----PYIPF-MPLLLKDMTFI-----  
-----HEGNP--NCL-----D---KLVNFE-KMRMLAKTV---KIVRGCRSQP-----  
-----Y-VPSSPQRGLADRIFLEGP-TR----LSTS---SE--

>Rapgef3\_[Balaenoptera\_acutorostrata\_scammoni]\_594662221  
STKDLAQLTDHDSLNFNSIHQV----ELI-----HYVLG-PQPL----R--DV-TTA--  
-----NLERFMRRFNEQLQYWVATELCLCPVGLRAQLLRKFIKLA-  
AHLKE-QKNLNSFFAIMFGLSNSAISRLAQTWERLPHKVRKLYSALERLLDPSWNHRVYR  
LALTK--LSP-----PLIPF-MPLLLKDMTFI-----

-----HEGNH--TLV-----E---NLINFE-KMRMMARAA---RMLHHCRSHS-----  
-----SVPLSPLRSRVSHLHEDSQATR-----ISM---CSEQS  
>Rapgef3\_[Bison\_bison\_bison]\_742108280  
STKDLAGQLTDHDWSLFNSIHQV----ELI-----HYVLG-PQHL----R--DV-TTA--  
-----NLERFMRRFNELOQYWVATELCLCSVPGLRAQLLRKFIKLA-  
AHLKE-QKNLNSFFAIMFGLSNSAISRLAHTWERLPHKVRKLYSALERLLDPSWNHRVYR  
LALTK--LSP-----PLIPF-MPLLLKDMTFI-----  
-----HEGNH--TLV-----E---NLINFE-KMRMMARAA---RMLHHCRSHS-----  
-----NVPLSPLRSRVSHLHEDSQAVR-----VST---CSEQS  
>Rapgef3\_[Bos\_mutus]\_555987329  
STKDLAGQLTDHDWSLFNSIHQV----ELI-----HYVLG-PQHL----R--DV-TTA--  
-----NLERFMRRFNELOQYWVATELCLCSVPGLRAQLLRKFIKLA-  
AHLKE-QKNLNSFFAIMFGLSNSAISRLAHTWERLPHKVRKLYSALERLLDPSWNHRVYR  
LALTK--LSP-----PLIPF-MPLLLKDMTFI-----  
-----HEGNH--TLV-----E---NLINFE-KMRMMARAA---RMLHHCRSHS-----  
-----NVPLSPLRSRVSHLHEDSQAVR-----VST---CSEQS  
>Rapgef3\_[Bos\_taurus]\_528949062  
STKDLAGQLTDHDWSLFNSIHQV----ELI-----HYVLG-PQHL----R--DV-TTA--  
-----NLERFMRRFNELOQYWVATELCLCSVPGLRAQLLRKFIKLA-  
AHLKE-QKNLNSFFAIMFGLSNSAISRLAHTWERLPHKVRKLYSALERLLDPSWNHRVYR  
LALTK--LSP-----PLIPF-MPLLLKDMTFI-----  
-----HEGNH--TLV-----E---NLINFE-KMRMMARAA---RMLHHCRSHS-----  
-----NVPLSPLRSRVSHLHEDSQAVR-----VST---CSEQS  
>Rapgef3\_[Bubalus\_bubalis]\_594071307  
STKDLAGQLTDHDWSLFNSIHQV----ELI-----HYVLG-PQHL----R--DV-TTA--  
-----NLERFMRRFNELOQYWVATELCLCSVPGLRAQLLRKFIKLA-  
AHLKE-QKNLNSFFAVMFGLSNSAISRLAHTWERLPHKVRKLYSALERLLDPSWNHRVYR  
LALTK--LSP-----PLIPF-MPLLLKDVTFI-----  
-----HEGNH--TLV-----E---NLINFE-KMRMMARAA---RMLHHCRSHS-----  
-----NVPLSPLRSRVSHLHEDSQAVR-----VST---CSEQS  
>Rapgef3\_[Caenorhabditis\_briggsae]\_268573060  
-----ELL-----YQVIG-RESF--PQS-----MPF--  
-----NLDLLVRRFNEVQHWSTTEILLA-TEDNRVEILKKFIHIA-  
TIARE-YRDLLTVFAITLGLSHTSVSRLTLTWNKLPPATFKTFSELENLLDPTRNHRMYR  
LLVSK--IAT-----PYIPF-VPLILKDLMTFI-----  
-----HQGNK--SFY-----N---GLVNFE-KMHMFAKIF---RNFRQCKS--HMNDT  
TDHQ-----YVEPQSLIRN-LRVIDNQKILIQLSYG---IEPK  
>Rapgef3\_[Caenorhabditis\_remanei]\_308501823  
-----ELL-----YQVIG-RESF--PLS-----MPF--  
-----NLDLLVRRFNEVQHWSTTEILLA-SEENRVEILKKFIAIA-  
TIARE-YRDLLTVFAITLGLSHTSVSRLTLTWSKLPPITLKTFSLEHLLDPTRNHRMYR  
LMVSK--MAS-----PYIPF-VPLILKDLMTFI-----  
-----HQGNK--SFY-----N---GLVNFE-KMHMFAKIF---RNFRQCKS--QMND  
SDHE-----YVEPQSLIRN-LRVIDNQKKLMQISYE---IEPK  
>Rapgef3\_[Callithrix\_jacchus]\_675676220  
SAKDLAGQLTDQDWSLFNSVHQV----ELI-----HYVLG-PQHL----R--DV-TTA--  
-----NLERFMRRFNQLQYWVATELCLCVAPGPRAQLLRKFIKLA-  
AHLKE-QKNLNSFFAVMFGLSNSAISRLAHTWERLPHKVRKLYSALERLLDPSWNHRVYR  
LALAK--LSP-----PVIPIF-MPLLLKDMTFI-----  
-----HEGNH--TLV-----E---NLINFE-KMRMMARAS---RMLHHCRSHN-----  
-----PVPLSPLRSRVSHLHEDSQVAR-----IST---CSEQS  
>Rapgef3\_[Callorhinchus\_milii]\_632985555  
-----  
-----

```

-----MNSFFAVAFGLSNSAVSRLSKTWEGLTNKTRRVYQSFERLMDPSRNHRAYR
MVAGK--LSL-----PFLPF-MPLLIKDLTFI-----
-----EEGNK--TFV-----N---NLVNFE-KMRMIARTV---NLFRRCRTHSQMIPQ
KMEPEISSAQISTTSDQS-----
>Rapgef3_[Camelus_dromedarius]_744616231
STKDLAGQLTDHDWNLFNSIHQV----ELI-----HYVLG-PQHL----R--DV-TTA--
-----NLERFMRRFNELQYWVATELCLCPVPGLRAQLLRKFIKLA-
AHLKE-QKNLNSFFAIMFGLSNSAISRLAHTWERLPHKVRKLYSALERLLDPSWNHRVYR
LALTK--LSP-----PVIPIF-MPLLLKDMTFI-----
-----HEGNH--TLV-----E---NLINFE-KMRMMARAA---RMLHHCRSHS-----
-----NVPLSPLRSRVSHLHEDSQATR-----IST---CSEQS
>Rapgef3_[Canis_lupus_familiaris]_153791885
SAKDLAGQLTDHDWNLFNSIHQV----ELI-----HYVLG-PQHL----R--DV-TTA--
-----NLERFMRRFNELQYWVATELCLCPVPGLRAQLLRKFIKLA-
AHLKE-QKNLNSFFAVMFGLSNSAISRLAHTWERLPHKVRKLYSALERLLDPSWNHRVYR
LALTK--LSP-----PIPIF-MPLLLKDMTFI-----
-----HEGNH--TLV-----E---NLINFE-KMRMMARAV---RMLHHCRSHS-----
-----NVPLSPLRSRVSHLHEDSQAAR-----TST---CSEQS
>Rapgef3_[Capra_hircus]_926691591
STKDLAGQLTDHDWSLFNSIHQV----ELI-----HYVLG-PQHL----R--DV-TTA--
-----NLERFMRRFNELQYWVATELCLCSVPGLRAQLLRKFIKLA-
AHLKE-QKNLNSFFAVMFGLSNSAISRLAHTWERLPHKVRKLYSALERLLDPSWNHRVYR
LALTK--LSP-----PLIPIF-MPLLLKDMTFI-----
-----HEGNH--TLV-----E---NLINFE-KMRMMARAA---RMLHHCRSHS-----
-----NVPLSPLRSRVSHLHEDSQAVR-----VST---CSEQS
>Rapgef3_[Carlito_syrichta]_640792033
SAKDLAGQLTDHDWSLFNSIHQV----ELI-----HYVLG-PQHL----R--DV-TTA--
-----NLERFMRRFNELQYWVATELCLCPVPGPRVQLLRKFIKLA-
AHLKE-QKNLNSFFAIMFGLSNSAISRLAHTWERLPHKVRKLYSALERLLDPSWNHRVYR
LALAK--LSP-----PVIPIF-MPLLLKDMTFI-----
-----HEGNH--TLV-----E---NLINFE-KMRMMARAV---RMLHHCRGHS-----
-----TVPLSPLRSRVSHLHEDSQAAR-----IST---CSEQS
>Rapgef3_[Cavia_porcellus]_348580717
SAKDLAGQLTDHDWSLFNSIHQV----ELI-----HYVLG-PQHL----R--DV-TTA--
-----NLERFMRRFNELQYWVATELCLCSVPGLRAQLLRKFIKLA-
AHLKE-QKNLNSFFAIMFGLSNSAISRLAHTWERLPHKVRKLYSALERLLDPSWNHRVYR
LALTK--LSP-----PIPIF-MPLLLKDMTFI-----
-----HEGNH--TLV-----E---NLINFE-KMRMMARAA---RLLHHCRNHS-----
-----TVPLSPLRSRVSHLHEDSQASR-----IST---CSEQS
>Rapgef3_[Cebus_capucinus_imitator]_1044333204
SAKDLAGQLTDHDWSLFNSIHQV----ELI-----HYVLG-PQHL----R--DI-TTA--
-----NLERFMRRFNELQYWVATELCLCAVPGPRAQLLRKFIKLA-
AHLKE-QKNLNSFFAIMFGLSNSAISRLAHTWERLPHKVRKLYSALERLLDPSWNHRVYR
LALAK--LSP-----PVIPIF-MPLLLKDMTFI-----
-----HEGNH--TLV-----E---NLINFE-KMRMMARAA---RMLHHCRSHN-----
-----PVPLSPLRSRVSHLHEDSQVAR-----IST---CSEQS
>Rapgef3_[Ceratotherium_simum_simum]_478509423
SAKDLAGQLTDHDWSLFNSIHQV----ELI-----HYVLG-PQHL----R--DV-TTA--
-----NLERFMRRFNELQYWVATELCLCPVPGPRAQLLRKFIKLA-
AHLKE-QKNLNSFFAVMFGLSNSAISRLAHTWERLPHKVRKLHSALERLLDPSWNHRVYR
LALTK--LSP-----PIPIF-MPLLLKDMTFI-----
-----HEGNH--TLV-----E---NLINFE-KMRMMARAV---RMLHHCRSHS-----
-----SVPLSPLRSRVSHLHEDGQAAR-----IST---CSEQS
>Rapgef3_[Cercopithecus_atys]_795538404

```

SAKDLAGQLTDHDWSLFNSIHQV----ELI-----YYALG-PQHL----R--DV-TTA--  
 -----NLERFMRRFNEQLQYWVATELCLCPVPGPRAQLLRKFIKLA-  
 AHLKE-QKNLNSFFAVMFGLSNSAISRLAHTWERLPHKVRKLYSALERLLDPSWNHRVYR  
 LALAK--LSP-----PVIPIF-MPLLLKDMTFI-----  
 -----HEGNH--TLV-----E---NLINFE-KMRMMARAA---RMLHHCRSHN-----  
 -----PVPLSPLRSRVSHLHEDSQVAR----IST---CSEQS  
 >Rapgef3\_[Charadrius\_vociferus]\_699656507  
 SSKDLASHLTDYDWNLFKSIHQV----EMI-----HYIVG-PQKF----H--DV-TTA--  
 -----NLERVMRRFNEQLQYWVATELCLCPEVGRRRAQLLRKFIKLA-  
 AHLKE-QKNLNSFFAVMFVSNLAVSRSLAHTWERLPHKIRKLHSALERMLDPSWNHRVYR  
 LAVAK--LSP-----PIPIF-VPLLLKDMTFI-----  
 -----HEGNR--TLA-----E---NLINFE-KMHMMAKTV---RVLQRCRGHA-----  
 -----HAPLSPLRNRSRPHRPEDPKAIR----IST---CSEQS  
 >Rapgef3\_[Chelonia\_mydas]\_465956413  
 SSKDLASQLTDYDWNLFSSVHQV----ELI-----YYTFG-QQTF----P--SA-TTA--  
 -----NLERVMRRFNEQLQYWIATELCLCAEPGKRAQLLRKFIKLA-  
 AHLKE-QKNLNSFFAVMFGLSNTSVSRSLAHTWERLPHKTRKLHSALERMLDPSWNHRVYR  
 LAIAK--LTP-----PIPIF-MPLLLKDMTFI-----  
 -----HEGNR--TLA-----E---NLINFE-KMRMMAKAV---RIIHHSQSHT-----  
 -----YGPISPLRSRPPQLLEDQPALR----IST---CSEQS  
 >Rapgef3\_[Chinchilla\_lanigera]\_533187398  
 SARDLAGQLTDLDWSLFNSIHQV----ELI-----HYVLG-PQRL----R--DG-TTA--  
 -----NLERFMRRFNEQLQFWVATELCLCPAPGLRAQLLRKFIKLA-  
 AHLKE-QKNLNSFFAIMFGLSNSAISRLAHTWERLPHKVRKLYSALERLLDPSWNHRVYR  
 LALSK--LSP-----PLIPF-MPLLLKDMTFI-----  
 -----HEGNR--TLV-----E---NLINFE-KMRMMARAA---RLLHRCRSHG-----  
 -----AVPLSPLRSRVSHLHEDSQASR----VST---CSEQS  
 >Rapgef3\_[Chlorocebus\_sabaeus]\_635064868  
 SAKDLAGQLTDHDWSLFNSIHQV----ELI-----YYALG-PQHL----R--DV-TTA--  
 -----NLERFMRRFNEQLQYWVATELCLCPVPGPRAQLLRKFIKLA-  
 AHLKE-QKNLNSFFAVMFGLSNSAISRLAHTWERLPHKVRKLYSALERLLDPSWNHRVYR  
 LALAK--LSP-----PIPIF-MPLLLKDMTFI-----  
 -----HEGNH--TLV-----E---NLINFE-KMRMMARAA---RMLHHCRSHN-----  
 -----PVPLSPLRSRVSHLHEDSQVAR----IST---CSEQS  
 >Rapgef3\_[Chrysochloris\_asiatica]\_586469584  
 SAKDLAGQLTDHDWNLFHSIHQV----ELI-----HYVLG-PQHL----R--TV-TTA--  
 -----NLERFLRRFNEQLQYWVATELCLCPVPSLRAQLLRKFIKLA-  
 AHLKE-QKNLNSFFAIMFGLSNSAISRLAHTWERLPHKVRKLYSALERLLDPSWNHRVYR  
 LALTK--LSP-----PIPIF-MPLLLKDMTFI-----  
 -----HEGNH--TLV-----E---NLINFE-KMRMMARAV---RMLHQCRSHS-----  
 -----NVPLSPLRSRVSHLHEDSQAVR----IST---CSEQS  
 >Rapgef3\_[Clupea\_harengus]\_831315562  
 GSKDIASQLTNYDWELFTAMHET----ELL-----YYVFG-REKF----P--HT-TTA--  
 -----NLERFMRRFNEVQYWVATELCLCVDLAKRAALLKKFIKMA-  
 IVLKE-QKNLNSFYAVMFGLTNSAVTRLYKTWERVPNKTRRIFTTYERILDPARNHRAYR  
 LAVVK--LSP-----PYIPF-MPLILKDMTFI-----  
 -----HEGNK--NYT-----N---TLVNFE-KMRMIARTL---KIVTGCRNQS-----  
 -----YSVPSSPQKGMTERMFLFETPAIR----LSTY---SEQS  
 >Rapgef3\_[Colobus\_angolensis\_palliatus]\_795136375  
 SAKDLAGQLTDHDWSLFNSIHQV----ELI-----YYALG-PQHL----R--DV-TTA--  
 -----NLERFMRRFNEQLQYWVATELCLCPVPGPRAQLLRKFIKLA-  
 AHLKE-QKNLNSFFAVMFGLSNSAISRLAHTWERLPHKVRKLYSALERLLDPSWNHRVYR  
 LALAK--LSP-----PVIPIF-MPLLLKDMTFI-----  
 -----HEGNH--TLV-----E---NLINFE-KMRMMARAA---RMLHHCRSHN-----

```

-----PVPLSPLRSRVSHLHEDSQVAR-----IST---CSEQS
>Rapgef3_[Columba_livia]_915562087
SSKDLASHLTDYDWNLFKSIHQV----EMI-----HYIVG-PQKF----H--EV-TTA--
-----NLERVMRRX--QYWVATELCLCPEVGRRRAQLLRKFIKLA-
AHLKE-QKNLNSFFAVMFGVSNTAVSRLARTWERLPHKIRKLHSALERMLDPSWNHRVYR
LAVAK--LSP-----PIIPF-MPLLLKDMTFI-----
-----HEGNR--TMA-----E---NLINFE-KMHMMAKTL---RVLQRCRGQA-----
-----HAPLSPLRSRSPHRPEDPKSVR-----IST---CSEQS
>Rapgef3_[Coturnix_japonica]_1003995665
SSKDLASHLTDYDWNLFKSIHQV----EMI-----HYIVG-PQKF----H--EV-TTA--
-----NLERMMRRFNEQLQYWVATELCLCNELGRRRAQLLRKFIKLA-
AHLKE-QKNLNSFFAVMFGVSNTAVSRLAKTWERLPHKIRKLHSALERMLDPSWNHRVYR
LAVAK--LSP-----PIIPF-IPLLLKDMTFI-----
-----HEGNR--TLA-----E---NLINFE-KMHMMAKTV---RILQRCRGQA-----
-----HAPLSPLRTRSPHRPEDARAVR-----IST---CSEQS
>Rapgef3_[Cricetulus_griseus]_625224026
SAKDLAQQLTDHWDWNLFNRIHQV----ELI-----HYVLG-PQHL----R--DV-TTA--
-----NLERFMRRFNEQLQYWVATELCLCSVPGPRAQLLRKFIKLA-
AHLKE-QKNLNSFFAVMFGLSNSAISRLAHTWERLPHKVRKLYSALERLLDPSWNHRVYR
LALTK--LSP-----PVIPL-MPLLLKDMTFI-----
-----HEGNH--TLV-----E---NLINFE-KMRMMARAV---RMLHHCRSHN-----
-----TVPLSPLRSRVSHIHEDSQASR-----IST---CSEQS
>Rapgef3_[Cynoglossus_semilaevis]_657766970
SSKDLAYELTNYDWELFTAVHEV----ELV-----YYIFG-RQKF----H--GA-TTA--
-----NLERFVRRFNEVQYWVLTEVCLCEDVVKRASLLKKFIKIA-
AVLKE-QKNLNSFFAVMFALSNSAVQRLYKTWERIPSKTKRIYCAYERLMDPSRNHRAYR
LTVAK--LSP-----PYIPL-MPLLLKDMTFI-----
-----HEGNS--NYV-----E---KLVNFE-KMRMMAKTV---KIVRGCRSQP-----
-----Y-VPSSPQRGLADRMFLDGPANR----LSTY---SD--
>Rapgef3_[Danio_rerio]_688612298
-SKDMASQHTSYDWELFMAMHEV----ELV-----YYVFG-REKF----P--GS-TTA--
-----NLERFVRRFNEVQYWVTELCCLCEDLGKRAILLKKFIKMA-
VVLKE-QKNLNSFFAVMFGLSNSAVQRLNKTWERLPNKTKRIYCAYERLMDPSRNHRAYR
LTIK--LSP-----PYIPF-MPLLLKDMTFI-----
-----HEGNK--NYT-----D---KLVNFE-KMRMIARTV---KTVRDCRSQ-----
-----
>Rapgef3_[Dasypus_novemcinctus]_488561334
SAKDLAQQLTEHDWTLFNSIQV----ELI-----HFVLG-PQHL----R--DV-TTA--
-----NLERFMRRFNEQLQYWVATELCLCPVPGPRAQLLRKFIKLA-
AHLKE-QKNLNSFFAVMFGLSNSAISRLAHTWERLPHKVRKLYSALERLLDPSWNHRVYR
LALAK--LSP-----PVIPL-MPLLLKDMTFI-----
-----HEGNH--TLV-----E---NLINFE-KMRMMARAM---RMLHHCRNHS-----
-----
>Rapgef3_[Echinops_telfairi]_850308220
-----
-----
-----LDPSWNHRVYR
LALTK--LSP-----PIIPF-MPLLLKDMTFI-----
-----HEGNH--TLV-----E---NLVNFE-KMRMMARAV---RLLHHCRSHGNVPLS
PLRSRASQLHEDSQAMRVSTCSEQS-----
>Rapgef3_[Egretta_garzetta]_697847879
SSKDLASHLTDYDWNLFKSIHQV----EMI-----HYIVG-PQKF----H--DV-TTA--
-----NLERVMRRFNEQLQYWVATELCLCPEVGRRRAQLLRKFIKLA-
AHLKE-QKNLNSFFAVMFGVSNTAVSRLAKTWE-----DPSWNHRVYR

```

```

LAVAK--LSP-----PIIPF-VPLLLKDMTFI-----
-----HEGNR--TLA-----E---NLINFE-KMVSGAGRL---PVDTSF-----
-----
>Rapgef3_[Eptesicus_fuscus]_641700539
SAKDLAVQLTDHDWNLFNSIHQV----ELI-----HYVLG-PQHL----R--DV-TTA--
-----NLERFMRRFNEQLQYWVATELCLCPVPGPRAQLLRKFIKLA-
AHLKE-QKNLNSFFAVMFGLSNSAISRLAHTWERLPHKVRKLYSALERLLDPSWNHRVYR
LALTK--LSP-----PVIPF-MPLLLKDMTFI-----
-----HEGNH--TLV-----E---NLINFE-KMRMMARAV---RMLHHCRSHS-----
-----NVPLSPLRSRVSHLHEDSQAAR----VST---CSEQS
>Rapgef3_[Equus_asinus]_958727868
SAKDLAGQLTDHDWNLFNSIHQV----ELI-----HYVLG-PQHL----R--DV-TTA--
-----NLERFMRRFNEQLQYWVATELCLCPVPGPRAQLLRKFIKLA-
AHLKE-QKNLNSFFAVMFGLSNSAISRLAHTWERLPHKVRKLYSALERLLDPSWNHRVYR
LALTK--LSP-----PVIPF-MPLLLKDMTFI-----
-----HEGNH--TLV-----E---NLINFE-KMRMMARAV---RMLHHCRSHS-----
-----SVPLSPLRSRVSHFHEDGQAAR----IST---CSEQS
>Rapgef3_[Equus_caballus]_545219817
SAKDLAGQLTDHDWNLFNSIHQV----ELI-----HYVLG-PQHL----R--DV-TTA--
-----NLERFMRRFNEQLQYWVATELCLCPVPGPRAQLLRKFIKLA-
AHLKE-QKNLNSFFAVMFGLSNSAISRLAHTWERLPHKVRKLYSALERLLDPSWNHRVYR
LALTK--LSP-----PVIPF-MPLLLKDMTFI-----
-----HEGNH--TLV-----E---NLINFE-KMRMMARAV---RMLHHCRSHS-----
-----SVPLSPLRSRVSHFHEDGQAAR----IST---CSEQS
>Rapgef3_[Equus_przewalskii]_664709775
SAKDLAGQLTDHDWNLFNSIHQV----ELI-----HYVLG-PQHL----R--DV-TTA--
-----NLERFMRRFNEQLQYWVATELCLCPVPGPRAQLLRKFIKLA-
AHLKE-QKNLNSFFAVMFGLSNSAISRLAHTWERLPHKVRKLYSALERLLDPSWNHRVYR
LALTK--LSP-----PVIPF-MPLLLKDMTFI-----
-----HEGNH--TLV-----E---NLINFE-KMRMMARAV---RMLHHCRSHS-----
-----SVPLSPLRSRVSHFHEDGQAAR----IST---CSEQS
>Rapgef3_[Erinaceus_europaeus]_1016600502
SAKDLAGQLTDHDWGLFNSIHQV----ELI-----HYVLG-PQHL----R--DV-TTA--
-----NLERFMRRFNEQLQYWVATELCLCPLPGSRAQLLRKFIKLA-
AHLKE-QKNLNSFFAIMFGLSNSAISRLAHTWERLPHKVRKLYSALERLLDPSWNHRVYR
LALSK--LSP-----PIIPF-MPLLLKDMTFI-----
-----HEGNH--TLV-----E---NLINFE-KMRMMARAV---RMLHHCRSHS-----
-----SVPLSPLRSRVSHLHEDSQAAR----IST---CSEQS
>Rapgef3_[Esox_lucius]_742184366
-SKDIAGQLTNYDWELFTAMHEV----ELV-----YYVFG-QHNF----P--GT-TTA--
-----NLERFVHRFNQVQYWVTEVCLCDDLKRAMLLKKFIKIA-
AMLKE-QKNLNSFFAVMFGLSNSAVQRLYKTERVPSKTKRVYCAYERLMDPSRNHRAYR
LAVAK--LTP-----PYIPF-MPLLLKDMTFM-----
-----HEGNQ--NYT-----E---KLVNFE-KMRMIKIV---KIVRGCRSTP-----
-----Y-VPSSPQKGLADRMFLETSPSIR----VSTY---SEQS
>Rapgef3_[Falco_cherrug]_929429028
SSKDLASHLTDYDWNLFKSIHQV----EMI-----HYIIG-PQKF----H--DV-TTA--
-----NLERVMRRFNEQLQYWVATELCLCPEVGRRAQLLRKFIKLA-
AHLKE-QKNLNSFFAVMFVGSNTAVSRLAKTWERLPHKIRKLHSLERMLDPSWNHRVYR
LAVAK--LSP-----PIIPF-VPLLLKDMTFI-----
-----HEGNR--TLA-----E---NLINFE-KMHMAKTV---RVLQRCRGHA-----
-----HAPLSPLRNRSPHRTEDPRAVR----IST---CSEQS
>Rapgef3_[Felis_catus]_410964201
SAKDLAGQLTDHDWNLFNSIHQV----ELI-----HYVLG-PQHL----R--DV-TTA--

```



```

-----NLERFMRRFNELQYWVATELCLCPVPLRAQLLRKFIKLA-
AHLKE-QKNLNSFFAVMFGLSNSAISRLAHTWERLPHKVRKLYSALERLLDPSWNHRVYR
LALTK--LSP-----PIIPF-MPLLLKDMTFI-----
-----HEGNH--TLV-----E---NLINFE-KMRMMARAV---RMLHHCRSHS-----
-----NVPLSPLRSRVSHFHEDSQAAR-----TST---CSEQS
>Rapgef3_[Ficedula_albicollis]_1020933356
SSKELASHLTDYDWSLFKSIHQV----EMI-----HYIVG-PQKF----H--EV-ATA--
-----NLARVMRRFNELQFWVATELCLCPELGRRQLLRKFIKLA-
AHLKE-QKNLNSFFAVMFGVSNTAVTRLAKTWERLPHKIRKLHSALERMLDPSWNHRVYR
LAVAK--LSP-----PIIPF-VPLLLKGL-----CPALG-----
-----TLWVCPTLSGGPSDPRE--AVR-----IST---CSEQS
>Rapgef3_[Fukomys_damarensis]_731247212
SAKDLAGQLTDHDWNLFSIHQV----ELI-----HYVLG-PQHL----R--DV-TTA--
-----NLERLMRRFNELQYWVATELCLCSVPGLRAQLLRKFIKLA-
AHLKE-QKNLNSFFAIMFGLSNSAISRLAHTWERLPHKVRKLYSALERLLDPSWNHRVYR
LALTK--LSP-----PIIPF-MPLLLKDMTFI-----
-----HEGNH--TLV-----E---NLINFE-KMRMMARAV---RLLHHCRSHS-----
-----TVPLSPLRSRVSHLHEDSQASR-----IST---CSEQS
>Rapgef3_[Fundulus_heteroclitus]_831559266
SSKDVAIELTNYDWELFTAMHEV----ELV-----YYIFG-RHKF----P--GA-TTA--
-----NLERFVRHFNVVQYWVTELCLEDLVKRAILLKKFIKIA-
SVLKE-QRNLNSFFAVMFGLSNSAVQRLYKTWDRIPSKTKRIYCAYERLMDPTRNHRAYR
LAVAK--LSP-----PYIPF-MPLLLKDMTFI-----
-----HEGNP--NYV-----D---KLVNFE-KMRMLAKTV---KIVRECRSQP-----
-----Y-VPSSPQRGLADRMFLDGPATR-----LSTY---SD--
>Rapgef3_[Galeopterus_variegatus]_667328784
-----V----ELI-----HYVLG-PQHL----R--DV-TTA--
-----NLERFMHRFNELQYWVATELCLCPVPGPRAQLLRKFIKLA-
AHLKE-QKNLNSFFAVMFGLSNSAISRLAHTWERLPHKIRKLYSALERLLDPSWNHRVYR
LALTK--LSP-----PIIPF-MPLLLKDMTFI-----
-----QEGNH--TLV-----E---NLINFE-KMRMMARAV---RMLHHCRSHS-----
-----SVPLSPLRSRASHLHEDSQVAR-----IST---CSEQS
>Rapgef3_[Geospiza_fortis]_930243948
SSKDLASHLTDYDWNLFKSIHQV----EMI-----HYIVG-PHKF----H--EV-ATA--
-----NLARVLRRGCQ-----PRDPIPAQRLPHKIRKL-
-----HSALERMLDPSWNHRVYR
LAVAK--LSP-----PIIPF-VPLLLKDMTFI-----
-----HEGNR--TLA-----E---NLINFE-KMHMAKTV---RVLQRCRGHA-----
-----HAPLSPLRSRSPHRPEDTKAVR-----IST---CSEQS
>Rapgef3_[Gorilla_gorilla_gorilla]_426372291
SAKDLAGQLTDHDWSLFNSIHQV----ELI-----HYVLG-PQHL----R--DV-TTA--
-----NLERFMRRFNELQYWVATELCLCPVPGSRAQLLRKFIKLA-
AHLKE-QKNLNSFFAVMFGLSNSAISRLAHTWERLPHKVRKLYSALERLLDPSWNHRVYR
LALAK--LSP-----PVIPIF-MPLLLKDMTFI-----
-----HEGNH--TLV-----E---NLINFE-KMRMMARAA---RMLHHCRSHN-----
-----PVPLSPLRSRVSHLHEDSQVAR-----IST---CSEQS
>Rapgef3_[Haliaeetus_leucocephalus]_729737483
SSKDLASHLTDYDWNLFKSIHQV----EMI-----HYIVG-PQKF----H--DV-TTA--
-----NLERVMRRFNELQYWVATELCLCPEVGRRQLLRKFIKLA-
AHLKE-QKNLNSFFAVMFGVSNTAVSRLAKTWERLPHKIRKLHSALERMLDPSWNHRVYR
LAVAK--LSP-----PIIPF-VPLLLKDMTFI-----
-----HEGNR--TLA-----E---NLINFE-KMHMAKTV---RVLQRCRGHA-----
-----HAPLSPLRNRSPHRPEDPKAIR-----IST---CSEQS

```

```

>Rapgef3_[Heterocephalus_glaber]_513003372
SAKDLAQQLTDQDWSLFNSIHQV----ELI-----HYVLG-PQHL----R--DV-TTA--
-----NLERFMRRFNQLQYWVATELCLCSVAGLRAQLLRKFIKLA-
AHLKE-QKNLNSFFAVMFGLSNSAISRLAHTWERLPHKVRKLYSALERLLDPSWNHRVYR
LALAK--LSP-----PIIPF-MPLLLKDMTFI-----
-----HEGNH--TLV-----E---NLINFE-KMRMMARTA---RLLHHCRSHS-----
-----TVPLSPLRSRVSHLHEDGQASR-----IST---CSEQS
>Rapgef3_[Homo_sapiens]_530399604
SAKDLAQQLTDHDWSLFNSIHQV----ELI-----HYVLG-PQHL----R--DV-TTA--
-----NLERFMRRFNELQYWVATELCLCPVPGPRAQLLRKFIKLA-
AHLKE-QKNLNSFFAVMFGLSNSAISRLAHTWERLPHKVRKLYSALERLLDPSWNHRVYR
LALAK--LSP-----PVIPF-MPLLLKDMTFI-----
-----HEGNH--TLV-----E---NLINFE-KMRMMARAA---RMLHHCRSHN-----
-----PVPLSPLRSRVSHLHEDSQVAR-----IST---CSEQS
>Rapgef3_[Ictidomys_tridecemlineatus]_914907256
SAKDLAQQLTDHDWNLFNSIHQV----ELI-----HYVLG-PQHL----R--DV-TTA--
-----NLERFMRRFNELQYWVATELCLCPVPGPRAQLLRKFIKLA-
AHLKE-QKNLNSFFAIMFGLSNSAISRLAHTWERLPHKVRKLYSALERLLDPSWNHRVYR
LALTK--LSP-----PVIPF-MPLLLKDMTFI-----
-----HEGNH--TLV-----E---NLINFE-KMRMMARAV---RMLHHCRSHS-----
-----TVPLSPLRSRVSHFHEDSQASR-----IST---CSEQS
>Rapgef3_[Jaculus_jaculus]_507569974
SAKDLAQQLTDHDWNLFNSIHQV----ELI-----HYVLG-PQHL----R--DV-TTA--
-----NLERFMRRFNELQYWVATELCLCPVPGPRAQLLRKFIKLA-
AHLKE-QKNLNSFFAVMFGLSNSAISRLAHTWERLPHKVRKLYSALERLLDPSWNHRVYR
LALTK--LSP-----PVIPF-MPLLLKDMTFI-----
-----HEGNH--TLV-----E---NLINFE-KMRMMARAV---RTLHHCRSHS-----
-----SVPLSPLRSRVSHLHEDSQASR-----IST---CSEQS
>Rapgef3_[Kryptolebias_marmoratus]_1041103289
SSKDVAIELTNYDWELFTAMHEV----ELV-----HYIFG-RHKF----P--GA-ITA--
-----NLERFVRHFNEVQYWVTELCLEDLVKRANLLKKFIKIA-
SVLKD-QKNLNLFFAVMFGLGNSAVQRLYKTWERIPSKTKRVYCTYERMMDPSRNHRAYR
LAVTK--LSP-----PYIPF-MPLLLKDMTFI-----
-----HEGNP--DCL-----D---KLVNFE-KMRMLAKTV---KIVRECRSQP-----
-----Y-VPSPQQRGLADRIFFLEGP-TR----LSTS---SE--
>Rapgef3_[Latimeria_chalumnae]_556946159
SSKDIANQLTDPDWDLFNCIHEV----ELVYIILGRHVFG-NITT----A-----
-----NLERFVCRFNEIQFWVTEIVLCSDLNKRVTLLKKFIKVA-
TILKE-QKNLNSFFAIMFGLSNSAVSRLSKTWERLPNKTRKLYSGFERLMDPSKNHRAYR
LAIT--KLSP-----PIIPF-IPLLLKDMTFV-----
-----HDGNK--TYL-----E---NLVNFE-KMRMIATTV---RIIQHCRSQ-----
-----
>Rapgef3_[Lepisosteus_oculatus]_972964891
SSKDIACQLSDYDWELFGAMHEV----ELV-----YYIFG-RHKF----R--GA-TTA--
-----NLERFVRRFNEVQHWVATELCLCPDLGKRALLKKFIKVA-
TVLKE-QKNLNSFFAVMFGLSNSAVQRLSRTWERLPSKTRRIYCAYERLMDPSRNHRAYR
LAVAK--LSS-----PYIPF-MPLLLKDMTFI-----
-----HEGNK--NHI-----E---GLVNFE-KMRMIAKTV---KIVRECRSQP-----
-----Y-VPASPQKGLTDRVFLETTAVR---VSTC---SEQS
>Rapgef3_[Leptonychotes_weddellii]_585154006
SAKDLAQQLTDHDWSLFNSIHQV----ELI-----HYVLG-PQHL----R--DV-TTA--
-----NLERFMRRFNELQYWVATELCLCPVPSLRAQLLRKFIKLA-
AHLKE-QKNLNSFFAIMFGLSNSAISRLAHTWERLPHKVRKLYSALERLLDPSWNHRVYR
LLLT--LSP-----PIIPF-MPLLLK-----

```

```

-----
-----
>Rapgef3_[Loxodonta_africana]_731457673
SAKDLAQQLTDHDWSLFNSIHQV----ELI-----HYVLG-PQHL----R--TV-TTA--
-----NLERFMRRFNEQLQYWVATELCLCPVPGPGLRAQLLRKFIKLA-
AHLKE-QKNLNSFFAVMFGLSNSAVSRLAHTWERLPHKVRKLYSALERLLDPSWNHRVYR
LALTK--LSP-----PVIPF-MPLLLKDMTFI-----
-----HEGNH--TLV-----E---NLINFE-KMRMMARAV---RMLHHCRGHS-----
-----NVPLSPLRSRVSHLHEDSQASR-----IST---CSEQS
>Rapgef3_[Macaca_fascicularis]_982281158
SAKDLAQQLTDHDWSLFNSIHQV----ELI-----YYVLG-PQHL----R--DV-TTA--
-----NLERFMRRFNEQLQYWVATELCLCPVPGPRAQLLRKFIKLA-
AHLKE-QKNLNSFFAVMFGLSNSAISRLAHTWERLPHKVRKLYSALERLLDPSWNHRVYR
LALAK--LSP-----PVIPF-MPLLLKDMTFI-----
-----HEGNH--TLV-----E---NLINFE-KMRMMARAA---RMLHHCRSHN-----
-----PVPLSPLRSRVSHLHEDSQVAR-----IST---CSEQS
>Rapgef3_[Macaca_mulatta]_966971990
SAKDLAQQLTDHDWSLFNSIHQV----ELI-----YYVLG-PQHL----R--DV-TTA--
-----NLERFMRRFNEQLQYWVATELCLCPVPGPRAQLLRKFIKLA-
AHLKE-QKNLNSFFAVMFGLSNSAISRLAHTWERLPHKVRKLYSALERLLDPSWNHRVYR
LALAK--LSP-----PVIPF-MPLLLKDMTFI-----
-----HEGNH--TLV-----E---NLINFE-KMRMMARAA---RMLHHCRSHN-----
-----PVPLSPLRSRVSHLHEDSQVAR-----IST---CSEQS
>Rapgef3_[Macaca_nemestrina]_795561749
SAKDLAQQLTDHDWSLFNGIHQV----ELI-----YYVLG-PQHL----R--DV-TTA--
-----NLERFMRRFNEQLQYWVATELCLCPVPGPRAQLLRKFIKLA-
AHLKE-QKNLNSFFAVMFGLSNSAISRLAHTWERLPHKVRKLYSALERLLDPSWNHRVYR
LALAK--LSP-----PVIPF-MPLLLKDMTFI-----
-----HEGNH--TLV-----E---NLINFE-KMRMMARAA---RMLHHCRSHN-----
-----PVPLSPLRSRVSHLHEDSQVAR-----IST---CSEQS
>Rapgef3_[Mandrillus_leucophaeus]_795173402
SAKDLAQQLTDHDWSLFNSIHQV----ELI-----YYALG-PQHL----R--DV-TTA--
-----NLERFMRRFNEQLQYWVATELCLCPVPGPRAQLLRKFIKLA-
AHLKE-QKNLNSFFAVMFGLSNSAISRLAHTWERLPHKVRKLYSALERLLDPSWNHRVYR
LALAK--LSP-----PVIPF-MPLLLKDMTFI-----
-----HEGNH--TLV-----E---NLINFE-KMRMMARAA---RMLHHCRSHN-----
-----PVPLSPLRSRVSHLHEDSQVAR-----IST---CSEQS
>Rapgef3_[Marmota_marmota_marmota]_984114365
SAKDLAQQLTDHDWNLFNSIHQV----ELI-----HYVLG-PQHL----R--DV-TTA--
-----NLERFMRRFNEQLQYWVATELCLCPVPGPGLRAQLLRKFIKLA-
AHLKE-QKNLNSFFAIMFGLSNSAISRLAHTWERLPHKVRKLYSALERLLDPSWNHRVYR
LALTK--LSP-----PVIPF-MPLLLKDMTFI-----
-----HEGNH--TLV-----E---NLINFE-KMRMMARAV---RMLHHCRSHS-----
-----TVPLSPLRSRVSHFHEDSQASR-----IST---CSEQS
>Rapgef3_[Maylandia_zebra]_499019354
SSKDIASELTNYDWELFTAMHEV----ELV-----YYIFG-RHKF----P--GA-ITA--
-----NLERFVRRFNEVQHWVLTELCLCEDLVKRAMLLKKFIKIA-
SVLKE-QKNLNSFFAVMFGLSNSAIQRLYKTWERIPSKTKRIYCSLERLMDPSRNHRAYR
LAIK--LSP-----PYIPF-MPLLLKDMTFI-----
-----HEGNA--NYV-----D---KLVNFE-KMRMLAKTV---KIVRGCRSQP-----
-----Y-VPSSPQRGLADRMFLEGAATR----LSTY---SD--
>Rapgef3_[Mesocricetus_auratus]_524925946
SAKDLAQQLTDHDWNLFNRIHQV----ELI-----HYVLG-PQHL----R--DV-TTA--
-----NLERFMRRFNEQLQYWVATELCLCSVPGPRAQLLRKFIKLA-

```

```
AHLKE-QKNLNSFFAVMFGLSNSAISRLAHTWERLPHKVRKLYSALERLLDPSWNHRVYR
LALTK--LSP-----PVIPIF-MPLLLKDMTFI-----
-----HEGNH--TLV-----E---NLINFE-KMRMMARAV---RMLHHCRSHS-----
-----TVPLSPLRSRVSHIHEDSQASR----IST---CSEQS
>Rapgef3_[Microtus_ochrogaster]_532021349
SAKDLAQQLTDLWDNSLFNRIHQV---ELI-----HYVLG-PQHL---R--DV-TTA--
-----NLERFMRRFNFELQYWVATELCLCSVPGPRAQLLRKFIKLA-
AHLKE-QKNLNSFFAVMFGLSNSAISRLAHTWERLPHKVRKLYSALERLLDPSWNHRVYR
LALTK--LSP-----PVIPIF-MPLLLKDMTFI-----
-----HEGNH--TLV-----E---NLINFE-KMRMMARAM---RMLHHCRSHS-----
-----TVPLSPLRSRVSHIHEDSQASR----IST---CSEQS
>Rapgef3_[Miniopterus_natalensis]_1016658187
SAKDLAQQLTDHDWNLFNRIHQV---ELI-----HYVLG-PQHL---R--DV-TTA--
-----NLERFMRRFNFELQYWVATELCLCPVPGPRAQLLRKFIKLA-
AHLKE-QKNLNSFFAVMFGLSNSAISRLAHTWERLPHKVRKLYSALERLLDPSWNHRVYR
LALTK--LSP-----PVIPIF-MPLLLKDMTFI-----
-----HEGNH--TLV-----E---NLINFE-KMRMMARAV---RMLHHCRSHS-----
-----NVPLSPLRSRVSHLHEDGQAAR----IST---CSEQS
>Rapgef3_[Mus_musculus]_1039748761
SAKDLAQQLTDHDWNLFNRIHQV---ELI-----HYVLG-PQHL---R--DV-TTA--
-----NLERFMRRFNFELQYWVATELCLCPVPGSRAQLLRKFIKLA-
AHLKE-QKNLNSFFAVMFGLSNSAISRLAHTWERLPHKVRKLYSALERLLDPSWNHRVYR
LALTK--LSP-----PVIPIF-MPLLLKDVTFI-----
-----HEGNH--TLV-----E---NLINFE-KMRMMARAV---RMLHHCRSHS-----
-----TAPLSPLRSRVSHIHEDSQGSR----IST---CSEQS
>Rapgef3_[Mustela_putorius_furo]_859851834
SAKDLAQQLTDHDWNLFNRIHQV---ELI-----HYVLG-PQHL---R--DV-TTA--
-----NLERFMRRFNFELQYWVATELCLCPVPGPGLRAQLLRKFIKLA-
AHLKE-QKNLNSFFAVMFGLSNSAISRLAHTWERLPHKVRKLYSALERLLDPSWNHRVYR
LALTK--LSP-----PIPIF-MPLLLKDMTFI-----
-----HEGNH--TLV-----E---NLINFE-KMRMMARAV---RMLQHCRSHS-----
-----NVPLSPLRSRVSHLHEDSQVAR---MST---CSEQS
>Rapgef3_[Myotis_brandtii]_521032880
SAKDLAVQLTDHDWNLFNRIHQV---ELI-----HYVLG-PQHL---R--DV-TTA--
-----NLERFMRRFNFELQYWVATELCLCPVPGPRAQLLRKFIKLA-
AHLKE-QKNLNSFFAVMFGLSNSAISRLAHTWERLPHKVRKLYSALERLL-----
-----
-----
-----
>Rapgef3_[Myotis_davidii]_432114532
SAKDLAVQLTDHDWNLFNRIHQV---ELI-----HYVLG-PQHL---R--DV-TTA--
-----NLERFMRRFNFELQYWVATELCLCPVPGPRAQLLRKFIKLA-
AHLKE-QKNLNSFFAVMFGLSNSAISRLAHTWERLPHKVRKLYSALERLLDPSWNHRVYR
LALTK--LSP-----PVIPIF-MPLLLKGSQLP-----
-----HRPGRGSALR-----P---GLMSLLCPQRMARAV---RMLHHCRSHS-----
-----NVPLSPLRSRVSHLHEDSQAAR----VST---CSEQS
>Rapgef3_[Myotis_lucifugus]_940740350
SAKDLAVQLTDHDWNLFNRIHQV---ELI-----HYVLG-PQHL---R--EV-TTA--
-----NLERFMRRFNFELQYWVATELCLCPVPGPRAQLLRKFIKLA-
AHLKE-QKNLNSFFAVMFGLSNSAISRLAHTWERLLHKVRKLYSALERLLDPSWNHRVYR
LALTK--LSP-----PVIPIF-MPLLLKDMTFI-----
-----HEGNH--TLV-----E---NLINFE-KMRMMARAV---RMLHHCRSHS-----
-----NVPLSPLRSRVSHLHEDIQAAR----VST---CSEQS
>Rapgef3_[Neolamprologus_brichardi]_583998066
```

```

SSKDIASELTNYDWELFTAMHEV----ELV-----YYIFG-RHKF----P--GA-ITA--
-----NLERFVRRFNEVQHWVLTELCLCEDLMKRAMLLKKFIKIA-
SVLKE-QKNLNSFFAVMFGLSNSAIQRLYKTWERIPSKTKRIYCSLERLMDPSRNHRAYR
LAIK--LSP-----PYIPF-MPLLLKDMTFI-----
-----HEGNA--NYV-----D---KLVNFE-KMRMLAKTV---KIVRGCRSQP-----
-----Y-VPSSPQRGLADRMFLEGAATR----LSTY---SD--
>Rapgef3_[Nomascus_leucogenys]_820994222
SAKDLAGQLTDRDWSLFNSIHQV----ELI-----HYVLG-PQHL----R--DV-TTA--
-----NLERFMRRFNEQYWVATELCLCPVPGPRAQLLRKFIKLA-
AHLKE-QKNLNSFFAVMFGLSNSAISRLAHTWERLPHKVRKLYSALERLLDPSWNHRVYR
LAXRQ--ALP-----PVIPF-MLLLLKDMTFI-----
-----HEGNH--TLV-----E---NLINFE-KMRMMARAA---RMLHHCRSHN-----
-----PVPLSPLRSRVSHLHEDSQVVR----IST---CSEQS
>Rapgef3_[Nothobranchius_furzeri]_1007768327
SSKDLAIELTNYDWELFNAMHEV----ELI-----YYIFG-RHKF----P--GA-ITA--
-----NLERFVRHFNEVQHWVATELCLCEDLVKRAVLLKKFIKIA-
SVLKE-QKNLNLFFAVMFGLSNSAVQRLYKTWERIPSKTKRIYCTYERLMDPSRNHRAYR
LAVAK--LSP-----PYTPF-MPLLLKDMTFI-----
-----HEGNP--NYT-----D---KLVNFE-KMRMLAKTV---KIVRGCRSQP-----
-----Y-VPSSPQRGLADRIFLEGP-TR----LSTN---SEHA
>Rapgef3_[Ochotona_princeps]_504177543
SAKDLAGQLTEQDRDLFHSIHQV----ELI-----HYVLG-PQHL----R--NV-TTA--
-----NLERFMRRFNQLQYWVATELCLCPLPGPRAQLLRKFIKLA-
AHLKE-QKNLNSFFAIMFGLSNSAITRLARTWERLPQKVRKLHSALERLLDPSWNHRAYR
VALAK--LSP-----PVIPF-MPLLLKDMTFI-----
-----HEGNR--TLV-----E---NLINFE-KMRMLARAV---RVLHHCQGHG-----
-----HAPLSPLRTRAHIHEDSQASR----IST---CSEQS
>Rapgef3_[Octodon_degus]_820979431
SAKDLAGQLTERDWGLFKCIHQV----ELI-----HYVLD-PQHL----R--DG-TTA--
-----NLERVLRRFNEQYWVATELCLCSAPGLRAQLLRKFIKLA-
AHLKE-QKNLNSFFAVMFGLSNSAISRLARTWERLPQKVRKLYSALERLLDPSWNHRVYR
LALRK--LSP-----PLIPF-MPLLLKDMTFI-----
-----HEGNR--TLV-----D---SLINFE-KMRMMARAA---RLLHYCRSHS-----
-----TAPLSPLRSRVSHLHEDSQALR----MST---CSEQS
>Rapgef3_[Odobenus_rosmarus_divergens]_823398553
SAKDLAGQLTDHDWSLFNSVHQV----ELI-----HYVLG-PQHL----R--DV-TTA--
-----NLERFMRRFNEQYWVATELCLCPVPGPRAQLLRKFIKLA-
AHLKE-QKNLNSFFAVMFGLSNSAISRLAHTWERLPHKVRKLYSALERLLDPSWNHRVYR
LLLT--LSP-----PIIPF-MPLLLKDMTFI-----
-----HEGNH--TLV-----E---NLINFE-KMRMLARAV---RMLHHCRSHS-----
-----NVPLSPLRSRVSHLHEDSQAAR----TST---CSEQS
>Rapgef3_[Opisthocomus_hoazin]_700398843
SSKDLASHLTDYDWNLFKRIHQV----EMI-----HYIVG-PQKF----H--DV-TTA--
-----NLERVMRRFNEQYWVATELCLCPEVGRRAQLLRKFIKLA-
AHLKE-QKNLNSFFAVMFVSNATVSRLAKTWE---HMAKTVRVLQR-----
-----
-----
>Rapgef3_[Orcinus_orca]_466031722
STKDLAGQLTDHDWSLFNSIHQV----ELI-----HYVLG-PQPL----R--DV-TTA--
-----NLERFMRRFNEQYWVATELCLCPVPGPRAQLLRKFIKLA-
AHLKE-QKNLNSFFAIMFGLSNSAISRLAQTWERLPHKVRKLYSALERLLDPSWNHRVYR
LALTK--LSP-----PLIPF-MPLLLKDMTFI-----
-----HEGNH--TLV-----E---NLINFE-KMRMMARAA---RMLHHCRSHS-----

```

-----NVPLSPLRSRVSHLHEDSQAAR----IST---CSEQS  
>Rapgef3\_[Oreochromis\_niloticus]\_542216386  
SSKDIASELTNYDWELFTAMHEV----ELV-----YYIFG-RHKF----P--GA-ITA--  
-----NLERFVRRFNEVQHWVLTELCLCEDLVKRAMLLKKFIKIA-  
SVLKE-QKNLNSFFAVMFGLSNSAIQRLYKTWERIPSKTKRIYCSLERLMDPSRNHRAYR  
LAIK--LSP-----PYIPF-MPLLLKDMTFI-----  
-----HEGNA--NYV-----D---KLVNFE-KMRMLAKTV---KIVRGCRSQP-----  
-----Y-VASSPQRGLADRMFLEGAATR----LSTY---SD--  
>Rapgef3\_[Ornithorhynchus\_anatinus]\_620972164  
SSRDLASLLSEYDWGLFHCVHQV---EPIL-----YVLGP--QRL----R--DI-TTA--  
-----NLERLMRRFNEQLQYWVTELCLCPAPAARARLLSRFIKLA-  
AQ-----  
-----  
-----  
-----  
>Rapgef3\_[Orycteropus\_afer\_afer]\_634839967  
STKDLAQQLTDHDSLFNSIHQV----ELI-----HYVLG-PQHL----R--TV-TTA--  
-----NLERFMRRFNEQLQYWVATELCLCPVPSLRAQLLRKFIKLA-  
AHLKE-QKNLNSFFAVMFGLSNSAISRLAHTWERLPHKVRKLYSALERLLDPSWNHRVYR  
LALTK--LSP-----PVIPIF-MPLLLKDMTFI-----  
-----HEGNH--TLV-----E---NLINFE-KMRMMARAV---RMLHQCRSHS-----  
-----NVPLSPLRSRVSHLHEDSQAAR----IST---CSEQS  
>Rapgef3\_[Oryctolagus\_cuniculus]\_1040227932  
SAKDLASQLTEQDRDLFYSVHQV----ELI-----HYVLG-PQHL----R--DV-TTA--  
-----NLERFMRRFNEQLQYWVATELCLCLPGPRAQLLRKFIKLA-  
AHLKE-QKNLNSFFAVMFGLSNSAISRLAHTWERLPQKVRKLHSALERLLDPSWNHRAYR  
VALAK--LSP-----PIIPF-MPLLLKDMTFI-----  
-----HEGNR--TLV-----E---NLINFE-KMRMMARAV---RVLQHCRGHG-----  
-----HAPLSPLRTRASHVHEDSQASR----IST---CSEQS  
>Rapgef3\_[Oryzias\_latipes]\_765126149  
GSKDMAAELTNFDWELFTAVHEV----ELV-----YYIFG-RNKF----P--GA-ITA--  
-----NLERFVRHFNKLQYWVATELCLCEDLMKRALLKKFIKIA-  
SVLKE-QKNLNSFFAVMFGLSNSAVQRLYKTWERIPSKIKRIYCTYERLMDPSRNHRAYR  
LAVAK--LNP-----PYIPF-MPLLLKDMTFI-----  
-----HEGNP--SYV-----D---KLVNFE-KMRMLAKTV---NIVRGCRSQP-----  
-----Y-VPSSPQRGLADRMFLEGPATR----LSTY---SDHS  
>Rapgef3\_[Otolemur\_garnettii]\_831232292  
SAKDLAQQLTDHDWNLFSIHQV----ELI-----HYALG-PQHL----R--DV-TTA--  
-----NLERFMRRFNEQLQYWVATELCLCPVPGPRAQLLRKFIKLA-  
AHLKE-QKNLNSFFAVMFGLSNSAISRLAHTWERLPHKVRKLYSALERLLDPSWNHRVYR  
LALAK--LSP-----PAIPF-MPLLLKDMTFI-----  
-----HEGNH--TIV-----E---NLINFE-KMRMMARAV---RMLHHCRGHS-----  
-----SVPLSPLRTRVSHFHEDNQVAR----IST---CSEQS  
>Rapgef3\_[Ovis\_aries\_musimon]\_803304007  
STKDLAQQLTDHDSLFNSIHQV----ELI-----HYVLG-PQHL----R--DV-TTA--  
-----NLERFMRRFNEQLQYWVATELCLCSVPGLRAQLLRKFIKLA-  
AHLKE-QKNLNSFFAVMFGLSNSAISRLAHTWERLPHKVRKLYSALERLLDPSWNHRVYR  
LALTK--LSP-----PLIPF-MPLLLKDMTFI-----  
-----HEGNH--TLV-----E---NLINFE-KMRMMARAA---RMLHHCRSHS-----  
-----NVPLSPLRSRVSHLHEDSQAVR----VST---CSEQS  
>Rapgef3\_[Ovis\_aries]\_803044458  
STKDLAQQLTDHDSLFNSIHQV----ELI-----HYVLG-PQHL----R--DV-TTA--  
-----NLERFMRRFNEQLQYWVATELCLCSVPGLRAQLLRKFIKLA-  
AHLKE-QKNLNSFFAVMFGLSNSAISRLAHTWERLPHKVRKLYSALERLLDPSWNHRVYR

LALTK--LSP-----PLIPF-MPLLLKDMTFI-----  
-----HEGNH--TLV-----E---NLINFE-KMRMMARAA---RMLHHCRSHS-----  
-----NVPLSPLRSRVSHLHEDSQAVR----VST---CSEQS  
>Rapgef3\_[Pan\_paniscus]\_675783064  
SAKDLAQQLTDHDWSLFNSIHQV----ELI-----HYVLG-PQHL----R--DV-TTA--  
-----NLERFMRRFNELQYWVATELCLCPVPGPRAQLLRKFIKLA-  
AHLKE-QKNLNSFFAVMFGLSNSAISRLAHTWERLPHKVRKLYSALERLLDPSWNHRVYR  
LALAK--LSP-----PVIPF-MPLLLKDMTFI-----  
-----HEGNH--TLV-----E---NLINFE-KMRMMARAA---RMLHHCRSHN-----  
-----PVPLSPLRSRVSHLHEDSQVAR----IST---CSEQS  
>Rapgef3\_[Pan\_troglodytes]\_694950439  
SAKDLAQQLTDHDWSLFNSIHQV----ELI-----HYVLG-PQHL----R--DV-TTA--  
-----NLERFMCRFNELQYWVATELCLCPVPGPRAQLLRKFIKLA-  
AHLKE-QKNLNSFFAVMFGLSNSAISRLAHTWERLPHKVRKLYSALERLLDPSWNHRVYR  
LALAK--LSP-----PVIPF-MPLLLKDMTFI-----  
-----HEGNH--TLV-----E---NLINFE-KMRMMARAA---RMLHHCRSHN-----  
-----PVPLSPLRSRVSHLHEDSQVAR----IST---CSEQS  
>Rapgef3\_[Panthera\_tigris\_altaica]\_591291251  
SAKDLAQQLTDHDWNLFNSIHQV----ELI-----HYVLG-PQHL----R--DV-TTA--  
-----NLERFMRRFNELQYWVATELCLCPVGLRAQLLRKFIKLA-  
AHLKE-QKNLNSFFAVMFGLSNSAISRLAHTWERLPHKVRKLYSALERLLDPSWNHRVYR  
LALTK--LSP-----PIIPF-MPLLLKDMTFI-----  
-----HEGNH--TLV-----E---NLINFE-KMRMMARAV---RMLHHCRSHS-----  
-----NVPLSPLRSRVSHLHEDSQVAR----TST---CSEQS  
>Rapgef3\_[Pantholops\_hodgsonii]\_556771829  
STKDLAQQLTDHDWSLFNSIHQV----ELI-----HYVLG-PQHL----R--DV-TAA--  
-----NLERFMRRFNELQYWVATELCLCSVPGLRAQLLRKFIKLA-  
AHLKE-QKNLNSFFAVMFGLSNSAISRLAHTWERLPHKVRKLYSALERLLDPSWNHRVYR  
LALTK--LSP-----PLIPF-MPLLLKDMTFI-----  
-----HEGNH--TLV-----E---NLINFE-KMRMMARAA---RMLHHCRSHS-----  
-----NVPLSPLRSRVSHLHEDSQAVR----VST---CSEQS  
>Rapgef3\_[Papio\_anubis]\_402885758  
SAKDLAQQLTDHDWSLFNSIHQV----ELI-----YYALG-PQHL----R--DV-TTA--  
-----NLERFMRRFNELQYWVATELCLCPVPGPRAQLLRKFIKLA-  
AHLKE-QKNLNSFFAVMFGLSNSAISRLAHTWERLPHKVRKLYSALERLLDPSWNHRVYR  
LALAK--LSP-----PVIPF-MPLLLKDMTFI-----  
-----HEGNH--TLV-----E---NLINFE-KMRMMARAA---RMLHHCRSHN-----  
-----PVPLSPLRSRVSHLHEDSQVAR----IST---CSEQS  
>Rapgef3\_[Parus\_major]\_998744296  
--KDLASHLTDYDWNLFKSIHQV----EMI-----HYIVG-PQKF----H--EV-TTA--  
-----NLARVMRRFNELQFWVATELCLCPELGRRRAQLLRKFIKLA-  
AQCP-----PH-----AQDPSWNHRVYR  
LAVAK--MSP-----PIIPF-MPLLLKDMTFI-----  
-----HEGNR--TLA-----E---NLINFE-KMHMAKTV---RVLQRCRGHA-----  
-----HAPLSPLNRNSPHRPEDPKAVR----IST---CSEQS  
>Rapgef3\_[Peromyscus\_maniculatus\_bairdii]\_589923021  
SAKDLAQQLTDHDWNLFNKIHQV----ELI-----HYVLG-PQHL----R--DV-TTA--  
-----NLERFMRRFNELQYWVATELCLCPVPGPRAQLLRKFIKLA-  
AHLKE-QKNLNSFFAVMFGLSNSAISRLAHTWERLPHKVRKLYSALERLLDPSWNHRVYR  
LALTK--LSP-----PVIPF-MPLLLKDMTFI-----  
-----HEGNH--TLV-----E---NLINFE-KMRMMARAV---RMLHQCRSHS-----  
-----TVPLSPLRSRVSHIHEDSQASR----IST---CSEQS  
>Rapgef3\_[Physeter\_catodon]\_593715976  
STKDLAQQLTDHDWSLFNSIHQV----ELI-----HYVLG-PQPL----R--DV-TTA--

```

-----NLERFMRRFNELQYWVATELCLCPVPLRAQLLRKFIKLA-
AHLKE-QKNLNSFFAIMFGLSNSAISRLAQTWERLPHKVRKLYSALERQLDPSWNHRVYR
LALTK--LSP-----PLIPF-MPLLLKDMTFI-----
-----HEGNH--TLV-----E---NLINFE-KMRMMARAA---RILHHCRSHS-----
-----NVPLSPLRSRVSHLHEDSQVAR-----IST---CSEQS
>Rapgef3_[Poecilia_formosa]_617405404
SSKDIATELTNYDWELFTAMHEV----ELV-----YYIFG-RHKF----P--GA-TTA--
-----NLERFVRHFNVVQHWVVTCLCEDLVKRAILLKKFIKIA-
SVLKE-QRNLNSFFAVMFGLSNSVQRLYKTWERIPSKTKRIYCAYERLMDPSRNHRAYR
LAVAK--LSP-----PYIPF-MPLLLKDMTFI-----
-----HEGNP--NYV-----D---KLVNFE-KMRMLAKTV---KIVRGCRSQP-----
-----Y-VPSSPQRLADRMFLDGPATR-----LSTY---SD--
>Rapgef3_[Poecilia_reticulata]_658859927
SSKDIATELTNYDWELFTAMHEV----ELV-----YYIFG-RHKF----P--GA-TTA--
-----NLERFVRHFNVVQYWVVTCLCEDLVKRAILLKKFIKIA-
SVLKE-QRNLNSFFAVMFGLSNSAVQRLYKTWERIPSKTKRIYCAYERLMDPSRNHRAYR
LAVAK--LSP-----PYIPF-MPLLLKDMTFI-----
-----HEGNP--NYV-----D---KLVNFE-KMRMLAKTV---KIVRGCRSQP-----
-----Y-VPSSPQRLADRMFLDGPATR-----LSTY---SD--
>Rapgef3_[Pristionchus_pacificus]_802732026
GSAELATQLGFFHMELFHATNEL----ETI-----AQVFG-RDAF--PGH-----IPS--
-----NLDLLRRFNEVQYWATTEVLVSPAP-KRVQSLRKLKIKIA-
HYSKQ-QGDLLSLFAIVLGLSNVAVSRLSMTWEKLP SRVKRMFSELESLLDPTRNHRAYR
SLIAK--MQP-----PFVPF-IPLLLKDLTFI-----
-----HEGNK--TFF-----N---GLVNFE-KMHMIANVI---RTFKECKASASGVTG
ILHR-DE-----KPDSQLHIRN-LRVIDDQRRLLLEMSYL---IEPK
>Rapgef3_[Propithecus_coquereli]_826277148
SAKDLAQQLTDHDWNLFNSIHQV----ELI-----HYVLG-PQHL----R--DV-TTA--
-----NLERFMRRFNELQYWVATELCLCSVPGLRAQLLRKFIKLA-
AHLKE-QKNLNSFFAVMFGLSNSAISRLAHTWQRLPHKVRKLYSALERLLDPSWNHRVYR
LALAK--LSP-----PVIPIF-MPLLLKDMTFI-----
-----HEGNH--TLV-----E---NLINFE-KMRMMARAV---RMLHHCRGHS-----
-----SVPLSPLRSRVSHLHEDGQALR-----IST---CSEQS
>Rapgef3_[Protobothrops_mucrosquamatus]_1002588985
SSKDLANQITEHDWNLFKSLHQV----ELI-----YYVVG-SQKF----P--SA-TTV--
-----NVERFLRRFNELOFWITTELCLCPDVIKRAQLLRKFIKLA-
AHLKD-QRNLNSFFAVMFGLSHSAISRLSRTWEKLPYKTRKLYGTMERMLDPSWNHRVYR
LAVAK--LSP-----PMIPF-MPLLLKDMTFI-----
-----HEGNR--TLV-----E---NLVNFE-KLRMMAKAV---HLVHHCRSHP-----
-----NLPLSPLRSRPQHLLLEEARAMR---TST---CSVQS
>Rapgef3_[Pseudopodoces_humilis]_929508805
--KDLASHLTDYDWNLFKSIHQV----EMI-----HYIVG-PQKF----H--EV-TTA--
-----NLARVMRRFNELOFWVATELCLCPGLGRRRAQLLRKFIKLA-
AHLKE-QKNLNSFFAVMFVGSNTAVTRLAKTWERLPHKIRKLHSALERMLDPSWNHRVYR
LAVAK--MSP-----PIIPF-MPLLLKDMTFI-----
-----HEGNR--TLA-----E---NLINFE-KMHMAKTV---RVLQRCRGHA-----
-----HAPLSPLRNRSPHRPEDAKAVR---IST---CSEQS
>Rapgef3_[Pteropus_vampyrus]_759143390
SAKDLAQQLTDHDWNLFNSIHQV----ELI-----HYVLG-PQHL----R--DV-TTA--
-----NLERFMRRFNELQYWVATELCLCAVPGPRAQLLRKFIKLA-
AHLKE-QKNLNSFFAVMFGLSNSAISRLARTWERLPHKVRKLYSALERLLDPSWNHRVYR
LALTK--LSP-----PVIPIF-MPLLLKDMTFI-----
-----HEGNH--TLV-----E---NLINFE-KMRMMARAV---RMLHHCRSHS-----
-----NVPLSPLRSRVSHLHEDSQAVR---IST---CSEQS

```



```

>Rapgef3_[Pundamilia_nyererei]_548483158
SSKDIASELTNYDWELFTAMHEV----ELV-----YYIFG-RHKF----P--GA-ITA--
-----NLERFVRRFNEVQHWVLTELCLCEDLVKRAMLLKKFIKIA-
SVLKE-QKNLNSFFAVMFGLSNSAIQRLYKTWERIPSKTKRIYCSLERLMDPSRNHRAYR
LAIK--LSP-----PYIPF-MPLLLKDMTFI-----
-----HEGNA--NYV-----D---KLVNFE-KMRMLAKTV---KIVRGCRSQP-----
-----Y-VPSSPQRLADRMFLEGAATR----LSTY---SD--
>Rapgef3_[Python_bivittatus]_602664072
SSKDLANQFTEHDWNLFKSIHQV----ELI-----YYVVG-PQKF----P--SA-TTA--
-----NVERFLRRFNEQLQFWVTTELCLCPDVIKRAQLLRKFIKLA-
AHLKD-QKNLNSFFAVMFGLSHSAISRLSRTWEKLPKTRKLYGTMERMLDPSWNHRVYR
LAVK--LSP-----PMIPF-MPLLLKDMTFI-----
-----HEGNR--TLV-----E---NLVNFE-KLRMMAKAV---RLVHHCRSHP-----
-----NLPLSPLRSRPQHLMEEARAMR-----TST---CSEQS
>Rapgef3_[Rhinopithecus_roxellana]_724952752
SAKDLAQQLTDHDWNLFSIHQV----ELI-----YYVLG-PQHL----R--DV-TTA--
-----NLERFMRRFNEQLQYWVATELCLCPVPGPRAQLLRKFIKLA-
AHLKE-QKNLNSFFAVMFGLSNSAISRLAHTWERLPHKVRKLYSALERLLDPSWNHRVYR
LALAK--LSP-----PVIPIF-MPLLLKDMTFI-----
-----HEGNH--TLV-----E---NLINFE-KMRMMARAA---RMLHHCRSHN-----
-----PVPLSPLRSRVSHLHEDSQVAR----IST---CSEQS
>Rapgef3_[Rousettus_aegyptiacus]_1012262855
SAKDLAQQLTDHDWNLFSIHQV----ELI-----HYVLG-PQHL----R--DV-TTA--
-----NLERFMRRFNEQLQYWVATELCLCAVPGPRAQLLRKFIKLA-
AHLKE-QKNLNSFFAVMFGLSNSAISRLARTWERLPHKVRKLYSALERLLDPSWNHRVYR
LALTK--LSP-----PIIPF-MPLLLKDMTFI-----
-----HEGNH--TLV-----E---NLINFE-KMRMMARAV---RMLHHCRSHS-----
-----NVPLSPLRSRVSHLHEDSQAVR----IST---CSEQS
>Rapgef3_[Saimiri_boliviensis_boliviensis]_403301658
SAKDLAQQLTDHDWNLFSIHQV----ELI-----HYVLG-PQHL----R--DV-TTA--
-----NLERFMRRFNEQLQYWVATELCLCAVPGPRAQLLRKFIKLA-
AHLKE-QKNLNSFFAVMFGLSNSAISRLAHTWERLPHKVRKLYSALERLLDPSWNHRVYR
LALAK--LSP-----PVIPIF-MPLLLKDMTFI-----
-----HEGNH--TLV-----E---NLINFE-KMRMMARAA---RMLHHCRSHN-----
-----PVPLSPLRSRVSHLHEDSQVAR----IST---CSEQS
>Rapgef3_[Salmo_salar]_929230181
-SKDIASQLTNYDWELFTAMHEV----ELV-----YYIFG-RHKF----P--GA-TTA--
-----NLERFVHRFNEVQYWVTEVCLCADLMKRAMLLKKFIKMA-
AMLKE-QKNLNSFFAVMFGLSNSAVQRLYKTWERVPSKTKRVYCAYERLMDPSRNHRAYR
LAVAK--LSP-----PYIPF-MPLLLKDMTFI-----
-----HEGNK--NYT-----E---KLVNFE-KMRMIAKT---KIVRGCRSTP-----
-----Y-VPSSPQKGLADRMFLEAPSIR----VSTY---SEQS
>Rapgef3_[Sarcophilus_harrisii]_821489511
SAKDLANQLTDHDWNLFKSIHQV----ELI-----HYVLG-PQQL----R--NA-TTA--
-----NLERFMRRFNEQLQYWVATELCLCPVGLRTQLLRKFIKLA-
SHLKE-QKNLNSFFAIMFGLSNSAISRLALTWERLPHKVRKLYSALEQLLDPSWNHRVYR
LALTK--LSP-----PIIPF-MPLLLK-----
-----
>Rapgef3_[Scleropages_formosus]_938064599
SSKDIASQLSDYDWELFGTMPEV----ELV-----YYVFG-RHKF----P--GA-TTA--
-----NLERFVRRFNEVQYWVTEMCLCADL-KRALLLKKFIKMA-
TILKE-QKNLNSFFAVMFGLSNCAVQRLSKTWE-----DPSRNHRAYR
LAVAK--LNP-----PYIPF-MPLLLKDMTFI-----

```

-----HEGNN--NYT-----E---NLVNFE-KMRMIAKTV---KTVRECRSQP-----  
-----Y-IPSSPQRSLADMFLDAPPVR-----ISTY---SEQS  
>Rapgef3\_[Sinocyclocheilus\_anshuiensis]\_1025146268  
-SKDMASQHTSYDWELFMAMHEV----ELV-----YYVLG-REKF----L--GA-TTA--  
-----NLERFVRRFNEIQYWVATELCLCEDLVKRAILLKKFIKMA-  
VVFKE-QKNLNSFFAVMFGLSNSAVQRLNKTWERLPNKTAKRIYCYERLMDPSRNHRAYR  
LAVAK--LSP-----PYIPF-MPLLLKDMTFI-----  
-----HEGNN--NYT-----D---KLVNFE-KMRMIARTV---KTVRQCRSQP-----  
-----Y-VPSSPQKGLTERMFLDAQAIR-----LSTY---SDQS  
>Rapgef3\_[Sinocyclocheilus\_grahami]\_1020398505  
-SKDMASQHTSYDWELFMAMHEV----ELV-----YYVLG-REKF----L--GA-TTA--  
-----NLERFVRRFNEIQYWVATELCLCEDLVKRAILLKKFIKMA-  
VVFKE-QKNLNSFFAVMFGLSNSAVQRLNKTWERLPNKTAKRIYCYERLMDPSRNHRAYR  
LAVAK--LSP-----PYIPF-MPLLLKDMTFI-----  
-----HEGNN--NYT-----D---KLVNFE-KMRMIARTV---KTVRQCRSQP-----  
-----Y-VPSSPQKGLTERMFLDAQAIR-----LSTY---SDQS  
>Rapgef3\_[Sinocyclocheilus\_rhinocerosus]\_1025211968  
-SKDMASQHTSYDWELFMAMHEV----ELV-----YYVLG-REKF----L--GA-TTA--  
-----NLERFVRRFNEIQYWVATELCLCEDLVKRAILLKKFIKMA-  
VVFKE-QKNLNSFFAVMFGLSNSAVQRLNKTWERLPNKTAKRIYCYERLMDPSRNHRAYR  
LAVAK--LSP-----PYIPF-MPLLLKDMTFI-----  
-----HEGNN--NYT-----D---KLVNFE-KMHMIARTV---KTVRQCRSQP-----  
-----Y-VPSSPQKGLTERMFLDAQAIR-----LSTY---SDQS  
>Rapgef3\_[Sorex\_araneus]\_836708039  
SAKDLAQLTEHDWSLFNSIHQV----ELI-----HYVLG-PQHL----R--DV-TTA--  
-----NLERFLRRFNEIQYWVATELCLCPVPGPRAQLLRKFIKLA-  
AHLKE-QKNLNSFFAVMFGLSNSAISRLAHTWERLPQKVRKLYSALERLLDPSWNHRVYR  
LALTK--LSP-----PVIPIF-MPLLLKDMTFI-----  
-----HEGNH--TLV-----E---NLINFE-KMRMMARAV---RMLHHCRSHS-----  
-----NVPLSPLRSRVSHLHEDSQAAR-----IST---CSEQS  
>Rapgef3\_[Struthio\_camelus\_australis]\_697484424  
SSKDLASHLTDYDWNLFKSIHQV----EMI-----HYIIR-PQKF----H--DV-TTA--  
-----NLERVMRRFNEIQYWVATELCLCPEVGRRRAQLLRKFIKLA-  
AHLKE-QKNLNSFFAVMFVGSNTAVSRLAKTWEKLPKIRKLHAALERMLDPSWNHRVYR  
LAVAK--LSP-----PIIPF-VPLLLKDMTFI-----  
-----HEGNR--TLA-----E---NLINFE-KMHMAKTV---RVLQRCRGHT-----  
-----HAPVSPLRSRSPHRLEDPKAMR-----IST---CSEQS  
>Rapgef3\_[Sturnus\_vulgaris]\_959091038  
-----ALTCRLSQV----EMI-----HYIVG-PHKS---HE---V-ATA--  
-----NLARVLRRFNEIQFWVATELCLCPELGRRARLLRKFILKA-  
AHLKE-QKNLNSFFAVMFVGSNTAVTRLAKTWEMLPHKIRKLHSALERMLLWSWVPWLLS  
MAPTVPLVAPTVPPLVA-PTVPL-V-----  
-----  
  
>Rapgef3\_[Sus\_scrofa]\_545893683  
-----  
-----RRFNEIQYWVATELCLCSVPSLRAQLLRKFIKLA-  
AHLKE-QKNLNSFFAVMFGLSNSAISRLAHTWERLPKVRKLYSALERLLDPSWNHRVYR  
VALTK--LSP-----PVIPIF-MPLLLK-----  
-----  
  
>Rapgef3\_[Takifugu\_rubripes]\_768914882  
GSKDIATELTNYDWELFAAMHEA----ELI-----YYVFG-RHKF----P--GA-TTA--  
-----NLERFVRRFNEVQHWVATELCLCEDLVKRAVLLKKFIKIA-

SVLKE-QKNLNSFFAVMFGLSNSAVRRLYKTWERIPSKTKRIYCSYERLMDPSRNHRAYR  
 LTVAK--LGP-----PYIPF-MPLLLKDMTFI-----  
 -----NEGNP--NYL-----E---KLVNFE-KMRMIAKTV---KVVRGCRSHP-----  
 -----Y-TPSSPQRSLADMFLDGPTR---MSTC---SE--  
 >Rapgef3\_[*Tinamus\_guttatus*]<sub>719772822</sub>  
 SSKDLASHLTDYDWNLFKSIHQV----EMI-----HYIVR-PQKF----H--DV-TTA--  
 -----NLERVMRRFNEQLQYWVATELCLCPEVGRRQQLLRKFIKLA-  
 AHLKE-QKNLNSFFAVMFVGSNTAVSRLAKTWERLPHKIRKLHSALERMLDPSWNHRVYR  
 LAVAK--LSP-----PIIPF-VPLLLKDMTFI-----  
 -----HEGNR--TLA-----E---NLINFE-KMHMAKTV---RVLQRCQGHA-----  
 -----HAPLSPLRSRSPHRLEDPKAMR-----IST---CSEQS  
 >Rapgef3\_[*Trichechus\_manatus\_latirostris*]<sub>823404739</sub>  
 SAKDLAGQLTDHDSLFNSIHQV----ELI-----HYVLG-PQHL----R--TV-TTA--  
 -----NLERFMRRFNEQLQYWVATELCLCPVPGRLAQQLLRKFIKLA-  
 AHLKE-QKNLNSFFAVMFGLSNSAISRLAHTWERLPHKVRKLYSALERLLDPSWNHRVYR  
 LALTK--LSP-----PVIPIF-MPLLLKDITFI-----  
 -----HEGNH--TLV-----E---NLINFE-KMRMMARAV---RMLHHCRSHS-----  
 -----NVPLSPLRSRVSHLHEDSQPSR-----ISM---CSEQS  
 >Rapgef3\_[*Tupaia\_chinensis*]<sub>444514991</sub>  
 SAKDLAGQLTDHDSLFNSIHQV----ELI-----HYVLG-PQHL----R--DV-TTA--  
 -----NLERFMRRFNEQLQYWVATELCLCPVPGPRAQLLRKFIKLA-  
 AHLKE-QKNLNSFFAVMFGLSNSAISRLAHTWQRLPHKVRKLYSALERLLDPSWNHRVYR  
 LALTK--LSP-----PIIPF-MPLLLKDMTFI-----  
 -----HEGNH--TLV-----E---NLINFE-KMRMMARAV---RMLHHCRSHS-----  
 -----  
 >Rapgef3\_[*Tursiops\_truncatus*]<sub>470596594</sub>  
 STKDLAGQLTDHDSLFNSIHQV----ELI-----HYVLG-PQPL----R--DV-TTA--  
 -----NLERFMRRFNEQLQYWVATELCLCPVPGPRAQLLRKFIKLA-  
 AHLKE-QKNLNSFFAIMFGLSNSAISRLAQTWERLPHKVRKLYSALERLLDPSWNHRVYR  
 LALTK--LSP-----PLIPF-MPLLLKDMTFI-----  
 -----HEGNH--TLV-----E---NLINFE-KMRMMARAA---RMLHHCRSHS-----  
 -----NVPLSPLRSRVSHLHEDSQAAR-----IST---CSEQS  
 >Rapgef3\_[*Vicugna\_pacos*]<sub>970713237</sub>  
 STKDLAGQLTDHDSLFNSIHQV----ELI-----HYVLG-PQHL----R--DV-TTA--  
 -----NLERFMRRFNEQLQYWVATELCLCPVPGPRAQLLRKFIKLA-  
 AHLKE-QKNLNSFFAIMFGLSNSAISRLAHTWERLPHKVRKLYSALERLLDPSWNHRVYR  
 LALTK--LSP-----PVIPIF-MPLLLKDMTFI-----  
 -----HEGNH--TLV-----E---NLINFE-KM-----  
 -----  
 >Rapgef3\_[*Xenopus\_laevis*]<sub>148227834</sub>  
 SSKDLAQMTDNDWNLFKSIHQV----ELI-----YHTFG-KQRF----R--NA-TTA--  
 -----NLERFMRRFNEVQFWVATEVCLCQEEERRAQLLKFIKLA-  
 AYLKE-QKNLNSFFAVMFGLSNTAVSRLSRTWQKLPNKIRKLYSIFERLMDPSWNHRSYR  
 LAVAK--LSA-----PLIPF-LPLILKDLTFL-----  
 -----HEGNR--STL-----D---NLVNFE-KMRMIAKTV---QMFHRCRSQA-----  
 -----YVPLSPLRTRPVYILEDPSAAR-----ISA---CSEHS  
 >Rapgef3\_[*Xenopus\_tropicalis*]<sub>847104409</sub>  
 SSKDLAQMTDNDWNLFKSIHQV----ELI-----YHTFG-KQRF----R--NA-TTA--  
 -----NLERFMRRFNEVQFWVATEVCLCQEEERRALLKFIKLA-  
 AYLKE-QKNLNSFFAVMFGLSNTAVSRLSRTWQKLPNKFRKLYSIFERLMDPSWNHRSYR  
 LAVAK--LSA-----PLIPF-LPLILKDLTFL-----  
 -----HEGNR--STL-----D---SLVNFE-KMRMIAKTV---QMFHSCRSQA-----  
 -----YIPLSPLRPRPVNILEDPSAAR-----ISA---CSEHS  
 >Rapgef4\_[*Acanthisitta\_chloris*]<sub>677814020</sub>

SSKDLAHQMTIYDWELFNCVHEL----ELI-----YHTFG-RHNF--K-K-----TTA--  
-----NLDLFLRRFNEIQFWVTEICLCSQLSKRVQLLKYYIKIA-  
AHCKE-YKNLNSFFAIIMGLSNVAVSRLSLTWEKLPSKFKKIYAEFESLMDPSRNHRAYR  
LTVAK--LDP-----PIIPF-MPLLIKDMTFT-----  
-----HEGNK--TFT-----D---NLVNFE-KMRMIANTV---RTVKFCRSQSFPNDA  
ALAN-KN-----HQDVSRYVRQ-LNVIDNQRTLSQMSHR---LEPR  
>Rapgef4\_[Acinonyx\_jubatus]\_961712463  
SSKDLAYQMTIYDWELFNCVHEL----ELI-----YHTFG-RHNF--K-K-----TTA--  
-----NLDLFLRRFNEIQFWVTEICLCSQPSKRVQLLKFFIKIA-  
AHCKE-YKNLNSFFAIVMGLSNVAVSRLALTWEKLPSKFKKFYAEFESLMDPSRNHRAYR  
LTVAK--LEP-----PLIPF-MPLLIKDMTFT-----  
-----HEGNK--TFI-----D---NLVNFE-KMRMIANTA---RTVRYCRSQPFNPDA  
AQAN-KN-----HQDVSRYVRQ-LNVIDNQRTLSQMSHR---LEPR  
>Rapgef4\_[Acropora\_digitifera]\_1005470793  
GAKELAYFISQYDFALFNAVNVY----EFI-----YHVFG-KEY---NQ---I--TA--  
-----NLDMLLRRLENEVRFWIETQVLLTQQLSKRVYLLKTFIKLA-  
AHCKE-LNNWNSFFAILMALNSVAVSRLTQTWEKVPRKFRNILEQFDSILEPTRNHRVYR  
LLVGKQ--KP-----PILPF-VPLLIKDMTFA-----  
-----NEGNK--TYL-----D---DLVNFE-KMRMIASSV---RFFHYCRSEPFTADC  
PSLG---R-----PSQEIAAFVRD-WKVIDNERTLTQLSHG---LQPK  
>Rapgef4\_[Acyrtosiphon\_pisum]\_641671152  
STKELAYHMTLFDWELFWNVHEY----ELI-----YLTFG-RHRF--Q-Q-----ITA--  
-----NLDIFLRRFNEIQYWVITEICTSQNISKRTNLLKKMIKLA-  
TYCKE-YYNFNAFFAILMGLSDVAVSRLSTTWDLPSKSRKQFTEYETLIDPSRNHRAYR  
ITVGK--LPS-----PMIPF-MPLLIKDMKFT-----  
-----HDGNK--THV-----N---GLVNFE-KMHMLAQTM---RTLRYCRARHLVL-D  
PPVS-KN-----EADVKSIVSC-LRCVNNERTLMSMSQK---LEPR  
>Rapgef4\_[Ailurotopoda\_melanoleuca]\_752414095  
SSKDLAYQMTIYDWELFNCVHEL----ELI-----YHTFG-RHNF--K-K-----TTA--  
-----NLDLFLRRFNEIQFWVTEICLCSQPSKRVQLLKFFIKIA-  
AHCKE-YKNLNSFFAIVMGLSNVAVSRLALTWEKLPSKFKKFYAEFESLMDPSRNHRAYR  
LTVAK--LEP-----PLIPF-MPLLIKDMTFT-----  
-----HEGNK--TFI-----D---NLVNFE-KMRMIANTA---RTVRYCRSQAFNADV  
AQAN-KN-----HQDVSRYVRQ-LNVIDNQRTLSQMSHR---LEPR  
>Rapgef4\_[Alligator\_mississippiensis]\_564252547  
SSKDLAYQMTIYDWELFNCVHEL----ELI-----YHTFG-RHHF--K-K-----TTA--  
-----NLDLFLRRFNEIQFWVTEISLCSQLSKRVQLLKYYIKIA-  
AHCKE-YKNLNSFFAIIMGLSNVAVSRLTTLTWEKLPSKFKKIYAEFESLMDPSRNHRAYR  
LTVAK--LDP-----PIIPF-MPLLIKDMTFT-----  
-----HEGNK--TFI-----D---SLVNFE-KMRMIANTI---RTVKFCRSQSFPNDA  
ALTN-KN-----HQDVSRYVRQ-LNVIDNQRTLSQMSHR---LEPR  
>Rapgef4\_[Alligator\_sinensis]\_944357962  
SSKDLAYQMTIYDWELFNCVHEL----ELI-----YHTFG-RHHF--K-K-----ITA--  
-----NLDLFLRRFNEIQFWVTEISLCSQLSKRVQLLKYYIKIA-  
AHCKE-YKNLNSFFAIIMGLSNVAVSRLTTLTWEKLPSKFKKIYAEFESLMDPSRNHRAYR  
LTVAK--LDP-----PIIPF-MPLLIKDMTFT-----  
-----HEGNK--TFI-----D---SLVNFE-KMRMIANTI---RTVKFCRSQSFPNDA  
ALTN-KN-----HQDVSRYVRQ-LNVIDNQRTLSQMSHR---LEPR  
>Rapgef4\_[Amphimedon\_queenslandica]\_761901406  
GSREIAAHLTSYDWNLFNSNIQQM----ELI-----YQVFG-RHRF---SR---I--TS--  
-----NLDVMIRRFNEVQYWTVTVEICKESNLQKRVKIIQKFIKIA-  
SHCKS-FNNLNCFFAIVVGLMNGAITRLKQTWEKVSVKLRRRYEQFEALMDPSRNHRVLR  
AYQQK--LQP-----PIIPF-MPLIVKDAFFL-----  
-----QEGNE--TFV-----D---GLVNFE-KMRMVASKV---NDFSYYRKGLSLANEI

KMLSNKN-----SELQRYIRD-FKVIDSQQVLMQMSHA---IE--  
 >Rapgef4\_[Anas\_platyrhynchos]\_874471726  
 SSKDLAHQMTIYDWELFNCVHEL----ELI-----YHTFG-RHNF--K-K-----TTA--  
 -----NLDLFLRRFNEIQFWVTEICLCSQLSKRVQLLKKYIKIA-  
 AHCKE-YKNLNSFFAIIMGLSNVAVSRLSLTWEKLPSKFKKIYAEFESLMDPSRNHRAYR  
 LTVAK--LDP-----PIIPF-MPLLIKDMTFT-----  
 -----HEGNK--TLT-----D---NLVNFE-KMRMIANTV---RTVKFCRSQSFPNDA  
 ALTN-KN-----HQDVRSYVRQ-LNVIDNQRTLSQMSHR---LEPR  
 >Rapgef4\_[Anolis\_carolinensis]\_637340171  
 SSKDLAYQMTIYEWELFNCVHEL----ELL-----YHTFG-RHSF--K-K-----TTA--  
 -----NLDLFLRRFNEIQFWVTEICLCSQLSKRVQLLKFKFIKIA-  
 AHCKE-YKNLNSFFALIMGLSNVAVSRLTMTWEKLPSKFKKIYAEFESLMDPSRNHRPYR  
 LAVAK--LEP-----PVIPIF-MPLLIKDMTFT-----  
 -----HEGNK--TFI-----D---SLVNFE-KMRMISNTV---RTVKFCRSQPFPTDA  
 SLAN-KN-----HQDVRNYVRQ-LSVIDNQRTLSQMSHR---LEPR  
 >Rapgef4\_[Anser\_cygnoides\_domesticus]\_902873590  
 SSKDLAHQMTIYDWELFNCVHEL----ELI-----YHTFG-RHNF--K-K-----TTA--  
 -----NLDLFLRRFNEIQFWVTEICLCSQLSKRVQLLKKYIKIA-  
 AHCKE-YKNLNSFFAIIMGLSNVAVSRLSLTWEKLPSKFKKIYAEFESLMDPSRNHRAYR  
 LTVAK--LDP-----PIIPF-MPLLIKDMTFT-----  
 -----HEGNK--TLT-----D---NLVNFE-KMRMIANTV---RTVKFCRSQSFPNDA  
 ALTN-KN-----HQDVRSYVRQ-LNVIDNQRTLSQMSHR---LEPR  
 >Rapgef4\_[Aotus\_nancymae]\_817294754  
 SSKDLAYQMTIYDWELFNCVHEL----ELI-----YHTFG-RHNF--K-K-----TTA--  
 -----NLDLFLRRFNEIQFWVTEICLCSQLSKRVQLLKFKFIKIA-  
 AHCKE-YKNLNSFFAIVMGLSNVAVSRLALTWEKLPSKFKKFYAEFESLMDPSRNHRAYR  
 LTVAK--LEP-----PLIPIF-MPLLIKDMTFT-----  
 -----HEGNK--TFI-----D---NLVNFE-KMHMIANTA---RTVRYRSQPFNPDA  
 AQAN-KN-----HQDVRSYVRQ-LNVIDNQRTLSQMSHR---LEPR  
 >Rapgef4\_[Apaloderma\_vittatum]\_699612544  
 SSKDLAHQMTIYDWELFNCVHEL----ELI-----YHTFG-RHNF--K-K-----TTA--  
 -----NLDLFLRRFNEIQFWVTEICLCSQLSKRVQLLKKYIKIA-  
 AHCKE-YKNLNSFFAIIMGLSNVAVSRLSLTWEKLPSKFKKIYAEFESLMDPSRNHRAYR  
 LTVAK--LDP-----PIIPF-MPLLIKDMTFT-----  
 -----HEGNK--TFT-----D---NLVNFE-KMRMIANTV---RTVKFCRSQSFPNDA  
 ALTN-KN-----HQDVRSYVRQ-LNVIDNQRTLSQMSHR---LEPR  
 >Rapgef4\_[Aptenodytes\_forsteri]\_686601170  
 -SKDLAHQMTIYDWELFNCVHEL----ELI-----YHTFG-RHNF--K-K-----TTA--  
 -----NLDLFLRRFNEIQFWVTEICLCSQLSKRVQLLKKYIKIA-  
 AHCKE-YKNLNSFFAIIMGLSNVAVSRLSLTWEKLPSKFKKIYAEFESLMDPSRNHRAYR  
 LTVAK--LDP-----PIIPF-MPLLIKDMTFT-----  
 -----HEGNK--TFT-----D---NLVNFE-KMRMIANTV---RTVKFCRSQSFPNDA  
 ALTN-KN-----HQDVRSYVRQ-LNVIDNQRTLSHMSHR---LELR  
 >Rapgef4\_[Apteryx\_australis\_mantelli]\_926533754  
 SSKDLAYQMTIYDWEFFNCVHEL----ELI-----YHTFG-RHNF--K-K-----TTA--  
 -----NLDLFLRRFNEIQFWVTEICLCSQLSKRVQLLKKYIKIA-  
 AHCKE-YKNLNSFFAIIMGLSNVAVSRLSLTWEKLPSKFKKIYAEFESLMDPSRNHRAYR  
 LTVTK--LDP-----PIIPF-MPLLIKDMTFT-----  
 -----HEGNK--TLT-----D---NLVNFE-KMRMIANTV---RTVKFCRSQSFPNDA  
 ALAN-KN-----HQDVRSYVRQ-LNVIDNQRTLSQMSHR---LEPR  
 >Rapgef4\_[Aquila\_chrysaetos\_canadensis]\_768339852  
 SSKDLAHQMTIYDWELFNCVHEL----ELI-----YHTFG-RHNF--K-K-----TTA--  
 -----NLDLFLRRFNEIQFWVTEICLCSQLSKRVQLLKKYIKIA-  
 AHCKE-YKNLNSFFAIIMGLSNVAVSRLSLTWEKLPSKFKKIYAEFESLMDPSRNHRAYR

LTVAK--LDP-----PIIPF-MPLLIKDMTFT-----  
-----HEGNK--TFT-----D---NLVNFE-KMRMIANTV---RTVKFCRSQSFPNDA  
ALTN-KN-----HQDVRSYVRQ-LNVIDNQRTLSQMSHR---LEPR  
>Rapgef4\_[Astyanax\_mexicanus]\_597745805  
SSKDLAYQLTMYDWELFNCVHEH----ELI-----YHTFG-RQHF--K-K-----TTA--  
-----NLDLFLRRFNEIQLWVVTEVCLCSALSKRVQLLKKFIKIA-  
AHCKE-FRNLNSFFSIIMGLGNPAVSRLSQTWEKLPSKFKKFYGEFENLMDPSRNRHAYR  
LTVAK--LDP-----PIIPF-MPLLIKDMTFT-----  
-----HEGNK--TFI-----D---SLVNFE-KMRMIANTV---RIMRYCRSQPFTHA  
PQAT-KN-----HQDVRSYIRQ-ISVIDNQRTLSQLSHK---LEPR  
>Rapgef4\_[Bactrocera\_cucurbitae]\_751444016  
STKEIAYQMTLFDWDLFWAVHEY----ELL-----YQTFG-RHHF--G-K-----ITA--  
-----NLDVFLRRFNEQLQFWIVTEIVSTSSMCKRVGLLRKFVKLA-  
AYCKE-YQNLNAFFAIIMGLSNMAVSRLTQTWEKVPSKFRKLFQEFEALIDPSRNRHAYR  
VYVGK--LQP-----PVIPIF-MPLLLKDMTFA-----  
-----HEGNK--TSL-----E---GLVNFE-KMHMAQTM---RTIRFCRSRSLGL-E  
PPSP-KS-----EGEVRSYISC-LRVIDNQRVLTAMSQK---IEP-  
>Rapgef4\_[Bactrocera\_dorsalis]\_751799864  
STKEIAYQMTLFDWDLFWAVHEY----ELL-----YQTFG-RHHF--G-K-----ITA--  
-----NLDVFLRRFNEQLQFWIATEIVTTSSMCKRVGLLRKFVKLA-  
AYCKE-YQNLNAFFAITMGLSNMAVRLTQTWEKIPSKFRKLFQEFEALIDPSRNRHAYR  
VYVGK--LQP-----PVIPIF-IPLLLKDMTFA-----  
-----HEGNK--TSL-----E---GLVNFE-KMHMAQTM---RTIRFCRSRSLGL-E  
PPSP-KS-----EGEVRSYISC-LRVIDNQRVLTAMSQK---IEP-  
>Rapgef4\_[Bactrocera\_oleae]\_929345093  
STKEIAYQMTLFDWDLFWAVHEY----ELL-----YQTFG-RHHF--G-K-----ITA--  
-----NLDVFLRRFNEQLQFWIATEIVTTSSMCKRVGLLRKFVKLA-  
AYCKE-YQNLNAFFAITMGLSNMAVRLTQTWEKIPSKFRKLFQEFEALIDPSRNRHAYR  
VYVGK--LQP-----PVIPIF-MPLLLKDMTFA-----  
-----HEGNK--TSL-----E---GLVNFE-KMHLMAQTM---RTIRFCRSRSLGL-E  
PPSP-KS-----EGEVRSYISC-LRVIDNQRVLTAMSQK---IEP-  
>Rapgef4\_[Balaenoptera\_acutorostrata\_scammoni]\_594670782  
SSKDLAYQMTIYDWDLFSCVHEL----ELI-----YHTFG-RHHF--K-K-----TTA--  
-----NLDLFLRRFNEIQFWVVTEICLCSQPSKRVQLLKKFIKIA-  
AHCKE-YKNLNSFFAIVMGLSNVAVSRLALTWEKLPSKFKKFYAEFESLMDPSRNRHAYR  
LTVAK--LDP-----PLIPF-MPLLIKDMTFT-----  
-----HEGNK--TFI-----D---NLVNFE-KMRMIANTA---RTVRYCRSQPFNPD  
AQAN-KN-----HQDVRSYVRQ-LNVIDNQRTLSQMSHR---LEPR  
>Rapgef4\_[Balearica\_regulorum\_gibbericeps]\_676248813  
SSKDLAHQMTIYDWELFNCVHEL----ELI-----YHIFG-RHNF--K-K-----TTA--  
-----NLDLFLRRFNEIQFWVVTEICLCSQLSKRVQLLKKYIKIA-  
AHCKE-YKNLNSFFAIVMGLSNVAVSRLSLTWEKLPSKFKKIYAEFESLMDPSRNRHAYR  
LTVAK--LDP-----PIIPF-MPLLIKDMTFT-----  
-----HEGNK--TFT-----D---NLVNFE-KM-----  
-----  
>Rapgef4\_[Bison\_bison\_bison]\_742139618  
SSKDLAYQMTIYDWELFNCVHEL----ELI-----YHTFG-RHHF--K-K-----TTA--  
-----NLDLFLRRFNEIQFWVVTEICLCSQPSKRVQLLKKFIKIA-  
AHCKE-YKNLNSFFAIVMGLSNVAVSRLALTWEKLPSKFKKFYAEFESLMDPSRNRHAYR  
LTVAK--LDP-----PLIPF-MPLLIKDMTFT-----  
-----HEGNK--TFI-----D---NLVNFE-KMRMIANTA---RTVRYCRSQPFNPD  
AQAN-KN-----HQDVRSYVRQ-LNVIDNQRTLSQMSHR---LEPR  
>Rapgef4\_[Bos\_mutus]\_555950853  
SSKDLAYQMTIYDWELFNCVHEL----ELI-----YHTFG-RHHF--K-K-----TTA--

-----NLDLFLRRFNEIQFWVTEICLCSQPSKRVQLLKKFIKIA-  
AHCKE-YKNLNSFFAIVMGLSNVAVSRLALTWEKLPSKFKKFYAEFESLMDPSRNHRAYR  
LTVAK--LDP-----PLIPF-MPLLIKDMTFT-----  
-----HEGNK--TFI-----D---NLVNFE-KMRMIANTA---RTVRYCRSQPFNPDA  
AQAN-KN-----HQDVRSYVRQ-LNVIDNQRTLSQMSHR---LEPR  
>Rapgef4\_[Bos\_taurus]\_982913240  
SSKDLAYQMTIYDWELFNCVHEL----ELI-----YHTFG-RHHF--K-K-----TTA--  
-----NLDLFLRRFNEIQFWVTEICLCSQPSKRVQLLKKFIKIA-  
AHCKE-YKNLNSFFAIVMGLSNVAVSRLALTWEKLPSKFKKFYAEFESLMDPSRNHRAYR  
LTVAK--LDP-----PLIPF-MPLLIKDMTFT-----  
-----HEGNK--TFI-----D---NLVNFE-KMRMIANTA---RTVRYCRSQPFNPDA  
AQAN-KN-----HQDVRSYVRQ-LNVIDNQRTLSQMSHR---LEPR  
>Rapgef4\_[Bubalus\_bubalis]\_594078797  
SSKDLAYQMTIYDWELFNCVHEL----ELI-----YHTFG-RHHF--K-K-----TTA--  
-----NLDLFLRRFNEIQFWVTEICLCSQPSKRVQLLKKFIKIA-  
AHCKE-YKNLNSFFAIVMGLSNVAVSRLALTWEKLPSKFKKFYAEFESLMDPSRNHRAYR  
LTVAK--LDP-----PLIPF-MPLLIKDMTFT-----  
-----HEGNK--TFI-----D---NLVNFE-KMRMIANTA---RTVRYCRSQPFNPDA  
AQAN-KN-----HQDVRSYVRQ-LNVIDNQRTLSQMSHR---LEPR  
>Rapgef4\_[Buceros\_rhinoceros\_silvestris]\_704181635  
SSKDLAHQMTIYDWELFNCVHEL----ELI-----YHTFG-RHNF--K-K-----TTA--  
-----NLDLFLRRFNEIQFWVTEICLCSQLSKRVQLLKKYIKIA-  
AHCKE-YKNLNSFFAIIMGLSNVAVSRLSLTWEKLPSKFKKIYAEFESLMDPSRNHRAYR  
LTVAK--LDP-----PIIPF-MPLLIKDMTFT-----  
-----HEGNK--TFT-----D---NLVNFE-KMRMIANTV---RTVKFCRSQSFPNPDA  
ALTS-KN-----HQDVRSYVRQ-LNVIDNQRTLSQMSHR---LEPR  
>Rapgef4\_[Callithrix\_jacchus]\_296204512  
SSKDLAYQMTIYDWELFNCVHEL----ELI-----YHTFG-RHNF--K-K-----TTA--  
-----NLDLFLRRFNEIQFWVTEICLCSQLSKRVQLLKKFIKIA-  
AHCKE-YKNLNSFFAIVMGLSNVAVSRLALTWEKLPSKFKKFYAEFESLMDPSRNHRAYR  
LTIK--LEP-----PLIPF-MPLLIKDMTFT-----  
-----HEGNK--TFI-----D---NLVNFE-KMRMIANTA---RTVRYCRSQPFNPDA  
AQAN-KN-----HQDVRSYVRQ-LNVIDNQRTLSQMSHR---LEPR  
>Rapgef4\_[Callorhinchus\_milii]\_632945698  
SSKDLAHQITIYDWELFNCVHEL----ELV-----YHTFG-RQNF--K-K-----TTA--  
-----NLDLFLRRFNEIQFWVTETCLCPQLSKRVQLLKKFIKVA-  
AHCKE-YRNLNSFFAIVMGLSNVAVSRLSQTWEKLPSKFKKIYSEFESLMDPSRNHRAYR  
LTVAK--LES-----PIIPF-MPLLIKDMTFT-----  
-----HEGNK--TFI-----D---NLVNFE-KMHMIGNTI---RTVRYCRSQSFNTD-  
SIAN-KN-----HQDVRVYVRQ-LNVIDNQRTLSQLSHR---LEPR  
>Rapgef4\_[Calypste\_anna]\_663246135  
SSKDLAHQMTIYDWELFNCVHEL----ELI-----YHTFG-RHNF--K-K-----TTA--  
-----NLDLFLRRFNEIQFWVTEICLCSQLSKRVQLLKKYIKIA-  
AHCKE-YKNLNSFFAIIMGLSNVAVSRLSLTWEKLPSKFKKIYAEFESLMDPSRNHRAYR  
LTVAK--LDP-----PVIPIF-MPLLIKDMTFT-----  
-----HEGNK--TFT-----D---NLVNFE-KMRMIANTV---RTVKFCRSQSFPNPDA  
ALTN-KN-----HQDVRSYVRQ-LNVIDNQRTLSQMSHR---LEPR  
>Rapgef4\_[Camelus\_bactrianus]\_743729785  
SSKDLAYQMTIYDWELFNCVHEL----ELI-----YHTFG-RHHF--K-K-----TTA--  
-----NLDLFLRRFNEIQFWVTEICLCSQPSKRVQLLKKFIKIA-  
AHCKE-YKNLNSFFAIVMGLSNVAVSRLALTWEKLPSKFKKFYAEFESLMDPSRNHRAYR  
LTVAK--LEP-----PLIPF-MPLLIKDMTFT-----  
-----HEGNK--TFI-----D---NLVNFE-KMRMIANTA---RMVRYCRSQPFNPDA  
AQAN-KN-----HQDVRSYVRQ-LNVIDNQRTLSQMSHR---LEPR

```

>Rapgef4_[Camelus_dromedarius]_744571846
SSKDLAYQMTIYDWELFNCVHEL----ELI-----YHTFG-RHHF--K-K-----TTA--
-----NLDLFLRRFNEIQFWVTEICLCSQPSKRVQLLKKFIKIA-
AHCKE-YKNLNSFFAIVMGLSNVAVSRLALTWEKLPSKFKKFYAEFESLMDPSRNHRAYR
LTVAK--LEP-----PLIPF-MPLLIKDMTFT-----
-----HEGNK--TFI-----D---NLVNFE-KMRMIANTA---RMVRYCRSQPFNPDA
AQAN-KN-----HQDVRSYVRQ-LNVIDNQRTLSQMSHR---LEPR
>Rapgef4_[Camelus_ferus]_560926404
SSKDLAYQMTIYDWELFNCVHEL----ELI-----YHTFG-RHHF--K-K-----TTA--
-----NLDLFLRRFNEIQFWVTEICLCSQPSKRVQLLKKFIKIA-
AHCKE-YKNLNSFFAIVMGLSNVAVSRLALTWEKLPSKFKKFYAEFESLMDPSRNHRAYR
LTVAK--LEP-----PLIPF-MPLLIKDMTFT-----
-----HEGNK--TFI-----D---NLVNFE-KMRMIANTA---RMVRYCRSQPFNPDA
AQAN-KN-----HQDVRSYVRQ-LNVIDNQRTLSQMSHR---LEPR
>Rapgef4_[Canis_lupus_familiaris]_928181558
SSKDLAYQMTIYDWELFNCVHEL----ELI-----YHTFG-RHNF--K-K-----TTA--
-----NLDLFLRRFNEIQFWVTEICLCSQPSKRVQLLKKFIKIA-
AHCKE-YKNLNSFFAIVMGLSNVAVSRLALTWEKLPSKFKKFYAEFESLMDPSRNHRAYR
LTVAK--LEP-----PLIPF-MPLLIKDMTFT-----
-----HEGNK--TFI-----D---NLVNFE-KMRMIANTA---RTVRFQRSQPFNPDA
AQAN-KN-----HQDVRSYVRQ-LNVIDNQRTLSQMSHR---LEPR
>Rapgef4_[Capra_hircus]_926684811
SSKDLAYQMTIYDWELFNCVHEL----ELI-----YHTFG-RHHF--K-K-----TTA--
-----NLDLFLRRFNEIQFWVTEICLCSQPSKRVQLLKKFIKIA-
AHCKE-YKNLNSFFAIVMGLSNVAVSRLALTWEKLPSKFKKFYAEFESLMDPSRNHRAYR
LTVAK--LDP-----PLIPF-MPLLIKDMTFT-----
-----HEGNK--TFI-----D---NLVNFE-KMRMIANTA---RTVRYCRSQPFNPDA
AQAN-KN-----HQDVRSYVRQ-LNVIDNQRTLSQMSHR---LEPR
>Rapgef4_[Caprimulgus_carolinensis]_704296106
SSKDLAHQMTIYDWELFNCVHEL----ELI-----YHTFG-RHNF--K-K-----TTA--
-----NLDLFLRRFNEIQFWVTEICLCSQLSKRVQLLKKYIKIA-
AHCKE-YKNLNSFFAIIMGLSNVAVSRLSLTWEKLPSKFKKIYAEFESLMDPSRNHRAYR
LTVAK--LDP-----PIIPF-MPLLIKDMTFT-----
-----HEGNK--TFT-----D---NLVNFE-KMRMIANTV---RTVKFCRSQSFPNPDA
ALTN-KN-----HQDVRSYVRQ-LNVIDNQRTLSQMSHR---LEPR
>Rapgef4_[Capsaspora_owczarzaki_ATCC_30864]_470294198
---DVARELTILDSQLFRDIQVQ---EYV-----EHLFK-LGIA---Q--TD-A---
-----LNKFVDRFNMINFWVNEIVMTRDVKRRVDVIKAFVAIG-
KHLRT-FKNYNSLFAIVSGLSNTASTRLKETWEKVPKRVSSESLKELEALMNPSRNMGIYR
ALLADSSA-----PMPF-FPLLIKDLVFI-----
-----HEGNP--SKV-----D---GMINFE-KLRMIARTL---RTI-----
-----
>Rapgef4_[Cariama_cristata]_698410374
SSKDLAHQMTIYDWELFNCVHEL----ELI-----YHTFG-RHNF--K-K-----TTA--
-----NLDLFLRRFNEIQFWVTEICLCSQLSKRVQLLKKYIKIA-
AHCKE-YKNLNSFFAIIMGLSNVAVSRLSLTWEKLPSKFKKIYAEFESLMDPSRNHRAYR
LTVAK--LDP-----PIIPF-MPLLIKDMTFT-----
-----HEGNK--TIT-----D---NLVNFE-KMRMIANTV---RTVKFCRSQSFPNPDA
ALTN-KN-----HQDVRSYVRQ-LNVIDNQRTLSQMSHR---LEPR
>Rapgef4_[Carlito_syricha]_640812551
SSKDLAFQMTIYDWELFNCVHEL----ELI-----YHTFG-RHNF--K-K-----TTA--
-----NLDLFLRRFNEIQFWVTEICLCSQLSKRVQLLKKFIKIA-
AHCKE-YKNLNSFFAIVMGLSNIASRLALTWEKLPSKFKKFYAEFESLMDPSRNHRAYR
LTVAK--LDP-----PLIPF-TPLLIKDMTFT-----

```



-----HEGNK--TFV-----D---NLVNFE-KMRMIANTA---RTVRYYSQPFNPDA  
AQAN-KN-----HGDVRSYVRQ-LNVIDNQRTLSQMSHR---LEPR  
>Rapgef4\_[Cathartes\_aura]\_677231281  
SSKDLAHQMTIYDWELFNCVHEL----ELI-----YHTFG-RHNF--K-K-----TTA--  
-----NLDLFLRRFNEIQFWVTEICLCSQLSKRVQLLKKYIKIA-  
AHCKE-YKNLNSFFAIIMGLSNVAVSRLSLTWEKLPSKFKKIYAEFESLMDPSRNHRAYR  
LTVAK--LDP-----PIIPF-MPLLIKDMTFT-----  
-----HEGNK--TFT-----D---NLVNFE-KMRMIANTV---RTVKFCRSQSFPNPDA  
ALTN-KN-----HGDVRSYVRQ-LNVIDNQRTLSQMSHR---LEPR  
>Rapgef4\_[Cavia\_porcellus]\_884941748  
SSKDLAYQMTIYDWELFNCVHEL----ELI-----YHTFG-RHNF--K-K-----TTA--  
-----NLDLFLRRFNEIQFWVTEICLCSQLSKRVQLLKKFIKIA-  
AHCKE-YKNLNSFFAIVMGLSNVAVSRLALTWEKLPSKFKKFYAEFESLMDPSRNHRAYR  
LTAAK--LEP-----PLIPF-MPLLIKDMTFT-----  
-----HEGNK--TFI-----D---NLVNFE-KMRMIANTA---RTVRYYSQPFSPDA  
AQAN-KN-----HGDVRSYVRQ-LNVIDNQRTLSQMSHR---LEPR  
>Rapgef4\_[Cebus\_capucinus\_imitator]\_1044377132  
SSKDLAYQMTIYDWELFNCVHEL----ELI-----YHTFG-RHNF--K-K-----TTA--  
-----NLDLFLRRFNEIQFWVTEICLCSQLSKRVQLLKKFIKIA-  
AHCKE-YKNLNSFFAIVMGLSNVAVSRLALTWEKLPSKFKKFYAEFESLMDPSRNHRAYR  
LTAAK--LEP-----PLIPF-MPLLIKDMTFT-----  
-----HEGNK--TFI-----D---NLVNFE-KMRMIANTA---RTVRYYSQPFNPDA  
AQAN-KN-----HGDVRSYVRQ-LNVIDNQRTLSQMSHR---LEPR  
>Rapgef4\_[Ceratitis\_capitata]\_499006314  
STKDLAFYITIYDWDLFVWVHEY----ELL-----YRTFG-RHHF--G-K-----ITA--  
-----NLDVFLRRFNEIQYWIIVTDIVSASSMSKRVGLLRKFIKLA-  
AYCKE-YNNLNAFFAIVMGLSNMAVSRLTQTWDKIPSKFRKLFQEFEALIDPSRNHRAYR  
VYVGK--LQP-----PLIPF-MPLLLKDMTFA-----  
-----HEGNK--TSL-----D---GLVNFE-KMHMAQTM---RTMRYCRSRTISL-D  
PPSP-KS-----EGDARSYICC-LRAIDNQRVLTAMSQK---LEP-  
>Rapgef4\_[Ceratotherium\_simum\_simum]\_478504778  
SSKDLAYQMTIYDWELFNCVHEL----ELI-----YHTFG-RHNF--K-K-----TTA--  
-----NLDLFLRRFNEIQFWVTEICLCPQPSKRVQLLKKFIKIA-  
AHCKE-YKNLNSFFAIVMGLSNVAVSRLALTWEKLPSKFKKFYAEFESLMDPSRNHRAYR  
LTVAK--LEP-----PLIPF-MPLLIKDMTFT-----  
-----HEGNK--TFI-----D---NLVNFE-KMRMIANTA---RTVRYCRSQPFNPDA  
AQAN-KN-----HGDVRSYVRQ-LNVIDNQRTLSQMSHR---LEPR  
>Rapgef4\_[Chaetura\_pelagica]\_701389410  
SSKDLAHQMTIYDWELFNCVHEL----ELI-----YHTFG-RHNF--K-K-----TTA--  
-----NLDLFLRRFNEIQFWVTEICLCSQLSKRVQLLKKYIKIA-  
AHCKE-YKNLNSFFAIIMGLSNVAVSRLSLTWEKLPSKFKKIYAEFESLMDPSRNHRAYR  
LTVAK--LDP-----PIIPF-MPLLIKDMTFT-----  
-----HEGNK--TFT-----D---NLVNFE-KMRMIANTV---RTVKFCRSQSFPNPDA  
ALTN-KN-----HGDVRSYVRQ-LNVIDNQRTLSQMSHR---LEPR  
>Rapgef4\_[Charadrius\_vociferus]\_699632744  
SSKDLAHQMTIYDWELFNCVHEL----ELI-----YHTFG-RHNF--K-K-----TTA--  
-----NLDLFLRRFNEIQFWVTEICLCSQLSKRVQLLKKYIKIA-  
AHCKE-YKNLNSFFAIIMGLSNVAVSRLSLTWEKLPSKFKKIYAEFESLMDPSRNHRAYR  
LTVAK--LDP-----PIIPF-MPLLIKDMTFT-----  
-----HEGNK--TFT-----D---NLVNFE-KMRMIANTV---RTVKFCRSQSFPNPDA  
ALTN-KN-----HGDVRSYVRQ-LNVIDNQRTLSQMSHR---LEPR  
>Rapgef4\_[Chelonia\_mydas]\_465978877  
SSKDLAYQMTIYDWELFNCVHEL----ELI-----YHTFG-THNF--K-K-----TTA--  
-----NLDLFLRRFNEIQFWVTEICLCSQLSKRVQLLKKFIKIA-

AHCKE-YKNLNSFFAIIMGLSNVAVSRLSLTWEKLPSKFKKIYAEFESLMDPSRNHRAYR  
LTVAK--LDP-----PIIPF-MPLLIKDMTFT-----  
-----HEGNK--TFI-----D---NLVNFE-KMRMIANTA---RTVKFCRSQSFPNDA  
ALTN-KN-----HQDVRTYVRQ-LNVIDNQRTLSQMSHR---LEPR  
>Rapgef4\_[Chinchilla\_lanigera]\_918612490  
SSKDLAYQMTLYDWELFNCVHEL----ELI-----YHTFG-RHNF--K-K-----TTA--  
-----NLDLFLRRFNEIQFWVTEICLCSQLSKRVQLLKKFIKIA-  
AHCKE-YKNLNSFFAIVMGLSNVAVSRLALTWEKLPSKFKKFYAEFESLMDPSRNHRAYR  
LTAAK--LEP-----PLIPF-MPLLIKDMTFT-----  
-----HEGNK--TFI-----D---NLVNFE-KMRMIANTA---RTVRYIRSQPFSPDA  
AQAN-KN-----HQDVRSYVRQ-LNVIDNQRTLSQMSHR---LEPR  
>Rapgef4\_[Chlamydotis\_macqueenii]\_705667844  
SSKDLAHQMTIYDWELFNCVHEL----ELI-----YHTFG-RHNF--K-K-----TTA--  
-----NLDLFLRRFNEIQFWVTEICLCSQLSKRVQLLKKYIKIA-  
AHCKE-YKNLNSFFAIIMGLSNVAVSRLSLTWEKLPSKFKKIYAEFESLMDPSRNHRAYR  
LTVAK--LEP-----PIIPF-MPLLIKDMTFT-----  
-----HEGNK--TFA-----D---NLVNFE-KMRMIANTV---RTVKFCRSQSFPNDA  
ALTN-KN-----HQDVRSYVRQ-LNVIDNQRTLSQMSHR---LEPR  
>Rapgef4\_[Chlorocebus\_sabaeus]\_635058803  
SSKDLAYQMTIYDWELFNCVHEL----ELI-----YHTFG-RHNF--K-K-----TTA--  
-----NLDLFLRRFNEIQFWVTEICLCSQLSKRVQLLKKFIKIA-  
AHCKE-YKNLNSFFAIVMGLSNVAVSRLALTWEKLPSKFKKFYAEFESLMDPSRNHRAYR  
LTVAK--LEP-----PLIPF-MPLLIKDMTFT-----  
-----HEGNK--TFI-----D---NLVNFE-KMRMIANTA---RTVRYIRSQPFNLDA  
AQAN-KN-----HQDVRSYVRQ-LNVIDNQRTLSQMSHR---LEPR  
>Rapgef4\_[Chrysochloris\_asiatica]\_586472254  
SSKDLAYQMTIYDWELFNCVHEL----ELI-----YHTFG-RHHF--K-K-----TTA--  
-----NLDLFLRRFNEIQFWVTEICLCSQLSKRVQLLKKFIKIA-  
AHCKE-YKNLNSFFAIVMGLSNVAVSRLALTWEKLPSKFKKFYAEFESSMDPSRNHRAYR  
LTVAK--LEP-----PLIPF-MPLLIKDMTFT-----  
-----HEGNK--TFI-----D---NLVNFE-KMRMIANTA---RTVRYCRSQPFNPDA  
AQAN-KN-----HQDVRSYVRQ-LNVIDNQRTLSQMSHR---VEPR  
>Rapgef4\_[Cimex\_lectularius]\_939265223  
SAKEMAYHMTFMDWELFVNIHEY----ELL-----YHTFG-RHRF--G-Q-----NTA--  
-----NLDVFLRRFNEIQYVWVTEICLTQSLSKRVHVLKRIKIA-  
SYCKE-FHNINGMFALVLGLSNVAVSRLSATWDKLPKSRKLYTQLEATIDPSRNHRAYR  
AVVTS--MSS-----PLIPF-MPLLLKDMTFI-----  
-----HEGNK--TMV-----D---GLVNFE-KMHMLAQTL---RTLRYCRNRHMVI-D  
PPTP-KN-----ESEVRAYVRC-LRTIDNQRTLSNHSQK---LEPR  
>Rapgef4\_[Ciona\_intestinalis]\_699251985  
-----  
-----  
---KM-YGNMFGFMAVMIGIGNQAISRLHGTWDKLPKYRKLVDDEFETILDPSRKHRNYR  
VVFVSS--TNS-----ARIPY-FPLLMKDLTFQ-----  
-----HEGND--TFNK-----N---GLVNFE-KMHMLSNSI---RLVVHGCSRSLDNQF  
FEST-KTA-----EESRNYTRE-VSVITNQILLNEMSNNK---LEPK  
>Rapgef4\_[Clupea\_harengus]\_831318321  
SSKDLAYQMTLCDWELFNCVHEL----EVV-----YHTFG-RQHF--K-K-----TTA--  
-----NLDLFLRRFNEIQLWVITEVCLCPQLSKRVQLLKKFIKIA-  
AHCKE-YRNLNSFFAIIMGMSNPAVSRLSQTWEKLPSKFKKFGFENLMDPSRNHRAYR  
LTMAK--LHP-----PIIPF-MPLLIKDMTFT-----  
-----HEGNK--TYI-----D---SLVNFE-KMRMIANTV---RILRYCRSQPFVSVA  
SQVN-KN-----HQDVRSYMHO-LNVIDNQRTLSQLSHK---LEPR  
>Rapgef4\_[Colius\_striatus]\_706115660

SSKDLAHQMTIYDWELFNCVHEL----ELI-----YHTFG-RHNF--K-K-----TTA--  
-----NLDLFLRRFNEIQFWVTEICLCSQLSKRVQLLKYYIKIA-  
AHCKE-YKNLNSFFAIIMGLSNVAVSRLSLTWEKLPSKFKKIYAEFESLMDPSRNHRAYR  
LTVAK--LDP-----PIIPF-MPLLIKDMTFT-----  
-----HEGNK--TFT-----D---NLVNFE-KMRMIANTV---RTVKFCRSQSFPNDA  
ALTN-KN-----HQDVRSYVRQ-LNVIDNQRTLSQMSHR---LEPR  
>Rapgef4\_[Colobus\_angolensis\_palliatus]\_795183856  
SSKDLAYQMTIYDWELFNCMHEL----ELI-----YHTFG-RHNF--K-K-----TTA--  
-----NLDLFLRRFNEIQFWVTEICLCSQLSKRVQLLKFKIKIA-  
AHCKE-YKNLNSFFAIVMGLSNVAVSRLALTWEKLPSKFKKFYAEFESLMDPSRNHRAYR  
LTVAK--LEP-----PLIPF-MPLLIKDMTFT-----  
-----HEGNK--TFI-----D---NLVNFE-KMRMIANTA---RTVRYIRSQPFNPDA  
AQAN-KN-----HQDVRSYVRQ-LNVIDNQRTLSQMSHR---LEPR  
>Rapgef4\_[Columba\_livia]\_449270176  
SSKDLAHQMTIYDWELFNCVHEL----ELI-----YHTFG-RHNF--K-K-----TTA--  
-----NLDLFLRRFNEIQFWVTEICLCSQLSKRVQLLKYYIKIA-  
AHCKE-YKNLNSFFAIIMGLSNVAVSRLSLTWEKLPSKFKKIYAEFESLMDPSRNHRAYR  
LTVAK--LDP-----PIIPF-MPLLIKDMTFT-----  
-----HEGNK--TFT-----D---NLVNFE-KMRMIANTV---RTVKFCRSQSFPNDA  
ALTN-KN-----HQDVRSYVRQ-LNVIDNQRTLSQMSHR---LEPR  
>Rapgef4\_[Condylura\_cristata]\_829983202  
SSKDLAYQMTIYDWELFNCVHEL----ELI-----YHTFG-RHNF--K-R-----TTA--  
-----NLDLFLRRFNEIQFWVTEICLCSQLSKRVQLLKFKIKIA-  
AHCKE-YKNLNSFFAIVMGLSNVAVSRLALTWEKLPSKFKKFYAEFESLMDPSRNHRTYR  
LTVAK--LEP-----PLIPF-MPLLIKDMTFT-----  
-----HEGNK--TFI-----D---NLVNFE-KMRMIANTA---RTVRYIRSQPFNPDA  
AQAN-KN-----HQDVRSYVRQ-LNVIDNQRTLSQMSHR---LEPR  
>Rapgef4\_[Corvus\_brachyrhynchos]\_669280989  
SSKDLAHQMTIYDWELFNCVHEL----ELI-----YHTFG-RHNF--K-K-----TTA--  
-----NLDLFLRRFNEIQFWVTEICLCSQLSKRVQLLKYYIKIA-  
AHCKE-YKNLNSFFAIIMGLSNVAVSRLSLTWEKLPSKFKKIYAEFESLMDPSRNHRAYR  
LTVAK--LDP-----PIIPF-MPLLIKDMTFT-----  
-----HEGNK--TFT-----D---NLVNFE-KMRMIANTV---RTVKFCRSQSFPNDA  
ALTN-KN-----HQDVRSYVRQ-LNVIDNQRTLSQMSHR---LEPR  
>Rapgef4\_[Corvus\_cornix\_cornix]\_727051287  
SSKDLAHQMTIYDWELFNCVHEL----ELI-----YHTFG-RHNF--K-K-----TTA--  
-----NLDLFLRRFNEIQFWVTEICLCSQLSKRVQLLKYYIKIA-  
AHCKE-YKNLNSFFAIIMGLSNVAVSRLSLTWEKLPSKFKKIYAEFESLMDPSRNHRAYR  
LTVAK--LDP-----PIIPF-MPLLIKDMTFT-----  
-----HEGNK--TFT-----D---NLVNFE-KMRMIANTV---RTVKFCRSQSFPNDA  
ALTN-KN-----HQDVRSYVRQ-LNVIDNQRTLSQMSHR---LEPR  
>Rapgef4\_[Coturnix\_japonica]\_1003923803  
SSKDLAHQMTIYDWELFNCVHEL----ELI-----YHTFG-RHNF--K-K-----TTA--  
-----NLDLFLRRFNEIQFWVTEICLCSQLSKRVQILKYYIKIA-  
AHCKE-YKNLNSFFAIIMGLSNVAVSRLSLTWEKLPSKFKKIYAEFESLMDPSRNHRAYR  
LTVAK--LDP-----PIIPF-MPLLIKDMTFT-----  
-----HEGNK--TLT-----D---NLVNFE-KMRMIANTV---RTVKFCRSQSFPNDA  
ALAN-KN-----HQDVRSYVRQ-LNVIDNQRTLSQMSHR---LEPR  
>Rapgef4\_[Crassostrea\_gigas]\_405960606  
-----ELI-----YQVLG-RSNF--N-K-----ITA--  
-----NLDLFLRRFNEVQYWVTEMVLAQNVGKRVQLLRKFIKVA-  
AHCKE-FQNLHSFFAIVMGLSNIASRLSQTWEKLPGKFKKMFADFETLMDPSRNHRVYR  
LSVSK--LTP-----PIIPF-MPLLMKDLTFT-----  
-----HDGNK--TYF-----D---GLVNFE-KMHMIAQTI---RNVRICRSRRLDLE-

PPNTAKS-----STEVQDYIRN-LQVIDNQRVLTQLSYK---LEPR  
 >Rapgef4\_[Cricetulus\_griseus]\_344239574  
 SSKDLAYQMTTYDWELFNCVHEL----ELI-----YHTFG-RHNF---K---K-TTA--  
 -----NLDLFLRRFNEIQFWVTEICLCSQLSKRVQLLKKFIKIA-  
 AHCKE-YKNLNSFFAIIMGLSNVAVSRLALTWEQ-----  
 -----  
 -----  
 >Rapgef4\_[Cynoglossus\_semilaevis]\_1035265328  
 SSKDLAYQMTMFDWELFSCVHEH----ELL-----YHTFG-RQSF--R-R-----TTA--  
 -----NLDLFLRRFNQVQLWVVTEVCLCGQLSKRVQLLKKFIKIA-  
 AHCRE-FKNLNSFFAIIMGMSNPAVSRLSQTWEKLPTKFKKFYAEFESMMDPSRNHRYSYR  
 LTVTK--LEP-----PIIPF-TPLLLKDMTFT-----  
 -----HEGNK--TFI-----D---NMVNFE-KMRMIANTI---RQVRHCRGQPFNPDI  
 CQPN-KN-----QAEVRGYVRK-LCVIDNQRALTQLSYR---LEPR  
 >Rapgef4\_[Cyprinodon\_variegatus]\_974086889  
 SSKDLAYQMTMFDWELFSCVHEH----ELL-----YHTFG-RHSF--R-R-----TTA--  
 -----NLDLFLRRFNQVQLWVVTEVCLCTQLSKRVQLLKKFIKIA-  
 AHCRE-FKNLNSFFAIIMGMSNPAVSRLSQTWEKLPTKFKKFYAEFESMM-----  
 -----  
 -----  
 >Rapgef4\_[Danio\_rerio]\_688569967  
 SSKDLAHQMTLYDWELFHCVHEH----ELI-----YHTFG-RHHF--K-K-----TTA--  
 -----NLDLFLRRFNEVQLWVVTEVCLCPALSKRVQLLKKFIKIA-  
 AHCKE-FKNLNSFFAIIMGLGNPAVCRLSQTWEKLPSKFKKFYGEFENLMDPSRNHRAYR  
 LTMAK--LEP-----PIIPF-MPLLIKDMTFT-----  
 -----HEGNK--TFT-----D---RLVNFE-KMRMIANTV---RIIRYCRSQPFDDQEA  
 PQATGKS-----HQDVRTYVRH-ISVIDNQRSLSQLSHR---LEPR  
 >Rapgef4\_[Dasypus\_novemcinctus]\_488582892  
 SSKDLAYQMTIYDWELFNCVHEM----ELI-----YHTFG-RHNF--K-K-----TTA--  
 -----NLDLFLRRFNEIQFWVTEICLCSQLSKRVQLLKKFIKIA-  
 AHCKE-YKNLNSFFAIVMGLSNVAVSRLALTWEKLPSKFKKFYAEFESLMDPSRNHRAYR  
 LTAAK--LEP-----PLIPF-MPLLIKDMTFT-----  
 -----HEGNK--TFT-----D---NLVNFE-KMRMIANTA---RTVRYCRSQPFNLDA  
 AQGN-KN-----HQDVSRYVRQ-LNVIDNQRTLSQLSHR---LEPR  
 >Rapgef4\_[Diaphorina\_citri]\_1041549174  
 SAKELAFHMTLFDWDLFWSIHEY----ELV-----YHTVG-RHRF--Q-Q-----ITA--  
 -----NLDVFLRRFNEIQYWVITEILLVTSLNKRVQILRKMIKLA-  
 AYCKE-YRNINALFAVLMGLSNVAVSRLSLTWDKLPSKSKKTYTELEALIDPSKNHRAYR  
 QAVSK--LQS-----PVIPIF-MPLLLKDLAFT-----  
 -----HDGNK--TVV-----D---GLVNFE-KMHMFAQTL---RTLRYCRTL-----  
 -----  
 >Rapgef4\_[Dipodomys\_ordii]\_852730826  
 SSKDLAYQMTIYDWELFNCVHEL----ELI-----YHTFG-RHNF--K-K-----TTA--  
 -----NLDLFLRRFNEIQFWVTEICLCSQLSKRVQLLKKFIKIA-  
 AHCKE-YKNLNSFFAIIMGLSNVAVSRLALTWEKLPSKFKKFYAEFESLMDPSRNHRAYR  
 LTAAK--LDP-----PLIPF-MPLLIKDMTFT-----  
 -----HEGNK--TFI-----D---NLVNFE-KMRMIANSA---RTVRYYSQPFNLDA  
 AQAN-KN-----HQDVSRYVRQ-LSVIDNQRTLSQMSHR---LEPR  
 >Rapgef4\_[Diuraphis\_noxia]\_985397275  
 STKELAYHMTLFDWELFWNVHEY----ELI-----YLTFG-RHRF--Q-Q-----ITA--  
 -----NLDIFLRRFNEIQYWVITEICTSQNISKRTNILKKMIKLA-  
 TYCKE-YYNFNAFFAILMGLSDVAVSRLSTTWDKLPSKSRKQFTEYETLIDPSRNHRAYR

ITVGK--LPS-----PMIPF-MPLLIKDMKFT-----  
-----HDGNK--THV-----D---GLVNFE-KMHMLAQTM---RTLRYCRARHLVL-D  
PPVS-KN-----EADVKSIVSC-LRCVNNERTLMSMSQK---LEPR  
>Rapgef4\_[Drosophila\_bipectinata]\_1037099499  
STKELAYHITLFEWDLFWAVHEY----ELL-----YHTFG-RHHF--G-K-----ITA--  
-----NLDVFLRRFNEVQYWIVTELVSTPSSLKRVGLVRKFIKLA-  
AYCKE-YQNLNAFFAVVMGLSNMAVSRLQQTWEKIPSKFRKIFQEFEALIDPSRNHRAYR  
VFVGK--LQP-----PLIPF-MPLLLKDMTFA-----  
-----HEGNK--TSL-----D---GLVNFE-KMHMQTM---RTIRFCRSRSLGL-E  
PPSP-KS-----EGEVRSYISS-FRVIDNQRVLTAMSQK---VEP-  
>Rapgef4\_[Drosophila\_eugracilis]\_1036854417  
STKELAYHITLFEWDLFWAVHEY----ELL-----YHTFG-RHHF--G-K-----ITA--  
-----NLDVFLRRFNEVQYWIVTELVSTPSSLKRVGLVRKFIKLA-  
AYCKE-YQNLNAFFAVVMGLSNMAVSRLQQTWEKIPSKFRKIFQEFEALIDPSRNHRAYR  
VFVGK--LQP-----PLIPF-MPLLLKDMTFA-----  
-----HEGNK--TSL-----D---GLVNFE-KMHMQTM---RTIRFCRSRSLGL-E  
PPSP-KS-----EGEVRSYISS-FRVIDNQRVLTAMSQK---VEP-  
>Rapgef4\_[Drosophila\_kikkawai]\_1036730969  
STKELAYHITLFEWDLFWAVHEY----ELL-----YHTFG-RHHF--G-K-----ITA--  
-----NLDVFLRRFNEVQYWIVTELVSTPSSLKRVGLVRKFIKLA-  
AYCKE-YQNLNAFFAVVMGLSNMAVTRLQQTWEKIPSKFKKIFQEFEALIDPSRNHRAYR  
VFVGK--LQP-----PLIPF-MPLLLKDMTFA-----  
-----HEGNK--TSL-----D---GLVNFE-KMHMQTM---RTIRFCRSRSLGL-E  
PPSP-KS-----EGEVRSYISS-FRVIDNQRVLTAMSQK---VEP-  
>Rapgef4\_[Drosophila\_miranda]\_1037006478  
STKELAYHITLFEWDLFYAVHEY----ELL-----YHTFG-RHHF--G-K-----ITA--  
-----NLDVFLRRFNEVQYWIVTELVSTPSSLKRVGLVRKFIKLA-  
AYCKE-YQNLNAFFAVVMGLSNMAVSRLHQQTWEKIPSKFRKIFQEFEALIDPSRNHRAYR  
VFVGK--LQP-----PLIPF-MPLLLKDMTFA-----  
-----HEGNK--TSL-----D---GLVNFE-KMHMQTM---RTIRFCRSRSLGL-E  
PPSP-KS-----EGEVRSYISS-FRVIDNQRVLTAMSQK---VEP-  
>Rapgef4\_[Drosophila\_rhopaloea]\_1036871102  
STKELAYHITLFEWDLFWAVHEY----ELL-----YHTFG-RHHF--G-K-----ITA--  
-----NLDVFLRRFNEVQYWIVTELVSTPSSLKRVGLVRKFIKLA-  
AYCKE-YQNLNAFFAVVMGXSNMAVSRLQQTWEKIPSKFRKIFQEFEALIDPSRNHRAYR  
VFVGK--LQP-----PLIPF-MPLLLKDMTFA-----  
-----HEGNK--TSL-----D---GLVNF-X-KMHMQTM---RTIRFCRSRSLGL-E  
PPSP-KS-----EGEVRSYISS-FRVIDNQRVLTAMSQK---VEP-  
>Rapgef4\_[Drosophila\_suzukii]\_1036073995  
STKELAYHITLFEWDLFWAVHEY----ELL-----YHTFG-RHHF--G-K-----ITA--  
-----NLDVFLRRFNEVQYWIVTELVSTPSSLKRVGLVRKFIKLA-  
AYCKE-YQNLNAFFAVVMGLSNMAVSRLQQTWEKIPSKFRKIFQEFEALIDPSRNHRAYR  
VFVGK--LQP-----PLIPF-MPLLLKDMTFA-----  
-----HEGNK--TSL-----D---GLVNFE-KMHMQTM---RTIRFCRSRSLGL-E  
PPSP-KS-----EGEVRSYISS-FRVIDNQRVLTAMSQK---VEP-  
>Rapgef4\_[Drosophila\_takahashii]\_1036922079  
STKELAYHITLFEWDLFWAVHEY----ELL-----YHTFG-RHHF--G-K-----ITA--  
-----NLDVFLRRFNEVQYWIVTELVSTPSSLKRVGLIRKFIKLA-  
AYCKE-YQNLNAFFAVVMGLSNMAVSRLQQTWEKIPSKFRKIFQEFEALIDPSRNHRAYR  
VFVGK--LQP-----PLIPF-MPLLLKDMTFA-----  
-----HEGNK--TSL-----D---GLVNFE-KMHMQTM---RTIRFCRSRSLGL-E  
PPSP-KS-----EGEVRTYISS-FRVIDNQRVLTAMSQK---VEP-  
>Rapgef4\_[Echinops\_telfairi]\_507650143  
SSKDLAYQMTIYDWELFHCVEL----ELI-----YHTFG-RHNF--K-K-----TTA--

-----NLDLFLRRFNEIQFWVTEVCLCSQLSKRVQLLKKFIKIA-  
AHCKE-YKNLNAFFAIVMGLSNVAVSRLALTWEKLPSKFKKFYAEFESLMDPSRNHRAYR  
LTVAK--LEA-----PLIPF-MPLLIKDMTFI-----  
-----HEGNK--TFI-----D---NLVNFE-KMRMIANTA---RTVRYCRSQPFNPDA  
AQAN-KN-----HQDVRSYVRQ-LNVIDNQRTLSQMSHR---LEPR  
>Rapgef4\_[Egretta\_garzetta]\_697837445  
SSKDLAQMTIYDWELFNCVHEL----ELI-----YHTFG-RHNF--K-K-----TTA--  
-----NLDLFLRRFNEIQFWVTEICLCSQLSKRVQLLKKYIKIA-  
AHCKE-YKNLNSFFAIVMGLSNVAVSRLSLTWEKLPSKFKKIYAEFESLMDPSRNHRAYR  
LTVAK--LDP-----PIIPF-MPLLIKDMTFT-----  
-----HEGNK--TFT-----D---NLVNFE-KMRMIANTV---RTVKFCRSQSFPNPDA  
ALTN-KN-----HQDVRSYVRQ-LNVIDNQRTLSHMSHR---LEPR  
>Rapgef4\_[Elephantulus\_edwardii]\_585637321  
SSKDLAYQMTIYDWELFNCVHEL----ELI-----YHTFG-RHNF--K-K-----TTA--  
-----NLDLFLRRFNEIQFWVTEICLCSQLSKRVQLLKKFIKIA-  
AHCKE-YKNLNSFFAIVMGLSNVAVSRLALTWEKLPSKFKKFYAEFESLMDPSRNHRAYR  
LTVAK--LEP-----PLIPF-MPLLIKDMTFT-----  
-----HEGNK--TFI-----D---NLVNFE-KMRMIANTA---RTVRYCRSQPFNPDA  
AQAN-KN-----HQDVRSYVRQ-LNVIDNQRTLSQMSHR---LEPR  
>Rapgef4\_[Eptesicus\_fuscus]\_641696747  
SSKDLAYQMTIYDWELFNCVHEL----ELI-----YHTFG-RHNF--K-K-----TTA--  
-----NLDLFLRRFNEIQFWVTEICLCSQPSKRVQLLKKFIKIA-  
AHCKE-YKNLNSFFAIVMGLSNVAVSRLALTWEKLPSKFKKFYAEFESLMDPSRNHRAYR  
LTVAK--LEP-----PLIPF-MPLLIKDMTFT-----  
-----HEGNK--TFI-----D---NLVNFE-KMRMIANTA---RTVRYCRSQPFNLDA  
AQAN-KN-----HQDVRSYVRQ-LNVIDNQRTLSQMSHR---LEPR  
>Rapgef4\_[Equus\_asinus]\_958716129  
SSKDLAYQMTIYDWELFNCVHEL----ELI-----YHTFG-RHNF--K-K-----TTA--  
-----NLDLFLRRFNEIQFWVTEICLCPQPSKRVQLLKKFIKIA-  
AHCKE-YKNLNSFFAIVMGLSNVAVSRLALTWEKLPSKFKKFYAEFESLMDPSRNHRAYR  
LTVAK--LDP-----PLIPF-MPLLIKDMTFT-----  
-----HEGNK--TFI-----D---NLVNFE-KMRMIANTA---RTVRYCRSQPFNPDA  
AQAN-KN-----HQDVRSYVRQ-LNVIDNQRTLSQMSHR---LEPR  
>Rapgef4\_[Equus\_caballus]\_953879137  
SSKDLAYQMTIYDWELFNCVHEL----ELI-----YHTFG-RHNF--K-K-----TTA--  
-----NLDLFLRRFNEIQFWVTEICLCPQPSKRVQLLKKFIKIA-  
AHCKE-YKNLNSFFAIVMGLSNVAVSRLALTWEKLPSKFKKFYAEFESLMDPSRNHRAYR  
LTIK--LDP-----PLIPF-MPLLIKDMTFT-----  
-----HEGNK--TFI-----D---NLVNFE-KMRMIANTA---RTVRYCRSQPFNPDA  
AQAN-KN-----HQDVRSYVRQ-LNVIDNQRTLSQMSHR---LEPR  
>Rapgef4\_[Erinaceus\_europaeus]\_1016663854  
SSKDLAYQMTIYDWELFNCVHEL----ELI-----YHTFG-RHNF--K-K-----TTA--  
-----NLDLFLRRFNEIQFWVTEICLCSQLSKRVQLLKKFIKIA-  
AHCKE-YKNLNSFFAIVMGLSNVAVSRLALTWEKLPSKFKKFYAEFESLMDPSRNHRAYR  
LTVAK--LEP-----PLIPF-MPLLIKDMTFT-----  
-----HEGNK--TFI-----D---NLVNFE-KMRMIANTA---RTVRYCRSQPFNQPL  
IEQS-LS-----EKSRSVILV-SNYAYNLKKIS-----  
>Rapgef4\_[Esox\_lucius]\_742138478  
SSKDLAYQMTYVDWELFHCVHEH----ELI-----YHTFG-RQNF--Q-K-----TTA--  
-----NMDLFLRRFNEIQLWVITEICLCAQLSKRVQLVKKFIKIA-  
AHCKE-YKNLNSFFAIVMGSNPAVSRLSQTWEKLPSKFRKFYSEFESLMDPSRNHRVYR  
LTVAK--LDP-----PIIPF-MPLLIKDMTFT-----  
-----HDGNK--TFT-----D---SLVNFE-KMRMIANTV---RIVRYCRSLPFSAP  
SQTS-KN-----HPDVRSYVRQ-LAVIDNQRTLSQLSQR---LEPR

```

>Rapgef4_[Eurypyga_helias]_704267608
SSKDLAHQMTVYDWELFNCVHEL----ELI-----YHTFG-RHNF--K-K-----TTA--
-----NLDLFLRRFNEIQFWVVTETICLCSQLSKRVQLLKYYIKIA-
AHCKE-YKNLNSFFAIIMGLSNVAVSRLLLTWEKLPSKFKKIYAEFESLMDPSRNHRAYR
LTVAK--LDP-----PIIPF-MPLLIKDMTFT-----
-----HEGNK--TFT-----D---NLVNFE-KMRMIANTV---RTVKFCRSQSFPNPDA
ALTS-KN-----HQDVRSYVRQ-LNVIDNQRTLSQMSHR---LEPR
>Rapgef4_[Falco_peregrinus]_909796784
SSKDLAHQMTIYDWELFNCVHEL----ELI-----YHTFG-RHNF--K-K-----TTA--
-----NLDLFLRRFNEIQFWVVTETICLCSQLSKRVQLLKYYIKIA-
AHCKE-YKNLNSFFAIIMGLSNVAVSRLSLTWEKLPSKFKKIYAEFESLMDPSRNHRAYR
LTVAK--LDP-----PIIPF-MPLLIKDMTFT-----
-----HEGNK--TFT-----D---NLVNFE-KMRMIANTV---RTVKFCRSQSFPNPDV
ALTN-KN-----HQDVRSYVRQ-LNVIDNQRTLSQMSHR---LEPR
>Rapgef4_[Felis_catus]_755759060
SSKDLAYQMTIYDWELFNCVHEL----ELI-----YHTFG-RHNF--K-K-----TTA--
-----NLDLFLRRFNEIQFWVVTETICLCSQPSKRVQLLKFFIKIA-
AHCKE-YKNLNSFFAIVMGLSNVAVSRLALTWEKLPSKFKKFYAEFESLMDPSRNHRAYR
LTVAK--LEP-----PLIPF-MPLLIKDMTFT-----
-----HEGNK--TFI-----D---NLVNFE-KMRMIANTA---RTVRYCRSQPFNPDA
AQAN-KN-----HQDVRSYVRQ-LNVIDNQRTLSQMSHR---LEPR
>Rapgef4_[Ficedula_albicollis]_525003360
SSKDLAHQMTIYDWELFNCVHEL----ELI-----YHTFG-RHNF--K-K-----TTA--
-----NLDLFLRRFNEIQFWVVTETICLCTQLSKRVQLLKYYIKIA-
AHCKE-YKNLNSFFAIIMGLSNVAVSRLSLTWEKLPSKFKKIYAEFESLMDPSRNHRAYR
LTVAK--LDP-----PIIPF-MPLLIKDMTFT-----
-----HEGNK--TFT-----D---NLVNFE-KMRMIANTV---RTVKFCRSQSFPNPDA
ALTN-KN-----HQDVRSYVRQ-LNVIDNQRTLSQMSHR---LEPR
>Rapgef4_[Fukomys_damarensis]_731272285
SSKDLAYQMTIYDWELFNCVHEL----ELI-----YHTFG-RHNF--K-K-----TTA--
-----NLDLFLRRFNEIQFWVVTETICLCSQLSKRVQLLKFFIKIA-
AHCKE-YKNLNSFFAIVMGLSNVAVSRLALTWEKLPSKFKKFYAEFESLMDPSRNHRAYR
LTAAC--LEP-----PLIPF-MPLLIKDMTFT-----
-----HEGNK--TFI-----D---NLVNFE-KMRMIANTA---RTVRYCRSQPFNPDA
AQAN-KN-----HQDVRSYVRQ-LNVIDNQRTLSQMSHR---LEPR
>Rapgef4_[Fundulus_heteroclitus]_831555062
SSKDLAYQMTMFDWELFSCVHEH----ELL-----YHTFG-RHSF--R-R-----TTA--
-----NMDLFLRRFNQVQLWVVTETVCLCTQLSKRVQLLKFFIKIA-
AHCKE-FKNLNSFFAIIMGMSNPAVSRLSQTWEKLPTKFKKFYAEFESMMDPSRNHRYSYR
LTVTK--LEP-----PIIPF-MPLLIKDMTFT-----
-----HEGNK--TFI-----D---NMVNFE-KMRI IANTI---RQVRHCRSQPFNPDI
CQPN-KN-----QADVGRGYVRK-LCVIDNQRTLSQMSHR---LEPR
>Rapgef4_[Galeopterus_variegatus]_667341846
-----
-----
-----
-----
-----KLPSKFKKFYAEFESLMDPSRNHRAYR
LTVAK--LEP-----PLIPF-MPLLIKDMTFT-----
-----HEGNK--TFT-----D---NLVNFE-KMRMIANTA---RTVRYCRSQPFNPDA
AQAN-KN-----HQDVRSYVRQ-LNVIDNQRTLSQMSHR---LEPR
>Rapgef4_[Gallus_gallus]_971405305
SSKDLAHQMTIYDWELFNCVHEL----ELI-----YHTFG-RHNF--K-K-----TTA--
-----NLDLFLRRFNEIQFWVVTETICLCSQLSKRVQLLKYYIKIA-
AHCKE-YKNLNSFFAIIMGLSNVAVSRLSLTWEKLPSKFKKIYAEFESLMDPSRNHRAYR
LTVAK--LDP-----PIIPF-MPLLIKDMTFT-----

```

-----HEGNK--TLT-----D---NLVNFE-KMRMIANTV---RTVKFCRSQSFPNDA  
ALAN-KN-----HGDVRSYVRQ-LNVIDNQRTLSQMSHR---LEPR  
>Rapgef4\_[Geospiza\_fortis]\_930230268  
SSKDLAHQMTIYDWELFNCVHEL----ELI-----YHTFG-RHNF--K-K-----TTA--  
-----NLDLFLRRFNEIQFWVTEICLCSQLSKRVQLLKKYIKIA-  
AHCKE-YKNLNSFFAIIMGLSNVAVSRLSLTWEKLPSKFKKIYAEFESLMDPSRNHRAYR  
LTVAK--LDP-----PIIPF-MPLLIKDMTFT-----  
-----HEGNK--TFT-----D---NLVNFE-KMRMIANTV---RTVKFCRSQSFPNDA  
ALTN-KN-----HGDVRSYVRQ-LNVIDNQRTLSQMSHR---LEPR  
>Rapgef4\_[Gorilla\_gorilla\_gorilla]\_426337733  
SSKDLAYQMTIYDWELFNCVHEL----ELI-----YHTFG-RHNF--K-K-----TTA--  
-----NLDLFLRRFNEIQFWVTEICLCSQLSKRVQLLKKFIKIA-  
AHCKE-YKNLNSFFAIVMGLSNVAVSRLALTWEKLPSKFKKFYAEFESLMDPSRNHRAYR  
LTVAK--LEP-----PLIPF-MPLLIKDMTFT-----  
-----HEGNK--TFI-----D---NLVNFE-KMRMIANTA---RTVRYYSQPFNPDA  
AQAN-KN-----HGDVRSYVRQ-LNVIDNQRTLSQMSHR---LEPR  
>Rapgef4\_[Haliaeetus\_albicilla]\_700359613  
SSKDLAHQMTIYDWELFNCVHEL----ELI-----YHTFG-RHNF--K-K-----TTA--  
-----NLDLFLRRFNEIQFWVTEICLCSQLSKRVQLLKKYIKIA-  
AHCKE-YKNLNSFFAIIMGLSNVAVSRLSLTWEKLPSKFKKIYAEFESLMDPSRNHRAYR  
LTVAK--LDP-----PIIPF-MPLLIKDMTFT-----  
-----HEGNK--TFT-----D---NLVNFE-KMRMIANTV---RTVKFCRSQSFPNDA  
ALTN-KN-----HGDVRSYVRQ-LNVIDNQRTLSQMSHR---LEPR  
>Rapgef4\_[Haliaeetus\_leucocephalus]\_729721426  
SSKDLAHQMTIYDWELFNCVHEL----ELI-----YHTFG-RHNF--K-K-----TTA--  
-----NLDLFLRRFNEIQFWVTEICLCSQLSKRVQLLKKYIKIA-  
AHCKE-YKNLNSFFAIIMGLSNVAVSRLSLTWEKLPSKFKKIYAEFESLMDPSRNHRAYR  
LTVAK--LDP-----PIIPF-MPLLIKDMTFT-----  
-----HEGNK--TFT-----D---NLVNFE-KMRMIANTV---RTVKFCRSQSFPNDA  
ALTN-KN-----HGDVRSYVRQ-LNVIDNQRTLSQMSHR---LEPR  
>Rapgef4\_[Halyomorpha\_halys]\_939661167  
SAKEMAYHMTMFDWELFWNIHEY----ELL-----YHTFG-RHRF--G-Q-----STA--  
-----NLDAFLRRFNEIQYVWVTEICLTQSLSKRVQVLRKIIKLA-  
AYCKQ-YHNINGMFALVLGLSNMAVSRLSLTWDKLPSKSRKLYMQLEATIDPSKNHRAYR  
GVVSS--MDS-----PLIPF-MPLLLKDMTFI-----  
-----HEGNK--TMV-----D---GLVNFE-KMHMLAQTL---RTLRYCRSRQLIIED  
PPTP-KN-----ESEVRAYVRC-LRTIDNQRTLTLSLSQK---LEPR  
>Rapgef4\_[Heterocephalus\_glaber]\_861469824  
SSKDLAYQMTIYDWELFNCVHEL----ELI-----YHTFG-RHNF--K-K-----TTA--  
-----NLDLFLKRFNEIQFWVTEICLCSQLSKRVQLLKKFIKIA-  
AHCKE-YKNLNSFFAIVMGLSNVAVSRLALTWEKLPSKFKKFYAEFESLMDPSRNHRAYR  
LTAAK--LEP-----PLIPF-MPLLIKDMTFT-----  
-----HEGNK--TFI-----D---NLVNFE-KMRMIANTA---RTVRYYSQPFNPDA  
AQAN-KN-----HGDVRSYVRQ-LNVIDNQRTLSQMSHR---LEPR  
>Rapgef4\_[Homo\_sapiens]\_62088942  
SSKDLAYQMTIYDWELFNCVHEL----ELI-----YHTFG-RHNF--K-K-----TTA--  
-----NLDLFLRRFNEIQFWVTEICLCSQLSKRVQLLKKFIKIA-  
AHCKE-YKNLNSFFAIVMGLSNVAVSRLALTWEKLPSKFKKFYAEFESLMDPSRNHRAYR  
LTVAK--LEP-----PLIPF-MPLLIKDMTFT-----  
-----HEGNK--TFI-----D---NLVNFE-KMRMIANTA---RTVRYYSQPFNPDA  
AQAN-KN-----HGDVRSYVRQ-LNVIDNQRTLSQMSHR---LEPR  
>Rapgef4\_[Ictalurus\_punctatus]\_1042363418  
SSKEVAYQMTLYEWELFNCVHEH----ELI-----YHTFG-RQHF--K-K-----ATA--  
-----NLDLFLRRFNEIQLWVTEVCLCSTLSKRVQLLKKFIKIA-



AHCKE-FRNLNSFFAIIMGLSNPAVSRLSQTWEKLPSKFKKVYVEYENLMDPSRNHRAYR  
LTVAK--LDP-----PIIPF-MPLLIKDMTFT-----  
-----HEGNK--TFV-----D---SLVNFE-KMRMIANTV---RIIRYCRSQPFNHEA  
PQAT-KN-----HGDVRLYVRQ-ISVIDNQRTLSQLSHK---LEPR  
>Rapgef4\_[Ictidomys\_tridecemlineatus]\_532077758  
SSKDLAYQMTIYDWELFNCVHEL----ELI-----YHTFG-RHNF--K-K-----TTA--  
-----NLDLFLRRFNEIQFWVTEICLCSQLSKRVQLLKKFIKIA-  
AHCKE-YRNLNSFFAIVMGLSNVAVSRLALTWEKLPSKFKKFYAEFESLMDPSRNHRAYR  
LTAAK--LEP-----PLIPF-MPLLIKDMTFT-----  
-----HEGNK--TFI-----D---NLVNFE-KMRMIANTA---RTVRYRSQPFNPDA  
AQAN-KN-----HQDVRSYVRQ-LNVIDNQRTLSQMSHR---LEPR  
>Rapgef4\_[Jaculus\_jaculus]\_507553209  
SSKDLAYQMTIYDWELFNCVHEL----ELI-----YHTFG-RHNF--K-K-----TTA--  
-----NLDLFLRRFNEIQFWVTEICLCSQLSKRVQLLKKFIKIA-  
AHCKE-YKNLNSFLAIVMGLSNVAVSRLALTWEKLPSKFKKFYAEFESLMDPSRNHRAYR  
LTAAK--LEP-----PLIPF-MPLLIKDMTFT-----  
-----HEGNK--TFI-----D---NLVNFE-KMRMIANTA---RTVRYRSEPFPNPDA  
AQAN-KN-----HQDVRSYVRQ-LNVIDNQRTLSQMSHR---LEPR  
>Rapgef4\_[Kryptolebias\_marmoratus]\_1041109010  
SSKDLAYQMTMFDWELFSCVHEH----ELL-----YHTFG-RQSF--K-R-----TTA--  
-----NLDLFLRRFNQVQLWVVTEVCLCTQLSKRVQLLKKFIKIA-  
AHCRE-FKNLNSFFAIIMGMSNPAVSRLSQTWEKLPTKFKKFYAEFESMMDPSRNHRYSYR  
LTVTK--LEP-----PIIPF-MPLLLKDMTFT-----  
-----HEGNK--TFI-----D---NMVNFE-KMRIANTI---RQVRHCRSQPFNPDI  
CQPN-KN-----QAEVRGYVRK-LCVIDNQRALTQLSYR---LEPR  
>Rapgef4\_[Larimichthys\_crocea]\_808857433  
SSKDLAYQMTLFDWELFSCVHEH----ELL-----YHTFG-RQSF--R-R-----TTA--  
-----NLDLFLRRFNQVQLWVVTEVCLCGQLSKRVQLLKKFIKIA-  
AHCRE-FKNLNSFFAIIMGMSNPAVSRLSQTWEKLPTKFKKFYAEFESMMDPSRNHRYSYR  
LTVTK--LEP-----PIIPF-MPLLLKDMTFT-----  
-----HEGNK--TFI-----D---SMVNFE-KM-----  
-----  
>Rapgef4\_[Lepisosteus\_oculatus]\_973161213  
SSKDLAYQMTVYDWELFNCVHEH----ELI-----YHTFG-RQHF--K-K-----TTA--  
-----NLDLFLRRFNEQLWVVTEICLCSQLSKRVQLLKKFIKIA-  
AHCKE-YRNLNSFFAIIMGLSNPAASRLSQTWEKLPSKFKKFYSEFESLMDPSRNHRAYR  
LTVAK--LDP-----PIIPF-MPLLMKDMTFT-----  
-----HEGNK--TFI-----D---SLVNFE-KMRMIANTV---RIVRYCRSQPFNPDA  
SLAN-KN-----HQEVRSYVRQ-LNVVDNQRTLSQLSHR---LEPR  
>Rapgef4\_[Leptonychotes\_weddellii]\_585180434  
SSKDLAYQMTIYDWELFNCVHEL----ELI-----YHTFG-RHNF--K-K-----TTA--  
-----NLDLFLRRFNEIQFWVTEICLCSQPSKRVQLLKKFIKIA-  
AHCKE-YKNLNSFFAIVMGLSNVAVSRLALTWEKLPSKFKKFYAEFESLMDPSRNHRAYR  
LTVAK--LEP-----PLIPF-MPLLIKDMTFT-----  
-----HEGNK--TFI-----D---NLVNFE-KMRMIANTA---RTVRYCRSQAFNPDA  
AQAN-KN-----HQDVRSYVRQ-LNVIDNQRTLSQMSHR---LEPR  
>Rapgef4\_[Leptosomus\_discolor]\_700415867  
SSKDLAYQMTIYDWELFNCVHEL----ELV-----YHTFG-RHNF--K-K-----TTA--  
-----NLDLFLRRFNEIQFWVTEICLCSQLSKRVQLLKKYIKIA-  
AHCKE-YKNLNSFFAIIMGLSNVAVSRLSLTWEKLPSKFKKIYAEFESLMDPSRNHRAYR  
LTVAK--LDP-----PIIPF-MPLLIKDMTFT-----  
-----HEGNK--TFT-----D---NLVNFE-KMRMIANTV---RTVKFCRSQSFPNPDA  
ALTN-KN-----HQDVRSYVRQ-LNVIDNQRTLSQMSHR---LEPR  
>Rapgef4\_[Limulus\_polyphemus]\_926607017

SSHDLAHQMSLYDWELFNAIHEY----ELI-----YQVFG-RHQF--R-K-----SMS--  
 -----NLDMLRRFNVLQFWVTELCCLASSLRRVQLLRKFIKVA-  
 AYCGRG-YQNLNAFYAIVMGLSNVAVNRMSLTWERLPGKLRKMYADFEALIDPSRNHRRYR  
 IFVAK--MAP-----PIIPF-MPLLLKDMTFS-----  
 -----HEGNK--TYL-----E---GLVNFE-KMHMIAQTL---RTLRYCRSQALVLEA  
 PPMS-KV-----QQEVREYIRN-IRVIDNQRRRLTQLSSS---LEPR  
 >Rapgef4\_[Lingula\_anatina]\_919011590  
 GSKDIAYHLTMYDWELLNTMHEY----EMI-----YLIFG-RSKF--Q-R-----ISA--  
 -----NFDRLFQRFNVVQYWVLTEMCLTPNLGKRVQMLKKFIKIA-  
 EYCLE-YQNLNSFFAIVMGLSNLAVSRLSQTWEKLPSKMKKLFSDFESMMDPSRNHRVYR  
 LTVAK--MDA-----PFIPF-MPLLMKDLTFT-----  
 -----HDGNK--SYF-----D---GLVNFE-KMHMVALTM---RSIKFCRSKPLEVEP  
 PTVG-KN-----AQDVKNYVRN-IRVIDNQRIILTRLSQR---LEPR  
 >Rapgef4\_[Lipotes\_vexillifer]\_602693655  
 SSKDLAYQMTIYDWDLFSCVHEL----ELI-----YHTFG-RHHF--K-K-----TTA--  
 -----NLDLFLRRFNEIQFWVTEICLCSQPSKRVQLLKKFIKIA-  
 AHCKE-YKNLNSFFAIVMGLSNVAVSRLALTWEKLPSKFKKFYAEFESLMDPSRNHRAYR  
 LTVAK--LDP-----PLIPF-MPLLIKDMTFT-----  
 -----HEGNK--TFI-----D---NLVNFE-KMRMIANTA---RTVRYCRSQPFNPDA  
 AQAN-KN-----HQDVSRYVRQ-LNVIDNQRTLSQMSHR---LEPR  
 >Rapgef4\_[Loxodonta\_africana]\_731458749  
 SSKDLAYQMTIYDWELFNCVHEL----ELI-----YHTFG-RHNF--K-K-----TTA--  
 -----NLDLFLRRFNEIQFWVTEICLCSQLSKRVQLLKKFIKIA-  
 AHCKE-YKNLNSFFAIVMGLSNVAVSRLALTWEKLPSKFKKFYAEFESLMDPSRNHRAYR  
 LTVAK--LEP-----PLIPF-MPLLIKDMTFT-----  
 -----HEGNK--TFT-----D---NLVNFE-KMRMIANTA---RTVRYCRSQPFNPDA  
 AQAN-KN-----HQDVSRYVRQ-LNVIDNQRTLSQMSHR---LEPR  
 >Rapgef4\_[Macaca\_fascicularis]\_544475839  
 SSKDLAYQMTIYDWELFNCVHEL----ELI-----YHTFG-RHNF--K-K-----TTA--  
 -----NLDLFLRRFNEIQFWVTEICLCSQLSKRVQLLKKFIKIA-  
 AHCKE-YKNLNSFFAIVMGLSNVAVSRLALTWEKLPSKFKKFYAEFESLMDPSRNHRAYR  
 LTVAK--LEP-----PLIPF-MPLLIKDMTFT-----  
 -----HEGNK--TFI-----D---NLVNFE-KMRMIANTA---RTVRYCRSQPFNPDA  
 AQAN-KN-----HQDVSRYVRQ-LNVIDNQRTLSQMSHR---LEPR  
 >Rapgef4\_[Macaca\_nemestrina]\_795659619  
 SSKDLAYQMTIYDWELFNCVHEL----ELI-----YHTFG-RHNF--K-K-----TTA--  
 -----NLDLFLRRFNEIQFWVTEICLCSQLSKRVQLLKKFIKIA-  
 AHCKE-YKNLNSFFAIVMGLSNVAVSRLALTWEKLPSKFKKFYAEFESLMDPSRNHRAYR  
 LTVAK--LEP-----PLIPF-MPLLIKDMTFT-----  
 -----HEGNK--TFI-----D---NLVNFE-KMRMIANTA---RTVRYCRSQPFNPDA  
 AQAN-KN-----HQDVSRYVRQ-LNVIDNQRTLSQMSHR---LEPR  
 >Rapgef4\_[Manacus\_vitellinus]\_675430506  
 SSKDLAHQMTIYDWELFNCVHEL----ELI-----YHTFG-RHNF--K-K-----TTA--  
 -----NLDLFLRRFNEIQFWVTEICLCSQLSKRVQLLKKYIKIA-  
 AHCKE-YKNLNSFFAIVMGLSNVAVSRLSLTWEKLPSKFKKIYAEFESLMDPSRNHRAYR  
 LTVAK--LDP-----PIIPF-MPLLIKDMTFT-----  
 -----HEGNK--TFT-----D---NLVNFE-KMRMIANTV---RTVKFCRSQSFPNPDA  
 ALAN-KN-----HQDVSRYVRQ-LNVIDNQRTLSQMSHR---LEPR  
 >Rapgef4\_[Mandrillus\_leucophaeus]\_795195949  
 SSKDLAYQMTIYDWELFNCVHEL----ELI-----YHTFG-RHNF--K-K-----TTA--  
 -----NLDLFLRRFNEIQFWVTEICLCSQLSKRVQLLKKFIKIA-  
 AHCKE-YKNLNSFFAIVMGLSNVAVSRLALTWEKLPSKFKKFYAEFESLMDPSRNHRAYR  
 LTVAK--LEP-----PLIPF-MPLLIKDMTFT-----  
 -----HEGNK--TFI-----D---NLVNFE-KMRMIANTA---RTVRYCRSQPFNPDA

AQAN-KN-----HQDVRSYVRQ-LNVIDNQRTLSQMSHR---LEPR  
 >Rapgef4\_[Marmota\_marmota\_marmota]\_984087885  
 SSKDLAYQMTIYDWELFNCVHEL----ELI-----YHTFG-RHNF--K-K-----TTA--  
 -----NLDLFLRRFNEIQFWVTEICLCSQLSKRVQLLKKFIKIA-  
 AHCKE-YRNLNSFFAIVMGLSNVAVSRLALTWEKLPSKFKKFYAEFESLMDPSRNHRAYR  
 LTAAK--LEP-----PLIPF-MPLLIKDMTFT-----  
 -----HEGNK--TFI-----D---NLVNFE-KMRMIANTA---RTVRYRSQPFNPDA  
 AQAN-KN-----HQDVRSYVRQ-LNVIDNQRTLSQMSHR---LEPR  
 >Rapgef4\_[Maylandia\_zebra]\_835878367  
 SSKDLAYQMTMFDWELFSCVHEH----ELL-----YHTFG-CQSF--K-R-----TTA--  
 -----NLDLFLRRFNQVQLWVVTEVCLCGQLSKRVQLLKKFIKIA-  
 AHCRE-FKNLNSFFAIIMGMSNPAVSRLSQTWEKLPTKFKKFYAEFENMDPSRNHRYSYR  
 LTVTK--LEP-----PIIPF-VPLLLKDMTFT-----  
 -----HEGNK--TFI-----D---NMVNFE-KMRIANTTI---RQVRHCRSQPFNPDI  
 CQPN-KN-----QAEVRAYVRK-LCVIDNQRTLSQMSHR---LEPR  
 >Rapgef4\_[Melopsittacus\_undulatus]\_884829617  
 SSKDLAHQMTIYDWELFNCVHEL----ELI-----YHTFG-RHNF--K-K-----TTA--  
 -----NLDLFLRRFNEIQFWVTEICLCAQLSKRVQLLKKYIKIA-  
 AHCKE-YKNLNSFFAIIMGLSNVAVSRLSLTWEKLPSKFKKIYAEFESLMDPSRNHRAYR  
 LTVAK--LDP-----PIIPF-MPLLIKDMTFT-----  
 -----HEGNK--TFT-----D---NLVNFE-KMRMIANTV---RTVKFCRSQSFPNPDA  
 ALTN-KN-----HQDVRSYVRQ-LNVIDNQRTLSQMSHR---LEPR  
 >Rapgef4\_[Merops\_nubicus]\_675626707  
 SSKDLAHQMTIYDWELFNCVHEL----ELI-----YHTFG-RHNF--K-K-----TTA--  
 -----NLDLFLRRFNEIQFWVTEICLCSQLSKRVQLLKKYIKIA-  
 AHCKE-YKNLNSFFAIIMGLSNVAVSRLSLTWEKLPSKFKKIYAEFESLMDPSRNHRAYR  
 LTVAK--LDP-----PIIPF-MPLLIKDMTFT-----  
 -----HEGNK--TFT-----D---NLVNFE-KMRMIANTV---RTVKFCRSQSFPNPDT  
 ALAN-KN-----HQDVRSYVRQ-LNVIDNQRTLSQMSHR---LEPR  
 >Rapgef4\_[Mesitornis\_unicolor]\_704578686  
 SSKDLAHQMTIYDWELFNCVHEL----ELI-----YHTFG-RHNF--K-K-----TTA--  
 -----NLDLFLRRFNEIQFWVTEICLCSQLSKRVQLLKKYIKIA-  
 AHCKE-YKNLNSFFAIIMGLSNVAVSRLSLTWEKLPSKFKKIYAEFESLMDPSRNHRAYR  
 LTVAK--LDP-----PIIPF-MPLLIKDMTFT-----  
 -----HEGNK--TFT-----D---NLVNFE-KMRMIANTV---RTVKFCRSQSFPNPDA  
 ALTN-KN-----HQDVRSYVRQ-LNVIDNQRTLSQMSHR---LEPR  
 >Rapgef4\_[Mesocricetus\_auratus]\_880859282  
 SSKDLAYQMTTYDWELFNCVHEL----ELI-----YHTFG-RHNF--K-K-----TTA--  
 -----NLDLFLRRFNEIQFWVTEICLCSQLSKRVQLLKKFIKIA-  
 AHCKE-YKNLNSFFAIVMGLSNVAVSRLALTWEKLPSKFKKFYAEFESLMDPSRNHRAYR  
 LTAAK--LDP-----PLIPF-MPLLIKDMTFT-----  
 -----HEGNK--TFI-----D---NLVNFE-KMRMIANTA---RTVRYCRSQPFNPDA  
 AQAN-KN-----HQDVRSYVRQ-LNVIDNQRTLSQMSHR---LEPR  
 >Rapgef4\_[Metaseiulus\_occidentalis]\_391334871  
 SSQDIAYHMTVYEWQLFTTVHEY----ELI-----YQVFG-RNQF--R-R-----IMS--  
 -----NLDVFQRRFNQVQFWVTEMCLANSLSRVTLRLKFIKIA-  
 QHCRE-YQNLNALFAIVMGLGNAAVSRLGQTWERLPSKLRRSFEELNLIEPSRNHKRYR  
 NAVAK--LQP-----PLIPF-IPLLLKDMTFC-----  
 -----HVGNK--SYI-----D---GLVNFE-KMHMIGQTL---RHLRHSRSQRLAMEP  
 PQGSSKS-----HHNVADYIRN-LKVIDNQRTLTCLSHQ---LEPR  
 >Rapgef4\_[Microcebus\_murinus]\_829851297  
 SSKDLAYQMTLYDWELFNCVHEL----ELI-----YHTFG-RHNF--K-K-----TTA--  
 -----NLDLFLRRFNEIQFWVTEICLCSQLSKRVQLLKKFIKIA-  
 AHCKE-YKNLNSFFAIVMGLSNVAVSRLALTWEKLPSKFKKFYAEFESLMDPSRNHRAYR

LTVAK--LEP-----PLIPF-MPLLIKDMTFT-----  
-----HEGNK--TFI-----D---NLVNFE-KMRMITNTA---RTVRYYSQPFNPDA  
AQAN-KN-----HGDVRSYVRQ-LNVIDNQRTLSQMSHR---LEPR  
>Rapgef4\_[Microtus\_ochrogaster]\_913490049  
SSKDLAYQMTTYDWELFNCVHEL----ELI-----YHTFG-RHNF--K-K-----TTA--  
-----NLDLFLRRFNEIQFWVTEICLCSQLSKRVQLLKKFIKIA-  
AHCKE-YKNLNSFFAIVMGLSNVAVSRLALTWEKLPSKFKKFYAEFESLMDPSRNRHAYR  
LTAAK--LDP-----PIIPF-MPLLIKDMTFT-----  
-----HEGNK--TFI-----D---NLVNFE-KMRMIANTA---RTVRYYSQPFNPDA  
AQAN-KN-----HGDVRSYVRQ-LNVIDNQRTLSQMSHR---LEPR  
>Rapgef4\_[Miniopterus\_natalensis]\_1016626283  
SSKDLAYQMTIYDWELFNCVHEL----ELI-----YHTFG-RHNF--K-K-----TTA--  
-----NLDLFLRRFNEIQFWVTEICLCSQPSKRVQLLKKFIKIA-  
AHCKE-YKNLNSFFAIVMGLSNVAVSRLALTWEKLPSKFKKFYAEFESLMDPSRNRHAYR  
LTVAK--LEP-----PLIPF-MPLLIKDMTFT-----  
-----HEGNK--TFI-----D---NLVNFE-KMRMIANTA---RMVRYCRSQPFNLDA  
AQAN-KN-----HGDVRSYVRQ-LNVIDNQRTLSQMSHR---LEPR  
>Rapgef4\_[Monodelphis\_domestica]\_612019668  
SSKDLAYQMTIYDWELFNCVHEL----ELI-----YHTFG-RHNF--K-K-----TTA--  
-----NLDLFLRRFNEIQFWVTEICLCAQLSKRVQLLKKFIKIA-  
AHCKE-YKNLNSFFAIVMGLSNVAVSRLALTWEKLPSKFKKIYAEFESLMDPSRNRHAYR  
LTVTK--LDP-----PLIPF-MPLLIKDMTFT-----  
-----HEGNK--TFI-----D---NLVNFE-KMRMIANTV---RTVRYCRSQTFNPDA  
ALAN-KN-----HGDVRGYVRQ-LNVIDNQRTLSQMSHR---LEPR  
>Rapgef4\_[Mus\_musculus]\_568917895  
SSKDLAYQMTTYDWELFNCVHEL----ELI-----YHTFG-RHNF--K-K-----TTA--  
-----NLDLFLRRFNEIQFWVTEVCLCSQLSKRVQLLKKFIKIA-  
AHCKE-YKNLNSFFAIVMGLSNVAVSRLALTWEKLPSKFKKFYAEFESLMDPSRNRHAYR  
LTAAK--LEP-----PLIPF-MPLLIKDMTFT-----  
-----HEGNK--TFI-----D---NLVNFE-KMRMIANTA---RTVRYYSQPFNPDA  
AQAN-KN-----HGDVRSYVRQ-LNVIDNQRTLSQMSHR---LEPR  
>Rapgef4\_[Musca\_domestica]\_557781733  
STKELAYHITIFDWDLFWAVHEY----ELL-----YHTFG-RHHF--G-K-----ITA--  
-----NLDVFLRRFNEIQYWIIVTEMVSTSSMSKRVGLLRKFIKLA-  
AYCKE-YQNLNAFFAIVMGLSNMAVSRLQQTWEKIPSKFRKLYQEFREALIDPSRNRHAYR  
VFVGK--LQP-----PLIPF-MPLLLKDMTFA-----  
-----HEGNK--TSI-----D---GLVNFE-KMHMAQTM---RTLRFCSRSLGL-D  
PPSP-KS-----EGEVSFISC-LRVIDNQRVLTAMSQK---IEP-  
>Rapgef4\_[Mustela\_putorius\_furo]\_511839232  
SSKDLAYQMTIYDWELFNCVHEL----ELI-----YHTFG-RHNF--K-K-----TTA--  
-----NLDLFLRRFNEIQFWVTEICLCSQPSKRVQLLKKFIKIA-  
AHCKE-YKNLNSFFAIVMGLSNVAVSRLALTWEKLPSKFKKFYAEFESLMDPSRNRHAYR  
LTVAK--LEP-----PLIPF-MPLLIKDMTFT-----  
-----HEGNK--TFI-----D---NLVNFE-KMRMIANTA---RTVRYCRSQAFNPDA  
AQAS-KN-----HGDVRSYVRQ-LNVIDNQRTLSQMSHR---LEPR  
>Rapgef4\_[Myotis\_brandtii]\_554525590  
SSKDLAYQMTIYDWELFNCVHEL----ELI-----YHTFG-RHNF--K-K-----TTA--  
-----NLDLFLRRFNEIQFWVTEICLCSQPSKRVQLLKKFIKIA-  
AHCKE-YKNLNSFFAIVMGLSNVAVSRLALTWEKLPSKFKKFYAEFESLMDPSRNRHAYR  
LTVAK--LEP-----PLIPF-MPLLIKDMTFT-----  
-----HEGNK--TFI-----D---NLVNFE-KMRMIANTA---RTVRYCRSQAFNLDA  
AQAN-KN-----HGDVRSYVRQ-LNVIDNQRTLSQMSHR---LEPR  
>Rapgef4\_[Myotis\_davidii]\_584081689  
SSKDLAYQMTIYDWELFNCVHEL----ELI-----YHTFG-RHNF--K-K-----TTA--

-----NLDLFLRRFNEIQFWVTEICLCSQPSKRVQLLKKFIKIA-  
AHCKE-YKNLNSFFAIVMGLSNVAVSRLALTWEKLPSKFKKFYAEFESLMDPSRNHRAYR  
LTVAK--LEP-----PLIPF-MPLLIKDMTFT-----  
-----HEGNK--TFI-----D---NLVNFE-KMRMIANTA---RTVRYCRSQPFNLDA  
AQAN-KN-----HQDVRSYVRQ-LNVIDNQRTLSQMSHR---LEPR  
>Rapgef4\_[Myotis\_lucifugus]\_558101259  
SSKDLAYQMTIYDWELFNCVHEL----ELI-----YHTFG-RHNF--K-K-----TTA--  
-----NLDLFLRRFNEIQFWVTEICLCSQPSKRVQLLKKFIKIA-  
AHCKE-YKNLNSFFAIVMGLSNVAVSRLALTWEKLPSKFKKFYAEFESLMDPSRNHRAYR  
LTVAK--LEP-----PLIPF-MPLLIKDMTFT-----  
-----HEGNK--TFI-----D---NLVNFE-KMRMIANTA---RTVRYCRSQPFNLDA  
AQAN-KN-----HQDVRSYVRQ-LNVIDNQRTLSQMSHR---LEPR  
>Rapgef4\_[Neolamprologus\_brichardi]\_583982938  
SSKDLAYQMTMFDWELFSCVHEH----ELL-----YHTFG-CQSF--K-R-----TTA--  
-----NLDLFLRRFNQVQLWVVTEVCLCGQLSKRVQLLKKFIKIA-  
AHCRE-FKNLNSFFAIIMGMSNPAVSRLSQTWEKLPTKFKKFYAEFENMMDPSRNHRYSYR  
LTVTK--LEP-----PIIPF-VPLLLKDMTFT-----  
-----HEGNK--TFI-----D---NMVNFE-KMRIANTI---RQVRHCRSQPFNPDI  
CQPN-KN-----QAEVRGYVRK-LCVIDNQRALTQLSYR---LEPR  
>Rapgef4\_[Nestor\_notabilis]\_701300283  
SSKDLAHQMTIYDWELFNCVHEL----ELI-----YHTFG-RHNF--K-K-----TTA--  
-----NLDLFLRRFNEIQFWVTEICLCSQLSKRVQLLKKYIKIA-  
AHCKE-YKNLNSFFAIVMGLSNVAVSRLSLTWEKLPSKFKKIYAEFESLMDPSRNHRAYR  
LTVAK--LDP-----PIIPF-MPLLIKDMTFT-----  
-----HEGNK--TFT-----D---NLVNFE-KMRMIANTV---RTVKFCRSQSFPNDA  
ALTN-KN-----HQDVRSYVRQ-LNVIDNQRTLSQMSHR---LEPR  
>Rapgef4\_[Nomascus\_leucogenys]\_821032839  
SSKDLAYQMTIYDWELFNCVHEL----ELI-----YHTFG-RHNF--K-K-----TTA--  
-----NLDLFLRRFNEIQFWVTEICLCSQLSKRVQLLKKFIKIA-  
AHCKE-YKNLNSFFAIVMGLSNVAVSRLALTWEKLPSKFKKFYAEFESLMVSDRNHRAYR  
LTVAK--LEP-----PLIPF-MPLLIKDMTFT-----  
-----HEGNK--TFI-----D---NLVNFE-KMRMIANTA---RTVRYCRSQPFNPDA  
AQAN-KN-----HQDVRSYVRQ-LNVIDNQRTLSQMSHR---LEPR  
>Rapgef4\_[Nothobranchius\_furzeri]\_1007745272  
SSKDLAYQMTMYDWELFSCVHEH----ELL-----YHTFG-RQSF--K-R-----TTA--  
-----NLDLFLRRFNQVQLWVVTEVCLCTQLSKRVQLLKKFIKIA-  
AHCRE-FKNLNSFFAIIMGMSNPAVSRLSQTWEKLPTKFKKFYAEFESMMDPSRNHWSYR  
LTVTK--LEA-----PIIPF-MPLLLKDMTFT-----  
-----HEGNK--TFI-----D---NMVNFE-KMRIANTI---RQVRNCRSQPFNPDI  
CQPN-KN-----QAEVRGYVRK-LCVIDNQRALTQLSYR---LEPR  
>Rapgef4\_[Notothenia\_coriiceps]\_736226861  
SSKDLAYQMTMFDWELFSCVHEH----ELL-----YHTFG-RQSF--R-R-----TTA--  
-----NLDLFLRRFNQVQLWVVTEVCLCSQLSKRVQLLKKFIKIA-  
AHCRE-FKNLNSFFAIVMGLSNVAVSRLSQTWEKLPTKFKKFYAEFESMMDPSRNHRYSYR  
LTVTK--LEP-----PIIPF-MPLLLKDMTFT-----  
-----HEGNK--TFI-----D---NMVNFE-KMRIANAI---RQVRHCRSQPFNPDI  
CQPN-KN-----QAEVRGYVRK-LCVIDNQRALTQLSYR---LEPR  
>Rapgef4\_[Ochotona\_princeps]\_504128086  
SSKDLAYQMTIYDWELFNCVHEL----ELI-----YHTFG-RHHF--K-K-----TTA--  
-----NLDLFLRRFNEIQFWVTEICLCSQLSKRVQLLKKFIKIA-  
AHCKE-YKNLNSFFAIVMGLSNVAVSRLALTWEKLPSKFKKFYAEFESLMDPSRNHRAYR  
LTVAK--LEA-----PLIPF-MPLLIKDMTFT-----  
-----HEGNK--TFT-----D---NLVNFE-KMRMIANTA---RTVRYCRSQPFNPDI  
AQAN-KN-----HQDVRSYVRQ-LNVIDNQRTLSQMSHR---LEPR

>Rapgef4\_[Octodon\_degus]\_507658538  
SSKDLAYQMTIYDWELFNCVHEL----ELI-----YHTFG-RHNF--K-K-----TTA--  
-----NLDLFLRRFNEIQFWVTEICLCSQLSKRVQLLKKFIKIA-  
AHCKE-YKNLNSFFAIVMGLSNVAVSRLALTWEKLPSKFKKFYAEFESLMDPSRNHRAYR  
LTAAK--LEP-----PLIPF-MPLLIKDMTFT-----  
-----HEGNK--TFI-----D---NLVNFE-KMRMIANTA---RTVRYRSQPFSPDA  
AQAN-KN-----HQDVRSYVRQ-LNVIDNQRTLSQMSHR---LEPR

>Rapgef4\_[Octopus\_bimaculoides]\_961078509  
GSQELAYHMTIYDWELFTSVPEY----ELI-----YQVFG-RYKF--A-K-----MTA--  
-----NLDLFLRRFNEVQYWVTEILLTQNLNKRVLHLLRKFIKIA-  
SYCKE-YQNMSFFAIVLGLSNIASRLSQTWEKLPGKLKMFSEFETIMDPSRNHRVYR  
LSISK--MRP-----PIIPF-MPLMMKDMTFT-----  
-----HEGNK--TYT-----D---GLVNFE-KMHMIAQTL---RTVRCCRSMPNLNDI  
PSSSVKP-----PFEVKAYVRN-LCVMDNQRTLTQLSHK---LEPR

>Rapgef4\_[Odobenus\_rosmarus\_divergens]\_823421495  
SSKDLAYQMTIYDWELFNCVHEL----ELI-----YHTFG-RHNF--K-K-----TTA--  
-----NLDLFLRRFNEIQFWVTEICLCSQPSKRVQLLKKFIKIA-  
AHCKE-YKNLNSFFAIVMGLSNVAVSRLALTWEKLPSKFKKFYAEFESLMDPSRNHRAYR  
LTVAK--LEP-----PLIPF-MPLLIKDMTFT-----  
-----HEGNK--TFI-----D---NLVNFE-KMRMIANTA---RTVRYCRSQAFNPDA  
AQAN-KN-----HQDVRSYVRQ-LNVIDNQRTLSQMSHR---LEPR

>Rapgef4\_[Opisthocomus\_hoazin]\_700384686  
SSKDLAHQMTVYDWELFNCVHEL----ELI-----YHTFG-RHNF--K-K-----TTA--  
-----NLDLFLRRFNEIQFWVTEICLCSQLSKRVQLLKKYIKIA-  
AHCKE-YKNLNSFFAIIMGLSNVAVSRLSLTWEKLPSKFKKIYAEFESSMDPSRNHRAYR  
LTVAK--LDP-----PIIPF-MPLLIKDMTFT-----  
-----HEGNK--TFT-----D---NLVNFE-KMRMIANTV---RTVKFCRSQSFPNPDA  
ALTN-KN-----HQDVRSYVRQ-LNVIDNQRTLSQMSHR---LEPR

>Rapgef4\_[Orcinus\_orca]\_465994873  
SSKDLAYQMTVYDWDWDLFSCVHEL----ELI-----YHTFG-RHHF--K-K-----TTA--  
-----NLDLFLRRFNEIQFWVTEICLCSQPSKRVQLLKKFIKIA-  
AHCKE-YKNLNSFFAIVMGLSNVAVSRLALTWEKLPSKFKKFYAEFESLMDPSRNHRAYR  
LTVAK--LDP-----PLIPF-MPLLIKDMTFT-----  
-----HEGNK--TFI-----D---NLVNFE-KMRMIANTA---RTVRYCRSQPFNPDA  
AQAN-KN-----HQDVRSYVRQ-LNVIDNQRTLSQMSHR---LEPR

>Rapgef4\_[Oreochromis\_niloticus]\_542205128  
SSKDLAYQMTMFDWELFSCVHEH----ELL-----YHTFG-RQSF--K-R-----TTA--  
-----NLDLFLRRFNQVQLWVTEVCLCGQLSKRVQLLKKFIKIA-  
AHCRE-FKNLNSFFAIIMGMSNPAVSRLSQTWEKLPTKFKKFYAEFENMMDPSRNHRYSYR  
LTVTK--LEP-----PIIPF-VPLLLKDMTFT-----  
-----HEGNK--TFI-----D---NMVNFE-KMRI IANTI---RQVRHCRSQPFNPDI  
CQPN-KN-----QAEVRGYVRK-LCVIDNQRALTQLSYR---LEPR

>Rapgef4\_[Ornithorhynchus\_anatinus]\_620978658  
SSKDLAYQMTIYDWELFNCVHEL----ELI-----YNTFG-RHNF--K-K-----TTA--  
-----NLDLFLRRFNEIQFWVTEICLCSQLSKRVQLLKKFTKIA-  
AHCKE-YKNLNSFFAIVMGLSNVAVSRLTLTWEKLPSKFKKIYAEFENLMDPSRNHRAYR  
LTIK--LDP-----PLIPF-MPLLIKDMTFT-----  
-----HEGNK--TFI-----D---NLVNFE-KMRMIANTA---RTVRYCRSQPFNPDA  
ALAN-KN-----HQDVRSYVRQ-LNVIDNQRTLSQMSHR---LEPR

>Rapgef4\_[Orycteropus\_afer\_afer]\_634820951  
SSKDLAYQMTIYDWELFHCVHEL----ELI-----YHTFG-RHNF--K-K-----TTA--  
-----NLDLFLRRFNEIQFWVTEICLCSQLSKRVQLLKKFIKIA-  
AHCKE-YKNLNSFLAIVMGLSNVAVSRLALTWEKLPSKFKKFYAEFESLMDPSRNHRAYR  
LTVAK--LDP-----PLIPF-MPLLIKDMTFT-----

-----HEGNK--TFI-----D---NLVNFE-KMRMIANTA---RTVRYCRSQPFNPDA  
TQAN-KN-----HGDVRSYVRQ-LNVIDNQRTLSQMSHR---LEPR  
>Rapgef4\_[Oryctolagus\_cuniculus]\_655828001  
SSKDLAYQMTIYDWELFNCVHEL----ELI-----YHTFG-RHNF--K-K-----TTA--  
-----NLDLFLRRFNEIQFWVITEICLCSQLSKRVQLLKKFIKIA-  
AHCKE-YRNLNSFFAIVMGLSNVAVSRLALTWEKLPSKFKKFYAEFESLMDPSRNHRAYR  
LTVAK--LEA-----PLIPF-MPLLIKDMTFT-----  
-----HEGNK--TFT-----D---NLVNFE-KMRMIANTA---RTVRYCRSQPFNPDA  
AQAN-KN-----HGDVRSYVRQ-LNVIDNQRTLSQMSHR---LEPR  
>Rapgef4\_[Oryzias\_latipes]\_765148741  
SSKDLAYQMTMFDWELFSCVHEH----ELL-----YHTFG-RQSF--R-R-----TTA--  
-----NLDLFLRRFNQVMLWVTEVCLCNQLSKRVQLLKKFIKIA-  
AHCKE-FKNLNSFFAIIMGMSNPAVSRLSQTWEKLPTKFKKFYAEFESLMDPSRNHRAYR  
ITVTK--LEP-----PIIPF-MPLLLKDMTFT-----  
-----HEGNK--TFI-----D---NMVNFE-KMRIANTI---RQVRHCRSQPFNPDI  
CQPN-KN-----QAEVRGYVRK-LCVIDNQRALTQLSYR---LEPR  
>Rapgef4\_[Otolemur\_garnettii]\_831228731  
SSKDLAYQMTIYDWELFNCVHEL----ELI-----YHTFG-RHNF--K-K-----TTA--  
-----NLDLFLKRFNEIQFWVTEICLCSQLSKRVQLLKKFIKIA-  
AHCKE-YKNLNSFFAIVMGLSNVAVSRLTLTWEKLPSKFKKFYAEFESLMDPSRNHRAYR  
LTVAK--LEP-----PLIPF-MPLLIKDMTFT-----  
-----HEGNK--TFI-----D---NLVNFE-KMRMITNTA---RTVRYCRSQPFNPDA  
AQAN-KN-----HGDVRSYVRQ-LNVIDNQRTLSQMSHR---LEPR  
>Rapgef4\_[Ovis\_aries\_musimon]\_965808735  
SSKDLAYQMTIYDWELFNCVHEL----ELI-----YHTFG-RHHF--K-K-----TTA--  
-----NLDLFLRRFNEIQFWVTEICLCSQPSKRVQLLKKFIKIA-  
AHCKE-YKNLNSFFAIVMGLSNVAVSRLALTWEKLPSKFKKFYAEFESLMDPSRNHRAYR  
LTVAK--LDP-----PLIPF-MPLLIKDMTFT-----  
-----HEGNK--TFI-----D---NLVNFE-KMRMIANTA---RTVRYCRSQPFNPDA  
AQAN-KN-----HGDVRSYVRQ-LNVIDNQRTLSQMSHR---LEPR  
>Rapgef4\_[Ovis\_aries]\_426220871  
SSKDLAYQMTIYDWELFNCVHEL----ELI-----YHTFG-RHHF--K-K-----TTA--  
-----NLDLFLRRFNEIQFWVTEICLCSQPSKRVQLLKKFIKIA-  
AHCKE-YKNLNSFFAIVMGLSNVAVSRLALTWEKLPSKFKKFYAEFESLMDPSRNHRAYR  
LTVAK--LDP-----PLIPF-MPLLIKDMTFT-----  
-----HEGNK--TFI-----D---NLVNFE-KMRMIANTA---RTVRYCRSQPFNPDA  
AQAN-KN-----HGDVRSYVRQ-LNVIDNQRTLSQMSHR---LEPR  
>Rapgef4\_[Pan\_troglodytes]\_1034150401  
SSKDLAYQMTIYDWELFNCVHEL----ELI-----YHTFG-RHNF--K-K-----TTA--  
-----NLDLFLRRFNEIQFWVITEICLCSQLSKRVQLLKKFIKIA-  
AHCKE-YKNLNSFFAIVMGLSNVAVSRLALTWEKLPSKFKKFYAEFESLMDPSRNHRAYR  
LTVAK--LEP-----PLIPF-MPLLIKDMTFT-----  
-----HEGNK--TFI-----D---NLVNFE-KMRMIANTA---RTVRYCRSQPFNPDA  
AQAN-KN-----HGDVRSYVRQ-LNVIDNQRTLSQMSHR---LEPR  
>Rapgef4\_[Panthera\_tigris\_altaica]\_987393874  
SSKDLAYQMTIYDWELFNCVHEL----ELI-----YHTFG-RHNF--K-K-----TTA--  
-----NLDLFLRRFNEIQFWVTEICLCSQPSKRVQLLKKFIKIA-  
AHCKE-YKNLNSFFAIVMGLSNVAVSRLALTWEKLPSKFKKFYAEFESLMDPSRNHRAYR  
LTVAK--LEP-----PLIPF-MPLLIKDMTFT-----  
-----HEGNK--TFI-----D---NLVNFE-KMRMIANTA---RTVRYCRSQPFNPDA  
AQAN-KN-----HGDVRSYVRQ-LNVIDNQRTLSQMSHR---LEPR  
>Rapgef4\_[Pantholops\_hodgsonii]\_556763448  
SSKDLAYQMTIYDWELFNCVHEL----ELI-----YHTFG-RHHF--K-K-----TTA--  
-----NLDLFLRRFNEIQFWVTEICLCSQPSKRVQLLKKFIKIA-

AHCKE-YKNLNSFFAIVMGLSNVAVSRLALTWEKLPSKFKKFYAEFESLMDPSRNHRAYR  
LTVAK--LDP-----PLIPF-MPLLIKDMTFT-----  
-----HEGNK--TFI-----D---NLVNFE-KMRMIANTA---RTVRYCRSQPFNPDA  
AQAN-KN-----HGDVRSYVRQ-LSVIDNQRTLSQMSHR---LEPR  
>Rapgef4\_[Papio\_anubis]\_402888644  
SSKDLAYQMTIYDWELFNCVHEL----ELI-----YHTFG-RHNF--K-K-----TTA--  
-----NLDLFLRRFNEIQFWVTEICLCSQLSKRVQLLKKFIKIA-  
AHCKE-YKNLNSFFAIVMGLSNVAVSRLALTWEKLPSKFKKFYAEFESLMDPSRNHRAYR  
LTVAK--LEP-----PLIPF-MPLLIKDMTFT-----  
-----HEGNK--TFI-----D---NLVNFE-KMRMIANTA---RTVRYRSQPFNPDA  
AQAN-KN-----HGDVRSYVRQ-LNVIDNQRTLSQMSHR---LEPR  
>Rapgef4\_[Parasteatoda\_tepidariorum]\_1009531414  
NSLDIAYGMTIYEWDLFSCVHEY----ELI-----YQVFG-RHQF--R-K-----IMS--  
-----NLDVFLRRFNEIQHWVTEMLCNNLSRRVALLRKFIKIA-  
AHCRE-HQNMNSFFAIVMGLSNVAVSRMTQTWEKLPSKLRKFSEFEALIDPSRNHRRYR  
LTVSK--MVP-----PIIPF-MPLLLKDMTFS-----  
-----HEGNK--TYM-----E---GLLNFE-KMHMIAQSL---RTIRHCRSQPLELDP  
PPGN-KP-----QQDVARNYIRN-LRIIDNQKRLTQLSDV---LEPR  
>Rapgef4\_[Parus\_major]\_998705928  
SSKDLAHQMTIYDWELFNCVHEL----ELI-----YHTFG-RHNF--K-K-----TTA--  
-----NLDLFLRRFNEIQFWVTEICLCSQLSKRVQLLKKYIKIA-  
AHCKE-YKNLNSFFAIVMGLSNVAVSRLSLTWEKLPSKFKKIYAEFESLMDPSRNHRAYR  
LTVAK--LDP-----PIIPF-MPLLIKDMTFT-----  
-----HEGNK--TFT-----D---NLVNFE-KMRMIANTV---RTVKFCRSQSFPNPDA  
ALTN-KN-----HGDVRSYVRQ-LNVIDNQRTLSQMSHR---LEPR  
>Rapgef4\_[Pelecanus\_crispus]\_694636029  
SSKDLAHQMTVYDWELFNCVHEL----ELI-----YHTFG-RHNF--K-K-----TTA--  
-----NLDLFLRRFNEIQFWVTEICLCSQLSKRVQLLKKYIKIA-  
AHCKE-YKNLNSFFAIVMGLSNVAVSRLSLTWEKLPSKFKKIYAEFESLMDPSRNHRAYR  
LTVAK--LDP-----PIIPF-MPLLIKDMTFT-----  
-----HEGNK--TFT-----D---NLVNFE-KMRMIANTV---RTVKFCRSQSFPNPDA  
ALTN-KN-----HGDVRSYVRQ-LNVIDNQRTLSHMSHR---LEPR  
>Rapgef4\_[Peromyscus\_maniculatus\_bairdii]\_1008739312  
SSKDLAYQMTTYDWELFNCVHEL----ELI-----YHTFG-RHNF--K-K-----TTA--  
-----NLDLFLRRFNEIQFWVTEICLCSQLSKRVQLLKKFIKIA-  
AHCKE-YKNLNSFFAIVMGLSNVAVSRLALTWEKLPSKFKKFYAEFESLMDPSRNHRAYR  
LTAAC--LDP-----PLIPF-MPLLIKDMTFT-----  
-----HEGNK--TFI-----D---NLVNFE-KMRMIANTA---RTVRYRSQPFNPDA  
AQAN-KN-----HGDVRSYVRQ-LNVIDNQRTLSQMSHR---LEPR  
>Rapgef4\_[Phaethon\_lepturus]\_723137806  
SSKDLAHQMTIYDWELFNCVHEL----ELI-----YHTFG-RHNF--R-K-----TTA--  
-----NLDLFLRRFNEIQFWVTEICLCSQLSKRVQLLKKFIKIA-  
AHCKE-YKNLNSFFAIVMGLSNVAVSRLSLTWEKLPSKFKKIYAEFESLMDPSRNHRAYR  
LTVAK--LDP-----PIIPF-MPLLIKDMTFT-----  
-----HEGNK--TFT-----D---NLVNFE-KMRMIANTV---RTVKFCRSQSFPNPDA  
AITS-KN-----HGDVRSYVRQ-LNVIDNQRTLSQMSHR---LEPR  
>Rapgef4\_[Phalacrocorax\_carbo]\_695135744  
SSKDLAHQMTIYDWELFNCVHEL----ELI-----YHTFG-RHNF--K-K-----TTA--  
-----NLDLFLRRFNEIQFWVTEICLCSQLSKRVQLLKKYIKIA-  
AHCKE-YKNLNSFFAIVMGLSNVAVSRLSLTWEKLPSKFKKIYAEFESLMDPSRNHRAYR  
LTVAK--LDP-----PIIPF-MPLLIKDMTFT-----  
-----HEGNK--TFT-----D---NLVNFE-KM-----  
-----  
>Rapgef4\_[Physeter\_catodon]\_593753582



SSKDLAYQMTVYDWDLFSCVHEL----ELI-----YHTFG-RHHF--K-K-----TTA--  
-----NLDLFLRRFNEIQFWVTEICLCSQPSKRVQLLKKFIKIA-  
AHCKE-YKNLNSFFAIVMGLSNVAVSRLALTWEKLPSKFKKFYAEFESLMDPSRNHRAYR  
LTVAK--LDP-----PLIPF-MPLLIKDMTFT-----  
-----HEGNK--TFI-----D---NLVNFE-KMRMIANTA---RTVRYCRSQPFNPDA  
AQAN-KN-----HQDVRSYVRQ-LNVIDNQRTLSQMSHR---LEPR  
>Rapgef4\_[*Picoides pubescens*]<sub>699690688</sub>  
SSKDLAYQMTIYDWELFSCVHEL----ELI-----YHTFG-RHNF--K-K-----TTA--  
-----NLDLFLRRFNEIQFWVTEICLCSQLSKRVQLLKKYIKIA-  
AHCKE-YKNLNSFFAIIMGLSNVAVSRLLLTWEKLPSKFKKIYAEFESLMDPSRNHRAYR  
LTVAK--LDP-----PLIPF-MPLLIKDMTFT-----  
-----HEGNK--TFT-----D---KLVNFE-KMRMIANTV---RTVKFCRSQPFNPDA  
ALAN-KN-----HQDVRSYVRQ-LNVIDNQRTLSQMSHR---LEPR  
>Rapgef4\_[*Podiceps cristatus*]<sub>683474669</sub>  
SSKDLAQMTIYDWELFNCVHEL----ELI-----YHTFG-RHNF--K-K-----TTA--  
-----NLDLFLRRFNEIQFWVTEICLCAQLSKRVQLLKKYIKIA-  
AHCKE-YKNLNSFFAIIMGLSNVAVSRLSLTWEKLPSKFKKIYAEFESLMDPSRNHRAYR  
LTVAK--LDP-----PIIPF-MPLLIKDMTFT-----  
-----HEGNK--TFT-----D---NLVNFE-KMRMIANTV---RTVKFCRSQSFPNPDA  
ALTN-KN-----HQDVRSYVRQ-LNVIDNQRTLSQMSHR---LEPR  
>Rapgef4\_[*Poecilia formosa*]<sub>617381053</sub>  
SSKDVAYHMTFYDWELFHCVHEL----ELI-----YHTFG-RQHV--K-K-----TTV--  
-----NLDLFLQRFNEIQFWVITEVCLCSQLNKRQVQLLKKFIKIA-  
AHCKE-YKNLNAFFAVILGLSHPAVSRLSQTWEKLPSKFKKFYGEFENLMDPSRNHRAYR  
LTVAK--LAP-----PVIPIF-MPLMIKDMTFT-----  
-----HEGNK--TFI-----D---NLVNFE-KMRMIAKTV---KTVRYYRSQTFSPDS  
PQAG-KH-----HPDVWTYVRQ-LSVIDNQRTLTQLSHG---LEPR  
>Rapgef4\_[*Poecilia latipinna*]<sub>961931717</sub>  
SSKDVAYHMTFYDWELFHCVHEL----ELI-----HHTFG-RQHV--K-K-----TTV--  
-----NLDLFLQRFNEIQFWVITEVCLCSQLNKRQVQLLKKFIKIA-  
AHCKE-YKNLNAFFAVIMGLSHPAVSRLSQTWEKLPSKFKKFYGEFENLMDPSRNHRAYR  
LTVAK--LAP-----PVIPIF-MPLMIKDMTFT-----  
-----HEGNK--TFI-----D---NLVNFE-KMRMIAKTV---KTVRYYRSQTFSWEA  
S-----  
>Rapgef4\_[*Poecilia reticulata*]<sub>658898199</sub>  
SSKDLAYQMTMFDWELFSCVHEH----ELL-----YHTFG-RHSF--R-R-----TTA--  
-----NLDLFLRRFNQVQLWVTEVCLCTQLSKRVQLLKKFIKIA-  
AHCKE-FKNLNSFFAIIMGMSNPAVSRLSQTWEKLPTKFKKFYAEFESMMDPSRNHRSYR  
LTVTK--LEP-----PIIPF-MPLLLKDMTFT-----  
-----HEGNK--TFI-----D---NMVNFE-KMRI IANTI---RQVRHCRSQPFNPDI  
CQPN-KN-----QAEVRGYVRK-LCVIDNQRALTQLSYR---LEPR  
>Rapgef4\_[*Pongo abelii*]<sub>207080022</sub>  
SSKDLAYQMTIYDWELFNCVHEL----ELI-----YHTFG-RHNF--K-K-----TTA--  
-----NLDLFLRRFNEIQFWVTEICLCSQLSKRVQLLKKFIKIA-  
AHCKE-YKNLNSFFAIAMGLSNVAVSRLALTWEKLPSKFKKFYAEFESLMDPSRNHRAYR  
LTVAK--LEP-----PVIPIF-MPLLIK-----  
-----  
>Rapgef4\_[*Propithecus coquereli*]<sub>826312084</sub>  
SSKDLAYQMTIYDWELFNCVHEL----ELI-----YHTFG-RHNF--K-K-----TTA--  
-----NLDLFLRRFNEIQFWVTEICLCSQLSKRVQLLKKFIKIA-  
AHCKE-YKNLNSFFAIVMGLSNVAVSRLALTWEKLPSKFKKFYAEFESLMDPSRNHRAYR  
LTVAK--LEP-----PLIPF-MPLLIKDMTFT-----  
-----HEGNK--TFI-----D---NLVNFE-KMRMITNTA---RTVRYYRSQPFNPDA

AQAN-KN-----HQDVSRYVRQ-LNVIDNQRTLSQMSHR---LEPR  
 >Rapgef4\_[Protobothrops\_mucrosquamatus]\_1002568461  
 SSKDLAYQMTIFEWELFNCVHEL----ELV-----YHTFG-RHHF--K-K-----TTA--  
 -----NLELFLRRFNEIQFWVTEICLCSQLSKRVQLLKKFIKIA-  
 AHCKE-YKNLNSFFALIMGLSNVAVSRLTMTWEKLPSKFKKIYAEFESLMDPSRNHRAYR  
 LTVAK--LEP-----PIIPF-MPLLIKDMTFT-----  
 -----YEGNK--TFI-----D---NLVNFE-KMRMISNTI---KTVRFCSRSLPFNPDA  
 SQAN-KN-----HQDLRGYVRQ-LNVIDNQRTLSQMSHR---LEPR  
 >Rapgef4\_[Pseudopodoces\_humilis]\_929420255  
 SSKDLAHQMTIYDWELFNCVHEL----ELI-----YHTFG-RHNF--K-K-----TTA--  
 -----NLDLFLRRFNEIQFWVTEICLCSQLSKRVQLLKKYIKIA-  
 AHCKE-YKNLNSFFAIIMGLSNVAVSRLSLTWEKLPSKFKKIYAEFESLMDPSRNHRAYR  
 LTVAK--LDP-----PIIPF-MPLLIKDMTFT-----  
 -----HEGNK--TFT-----D---NLVNFE-KMRMIANTV---RTVKFCSRQSFPNPDA  
 ALTN-KN-----HQDVSRYVRQ-LNVIDNQRTLSQMSHR---LEPR  
 >Rapgef4\_[Pterocles\_gutturalis]\_704489718  
 SSKDLAYQMTIYDWELFNCVHEM----ELI-----YHTFG-RHNF--K-K-----TTA--  
 -----NLDLFLRRFNEIQFWVTEICLCSQLSKRVQLLKKYIKIA-  
 AHCKE-YKNLNSFFAIIMGLSNVAVSRLSLTWEKLPSKFKKIYAEFESLMDPSRNHRAYR  
 LTVTK--LDP-----PIIPF-MPLLIKDMTFT-----  
 -----HEGNK--TFT-----D---NLVNFE-KM-----  
 -----  
 >Rapgef4\_[Pteropus\_alecto]\_586532746  
 SSKDLAYQMTIYDWELFNCVHEL----ELI-----YHTFG-RHNF--K-K-----TTA--  
 -----NLDLFLRRFNEIQFWVTEICLCSQPSKRVQLLKKFIKIA-  
 AHCKE-YKNLNSFFAIVMGLSNVAVSRLALTWEKLPSKFKKFYAEFESLMDPSRNHRAYR  
 LTVAK--LEP-----PLIPF-MPLLIKDMTFT-----  
 -----HEGNK--TFI-----D---NLVNFE-KMRMIANTA---RTVRYCRSQPFNLDA  
 AQAN-KN-----HQDVSRYVRQ-LNVIDNQRTLSQMSHR---LEPR  
 >Rapgef4\_[Pundamilia\_nyererei]\_548336931  
 SSKDLAYQMTMFWDWELFSCVHEH----ELL-----YHTFG-CQSF--K-R-----TTA--  
 -----NLDLFLRRFNQVQLWVTEVCLCGQLSKRVQLLKKFIKIA-  
 AHCRE-FKNLNSFFAIIMGMSNPAVSRLSQTWEKLPTKFKKFYAEFENMMDPSRNHRYSYR  
 LTVTK--LEP-----PIIPF-VPLLLKDMTFT-----  
 -----HEGNK--TFI-----D---NMINFE-KMRI IANTI---RQVRHCRSQPFNPDI  
 CQPN-KN-----QAEVRAYVRK-LCVIDNQRALTQLSYR---LEPR  
 >Rapgef4\_[Pygoscelis\_adeliae]\_690425254  
 SSKDLAHQMTIYDWELFNCVHEL----ELI-----YHTFG-RHNF--K-K-----TTA--  
 -----NLDLFLRRFNEIQFWVTEICLCSQLSKRVQLLKKYIKIA-  
 AHCKE-YKNLNSFFAIIMGLSNVAVSRLSLTWEKLPSKFKKIYAEFESLMDPSRNHRAYR  
 LTVAK--LDP-----PIIPF-MPLLIKDMTFT-----  
 -----HEGNK--TFT-----D---NLVNFE-KMRMIANTV---RTVKFCSRQSFPNPDA  
 ALTN-KN-----HQDVSRYVRQ-LNVIDNQRTLSHMSHR---LELR  
 >Rapgef4\_[Python\_bivittatus]\_1004668302  
 SSKDLAYQMTIFEWELFNCVHEL----ELV-----YHTFG-RHNF--K-K-----TTA--  
 -----NLDLFLRRFNEIQFWVTEICLCSQLSKRVQLLKKFIKIA-  
 AHCKE-YKNLNSFFALIMGLSNVAVSRLTMTWEKLPSKFKKIYAEFESLMDPSRNHRAYR  
 LTVAK--LEP-----PIIPF-MPLLIKDMTFT-----  
 -----HEGNK--TFI-----D---NLVNFE-KMRMISNTI---RTVKFCSRSLPFSLDA  
 SQAN-KN-----HQDVSRYVRQ-LSVIDNQRTLSQMSHR---LEPR  
 >Rapgef4\_[Rattus\_norvegicus]\_293346052  
 SSKDLAYQMTTYDWELFNCVHEL----ELI-----YHTFG-RHNF--K-K-----TTA--  
 -----NLDLFLRRFNEIQFWVTEICLCSQLSKRVQLLKKFIKIA-  
 AHCKE-YKNLNSFFAIVMGLSNVAVSRLALTWEKLPSKFKKFYAEFESLMDPSRNHRAYR

LTAAK--LEP-----PLIPF-MPLLIKDMTFT-----  
 -----HEGNK--TFI-----D---NLVNFE-KMRMIANTA---RTVRYYSQPFNPDA  
 AQAN-KN-----HQDVSRYVRQ-LNVIDNQRTLSQMSHR---LEPR  
 >Rapgef4\_[Rhinopithecus\_roxellana]\_724894127  
 SSKDLAYQMTIYDWELFNCVHEL----ELI-----YHTFG-RHNF--K-K-----TTA--  
 -----NLDLFLRRFNEIQFWVTEICLCSQLSKRVQLLKKFIKIA-  
 AHCKE-YKNLNSFFAIVMGLSNVAVSRLALTWEKLPSKFKKFYAEFESLMDPSRNHRAYR  
 LTVAK--LEP-----PLIPF-MPLLIKDMTFT-----  
 -----HEGNK--TFI-----D---NLVNFE-KMRMIANTA---RTVRYYSQPFNPDA  
 AQAN-KN-----HQDVSRYVRQ-LNVIDNQRTLSQMSHR---LEPR  
 >Rapgef4\_[Rousettus\_aegyptiacus]\_1012008377  
 SSKDLAYQMTIYDWELFNCVHEL----ELI-----YHTFG-RHNF--K-K-----TTA--  
 -----NLDLFLRRFNEIQFWVTEICLCSQPSKRVQLLKKFIKIA-  
 AHCKE-YKNLNSFFAIVMGLSNVAVSRLALTWEKLPSKFKKFYAEFESLMDPSRNHRAYR  
 LTVAK--LEP-----PLIPF-MPLLIKDMTFT-----  
 -----HEGNK--TFI-----D---NLVNFE-KMRMIANTA---RTVRYCRSQPFNPDA  
 AQAN-KN-----HQDVSRYVRQ-LNVIDNQRTLSQMSHR---LEPR  
 >Rapgef4\_[Saccoglossus\_kowalevskii]\_585695958  
 STKEVAYQMTLYDWELLNCLHEY----ELI-----YHTFG-RHKF--G-K-----ITC--  
 -----NLDMLLRRFNEVQFWVTEMCNTLTLGKRVQLLRKFIKIA-  
 AFCKE-YKNMNSFFSIVMGLSNIASRLSQTWEKLPSKFKRMFAEFETTLDPSRNHRVYR  
 LAVAK--MQP-----PIIPF-MPLLMKDMTFT-----  
 -----HEGNK--TYF-----D---GLVNFE-KMHMIATTI---RTIKYCRSEPFKVE-  
 PPPAVKN-----VQEVRAYVRN-LSVIDNQRTLTQLSHK---LEPR  
 >Rapgef4\_[Saimiri\_boliviensis\_boliviensis]\_403258758  
 SSKDLAYQMTIYDWELFHCVHEL----ELI-----YHTFG-RHNF--K-K-----TTA--  
 -----NLDLFLRRFNEIQFWVTEICLCSQLSKRVQLLKKFIKIA-  
 AHCKE-YKNLNSFFAIVMGLSNVAVSRLALTWEKLPSKFKKFYAEFESLMDPSRNHRAYR  
 LTVAK--LEP-----PLIPF-MPLLIKDMTFT-----  
 -----HEGNK--TFI-----D---NLVNFE-KMRMIANTA---RTVRYYSQPFNPDA  
 AQAN-KN-----HQDVSRYVRQ-LNVIDNQRTLSQMSHR---LEPR  
 >Rapgef4\_[Salmo\_salar]\_929285053  
 SSKDLAYQMTVYDWELFHCVHEL----ELI-----YHTFG-RQNF--K-K-----TTA--  
 -----NMDLFLRRFNEIQLWVITEICLCTQLSKRVQMLKKFIKIA-  
 AHCKE-YKNLNSFFAIVMGMSNPAVSRLSQTWEKLPSKFKKFYSEFESLMDPSRNHRAYR  
 LTVAK--LDP-----PIIPF-MPLLIKDMTFT-----  
 -----HDGNK--TFI-----D---SLVNFE-KMRMIANTV---RIVRYCRSLPFSAPF  
 SOTS-KN-----HLDVSRYVRQ-LAVIDNQRTLSQLSHR---LEPR  
 >Rapgef4\_[Sarcophilus\_harrisii]\_395519780  
 SSKDLAYQMTIYDWELFNCVHEL----ELI-----YHTFG-RHNF--K-K-----TTA--  
 -----NLDLFLRRFNEIQFWVTEICLCAQLSKRVQLLKKFIKIA-  
 AHCKE-YKNLNSFFAIVMGLSNVAVSRLALTWEKLPSKFKKIYAEFESLMDPSRNHRAYR  
 LTVAK--LDP-----PLIPF-MPLLIKDMTFT-----  
 -----HEGNK--TFI-----D---NLVNFE-KMRMIANTV---RTVRYCRSQPFNPDA  
 ALAN-KN-----HQDIRGYVRQ-LNVIDNQRTLSQMSHR---LEPR  
 >Rapgef4\_[Serinus\_canaria]\_683906367  
 SSKDLAHQMTIYDWELFNCVHEL----ELI-----YHTFG-RHNF--K-K-----TTA--  
 -----NLDLFLRRFNEIQFWVTEICLCSQLSKRVQLLKKYIKIA-  
 AHCKE-YKNLNSFFAIVMGLSNVAVSRLSLTWEKLPSKFKKIYAEFESLMDPSRNHRAYR  
 LTVAK--LDP-----PIIPF-MPLLIKDMTFT-----  
 -----HEGNK--TFT-----D---NLVNFE-KMRMIGNTV---RTVKFCRSQSFPNPDA  
 ALTN-KN-----HQDVSRYVRQ-LNVIDNQRTLSQMSHR---LEPR  
 >Rapgef4\_[Sinocyclocheilus\_anshuiensis]\_1025001496  
 SSKDLAHQMTLYDWELFDCVHEH----ELI-----YHTFG-RQHF--K-K-----TTA--

```

-----NLDLFLRRFNEVQLWVVTEVCLCPTLSKR VQLLKKFIKIS-
AHCKE-FKNLNSFFAIIMGLGNPAVCRLSQTWEKLPSKFKKFYGEFENLMDPSRNHRAYR
LTVAK--LEP-----PIIPF-MPLLIKDMTFT-----
-----HEGNK--TFT-----D---RLVNFE-KMRMIANTV---RIMRYCRSQPFNQEA
PQATGKS-----HQDVRSYVRH-ISVIDNQRTLSQLSHR---LEPR
>Rapgef4_[Sinocyclocheilus_grahami]_1020489045
SSKDLAHQMTLYDWELFDCVHEH---ELI-----YHTFG-RQHF--K-K-----TTA--
-----NLDLFLRRFNEVQLWVVTEVCLCPTLSKR VQLLKKFIKIA-
AHCKE-FKNLNSFFAIIMGLGNPAVCRLSHTWEKLPSKFKKFYVEFENLMDPSRNHRAYR
LTVAK--LEP-----PIIPF-MPLLIKDMTFT-----
-----HEGNK--TFT-----D---RLVNFE-KMRMIANTV---RIMRYCRSQPFNQEA
PQATGKS-----HQDVRSYMRH-ISVIDNQRTLSQLSHR---LEPR
>Rapgef4_[Sinocyclocheilus_rhinocerosus]_1025414289
SSKDLAHQMTLYDWELFDCVHEH---ELI-----YHTFG-RQHF--K-K-----TTA--
-----NLDLFLRRFNEVQLWVVTEVCLCLTSLKR VQLLKKFIKIA-
AHCKE-FKNLNSFFAIIMGLGNPAVCRLSHTWEKLPSKFKKFYGEFENLMDPSRNHRAYR
LTVAK--LEP-----PIIPF-MPLLIKDMTFT-----
-----HEGNK--TFT-----D---RLVNFE-KMRMIANTV---RIMRYCRSQPFNQEA
PQATGKS-----HQDVRSYMRH-ISVIDNQRTLSQLSHR---LEPR
>Rapgef4_[Sorex_araneus]_505771648
SSKDLAYQMTIYDWELFNCVHEL---ELI-----YHTFG-RHNF--K-K-----TTA--
-----NLDLFLRRFNEIQFWVTEICLCSQLSKRVQLLKKFIKIA-
AHCKE-YKNLNSFFAIVMGLSNVAVSRLALTWEKLPSKFKKFFAEFESLMDPSRNHRAYR
LTVAK--LDP-----PLTPF-MPLLIKDMTFT-----
-----HEGNK--TFV-----D---NLVNFE-KMRMIANTA--RTVRYCRSQPFNPDA
AQAN-KN-----HQDVRSYVRQ-LNVIDNQRTLSQLMSHR---LEPR
>Rapgef4_[Stegodyphus_mimosarum]_675363725
NSLDIAYNMITYEWDLFSCVHEY---ELI-----YQVFG-RHQF--R-K-----IMS--
-----NLDVFLRRFNEVQFWVTEMTLATTLSRRVALLRKFIKIA-
AHCRE-YQNMNSFFAIVMGLSNVAVSRMSQTWEKLPSKLRKRTFADFEALIDPSRNHRRYR
LTVAK--MVP-----PIIPF-MPLLLKDMTFS-----
-----HEGNK--TFM-----E---GLLNFE-KMHMIAQTL--RTIRHCRSQPLVFDP
PPGN-KS-----QQDVRNYIRN-LRIIDNQKRLTQLSDA---LEPR
>Rapgef4_[Strongylocentrotus_purpuratus]_390363651
SSRELAYQMTMYDWQLFLCTHEC---EFI-----YHTFG-RHKY--R-R-----ITA--
-----NLDVFLRRFNEVQSWIVTELCLTSHISKRVHLLKKFIKIA-
AHCKE-YQNMNSFYAIIMGLSHMSVSRLAQTDKLPNKLKRVFSDFEALMDPSRNHRVYR
LALSK--MRP-----PIIPF-MPLLIKDMFLT-----
-----HEGNK--TYF-----E---GLVNFE-KMHLVASIM--RVVKYCRSENFKLDS
PP-AVKN-----VKEIVSYVRN-LQVIDNTRKLMQLSYT---LEP-
>Rapgef4_[Struthio_camelus_australis]_697502536
SSKDLAYQMTIYDWELFNCVHEL---ELI-----YHTFG-RHNF---K---K-TTA--
-----NLDLFLRRFNEIQFWVTEICLCSQLSKRVQLLKKYIKIA-
AQ-----
-----
-----
-----
>Rapgef4_[Sturnus_vulgaris]_959065034
SSKDLAHQMTIYDWELFNCVHEL---ELI-----YHTFG-RHNF--K-K-----TTA--
-----NLDLFLRRFNEIQFWVTEICLCSQLSKRVQLLKKYIKIA-
AHCKE-YKNLNSFFAIIMGLSNVAVSRLSLTWEKLPSKFKKIYAEFESLMDPSRNHRAYR
LTVAK--LDP-----PIIPF-MPLLIKDMTFT-----
-----HEGNK--TFT-----D---NLVNFE-KMRMIANTV---RTVKFCRSQSFPNPDA
ALTN-KN-----HQDVRSYVRQ-LNVIDNQRTLSQLMSHR---LEPR

```

```

>Rapgef4_[Sus_scrofa]_927210423
SSKDLAYQMTIYDWELFNCVHEL----ELI-----YHTFG-RHHF--K-K-----TTA--
-----NLDLFLRRFNEIQFWVTEICLCSQPSKRVQLLKKFIKIA-
AHCKE-YKNLNSFFAIVMGLSNVAVSRLALTWEKLPSKFKKFYAEFESLMDPSRNHRAYR
LTVAK--LDP-----PLIPF-MPLLIKDMTFT-----
-----HEGNK--TFI-----D---SLVNFE-KMRMIANTA---RTVRYCRSQPFNPDA
AQAN-KN-----HQDVRSYVRQ-LNVIDNQRTLSQMSHR---LEPR
>Rapgef4_[Takifugu_rubripes]_768951741
SSKDLAYQMTMFDWELFSCMHEH----ELL-----YHTFG-RQNF--R-R-----TTA--
-----NLDLFLRRFNQVQLWVVTEVCLCSQLSKRVQLLKKFIKIA-
AHCRE-FKNLNSFFAIIMGMSNPAVSRLSQTWEKLPTKFKKFYAEFENMMDPSRNHRYSYR
LTVTK--LEP-----PIIPF-MPLLLKDMTFT-----
-----HEGNK--TFI-----D---TMVNFE-KMRIIANAI---RQVRHCRSQPFNPDI
CQPN-KN-----QAEVRGYVRK-LCVIDNQRALTQLSYR---LEPR
>Rapgef4_[Tinamus_guttatus]_719773627
SSKDLAYQMTIYDWELFNCVHEL----ELI-----YHTFG-RHNF--K-K-----TTA--
-----NLDLFLRRFNEIQFWVTEICLCSQLSKRVQLLKKYIKIA-
AHCKE-YKNLNSFFAIIMGMLSNVAVSRLSLTWEKLPSKFKKIYAEFESLMDPSRNHRAYR
LTVAK--LDP-----PIIPF-MPLLIKDMTFT-----
-----HEGNK--TLT-----D---NLVNFE-KMRMIANTV---RTVKFCRSQSFPNPDA
ALAN-KN-----HQDVRSYVRQ-LNVIDNQRTLSQMSHR---LEPR
>Rapgef4_[Trichechus_manatus_latirostris]_823389193
SSKDLAYQMTIYDWELFNCVHEL----ELI-----YHTFG-RHNF--K-K-----TTA--
-----NLDLFLRRFNEIQFWVTEICLCSQLSKRVQLLKKFIKIA-
AHCKE-CKNLNSFFAIVMGLSNVAVSRLALTWEKLPSKFKKFYAEFESLMDPSRNHRAYR
LTVAK--LEP-----PLIPF-MPLLIKDMTFT-----
-----HEGNK--TFI-----D---NLVNFE-KMRMIANTA---RTVRYCRSQPFNPDA
AQAN-KN-----HQDVRSYVRQ-LNVIDNQRTLSQMSHR---LEPR
>Rapgef4_[Trichinella_britovi]_954388358
TSTELAQHLLIYHWQLFINTHEY----ELL-----YHVVG-RNLF--PGK-----VPV--
-----NLDLLIRRFNELQFWVITEILLCGSVSKRAHVVKKFIKIA-
LHCKA-NQDLFSFFAITLGLSNVAISRLSQTWEKVNAKFRKLFFEFESLLDPSRNHRAYR
LLVAK--MKP-----PTIPF-IPLLLKDLLFA-----
-----HEGNK--TYF-----D---GMVNFE-KMHMAQTL---RNHRMYKSQMLQID-
---SSKI-----PTDAQHLVRN-FRIIDDQRKFLRLSHL---LEPK
>Rapgef4_[Trichinella_nativa]_954534911
TSTELAQHLLIYHWQLFINTHEY----ELL-----YHVVG-RNLF--PGK-----VPV--
-----NLDLLIRRFNELQFWVITEILLCGSVSKRAHVVKKFIKIA-
LHCKA-NQDLFSFFAITLGLSNVAISRLSQTWEKVNAKFRKLFFEFESLLDPSRNHRAYR
LLVAK--MKP-----PTIPF-IPLLLKDLLFA-----
-----HEGNK--TYF-----D---GM-----HMAQTL---RNHRMYKSQMLQID-
---SSKI-----PTDAQHLVRN-FRIIDDQRKFLRLSHL---LEPK
>Rapgef4_[Trichinella_papuae]_954590902
TSTELAQHLLIYHWQLFINTHEY----ELL-----YHVVS-RNLF--PGK-----VPV--
-----NLDLLIRRFNELQFWVITEILLCGSVSKRAHVVKKFIKIA-
LHCKT-NQDLFSFFAITLGLSNVAISRLSQTWEKVNAKFRKLFFEFESLLDPSRNHRAYR
LLVAK--MKP-----PTIPF-IPLLLKDLLFA-----
-----HEGNK--TYF-----D---GMVNFE-KMHMAQTL---RNHRMYKSQMPQID-
---SSKI-----PMDAQHLVRN-FRIIDDQRKFLRLSQL---LEPK
>Rapgef4_[Trichinella_patagoniensis]_954341166
TSTELAQHLLIYHWQLFINTHEY----ELL-----YHVVG-RNLF--PGK-----VPV--
-----NLDLLIRRFNELQFWVITEILLCGSVSKRAHVVKKFIKIA-
LHCKA-NQDLFSFFAITLGLSNVAISRLSQTWEKVNAKFRKLFFEFESLLDPSRNHRAYR
LLVAK--MKP-----PTIPF-IPLLLKDLLFA-----

```

-----HEGNK--TYF-----D---GMVNFE-KMHMAQTL---RNHRMYKSQMLQID-  
---SSKI-----PTDAQHLVRN-FRIIDDQRKFLRLSQL---LEPK  
>Rapgef4\_[Trichinella\_sp.\_T8]\_954617710  
TSTELAQHLLIYHWQLFINTHEY----ELL-----YHVVG-RNLF--PGK-----VPV--  
-----NLDLLIRRFNELQFWVITEILLCGSVSKRAHVVKKFIKIA-  
LHCKA-NQDLFSFFAITLGLSNVAISRLSQTWEKVNAKFRKLFFEFESLLDPSRNHRAYR  
LLVAK--MKP-----PTIPF-IPLLLKDLLFA-----  
-----HEGNK--TYF-----D---GM-----HMAQTL---RNHRMYKSQMLQID-  
---SSKI-----PTDAQHLVRN-FRIIDDQRKFLRLSQL---LEPK  
>Rapgef4\_[Trichinella\_spiralis]\_339242857  
TSTELAQHLLIYHWQLFINTHEY----ELL-----YHVVG-RNLF--PGK-----VPV--  
-----NLDLLIRRFNELQFWVITEILLCGSVSKRAHVVKKFIKIA-  
LHCKA-NQDLFSFFAITLGLSNVAISRLSQTWEKVNAKFRKLFFEFESLLDPSRNHRAYR  
LLVAK--MKP-----PTIPF-IPLLLKDLLFA-----  
-----HEGNK--TYF-----D---GMVNFE-KMHMAQTL---RNHRMYKSQMLQID-  
---SSKI-----PTDAQHLVRN-FRIIDDQRKFLRLSQL---LEPK  
>Rapgef4\_[Trichinella\_zimbabwensis]\_954489457  
TSTELAQHLLIYHWQLFINTHEY----ELL-----YHVVG-RNLF--PGK-----VPV--  
-----NLDLLIRRFNELQFWVITEILLCGSVSKRAHVVKKFIKIA-  
LHCKT-NQDLFSFFAITLGLSNVAISRLSQTWEKVNAKFRKLFFEFESLLDPSRNHRAYR  
LLVAK--MKP-----PTIPF-IPLLLKDLLFA-----  
-----HEGNK--TYF-----D---GM-----HMAQTL---RNHRMYKSQMPQID-  
---SSKI-----PMDAQHLVRN-FRIIDDQRKFLRLSQL---LEPK  
>Rapgef4\_[Tupaia\_chinensis]\_562844419  
SSKDLAYQMTIYDWELFNCVHEL----ELI-----YHTFG-RHNF--K-K-----TTA--  
-----NLDLFLRRFNEIQFWVTEICLCSQLSKRVQLLKKFIKIA-  
AHCKE-YKNLNSFFAIVMGLSNVAVSRLALTWEKLPSKFKFYAEFESLMDPSRNHRAYR  
LTVAK--LEP-----PLIPF-MPLLIKDMTFT-----  
-----HEGNK--TFI-----D---NLVNFE-KMRMIANTA---RTVRYRSQPFNPDA  
AQAN-KN-----HQDVSRYVRQ-LNVIDNQRTLSQMSHR---LEPR  
>Rapgef4\_[Tyto\_alba]\_701375865  
SSKDLAHQMTIYDWELFNCVHEL----ELI-----YHTFG-RHNF--K-K-----TTA--  
-----NLDLFLRRFNEIQFWVTEICLCSQLSKRVQLLKKYIKIA-  
AHCKE-YKNLNSFFAIIMGLSNVAVSRLSLTWEKLPSKFKKIYAEFESLMDPSRNHRAYR  
LTVAK--LDP-----PIIPF-MPLLIKDMTFT-----  
-----HEGNK--TFT-----D---NLVNFE-KMRMIANTV---RTVKFCRSQSFPNPDA  
ALTN-KN-----HQDVSRYVRQ-LNVIDNQRTLSQMSHR---LEPR  
>Rapgef4\_[Ursus\_maritimus]\_670988645  
SSKDLAYQMTIYDWELFNCVHEL----ELI-----YHTFG-RHNF---K---K-TTA--  
-----NLDLFLRRFNEIQFWVTEICLCSQPSKRVQLLKKFIKIA-  
AHCKE-YKNLNSFFAIVMGLSNVAVSRLALTWERM-----  
-----  
-----  
-----  
>Rapgef4\_[Vicugna\_pacos]\_560983560  
SSKDLAYQMTTYDWELFNCVHEL----ELI-----YHTFG-RHHF--K-K-----TTA--  
-----NLDLFLRRFNEIQFWVTEICLCSQPSKRVQLLKKFIKIA-  
AHCKE-YKNLNSFFAIVMGLSNVAVSRLALTWEKLPSKFKFYAEFESLMDPSRNHRAYR  
LTVAK--LEP-----PLIPF-MPLLIKDMTFT-----  
-----HEGNK--TFI-----D---NLVNFE-KMRMIANTA---RMVRYCRSQPFNPDA  
AQAN-KN-----HQDVSRYVRQ-LNVIDNQRTLSQMSHR---LEPR  
>Rapgef4\_[Xenopus\_tropicalis]\_512866136  
SSKDLAYQMTIHDWDLFSCVHEL----ELI-----YHTFG-RQNF--K-K-----TTA--  
-----NLDLFLRRFNEIQFWVTEICLCPQLSKRVQLLKKFIKIA-

AHCKE-YKNLNSFFAIVMGLSNVAVSRLSLTWEKLPSKFKKIYAEFENLMDPSRNHRAYR  
 LTVAK--LDP-----PIIPF-TPLLIKDMTFT-----  
 -----HEGNK--TFI-----D---NLVNFE-KMRMIANTL---RTIRYCRSVFPNPDA  
 SLAG-KN-----HGDVRNYVRQ-FNVIDNQRTLSQMSHR---LEPR  
 >Rapgef4\_[Xiphophorus\_maculatus]\_941773030  
 SSKDLAYQMTMFDWELFSCVHEH----ELL-----YHTFG-RHSF--R-R-----TTA--  
 -----NLDLFLRRFNQVQLWVVTEVCLCTQLSKRVQLLKKFIKIA-  
 AHCRE-FKNLNSFFAIIMGMSNPVAVSRLSQTWEKLPTKFKKFYAEFESMMDPSRNHRYSYR  
 LTVTK--LEP-----PIIPF-MPLLLKDMTFT-----  
 -----HEGNK--TFI-----D---NMVNFE-KMRIANTI---RQVRHCRSQPFNPDI  
 CQPN-KN-----QAEVRGYVRK-LCVIDNQRTLSQSYR---LEPR  
 >Rapgef4\_[Zonotrichia\_albicollis]\_929451867  
 SSKDLAHQMTIYDWELFNCVHEL----ELI-----YHTFG-RHNF--K-K-----TTA--  
 -----NLDLFLRRFNEIQFWVVTEICLCSQLSKRVQLLKKYIKIA-  
 AHCKE-YKNLNSFFAIIMGLSNVAVSRLSLTWEKLPSKFKKIYAEFESLMDPSRNHRAYR  
 LTVAK--LDP-----PIIPF-MPLLIKDMTFT-----  
 -----HEGNK--TFT-----D---NLVNFE-KMRMIANTV---RTVKFCRSQSFNPEA  
 ALTN-KN-----HGDVRSYVRQ-LNVIDNQRTLSQMSHR---LEPR  
 >Rapgef4\_[Zootermopsis\_nevadensis]\_646703516  
 STKEVAYHMTQFDWDLFWSVHEY----ELI-----YHTFG-RHHF--G-Q-----ITA--  
 -----NLDVFLRRFNEIQFWVVTELCCLTPSLSKRVQILRKFIKLA-  
 AYCKE-YQNLNAFFAIVMGLSNVAVSRLSLTWEKLPSKFRKLYTEFESLIDPSRNHRAYR  
 ISVGK--LQP-----PVVPF-MPLLLKDMTFT-----  
 -----HEGNK--TCL-----D---GLVNFE-KMHMLAQTM---RTIRYCRSRHLLL-E  
 PPSP-KS-----EAEVRSYISC-LRIIDNQRVLTSLSQK---LEPR  
 >Rapgef5\_[Acanthisitta\_chloris]\_677780878  
 ---DLALELTNFDWSLFNAIHEQ----ELI-----YFTFS-RQGS--A-E-----NTE--  
 -----NLSLLLQRCNEVQLWVATEILLCSQLCKRVQLVKKFIKIA-  
 AHCKA-QRNLNSFFAIVMGLNTASVSRLSQTWEKIPGKFKKLFTELESITDPSLNHKAYR  
 DAFKK--MKS-----PKIPF-MPLLLKDVTFI-----  
 -----HEGNK--TFL-----D---NLVNFE-KLHMIADTV---RSLRHCRNNQFGNEV  
 PSKE-----HHELKPYVHH-LHVIDNQALFELSHR---IEPR  
 >Rapgef5\_[Acinonyx\_jubatus]\_961711358  
 ---DLALELMNFDWSLFNSIHEQ----ELI-----YFTFS-RQGS--G-E-----HTV--  
 -----NLSLLLQRCNEVQLWVATEILLCGQLGKRVQLVKKFIKIA-  
 AHCKA-QRNLNSFFAIVMGLNTASVSRLSQTWEKIPGKFKKLFSELESITDPSLNHKAYR  
 DAFKK--MKP-----PKIPF-MPLLLKDVTFI-----  
 -----HEGNK--TFL-----D---NLVNFE-KLHMIADTV---RTL RHCRNTNQFGGDM  
 SPKE-----HHELKSYVNH-LYVIDSQALFELSHR---IEPR  
 >Rapgef5\_[Ailuropoda\_melanoleuca]\_752425000  
 ---DLALELMNFDWSLFNSIHEQ----ELI-----YFTFS-RQGS--G-E-----HTA--  
 -----NLSLLLQRCNEIQLWVATEILLCAQLGKRVQLVKKFIKIA-  
 AHCKA-QRNLNSFFAIVMGLNTASVSRLSQTWEKIPGKFKKLFSELESITDPSLNHKAYR  
 DAFKK--MKP-----PKIPF-MPLLLKDVTFI-----  
 -----HEGNK--TFL-----D---NLVNFE-KLHMIADTV---RTL RHCRANQFGGDV  
 SPKE-----HQELKAYVTH-LYVIDSQALFELSHR---IEPR  
 >Rapgef5\_[Alligator\_mississippiensis]\_564231390  
 ---DLALELTNFDWSLFNSIHEQ----ELI-----YFTFS-RQGS--G-E-----NTV--  
 -----NLSLLLQRCNEVQLWVATEILLCSQLCKRVQLMKKFIKIA-  
 AHCKA-QRNLNSFFAIVMGLNTASVSRLSQTWEKIPGKFKKLFTELESITDPSLNHKAYR  
 DAFKK--MKS-----PKIPF-MPLLLKDVTFI-----  
 -----HEGNK--TFL-----D---NLVNFE-KLHMIADTV---RSLRHCRNNQFGNEV  
 PPKE-----HQELKPYVHH-LRVIDNQQTFLFELSHR---IEPR  
 >Rapgef5\_[Amazona\_aestiva]\_944296329

```

-----DPSLNHKAYR
DAFKK--MKS-----PKIPF-MPLLLKDVTFI-----
-----HEGNK--TFL-----D---NLVNFE-KLHMIADTV---RSLRHCRNNQLGNEV
-PS--KE-----HHELKPYVHH-LHVIDNQALFELSQR---IEPR
>Rapgef5_[Anas_platyrhynchos]_874476610
---DLALELTNFDWSLFNAIHEQ---ELI-----YFTFS-RQGS--A-E-----NTE--
-----NLSLLLQRCNEVQLWVATEILLCSQLCKRVQLVKKFIKIA-
AHCKA-QRNLNSFFAIVMGLNTASVSRLSQTWEKIPGKFKKLFTELESITDPSLNHKAYR
DAFKK--MKS-----PKIPF-MPLLLKDVTFI-----
-----HEGNK--TFL-----D---NLVNFE-KLHMIADTV---RSLRHCRNNQFGNEV
PSKE-----HHELKPYVHH-LHVIDNQALFELSHR---IEPR
>Rapgef5_[Anolis_carolinensis]_327274863
---DLALELTNFDWNLFNLVHEQ---ELI-----YFTFS-RQGS--G-E-----NTV--
-----NLSLLLQRCNEVQLWVATEILLCNQLCKRVQLVKKFIKIA-
AHCKA-QRNLNSFFAIVMGLNTASVSRLSQTWERIPGKFKKLFTELESITDPSLNHKAYR
DTFKK--MKS-----PKIPF-MPLLLKDVTFI-----
-----HEGNK--TFL-----D---NLVNFE-KLHMIADTV---RSLRHCRNNQFGNEV
PAKE-----HQELKSYVHH-LHIIDNQQLFELSHR---IEPR
>Rapgef5_[Anser_cygnoides_domesticus]_902874207
---DLALELTNFDWSLFNAIHEQ---ELI-----YFTFS-RQGS--A-E-----NTE--
-----NLSLLLQRCNEVQLWVATEILLCSQLCKRVQLVKKFIKIA-
AHCKA-QRNLNSFFAIVMGLNTASVSRLSQTWEKIPGKFKKLFSELESITDPSLNHKAYR
DAFKK--MKS-----PKIPF-MPLLLKDVTFI-----
-----HEGNK--TFL-----D---NLVNFE-KLHMIADTV---RSLRHCRNNQFGNEV
PSKE-----HHELKPYVHH-LHVIDNQALFELSHR---IEPR
>Rapgef5_[Aotus_nancymae]_817357660
---DLALELMNFDWSLFNSIHEQ---ELI-----YFTFS-RQGS--G-E-----HTA--
-----NLSLLLQRCNEVQLWVATEILLCSQLGKRVQLVKKFIKIA-
AHCKA-QRNLNSFFAIVMGLNTASVSRLSQTWEKIPGKFKKLFSELESITDPSLNHKAYR
DAFKK--MKP-----PKIPF-MPLLLKDVTFI-----
-----HEGNK--TFL-----D---NLVNFE-KLHMIADTV---RTL RHCRNTNQFG-DL
SPKE-----HQELKSYVNH-LYVIDSQALFELSHR---IEPR
>Rapgef5_[Aptenodytes_forsteri]_686607637
---DLALELTNFDWSLFNAIHEQ---ELI-----YFTFS-RQGS--A-E-----NTE--
-----NLSLLLQRCNEVQLWVATEILLCSQLCKRVQLVKKFIKIA-
AHCKA-QRNLNSFFAIVMGLNTASVSRLSQTWEKIPGKFKKLFTELESITDPSLNHKAYR
DAFKK--MKS-----PKIPF-MPLLLKDVTFI-----
-----HEGNK--TFL-----D---NLVNFE-KLHMIADTV---RSLRHCRNNQLGNEV
PSKE-----HHELKPYVHH-LHVIDNQALFELSHR---IEPR
>Rapgef5_[Aquila_chrysaetos_canadensis]_768372916
---DLALELTNFDWSLFNAIHEQ---ELI-----YFTFS-RQGS--A-E-----NTE--
-----NLSLLLQRCNEVQLWVATEILLCSQLCKRVQLVKKFIKIA-
AHCKA-QRNLNSFFAIVMGLNTASVSRLSQTWEKIPGKFKKLFTELESITDPSLNHKAYR
DAFKK--MKS-----PKIPF-MPLLLKDVTFI-----
-----HEGNK--TFL-----D---NLVNFE-KLHMIADTV---RSLRHCRNNQFGNEV
PSKE-----HHELKPYVHH-LHVIDNQALFELSHR---IEPR
>Rapgef5_[Balaenoptera_acutorostrata_scammoni]_594672128
---DIALELMNFDWSLFNSIHEQ---ELI-----YFTFS-RQGS--G-E-----HTV--
-----NLSLLLQRCNEVQLWVATEILLCSQLGKRVQLVKKFIKIA-
AHCKA-QRNLNSFFAIVMGLNTASVSRLSQTWEKIPGKFKKLFSELESITDPSLNHKAYR
DAFKK--MKP-----PKIPF-MPLLLKDVTFI-----
-----HEGNK--TFL-----D---NLVNFE-KLHMIADTV---RTL RHCRNTNQFGGDI

```



```

SPKE-----HPELKSIVVHH-LCVIDSQQALFALSHR---IEPR
>Rapgef5_[Bison_bison_bison]_742114515
---DLALELMNFDWSLFSSIHEQ---ELI-----YFTFS-RQGS--G-E-----HTA-
-----NLSLLLQRCNEVQLWVATEIILLCSPLGKRVQLVKKFIKIA-
AHCKA-QRNLNSFFAIVMGLNTASVSRLSQTWEKIPGKFKKLFSELESLTDP SLNHKAYR
DAFKK--MKP-----PKIPF-MPLLLKDVTFI-----
-----HEGNK--TFL-----D---NLVNFE-KLHMIADTV---RTL RHCR TNQFGGDI
SPKE-----HPELKSIVVHH-LYVIDSQQALFELSHR---IEPR
>Rapgef5_[Bos_mutus]_440901494
---DLALELMNFDWSLFSSIHEQ---ELI-----YFTFS-RQGS--G-E-----HTA-
-----NLSLLLQRCNEVQLWVATEIILLCSPLGKRVQLVKKFIKIA-
AHCKA-QRNLNSFFAIVMGLNTASVSRLSQTWEKIPGKFKKLFSELESLTDP SLNHKAYR
DAFKK--MKP-----PKIPF-MPLLLKDVTFI-----
-----HEGNK--TFL-----D---NLVNFE-KLHMIADTV---RTL RHCR TNQFGGDI
CPKE-----HPELKSIVVHH-LYVIDSQQALFELSHR---IEPR
>Rapgef5_[Bos_taurus]_741875903
---DLALELMNFDWSLFSSIHEQ---ELI-----YFTFS-RQGS--G-E-----HTA-
-----NLSLLLQRCNEVQLWVATEIILLCSPLGKRVQLVKKFIKIA-
AHCKA-QRNLNSFFAIVMGLNTASVSRLSQTWEKIPGKFKKLFSELESLTDP SLNHKAYR
DAFKK--MKP-----PKIPF-MPLLLKDVTFI-----
-----HEGNK--TFL-----D---NLVNFE-KLHMIADTV---RTL RHCR TNQFGGDI
SPKE-----HPELKSIVVHH-LYVIDSQQALFELSHR---IEPR
>Rapgef5_[Bubalus_bubalis]_594103843
---DLALELMNFDWSLFNSIHEQ---ELI-----YFTFS-RQGS--G-E-----HTV-
-----NLSLLLQRCNEVQLWVATEIILLCSPLGKRVQLVKKFIKIA-
AHCKA-QRNLNSFFAIVMGLNTASVSRLSQTWEKIPGKFKKLFSELESLTDP SLNHKAYR
DAFKK--MKP-----PKIPF-MPLLLKDVTFI-----
-----HEGNK--TFL-----D---NLVNFE-KLHMIADTV---RTL RHCR TNQFGGDV
SPKE-----HPELKSIVVHH-LYIIDSQQALFELSHR---IEPR
>Rapgef5_[Buceros_rhinoceros_silvestris]_676709688
----LAVELTNFDWSLFNAIHEQ---ELI-----YFTFS-RQGS--A-E-----NTE-
-----NLSLLLQRCNEVQLWVATEIILLCSQLCKRVQLVKKFIKIA-
AHCKA-QRNLNSFFAIVMGLNTASVSRLSQTWEKIPGKFKKLFTELESL-----
-----
-----
-----
>Rapgef5_[Calidris_pugnax]_960957042
---DLALELTNFDWSLFNAIHEQ---ELI-----YFTFS-RQGS--A-E-----NTE-
-----NLSLLLQRCNEVQLWVATEIILLCSQLCKRVQLVKKFIKIA-
AHCKA-QRNLNSFFAIVMGLNTASVSRLSQTWEKIPGKFKKLFTELESLTDP SLNHKAYR
DAFKK--MKS-----PKIPF-MPLLLKDVTFI-----
-----HEGNK--TFL-----D---NLVNFE-KLHMIADTV---RSL RHCR NNQFGNEV
PSKE-----HHELKPYVHH-LHVIDNQQALFELSHR---IEPR
>Rapgef5_[Callorhinchus_milii]_632937910
----MANELTSFDWDLFNCICEQ---ELI-----CYIFR-RQDS--GRS-----TV-
-----NLNLLLQRCNEVQFWVATEIILLCSQLSKRVQLVKKFIKIA-
AHCRA-LRNLNSFFAIIMGLNSAAVCRLGQTWEKVPGKFKRLFSELENLTDP SLNHKAYR
DAFKK--MQA-----PKIPF-MPLLLKDVTFI-----
-----HEGNK--TFL-----D---NLVNFQ-KLHMIADTV---RLL RHCR SNQSSTEG
TYKE-----HQQDVKTYIQY-LHIIDNQQMLFQLSHR---LEPR
>Rapgef5_[Calypste_anna]_663262517
---DLALELTNFDWSLFNAIHEQ---ELI-----YFTFS-RQGS--A-E-----NTE-
-----NLSLLLQRCNEVQLWVATEIILLCSQLCKRVQLVKKFIKIA-
AHCKA-QRNLNSFFAIVMGLNTASVSRLSQTWEKIPGKFKKLFTELESLTDP SLNHKAYR

```

DAFKK--MKS-----PKIPF-MPLLLKDVTFI-----  
 -----HEGNK--TFL-----D---NLVNFE-KLHMIADTV---RSLRHCRRNQFGNEV  
 PSKD-----HHELKPYVHH-LHVIDNQALFELSHR---IEPR  
 >Rapgef5\_[Camelus\_bactrianus]\_743744586  
 ---DLALELMNFDWSLFNSIHEQ---ELI-----YFTFS-RQGG--G-E-----HTM--  
 -----NLSFLLQRCNEVQLWVATEILLCSQLGKRVQLVKKFIKIA-  
 AHCKA-QRNLNSFFAIVMGLNTASVSRLSQTWEKIPGKFKKLFSELESITDPSLNHKAYR  
 DAFKK--MKP-----PKIPF-MPLLLKDVTFI-----  
 -----HEGNK--TFL-----D---NLVNFE-KLHMIADTV---RTLRLHCRTNQFGGDM  
 SPKE-----HQELKSYVNH-LYVIDSQQSLFELSHR---IEPR  
 >Rapgef5\_[Camelus\_dromedarius]\_744578310  
 ---DLALELMNFDWSLFNSIHEQ---ELI-----YFTFS-RQGG--G-E-----HTM--  
 -----NLSFLLQRCNEVQLWVATEILLCSQLGKRVQLVKKFIKIA-  
 AHCKA-QRNLNSFFAIVMGLNTASVSRLSQTWEKIPGKFKKLFSELESITDPSLNHKAYR  
 DAFKK--MKP-----PKIPF-MPLLLKDVTFI-----  
 -----HEGNK--TFL-----D---NLVNFE-KLHMIADTV---RTLRLHCRTNQFGGDM  
 SPKE-----HQELKSYVNH-LYVIDSQQSLFELSHR---IEPR  
 >Rapgef5\_[Capra\_hircus]\_926689784  
 ---DLALELMNFDWSLFNSIHEQ---ELI-----YFTFS-RQGS--G-E-----HTV--  
 -----NLSLLLQRCNEVQLWVATEILLCSPLGKRVQLVKKFIKIA-  
 AHCKA-QRNLNSFFAIVMGLNTASVSRLSQTWEKIPGKFKKLFSELESITDPSLNHKAYR  
 DAFKK--MKP-----PKIPF-MPLLLKDVTFI-----  
 -----HEGNK--TFL-----D---NLVNFE-KLHMIADTV---RTLRLHCRTNQFGGDM  
 SPKE-----HPELKSYVHH-LYVIDSQQALFELSHR---IEPR  
 >Rapgef5\_[Caprimulgus\_carolinensis]\_704331329  
 ---DLALELTNFDWSLFNAIHER---ELI-----YFTFS-RQGS--A-E-----NTE--  
 -----NLSLLLQRCNEVQLWVATEILLCSPLCKRVQLVKKFIKIA-  
 AHCKA-QRNLNSFFAIVMGLNTASVSRLSQTWEKIPGKFKKLFTELESITDPSLNHKAYR  
 DAFKK--MKS-----PKIPF-MPLLLKDVTFI-----  
 -----HEGNK--TFL-----D---NLVNFE-KLHMIADTV---RSLRHCRRNQFGNEV  
 PSKE-----HHELKPYIHH-LHVIDNQALFELSHR---IEPR  
 >Rapgef5\_[Carlito\_syricha]\_640775670  
 ---DLALELMNFDWSLFNSIHEQ---ELI-----YFTFS-RQGS--G-E-----HTA--  
 -----NLSLLLQRCNEVQLWVATEILLCSQLGKRVQLVKKFIKIA-  
 AHCKA-QRNLNSFFAIVMGLNTASVSRLSQTWEKIPGKFKKLFSELESITDPSLNHKAYR  
 DAFKK--MKS-----PKIPF-MPLLLKDVTFI-----  
 -----HEGNK--TFL-----D---NLVNFE-KLHMIADTV---RTLRLHCRTSQFGGDL  
 SPKE-----HQELKSYVNH-LYIIDNQALFELSHR---IEPR  
 >Rapgef5\_[Cebus\_capucinus\_imitator]\_1044353746  
 ---DLALELMNFDWSLFNSIHEQ---ELI-----YFTFS-RQGS--G-E-----HTA--  
 -----NLSLLLQRCNEVQLWVATEILLCSQLGKRVQLVKKFIKIA-  
 AHCKA-QRNLNSFFAIVMGLNTASVSRLSQTWEKIPGKFKKLFSELESITDPSLNHKAYR  
 DAFKK--MKP-----PKIPF-MPLLLKDVTFI-----  
 -----HEGNK--TFL-----D---NLVNFE-KLHMIADTV---RTLRLHCRTNQFG-DL  
 SPKE-----HQELKSYVNH-LYVIDSQQALFELSHR---IEPR  
 >Rapgef5\_[Ceratotherium\_simum\_simum]\_478489217  
 ---DLALELMNFDWSLFNSIHEQ---ELI-----YFTFS-RQGS--G-E-----HTV--  
 -----NLSLLLQRCNEVQLWVATEILLCSQLGKRVQLVKKFIKIA-  
 AHCKA-QRNLNSFFAIVMGLNTASVSRLSQTWEKIPGKFKKLFSELESITDPSLNHKAYR  
 DAFKK--MKP-----PKIPF-MPLLLKDVTFI-----  
 -----HEGNK--TFL-----D---NLVNFE-KLHMIADTV---RTLRLHCRTNQFGSDM  
 SPKE-----HQELKSYVNH-LYVIDSQQALFELSHR---IEPR  
 >Rapgef5\_[Chaetura\_pelagica]\_701358577  
 ---DLALELTNFDWSLFNAIHEQ---ELI-----YFTFS-RQGS--A-E-----NTE--

```

-----NLSLLLQRCNEVQLWVATEILLCSQLCKRVQLVKKFIKIA-
AHCKA-QRNLNSFFAIVMGLNTASVSRLSQTWEKIPGKFKKLFTELES�TDPSLNHKAYR
DAFKK--MKS-----PKIPF-MPLLLKDVTFI-----
-----HEGNK--TFL-----D---NLVNFE-KLHMIADTV---RSLRHCRNNQFGNEV
PSKE-----HHELKPYVHH-LHVIDNQQALFELSHR---IEPR
>Rapgef5_[Charadrius_vociferus]_699639499
---DLALELTNFDWSLFNAIHEQ---ELI-----YFTFS-RQGS--A-E-----NTE--
-----NLSLLLQRCNEVQLWVATEILLCSQLCKRVQLVKKFIKIA-
AHCKA-QRNLNSFFAIVMGLNTASVSRLSQTWEKIPGKFKKLFTELES�TDPSLNHKAYR
DAFKK--MKS-----PKIPF-MPLLLKDVTFI-----
-----HEGNK--TFL-----D---NLVNFE-KLHMIADTV---RSLRHCRNNQFGNEV
PSKE-----HHELKPYVHH-LHVIDNQQALFELSHR---IEPR
>Rapgef5_[Chelonia_mydas]_465962692
-----ELI-----YFTFS-RQGS--G-E-----NTV--
-----NLSLLLQRCNEVQLWVATEILLCSQLCKRVQLVKKFIKIA-
AHCKA-QRNLNSFFAIVMGLNTASVSRLSQTWEKIPGKFKKLFTELES�TDPSLNHKAYR
DTFKK--MKS-----PKIPF-MPLLLKDVTFI-----
-----HEGNK--TFL-----D---NLVNFE-KLHMIADTV---RSLRHCRNNQCGNEV
PPKE-----NQELKPHVYH-LHVIDDQQTFLFELSHR---IEPR
>Rapgef5_[Chinchilla_lanigera]_533124335
---DLALELMNFDWSLFNSIHEQ---ELI-----YFTFS-RQGS--G-E-----HTV--
-----NLSLLLQRCNEVQLWVATEILLCSQLGKRVQLVKKFIKIA-
AHCKA-QRNLNSFFAIVMGLNTASVSRLSQTWEKIPGKFKKLFSELES�TDPSLNHKAYR
DAFKK--MKP-----PKIPF-MPLLLKDVTFI-----
-----HEGNK--TFL-----D---NLVNFE-KLHMIADTV---RTL RHCR TNQFGSDM
SPKE-----HHELKSYVTH-LYVIDSQQALFELSHR---LEPR
>Rapgef5_[Chlamydotis_macqueenii]_705662260
---DLALELTNFDWSLFNAIHEQ---ELI-----YFTFS-RQGS--A-E-----NTE--
-----NLSLLLQRCNEVQLWVATEVLLCSQLCKRVQLVKKFIKIA-
AHCKA-QRNLNSFFAIVMGLNTASVSRLSQTWEKIPGKFKKLFTELES�TDPSLNHKAYR
DAFKK--MKS-----PKIPF-MPLLLKDVTFI-----
-----HEGNK--TFL-----D---NLVNFE-KLHMIADTV---RSLRHCRNNQFGNEV
PSKE-----HHELKPYVHH-LHVIDNQQALFELSHR---IEPR
>Rapgef5_[Chrysochloris_asiatica]_586448209
---DLALELMNFDWSLFNSIHEQ---ELI-----YFTFS-RQGN--G-E-----HTV--
-----NLSLLLQRCNEVQLWVATEILLCSQLGKRVQLVKKFIKIA-
AHCKA-QKNLNSFFAIVMGLNTASVSRLSQTWEKIPGKFKKLFTELENLTDPSLNHKAYR
DAFKK--MKP-----PKIPF-MPLLLKDVTFI-----
-----HEGNK--TFL-----D---NLVNFE-KLHMIADTV---RTL RHCR TNQFG-DM
SPKE-----HQELKSYVNH-LYVIDSQQALFELSHR---IEPR
>Rapgef5_[Colius_striatus]_706151331
---DLALELTNFDWSLFNAIHEQ---ELI-----YFTFS-RQGS--A-E-----NTE--
-----NLSLLLQRCNEVQLWVATEILLCSQLCKRVQLVKKFIKIA-
AHCKA-QRNLNSFFAIVMGLNTASVSRLSQTWEKIPGKFKKLFTELES�TDPSLNHKAYR
DAFKK--MKS-----PKIPF-MPLLLKDVTFI-----
-----HEGNK--TFL-----D---NLVNFE-KLHMIADTV---RSLRHCRNNQFGNEV
PSKE-----HHELKPYIHH-LHVIDNQQALFELSHR---IEPR
>Rapgef5_[Colobus_angolensis_palliatus]_795175182
---DLALELMNFDWSLFNSIHEQ---ELI-----YFTFS-RQGS--G-E-----HTA--
-----NLSLLLQRCNEVQLWVATEILLCSQLGKRVQLVKKFIKIA-
AHCKA-QRNLNSFFAIVMGLNTASVSRLSQTWEKIPGKFKKLFSELES�TDPSLNHKAYR
DAFKK--MKP-----PKIPF-MPLLLKDVTFI-----
-----HEGNK--TFL-----D---NLVNFE-KLHMIADTV---RTL RHCR TNQFG-DL
CPKE-----HQELKSYVNH-LYVIDSQQALFELSHR---IEPR

```

```

>Rapgef5_[Columba_livia]_543740235
---DLALELTNFDWSLFNAIHEQ---ELI-----YFTFS-RQGS--A-E-----NTE--
-----NLSLLLQRCNEVQLWVATEILLCSQLCKRVQLVKKFIKIA-
AHCKA-QRNLNSFFAIVMGLNTASVSRLSQTWEKIPGKFKKLFTELESITDPSLNHKAYR
DAFKK--MKS-----PKIPF-MPLLLKDVTFI-----
-----HEGNK--TFL-----D---NLVNFE-KLHMIADTV---RSLRHCRRNNQFGNEV
PSKE-----HHELKPYVHH-LHVIDNQALFELSHR---IEPR
>Rapgef5_[Condylura_cristata]_829998867
---DLALELMNFDWNLFNSIHEQ---ELI-----YFTFS-RQGS--G-E-----HTA--
-----NLSLLLQRCNEVQLWVATEILLCSQLGKRVQLVKKFIKIA-
AHCKA-QRNLNSFFAIVMGLNTASVSRLSQTWEKIPGKFKKLFSELESITDPSLNHKAYR
DAFKK--MKP-----PKIPF-MPLLLKDVTFI-----
-----HEGNK--TFL-----D---NLVNFE-KLHMIADTV---RTLRCRRTNQLGGDM
SSKE-----HQELKSYVNH-LYVIDNQALFELSHR---IEPR
>Rapgef5_[Corvus_brachyrhynchos]_669274841
---DLALELTNFDWSLFNAIHEQ---ELI-----YFTFS-RQGS--A-E-----NTE--
-----NLSLLLQRCNEVQLWVATEILLCSQLCKRVQLVKKFIKIA-
AHCKA-QRNLNSFFAIVMGLNTASVSRLSQTWEKIPGKFKKLFTELESITDPSLNHKAYR
DAFKK--MKS-----PKIPF-MPLLLKDVTFI-----
-----HEGNK--TFL-----D---NLVNFE-KLHMIADTV---RSLRHCRRNNQFGNEV
PSKE-----HHELKPYVHH-LHVIDNQALFELSHR---IEPR
>Rapgef5_[Corvus_cornix_cornix]_727017011
---DLALELTNFDWSLFNAIHEQ---ELI-----YFTFS-RQGS--A-E-----NTE--
-----NLSLLLQRCNEVQLWVATEILLCSQLCKRVQLVKKFIKIA-
AHCKA-QRNLNSFFAIVMGLNTASVSRLSQTWEKIPGKFKKLFTELESITDPSLNHKAYR
DAFKK--MKS-----PKIPF-MPLLLKDVTFI-----
-----HEGNK--TFL-----D---NLVNFE-KLHMIADTV---RSLRHCRRNNQFGNEV
PSKE-----HHELKPYVHH-LHVIDNQALFELSHR---IEPR
>Rapgef5_[Coturnix_japonica]_1003750304
---DLALELTNFDWSLFNAIHEQ---ELI-----YFTFS-RQGS--A-E-----NTE--
-----NLSLLLQRCNEVQLWVATEILLCSQLCKRVQLVKKFIKIA-
AHCKA-QRNLNSFFAIVMGLNTASVSRLSQTWEKIPGKFKKLFTELESITDPSLNHKAYR
DAFKK--MKS-----PKIPF-MPLLLKDVTFI-----
-----HEGNK--TFL-----D---NLVNFE-KLHMIADTV---RSLRHCRRNNQFGNEV
PSKE-----HHELKPYIHH-LHVIDNQALFELSHR---IEPR
>Rapgef5_[Cricetulus_griseus]_537162100
---DLALELMSFDWSLFNSIHEQ---ELI-----YFTFS-RQGS--G-E-----HTV--
-----NLSLLLQRCNEVQLWVATEILLCSQLGKRVQLVKKFIKIA-
AHCKA-QQNLNSFFAIVMGLNTASVSRLSQTWEKIPGKFKKLFSELESITDPSLNHKAYR
DAFKK--MKP-----PKIPF-MPLLLKDVTFI-----
-----HEGNK--TFL-----D---NLVNFE-KLHMIADTV---RTLRCRRTNQFGSDM
SPKE-----QQELKSYVNH-LYVIDSQALFELSHR---LEPR
>Rapgef5_[Cynoglossus_semilaevis]_1035246651
---DVAVALTNFDWTIFNSIHEQ---QLV-----YFTFS-RHAG--SH-----HTV--
-----ALELLLQRCNEVQLWVMTEVLLCPTLCRRVQLIKKFIKIA-
AHCKA-QRNLNCFFAVIMGLNAAVGRLTQTWEKIPGKFKKLFSELETMTDPSLNHKAYR
DSFKK--MKA-----PKIPF-LPLLLKDITFI-----
-----HEGNK--TFH-----D---NLVNFE-KLHMIADTV---RLIRQCQTDPMGNSI
TQKS-----SPDVRAYVDY-LHIIDNQQTFLFELSHR---LEPR
>Rapgef5_[Cyprinodon_variegatus]_974049548
---DVAVALTNFDWTIFTRMHEQ---ELV-----YFTFN-RNVY--SS-----HTM--
-----QLELLLQRCNEVQLWVMTEVLLCPTPCKRVQLIKKFIKIA-
AHCKA-QRNLNSFFAIILGLNAAVSRSLSQTWEKIPGKFKKLFSELEAVTDPSLNHKVYR
ESFKK--MKS-----PKIPF-LPLLLKDITFI-----

```

-----HEGNK--TFH-----D---NLVNFE-KLHMIADMA---RFIRDCCQDHLGNGI  
AQKS-----SSEVQAYTDY-LHIIDNQQTLEFELSHR---LEPR  
>Rapgef5\_[Danio\_rerio]\_326676397  
---DVAVALTNFDWNLFNSIHEQ----ELI-----FYTFS-RQAS--SG-----HTV--  
-----ALEFLLQRCNEVQQWVMSEVLLCPSLSKRVQLLKKFIKIA-  
AHCKA-QRNLNSSFAIIMGLNTAAVSRLNQTWEKVPKGFKKLFSELELLTDPSMNHKAYR  
DAFKK--MKP-----PKIPF-MPLLLKDITFI-----  
-----HEGNK--TFH-----D---NLVNFE-KLHMIADTV---RLIRHCQMDQTGNEL  
SAVD-----SAEVRSSVHY-LHIIDNQQTLEFELSHR---LEPR  
>Rapgef5\_[Dasypus\_novemcinctus]\_488539542  
---DLALELMNFDWSLFNSIHEQ----ELI-----YFTFS-RQGS--G-E-----HTV--  
-----NLSLLLQRCNEVQLWVATEILLCSQLGKRVQLVKKFIKIA-  
AHCKA-QRNLNSFFAIVMGLNAAVSRLAQTWEKIPKGFKKLFSELESITDPSLNHKAYR  
DAFKK--MKP-----PKIPF-MPLLLKDVTFI-----  
-----HEGNK--TFL-----D---NLVNFE-KLHMIADTV---RTL RHCR TNQFGGDM  
SPKE-----HQELKAYVNH-LYVIDSQQALFELSHR---IEPR  
>Rapgef5\_[Dipodomys\_ordii]\_852771935  
---DLALELMNFDWSLFNSIHEQ----ELI-----YFTFS-RQGN--G-E-----HTV--  
-----NLSLLLQRCNEVQLWVATEILLCSQLGKRVQLVKKFIKIA-  
AHCKA-QRNLNSFFAIVMGLNTASVSRLSQTWEKIPKGFKKLFSELESITDPSLNHKAYR  
DAFKK--MKP-----PKIPF-MPLLLKDVTFI-----  
-----HEGNK--TFL-----D---NLVNFE-KLHMIADTV---RTL RHCR ANQFGGDV  
SPKE-----HQELKSYVTH-LYVIDSQQALFELSHR---LEPR  
>Rapgef5\_[Echinops\_telfairi]\_850284753  
---DLALELMHFDWSLFNAIHEQ----ELI-----YFTFS-RQGS--N-E-----HTA--  
-----NLSLLLQRCNELQLWVATEILLCSQLGKRVQLVKKLIKIA-  
AHCKA-QRNLNSFFAIVMGLNTASVSRLSQTWEKIPKGFKKLFSELESITDPSLNHKAYR  
DAFKK--MKP-----PKIPF-MPLLLKDVTFI-----  
-----HEGNK--TFL-----D---NLVNFE-KLHMIADTV---RTL RHCR TNLFDEE-  
-----  
>Rapgef5\_[Egretta\_garzetta]\_697833102  
---DLALELTNFDWSLFNAIHEQ----ELI-----YFTFS-RQGS--A-E-----NTE--  
-----NLSLLLQRCNEVQLWVATEILLCSQLCKRVQLVKKFIKIA-  
AHCKA-QRNLNSFFAIVMGLNTASVSRLSQTWEKIPKGFKKLFTELESITDPSLNHKAYR  
DAFKK--MKS-----PKIPF-MPLLLKDVTFI-----  
-----HEGNK--TFL-----D---NLVNFE-KLHMIADTV---RSLRHCRNNQFGNEV  
PSKE-----HHELKPYVHH-LHVIDNQQALFELSHR---IEPR  
>Rapgef5\_[Elephantulus\_edwardii]\_585640271  
---DLALELMNFDWSLFNAIHEQ----ELI-----YFTFS-RQGS--G-E-----HTV--  
-----NLSLLLQRCNEVQLWVATEILLCSQLGKRVQLVKKFIKIA-  
AHCKA-QRNLNSFFAIVMGLNTASVSRLAQTWEKIPKGFKKLFSELESITDPSLNHKAYR  
DAFKK--MKP-----PKIPF-MPLLLKDVTFI-----  
-----HEGNK--TFL-----D---NLVNFE-KLHMIADTV---RTL RHCR TNQFG-DV  
SPKE-----HQELKSYVNH-LYVIDSQQALFELSHR---IEPR  
>Rapgef5\_[Eptesicus\_fuscus]\_641693066  
---DLALELMNFDWSLFNSIHEQ----ELI-----YFTFS-RQGS--G-E-----HTA--  
-----NLSLLLQRCNEVQLWVATEILLCSQLGKRVQLVKKFIKIA-  
AHCKA-QRNLNSFFAIVMGLNTASVSRLSQTWEKIPKGFKKLFSELESITDPSLNHKAYR  
DAFKK--MKP-----PKIPF-MPLLLKDVTFI-----  
-----HEGNK--TFL-----D---NLVNFE-KLHMIADTV---RTL RHCR ANQCGGDV  
SPKE-----HHELKSYVTH-LFVIDSQQALFELSHR---IEPR  
>Rapgef5\_[Equus\_asinus]\_958806827  
---DLALELMNFDWSLFNSIHEQ----ELI-----YFTFS-RQGS--G-E-----HTV--  
-----NLSLLLQRCNEVQLWVATEILLCSQLGKRVQLVKKFIKIA-

AHCKA-QRNLNSFFAIVMGLNTASVSRLSQTWEKIPGKFKKLFSELESSTDPSLNHKAYR  
DAFKK--MKP-----PKIPF-MPLLLKDVTFI-----  
-----HEGNK--TFL-----D---NLVNFE-KLHMIADTV---RTL RH CRTN QFGSDV  
SPKE-----H QELKSHVNH-LYVIDSQQALFELSHR---IEPR  
>Rapgef5\_[Equus\_caballus]\_194209713  
---DLALELMNLDWSLSTSIHEQ---ELI-----YFTFS-RQGS--G-E-----HTV--  
-----NLSLLLQRCNEVQLWVATEILLCSQLGKRVQLVKKFIKIA-  
AHCKA-QRNLNSFFAIVMGLNTASVSRLSQTWEKIPGKFKKLFSELESSTDPSLNHKAYR  
DAFKK--MKP-----PKIPF-MPLLLKDVTFI-----  
-----HEGNK--TFL-----D---NLVNFE-KLHMIADTV---RTL RH CRTN QFGSDV  
SPKE-----H QELKSHVNH-LYVIDSQQALFELSHR---IEPR  
>Rapgef5\_[Equus\_przewalskii]\_664704334  
---DLALELMNFDWSLFNSIHEQ---ELI-----YFTFS-RQGS--G-E-----HTV--  
-----NLSLLLQRCNEVQLWVATEILLCSQLGKRVQLVKKFIKIA-  
AHCKA-QRNLNSFFAIVMGLNTASVSRLSQTWEKIPGKFKKLFSELESSTDPSLNHKAYR  
DAFKK--MKP-----PKIPF-MPLLLKDVTFI-----  
-----HEGNK--TFL-----D---NLVNFE-KLHMIADTV---RTL RH CRTN QFGSDV  
SPKE-----H QELKSHVNH-LYVIDSQQALFELSHR---IEPR  
>Rapgef5\_[Erinaceus\_europaeus]\_1016649020  
---DLALELMNFDWNLFNSIHEQ---ELI-----YFTFS-RQGN--G-E-----HTV--  
-----NLSLLLQRCNEVQLWVATEILLCSQLGKRVQLVKKFIKIA-  
AHCKA-QRNLNSFFAIVMGLNTASVSRLSQTWEKIPGKFKKLFSELESSTDPSLNHKAYR  
DAFKK--MKP-----PKIPF-MPLLLKDVTFI-----  
-----HEGNK--TFL-----D---NLVNFE-KLHMIADTV---RTL RH CRTS QFG-DV  
SPKE-----H QELKSYVNN-LYVIDSQQALFELSHR---IEPR  
>Rapgef5\_[Esox\_lucius]\_884972983  
---DIAVSLTNFDWSIFNSIHEQ---ELV-----YFTFS-RHAS--GG-----HTA--  
-----ALELLLQRCNEVQLWVMTEVLLCSTLSKRVQLIKKFIKIA-  
AHCKV-QRNLHSFFAIVMGLNTAAVSRLSQTWEKVPKGFKKLFSELEMLTDPSLNHKAYR  
DALKK--MKT-----PKIPF-LPLLLKDITFI-----  
-----HEGNK--TFL-----D---NLVNFE-KLHMIADTA---RLIRHCQEDHTGYEM  
PQKS-----GPEVRAYVDY-LHVIDNQQTFLFELSHR---LEPR  
>Rapgef5\_[Falco\_cherrug]\_929428232  
---DLALELTNFDWSLFNAIHEQ---ELI-----YFTFS-RQGS--A-E-----NTE--  
-----NLSLLLQRCNEVQLWVATEILLCSQLCKRVQLVKKFIKIA-  
AHCKA-QRNLNSFFAIVMGLNTASVSRLSQTWEKIPGKFKKLFTELESSTDPSLNHKAYR  
DAFKK--MKS-----PKIPF-MPLLLKDVTFI-----  
-----HEGNK--TFL-----D---NLVNFE-KLHMIADTV---RSLRHCRNNQFGNEV  
PSKE-----HHELKPYIHH-LHVIDNQQALFELSHR---IEPR  
>Rapgef5\_[Falco\_peregrinus]\_529435002  
---DLALELTNFDWSLFNAIHEQ---ELI-----YFTFS-RQGS--A-E-----NTE--  
-----NLSLLLQRCNEVQLWVATEILLCSQLCKRVQLVKKFIKIA-  
AHCKA-QRNLNSFFAIVMGLNTASVSRLSQTWEKIPGKFKKLFTELESSTDPSLNHKAYR  
DAFKK--MKS-----PKIPF-MPLLLKDVTFI-----  
-----HEGNK--TFL-----D---NLVNFE-KLHMIADTV---RSLRHCRNNQFGNEV  
PSKE-----HHELKPYIHH-LHVIDNQQALFELSHR---IEPR  
>Rapgef5\_[Felis\_catus]\_755702256  
---DLALELMNFDWSLFNSIHEQ---ELI-----YFTFS-RQGS--G-E-----HTV--  
-----NLSLLLQRCNEVQLWVATEILLCGQLGKRVQLVKKFIKIA-  
AHCKA-QRNLNSFFAIVMGLNTASVSRLSQTWEKIPGKFKKLFSELESSTDPSLNHKAYR  
DAFKK--MKP-----PKIPF-MPLLLKDVTFI-----  
-----HEGNK--TFL-----D---NLVNFE-KLHMIADTV---RTL RH CRTN QFGGDM  
SPKE-----H QELKSYVNH-LYVIDSQQALFELSHR---IEPR  
>Rapgef5\_[Ficedula\_albicollis]\_524986500

```

---DLALELTNFDWSLFNAIHEQ---ELI-----YFTFS-RQGS--A-E-----NTE--
-----NLSLLLQRCNEVQLWVATEILLCSQLCKRVQLVKKFIKIA-
AHCKA-QRNLNSFFAIVMGLNTASVSRLSQTWEKIPGKFKKLFTELESITDPSLNHKAYR
DAFKK--MKS-----PKIPF-MPLLLKDVTFI-----
-----HEGNK--TFL-----D---NLVNFE-KLHMIADTV---RSLRHCRNNQFGNEV
PSKE-----HHELKPYVHH-LHVIDNQALFELSHR---IEPR
>Rapgef5_[Fulmarus_glacialis]_697038811
---DLALELTNFDWSLFNAIHEQ---ELI-----YFTFS-RQGS--A-E-----NTE--
-----NLSLLLQRCNEVQLWVATEILLCSQLCKRVQLVKKFIKIA-
AHCKA-QRNLNSFFAIVMGLNTASVSRLSQTWEKIPGKFKKLFTELESITDPSLNHKAYR
DAFKK--MKS-----PKIPF-MPLLLKDVTFI-----
-----HEGNK--TFL-----D---NLVNFE-KLHMIADTV---RSLRHCRNNQF---
-----
>Rapgef5_[Fundulus_heteroclitus]_831522848
---DVAVALTNFDWTIFNSMHEQ---ELV-----YFTFN-RNVC--SS-----HTK--
-----SLELLLQRCNEVQLWVMTEVLLCPTLCKRVQLIKKFIKIA-
AHCKA-QRNLNSFFSIIMGLNAAVSRLSQTWEKIPGKFKKHFSELETVTDPSLNHKAYR
DSFKK--MKS-----PKIPF-LPLVLKDITFI-----
-----HEGNK--TFH-----D---NLVNFE-KLHMIADMA---RFIRECQQDPVGNIG
AQKS-----SSEVRAYIDY-LHVIDNQQTFLFELSHR---LEPR
>Rapgef5_[Galeopterus_variegatus]_667318434
---DLALELMNFDWSLFNSIHEQ---ELI-----YFTFS-RQGS--G-E-----HTA--
-----NLSLLLQRCNEVQLWVATEILLCSQLGKRVQLVKKFIKIA-
AHCKA-QRNLNSFFAIVMGLNTASVSRLSQTWEKIPGKFKKLFSELESITDPSLNHKAYR
DAFKK--MKP-----PKIPF-MPLLLKDVTFI-----
-----HEGNK--TFL-----D---NLVNFE-KLHMIADTV---RTL RHCRTNQFGGDV
SPKE-----HQELRSYVNH-LYVIDSQALFELSHR---IEPR
>Rapgef5_[Gallus_gallus]_971381104
---DLALELTTFDWSLFNAIHEQ---ELI-----YFTFS-RQGS--A-E-----NTE--
-----NLSLLLQRCNEVQLWVATEILLCSQLCKRVQLVKKFIKIA-
AHCKA-QRNLNSFFAIVMGLNTASVSRLSQTWEKIPGKFKKLFTELESITDPSLNHKAYR
DAFKK--MKS-----PKIPF-MPLLLKDVTFI-----
-----HEGNK--TFL-----D---NLVNFE-KLHMIADTV---RSLRHCRNNQFGNEV
PSKE-----HHELKPYIHH-LHVIDNQALFELSHR---IEPR
>Rapgef5_[Gavia_stellata]_678189231
---DLAVALTNFDWSLFNAIHEQ---ELI-----YFTFS-RQGS--A-E-----NTE--
-----NLSLLLQRCNEVQLWVATEILLCSPLCKRVQLVKKFIKIA-
AHCKA-QRNLNSFFAIVMGLNTASVSRLSQTWEKIPGKFKKLFTELESITDPSLNHKAYR
DAFKK--MKS-----PKIPF-MPLLLKDVTFI-----
-----HEGNK--TFL-----D---NLVNFE-KLHMIADTV---RSLRHCRNNQFGNEV
PSKE-----HHELKPYVHH-LHVIDNQALFELSHR---IEPR
>Rapgef5_[Gorilla_gorilla_gorilla]_426355608
---DLALELMNFDWSLFNSIHEQ---ELI-----YFTFS-RQGS--G-E-----HTA--
-----NLSLLLQRCNEVQLWVATEILLCSQLGKRVQLVKKFIKIA-
AHCKA-QRNLNSFFAIVMGLNTASVSRLSQTWEKIPGKFKKLFSELESITDPSLNHKAYR
DAFKK--MKP-----PKIPF-MPLLLKDVTFI-----
-----HEGNK--TFL-----D---NLVNFE-KLHMIADTV---RTL RHCRTNQFG-DL
SPKE-----HQELKSYVNH-LYVIDSQALFELSHR---IEPR
>Rapgef5_[Haliaeetus_leucocephalus]_729758116
---DLALELTNFDWSLFNAIHEQ---ELI-----YFTFS-RQGS--A-E-----NTE--
-----NLSLLLQRCNEVQLWVATEILLCSQLCKRVQLVKKFIKIA-
AHCKA-QRNLNSFFAIVMGLNTASVSRLSQTWEKIPGKFKKLFTELESITDPSLNHKAYR
DAFKK--MKS-----PKIPF-MPLLLKDVTFI-----
-----HEGNK--TFL-----D---NLVNFE-KLHMIADTV---RSLRHCRNNQFGNEV

```

PSKE-----HHELKPYVHH-LHVIDNQALFELSHR---IEPR  
 >Rapgef5\_[Heterocephalus\_glaber]\_351695327  
 ---DLALELMSFDWSLFNSIHEQ---ELI-----YFTFS-RQGS--G-E-----HTV--  
 -----NLSLLLQRCNEVQLWVATEILLCTQLGKRVQLVKKFIKIA-  
 AHCKA-QRNLNSFFAIVMGLNTASVSRLSQTWEKIPGKFKKLFSELESITDPSLNHKAYR  
 DAFKK--MKP-----PKIPF-MPLLLKDVTFI-----  
 -----HEGNK--TFL-----D---NLVNFE-KLHMIADTV---RTL RH CRTNQFGGDM  
 SPKE-----HQELKSYVTH-LYVIDSQALFELSHR---LEPR  
 >Rapgef5\_[Ictalurus\_punctatus]\_1042325123  
 ---DVSVALTNLDWSLFNSVHEQ---ELV-----YYTFS-RQAS--SG-----HTV--  
 -----ALEQLLQRCNEVQQWVMSEVLLCPSLGKRVQLLKKFIKIA-  
 AHCKA-QRNLNSSFAIIMGLNTAAVSRLNQTWEKVPKGKFKKLFSELELLTDPSLNHKAYR  
 DAFRK--MKP-----PKIPF-MPLLLKDITFI-----  
 -----HEGNK--TFH-----D---NLVNFE-KLHMIADTV---RHIRHCQTEQTGSEV  
 APSD-----SVDMRSSVHY-LHIIDNQQTLEFELSHR---LEPR  
 >Rapgef5\_[Ictidomys\_tridecemlineatus]\_914912372  
 ---DLALELMNFDWNLFNSIHEQ---ELI-----YFTFS-RQGS--G-E-----HTV--  
 -----NLSLLLQRCNEVQLWVATEILLCSQLCKRVQLVKKFIKIA-  
 AHCKA-QRNLNSFFAIVMGLNTASVSRLSQTWEKIPGKFKKLFSELESITDPSLNHKAYR  
 DAFKK--MKP-----PKIPF-MPLLLKVSSLLINFLASPGPEFSLRGNPQEERRFKA  
 GGSEEENGSK--VGE-----A---ASVPEI-QQHMIADTV---RTL RH CRTNQFGGDV  
 SPKE-----HQELKSYVNH-LYVIDSQALFELSHR---LEPR  
 >Rapgef5\_[Lepisosteus\_oculatus]\_973139205  
 --KDLSDIMVRVFLLF--VFKQ---ELI-----HYTFG-QQGG--SRA-----AV--  
 -----GLELLLQRCDEVQMWMTTEILLCTQLCKRVQLVKKFVKIA-  
 AHCRA-QRNLNSFFAIVMGLNTAAVSRLSHTWEKVPKGFRKLFSELELLTDPSLNHKAYR  
 DAFKK--MKP-----PKIPF-MPLLLKDITFI-----  
 -----HEGNK--TFL-----D---NLVNFE-KLHMIADTV---RLVRHCQTDQLGSEG  
 GQKD-----SQEVSRYVHH-LHIIDNQALFELSHR---LEPR  
 >Rapgef5\_[Leptonychotes\_weddellii]\_585182469  
 ---DLALELMNFDWSLFNSIHEQ---ELI-----YFTFS-RQGS--G-E-----HTA--  
 -----NLSLLLQRCNEVQLWVATEILLCSQLGKRVQLVKKFIKIA-  
 AHCKA-QRNLNSFFAIVMGLNTASVSRLSQTWEKIPGKFKKLFSELESITDPSLNHKAYR  
 DAFKK--MKP-----PKIPF-MPLLLKDVTFI-----  
 -----HEGNK--TFL-----D---NLVNFE-KLHMIADTV---RTL RH CRTNQFG-DV  
 SPKE-----HQELKSYVNH-LYVIDSQALFELSHR---IEPR  
 >Rapgef5\_[Leptosomus\_discolor]\_700421164  
 ---DLALELTNFDWSLFNAIHEQ---ELI-----YFTFS-RQGS--A-E-----NTE--  
 -----NLSLLLQRCNEVQLWVATEILLCSQLCKRVQLVKKFIKIA-  
 AHCKA-QRNLNSFFAIVMGLNTASVSRLSQTWEKIPGKFKKLFTELESITDPSLNHKAYR  
 DAFKK--MKS-----PKIPF-MPLLLKDVTFI-----  
 -----HEGNK--TFL-----D---NLVNFE-KLHMIADTV---RSLRHCRNNQFGNEV  
 PSKE-----HHELKPYIHH-LHVIDNQALFELSHR---IEPR  
 >Rapgef5\_[Loxodonta\_africana]\_731461513  
 ---DLALELMNFDWSLFNSIHEQ---ELI-----YFTFS-RQGS--G-E-----HTV--  
 -----NLSLLLQRCNEVQLWVATEILLCSQLGKRVQLVKKFIKIA-  
 AHCKA-QRNLNSFFAIVMGLNTASVSRLSQTWEKIPGKFKKLFSELESITDPSLNHKAYR  
 DAFKK--MKP-----PKIPF-MPLLLKDVTFI-----  
 -----HEGNK--TFL-----D---NLVNFE-KLHMIADTV---RTL RH CRTNQFGGDV  
 SPKE-----HQELKSYVNH-LYVIDSQALFELSHR---IEPR  
 >Rapgef5\_[Macaca\_mulatta]\_302564833  
 ---DLALELMNFDWSLFNSIHEQ---ELI-----YFTFS-RQGS--G-E-----HTA--  
 -----NLSLLLQRCNEVQLWVATEILLCSQLGKRVQLVKKFIKIA-  
 AHCKA-QRNLNSFFAIVMGLNTASVSRLSQTWEKIPGKFKKLFSELESITDPSLNHKAYR



DAFKK--MKP-----PKIPF-MPLLLKDVTFI-----  
 -----HEGNK--TFL-----D---NLVNFE-KLHMIADTV---RTL RH CRTN QFG-DL  
 CPKE-----H QELKSYVNH-LYVIDSQ QALFELSHR---IEPR  
 >Rapgef5\_[Manacus\_vitellinus]\_679187018  
 ---DLALELTNFDWSLFNAIHEQ---ELI-----YFTFS-RQGN--A-E-----NTE--  
 -----NLSLLLQRCNEVQLWVATEILLCNQLCKRVQLVKKFIKIA-  
 AHCKA-QRNLNSFFAIVMGLNTASVSRLSQTWEKIPGKFKKLFTELES LTDPSLNHKAYR  
 DAFKK--MKS-----PKIPF-MPLLLKDVTFI-----  
 -----HEGNK--TFL-----D---NLVNFE-KLHMIADTV---RSLRHCRNNQFGNEV  
 PSKE-----HHELKPYVHH-LHVIDNQ QALFELSHR---IEPR  
 >Rapgef5\_[Mandrillus\_leucophaeus]\_795101220  
 ---DLALELMNFDWSLFNSIHEQ---ELI-----YFTFS-RQGS--G-E-----HTA--  
 -----NLSLLLQRCNEVQLWVATEILLCSQLGKRVQLVKKFIKIA-  
 AHCKA-QRNLNSFFAIVMGLNTASVSRLSQTWEKIPGKFKKLFSELES LTDPSLNHKAYR  
 DAFKK--MKP-----PKIPF-MPLLLKDVTFI-----  
 -----HEGNK--TFL-----D---NLVNFE-KLHMIADTV---RTL RH CRTN QFG-DL  
 CPKE-----H QELKSYVNH-LYVIDSQ QALFELSHR---IEPR  
 >Rapgef5\_[Marmota\_marmota\_marmota]\_984123699  
 ---DLALELMNFDWSLFNSIHEQ---ELI-----YFTFS-RQGS--G-E-----HTV--  
 -----NLSLLLQRCNEVQLWVATEILLCSQLCKRVQLVKKFIKIA-  
 AHCKA-QRNLNSFFAIVMGLNTASVSRLSQTWEKIPGKFKKLFSELES LTDPSLNHKAYR  
 DAFKK--MKP-----PKIPF-MPLLLKDVTFI-----  
 -----HEGNK--TFL-----D---NLVNFE-KLHMIADTV---RTL RH CRTN QFGGDV  
 SPKE-----H QELKSYVNH-LYVIDSQ QALFELSHR---LEPR  
 >Rapgef5\_[Maylandia\_zebra]\_939298992  
 ---DVAVALTDFDWAIFDAVHEQ---ELV-----YFTFN-RHAG--SN-----HTT--  
 -----ALEFLLQRCNDIQLWVMTEVLLCPTLCKRVQLIKKFIKIA-  
 AHCKA-QRNLNCFFAIIMGLNTAAVSRLSQTWEKVPKGFKRLFSELETVTDP SLN HKAYR  
 DSFKK--MKA-----PKIPF-LPLLLKDITFI-----  
 -----HEGNK--TFH-----D---NLVNFE-KLHMIADMV---RLIRQCQKDHMGNGI  
 TQKS-----SSEVRAYIDY-LHIIDNQ QTLFELSQR---LEPR  
 >Rapgef5\_[Meleagris\_gallopavo]\_733892768  
 ---DLALELTNFDWSLFNAIHEQ---ELI-----YFTFS-RQGS--A-E-----NTE--  
 -----NLSLLLQRCNEVQLWVATEILLCSQLCKRVQLVKKFIKIA-  
 AHCKA-QRNLNSFFAIVMGLNTASVSRLSQTWEKIPGKFKKLFTELES LTDPSLNHKAYR  
 DAFKK--MKS-----PKIPF-MPLLLKDVTFI-----  
 -----HEGNK--TFL-----D---NLVNFE-KLHMIADTV---RSLRHCRNNQFGNEV  
 PSKE-----HHELKPYIHH-LHVIDNQ QALFELSHR---IEPR  
 >Rapgef5\_[Melopsittacus\_undulatus]\_527270294  
 ---DLALELTNFDWSLFNAIHEQ---ELI-----CFTFG-RQGS--T-E-----NTE--  
 -----NLSLLLQRCNEVQLWVATEILLCSQLCKRVQLVKKFIKIA-  
 AHCKA-QRNLNSFFAIVMGLNTASVSRLSQTWEKIPGKFKKLFTELES LTDPSLNHKAYR  
 DAFKK--MKS-----PKIPF-MPLLLKDVTFI-----  
 -----HEGNK--TFL-----D---NLVNFE-KLHMIADTV---RSLRHCRNNQLGNEV  
 PSKE-----HHELKPYVHY-LHVIDNQ QALFELSHR---IEPR  
 >Rapgef5\_[Merops\_nubicus]\_675634486  
 ---DLALELTNFDWSLFNAIHEQ---ELI-----YFTFS-RQGS--A-E-----NTE--  
 -----NLSLLLQRCNEVQLWVATEILLCSQLCKRVQLVKKFIKIA-  
 AHCKA-QRNLNSFFAIVMGLNTASVSRLSQTWEKIPGKFKKLFTELES LTDPSLNHKAYR  
 DAFKK--MKS-----PKIPF-MPLLLKDVTFI-----  
 -----HEGNK--TFL-----D---NLVNFE-KLHMIADTV---RSLRHCRNNQF-----  
 -----  
 >Rapgef5\_[Mesocricetus\_auratus]\_880957321  
 -----

```

-----
-----MKP-----PKIPF-MPLLLKDVTFI-----
-----HEGNK--TFL-----D---NLVNFE-KLHMIADTV---RTL RH CRTN QFGSDM
-SP--KE-----QQELRSYVSH-LYVIDSQQALFELSHR---LEPR
>Rapgef5_[Microcebus_murinus]_829808826
---DLALELMNFDWSLFNSIHEQ---ELI-----YFTFS-RQGS--G-E-----HTA--
-----NLSLLLQRCNEVQLWVATEILLCSQLGKRVQLVKKFIKIA-
AHCKA-QRNLNSFFAIVMGLNTASVSRLSQTWEKIPGKFKKLFSELES LTDPSLNHKAYR
DAFKK--MKP-----PKIPF-MPLLLKDVTFI-----
-----HEGNK--TFL-----D---NLVNFE-KLHMIADTV---RTL RH CRTN QFGGDL
SPKE-----HQELKSYVNH-LYVIESQQALFELSHR---IEPR
>Rapgef5_[Microtus_ochrogaster]_531998388
---DLALELMSFDWSLFNSIHEQ---ELI-----YFTFS-RQGS--G-E-----HTV--
-----NLSLLLQRCNEVQLWVATEILLCSQLGKRVQLLKKFIKIA-
AHCKA-QQNLNSFFAIVMGLNTASVSRLSQTWEKIPGKFKKLFSELES LTDPSLNHKAYR
DAFKK--MKP-----PKIPF-MPLLLKDVTFI-----
-----HEGNK--TFL-----D---NLVNFE-KLHMIADTV---RTL RH CRSN QFGGDM
SPKE-----QHELKSYVNH-LYVIDSQQALFELSHR---LEPR
>Rapgef5_[Monodelphis_domestica]_1023030370
---DLAMELMNFDWSLFNSIHEQ---ELI-----YFTFS-RPGS--S-E-----NTV--
-----NLSLLLQRCNEVQLWVATEILLCSQLCKRVQLVKKFIKIA-
AHCKA-QRNLNSFFAIVMGLNTASVSRLSQTWEKIPGKFKKLFSELES LTDPSLNHKAYR
DAFKK--MKP-----PKIPF-MPLLLKDVTFI-----
-----HEGNK--TFL-----D---NLVNFE-KLHMIADTV---RSL RH CRNSH FGGDV
SPKE-----HQELRSYVHH-LHVIDNQQVLFELSHR---IEPR
>Rapgef5_[Mus_musculus]_238637293
---DLALELMSFDWSLFNSIHEQ---ELI-----YFTFS-RQGN--G-E-----NTV--
-----NLSLLLQRCNEVQLWVATEILLCSQLGKRVQLVKKFIKIA-
AHCKA-QQNLNSFFAIVMGLNTASVSRLSQTWEKIPGKFKKLFSELES LTDPSLNHKAYR
DAFKK--MKP-----PKIPF-MPLLLKDVTFI-----
-----HEGNK--TFL-----D---NLVNFE-KLHMIADTV---RTL RH CRTN QFGSDV
SPKE-----QQELKSYVNH-LYVIDSQQALFELSHR---LEPR
>Rapgef5_[Myotis_brandtii]_946777341
---DLALELMNFDWSLFNSIHEQ---ELI-----YFTFS-RQGS--G-E-----HTA--
-----NLSLLLQRCNEVQLWVATEILLCSQLGKRVQLVKKFIKIA-
AHCKA-QRNLNSFFAIVMGLNTASVSRLSQTWEKIPGKFKKLFSELES LTDPSLNHKAYR
DAFKK--MKP-----PKIPF-MPLLLKDVTFI-----
-----HEGNK--TFL-----D---NLVNFE-KLHMIADTV---RTL RH CRAN QFGGDM
SPKE-----HQELKSYVTH-LYVIDSQQALFELSHR---IEPR
>Rapgef5_[Myotis_davidii]_987976186
---DLALELMNFDWSLFNSIHEQ---ELI-----YFTFS-RQGS--G-E-----HTA--
-----NLSLLLQRCNEVQLWVATEILLCSQLGKRVQLVKKFIKIA-
AHCKA-QRNLNSFFAIVMGLNTASVSRLSQTWEKIPGKFKKLFSELES LTDPSLNHKAYR
DAFKK--MKP-----PKIPF-MPLLLKDVTFI-----
-----HEGNK--TFL-----D---NLVNFE-KLHMIADTV---RTL RH CRAN QFGGDM
SPKE-----HQELKSYVTH-LYVIDSQQALFELSHR---IEPR
>Rapgef5_[Myotis_lucifugus]_940733857
-----ELI-----YFTFS-RQGS--G-E-----HTA--
-----NLSLLLQRCNEVQLWVATEILLCSQLGKRVQLVKKFIKIA-
AHCKA-QRNLNSFFAIVMGLNTASVSRLSQTWEKIPGKFKKLFSELES LTDPSLNHKAYR
DAFKK--MKP-----PKIPF-MPLLLKDVTFI-----
-----HEGNK--TFL-----D---NLVNFE-KLHMIADTV---RTL RH CRAN QFGGDM
SPKE-----HQELKSYVTH-LYVIDSQQALFELSHR---IEPR

```

>Rapgef5\_[Neolamprologus\_brichardi]\_584013381  
---DVAVALTDFDWAIFDAVHEQ---ELV-----YFTFN-RHAG--SN-----HTT--  
-----ALEFLLQRCNDIQLWVMTEVLLCPTLCKRVQLIKKFIKIA-  
AHCKA-QRNLNCFFAIIMGLNTAAVSRLSQTWEKVPKGFKRLFSELETVTDPSLNHKAYR  
DSFKK--MKA-----PKIPF-LPLLLKDITFI-----  
-----HEGNK--TFH-----D---NLVNFE-KLHMIADMV---RLIRQCQKDHMGNGI  
TQKS-----SSEVRAYIDY-LHIIDNQQTLELSQR---LEPR  
>Rapgef5\_[Nestor\_notabilis]\_701296279  
---DLALELTMNFDWSLFNAIHEQ---ELI-----YFTFS-RQGS--A-E-----NTE--  
-----NLSLLLQRCNEVQLWVATEILLCSQLFKRVQLVKKFIKIA-  
AHCKA-QRNLNSFFAIVMGLNTASVSRLSQTWEKIPKGFKKLFTELESITDPSLNHKAYR  
DAFKK--MKS-----PKIPF-MPLLLK-----  
-----  
-----  
>Rapgef5\_[Nomascus\_leucogenys]\_332207210  
---DLALELMNFDWSLFNSIHEQ---ELI-----YFTFS-RQGS--G-E-----HTA--  
-----NLSLLLQRCNEVQLWVATEILLCSQLGKRVQLVKKFIKIA-  
AHCKA-QRNLNSFFAIVMGLNTASVSRLSQTWEKIPKGFKKLFSELESITDPSLNHKAYR  
DAFKK--MKP-----PKIPF-MPLLLKDVTFI-----  
-----HEGNK--TFL-----D---NLVNFE-KLHMIADTV---RTL RH CRTN QFG-DL  
SPKE-----HQELKSYVNH-LYVIDSQQALFELSHR---IEPR  
>Rapgef5\_[Nothobranchius\_furzeri]\_1007726540  
---DVAVALTSFDWTIFTSMHEQ---ELV-----YFTFT-RHVC--SN-----QNT--  
-----ALELLLQRCNEVQLWVMTEVLLCSTLCKRVQLIKKFIKIA-  
AHCKA-QKNLNSFFAIIMGLNAAVSRLSQTWEKIPKGFKKRLFSELETVTDPSLNHKAYR  
DSFKK--MKA-----PKIPF-LPLLLKDITFI-----  
-----HEGNR--TFH-----D---NLVNFE-KLHMIADMA---RLIRQCQADPVGNGI  
TQKS-----SSEVRAYVDN-LHVIDNQQTLELSHR---TEPR  
>Rapgef5\_[Odobenus\_rosmarus\_divergens]\_472355446  
---DLALELMNFDWSLFNSIHEQ---ELI-----YFTFS-RQGS--G-E-----HTA--  
-----NLSLLLQRCNEVQLWVATEILLCSQLGKRVQLVKKFIKIA-  
AHCKA-QRNLNSFFAIVMGLNTASVSRLSQTWEKIPKGFKKLFSELESITDPSLNHKAYR  
DAFKK--MKP-----PKIPF-MPLLLKDVTFI-----  
-----HEGNK--TFL-----D---NLVNFE-KLHMIADTV---RTL RH CRTN QFG-DV  
SPKE-----HQELKSYVNH-LYVIDSQQALFELSHR---IEPR  
>Rapgef5\_[Opisthocomus\_hoazin]\_700379874  
---DLALELTMNFDWSLFNAIHEQ---ELI-----YFTFS-RQGS--A-E-----NTE--  
-----NLSLLLQRCNEVQLWVATEILLCSQLCKRVQLVKKFIKIA-  
AHCKA-QRNLNSFFAIVMGLNTASVSRLSQTWEKIPKGFKKLFTELESITDPSLNHKAYR  
DAFKK--MKS-----PKIPF-MPLLLKDVTFI-----  
-----HEGNK--TFL-----D---NLVNFE-KLHMIADTV---RSLRHCRNNQFGNEV  
SSKE-----HHELKPYVHH-LYVIDNQQALFELSHR---IEPR  
>Rapgef5\_[Orcinus\_orca]\_465971427  
---DIALELMNFDWSLFNSIHEQ---ELI-----YFTFS-RQGS--G-D-----HTV--  
-----NLSLLLQRCNEVQLWVATEILLCSQLGKRVQLVKKFIKIA-  
AHCKA-QRNLNSFFAIVMGLNTASVSRLSQTWEKIPKGFKKLFSELESITDPSLNHKAYR  
DAFKK--MKP-----PKIPF-MPLLLKDVTFI-----  
-----HEGNK--TFL-----D---NLVNFE-KLHMIADTV---RTL RH CRT HQFG-DI  
SPKE-----HPELKSYVHH-LCVIDSQQALFALSHR---IEPR  
>Rapgef5\_[Oreochromis\_niloticus]\_542195430  
---DVAVALTDFDWAIFDEVHEQ---ELV-----YFTFN-RNAG--SN-----HTT--  
-----ALEFLLQRCNDIQLWVMTEVLLCPTLCKRVQLIKKFIKIA-  
AHCKA-QRNLNCFFAIIMGLNTAAVSRLSQTWEKVPKGFKRLFSELETVTDPSLNHKAYR  
DSFKK--MKA-----PKIPF-LPLLLKDITFI-----

-----HEGNK--TFH-----D---NLVNFE-KLHMIADTV---RLIRQCQKDHMGNGI  
TEKS-----SSEVRAYIDY-LHIIDNQQTLEFELSQR---LEPR  
>Rapgef5\_[Ornithorhynchus\_anatinus]\_620951764  
---DLALELMNFDWSLFNSIHEQ---ELI-----YFTFS-RQGS--S-E-----NTV--  
-----NLSLLLQRCNEVQLWVSTEILLCSQLCKRVQLVKKFIKIA-  
AHCKA-QRNLNSFFAIVMGLNTASISRLSQTWEKIPGKFKKLFSELESITDPSLNHKAYR  
DAFKK--MKP-----PKIPF-MPLLLKDVTFI-----  
-----HEGNK--TFL-----D---NLVNFE-KLHMIADTV---RSLRHCRNNQFGGEV  
SSKD-----HQELKSYVHH-LHIIDNQQALFELSHR---IEPR  
>Rapgef5\_[Orycteropus\_afer\_afer]\_634824811  
---DLALELMNFDWSLFNSIHEQ---ELI-----YFTFS-RQGS--G-E-----HTV--  
-----NLSLLLQRCNEVQLWVATEILLCSQLGKRVQLVKKFIKIA-  
THCKA-QRNLNSFFAIVMGLNTASVSRLSQTWEKIPGKFKKLFSELESITDPSLNHKAYR  
DAFKK--MKP-----PKIPF-MPLLLKDVTFI-----  
-----HEGNK--TFL-----D---NLVNFE-KLHMIADTV---RTL RHCRANQFG-DV  
SPKE-----HQELKSYVNH-LYVIDSQQALFELSHR---IEPR  
>Rapgef5\_[Oryzias\_latipes]\_432909226  
---DVAVALTDLDWTIFDSMHEQ---EVI-----YFTFN-RHVC--ST-----YTM--  
-----ALELLLQRCNEVQLWVMTEVLLCPTLCKRVQLIKKFIKIA-  
SHCKA-QRNLNCFFAIFMGLNAAVSRLSHTWEKVPKGFKKLFSELEAITDPSLNHKAYR  
ESLKK--MKV-----PKIPF-LPLLLKDITFI-----  
-----HEGNR--TFH-----N---NMVNFE-KLHMIADMV---RLIRQCQKDRMGNGI  
TQKS-----SSEVRAYIDC-LHVIDNQQTLEFELSHR---LEPR  
>Rapgef5\_[Ovis\_aries\_musimon]\_803284450  
---DLALELMNFDWSLFNSIHEQ---ELI-----YFTFS-RQGS--G-E-----HTV--  
-----NLSLLLQRCNEVQLWVATEILLCSPLGKRVQLVKKFIKIA-  
AHCKA-QRNLNSFFAIVMGLNTASVSRLSQTWEKIPGKFKKLFSELESITDPSLNHKAYR  
DAFKK--MKP-----PKIPF-MPLLLKDVTFI-----  
-----HEGNK--TFL-----D---NLVNFE-KLHMIADTV---RTL RHCRTNQFGGDM  
SPKE-----HPELKSIVHH-LYVIDSQQALFELSHR---IEPR  
>Rapgef5\_[Ovis\_aries]\_803062190  
---DLALELMNFDWSLFNSIHEQ---ELI-----YFTFS-RQGS--G-E-----HTV--  
-----NLSLLLQRCNEVQLWVATEILLCSPLGKRVQLVKKFIKIA-  
AHCKA-QRNLNSFFAIVMGLNTASVSRLSQTWEKIPGKFKKLFSELESITDPSLNHKAYR  
DAFKK--MKP-----PKIPF-MPLLLKDVTFI-----  
-----HEGNK--TFL-----D---NLVNFE-KLHMIADTV---RTL RHCRTNQFGGDM  
SPKE-----HPELKSIVHH-LYVIDSQQALFELSHR---IEPR  
>Rapgef5\_[Pan\_troglodytes]\_1034060316  
-----ELI-----YFTFS-RQGS--G-E-----HTA--  
-----NLSLLLQRCNEVQLWVATEILLCSQLGKRVQLVKKFIKIA-  
AHCKA-QRNLNSFFAIVMGLNTASVSRLSQTWEKIPGKFKKLFSELESITDPSLNHKAYR  
DAFKK--MKP-----PKIPF-MPLLLKDVTFI-----  
-----HEGNK--TFL-----D---NLVNFE-KLHMIADTV---RTL RHCRTNQFEED-  
-----  
>Rapgef5\_[Panthera\_tigris\_altaica]\_987416040  
---DLALELMNFDWSLFNSIHEQ---ELI-----YFTFS-RQGS--G-E-----HTV--  
-----NLSLLLQRCNEVQLWVATEILLCGQLGKRVQLVKKFIKIA-  
AHCKA-QRNLNSFFAIVMGLNTASVSRLSQTWEKIPGKFKKLFSELESITDPSLNHKAYR  
DAFKK--MKP-----PKIPF-MPLLLKDVTFI-----  
-----HEGNK--TFL-----D---NLVNFE-KLHMIADTV---RTL RHCRTNQFGGDM  
SPKE-----HQELKSYVNH-LYVIDSQQALFELSHR---IEPR  
>Rapgef5\_[Pantholops\_hodgsonii]\_556767097  
---DLALELMNFDWSLFNSIHEQ---ELI-----YFTFS-RQGS--G-E-----HTV--  
-----NLSLLLQRCNEVQLWVATEILLCSPLGKRVQLVKKFIKIA-

AHCKA-QRNLNSFFAIVMGLNTASVSRLSQTWEKIPGKFKKLFSELES LTDPSLNHKAYR  
DAFKK--MKP-----PKIPF-MPLLLKDVTFI-----  
-----HEGNK--TFL-----D---NLVNFE-KLHMIADTV---RTL RH CRTN QFG-DM  
SPKE-----HPEVKSYVHH-LHVIDSQQALFELSHR---IEPR  
>Rapgef5\_[Parus\_major]\_998665175  
---DLALELTNFDWSLFNAIHEQ---ELI-----YFTFS-RQGS--A-E-----NTE--  
-----NLSLLLQRCNEVQLWVATEILLCSQLCKRVQLVKKFIKIA-  
AHCKA-QRNLNSFFAIVMGLNTASVSRLSQTWEKIPGKFKKLFTELEN LTDPSLNHKAYR  
DAFKK--MKS-----PKIPF-MPLLLKDVTFI-----  
-----HEGNK--TFL-----D---NLVNFE-KLHMIADTV---RSLRHCRNNQFGNEV  
PSKE-----HHELKPYVHH-LHVIDNQQALFELSHR---IEPR  
>Rapgef5\_[Pelecanus\_crispus]\_694641940  
---DLALELTNFDWSLFNAIHEQ---ELI-----YFTFS-RQGS--A-E-----NTE--  
-----NLSLLLQRCNEVQLWVATEILLCSQLCKRVQLVKKFIKIA-  
AHCKA-QRNLNSFFAIVMGLNTASVSRLSQTWEKIPGKFKKLFTELES LTDPSLNHKAYR  
DAFKK--MKS-----PKIPF-MPLLLKDVTFI-----  
-----HEGNK--TFL-----D---NLVNFE-KLHMIADTV---RSLRHCRNNQFGNEV  
PSKE-----HHELKPYVHH-LHVIDNQQALFELSHR---IEPR  
>Rapgef5\_[Peromyscus\_maniculatus\_bairdii]\_1008780728  
---DLALELMSFDWSLFNSIHEQ---ELI-----YFTFS-RQGS--G-E-----HTV--  
-----NLSLLLQRCNEVQLWVATEILLCSQLGKRVQLVKKFIKIA-  
AHCRA-QQNLNSFFAIVMGLNTASVSRLSQTWEKIPGKFKKLFSELES LTDPSLNHKAYR  
DAFKK--MKP-----PKIPF-MPLLLKDVTFI-----  
-----HEGNK--TFL-----D---NLVNFE-KLHMIADTV---RTL RH CRSN QFGSDM  
SPKE-----QQELKSYVNH-LYVIDSQQALFELSHR---LEPR  
>Rapgef5\_[Phaethon\_lepturus]\_677491453  
---DLALELTNFDWSLFNAIHEQ---ELI-----YFTFS-RQGS--A-E-----NTE--  
-----NLSLLLQRCNEVQLWVATEILLCSQLCKRVQLVKKFIKIA-  
AHCKA-QRNLNSFFAIVMGLNTASVSRLSQTWEKIPGKFKKLFTELES LTDPSLNHKAYR  
DAFKK--MKS-----PKIPF-MPLLLKDVTFI-----  
-----HEGNK--TFL-----D---NLVNFE-KLHMIADTV---RSLRHCRNNQFGNEV  
PSKE-----HHELKPYVHH-LHVIDSQQALFELSHR---IEPR  
>Rapgef5\_[Physeter\_catodon]\_593712772  
---DIALELMNFDWSLFSSIHEQ---ELI-----YFTFS-RQGS--G-E-----HTV--  
-----NLSLLLQRCNEVQLWVATEILLCSQLGKRVQLVKKFIKIA-  
AHCKA-QRNLNSFFAIVMGLNTASVSRLSQTWEKIPGKFKKLFSELES LTDPSLNHKAYR  
DAFKK--MKP-----PKIPF-MPLLLKDVTFI-----  
-----HEGNK--TFL-----D---NLVNFE-KLHMIADTV---RTL RH CRTN QFGGDI  
SPKE-----HPELKSIVHH-LCVIDSQQALFALSHR---IEPR  
>Rapgef5\_[Poecilia\_formosa]\_617455312  
---DVAVALTNFDWTIFNSMHEQ---ELI-----YFTFN-RHVC--SS-----YTM--  
-----PLEMLLQQCNEVQLWVMTEVLLCPTLCKRVQLIKKFIKIA-  
AHCKA-QRNLNSFFAIIMGLNAGAVSRLSQTWEKIPGKFKKLFSELETVTDPSLNHKAYR  
DSFKK--MKS-----PKIPF-LPLLLKDITFI-----  
-----HEGNK--TFH-----D---NLVNFE-KLHMIADMA---RLIRECQQDHVGNGI  
AQKS-----SSEVRAYTDY-LHVIDNQQT LFELSHR---LEPR  
>Rapgef5\_[Poecilia\_mexicana]\_961877551  
---DVAVALTNFDWTIFNSMHEQ---ELI-----YFTFN-RHVC--SS-----YTM--  
-----PLEMLLQQCNEVQLWVMTEVLLCPTLCKRVQLIKKFIKIA-  
AHCKA-QRNLNSFFAIIMGLNAGAVSRLSQTWEKIPGKFKKLFSELETVTDPSLNHKAYR  
DSFKK--MKS-----PKIPF-LPLLLKDITFI-----  
-----HEGNK--TFH-----D---NLVNFE-KLHMIADMA---RLIRECQQDHVGNGI  
AQKS-----SSEVRAYTDY-LHVIDNQQT LFELSHR---LEPR  
>Rapgef5\_[Poecilia\_reticulata]\_658895691

```

---DVAVALTNFDWTIFNSMHEQ----ELI-----YFTFN-RHVC--SS-----YTM--
-----PLEMLLQQCNEVQLWVMTEVLLCPTLCKRVQLIKKFIKIA-
AHCKA-QRNLNSFFAIIMGLNAGAVSRLSQTWEKIPGKFKKLFSELEMVTDPSLNHKAYR
DSFKK--MKS-----PKIPF-LPLLLKDITFI-----
-----HEGNK--TFH-----D---NLVNFE-KLHMIADMA---RLIRECQDDHVGNGI
AQKS-----SSEVRAYTDY-LHVIDNQQTLELFSHR---LEPR
>Rapgef5_[Pongo_abelii]_686725649
---DLALELMNFDWSLFNSIHEQ----ELI-----YFTFS-RQGS--G-E-----HTA--
-----NLSLLLQRCNEVQLWVATEILLCSQLGKRVQLVKKFIKIA-
AHCKA-QRNLNSFFAIVMGLNTASVSRLSQTWEKIPGKFKKLFSELESITDPSLNHKAYR
DAFKK--MKP-----PKIPF-MPLLLKDVTFI-----
-----HEGNK--TFL-----D---NLVNFE-KLHMIADTV---RTLRLHCRTNQFG-DL
SPKE-----HQELKSYVNH-LYVIDSQQALFELFSHR---IEPR
>Rapgef5_[Protobothrops_mucrosquamatus]_1002574502
---NLALELTVFDWNLFNLVHEQ----ELI-----YFTFS-RQGS--G-K-----NTV--
-----NLSLLLQRCNEVQLWVATEILLCSQLCKRVQLVKKFIKIA-
AHCKA-QRNLNSFFAIVMGLNTASISRLSQTWERMPGKFKKLFAELESITDPSLNHKAYR
DAFKK--MKS-----PKIPF-MPLLLKDVTFI-----
-----HEGNK--TFL-----D---NLVNFE-KLHMIADTV---RSLRHCRRNQFGNDI
PSKE-----HEELKSYVHH-LRIIDNQQMLFELFSHR---IEPR
>Rapgef5_[Pseudopodoces_humilis]_929416305
---DLALELTVFDWSLFNAIHEQ----ELI-----YFTFS-RQGS--A-E-----NTE--
-----NLSLLLQRCNEVQLWVATEILLCSQLCKRVQLVKKFIKIA-
AHCKA-QRNLNSFFAIVMGLNTASVSRLSQTWEKIPGKFKKLFTESLESITDPSLNHKAYR
DAFKK--MKS-----PKIPF-MPLLLKDVTFI-----
-----HEGNK--TFL-----D---NLVNFE-KLHMIADTV---RSLRHCRRNQFGNEV
PSKE-----HHELKPYVHH-LHVIDNQQALFELFSHR---IEPR
>Rapgef5_[Pteropus_alecto]_989943388
---DLALELMNFDWCLFNSIHEQ----ELI-----YFTFS-RQGS--G-E-----HTV--
-----NLSLLLQRCNEVQLWVATEILLCSQLGKRVQLVKKFIKIA-
AHCKA-QRNLNSFFAIVMGLNTASVSRLSQTWEKIPGKFKKLFSELESITDPSLNHKAYR
DAFKK--MKP-----PKIPF-MPLLLKDVTFI-----
-----HEGNK--TFL-----D---NLVNFE-KLHMIADTV---RTLRLHCRTNQFGGEM
SPKE-----HQELKSYVNH-LYVIDSQQALFELFSHR---IEPR
>Rapgef5_[Pteropus_vampyrus]_759124282
---DLALELMNFDWCLFNSIHEQ----ELI-----YFTFS-RQGS--G-E-----HTV--
-----NLSLLLQRCNEVQLWVATEILLCSQLGKRVQLVKKFIKIA-
AHCKA-QRNLNSFFAIVMGLNTASVSRLSQTWEKIPGKFKKLFSELESITDPSLNHKAYR
DAFKK--MKP-----PKIPF-MPLLLKDVTFI-----
-----HEGNK--TFL-----D---NLVNFE-KLHMIADTV---RTLRLHCRTNQFGGEM
SPKE-----HQELKSYVNH-LYVIDSQQALFELFSHR---IEPR
>Rapgef5_[Python_bivittatus]_602660999
---DLALELTIFDWNLFNLVHEQ----ELI-----YFTFS-RQGS--G-K-----NTV--
-----NLSLLLQRCNEVQLWVATEILLCNQLCKRVQLVKKFIKIA-
AHCKA-QRNLNSFFAIVMGLNTASVSRLSQTWERMPGKFKKLFAELESITDPSLNHKAYR
DAFKK--MKS-----PKIPF-MPLLLKDVTFI-----
-----HEGNK--TFL-----D---NLVNFE-KLHMIADTV---RSLRHCRRNQFGNEI
PSKE-----HEELKSYVHH-LHIIDNQQMLFELFSHR---IEPR
>Rapgef5_[Rhinopithecus_roxellana]_724802520
---DLALELMNFDWSLFNSIHEQ----ELI-----YFTFS-RQGS--G-E-----HTA--
-----NLSLLLQRCNEVQLWVATEILLCSQLGKRVQLVKKFIKIA-
AHCKA-QRNLNSFFAIVMGLNTASVSRLSQTWEKIPGKFKKLFSELESITDPSLNHKAYR
DAFKK--MKP-----PKIPF-MPLLLKDVTFI-----
-----HEGNK--TFL-----D---NLVNFE-KLHMIADTV---RTLRLHCRTNQFG-DL

```

```
CPKE-----HQELKSYVNH-LYVIDSQQALFELSHR---IEPR
>Rapgef5_[Rousettus_aegyptiacus]_1012209897
---DLALELMNFDWCLFNSIHEQ---ELI-----YFTFS-RQGN--G-E-----HTV--
-----NLSLLLQRCNEVQLWVATEILLCSQLGKRVQLVKKFIKIA-
AHCKA-QRNLNSFFAIVMGLNTASVSRLSQTWEKIPGKFKKLFSELESLTDP SLNHKAYR
DAFKK--MKP-----PKIPF-MPLLLKDVTFI-----
-----HEGNK--TFL-----D---NLVNFE-KLHMIADTV--RTL RHCR TNQFGGEM
SPKE-----HQELKSYVNH-LYVIDSQQALFELSHR---IEPR
>Rapgef5_[Saimiri_boliviensis_boliviensis]_403287902
---DLALELMNFDWSLFNSIHEQ---ELI-----YFTFS-RQGS--G-E-----HTA-
-----NLSLLLQRCNEVQLWVATEILLCSQLGKRVQLVKKFIKIA-
AHCKA-QRNLNSFFAIVMGLNTASVSRLSQTWEKIPGKFKKLFSELESLTDP SLNHKAYR
DAFKK--MKP-----PKIPF-MPLLLKDVTFI-----
-----HEGNK--TFL-----D---NLVNFE-KLHMIADTV--RTL RHCR TNQFG-DL
SPKE-----HQELKSYVNH-LYVIDSQQALFELSHR---IEPR
>Rapgef5_[Salmo_salar]_929093147
---DVAVTLTNFDWSVFNSIHEQ---ELV-----YFTFS-RHAS--G-G-----HTV--
-----ALELLLQRCNEVQLWVMTEVLMCPTLCNRVQLIKKFIKIA-
AHCKA-QRNLNSFFAIVMGLNTAAVSRLSQTWE-----
-----
-----
-----
>Rapgef5_[Sarcophilus_harrisii]_821488958
---DLAMELMNFDWSLFNSIHEQ---ELI-----YFTFS-RQGS--S-E-----NTV--
-----NLSLLLQRCNEVQLWVATEILLCSQLCKRVQLVKKFIKIA-
AHCKA-QRNLNSFFAIVMGLNTASVSRLSQTWEKIPGKFKKLFSELESLTDP SLNHKAYR
DAFKK--MKP-----PKIPF-MPLLLKDVTFI-----
-----HEGNK--TFL-----D---NLVNFE-KLHMIADTV--RSL RHCR NNQFGGEV
SPKE-----HQELRSYVHH-LHVIDNQQVLFELSHR---IEPR
>Rapgef5_[Sinocyclocheilus_anshuiensis]_1024985992
---DVSVALTNFDWNLFNSIHEQ---ELI-----FYTFS-RQAS--SG-----HTV--
-----ALEFLLQRCNEVQQWVMSEVLLCPSLSKRVQLLKKFIKIA-
AHCKA-QRNLNSSFAIIMGLNTAAVSRLNQTWEKVPKGKFKKLFSELELLTDP SMNHKAYR
DAFKK--TKP-----PKIPF-MPLLLKDITFI-----
-----HEGNK--TFH-----D---SLVNFE-KLHMIADTV--RLIRHCQTDQTGNEL
SPCD-----SPEVRSSVHY-LHIIDNQQTLFELSHR---LEPR
>Rapgef5_[Sinocyclocheilus_grahami]_1020566004
---DVSVALTNFDWNLFNSIHEQ---ELI-----FYTFS-RQAS--SG-----HTV--
-----ALEFLLQRCNEVQQWVMSEVLLCPSLSKRVQLLKKFIKIA-
AHCKA-QRNLNSSFAIIMGLNTAAVSRLNQTWEKVPKGKFKKLFSELELLTDP SMNHKAYR
DAFKK--TKP-----PKIPF-MPLLLKDITFI-----
-----HEGNK--TFH-----D---NLVNFE-KLHMIADTV--RLIRHCQTDQTGNEL
SPCD-----SPEVRSSVHY-LHIIDNQQTLFELSHR---LEPR
>Rapgef5_[Sinocyclocheilus_rhinocerosus]_1025274731
---DVSVALTNFDWNLFNSIHEQ---ELI-----FYTFS-RQAS--SG-----HTV--
-----ALEFLLQRCNEVQQWVMSEVLLCPSLSKRVQLLKKFIKIA-
AHCKA-QRNLNSSFAIIMGLNTAAVSRLNQTWEKVPKGKFKKLFSELELLTDP SMNHKAYR
DAFKK--TKP-----PKIPF-MPLLLKDITFI-----
-----HEGNK--TFH-----D---NLVNFE-KLHMIADTV--RLIRHCQTDQTGNEL
SPCD-----SPEVRSSVHY-LHIIDNQQTLFELSHR---LEPR
>Rapgef5_[Sorex_araneus]_836703300
---DLALELMNFDWSLFNSIHEQ---ELI-----YFTFS-RQGS--G-E-----HTV--
-----NLSLLLQRCNEVQLWVATEILLCSQLGKRVQLVKKFIKIA-
AHCKA-QRNLNSFFAIVMGLNTASVSRLSQTWEKIPGKFKKLFSELESLTDP SLNHKAYR
```

DAFKK--MKP-----PKIPF-MPLLLKDVTFI-----  
-----HEGNK--TFL-----D---NLVNFE-KLSII-----  
-----  
>Rapgef5\_[Stegastes\_partitus]\_657578353  
---DVAVALTDFDLTIFDSMHEQ---ELV---YFTFN-RHVT--SN-----HTT--  
-----ALELLLQRCNEVQLWVMTEVLLCPTLCKRVQLIKKFIKIA-  
AHCKA-QRNLNCFFAIIMGLNAAVSRLAQTWEKIPGKFKKLFSELETVTDPSLNHKAYR  
DSFKK--MKA-----PKIPF-LPLLLKDITFI-----  
-----HEGNK--TFH-----D---NLVNFE-KLHMIAEMA---RLIRQCQKDPMGNGI  
TQKS-----SSEVRAYVDY-LHIIDNQQTLFELSHR---LEPR  
>Rapgef5\_[Struthio\_camelus\_australis]\_697491700  
---DLALELTNFDWSLFNAIHEQ---ELI---YFTFS-RQGS--A-E-----NTE--  
-----NLSLLLQRCNEVQLWVATEILLCSQLCKRVQLVKKFIKIA-  
AHCKA-QRNLNSFFAIVMGLNTASVSRLSQTWEKIPGKFKKLFTELESITDPSLNHKAYR  
DAFKK--MKS-----PKIPF-MPLLLKDVTFI-----  
-----HEGNK--TFL-----D---NLVNFE-KLHMIADTV---RSLRHCRNNQFGNEV  
PSKE-----HHELKPYVHH-LHVIDNQQALFELSHR---IEPR  
>Rapgef5\_[Sturnus\_vulgaris]\_959041358  
---DLALELTNFDWSLFNAIHEQ---ELI---YFTFS-RQGS--A-E-----NTE--  
-----NLSLLLQRCNEVQLWVATEILLCSQLCKRVQLVKKFIKIA-  
AHCKA-QRNLNSFFAIVMGLNTASVSRLSQTWEKIPGKFKKLFTELESITDPSLNHKAYR  
DAFKK--MKS-----PKIPF-MPLLLKDVTFI-----  
-----HEGNK--TFL-----D---NLVNFE-KLHMIADTV---RSLRHCRNNQFGNEV  
PSKE-----HHELKPYVHH-LHVIDNQQALFELSHR---IEPR  
>Rapgef5\_[Sus\_scrofa]\_927180342  
---DLALELMNFDWSLFNSIHEQ---ELI---YFTFS-RQGS--G-E-----HTV--  
-----NLSLLLQRCNEVQLWVATEILLCSQLGKRVQLVKKFIKIA-  
AHCKA-QRNLNSFFAIVMGLNTASVSRLSQTWEKIPGKFKKLFSELESITDPSLNHKAYR  
DAFKK--MKP-----PKIPF-MPLLLKDVTFI-----  
-----HEGNK--TFL-----D---NLVNFE-KLHMIADTV---RTL RHCRTNQFGGDM  
SPKE-----HQELKSYVHH-LYIIDSQQALFELSHR---IEPR  
>Rapgef5\_[Taeniopygia\_guttata]\_823455916  
---DLALELTNFDWSLFNAIHEQ---ELI---YFTFS-RQGS--A-E-----NTE--  
-----NLSLLLQRCNEVQLWVATEILLCSQLCKRVQLVKKFIKIA-  
AHCKA-QRNLNSFFAIVMGLNTASVSRLSQTWEKIPGKFKKLFAELESITDPSLNHKAYR  
DAFKK--MKS-----PKIPF-MPLLLKDVTFI-----  
-----HEGNK--TFL-----D---NLVNFE-KLHMIADTV---RSLRHCRNNQFGNEV  
PSKE-----HHELKPYVHH-LHVIDNQQALFELSHR---IEPR  
>Rapgef5\_[Takifugu\_rubripes]\_768922189  
---DVAVALTQLDWAIFHSVHEQ---DLV---YFTFS-RHSS--SSSSSSSSRTV--  
-----GLELLLQRCNEVQLWVMTEVLLCPLLCKRVRLIKKFIKIA-  
AHCKA-QKNLNCFFAIIMGLNTAAISRLSQTWEKIPGKFKKLFSELEAITDPSLNHKAYR  
DSFKK--MKA-----PKIPF-LPLLLKDITFI-----  
-----HEGNK--TFH-----D---NLVNFE-KLHMIADAV---RFLRQCQRDHMGNGI  
IQKS-----SSEARAHIDY-LHVIDNQQTLFELSHR---LEPR  
>Rapgef5\_[Trichechus\_manatus\_latirostris]\_471379407  
---DLALELMNFDWSLFNSIHEQ---ELI---YFTFS-RQGS--G-E-----HTV--  
-----NLSLLLQRCNEVQLWVATEILLCSQLGKRVQLVKKFIKIA-  
AHCKA-QKNLNSFFAIVMGLNTASVSRLSQTWEKIPGKFKKLFSELESITDPSLNHKAYR  
DAFKK--MKP-----PKIPF-MPLLLKDVTFI-----  
-----HEGNK--TFL-----D---NLVNFE-KLHMIADTV---RTL RHCRTNQFG-DV  
SPKE-----HQELKSYVNH-LYVIDSQQALFELSHR---IEPR  
>Rapgef5\_[Tyto\_alba]\_701352674  
---DLALELTNFDWSLFNAIHEQ---ELI---YFTFS-RQGN--A-E-----NTE--



```

-----NLSLLLQRCNEVQLWVATEVLLCSQLCKRVQLVKKFIKIA-
AHCKA-QRNLNSFFAIVMGLNTASVSRLSQTWEKIPGKFKKLFTELES LTDPSLNHKAYR
DAFKK--MKS-----PKIPF-MPLLLKDVTFI-----
-----HEGNK--TFL-----D---NLVNFE-KLHMIADTV---RSLRHCRNNQFGNEV
PSKE-----HHELKPYVHH-LHVIDNQQUALFELSHR---IEPR
>Rapgef5_[Ursus_maritimus]_670987468
---DLALELMNFDWSLFNSIHEQ---ELI-----YFTFS-RQGS--G-E-----HTA--
-----NLSLLLQRCNEIQLWVATEILLCAQLGKRVQLVKKFIKIA-
AHCKA-QRNLNSFFAIVMGLNTASVSRLSQTWEKIPGKFKKLFSELES LTDPSLNHKAYR
DAFKK--MKP-----PKIPF-MPLLLKDVTFI-----
-----HEGNK--TFL-----D---NLVNFE-KLHMIADTV---RTL RHCRANQFGGDV
SPKE-----HQELKAYVTH-LYVIDSQQUALFELSHR---IEPR
>Rapgef5_[Vicugna_pacos]_970711077
---DLALELMNFDWSLFNSIHEQ---ELI-----YFTFS-RQGG--G-E-----HTM--
-----NLSFLLQRCNEVQLWVATEILLCSQLGKRVQLVKKFIKIA-
AHCKA-QRNLNSFFAIVMGLNIASVSRLSQTWEKIPGKFKKLFSELES LTDPSLNHKAYR
DAFKK--MKP-----PKIPF-MPLLLKDVTFI-----
-----HEGNK--TFL-----D---NLVNFE-KLHMIADTV---RTL RHCRTNQFGGDM
SPKE-----HQELKSYVNH-LYVIDSQQUALFELSHR---IEPR
>Rapgef5_[Xenopus_tropicalis]_847139992
---DIAFELTSFDWSLFNSIHEQ---ELI-----YFTFS-RQ GK--G-E-----NTL--
-----NLSLLLQRCNEVQLWVATEILLCNQPGKRVQLLKKFIKIA-
AHCKA-QRNLNSFFAIIMGLNTASVSRLSQTWEKIPGKFKKLFSELES LTDPSLNHKAYR
DAFKK--MKP-----PKIPF-MPLLLKDVTFI-----
-----HEGNK--TFL-----D---NLVNFE-KLHMIADAV---RSVRYCRNNQFGNDL
PQKE-----RQEAKFYSNH-LHVIDNQQTFLFELSHR---IEPR
>Rapgef5_[Zonotrichia_albicollis]_929433197
---DLALELTNFDWSLFNAIHEQ---ELI-----YFTFS-RQGS--A-E-----NTE--
-----NLSLLLQRCNEVQLWVATEILLCSQLCKRVQLVKKFIKIA-
AHCKA-QRNLNSFFAIVMGLNTASVSRLSQTWEKIPGKFKKLFTELES LTDPSLNHKAYR
DAFKK--MKS-----PKIPF-MPLLLKDVTFI-----
-----HEGNK--TFL-----D---NLVNFE-KLHMIADTV---RSLRHCRNNQFGNEV
PSKE-----HHELKPYVHH-LHVIDNQQUALFELSHR---IEPR
>Rapgef6_[Acanthisitta_chloris]_678007447
STIEVATQLSMRDFELFRNIEPT---EYI-----DDL YK-L-DS---K-TGN-A---
-----HLKQFEDVINQETFWVAMEILAEPNQLKRMKIIKHFIKIA-
LHCRE-CKNFNSMFAVISGLNLAPVARLRGTWEKLPSKYEKHLRDLQDLFDPSRNMAYR
NILSSQSMQP-----PIIPL-FPVVKKDITFL-----
-----HEGND--SKV-----D---GLVNFE-KLRMIAKEI---RQVVRMTSANMDP--
-----
>Rapgef6_[Acinonyx_jubatus]_961725173
STIEVATQLSMRDFDLFRNIEPT---EYI-----DDL FK-L-DS---K-TGN-T---
-----HLKEFEDIVNQETFWVASEILTEPNQLKRMKIIKHFIKIA-
LHCRE-CKNFNSMFAIISGLNLASVARLRGTWEKLPSKYEKHLQDLQDLFDPSRNMAYR
NILSSQSMQP-----PIIPL-FPVVKKDMTFL-----
-----HEGND--SKV-----D---GLVNFE-KLRMIAKEI---RQVVRMTSANMDP--
-----
>Rapgef6_[Acromyrmex_echinatior]_746838642
---EVAIQTLTLDQFSIFRQIEST---EYV-----DDLFE-L-KS---R-YGV-PM---
-----LSQFAELVNREMFVVTEVCSEHNLVRRSKIIKQFIKIA-
RQCKE-CKNFNSMFAIVSGLGHGSVSRLRASWEKLPTKYQRLFSDLQELMDPSRNMSKYR
QLVASEQTQP-----PIIPF-YPVVKKDLTFI-----
-----HLGND--SRV-----E---SLVNFE-KLRMIAKEV---RTL TNMCSSPYD---
-----

```

>Rapgef6\_[Ailuropoda\_melanoleuca]\_752428017  
STIEVATQLSMRDFDLFRNIEPT----EYI----DDLFK-L-DS----K-TGN-T----  
-----HLKEFEDIVNQETFWVASEILTESNQLKRMKIIKHFIKIA-  
LHCRE-CKNFNSMFAIISGLNLASVARLRGTWEKLPSKYEKHLQDLQDLFDPSRNMAKYR  
NILSSQSMQP-----PIIPL-FPVVKKDMTFL-----  
-----HEGND--SKV-----D---GLVNFE-KLRMIAKEI---RQVVRMTSANMDP--  
-----  
>Rapgef6\_[Alligator\_mississippiensis]\_950961550  
STIEVATQLSMRDFELFRNIEPT----EYI----DDLFK-L-DS----K-TGN-A----  
-----HLKQFEDVINQETFWVATEILLEPNQLKRMKIIKHFIKIA-  
LHCRE-CKNFNSMFAVISGLNLASVARLRGTWEKLPSKYEKHFRDLQDLFDPSRNMAKYR  
NILSSQSMQP-----PIIPL-FPVVKKDITFL-----  
-----HEGND--SKV-----D---GLVNFE-KLRMIAKEI---RQVIRMTSANMDP--  
-----  
>Rapgef6\_[Amphimedon\_queenslandica]\_761908046  
-AMQVAEELTRRDSSVFSSIFPS----EFI----SDLWK-SPDK----A-----ARR--  
-----HLIEFEEIPNDEMYWVITTIVSEPSATNRSKIIKHFIKIA-  
KCKKT-LKNYNTMFHLLSGLNHGLVQRLRSSWEKVPTRYKKTMEDLGSMNPFHNMVVKYR  
ELQRQ--TQP-----PLIPF-FPIIKKDLTFL-----  
-----FDGND--TIV-----S---GLINFE-KLRMLSRQI---RIV-----  
-----  
>Rapgef6\_[Anolis\_carolinensis]\_637269194  
STIEVATQLSMRDFELFRNIEPT----EYI----DDLFK-L-ES----K-TGN-A----  
-----NLKQFEDVINQETFWVATEILSESNQLKRMKIVKHFIKIA-  
LHCRE-CKNFNSMFAVISGLNLAPVARLRSTWERLPNKYEKHLRDLQDLFDPSRNMAKYR  
NILSSQSMQP-----PIIPL-FPVVKKDITFL-----  
-----HEGND--SKV-----D---GLVNFE-KLRMIAKEI---RQVIRMTSANMDP--  
-----  
>Rapgef6\_[Anser\_cygnoides\_domesticus]\_902883087  
STIEVATQLSMRDFELFRNIEPT----EYI----DDLK-L-DS----K-TGN-A----  
-----HLKQFEDVINQETFWVAMEILAEPNQLKRMKIIKHFIKIA-  
LHCRE-CKNFNSMFAVISGLNLAPVARLRGTWEKLPSKYEKHLRDLQDLFDPSRNMAKYR  
NILSSQSMQP-----PIIPL-LHPFYRNCVFN-----  
-----YAGND--SKV-----D---GLVNFE-KLRMIAKEI---RQVVRMTSANMDP--  
-----  
>Rapgef6\_[Apis\_cerana]\_1035602523  
---EVAIQLTLQDFSIFRQIEST----EYV----DDLFE-L-KS----R-YGV-PM---  
-----LRQFAELVNREMFVVTEVCSEHNLVRRSKIIKQFIKIA-  
RQCKE-CKNFNSMFAIVSGLGHGAVSRLRASWEKLPSKYQRLFSDLQELMDPSRNMSKYR  
QLVASEQTQP-----PIIPF-YPVVKKDLTFI-----  
-----HLGND--SRV-----E---GLVNFE-KLRMIAKEV---RTLTMCSPPYD---  
-----  
>Rapgef6\_[Apis\_dorsata]\_572301839  
---EVAIQLTLQDFSIFRQIEST----EYV----DDLFE-L-KS----R-YGV-PM---  
-----LRQFAELVNREMFVVTEVCSEHNLVRRSKIIKQFIKIA-  
RQCKE-CKNFNSMFAIVSGLGHGAVSRLRASWEKLPSKYQRLFSDLQELMDPSRNMSKYR  
QLVASEQTQP-----PIIPF-YPVVKKDLTFI-----  
-----HLGND--SRV-----E---GLVNFE-KLRMIAKEV---RTLTMCSPPYD---  
-----  
>Rapgef6\_[Apis\_florea]\_820851405  
---EVAIQLTLQDFSIFRQIEST----EYV----DDLFE-L-KS----R-YGV-PM---  
-----LRQFAELVNREMFVVTEVCSEHNLVRRSKIIKQFIKIA-  
RQCKE-CKNFNSMFAIVSGLGHGAVSRLRASWEKLPSKYQRLFSDLQELMDPSRNMSKYR  
QLVASEQTQP-----PIIPF-YPVVKKDLTFI-----

-----HLGND--SRV-----E---GLVNFE-KLRMIAKEV---RTLTMCCSSPYD---  
-----  
>Rapgef6\_[Aptenodytes\_forsteri]\_686614740  
STIEVATQLSMRDFELFRNIEPT----EYI-----DDLKY-L-DS----K-TGN-A----  
-----HLKQFEDVINQETFWVAMEILAEPNQLKRMKIIKHFIKIA-  
LHCRE-CKNFNSMFAVISGLNLAPVARLRGTWEKLPSKYEKHLRDLQDLFDPSRNMAKYR  
NILSSQSMQP-----PIIPL-FPVVKKDITFL-----  
-----HEGND--SKV-----D---GLVNFE-KLRMIAKEI---RQVVRMTSANMDP---  
-----  
>Rapgef6\_[Apteryx\_australis\_mantelli]\_926505088  
STIEVATQLSMRDFELFRNIEPT----EYI-----DDLKY-L-DS----K-TGN-A----  
-----RLKQFEDVINQETFWVAMEILAEPNQLKRMKIIKHFIKIA-  
LHCRE-CKNFNSMFAVISGLNLAPVARLRGTWEKLPSKYEKHLRDLQDLFDPSRNMAKYR  
NILSSQSMQP-----PIIPL-FPVVKKDITFL-----  
-----HEGND--SKV-----D---GLVNFE-KLRMIAKEI---RQVVRMTSANMDP---  
-----  
>Rapgef6\_[Aquila\_chrysaetos\_canadensis]\_768345498  
STIEVATQLSMRDFELFRNIEPT----EYI-----DDLKY-L-DS----K-TGN-A----  
-----HLKQFEDVINQETFWVAMEILAEPNQLKRMKIIKHFIKIA-  
LHCRE-CKNFNSMFAVISGLNLAPVARLRGTWEKLPSKYEKHLRDLQDLFDPSRNMAKYR  
NILSSQSMQP-----PIIPL-FPVVKKDITFL-----  
-----HEGND--SKV-----D---GLVNFE-KLRMIAKEI---RQVVRMTSANMDP---  
-----  
>Rapgef6\_[Athalia\_rosae]\_817056269  
---EVAIQLTLQDFSIFRQIEST----EYV-----DDLFK-L-KS----R-YGV-PM---  
-----LSHFAELVNREMFVVTEVCSEHNLVRRSKIIKQFLKIA-  
RQCKE-CKNFNSMFAIVSGLGHGAVCRLRGSWEKLPSKYQRLFTDLEKLMGPSRNMCQYR  
QLVASEQTQP-----PIIPF-YPVVRKDLTFI-----  
-----HLGND--SRV-----E---GLVNFE-KLRMIAKEV---RTLTKMCSSPYD---  
-----  
>Rapgef6\_[Balaenoptera\_acutorostrata\_scammoni]\_594681842  
STIEVATQLSMRDFDLFRNIEPT----EYI-----DDLFK-L-DS----K-TGN-T----  
-----HLKEFEDIVNQETFWVASEILTESNQLKRMKIIKHFIKIA-  
LHCRE-CKNFNSMFAIISGLNLASVARLRGTWEKLPSKYEKHLQDLQDLFDPSRNMAKYR  
NILSSQSMQP-----PIIPL-FPVVKKDMTFL-----  
-----HEGND--SKV-----D---GLVNFE-KLRMIAKEI---RQVVRMTSANMDP---  
-----  
>Rapgef6\_[Bison\_bison\_bison]\_742173397  
STIEVATQLSMRDFDLFRNIEPT----EYI-----DDLFK-L-ES----K-TGN-T----  
-----HLKEFEDIVNQETFWVASEILTESNQLKRMKIIKHFIKIA-  
LHCRE-CKNFNSMFAIISGLNLASVARLRGTWEKLPSKYEKHFQDLQDLFDPSRNMAKYR  
NILSSQSMQP-----PIIPL-FPVVKKDMTFL-----  
-----HEGND--SKV-----D---GLVNFE-KLRMIAKEI---RQVVRMTSANMDP---  
-----  
>Rapgef6\_[Bombus\_terrestris]\_808120520  
---EVAIQLTLQDFSIFRQIEST----EYV-----DDLFE-L-KS----R-YGV-PM---  
-----LRQFAELVNREMFVVTEVCSEHNLVRRSKIIKQFIKIA-  
RQCKE-CKNFNSMFAIVSGLGHGAVSRLRASWEKLPSKYQRLFSDLQELMDPSRNMSKYR  
QLVASEQTQP-----PIIPF-YPVVKKDLTFI-----  
-----HLGND--SRV-----E---GLVNFE-KLRMIAKEV---RTLTMCCSSPYD---  
-----  
>Rapgef6\_[Bos\_mutus]\_440912203  
STIEVATQLSMRDFDLFRNIEPT----EYI-----DDLFK-L-ES----K-TGN-T----  
-----HLKEFEDIVNQETFWVASEILTESNQLKRMKIIKHFIKIA-

LHCRE-CKNFNSMFAIISGLNLASVARLRGTWEKLPSKYEKHFQDLQDLFDPSRNMAKYR  
 NILSSQSMQP-----PIIPLFFPVVKKDMTFL-----  
 -----HEGND--SKV-----D---GLVNFE-KLRMIAKEI---RQVVRMTSANMDP--  
 -----  
 >Rapgef6\_[Bos\_taurus]\_528955952  
 STIEVATQLSMRDFDLFRNIEPT----EYI-----DDLFK-L-ES----K-TGN-T----  
 -----HLKEFEDIVNQETFWVASEILTESNQLKRMKIIKHFIKIA-  
 LHCRE-CKNFNSMFAIISGLNLASVARLRGTWEKLPSKYDKHFQDLQDLFDPSRNMAKYR  
 NILSSQSMQP-----PIIPL-FPVVKKDMTFL-----  
 -----HEGND--SKV-----D---GLVNFE-KLRMIAKEI---RQVVRMTSANMDP--  
 -----  
 >Rapgef6\_[Buceros\_rhinoceros\_silvestris]\_704183445  
 STIEVATQLSMRDFELFRNIEPT----EYI-----DDLYK-L-DS----K-TGN-A----  
 -----HLKQFEDVINQETFWVAMEILAEPNQLKRMKIIKHFIKIA-  
 LHCRE-CKNFNSMFAVISGLNLAPVARLRGTWEKLPSKYEKHLRDLQDLFDPSRNMAKYR  
 NILSSQSMQP-----PIIPL-FPVVKKDITFL-----  
 -----HEGND--SKV-----D---GLVNFE-KLRMIAKEI---RQVVRMTSANMDP--  
 -----  
 >Rapgef6\_[Calidris\_pugnax]\_960977010  
 STIEVATQLSMRDFELFRNIEPT----EYI-----DDLYK-L-DS----K-TGN-A----  
 -----HLKQFEDVINQETFWVAMEILAEPNQLKRMKIIKHFIKIA-  
 LHCRE-CKNFNSMFAVISGLNLAPVARLRGTWEKLPSKYEKHLRDLQDLFDPSRNMAKYR  
 NILSSQSMQP-----PIIPL-FPVVKKDITFL-----  
 -----HEGND--SKV-----D---GLVNFE-KLRMIAKEI---RQVVRMTSANMDP--  
 -----  
 >Rapgef6\_[Callorhinchus\_milii]\_632966534  
 STIEVATQLSMRDFELFRNIEPT----EYI-----DDLFK-R-ES----K-SGN-A----  
 -----HLKQFEDIINQETFWVATEILKEVIQLKRMKIIKHFKVVA-  
 LHCRE-CKNFNSMFAIISGLNLAPVARLRGTWEKLPNKYEKLLRDLQDLFDPSRNMAKYR  
 NVLSSQSLQP-----PIIPL-FPVVKKDLTFL-----  
 -----HEGND--SKV-----E---GLANFE-KLRMIAKEI---RHVVRMTSVNMDP--  
 -----  
 >Rapgef6\_[Calypste\_anna]\_663267201  
 STIEVATQLSMRDFELFRNIEPT----EYI-----DDLYK-L-DS----K-TGN-A----  
 -----HLKQFEDVINQETFWVAMEILAEPNQLKRMKIIKHFIKIA-  
 LHCRE-CKNFNSMFAVISGLNLAPVARLRGTWEKLPSKYEKHLRDLQDLFDPSRNMAKYR  
 NILSSQSMQP-----PIIPL-FPVVKKDITFL-----  
 -----HEGND--SKV-----D---GLVNFE-KLRMIAKEI---RQVIRMTSANMDP--  
 -----  
 >Rapgef6\_[Camponotus\_floridanus]\_752870378  
 ---EVAIQLTLQDFSIFRQIEST----EYV-----DDLFE-L-KS----R-YGV-PM---  
 -----LSQFAELVNREMFVVTEVCSEHNLVRRSKIIKQFIKIA-  
 RQCKE-CKNFNSMFAIVSGLGHGAVSRLRASWEKLPSKYQRLFSDLQELMDPSRNMSKYR  
 QLVASEQTQP-----PIIPF-YPVVKKDLTFI-----  
 -----HLGND--SRV-----E---GLVNFE-KLRMIAKEV---RTLTMCCSSPYD---  
 -----  
 >Rapgef6\_[Capra\_hircus]\_548473189  
 STIEVATQLSMRDFDLFRNIEPT----EYI-----DDLFK-L-ES----K-TGN-T----  
 -----HLKEFEDIVNQETFWVASEILTESNQLKRMKIIKHFIKIA-  
 LHCRE-CKNFNSMFAIISGLNLASVARLRGTWEKLPSKYEKHFQDLQDLFDPSRNMAKYR  
 NILSSQSMQP-----PIIPL-FPVVKKDMTFL-----  
 -----HEGND--SKV-----D---GLVNFE-KLRMIAKEI---RQVVRMTSANMDP--  
 -----  
 >Rapgef6\_[Caprimulgus\_carolinensis]\_704293339

STIEVATQLSMRDFELFRNIEPT----EYI-----DDLYK-L-DS----K-TGN-A----  
-----HLKQFEDVINQETFWVAMEILAEPNQLKRMKIIKHFIKIA-  
LHCRE-CKNFNSMFAVISGLNLAPVARLRGTWEKLPSKYEKHLRDLQDLFDPSRNMAKYR  
NILSSQSMQP-----PIIPL-FPVVKKDITFL-----  
-----HEGND--SKV-----D---GLVNFE-KLRMIAKEI---RQVVRMTSANMDP--  
-----

>Rapgef6\_[Cariama\_cristata]\_677240024

STIEVATQLSMRDFELFRNIEPT----EYI-----DDLYK-L-DS----K-TGN-A----  
-----HLKQFEDVINQETFWVAMEILAEPNQLKRMKIIKHFIKIA-  
LHCRE-CKNFNSMFAVISGLNLAPVARLRGTWEKLPSKYEKHLRDLQDLFDPSRNMAKYR  
NILSSQSMQP-----PIIPL-FPVVKKDITFL-----  
-----HEGND--SKV-----D---GLVNFE-KLRMIAKEI---RQVVRMTSANMDP--  
-----

>Rapgef6\_[Carlito\_syrichtha]\_640806933

STIEVATQLSMRDFDLFRNIEPT----EYI-----DDLFK-I-DS----K-TGN-T----  
-----HLKEFADVNVNQETFWVASEILTEPNQLKRMKIIKHFIKIA-  
LHCRE-CKNFNSMFAIISGLNLAPVARLRGTWEKLPSKYEKHLQDLQDLFDPSRNMAKYR  
NILSSQSMQP-----PIIPL-FPVVKKDMTFL-----  
-----HEGND--SKV-----D---GLVNFE-KLRMISKEI---RQVVRMTSANMDP--  
-----

>Rapgef6\_[Cebus\_capucinus\_imitator]\_1044364608

STIEVATQLSMRDFDLFRNIEPT----EYI-----DDLFK-L-NS----K-TGN-S----  
-----HLKRFEDIVNQETFWVASEILTEANQLKRMKIIKHFIKIA-  
LHCRE-CKNFNSMFAIISGLNLASVARLRGTWEKLPSKYEKHLQDLQDIFDPSRNMAKYR  
NILSSQSMQP-----PIIPL-FPVVKKDMTFL-----  
-----HEGND--SKV-----D---GLVNFE-KLRMISKEI---RQVVRMTSANMDP--  
-----

>Rapgef6\_[Cephus\_cinctus]\_1000734957

---EVAIQLTLQDFSIFRQIEST----EYV-----DDLFE-L-KS----R-YGV-PM---  
-----LSQFAELVNREMFVVTEVCSEHNLVRRSKIIKQFIKVA-  
RQCKE-CKNFNSMFAIVSGLGHGAVSRLRASWEKLPSKYQRLFSDLQELMDPSRNMSKYR  
QLVASEQTQP-----PIIPF-YPVVKKDLTFI-----  
-----HLGND--SRV-----E---GLVNFE-KLRMIAKEV---RTLTMCSSPYD---  
-----

>Rapgef6\_[Ceratotherium\_simum\_simum]\_955486624

STIEVATQLSMRDFDLFRNIEPT----EYI-----DDLFK-L-DS----K-TGN-T----  
-----HLKEFEDVVNQETFWVASEILTESNQLKRMKLIKHFIIKIA-  
LHCRE-CKNFNSMFAIISGLNLSSVARLRGTWEKLPSKYEKHLQDLQDLFDPSRNMAKYR  
NILSSQSMQP-----PIIPL-YPVVKKDMTFL-----  
-----HEGND--SKV-----D---GLVNFE-KLRMIAKEI---RQVVRMTSANMDP--  
-----

>Rapgef6\_[Cercopithecus\_atys]\_795413614

STIEVATQLSMRDFDLFRNIEPT----EYI-----DDLFK-L-NS----K-AGN-T----  
-----HLKRFEDIVNQETFWVASEILTEANQLKRMKIIKHFIKIA-  
LHCRE-CKNFNSMFAIISGLNLASVARLRGTWEKLPSKYEKHLQDLQDIFDPSRNMAKYR  
NILSSQSMQP-----PIIPL-FPVVKKDMTFL-----  
-----HEGND--SKV-----D---GLVNFE-KLRMISKEI---RQVVRMTSANMDP--  
-----

>Rapgef6\_[Chaetura\_pelagica]\_701407210

STIEVATQLSMRDFELFRNIEPT----EYI-----DDLYK-L-DS----K-TGN-A----  
-----HLKQFEDVINQETFWVAMEILAEPNQLKRMKIIKHFIKIA-  
LHCRE-CKNFNSMFAVISGLNLAPVARLRGTWEKLPSKYEKHLRDLQDLFDPSRNMAKYR  
NILSSQSMQP-----PIIPL-FPVVKKDITFL-----  
-----HEGND--SKV-----D---GLVNFE-KLRMIAKEI---RQVIRMTSANMDP--  
-----

```

-----
>Rapgef6_[Chinchilla_lanigera]_533121507
STIELAAQLSMRDFDLFRNIEPT----EYI-----DDIFK-L-DS----K-TGN-T----
-----HLKEFEDIVNQETFWVASEILTESNQLKRMKIIKHFIKIA-
LHCRE-CKNFNSMFAIISGLNLAPVARLRGTWEKLPSKYEKHLQDLQDLFDPSRNMAKYR
NILSSQSMQP-----PIIPL-FPVVKKDMTFL-----
-----HEGND--SKV-----D---GLVNFE-KLRMISKEI---RQVVRMTSANMDP--
-----

>Rapgef6_[Chlamydotis_macqueenii]_705691314
STIEVATQLSMRDFELFRNIEPT----EYI-----DDLYK-L-DS----K-TGN-A----
-----HLKQFEDVINQETFWVAMEILAEPNQLKRMKIIKHFIKIA-
LHCRE-CKNFNSMFAVISGLNLAPVARLRGTWEKLPSKYEKHLRDLQDLFDPSRNMAKYR
NILSSQSMQP-----PIIPL-FPVVKKDITFL-----
-----HEGND--SKV-----D---GLVNFE-KLRMIAKEI---RQVVRMTSANMDP--
-----

>Rapgef6_[Chrysemys_picta_bellii]_530612721
STIEVATQLSMRDFELFRNIEPT----EYI-----DDLYK-M-DS----K-TGN-A----
-----HLKQFEDVINQETFWVATEILTEPNQLKRMKIVKHFIKIA-
LHCRE-CKNFNSMFAVISGLNLAPVARLRGTWEKLPSKYEKHLRDLQDLFDPSRNMAKYR
NILSSQSMQP-----PIIPL-FPVVKKDITFL-----
-----HEGND--SKV-----D---GLVNFE-KLRMIAKEI---RQVVRMTSANMDP--
-----

>Rapgef6_[Chrysochloris_asiatica]_586485014
STIEVATQLSMRDFDLFRNIEPT----EYI-----DDLYK-L-DS----K-TGS-T----
-----HLKEFEDIVNQETFWVASEILTESNQLKRMKIIKHFIKIA-
LHCRE-CKNFNSMFAIISGLNLASVARLRGTWEKLPNKYEKHLQDLQDLFDPSRNMAKYR
NILSSQSMQP-----PIIPL-FPVVKKDMTFL-----
-----HEGND--SKV-----D---GLVNFE-KLRMIAKEI---RQVIRMTSANMDP--
-----

>Rapgef6_[Colius_striatus]_706103685
STIEVATQLSMRDFELFRNIEPT----EYI-----DDLYK-L-DS----K-TGN-A----
-----HLKQFEDVINQETFWVAMEILAEPNQLKRMKIIKHFIKIA-
LHCRE-CKNFNSMFAVISGLNLAPVARLRGTWEKLPSKYEKHLRDLQDLFDPSRNMAKYR
NILSSQSMQP-----PIIPL-FPVVKKDITFL-----
-----HEGND--SKV-----D---GLVNFE-KLRMIAKEI---RQVVRMTSANMDP--
-----

>Rapgef6_[Colobus_angolensis_palliatus]_795224891
STIEVATQLSMRDFDLFRNIEPT----EYI-----DDLFK-L-NS----K-TGN-T----
-----HLKRFEDIVNQETFWVASEILTEANQLKRMKIIKHFIKIA-
LHCRE-CKNFNSMFAIISGLNLASVARLRGTWEKLPSKYEKHLQDLQDIFDPSRNMAKYR
NILSSQSMQP-----PIIPL-FPVVKKDMTFL-----
-----HEGND--SKV-----D---GLVNFE-KLRMISKEI---RQVVRMTSANMDP--
-----

>Rapgef6_[Columba_livia]_449267215
STIEVATQLSMRDFELFRNIEPT----EYI-----DDLYK-L-DS----K-TGN-A----
-----HLKQFEDVINQETFWVAMEILAEPNQLKRMKIIKHFIKIA-
LHCRE-CKNFNSMFAVISGLNLAPVARLRGTWEKLPSKYEKHLRDLQDLFDPSRNMAKYR
NILSSQSMQP-----PIIPL-FPVVKKDITFL-----
-----HEGND--SKV-----D---GLVNFE-KLRMIAKEI---RQVVRMTSANMDP--
-----

>Rapgef6_[Condylura_cristata]_507959748
STIEVATQLSMRDFDLFRNIEPT----EYI-----DDLFK-L-DS----K-TGN-T----
-----HLKEFEDIVNQETFWVASEILTESNQLKRMKIIKHFIKIA-
LHCRE-CKNFNSMFAIISGLNLASVARLRGTWEKLPSKYEKHLQDLQDLFDPSRNMAKYR

```

NILSSQSMQP-----PIIPL-FPVVKKDMTFL-----  
-----HEGND--SKV-----D---GLVNFE-KLRMIAKEI---RQVVRMTSANMDP--  
-----  
>Rapgef6\_[Corvus\_cornix\_cornix]\_726993269  
STIEVATQLSMRDFELFRNIEPT----EYI-----DDLYK-L-DS----K-TGN-A----  
-----HLKQFEDVINQETFWVAMEILAEPNQLKRMKIIKHFIKIA-  
LHCRE-CKNFNSMFAVISGLNLAPVARLRGTWEKLPSKYEKHLRDLQDLFDPSRNMAKYR  
NILSSQSMQP-----PIIPL-FPVVKKDITFL-----  
-----HEGND--SKV-----D---GLVNFE-KLRMIAKEI---RQVVRMTSANMDP--  
-----  
>Rapgef6\_[Crassostrea\_gigas]\_762094130  
-TTEVASQLTLDDFKVFASIQPT----EYI-----DKLFN-I-KS----K-YGI-P----  
-----NLEKFVELVNKEMYWVITEVCSEPNVVKRMRIIKQFIKIA-  
KHCKD-CKNFNSMFSILSGLDKVYVSRLRNTWEKLSKKDLKTYDDLKELIDPSKNMSKYR  
SYVGSEHVQP-----PMLPL-FPVAMKDLTFL-----  
-----KDGND--TKV-----D---GLINFE-KFRMIAKEI---R-----  
-----  
>Rapgef6\_[Cynoglossus\_semilaevis]\_1035260107  
STMEVAAQLSMRDFELFRNIEST----EYV-----DDLFK-L-DS----S-VGS---G--  
-----NLKQFEEVINQETFWVATEILKEPNTLKRMTIKHFIKIA-  
LHCRE-CKNFNSMFAIISGLNLAPVARLRSSWEKLPSKYEKLFGLQDVFDPSRNMAKYR  
NILSSQSMQP-----PIIPL-FPVVKKDLTFL-----  
-----HEGND--SSV-----D---GLVNFE-KLRMIAKEI---RHVVRMTSANMDP--  
-----  
>Rapgef6\_[Daphnia\_magna]\_1022775171  
---EVAVQLTLQDFAIFTQIEST----EYV-----DDLQ-L-RS----K-YGT-PH---  
-----LSQFSELVNREMFVVTEICAEHNLRRMRAIKQFIKVA-  
RQCKE-CKNFNSMFNIISGLGHGAVSRLKQTWEKLPGKYQRLFRDMQDLMDPSRNMSKYR  
NLINSEHVQP-----PMIPF-FPVVKKDLTFI-----  
-----HLGND--TRV-----D---GLINFE-KLRMIAKEV---RSLSHMCSAPYD---  
-----  
>Rapgef6\_[Diuraphis\_noxia]\_985398056  
---EVAVQLTLQDFSIFRQIEAT----EYV-----DDLQ-L-DS----R-YGT-PM---  
-----LSKFAELVNTEMFWVTEICSEHNLIRRSKMIKQFIKVA-  
RQCKE-CKNFNSMFAIISGLGHGAVSRLRQSWEKLPTKYQRLFSDLQDLMDPSRNMSKYR  
QLVSNEQSQP-----PIIPF-YPVVKKDLTFI-----  
-----HLGND--THV-----E---SLINFE-KLRMIAKEV---RNLTNMCSSPYD---  
-----  
>Rapgef6\_[Echinococcus\_multilocularis]\_674571093  
SPEEVAIQLTLDDFSIFRSIEAA----EFV-----DKVFG-L-TPP-TSSALDGC-SNSSN  
NGNIDNDGGGGGGFATGCANLDAFADVVNKEAYWVPSELCAETSLPKRVDMLKRFIKIA-  
KLCDR-LRNFTNMFICILVGLHMSPVVERLRQWTWERLPNKYVKMSRDLALVLDPSRNFAHYR  
NLLTSPQPSPQTGAQCLPLVPY-LPLVLKDLTFI-----  
-----HLGNP--SRSPATSASSSACPQLINFA-KLRMFAKEI---RSLR-----  
-----  
>Rapgef6\_[Echinops\_telfairi]\_507622381  
STIEVATQLSMRDFDLFRNIEPT----EYV-----DDLQ-L-DS----K-TGN-T----  
-----HLKAFEDIVNQETFWVASEILTESNQLKRMKIIKHFIKIA-  
LHCRE-CKNFNSMFAIISGLNLAPVARLRGTWEKLPNKYEKHLQDLQDIFDPSRNMAKYR  
NILSSQSMQP-----PIIPL-FPVVKKDMTFL-----  
-----HEGND--SKV-----D---GLVNFE-KLRMIAKEI---RQVVRMTSANMDP--  
-----  
>Rapgef6\_[Elephantulus\_edwardii]\_585707699  
STIELAAQLSMRDFDLFRNIEPT----EYI-----DDLQ-L-DS----K-TGN-T----

```

-----HLKEFEDIVNQETFWVASEILTEANQLKRMKIIKHFIKIA-
LHCRE-CKNFNSMFAIISGLNLASVARLRGTWEKLPNKYEKHLQDLQDLFDPSRNMAKYR
NILSSQSMQP-----PIIPL-FPVVKKDMTFL-----
-----HEGND--SKV-----D---GLVNFE-KLRMIAKEI---RQVVRMTSANMDP--
-----
>Rapgef6_[Equus_asinus]_958795657
STIEVATQLSMRDFDLFRNIEPT----EYI-----DDLFK-L-DS----K-TGN-T----
-----HLKEFEDIVNQETFWVATEILTESNQLKRMKLIKHFIKIA-
LHCRE-CKNFNSMFAIISGLNLSSVARLRGTWEKLP SKYEKHLQDLQDLFDPSRNMAKYR
NVLSSQSMQP-----PIIPL-YPVVKKDMTFL-----
-----HEGND--SKV-----D---GLVNFE-KLRMIAKEI---RQVVRMTSANMDP--
-----
>Rapgef6_[Equus_caballus]_545185041
STIEVATQLSMRDFDLFRNIEPT----EYI-----DDLFK-L-DS----K-TGN-T----
-----HLKEFEDIVNQETFWVATEILTESNQLKRMKLIKHFIKIA-
LHCRE-CKNFNSMFAVISGLNLSSVARLRGTWEKLP SKYEKHLQDLQDLFDPSRNMAKYR
NVLSSQSMQP-----PIIPL-YPVVKKDMTFL-----
-----HEGND--SKV-----D---GLVNFE-KLRMIAKEI---RQVVRMTSANMDP--
-----
>Rapgef6_[Erinaceus_europaeus]_617645429
STIEVATQLSMRDFDLFRNIEPT----EYI-----DDLFK-L-DS----K-TGN-T----
-----HLKEFEDIINQETFWVASEILSESNQLKRMKIIKHFIKIA-
LHCRE-CKNFNSMFAIISGLNLASVARLRGTWEKLP SKYEKHLQDLQDLFDPSRNMAKYR
NILSSQSMQP-----PIIPL-FPVVKKDMTFL-----
-----HEGND--SKV-----D---GLVNFE-KLRMIAKEI---RQVIRMTSANMDP--
-----
>Rapgef6_[Esox_lucius]_884954377
STVEVAAQLSMRDFELFRNIEST----EYV-----DDLFK-LLDS----S-GGA-QQT--
-----RLKQFEEVINQETFWVATEILREANAVKRMKTIKHFIKIA-
LHCRE-CKNFNSMFAIISGLNLAPVARLRSSWEKLP GKYDKLFRDLQDIFDPSRNMAKYR
NVLSSQSMQP-----PIIPL-FPVVKKDLTFL-----
-----HEGND--SSV-----D---GLVNFE-KLRMIAKEI---RHVVRMTSANMDP--
-----
>Rapgef6_[Falco_peregrinus]_909808310
STIEVATQLSMRDFELFRNIEPT----EYI-----DDL YK-L-DS----K-TGN-A----
-----HLKQFEDVINQETFWVAMEILAEPNQLKRMKIIKHFIKIA-
LHCRE-CKNFNSMFAVISGLNLAPVARLRGTWEKLP SKYEKHLRDLQDLFDPSRNMAKYR
NILSSQSMQP-----PIIPL-FPVVKKDITFL-----
-----HEGND--SKV-----D---GLVNFE-KLRMIAKEI---RQVVRMTSANMDP--
-----
>Rapgef6_[Felis_catus]_755689987
STIEVATQLSMRDFDLFRNIEPT----EYI-----DDLFK-L-DS----K-TGN-T----
-----HLKEFEDIVNQETFWVASEILTEPNQLKRMKIIKHFIKIA-
LHCRE-CKNFNSMFAIISGLNLASVARLRGTWEKLP SKYEKHLQDLQDLFDPSRNMAKYR
NILSSQSMQP-----PIIPL-FPVVKKDMTFL-----
-----HEGND--SKV-----D---GLVNFE-KLRMIAKEI---RQVVRMTSANMDP--
-----
>Rapgef6_[Ficedula_albicollis]_1020955556
STIEVATQLSMRDFELFRNIEPT----EYI-----DDL YK-L-DS----K-TGN-A----
-----HLKQFEDVINQETFWVAMEILAEPNQLKRMKIIKHFIKIA-
LHCRE-CKNFNSMFAVISGLNLAPVARLRGTWEKLP SKYEKHLRDLQDLFDPSRNMAKYR
NILSSQSMQP-----PIIPL-FPVVKKDITFL-----
-----HEGND--SKV-----D---GLVNFE-KLRMIAKEI---RQVVRMTSANMDP--
-----

```



```

>Rapgef6_[Fundulus_heteroclitus]_831570941
STMEVAAQLSMRDFELFRNIEST----EYV-----EDLFK-L-DS----S-AGC---T--
-----NLKQFEEVINQETFWVATEILKEPNTMKRMKTIKHFVKIA-
LHCRE-CKNFNSMFAIISGLNLAPVNRRLSSWEKLPSKYEKLFDLQDVFDPSRNMAKYR
NVLSSQSMQP-----PIIPL-FPVIKKDLTFL-----
-----HEGND--SSV-----D---GLVNFE-KLRMIAKEI---RHVVRMTSANMDP--
-----

>Rapgef6_[Gallus_gallus]_971418567
STIEVATQLSMRDFELFRNIEPT----EYI-----DDLYK-L-DS----K-TGN-A----
-----HLKQFEDVINQETFWVAMEILAEPNQLKRMKIIKHFIKIA-
LHCRE-CKNFNSMFAVISGLNLAPVARLRGTWEKLPGKYEKHLRDLQDLFDPSRNMAKYR
NILSSQSMQP-----PIIPL-FPVVKKDITFL-----
-----HEGND--SKV-----D---GLVNFE-KLRMIAKEI---RQVVRMTSANMDP--
-----

>Rapgef6_[Gavia_stellata]_698442235
STIEVATQLSMRDFELFRNIEPT----EYI-----DDLYK-L-DS----K-TGN-A----
-----HLKQFEDVINQETFWVAMEILAEPNQLKRMKIIKHFIKIA-
LHCRE-CKNFNSMFAVISGLNLAPVARLRGTWEKLPSKYEKHLRDLQDLFDPSRNMAKYR
NILSSQSMQP-----PIIPL-FPVVKKDITFL-----
-----HEGND--SKV-----D---GLVNFE-KLRMIAKEI---RQVVRMTSANMDP--
-----

>Rapgef6_[Haliaeetus_leucocephalus]_729760461
STIEVATQLSMRDFELFRNIEPT----EYI-----DDLYK-L-DS----K-TGN-A----
-----HLKQFEDVINQETFWVAMEILAEPNQLKRMKIIKHFIKIA-
LHCRE-CKNFNSMFAVISGLNLAPVARLRGTWEKLPSKYEKHLRDLQDLFDPSRNMAKYR
NILSSQSMQP-----PIIPL-FPVVKKDITFL-----
-----HEGND--SKV-----D---GLVNFE-KLRMIAKEI---RQVVRMTSANMDP--
-----

>Rapgef6_[Halyomorpha_halys]_939647710
---EVAVQLTLQDFSIFRQIEST----EYV-----DDLFG-I-KS----R-YGT-PM---
-----LTQFAELVNREMFVVTEVCSEHNLVRRSKI IKQFIKVA-
RQCKE-CKNFNSMFAIISGLGHGAVSRLRTTWDKLPSKYQRLFQDLQQIMDPSRNMSKYR
QLVNS--GTP-----PIIPF-YPVVKKDLTFI-----
-----HLGND--TKV-----E---GLINFE-KLRMIAKEV---RTLTMCSSPYD---
-----

>Rapgef6_[Heterocephalus_glaber]_512948458
STIELATQLSMRDFDLFRNIEPT----EYI-----DDIFK-L-DS----K-TGN-T----
-----HLKEFEDIVNQETFWVASEILTESNPLKRMKVIKHFIKIA-
LHCRE-CKNFNSMFAIISGLNLAPVARLRGTWEKLPNKYEKHLQDLQDLFDPSRNMAKYR
NILSSQSMQP-----PIIPL-FPVVKKDMTFL-----
-----HEGND--SKV-----D---GLVNFE-KLRMISKEI---RQVVRMTSANMDP--
-----

>Rapgef6_[Hydra_vulgaris]_828198711
---DVAKELTLQDFDLFRNVDSR----EYI-----YNLFE-SNNE----R---K-SK---
-----NLRCVEQTTNTEMFVWVISEICLESNIAKRVKLLKYIYIKVA-
KYCKD-FKNYNSMYAVISGLANTAISRLKHTWEKLPPKHEDMFQDLLDLMDPSRNMSKYR
NMFTGEQCYP-----PIIPW-FPIVKKDMTFL-----
-----HLGND--THV-----D---GLVNFE-KLRMIAREV---RRVCKFCAIGYDP--
-----

>Rapgef6_[Ictalurus_punctatus]_1042302961
STLEVSAQLSMRDFSIFRNIEST----EYV-----DSLFE-L-NS----S-SG-----
-----HLKQFEDLINQETFWVATEILHEANALKRMKTIKHFVKIA-
LQCRE-CKNFNSMFAIISGLNLAPVARLRSTWEKLPSKYEKLFRDLQDIFDPSRNMAKYR
NILNSQSMQI-----PIIPL-FPVVKKDLTFL-----

```

-----HEGND--TNV-----D---GLVNFE-KLRMIAKEV---R-----  
-----  
>Rapgef6\_[Ictidomys\_tridecemlineatus]\_532100447  
STIEMATQLSMRDFDLFRNIEPT----EYI-----DDLFK-L-DS----K-TGN-T----  
-----HLKEFEDIVNQETFWVASEILTESNQLKRMKIIKHFIKIA-  
LHCRE-CKNFNSMFAIISGLNLAPVARLRGTWEKLPSKYEKHLQDLQDLFDPSRNMAKYR  
NILSSQSMQP-----PIIPL-FPVVKKDMTFL-----  
-----HEGND--SKV-----D---GLVNFE-KLRMIAKEI---RQVVRMTSANMDP--  
-----  
>Rapgef6\_[Larimichthys\_crocea]\_808885705  
STMEVAAQLSMRDFELFRNIEST----EYV-----DDLFK-L-ES----S-RGS---G--  
-----NLKQFEEVINQETFWVATEILKEPNALKRMKTIKHFIKIA-  
LHCRE-CKNFNSMFAIISGLNLAPVARLRSSWEKLPSKYEKLFGLQDVFDPSRNMAKYR  
NILSSQSMQP-----PIIPL-FPVVKKDLTFL-----  
-----HEGND--SSV-----D---GLVNFE-KLRMIAKEI---RHVVRMTSANMDP--  
-----  
>Rapgef6\_[Lepisosteus\_oculatus]\_972976864  
STIEVATQLSMRDFELFRNLEPT----EYI-----DDLFK-L-DS----A-ASN-T----  
-----HLKQFEDVINQETFWVATEILKEPNHFKRMKTIKHFIKIS-  
LHCRE-CKNFNSMFAIISGLNLAPVARLRGTWEKLPSKYEKLFDRDLQDIFDPSRNMAKYR  
NLLSSQSMQP-----PIIPL-FPVVKKDLTFL-----  
-----HEGND--SSV-----D---GLVNFE-KLRMVAKEI---RHVVRMTSANMDP--  
-----  
>Rapgef6\_[Leptonychotes\_weddellii]\_585151000  
STIEVATQLSMRDFDLFRNIEPT----EYI-----DDLFK-L-DS----K-TGN-T----  
-----HLKEFEDIVNQETFWVASEILTESNQLKRMKIIKHFIKIA-  
LHCRE-CKNFNSMFAIISGLNLASVARLRGTWEKLPSKYEKHLQDLQDLFDPSRNMAKYR  
NILSSQSMQP-----PIIPL-FPVVKKDMTFL-----  
-----HEGND--SKV-----D---GLVNFE-KLRMIAKEI---RQVVRMTSANMDP--  
-----  
>Rapgef6\_[Limulus\_polyphemus]\_926627213  
---EIIATQLTLEDFSIQCIEPT----EYI-----DDLFD-I-KS----R-YGT-P----  
-----KLSKFGEVLNREMFWVTEVCSEPNHLRRMKIIKQFIKVA-  
RQCKE-CKNFNSMFAISGLDHGAVSRLRSAWEKLPSKYSKMFKDLSDLMDPSRNMCKYR  
TLISSEHTHP-----PMIPF-YPVVKKDLTFI-----  
-----HLGND--TKV-----E---GLVNFE-KLRMVAKEV---RQL-----  
-----  
>Rapgef6\_[Lingula\_anatina]\_919032373  
-SIEIIATQLTLEDFHIFANIEAT----EYI-----DDLFD-L-PS----K-YGT-P----  
-----NILQFQELVNREMFWVTTEVVRETNIIRMKIIKHFIKIA-  
RHCKE-CKNFNSMFAISGLGHGSVQRLRTTWDKLPNKYVKIYEDLQTIMDPSRNMAKYR  
NLINSELVQP-----PLIPL-FPIVKKDLTFI-----  
-----HLGND--SKV-----D---GLVNFE-KLRMIAKEV---RHLCLMASAPYDPNA  
-----  
>Rapgef6\_[Macaca\_mulatta]\_109078488  
STIEVATQLSMRDFDLFRNIEPT----EYI-----DDLFK-L-NS----K-AGN-T----  
-----HLKRFEDIVNQETFWVASEILTEANQLKRMKIIKHFIKIA-  
LHCRE-CKNFNSMFAIISGLNLASVARLRGTWEKLPSKYEKHLQDLQDIFDPSRNMAKYR  
NILSSQSMQP-----PIIPL-FPVVKKDMTFL-----  
-----HEGND--SEV-----D---GLVNFE-KLRMISKEI---RQVVRMTSANMDP--  
-----  
>Rapgef6\_[Macaca\_nemestrina]\_795530958  
STIEVATQLSMRDFDLFRNIEPT----EYI-----DDLFK-L-NS----K-AGN-T----  
-----HLKRFEDIVNQETFWVASEILTEANQLKRMKIIKHFIKIA-

LHCRE-CKNFNSMFAIISGLNLASVARLRGTWEKLPSKYEKHLQDLQDIFDPSRNMAKYR  
 NILSSQSMQP-----PIIPL-FPVVKKDMTFL-----  
 -----HEGND--SEV-----D---GLVNFE-KLRMISKEI---RQVVRMTSANMDP--  
 -----  
 >Rapgef6\_[Mandrillus\_leucophaeus]\_795275466  
 STIEVATQLSMRDFDLFRNIEPT----EYI-----DDLFK-L-NS----K-AGN-T----  
 -----HLKRFEDIVNQETFWVASEILTEANQLKRMKIIKHFIKIA-  
 LHCRE-CKNFNSMFAIISGLNLASVARLRGTWEKLPSKYEKHLQDLQDIFDPSRNMAKYR  
 NILSSQSMQP-----PIIPL-FPVVKKDMTFL-----  
 -----HEGND--SKV-----D---GLVNFE-KLRMISKEI---RQVVRMTSANMDP--  
 -----  
 >Rapgef6\_[Marmota\_marmota\_marmota]\_984113345  
 STIEMATQLSMRDFDLFRNIEPT----EYI-----DDLFK-L-DS----K-TGN-T----  
 -----HLKEFEDIVNQETFWVASEILTESNQVKRMKIIKHFIKIA-  
 LHCRE-CKNFNSMFAIISGLNLAPVARLRGTWEKLPSKYEKHLQDLQDLFDPSRNMAKYR  
 NILSSQSMQP-----PIIPL-FPVVKKDMTFL-----  
 -----HEGND--SKV-----D---GLVNFE-KLRMIAKEI---RQVVRMTSANMDP--  
 -----  
 >Rapgef6\_[Melopsittacus\_undulatus]\_527258131  
 STIEVATQLSMRDFELFRNIEPT----EYI-----DDLK-L-DS----K-TGN-A----  
 -----HLKQFEDVINQETFWVAMEILAEPNQLKRMKIIKHFIKIA-  
 LHCRE-CKNFNSMFAVISGLNLAPVARLRGTWEKLPSKYEKHLRDLQDLFDPSRNMAKYR  
 NILSSQSMQP-----PIIPL-FPVVKKDITFL-----  
 -----HEGND--SKV-----D---GLVNFE-KLRMIAKEI---RQVVRMTSANMDP--  
 -----  
 >Rapgef6\_[Merops\_nubicus]\_675611298  
 STIEVATQLSMRDFELFRNIEPT----EYI-----DDLK-L-DS----K-TGN-A----  
 -----HLKQFEDVINQETFWVAMEILAEPNQLKRMKIIKHFIKIA-  
 LHCRE-CKNFNSMFAVISGLNLAPVARLRGTWEKLPSKYEKHLRDLQDLFDPSRNMAKYR  
 NILSSQSMQP-----PIIPL-FPVVKKDITFL-----  
 -----HEGND--SKV-----D---GLVNFE-KLRMIAKEI---RQVVRMTSANMDP--  
 -----  
 >Rapgef6\_[Microcebus\_murinus]\_829753489  
 STIELATQLSMRDFDLFRNIEPT----EYI-----DDLK-L-DC----Q-TGN-T----  
 -----HLKEFEDIVNQETFWVASEILTESNQVKRMKIIKHFIKIA-  
 LHCRE-CKNFNSMFAIISGLNLAPVARLRGTWEKLPSKYEKHLQDLQDLFDPSRNMAKYR  
 NILSSQSMQP-----PIIPL-FPVVKKDMTFL-----  
 -----HEGND--SKV-----D---GLVNFE-KLRMIAKEI---RQVVRMTSANMDP--  
 -----  
 >Rapgef6\_[Mus\_musculus]\_568972368  
 STIEVATQLSMRDFDLFRNIEPT----EYI-----DDLK-L-DS----K-TGN-T----  
 -----HLKQFEDIVNQETFWVASEILSESNQLKRMKIIKHFIKIA-  
 LHCRE-CKNFNSMFAIISGLNLAPVARLRGTWEKLPSKYEKHLQDLQDLFDPSRNMAKYR  
 NILSSQSMQP-----PIIPL-FPVVKKDMTFL-----  
 -----HEGND--SKV-----D---GLVNFE-KLRMIAKEI---RHIIRMTSANMDP--  
 -----  
 >Rapgef6\_[Myotis\_brandtii]\_521025561  
 STVELATQLSMRDFDLFRNIEPT----EYI-----DDLK-L-DS----K-TGN-T----  
 -----HLKEFEDIVNQETFWVASEVLTESNQVKRMKIIKHFIKIA-  
 LHCRE-CKNFNSMFAIISGLNLASVARLKGRTWEKLPSKYEKHLQDLQDLFDPSRNMAKYR  
 NILSSQSMQP-----PIIPL-FPVVKKDMTFL-----  
 -----HEGND--SKV-----D---GLVNFE-KLRMIAKEI---RQVVRMTSANMDP--  
 -----  
 >Rapgef6\_[Myotis\_davidii]\_432109543

STVELATQLSMRDFDLFRNIEPT----EYI-----DDLFK-L-NS----K-TGN-T----  
-----HLKEFEDIVNQETFWVASEVLTESNQLKRMKIIKHFIKIA-  
LHCRE-CKNFNSMFAIISGLNLASVARLKGTWEKLPSKYEKHLQDLQDLFDPSRNMAKYR  
NILSSQSMQP-----PIIPL-FPVVKKDMTFL-----  
-----HEG-----

>Rapgef6\_[Myotis\_lucifugus]\_558176198

STVELATQLSMRDFDLFRNIEPT----EYI-----DDLFK-L-DS----K-TGN-T----  
-----HLKEFEDIVNQETFWVASEVLTESNQLKRMKIIKHFIKIA-  
LHCRE-CKNFNSMFAIISGLNLASVARLKGTWEKLPSKYEKHLQDLQDLFDPSRNMAKYR  
NILSSQSMQP-----PIIPL-FPVVKKDMTFL-----  
-----HEGND--SKV-----D---GLVNFE-KLRMIAKEI---RQVVRMTSANMDP--

>Rapgef6\_[Nomascus\_leucogenys]\_332221642

STIEVATQLSMRDFDLFRNIEPT----EYI-----DDLFK-L-NS----K-TGN-T----  
-----HLKRFEDIVNQETFWVASEILTEANQLKRMKIIKHFIKIA-  
LHCRE-CKNFNSMFAIISGLNLASVARLRGTWEKLPSKYEKHLQDLQDLFDPSRNMAKYR  
NILSSQSMQP-----PIIPL-FPVVKKDMTFL-----  
-----HEGND--SKV-----D---GLVNFE-KLRMISKEI---RQVVRMTSANMDP--

>Rapgef6\_[Odobenus\_rosmarus\_divergens]\_472377738

STIEVATQLSMRDFDLFRNIEPT----EYI-----DDLFK-L-DS----K-TGN-T----  
-----HLKEFEDIVNQETFWVASEILTESNQLKRMKIIKHFIKIA-  
LHCRE-CKNFNSMFAIISGLNLASVARLRGTWEKLPSKYEKHLQDLQDLFDPSRNMAKYR  
NILSSQSMQP-----PIIPL-FPVVKKDMTFL-----  
-----HEGND--SKV-----D---GLVNFE-KLRMIAKEI---RQVVRMTSANMDP--

>Rapgef6\_[Orcinus\_orca]\_466058795

STIEVATQLSMRDFDLFRNIEPT----EYI-----DDLFK-L-DS----K-TGN-I----  
-----HLKEFEDIVNQETFWVASEILTESNQLKRMKIIKHFIKIA-  
LHCRE-CKNFNSMFAIISGLNLASVARLRGTWEKLPSKYEKHLQDLQDLFDPSRNMAKYR  
NILSSQSMQP-----PIIPL-FPVVKKDMTFL-----  
-----HEGND--SKV-----D---GLVNFE-KLRMIAKEI---RQVVRMTSANMDP--

>Rapgef6\_[Ornithorhynchus\_anatinus]\_620947523

STIEVATQLSMRDFDLFRNIEPT----EYI-----DDLK-L-DS----K-TGN-A----  
-----HLKEFEDIINQETFWVATEILAEPNQLKRMKIVKHFIKIA-  
LHCRE-CKNFNSMFAVISGLNLAPVARLRGTWEKLPSKYEKHFRDLQDLFDPSRNMAKYR  
NILSSQSMQP-----PIIPL-FPVVKKDITFL-----  
-----HEGND--SKV-----D---GLVNFE-KLRMIAKEI---RQVIRMTSANMDP--

>Rapgef6\_[Orussus\_abietinus]\_817220783

---EVAIQLTLQDFSIFRQIEST----EYV-----DDLFE-L-KS----R-YGV-PM---  
-----LSQFAELVNREMFVVTEVCSEHNLVRRSKI IKQFIKIA-  
RQCKE-CKNFNSMFAIVSGLGHGAVSRLRASWEKLPSKYQRLFSDLQELMDPSRNMSKYR  
QLVASEQTQP-----PIIPF-YPVVKKDLTFI-----  
-----HLGND--SRV-----E---NLVNFE-KLRMIAKEI---RTL-----

>Rapgef6\_[Orycteropus\_afer\_afer]\_634856153

STIEVATQLSMRDFDLFRNIEPT----EYI-----DDLFK-L-DS----K-TGN-T----  
-----HLKEFEDIVNQETFWVASEILTESNQLKRMKIIKHFIKIA-  
LHCRE-CKNFNSMFAIISGLNLAPVARLRGTWEKLPNKYEKHLQDLQDLFDPSRNMAKYR  
NILSSQSMQP-----PIIPL-FPLVKKDMTFL-----  
-----HEGND--SKV-----D---GLVNFE-KLRMIAKEI---RQVIRMTSANMDP--

```

-----
>Rapgef6_[Oryzias_latipes]_765140209
STMEVAAQLSMRDFELFRNIEPT----EYV-----DDLFK-L-DS----P-LSR-G----
-----NLKRFEVVMNQETFWVATEILREPNSVKRMRTIKHFIKIA-
LHCKE-CKNFNSMFAIISGLDLPPVARLRSSWEKLPSKYAKLFGDLQDVFDPSRNMAKYR
NMLSSQSMQP-----PIIPL-FPVIKKDLTFF-----
-----HEGND--SSV-----D---GLVNFE-KLRMIAKEI---RHVVRMTSANMDP--
-----

>Rapgef6_[Ovis_aries_musimon]_803320919
STIEVATQLSMRDFDLFRNIEPT----EYI-----DDLFK-L-ES----K-TGN-T----
-----HLKEFEDIINQETFWVASEILTESNQLKRMKIIKHFIKIA-
LHCRE-CKNFNSMFAIISGLNLASVARLRGTWEKLPSKYEKHFQDLQDLFDPSRNMAKYR
NILSSQSMQP-----PIIPL-FPVVKKDMTFL-----
-----HEGND--SKV-----D---GLVNFE-KLRMIAKEI---RQVVRMTSANMDP--
-----

>Rapgef6_[Pan_troglodytes]_114601518
STIEVATQLSMRDFDLFRNIEPT----EYI-----DDLFK-L-NS----K-TGN-T----
-----HLKRFEDIVNQETFWVASEILTEANQLKRMKIIKHFIKIA-
LHCRE-CKNFNSMFAIISGLNLASVARLRGTWEKLPSKYEKHLQDLQDLFDPSRNMAKYR
NILSSQSMQP-----PIIPL-FPVVKKDMTFL-----
-----HEGND--SKV-----D---GLVNFE-KLRMISKEI---RQVVRMTSANMDP--
-----

>Rapgef6_[Panthera_tigris_altaica]_591323552
STIEVATQLSMRDFDLFRNIEPT----EYI-----DDLFK-L-DS----K-TGN-T----
-----HLKEFEDIVNQETFWVASEILTEPNQLKRMKIIKHFIKIA-
LHCRE-CKNFNSMFAIISGLNLASVARLRGTWEKLPSKYEKHLQDLQDLFDPSRNMAKYR
NILSSQSMQP-----PIIPL-FPVVKKDMTFL-----
-----HEGND--SKV-----D---GLVNFE-KLRMIAKEI---RQVVRMTSANMDP--
-----

>Rapgef6_[Pantholops_hodgsonii]_556768283
STIEVATQLSMRDFDLFRNIEPT----EYI-----DDLFK-L-ES----K-TGN-T----
-----HLKEFEDIVNQETFWVASEILTESNQLKRMKIIKHFIKIA-
LHCRE-CKNFNSMFAIISGLNLASVARLRGTWEKLPSKYEKHFQDLQDLFDPSRNMAKYR
NILSSQSMQP-----PIIPL-FPVVKKDMTFL-----
-----HEGND--SKV-----D---GLVNFE-KLRMIAKEI---RQVVRMTSANMDP--
-----

>Rapgef6_[Parasteatoda_tepidariorum]_1009601738
-SVEVATQLTLEDFSTFRQIEPT----EYI-----DDLFE-V-TS----K-YGI-P----
-----QLSKFAELVNHEMFVVTEVCAEHQLIRMRIVKQFIKVA-
RQCKN-CKNFNSMFAIISGLGHGAVSRLRTTWEKLPTKYQKMFSDLQDLMDPSRNMCKYR
SLLNSEHTQP-----PIIPF-YPVVKKDLTFI-----
-----HLGND--TFV-----D---NLVSIK-K-----
-----

>Rapgef6_[Peromyscus_maniculatus_bairdii]_1008772024
STIEVATQLSMRDFDLFRNIEPT----EYI-----DDLFK-L-DS----K-TGN-T----
-----HLKQFEDIVNQETFWVASEILSESNQLKRMKIIKHFIKIA-
LHCRE-CKNFNSMFAIISGLNLAPVARLRGTWEKLPSKYEKHLQDLQDLFDPSRNMAKYR
NILSSQSMQP-----PIIPL-FPVVKKDMTFL-----
-----HEGND--SKV-----D---GLVNFE-KLRMIAKEI---RHIVRMTSANMDP--
-----

>Rapgef6_[Physeter_catodon]_593723311
STIEVATQLSMRDFDLFRNIEPT----EYI-----DDLFK-L-DS----K-TGN-T----
-----HLKEFEDIVNQETFWVASEILTESNQLKRMKIIKHFIKIA-
LHCRE-CKNFNSMFAIISGLNLASVARLRGTWEKLPSKYEKHLQDLQDLFDPSRNMAKYR

```

```

NILSSQSMQP-----PIIPL-FPVVKKDMTFL-----
-----HEGND--SKV-----D---GLVNFE-KLRMIAKEI---RQVVRMTSANMDP--
-----
>Rapgef6_[Picoides_pubescens]_699645489
STIEVATQLSMRDFELFRNIEPT----EYI-----DDLYK-L-DS----K-TGN-A----
-----HLKQFEDVINQETFWVAMEILAEPNQLKRMKIIKHFIKIA-
LHCRE-CKNFNSMFAVISGLNLAPVARLRGTWEKLPSKYEKHLRDLQDLFDPSRNMAKYR
NILSSQSMQP-----PIIPL-FPVVKKDITFL-----
-----HEGND--SKV-----D---GLVNFE-KLRMIAKEI---RQVVRMTSANMDP--
-----
>Rapgef6_[Poecilia_formosa]_1025473374
STMEVAAQLSMRDFELFRNIEST----EYV-----EDLFK-L-DS----S-AGC---T--
-----NLKQFEEVINQETFWVATEILKEPNTLKRMTIKHFIKIA-
LHCRE-CKNFNSMFAIISGLNLAPVARLRSSWEKLPSKYEKLFEDLQDVFDPSRNMAKYR
NVLSSQSMQP-----PIIPL-FPVVKKDLTFL-----
-----HEGND--SNV-----D---GLVNFE-KLRMIAKEI---RHVVRMTSANMDP--
-----
>Rapgef6_[Poecilia_reticulata]_658884510
STMEVAAQLSMRDFELFRNIEST----EYV-----EDLFK-L-DL----S-AGC---T--
-----NLKQFEEVINQETFWVATEILKEPNTLKRMTIKHFIKIA-
LHCRE-CKNFNSMFAIISGLNLAPVARLRSSWEKLPSKYEKLFEDLQDVFDPSRNMAKYR
NVLSSQSMQP-----PIIPL-FPVVKKDLTFL-----
-----HEGND--SNV-----D---GLVNFE-KLRMIAKEI---RHVVRMTSANMDP--
-----
>Rapgef6_[Polistes_dominula]_972179004
---EVAIQLTLQDFSIFRQIEST----EYV-----DDLFE-L-KS----R-YGI-PM---
-----LSQFAELVNREMFVVTEVCSEHNLVRRSKIIKQFIKIA-
RQCKE-CKNFNSMFAIVSGLGHGAVSRLRASWEKLPSKYQRLFSDLQELMDPSRNMSKYR
QLVASEQTQP-----PIIPF-YPVVKKDLTFI-----
-----HLGND--SRV-----E---SLVNFE-KLRMIAKEV---RTLTMCCSSPYD---
-----
>Rapgef6_[Pongo_abelii]_686719316
STIEVATQLSMRDFDLFRNIEPT----EYI-----DDLFE-L-NS----K-TGN-T----
-----HLKRFEDIVNQETFWVASEILTEANQLKRMKIIKHFIKIA-
LHCRE-CKNFNSMFAIISGLNLASVARLRGTWEKLPSKYEKHLQDLQDIFDPSRNMAKYR
NILSSQSMQP-----PIIPL-FPVVKKDMTFL-----
-----HEGND--SKV-----D---GLVNFE-KLRMISKEI---RQVVRMTSANMDP--
-----
>Rapgef6_[Protobothrops_mucrosquamatus]_1002581315
STIEVATQLSMRDFELFRNIEPT----EYI-----DELYK-L-DS----K-TGN-T----
-----NLKQFEDVINQETFWVATEILSETNQLKRMKIVKHFIKIA-
LHCRE-CKNFNSMFAVISGLNLAPVARLRSTWEKLPSKYEKHLRDLQDLFDPSRNMAKYR
NILSSQSMQP-----PIIPL-FPVVKKDITFL-----
-----HEGND--SKV-----D---GLVNFE-KLRMIAKEI---RQVVRMTSANMDP--
-----
>Rapgef6_[Pseudopodoces_humilis]_929446448
STIEVATQLSMRDFELFRNIEPT----EYI-----DDLYK-L-DS----K-TGN-A----
-----HLKQFEDVINQETFWVAMEILAEPNQLKRMKIIKHFIKIA-
LHCRE-CKNFNSMFAVISGLNLAPVARLRGTWEKLPSKYEKHLRDLQDLFDPSRNMAKYR
NILSSQSMQP-----PIIPL-FPVVKKDITFL-----
-----HEGND--SKV-----D---GLVNFE-KLRMIAKEI---RQVVRMTSANMDP--
-----
>Rapgef6_[Pygoscelis_adeliae]_690439934
STIEVATQLSMRDFELFRNIEPT----EYI-----DDLYK-L-DS----K-TGN-A----

```

```
-----HLKQFEDVINQETFWVAMEILAEPNQLKRMKIIKHFIKIA-
LHCRE-CKNFNSMFAVISGLNLAPVARLRGTWEKLPSKYEKHLRDLQDLFDPSRNMAKYR
NILSSQSMQP-----PIIPL-FPVVKKDITFL-----
-----HEGND--SKV-----D---GLVNFE-KLRMIAKEI---RQVVRMTSANMDP--
-----
>Rapgef6_[Python_bivittatus]_602628149
STIEVATQLSMRDFELFRNIEPT----EYI-----DDLKYK-L-ES----K-TGN-T----
-----NLKQFEDVINQETFWVATEILSEANQLKRMKIVKHFIKIA-
LHCRE-CKNFNSMFAVISGLNLAPVARLRGTWEKLPSKYEKHLRDLQDLFDPSRNMAKYR
NILSSQSMQP-----PIIPL-FPVVKKDITFL-----
-----HEGND--SKV-----D---GLVNFE-KLRMIAKEI---RQVVRMTSANMDP--
-----
>Rapgef6_[Rhinopithecus_roxellana]_724913891
STIEVATQLSMRDFDLFRNIEPT----EYI-----DDLFK-L-NS----K-TGN-T----
-----HLKRFEDIVNQETFWVASEILTEANQLKRMKIIKHFIKIA-
LHCRE-CKNFNSMFAIISGLNLASVARLRGTWEKLPSKYEKHLQDLQDIFDPSRNMAKYR
NILSSQSMQP-----PIIPL-FPVVKKDMTFL-----
-----HEGND--SKV-----D---GLVNFE-KLRMISKEI---RQVVRMTSANMDP--
-----
>Rapgef6_[Rousettus_aegyptiacus]_1012239520
STIELATQLSMRDFDLFRNIEPT----EYI-----GDLFK-L-ES----K-TGN-T----
-----HLKEFENIVNQETFWVASEILTESNQLKRMKIIKHFIKIA-
LHCRE-CKNFNSMFAIISGLNLASVARLRGTWEKLPSKYEKHLQDLQDLFDPSRNMAKYR
NILSSQSMQP-----PIIPL-FPVVKKDMTFL-----
-----HEGND--SKV-----D---GLVNFE-KLRMIAKEI---RQVVRMTSANMDP--
-----
>Rapgef6_[Saimiri_boliviensis_boliviensis]_725550658
STIEVATQLSMRDFDLFRNIEPT----EYI-----DDLFK-L-NS----K-TGN-S----
-----HLKRFEDIVNQETFWVASEILTEANQLKRMKIIKHFIKIA-
LHCRE-CKNFNSMFAIISGLNLASVARLRGTWEKLPSKYEKHLQDLQDIFDPSRNMAKYR
NILSSQSMQP-----PIIPL-FPVVKKDMTFL-----
-----HEGND--SKV-----D---GLVNFE-KLRMISKEI---RQVVRMTSANMDP--
-----
>Rapgef6_[Sarcophilus_harrisii]_821455239
STIEVATQLSMRDFELFRNIEPT----EYI-----DDLFK-L-NS----K-TGN-T----
-----HLKEFEAIINQETFWVATEILTESNQLKRMKMIKHFIKIA-
LHCRE-CKNFNSMFAVISGLNLAPVARLRGTWEKLPSKYEKHFQDLQDLFDPSRNMAKYR
NILSNQSMQP-----PIIPL-FPIVKKDITFL-----
-----HEGND--SKV-----D---GLVNFE-KLRMIAKEI---RQVVRMTSANMDP--
-----
>Rapgef6_[Sinocyclocheilus_anshuiensis]_1024970981
STVEVAAQLSMRDFGLFRNIEST----EYV-----DDLFK-R-DP----G-GGG-S-S--
-----HLKQFEEVINQETFWVATEILREPNALKRMKTIKHFIKIA-
LHCRE-CKNFNSMFAIISGLNLAPVARLRSTWEKLPSKYEKLFRLQDIFDPSRNMAKYR
NILSSQSVQP-----PIIPL-FPVVKKDLTFL-----
-----HEGND--SSV-----D---GLVNFE-KLRMIAKEI---RNVVHMTSANMDP--
-----
>Rapgef6_[Sinocyclocheilus_grahami]_1020491327
STVEVAAQLSMRDFDLFRNIEST----EYV-----DDLFK-R-DP----G-GGG-N-S--
-----HLKQFEEVINQETFWVATEILREPNALKRMKTIKHFIKIA-
LHCRE-CKNFNSMFAIISGLNLAPVARLRSTWEKLPSKYEKLFRLQDIFDPSRNMAKYR
NILSSQSVQP-----PIIPL-FPVVKKDLTFL-----
-----HEGND--SSV-----D---GLVNFE-KLRMIAKEI---RNVVRMTSANMDP--
-----
```

```

>Rapgef6_[Sinocyclocheilus_rhinocerosus]_1025396494
STVEVAAQLSMRDFGLFRNIEST----EYV-----DDLFK-L-DP----G-GGG-S-S--
-----HLKQFEEVINQETFWVATEILREPNAKRMKNIKHFIKIA-
LHCRE-CKNFNSMFAIISGLNLAPVARLRSTWEKLP SKYEKLFRLDQDIFDPSRNMAKYR
NILSSQSVQP-----PIIPL-FPVVKKDLTFL-----
-----HEGND--SSV-----D---GLVNFE-KLRMIAKEI---RHVVRMTSANMDP--
-----

>Rapgef6_[Sorex_araneus]_505829185
STIEVATQLSMRDFDLFRNIEPT----EYI-----DDLFK-L-DS----K-TGN-T----
-----HLKEFEDIVNQETFWVASEVLTESNQLKRMKIIKHFIKIA-
LHCRE-CKNFNSMFAIISGLNLACVARLRGTWEKLP SKYEKHLQDLQDLFDPSRNMAKYR
NILSSQSMQP-----PIIPL-FPVVKKDMTFL-----
-----HEGND--SKV-----D---GLVNFE-KLRMIAKEI---RQVVRMTSANMDP--
-----

>Rapgef6_[Struthio_camelus_australis]_697433805
STIEVATQLSMRDFELFRNIEPT----EYI-----DDLKY-L-DS----K-TGN-A----
-----RLKQFEDVINQETFWVAMEILAEPNQLKRMKIIKHFIKIA-
LHCRE-CKNFNSMFAVISGLNLAPVARLRGTWEKLP SKYEKHLRDLQDLFDPSRNMAKYR
NILSSQSX-----PL-FPVVKKDITFL-----
-----HEGND--SKV-----D---GLVNFE-KLRMIAKEI---RQVVRMTSANMDP--
-----

>Rapgef6_[Sturnus_vulgaris]_959086183
STIEVATQLSMRDFELFRNIEPT----EYI-----DDLKY-L-DS----K-TGN-A----
-----HLKQFEDVINQETFWVAMEILAEPNQLKRMKIIKHFIKIA-
LHCRE-CKNFNSMFAVISGLNLAPVARLRGTWEKLP SKYEKHLRDLQDLFDPSRNMAKYR
NILSSQSMQP-----PIIPL-FPVVKKDITFL-----
-----HEGND--SKV-----D---GLVNFE-KLRMIAKEI---RQVIRMTSANMDP--
-----

>Rapgef6_[Sus_scrofa]_545812182
STIEVATQLSMRDFDLFRNIEPT----EYI-----DDLFK-L-DS----K-TGN-T----
-----HLKEFEDIVNQETFWVASEILTESNQLKRMKIIKHFIKIA-
LHCRE-CKNFNSMFAIISGLNLASVARLRGTWEKLP SKYEKHLQDLQDLFDPSRNMAKYR
NILSSQSMQP-----PIIPL-FPVVKKDMTFL-----
-----HEGND--SKV-----D---GLVNFE-KLRMIAKEI---RQVVRMTSANMDP--
-----

>Rapgef6_[Trichechus_manatus_latirostris]_471406089
STIEMATQLSMRDFDLFRNIEPT----EYI-----DDLFK-L-DS----K-TGN-T----
-----HLKEFEDIVNQETFWVASEILTESNQLKRMKIIKLFIKIA-
LHCRE-CKNFNSMFAIISGLNLAPVARLRGTWEKLP NKYEKHLQDLQDLFDPSRNMAKYR
NILSSQSMQP-----PIIPL-FPVVKKDMTFL-----
-----HEGND--SKV-----D---GLVNFE-KLRMIAKEI---RQVVRMTSANMDP--
-----

>Rapgef6_[Tyto_alba]_701405792
STIEVATQLSMRDFELFRNIEPT----EYI-----DDLKY-L-DS----K-TGN-A----
-----HLKQFEDVINQETFWVAMEILAEANQLKRMKIIKHFIKIA-
LHCRE-CKNFNSMFAVISGLNLAPVARLRGTWEKLP SKYEKHLRDLQDLFDPSRNMAKYR
NILSSQSMQP-----PIIPL-FPVVKKDITFL-----
-----HEGND--SKV-----D---GLVNFE-KLRMIAKEI---RQVVRMTSANMDP--
-----

>Rapgef6_[Ursus_maritimus]_671012702
STIEVATQLSMRDFDLFRNIEPT----EYI-----DDLFK-L-DS----K-TGN-T----
-----HLKEFEDIVNQETFWVASEILTESNQLKRMKIIKHFIKIA-
LHCRE-CKNFNSMFAIISGLNLASVARLRGTWEKLP SKYEKHLQDLQDLFDPSRNMAKYR
NILSSQSMQP-----PIIPL-FPVVKKDMTFL-----

```



```
-----HEGND--SKV-----D---GLVNFE-KLRMIAKEI---RQVVRMTSANMDP--
-----
>Rapgef6_[Vicugna_pacos]_970734891
STIEVATQLSMRDFDLFRNIEPT----EYI-----DDLFK-L-DS----K-TGN-T----
-----HLKEFEDIVNQETFWVASEILTESNQLKRMKIIKHFIKIA-
LHCRE-CKNFNSMFIIISGLNLASVARLRGTWEKLPSKYEKHLHDLQDLFDPSRNMAKYR
NILSSQSMQP-----PIIPL-FPVVKKDMTFL-----
-----HEGND--SKV-----D---GLVNFE-KLRMIAKEI---RQVVRMTSANMDP--
-----
>Rapgef6_[Xiphophorus_maculatus]_941798194
STMEVAAQLSMRDFELFRNIEST----EYV-----EDLFK-L-DS----S-SGC---T--
-----NLKQFEEVINQETFWVATEILKEPNTLKRMKTIKHFIKIA-
LHCRE-CKNFNSMFIIISGLNLAPVARLRSSWEKLPSKYEKLFEDLQDVFDPSRNMAKYR
NVLSSQSMQP-----PIIPL-FPVVKKDLTFL-----
-----HEGND--SNV-----D---GLVNFE-KLRMIAKEI---RHVVRMTSANMDP--
-----
```
